# Supplementary material
Source: HighWire-hosted journal article supplement (doi:10.1101/rna.080097.124)
Supplement: Supplemental_TableS01.xlsx [file Supplemental_TableS01.xlsx]

## Sheet: Countess
Replicate	Cell line	Type	Total Concentration	Total cells counted	Live concentration	Live cells counted	Dead concentration	Dead cells counted	Viability (%)	Avgerage Size [µm]	Live Size min	Live Size max	Live Brightness min	Live Brightness max	Live Circularity	Dead Size min	Dead Size max	Dead Bright min	Dead Bright max	Dead Circularity	Software Revision
1	Huh7.5 ADAR1 KO	BF	3730010	636	3266691	557	463319	79	87.5786	18.4528	7	50	0	255	0.479441	8	58	5.5	249.5	0.480688	1.0.249
1	Huh7.5 wt	BF	4539352	774	3911819	667	627533	107	86.1757	17.3992	7	50	0	255	0.405124	8	58	5.5	249.5	0.442872	1.0.249
2	Huh7.5 ADAR1 KO	BF	4691837	800	4228518	721	463319	79	90.125	18.3612	7	50	0	255	0.398246	8	58	5.5	249.5	0.507396	1.0.249
2	Huh7.5 wt	BF	4099492	699	3542337	604	557156	95	86.4092	19.9485	7	50	0	255	0.409776	8	58	5.5	249.5	0.431216	1.0.249
3	Huh7.5 ADAR1 KO	BF	6468870	1103	5495314	937	973556	166	84.9501	16.8359	7	50	0	255	0.447451	8	58	5.5	249.5	0.451759	1.0.249
3	Huh7.5 ADAR1 KO	BF	6128712	1045	5284181	901	844531	144	86.2201	17.1971	7	50	0	255	0.389604	8	58	5.5	249.5	0.494827	1.0.249
3	Huh7.5 wt	BF	3941143	672	3483689	594	457454	78	88.3929	17.0804	7	50	0	255	0.468826	8	58	5.5	249.5	0.331588	1.0.249
4	Huh7.5 wt	BF	2873750	490	2533592	432	340158	58	88.1633	18.1918	6	50	0	255	0.415965	8	58	5.5	249.5	0.279148	1.0.249
4	Huh7.5 ADAR1 KO	BF	6046605	1031	5073049	865	973556	166	83.8991	16.2076	6	50	0	255	0.424282	8	58	5.5	249.5	0.431216	1.0.249
	Huh7.5 ADAR1 KO count	Huh7.5 ADAR1 KO size [µm]	Huh7.5 wt count	Huh7.5 wt size [µm]	Huh7.5 ADAR1 KO/wt size
1	557	18.4528	667	17.3992	1.06055
2	721	18.3612	604	19.9485	0.920433
3	1838	17.013	594	17.0804	0.996055
4	865	16.2076	432	18.1918	0.890925
Average		17.2836		18.1362	0.952992
