# Supplementary material
Source: HighWire-hosted journal article supplement (doi:10.1101/rna.080097.124)
Supplement: Supplemental_TableS03.xlsx [file Supplemental_TableS03.xlsx]

## Sheet: Summary_Growth_Curves
											Huh7.5 wt																																				Huh7.5 ADAR1 KO
	medium										1:7									1:11									1:7 IFN									1:11 IFN									1:4,5
	0	12	24	36	48	60	72	84	92		0	12	24	36	48	60	72	84	92	0	12	24	36	48	60	72	84	92	0	12	24	36	48	60	72	84	92	0	12	24	36	48	60	72	84	92	92	0	12
medium	191.359	182.379	167.429	182.078		183.758	190.517	195.163	190.587	raw	503.544	563.711	695.574	1000.67	1122.63	1432.63	1728.3	1723.82	1819.6	418.983	465.904	548.088	753.907	837.039	1155.35	1436.51	1386.2	1574.97	519.419	550.685	716.882	960.526	1050.63	1337.08	1655.68	1711.35	1823.72	429.579	434.521	536.227	718.744	835.643	1043.23	1327.08	1303.06	1435.37	468.251	449.107	595.574
	188.832	180.916	165.571	179.496	172.484	181.965	187.601	191.722	192.187		514.993	548.398	715.943	988.848	1091.03	1415.56	1790.26	1721.49	1829.98	411.729	456.297	557.803	773.339	862.63	1121.18	1488.38	1395.95	1516.08	530.597	546.584	724.122	949.059	1023.28	1386	1662.51	1639.92	1761.02	409.061	443.559	534.581	757.36	793.527	1068.88	1358.07	1344.6	1495.45	456.773	425.103	612.273
	189.551	181.739	164.312	181.249	176.579	177.726	190.385	191.073	189.153		500.691	559.6	708.858	997.412	1131.02	1456.53	1811.45	1689.63	1834.85	417.07	462.264	552.038	771.296	873.19	1094.92	1401.82	1470.42	1517.31	516.195	548.069	688.998	988.119	1096.78	1344.96	1654.38	1576.14	1753.94	429.041	435.528	531.277	721.666	808.753	1063.91	1274.99	1291.46	1460.52	462.239	413.359	591.734
average	189.914	181.678	165.771	180.941	174.531	181.15	189.501	192.653	190.642
IFN medium	183.084	182.055	170.435	178.877	165.092	177.886	187.215	194.272	186.91	blank corr.	313.63	382.033	529.803	819.729	948.099	1251.48	1538.8	1531.17	1628.96	229.069	284.226	382.317	572.966	662.507	974.2	1247.01	1193.55	1384.33	332.867	372.16	548.221	778.567	880.665	1159.32	1467.75	1519.03	1635.4	243.027	255.996	367.566	536.785	665.678	865.467	1139.15	1110.74	1247.05	278.337	267.429	429.803
	188.477	175.689	170.9	185.916	179.066	175.225	188.74	190.301	189.124		325.079	366.72	550.172	807.907	916.498	1234.41	1600.76	1528.84	1639.34	221.815	274.619	392.032	592.398	688.099	940.03	1298.88	1203.3	1325.44	344.045	368.059	555.461	767.1	853.315	1208.24	1474.58	1447.6	1572.7	222.509	265.034	365.92	575.401	623.562	891.117	1170.14	1152.28	1307.13	266.859	243.425	446.502
	188.094	177.83	164.647	181.083	165.736	180.177	187.849	192.393	188.923		310.777	377.922	543.087	816.471	956.488	1275.38	1621.95	1496.98	1644.21	227.156	280.586	386.267	590.355	698.659	913.77	1212.32	1277.77	1326.67	329.643	369.544	520.337	806.16	926.815	1167.2	1466.45	1383.82	1565.62	242.489	257.003	362.616	539.707	638.788	886.147	1087.06	1099.14	1272.2	272.325	231.681	425.963
average	186.552	178.525	168.661	181.959	169.965	177.763	187.935	192.322	188.319	average	316.495	375.558	541.021	814.702	940.362	1253.76	1587.17	1518.99	1637.5	226.013	279.81	386.872	585.24	683.088	942.667	1252.74	1224.87	1345.48	335.519	369.921	541.34	783.943	886.932	1178.25	1469.59	1450.15	1591.24	236.009	259.345	365.368	550.631	642.676	880.911	1132.11	1120.72	1275.46	272.507	247.512	434.09
										SD	6.18031	6.47107	8.443	4.98572	17.2181	16.8032	35.2798	15.5972	6.3598	3.06968	3.96021	3.98914	8.71878	15.1779	24.7408	35.5692	37.6148	27.4757	6.17125	1.69532	15.1424	16.3929	30.3317	21.4464	3.56582	55.2287	31.3593	9.548	4.04415	2.05827	17.5556	17.4122	11.107	34.2799	22.8132	24.6356	4.68764	14.8774	8.91598
										DoublingTime [h]	30.93									28.91									32.67	32.67	32.67	32.67	32.67	32.67	32.67	32.67	32.67	29.68	29.68	29.68	29.68	29.68	29.68	29.68	29.68	29.68	29.82	29.82	29.82
										GrowthRate	0.0224									0.024									0.0212	0.0212	0.0212	0.0212	0.0212	0.0212	0.0212	0.0212	0.0212	0.0234	0.0234	0.0234	0.0234	0.0234	0.0234	0.0234	0.0234	0.0234	0.0232	0.0232	0.0232
										%OfWt	1									1.07143									0.946429									1.04464									1
[truncated: 33 more columns]
