# Supplementary material
Source: HighWire-hosted journal article supplement (doi:10.1101/rna.080097.124)
Supplement: Supplemental_TableS04.xlsx [file Supplemental_TableS04.xlsx]

## Sheet: enrichment_results_total_RNA_BP
geneSet	description	link	enrichmentScore	normalizedEnrichmentScore	pValue	FDR	size	leadingEdgeNum	userId
GO:0006383	transcription by RNA polymerase III	http://amigo.geneontology.org/amigo/term/GO:0006383	-0.598843	-2.14233	0	0.00409983	53	30	ENSG00000009694;ENSG00000012048;ENSG00000023608;ENSG00000028839;ENSG00000065029;ENSG00000077235;ENSG00000099817;ENSG00000100142;ENSG00000100413;ENSG00000100888;ENSG00000104221;ENSG00000105656;ENSG00000112592;ENSG00000113356;ENSG00000121851;ENSG00000122034;ENSG00000125484;ENSG00000141564;ENSG00000144161;ENSG00000147669;ENSG00000148308;ENSG00000155115;ENSG00000164975;ENSG00000165684;ENSG00000171453…
GO:0008380	RNA splicing	http://amigo.geneontology.org/amigo/term/GO:0008380	-0.419168	-2.01393	0	0.0175524	390	174	ENSG00000004487;ENSG00000005075;ENSG00000011243;ENSG00000011304;ENSG00000039123;ENSG00000060339;ENSG00000061936;ENSG00000064607;ENSG00000064703;ENSG00000067596;ENSG00000068394;ENSG00000070495;ENSG00000071626;ENSG00000071894;ENSG00000075292;ENSG00000075856;ENSG00000076924;ENSG00000079785;ENSG00000084463;ENSG00000085872;ENSG00000086589;ENSG00000087087;ENSG00000087302;ENSG00000088247;ENSG00000092199…
GO:0031579	membrane raft organization	http://amigo.geneontology.org/amigo/term/GO:0031579	-0.735447	-1.9936	0.000411184	0.0161858	16	7	ENSG00000105971;ENSG00000105974;ENSG00000131378;ENSG00000132589;ENSG00000148180;ENSG00000197747;ENSG00000213853
GO:0006397	mRNA processing	http://amigo.geneontology.org/amigo/term/GO:0006397	-0.405451	-1.97203	0	0.0166235	449	197	ENSG00000004487;ENSG00000005075;ENSG00000011243;ENSG00000011304;ENSG00000014164;ENSG00000039123;ENSG00000060339;ENSG00000061936;ENSG00000064607;ENSG00000064703;ENSG00000067596;ENSG00000068394;ENSG00000070495;ENSG00000071626;ENSG00000071894;ENSG00000072062;ENSG00000075856;ENSG00000076924;ENSG00000079785;ENSG00000084463;ENSG00000085872;ENSG00000086589;ENSG00000087087;ENSG00000088247;ENSG00000091542…
GO:0045995	regulation of embryonic development	http://amigo.geneontology.org/amigo/term/GO:0045995	-0.492473	-1.9696	0	0.0138113	94	28	ENSG00000019144;ENSG00000072062;ENSG00000101076;ENSG00000104375;ENSG00000107984;ENSG00000114251;ENSG00000118137;ENSG00000119396;ENSG00000121068;ENSG00000123572;ENSG00000125378;ENSG00000126016;ENSG00000136689;ENSG00000136830;ENSG00000140807;ENSG00000143147;ENSG00000148204;ENSG00000148400;ENSG00000155760;ENSG00000161800;ENSG00000162738;ENSG00000164690;ENSG00000165556;ENSG00000165730;ENSG00000180340…
GO:0043588	skin development	http://amigo.geneontology.org/amigo/term/GO:0043588	-0.447853	-1.95631	0	0.0140718	171	62	ENSG00000027075;ENSG00000057294;ENSG00000066468;ENSG00000069482;ENSG00000075426;ENSG00000096696;ENSG00000096872;ENSG00000099284;ENSG00000101311;ENSG00000107984;ENSG00000108244;ENSG00000111057;ENSG00000111424;ENSG00000112378;ENSG00000112658;ENSG00000113648;ENSG00000114251;ENSG00000116285;ENSG00000116539;ENSG00000117632;ENSG00000122592;ENSG00000124102;ENSG00000125686;ENSG00000129437;ENSG00000131023…
GO:0031503	protein-containing complex localization	http://amigo.geneontology.org/amigo/term/GO:0031503	-0.420545	-1.93088	0	0.0174792	248	101	ENSG00000004478;ENSG00000005007;ENSG00000006125;ENSG00000011243;ENSG00000014164;ENSG00000030066;ENSG00000033122;ENSG00000047410;ENSG00000058804;ENSG00000065000;ENSG00000069248;ENSG00000071894;ENSG00000075461;ENSG00000075945;ENSG00000079805;ENSG00000079950;ENSG00000079974;ENSG00000081870;ENSG00000088986;ENSG00000089685;ENSG00000092820;ENSG00000093000;ENSG00000095319;ENSG00000096872;ENSG00000100227…
GO:0008544	epidermis development	http://amigo.geneontology.org/amigo/term/GO:0008544	-0.427749	-1.92334	0	0.0169118	206	71	ENSG00000006611;ENSG00000015285;ENSG00000027075;ENSG00000055732;ENSG00000057294;ENSG00000058085;ENSG00000066468;ENSG00000069482;ENSG00000075426;ENSG00000079999;ENSG00000095397;ENSG00000096696;ENSG00000096872;ENSG00000099284;ENSG00000100106;ENSG00000101311;ENSG00000104413;ENSG00000107984;ENSG00000108244;ENSG00000111057;ENSG00000111424;ENSG00000112378;ENSG00000113648;ENSG00000114251;ENSG00000116285…
GO:0071166	ribonucleoprotein complex localization	http://amigo.geneontology.org/amigo/term/GO:0071166	-0.457204	-1.90517	0	0.0193176	123	46	ENSG00000005007;ENSG00000011243;ENSG00000014164;ENSG00000030066;ENSG00000047410;ENSG00000058804;ENSG00000069248;ENSG00000071894;ENSG00000093000;ENSG00000095319;ENSG00000100227;ENSG00000101146;ENSG00000102900;ENSG00000108349;ENSG00000109111;ENSG00000111581;ENSG00000113569;ENSG00000115268;ENSG00000116698;ENSG00000119392;ENSG00000120253;ENSG00000120533;ENSG00000123136;ENSG00000125450;ENSG00000126883…
GO:0031016	pancreas development	http://amigo.geneontology.org/amigo/term/GO:0031016	-0.515015	-1.86546	0.000636267	0.0294035	57	12	ENSG00000016082;ENSG00000101076;ENSG00000114251;ENSG00000116833;ENSG00000125378;ENSG00000139515;ENSG00000141448;ENSG00000160712;ENSG00000167244;ENSG00000169856;ENSG00000185002;ENSG00000275410
GO:0003014	renal system process	http://amigo.geneontology.org/amigo/term/GO:0003014	-0.488986	-1.86325	0.00021173	0.0273827	72	16	ENSG00000005249;ENSG00000072062;ENSG00000078401;ENSG00000108946;ENSG00000118515;ENSG00000121281;ENSG00000123143;ENSG00000125378;ENSG00000136160;ENSG00000146021;ENSG00000148180;ENSG00000167306;ENSG00000167711;ENSG00000173175;ENSG00000181104;ENSG00000213853
GO:0034113	heterotypic cell-cell adhesion	http://amigo.geneontology.org/amigo/term/GO:0034113	-0.555124	-1.85143	0.0010513	0.0286454	38	12	ENSG00000026508;ENSG00000057294;ENSG00000096696;ENSG00000111846;ENSG00000112378;ENSG00000118137;ENSG00000132589;ENSG00000136689;ENSG00000161638;ENSG00000173801;ENSG00000196776;ENSG00000259207
GO:0007163	establishment or maintenance of cell polarity	http://amigo.geneontology.org/amigo/term/GO:0007163	-0.424203	-1.84157	0	0.0292704	166	37	ENSG00000044115;ENSG00000071127;ENSG00000073350;ENSG00000075618;ENSG00000080824;ENSG00000085741;ENSG00000092820;ENSG00000101311;ENSG00000107104;ENSG00000108669;ENSG00000113645;ENSG00000114251;ENSG00000114541;ENSG00000116117;ENSG00000116584;ENSG00000118046;ENSG00000119487;ENSG00000125249;ENSG00000126016;ENSG00000129654;ENSG00000131899;ENSG00000132589;ENSG00000136861;ENSG00000143376;ENSG00000146425…
GO:0006403	RNA localization	http://amigo.geneontology.org/amigo/term/GO:0006403	-0.40639	-1.82701	0	0.0323868	217	75	ENSG00000005007;ENSG00000011243;ENSG00000014164;ENSG00000030066;ENSG00000047410;ENSG00000055044;ENSG00000058804;ENSG00000069248;ENSG00000071894;ENSG00000087302;ENSG00000088247;ENSG00000093000;ENSG00000095319;ENSG00000100227;ENSG00000101146;ENSG00000102898;ENSG00000102900;ENSG00000108349;ENSG00000109111;ENSG00000111224;ENSG00000112110;ENSG00000112531;ENSG00000113569;ENSG00000115268;ENSG00000115484…
GO:0044091	membrane biogenesis	http://amigo.geneontology.org/amigo/term/GO:0044091	-0.597518	-1.82337	0.00147183	0.0315772	26	11	ENSG00000034693;ENSG00000105971;ENSG00000105974;ENSG00000115306;ENSG00000131378;ENSG00000132589;ENSG00000133216;ENSG00000151150;ENSG00000161249;ENSG00000197747;ENSG00000213853
GO:0045165	cell fate commitment	http://amigo.geneontology.org/amigo/term/GO:0045165	-0.424072	-1.80106	0	0.0383959	140	41	ENSG00000005073;ENSG00000016082;ENSG00000057657;ENSG00000064309;ENSG00000066468;ENSG00000071564;ENSG00000085741;ENSG00000104413;ENSG00000105701;ENSG00000105996;ENSG00000107611;ENSG00000107984;ENSG00000108379;ENSG00000111186;ENSG00000114251;ENSG00000115738;ENSG00000116584;ENSG00000121068;ENSG00000125378;ENSG00000129514;ENSG00000131023;ENSG00000131759;ENSG00000134250;ENSG00000139352;ENSG00000139445…
GO:0071772	response to BMP	http://amigo.geneontology.org/amigo/term/GO:0071772	-0.439486	-1.78798	0.000430756	0.0421363	101	19	ENSG00000081479;ENSG00000097007;ENSG00000105701;ENSG00000107984;ENSG00000108854;ENSG00000114251;ENSG00000125378;ENSG00000138795;ENSG00000139219;ENSG00000140479;ENSG00000141448;ENSG00000142871;ENSG00000148204;ENSG00000151388;ENSG00000157933;ENSG00000163430;ENSG00000168509;ENSG00000170801;ENSG00000187045
GO:1904837	beta-catenin-TCF complex assembly	http://amigo.geneontology.org/amigo/term/GO:1904837	-0.5635	-1.78762	0.00415024	0.0399164	30	10	ENSG00000116128;ENSG00000127616;ENSG00000136997;ENSG00000138795;ENSG00000163348;ENSG00000165617;ENSG00000168646;ENSG00000171016;ENSG00000175792;ENSG00000196781
GO:0042303	molting cycle	http://amigo.geneontology.org/amigo/term/GO:0042303	-0.465161	-1.78175	0.000209864	0.040324	73	26	ENSG00000006607;ENSG00000066468;ENSG00000069482;ENSG00000101311;ENSG00000104290;ENSG00000107984;ENSG00000114251;ENSG00000134363;ENSG00000135503;ENSG00000135960;ENSG00000139292;ENSG00000148400;ENSG00000151748;ENSG00000162738;ENSG00000163472;ENSG00000164379;ENSG00000164690;ENSG00000165240;ENSG00000168036;ENSG00000168214;ENSG00000173083;ENSG00000182004;ENSG00000196591;ENSG00000196712;ENSG00000197461…
GO:0007369	gastrulation	http://amigo.geneontology.org/amigo/term/GO:0007369	-0.422756	-1.77293	0.000445434	0.0421129	128	24	ENSG00000005073;ENSG00000019144;ENSG00000072062;ENSG00000085741;ENSG00000101076;ENSG00000107984;ENSG00000108946;ENSG00000111799;ENSG00000114251;ENSG00000118137;ENSG00000125378;ENSG00000126016;ENSG00000136689;ENSG00000138795;ENSG00000141448;ENSG00000148204;ENSG00000155760;ENSG00000157557;ENSG00000161638;ENSG00000162738;ENSG00000204262;ENSG00000204872;ENSG00000259207;ENSG00000275410
GO:2000273	positive regulation of signaling receptor activity	http://amigo.geneontology.org/amigo/term/GO:2000273	-0.591104	-1.75222	0.00829876	0.0494115	23	8	ENSG00000075461;ENSG00000111832;ENSG00000125686;ENSG00000133216;ENSG00000142192;ENSG00000146918;ENSG00000184160;ENSG00000189056
GO:0007214	gamma-aminobutyric acid signaling pathway	http://amigo.geneontology.org/amigo/term/GO:0007214	0.64703	1.7286	0.0103516	0.0438746	16	8	ENSG00000111886;ENSG00000113327;ENSG00000122733;ENSG00000146276;ENSG00000151834;ENSG00000154822;ENSG00000163285;ENSG00000204681
GO:0098542	defense response to other organism	http://amigo.geneontology.org/amigo/term/GO:0098542	0.38904	1.73389	0	0.0438324	249	62	ENSG00000012504;ENSG00000056972;ENSG00000067182;ENSG00000068903;ENSG00000081181;ENSG00000089127;ENSG00000091592;ENSG00000096088;ENSG00000101782;ENSG00000104765;ENSG00000105329;ENSG00000105372;ENSG00000105373;ENSG00000106100;ENSG00000106366;ENSG00000111331;ENSG00000112343;ENSG00000115009;ENSG00000116031;ENSG00000117228;ENSG00000117586;ENSG00000119917;ENSG00000119922;ENSG00000119927;ENSG00000121060…
GO:0015849	organic acid transport	http://amigo.geneontology.org/amigo/term/GO:0015849	0.394991	1.74523	0.000183824	0.0411561	226	48	ENSG00000003989;ENSG00000005471;ENSG00000010379;ENSG00000012504;ENSG00000023839;ENSG00000067715;ENSG00000073734;ENSG00000079385;ENSG00000084453;ENSG00000105281;ENSG00000108846;ENSG00000111700;ENSG00000112337;ENSG00000115840;ENSG00000115902;ENSG00000116711;ENSG00000118596;ENSG00000121769;ENSG00000123983;ENSG00000130876;ENSG00000134294;ENSG00000134538;ENSG00000134548;ENSG00000135124;ENSG00000135744…
GO:0006814	sodium ion transport	http://amigo.geneontology.org/amigo/term/GO:0006814	0.42818	1.76121	0	0.0369757	131	55	ENSG00000002746;ENSG00000007314;ENSG00000033867;ENSG00000058668;ENSG00000060237;ENSG00000069849;ENSG00000069869;ENSG00000073734;ENSG00000074621;ENSG00000080493;ENSG00000088836;ENSG00000088992;ENSG00000099822;ENSG00000102316;ENSG00000105329;ENSG00000105711;ENSG00000108961;ENSG00000111319;ENSG00000111371;ENSG00000112337;ENSG00000114279;ENSG00000114796;ENSG00000118762;ENSG00000120519;ENSG00000130529…
GO:0042180	cellular ketone metabolic process	http://amigo.geneontology.org/amigo/term/GO:0042180	0.418912	1.76261	0	0.0387471	157	49	ENSG00000006831;ENSG00000012504;ENSG00000050165;ENSG00000058668;ENSG00000062282;ENSG00000072310;ENSG00000079385;ENSG00000090857;ENSG00000101255;ENSG00000103150;ENSG00000109576;ENSG00000110243;ENSG00000110245;ENSG00000110871;ENSG00000113161;ENSG00000114859;ENSG00000115159;ENSG00000115919;ENSG00000119508;ENSG00000121039;ENSG00000121769;ENSG00000123684;ENSG00000130208;ENSG00000130948;ENSG00000135469…
GO:0070972	protein localization to endoplasmic reticulum	http://amigo.geneontology.org/amigo/term/GO:0070972	0.430171	1.76973	0.000185185	0.0381953	132	68	ENSG00000008952;ENSG00000008988;ENSG00000058262;ENSG00000067167;ENSG00000071082;ENSG00000083845;ENSG00000089009;ENSG00000089157;ENSG00000100196;ENSG00000101558;ENSG00000105193;ENSG00000105372;ENSG00000105438;ENSG00000108107;ENSG00000109475;ENSG00000110700;ENSG00000114391;ENSG00000114850;ENSG00000114902;ENSG00000116251;ENSG00000118181;ENSG00000120341;ENSG00000122026;ENSG00000129128;ENSG00000134419…
GO:0010876	lipid localization	http://amigo.geneontology.org/amigo/term/GO:0010876	0.392606	1.78224	0	0.0356066	286	81	ENSG00000005421;ENSG00000005469;ENSG00000005471;ENSG00000006025;ENSG00000011347;ENSG00000012504;ENSG00000023171;ENSG00000038945;ENSG00000062282;ENSG00000073060;ENSG00000073734;ENSG00000079385;ENSG00000083807;ENSG00000084453;ENSG00000091583;ENSG00000100300;ENSG00000100979;ENSG00000108846;ENSG00000110048;ENSG00000110243;ENSG00000110245;ENSG00000111700;ENSG00000116711;ENSG00000118777;ENSG00000119655…
GO:0072376	protein activation cascade	http://amigo.geneontology.org/amigo/term/GO:0072376	0.491373	1.78316	0.00172051	0.0379903	62	19	ENSG00000000971;ENSG00000003436;ENSG00000091583;ENSG00000112936;ENSG00000117601;ENSG00000120885;ENSG00000125730;ENSG00000127241;ENSG00000139178;ENSG00000143278;ENSG00000157131;ENSG00000159403;ENSG00000165471;ENSG00000166278;ENSG00000175899;ENSG00000180210;ENSG00000182326;ENSG00000205403;ENSG00000243649
GO:0051932	synaptic transmission, GABAergic	http://amigo.geneontology.org/amigo/term/GO:0051932	0.596648	1.80195	0.00233599	0.0332682	26	10	ENSG00000104267;ENSG00000113327;ENSG00000122733;ENSG00000139182;ENSG00000151834;ENSG00000152910;ENSG00000154822;ENSG00000163285;ENSG00000169992;ENSG00000171862
GO:0044282	small molecule catabolic process	http://amigo.geneontology.org/amigo/term/GO:0044282	0.403416	1.87011	0	0.0163702	357	102	ENSG00000003987;ENSG00000005421;ENSG00000005469;ENSG00000006534;ENSG00000033170;ENSG00000036473;ENSG00000054179;ENSG00000058668;ENSG00000060971;ENSG00000060982;ENSG00000072210;ENSG00000072571;ENSG00000081181;ENSG00000084110;ENSG00000099256;ENSG00000100889;ENSG00000101577;ENSG00000103150;ENSG00000103485;ENSG00000104823;ENSG00000105329;ENSG00000105852;ENSG00000107537;ENSG00000107897;ENSG00000108515…
GO:0019748	secondary metabolic process	http://amigo.geneontology.org/amigo/term/GO:0019748	0.554528	1.8847	0.00038373	0.0151524	44	15	ENSG00000060971;ENSG00000105755;ENSG00000105852;ENSG00000107165;ENSG00000132437;ENSG00000137767;ENSG00000140465;ENSG00000144935;ENSG00000145439;ENSG00000151012;ENSG00000151632;ENSG00000187134;ENSG00000196139;ENSG00000198074;ENSG00000198610
GO:0016042	lipid catabolic process	http://amigo.geneontology.org/amigo/term/GO:0016042	0.432891	1.91906	0	0.0106266	235	76	ENSG00000005469;ENSG00000006007;ENSG00000025423;ENSG00000060971;ENSG00000068903;ENSG00000070610;ENSG00000072210;ENSG00000074416;ENSG00000075651;ENSG00000085871;ENSG00000087076;ENSG00000100344;ENSG00000100889;ENSG00000101577;ENSG00000101846;ENSG00000102393;ENSG00000103056;ENSG00000103150;ENSG00000104823;ENSG00000105499;ENSG00000107537;ENSG00000107798;ENSG00000107897;ENSG00000109193;ENSG00000110243…
GO:0097164	ammonium ion metabolic process	http://amigo.geneontology.org/amigo/term/GO:0097164	0.45749	1.92158	0	0.0115574	150	54	ENSG00000005421;ENSG00000005469;ENSG00000016391;ENSG00000073060;ENSG00000087085;ENSG00000088826;ENSG00000092969;ENSG00000100596;ENSG00000101577;ENSG00000103056;ENSG00000105499;ENSG00000110243;ENSG00000111684;ENSG00000114200;ENSG00000116711;ENSG00000121316;ENSG00000121769;ENSG00000123983;ENSG00000126821;ENSG00000127948;ENSG00000130066;ENSG00000130208;ENSG00000130768;ENSG00000132437;ENSG00000134324…
GO:1901615	organic hydroxy compound metabolic process	http://amigo.geneontology.org/amigo/term/GO:1901615	0.417162	1.94674	0	0.00905446	379	127	ENSG00000003987;ENSG00000005421;ENSG00000006007;ENSG00000006025;ENSG00000006534;ENSG00000012174;ENSG00000012504;ENSG00000042445;ENSG00000050165;ENSG00000052802;ENSG00000060971;ENSG00000062282;ENSG00000067064;ENSG00000070610;ENSG00000072042;ENSG00000072210;ENSG00000072310;ENSG00000073060;ENSG00000073734;ENSG00000079459;ENSG00000083807;ENSG00000092969;ENSG00000099194;ENSG00000099377;ENSG00000100003…
GO:0008202	steroid metabolic process	http://amigo.geneontology.org/amigo/term/GO:0008202	0.439232	1.95354	0	0.00954125	246	92	ENSG00000005379;ENSG00000005421;ENSG00000006025;ENSG00000010270;ENSG00000012174;ENSG00000012504;ENSG00000025423;ENSG00000050165;ENSG00000052802;ENSG00000060971;ENSG00000062282;ENSG00000067064;ENSG00000070610;ENSG00000072310;ENSG00000073060;ENSG00000073734;ENSG00000079459;ENSG00000083807;ENSG00000087076;ENSG00000099194;ENSG00000099377;ENSG00000100003;ENSG00000100300;ENSG00000100867;ENSG00000101846…
GO:0006631	fatty acid metabolic process	http://amigo.geneontology.org/amigo/term/GO:0006631	0.446913	2.02878	0	0.0036802	288	106	ENSG00000005421;ENSG00000005469;ENSG00000006831;ENSG00000008394;ENSG00000052802;ENSG00000060971;ENSG00000062282;ENSG00000066322;ENSG00000066813;ENSG00000067182;ENSG00000072210;ENSG00000072310;ENSG00000074416;ENSG00000079385;ENSG00000081760;ENSG00000083807;ENSG00000090857;ENSG00000091140;ENSG00000099194;ENSG00000100031;ENSG00000100219;ENSG00000100344;ENSG00000100889;ENSG00000101255;ENSG00000101577…
GO:0006638	neutral lipid metabolic process	http://amigo.geneontology.org/amigo/term/GO:0006638	0.548298	2.1291	0	0.00088976	91	35	ENSG00000062282;ENSG00000065357;ENSG00000074416;ENSG00000091583;ENSG00000100344;ENSG00000100889;ENSG00000101577;ENSG00000110243;ENSG00000110245;ENSG00000111664;ENSG00000114771;ENSG00000119927;ENSG00000121769;ENSG00000124003;ENSG00000125730;ENSG00000130208;ENSG00000134324;ENSG00000134780;ENSG00000136267;ENSG00000138678;ENSG00000140526;ENSG00000145335;ENSG00000151726;ENSG00000153933;ENSG00000158874…
GO:1901568	fatty acid derivative metabolic process	http://amigo.geneontology.org/amigo/term/GO:1901568	0.533225	2.13457	0	0.00111062	109	34	ENSG00000005421;ENSG00000008394;ENSG00000062282;ENSG00000067182;ENSG00000074416;ENSG00000081760;ENSG00000085871;ENSG00000099194;ENSG00000105499;ENSG00000105852;ENSG00000106853;ENSG00000107165;ENSG00000111058;ENSG00000116711;ENSG00000117305;ENSG00000123983;ENSG00000131067;ENSG00000134240;ENSG00000134780;ENSG00000138109;ENSG00000140465;ENSG00000149084;ENSG00000149485;ENSG00000151632;ENSG00000151726…
GO:0033865	nucleoside bisphosphate metabolic process	http://amigo.geneontology.org/amigo/term/GO:0033865	0.527669	2.14885	0	0.00121159	120	40	ENSG00000005469;ENSG00000062282;ENSG00000066322;ENSG00000066813;ENSG00000090857;ENSG00000091140;ENSG00000099194;ENSG00000103150;ENSG00000109193;ENSG00000109576;ENSG00000112972;ENSG00000113161;ENSG00000115919;ENSG00000117305;ENSG00000119689;ENSG00000119927;ENSG00000120137;ENSG00000123130;ENSG00000123983;ENSG00000127125;ENSG00000131069;ENSG00000134240;ENSG00000145335;ENSG00000149084;ENSG00000150768…
GO:0009308	amine metabolic process	http://amigo.geneontology.org/amigo/term/GO:0009308	0.602624	2.22417	0	0.000302897	68	25	ENSG00000006007;ENSG00000012504;ENSG00000058668;ENSG00000088826;ENSG00000109576;ENSG00000115919;ENSG00000130066;ENSG00000140465;ENSG00000145335;ENSG00000145692;ENSG00000148832;ENSG00000150540;ENSG00000151012;ENSG00000151790;ENSG00000153086;ENSG00000153234;ENSG00000153982;ENSG00000155465;ENSG00000170775;ENSG00000173597;ENSG00000181019;ENSG00000183044;ENSG00000189221;ENSG00000197165;ENSG00000198203

## Sheet: enrichment_results_total_RNA_MF
geneSet	description	link	enrichmentScore	normalizedEnrichmentScore	pValue	FDR	size	leadingEdgeNum	userId
GO:0051018	protein kinase A binding	http://amigo.geneontology.org/amigo/term/GO:0051018	-0.582362	-1.95498	0.000213767	0.0427387	39	12	ENSG00000005249;ENSG00000011243;ENSG00000072062;ENSG00000092820;ENSG00000105127;ENSG00000108946;ENSG00000118507;ENSG00000131016;ENSG00000131759;ENSG00000164488;ENSG00000165617;ENSG00000179841
GO:0042826	histone deacetylase binding	http://amigo.geneontology.org/amigo/term/GO:0042826	-0.486759	-1.95067	0	0.0223785	98	30	ENSG00000011243;ENSG00000057657;ENSG00000057935;ENSG00000068024;ENSG00000080824;ENSG00000088305;ENSG00000100916;ENSG00000102409;ENSG00000105127;ENSG00000105556;ENSG00000108773;ENSG00000108953;ENSG00000112312;ENSG00000112658;ENSG00000116560;ENSG00000117399;ENSG00000123143;ENSG00000131747;ENSG00000131759;ENSG00000138795;ENSG00000143799;ENSG00000158773;ENSG00000160685;ENSG00000165617;ENSG00000167085…
GO:0016627	oxidoreductase activity, acting on the CH-CH group of donors	http://amigo.geneontology.org/amigo/term/GO:0016627	0.496037	1.76205	0.000574163	0.0300904	56	16	ENSG00000014919;ENSG00000042445;ENSG00000060971;ENSG00000106853;ENSG00000115425;ENSG00000128928;ENSG00000149809;ENSG00000151498;ENSG00000151632;ENSG00000168306;ENSG00000172893;ENSG00000180011;ENSG00000187134;ENSG00000196139;ENSG00000196177;ENSG00000242612
GO:0016757	transferase activity, transferring glycosyl groups	http://amigo.geneontology.org/amigo/term/GO:0016757	0.405647	1.7846	0	0.025706	219	83	ENSG00000008513;ENSG00000009830;ENSG00000016864;ENSG00000033100;ENSG00000033170;ENSG00000041880;ENSG00000059378;ENSG00000060642;ENSG00000068903;ENSG00000068976;ENSG00000069943;ENSG00000073849;ENSG00000086848;ENSG00000099256;ENSG00000099810;ENSG00000100564;ENSG00000100994;ENSG00000101638;ENSG00000102595;ENSG00000102699;ENSG00000103485;ENSG00000105835;ENSG00000106003;ENSG00000106392;ENSG00000106397…
GO:1901618	organic hydroxy compound transmembrane transporter activity	http://amigo.geneontology.org/amigo/term/GO:1901618	0.586845	1.81842	0.00306044	0.0196527	29	14	ENSG00000073734;ENSG00000079385;ENSG00000084453;ENSG00000108576;ENSG00000108846;ENSG00000111700;ENSG00000118596;ENSG00000134538;ENSG00000137491;ENSG00000148942;ENSG00000158865;ENSG00000186198;ENSG00000198610;ENSG00000205754
GO:0016705	oxidoreductase activity, acting on paired donors, with incorporation or reduction of molecular oxygen	http://amigo.geneontology.org/amigo/term/GO:0016705	0.453895	1.81978	0	0.0217551	110	24	ENSG00000021461;ENSG00000052802;ENSG00000099194;ENSG00000106258;ENSG00000107537;ENSG00000109929;ENSG00000110811;ENSG00000111012;ENSG00000134824;ENSG00000138109;ENSG00000140465;ENSG00000145476;ENSG00000149485;ENSG00000151632;ENSG00000152952;ENSG00000170271;ENSG00000174939;ENSG00000186204;ENSG00000186529;ENSG00000187134;ENSG00000187546;ENSG00000197408;ENSG00000198363;ENSG00000198610
GO:0140103	catalytic activity, acting on a glycoprotein	http://amigo.geneontology.org/amigo/term/GO:0140103	0.66185	1.82591	0.00311163	0.023184	18	9	ENSG00000033170;ENSG00000106392;ENSG00000131446;ENSG00000140297;ENSG00000161013;ENSG00000171155;ENSG00000176928;ENSG00000182050;ENSG00000223658
GO:0005342	organic acid transmembrane transporter activity	http://amigo.geneontology.org/amigo/term/GO:0005342	0.451858	1.83583	0	0.0239778	121	33	ENSG00000003989;ENSG00000010379;ENSG00000023839;ENSG00000073734;ENSG00000079385;ENSG00000084453;ENSG00000105281;ENSG00000108846;ENSG00000111700;ENSG00000112337;ENSG00000115840;ENSG00000115902;ENSG00000118596;ENSG00000130876;ENSG00000134294;ENSG00000134538;ENSG00000137491;ENSG00000138079;ENSG00000139209;ENSG00000148942;ENSG00000149150;ENSG00000149742;ENSG00000151012;ENSG00000155465;ENSG00000162383…
GO:0019955	cytokine binding	http://amigo.geneontology.org/amigo/term/GO:0019955	0.494396	1.8427	0.000560433	0.0262395	71	29	ENSG00000006016;ENSG00000049323;ENSG00000067182;ENSG00000090539;ENSG00000099250;ENSG00000112964;ENSG00000113494;ENSG00000113594;ENSG00000115170;ENSG00000116678;ENSG00000117228;ENSG00000121797;ENSG00000128016;ENSG00000128791;ENSG00000134352;ENSG00000135218;ENSG00000138448;ENSG00000142677;ENSG00000144648;ENSG00000145623;ENSG00000147168;ENSG00000156535;ENSG00000162594;ENSG00000163513;ENSG00000168056…
GO:0016229	steroid dehydrogenase activity	http://amigo.geneontology.org/amigo/term/GO:0016229	0.653734	1.96536	0.000388199	0.0061056	26	9	ENSG00000025423;ENSG00000087076;ENSG00000132196;ENSG00000147383;ENSG00000149084;ENSG00000151632;ENSG00000187134;ENSG00000198189;ENSG00000198610
GO:0004497	monooxygenase activity	http://amigo.geneontology.org/amigo/term/GO:0004497	0.566565	2.02853	0.000191681	0.00305627	56	16	ENSG00000021461;ENSG00000052802;ENSG00000106258;ENSG00000107165;ENSG00000111012;ENSG00000138109;ENSG00000140465;ENSG00000145476;ENSG00000151632;ENSG00000170271;ENSG00000186204;ENSG00000186529;ENSG00000187134;ENSG00000187546;ENSG00000197408;ENSG00000198610
GO:0005319	lipid transporter activity	http://amigo.geneontology.org/amigo/term/GO:0005319	0.502997	2.04633	0	0.00337579	120	44	ENSG00000005471;ENSG00000006025;ENSG00000023171;ENSG00000073734;ENSG00000079385;ENSG00000083807;ENSG00000084453;ENSG00000100300;ENSG00000100979;ENSG00000101166;ENSG00000108846;ENSG00000110048;ENSG00000110243;ENSG00000111700;ENSG00000114698;ENSG00000118777;ENSG00000119655;ENSG00000121769;ENSG00000134538;ENSG00000137491;ENSG00000138075;ENSG00000138760;ENSG00000141179;ENSG00000141391;ENSG00000141447…
GO:0016614	oxidoreductase activity, acting on CH-OH group of donors	http://amigo.geneontology.org/amigo/term/GO:0016614	0.591029	2.36478	0	0	109	45	ENSG00000016391;ENSG00000025423;ENSG00000049239;ENSG00000072042;ENSG00000072210;ENSG00000087076;ENSG00000099377;ENSG00000100867;ENSG00000106348;ENSG00000106853;ENSG00000109814;ENSG00000113161;ENSG00000113790;ENSG00000115159;ENSG00000117448;ENSG00000121039;ENSG00000130948;ENSG00000132196;ENSG00000135437;ENSG00000142657;ENSG00000145439;ENSG00000147383;ENSG00000147576;ENSG00000149084;ENSG00000151116…

## Sheet: enrichment_results_total_RNA_CC
geneSet	description	link	enrichmentScore	normalizedEnrichmentScore	pValue	FDR	size	leadingEdgeNum	userId
GO:0005681	spliceosomal complex	http://amigo.geneontology.org/amigo/term/GO:0005681	-0.503631	-2.19252	0	0.000548843	170	80	ENSG00000005007;ENSG00000039123;ENSG00000067596;ENSG00000068394;ENSG00000076924;ENSG00000086589;ENSG00000092199;ENSG00000092208;ENSG00000096401;ENSG00000099622;ENSG00000099783;ENSG00000099995;ENSG00000100028;ENSG00000100056;ENSG00000100109;ENSG00000100138;ENSG00000100319;ENSG00000100410;ENSG00000100941;ENSG00000101161;ENSG00000104177;ENSG00000104897;ENSG00000105248;ENSG00000105298;ENSG00000105705…
GO:0008180	COP9 signalosome	http://amigo.geneontology.org/amigo/term/GO:0008180	-0.619259	-1.96658	0.000413565	0.00816404	30	16	ENSG00000044574;ENSG00000079819;ENSG00000088986;ENSG00000100345;ENSG00000111652;ENSG00000126016;ENSG00000136842;ENSG00000137312;ENSG00000144524;ENSG00000145041;ENSG00000166025;ENSG00000169727;ENSG00000172428;ENSG00000177885;ENSG00000204389;ENSG00000213672
GO:0030684	preribosome	http://amigo.geneontology.org/amigo/term/GO:0030684	-0.504327	-1.91612	0.0002096	0.0113885	72	40	ENSG00000011260;ENSG00000055044;ENSG00000065183;ENSG00000067533;ENSG00000087269;ENSG00000100029;ENSG00000100138;ENSG00000108592;ENSG00000108651;ENSG00000112578;ENSG00000114767;ENSG00000117133;ENSG00000117395;ENSG00000117597;ENSG00000119285;ENSG00000124541;ENSG00000124784;ENSG00000126749;ENSG00000129347;ENSG00000129460;ENSG00000130810;ENSG00000132004;ENSG00000135521;ENSG00000138442;ENSG00000141076…
GO:0035145	exon-exon junction complex	http://amigo.geneontology.org/amigo/term/GO:0035145	-0.63638	-1.82877	0.0031224	0.025041	20	5	ENSG00000100941;ENSG00000108349;ENSG00000141543;ENSG00000183684;ENSG00000265241
GO:0120114	Sm-like protein family complex	http://amigo.geneontology.org/amigo/term/GO:0120114	-0.473593	-1.80554	0	0.0256035	72	29	ENSG00000064703;ENSG00000075856;ENSG00000092208;ENSG00000099995;ENSG00000100028;ENSG00000100138;ENSG00000100410;ENSG00000104897;ENSG00000108848;ENSG00000108883;ENSG00000117360;ENSG00000124562;ENSG00000125835;ENSG00000125870;ENSG00000130332;ENSG00000130520;ENSG00000136875;ENSG00000139343;ENSG00000142039;ENSG00000143977;ENSG00000144028;ENSG00000168883;ENSG00000169976;ENSG00000170860;ENSG00000171960…
GO:1905368	peptidase complex	http://amigo.geneontology.org/amigo/term/GO:1905368	-0.439791	-1.7245	0.000425351	0.0499905	84	27	ENSG00000008018;ENSG00000041357;ENSG00000068878;ENSG00000087152;ENSG00000095261;ENSG00000100519;ENSG00000100567;ENSG00000100764;ENSG00000100902;ENSG00000108344;ENSG00000108671;ENSG00000109501;ENSG00000117525;ENSG00000119318;ENSG00000120533;ENSG00000131467;ENSG00000135018;ENSG00000136813;ENSG00000136930;ENSG00000142507;ENSG00000143106;ENSG00000159352;ENSG00000159377;ENSG00000160803;ENSG00000165916…
GO:0045171	intercellular bridge	http://amigo.geneontology.org/amigo/term/GO:0045171	-0.463267	-1.65202	0.00906026	0.0497389	52	25	ENSG00000025770;ENSG00000064490;ENSG00000072062;ENSG00000084693;ENSG00000088325;ENSG00000103005;ENSG00000107290;ENSG00000109103;ENSG00000112984;ENSG00000116260;ENSG00000121101;ENSG00000126698;ENSG00000127837;ENSG00000134184;ENSG00000134202;ENSG00000134253;ENSG00000134690;ENSG00000136936;ENSG00000141577;ENSG00000144048;ENSG00000144597;ENSG00000145945;ENSG00000161981;ENSG00000177483;ENSG00000214367
GO:0042827	platelet dense granule	http://amigo.geneontology.org/amigo/term/GO:0042827	0.693445	1.83559	0.00233508	0.0241102	15	6	ENSG00000041353;ENSG00000091583;ENSG00000100665;ENSG00000135404;ENSG00000162267;ENSG00000250722
GO:0072562	blood microparticle	http://amigo.geneontology.org/amigo/term/GO:0072562	0.524626	1.98318	0	0.00658787	79	22	ENSG00000000971;ENSG00000005421;ENSG00000047457;ENSG00000105329;ENSG00000117601;ENSG00000120885;ENSG00000121410;ENSG00000125730;ENSG00000135744;ENSG00000145192;ENSG00000145321;ENSG00000151655;ENSG00000157131;ENSG00000158874;ENSG00000159403;ENSG00000163631;ENSG00000164111;ENSG00000167772;ENSG00000175899;ENSG00000180210;ENSG00000182326;ENSG00000243649
