# Supplementary material
Source: HighWire-hosted journal article supplement (doi:10.1101/rna.080097.124)
Supplement: Supplemental_TableS05.xlsx [file Supplemental_TableS05.xlsx]

## Sheet: DESeq2_results_polysome_loading
	baseMean	log2FoldChange	lfcSE	stat	pvalue	padj
ENSG00000000003	6567.01	0.305816	0.186571	1.63914	0.101184	0.38575
ENSG00000000419	4697.89	0.0824637	0.196003	0.420727	0.673954	0.875281
ENSG00000000457	1080.74	-0.0556958	0.143739	-0.387478	0.698402	0.886099
ENSG00000000460	1879.39	-0.195559	0.208785	-0.936656	0.348935	0.670595
ENSG00000000971	1728.85	-0.364622	0.198318	-1.83858	0.0659776	0.312496
ENSG00000001036	7195.72	-0.0738096	0.188841	-0.390856	0.695904	0.885155
ENSG00000001084	1283.73	-0.338114	0.18013	-1.87706	0.0605098	0.297883
ENSG00000001167	3470.89	-0.078714	0.195001	-0.40366	0.686463	0.880758
ENSG00000001460	402.649	0.0626064	0.240077	0.260776	0.794265	0.927087
ENSG00000001461	863.599	0.000266998	0.194126	0.00137538	0.998903	0.999692
ENSG00000001497	1639.1	-0.906252	0.178711	-5.07106	3.95602e-07	0.000172886
ENSG00000001561	195.725	-0.260144	0.29785	-0.873406	0.382442	0.700342
ENSG00000001617	428.359	0.414885	0.298476	1.39001	0.164525	0.488026
ENSG00000001626	93.1258	0.701578	0.379109	1.8506	0.0642277	0.30811
ENSG00000001629	2379.13	-0.176323	0.158091	-1.11532	0.264713	0.596175
ENSG00000001630	175.222	0.108918	0.822482	0.132427	0.894647	0.959907
ENSG00000001631	2032.67	-0.0563312	0.161748	-0.348266	0.727641	0.897612
ENSG00000002016	1008.3	0.351752	0.190126	1.8501	0.0642997	0.308349
ENSG00000002330	466.516	0.606693	0.34671	1.74986	0.0801428	0.34678
ENSG00000002549	2718.27	-0.726725	0.204485	-3.55393	0.000379516	0.0139611
ENSG00000002586	3899.47	0.25821	0.164741	1.56736	0.117029	0.416222
ENSG00000002746	296.909	0.32548	0.255117	1.27581	0.202024	0.535054
ENSG00000002822	544.54	-0.00856494	0.292862	-0.0292456	0.976669	0.991794
ENSG00000002834	8792.46	0.00287432	0.287639	0.00999279	0.992027	0.997075
ENSG00000002919	1700.32	0.321046	0.220508	1.45594	0.14541	0.463023
ENSG00000003056	5967.92	0.507458	0.216175	2.34744	0.0189027	0.1584
ENSG00000003096	373.924	-0.254372	0.204854	-1.24172	0.214338	0.54894
ENSG00000003137	1459.13	0.693805	0.197724	3.50896	0.000449864	0.0155597
ENSG00000003147	1227.12	-0.113413	0.185125	-0.612632	0.54012	0.801003
ENSG00000003249	2323.43	0.433245	0.28812	1.50369	0.13266	0.445042
ENSG00000003393	2915.68	-0.37448	0.168045	-2.22846	0.0258502	0.186951
ENSG00000003400	886.911	-0.241436	0.179005	-1.34876	0.177413	0.504524
ENSG00000003402	2398.41	-0.134179	0.164841	-0.813992	0.41565	0.724246
ENSG00000003436	5144.98	-0.0616379	0.155336	-0.396804	0.691512	0.882667
ENSG00000003509	664.992	-0.045874	0.219656	-0.208845	0.834569	0.940786
ENSG00000003756	5037.2	-0.0408431	0.225851	-0.180841	0.856492	0.946487
ENSG00000003989	7531.87	-0.272468	0.15649	-1.74113	0.0816614	0.348162
ENSG00000004059	2789.8	0.669236	0.215053	3.11195	0.00185853	0.0384922
ENSG00000004139	205.94	-0.114077	0.286552	-0.398102	0.690555	0.882667
ENSG00000004142	8612.7	0.281161	0.230936	1.21748	0.223421	0.557343
ENSG00000004399	2865.88	-0.356098	0.233924	-1.52228	0.127939	0.436456
ENSG00000004455	5850.77	0.470637	0.205798	2.28689	0.0222021	0.172298
ENSG00000004468	920.693	-0.0678398	0.300892	-0.225462	0.82162	0.937371
ENSG00000004478	7444.78	-0.410927	0.208206	-1.97365	0.048421	0.266788
ENSG00000004487	4796.05	-0.519922	0.164914	-3.15268	0.00161778	0.03588
ENSG00000004534	3526.23	-0.0439407	0.167407	-0.262479	0.792952	0.926206
ENSG00000004700	887.453	0.0757244	0.198439	0.381601	0.702757	0.887913
ENSG00000004766	756.222	-0.289948	0.204497	-1.41786	0.156232	0.477462
ENSG00000004777	167.375	0.274419	0.39651	0.692085	0.488884	0.771409
ENSG00000004779	3987.63	0.0832659	0.191265	0.435343	0.663314	0.869935
ENSG00000004799	49.4106	-0.151007	0.428667	-0.352271	0.724635	0.896549
ENSG00000004838	75.2799	0.591845	0.375393	1.5766	0.114888	0.413285
ENSG00000004864	5269.95	-0.447439	0.166096	-2.69385	0.00706319	0.0873592
ENSG00000004866	3991.44	0.0454791	0.188968	0.240671	0.80981	0.93262
ENSG00000004897	3699.98	-0.515251	0.182976	-2.81595	0.00486331	0.0686571
ENSG00000004961	1379.53	0.237244	0.160916	1.47433	0.140392	0.456587
ENSG00000004975	1663.15	0.245535	0.180572	1.35976	0.173906	0.5001
ENSG00000005007	2655.11	0.137926	0.231839	0.59492	0.551897	0.807905
ENSG00000005020	644.92	-0.335609	0.276081	-1.21562	0.22413	0.558381
ENSG00000005022	21394.5	0.263201	0.197528	1.33247	0.182704	0.510753
ENSG00000005059	231.516	0.131334	0.236303	0.555788	0.578356	0.824426
ENSG00000005073	114.601	0.216686	0.303268	0.714502	0.474917	0.762079
ENSG00000005075	3718.91	0.424092	0.315768	1.34305	0.179256	0.506669
ENSG00000005100	2250.98	-0.0509837	0.207148	-0.246122	0.805588	0.931202
ENSG00000005108	655.848	-0.338319	0.277031	-1.22123	0.221999	0.556272
ENSG00000005156	2481.89	-0.274375	0.212509	-1.29112	0.196661	0.529004
ENSG00000005175	1981.24	-0.740466	0.18784	-3.94201	8.0801e-05	0.00492459
ENSG00000005187	924.169	-0.296769	0.388779	-0.763336	0.445263	0.744437
ENSG00000005189	539.218	0.270044	0.237301	1.13798	0.255128	0.588375
ENSG00000005194	2428.7	-0.00762615	0.203305	-0.0375108	0.970078	0.989383
ENSG00000005206	588.128	0.284791	0.34433	0.827087	0.408188	0.719736
ENSG00000005238	200.648	0.278759	0.290689	0.95896	0.337579	0.662168
ENSG00000005249	409.823	0.62361	0.224679	2.77556	0.00551072	0.0745996
ENSG00000005302	100.148	1.28129	1.68732	0.759366	0.447634	0.746041
ENSG00000005339	1273.52	-0.287069	0.258066	-1.11239	0.265973	0.597262
ENSG00000005421	2006.93	-0.332274	0.204059	-1.62832	0.103456	0.390161
ENSG00000005436	1289.74	-0.179957	0.19086	-0.94287	0.345747	0.669036
ENSG00000005448	91.6414	0.648411	0.395771	1.63835	0.101349	0.386272
ENSG00000005469	325.961	-0.0902294	0.268525	-0.336018	0.736857	0.901546
ENSG00000005471	1198.78	-0.42367	0.270991	-1.56341	0.117957	0.418581
ENSG00000005483	3254.15	-0.52191	0.180518	-2.89118	0.00383799	0.0588676
ENSG00000005486	2387.3	0.0340979	0.23306	0.146305	0.883681	0.956958
ENSG00000005700	5280	-0.482042	0.178745	-2.69681	0.00700071	0.0870286
ENSG00000005801	2021.25	-0.000511903	0.167999	-0.00304706	0.997569	0.999085
ENSG00000005810	1230.16	-0.199108	0.213423	-0.932926	0.350858	0.672826
ENSG00000005812	1866.5	0.0166465	0.185036	0.0899637	0.928316	0.972323
ENSG00000005844	562.485	-0.132812	0.246984	-0.537736	0.590759	0.832636
ENSG00000005889	2532.32	-0.158288	0.151724	-1.04326	0.296827	0.629365
ENSG00000005893	3577.54	-0.640508	0.26268	-2.43835	0.0147543	0.136814
ENSG00000006007	3025.16	-0.00211586	0.201808	-0.0104845	0.991635	0.997021
ENSG00000006015	1121.63	0.671633	0.342163	1.9629	0.0496573	0.269553
ENSG00000006016	182.75	0.622665	0.733318	0.849106	0.395822	0.710764
ENSG00000006042	5442.49	0.209141	0.168538	1.24091	0.214638	0.549489
ENSG00000006062	380.391	0.575907	0.242159	2.37822	0.0173967	0.150334
ENSG00000006118	2295.99	0.334764	0.304129	1.10073	0.271014	0.601457
ENSG00000006125	11052	-0.0925494	0.204227	-0.45317	0.650427	0.862381
ENSG00000006194	1378.18	0.312795	0.218483	1.43166	0.15224	0.472781
ENSG00000006210	1152.63	-0.416557	0.285423	-1.45944	0.144444	0.462043
ENSG00000006282	1976.11	0.32337	0.27389	1.18066	0.23774	0.572321
ENSG00000006327	3133.48	0.113362	0.36805	0.308008	0.758076	0.909874
ENSG00000006377	511.2	0.549348	0.197499	2.78153	0.00541036	0.0738917
ENSG00000006432	544.716	-0.31415	0.240514	-1.30616	0.191497	0.52194
ENSG00000006451	3700.51	0.184573	0.211558	0.872445	0.382966	0.700456
ENSG00000006453	3761.51	-0.109709	0.152736	-0.718293	0.472577	0.760741
ENSG00000006459	907.659	-0.283668	0.175254	-1.61861	0.105531	0.394232
ENSG00000006468	885.783	-0.214363	0.173876	-1.23285	0.217631	0.552151
ENSG00000006530	1513.86	-0.408829	0.16747	-2.44121	0.0146383	0.136103
ENSG00000006534	145.873	0.0550609	0.379692	0.145014	0.8847	0.957388
ENSG00000006555	77.2919	-0.0674996	0.368439	-0.183204	0.854638	0.945913
ENSG00000006576	605.759	-0.0923486	0.26038	-0.354669	0.722837	0.895614
ENSG00000006607	1517.73	-0.315168	0.203074	-1.55198	0.120666	0.424464
ENSG00000006611	1163.59	-0.410135	0.212752	-1.92776	0.0538856	0.280266
ENSG00000006625	2618.17	0.0697433	0.130323	0.535156	0.592542	0.833387
ENSG00000006634	3206.41	-0.202881	0.250826	-0.80885	0.418601	0.726457
ENSG00000006652	6942.92	-0.207537	0.168949	-1.2284	0.219296	0.554147
ENSG00000006695	1144.19	-0.0261009	0.181131	-0.1441	0.885422	0.957442
ENSG00000006704	600.894	-0.109542	0.196619	-0.557129	0.577439	0.824426
ENSG00000006712	1448.3	-0.372754	0.140991	-2.64381	0.00819792	0.096444
ENSG00000006715	1670.75	-0.550823	0.178118	-3.09247	0.001985	0.0399703
ENSG00000006744	1463.12	-0.426086	0.159498	-2.67143	0.00755294	0.0914216
ENSG00000006747	97.3317	0.104296	0.363033	0.28729	0.77389	0.917147
ENSG00000006756	294.298	-0.220195	0.216946	-1.01498	0.310118	0.641807
ENSG00000006757	1058.34	0.154294	0.207656	0.74303	0.457464	0.752356
ENSG00000006831	12320.7	0.032566	0.193468	0.168327	0.866326	0.950204
ENSG00000007047	1161.1	-0.0536022	0.210913	-0.254144	0.799385	0.928671
ENSG00000007062	2014.1	-0.564897	0.298265	-1.89394	0.0582328	0.291691
ENSG00000007080	1745.9	0.541575	0.583957	0.927423	0.353707	0.674865
ENSG00000007168	3035.34	-0.391624	0.18479	-2.11929	0.0340658	0.219006
ENSG00000007202	15232.1	-0.215457	0.169957	-1.26771	0.2049	0.539115
ENSG00000007255	1128.69	0.759343	0.347891	2.1827	0.0290577	0.200806
ENSG00000007314	49.2343	0.309024	0.506164	0.610522	0.541516	0.802245
ENSG00000007341	1262.44	-0.367013	0.207247	-1.7709	0.076577	0.33907
ENSG00000007372	381.969	-0.200035	0.331772	-0.60293	0.546555	0.805128
ENSG00000007376	946.044	0.995798	0.559177	1.78083	0.0749406	0.334885
ENSG00000007384	354.072	0.456234	0.321251	1.42018	0.155556	0.476765
ENSG00000007392	2042.66	0.253928	0.158319	1.6039	0.108736	0.401484
ENSG00000007520	1252.5	0.624913	0.326658	1.91305	0.0557416	0.285714
ENSG00000007541	385.686	0.767266	0.378175	2.02886	0.0424721	0.247829
ENSG00000007545	389.881	-0.357155	0.196935	-1.81357	0.0697442	0.322713
ENSG00000007866	1043.82	0.337667	0.146664	2.30231	0.0213175	0.167967
ENSG00000007923	4226.84	-0.0833237	0.13419	-0.620937	0.534641	0.79859
ENSG00000007944	775.551	0.280674	0.203529	1.37903	0.167884	0.491259
ENSG00000007968	917.389	0.185244	0.236942	0.781812	0.434325	0.736183
ENSG00000008018	13595.2	0.418921	0.171193	2.44707	0.0144021	0.134904
ENSG00000008083	670.251	-0.419477	0.204228	-2.05396	0.0399795	0.239423
ENSG00000008086	541.065	-0.308505	0.276538	-1.1156	0.264594	0.596175
ENSG00000008130	4915.11	0.126872	0.199087	0.637271	0.523949	0.792395
ENSG00000008256	298.979	-0.131736	0.212418	-0.620172	0.535144	0.798712
ENSG00000008277	454.635	-0.243008	0.257634	-0.943231	0.345563	0.668993
ENSG00000008282	3069.84	0.10798	0.193606	0.557727	0.57703	0.824426
ENSG00000008294	2444.72	-0.620266	0.194527	-3.18858	0.00142971	0.0336396
ENSG00000008300	227.466	-0.0114384	0.307373	-0.0372133	0.970315	0.989383
ENSG00000008311	628.875	0.0350857	0.229158	0.153107	0.878314	0.954779
ENSG00000008323	694.897	0.0654198	0.253041	0.258535	0.795994	0.927453
ENSG00000008324	5687.68	-0.00291179	0.182609	-0.0159455	0.987278	0.995992
ENSG00000008382	711.995	0.391121	0.271719	1.43943	0.150028	0.469821
ENSG00000008394	28212.4	0.140096	0.184483	0.759396	0.447616	0.746041
ENSG00000008405	1853.66	0.239259	0.193633	1.23563	0.216596	0.550533
ENSG00000008441	395.826	0.0256382	0.249468	0.102772	0.918144	0.968665
ENSG00000008513	1199.32	-0.0251516	0.212409	-0.118411	0.905742	0.965032
ENSG00000008517	568.271	0.314811	0.635706	0.495214	0.620449	0.846001
ENSG00000008710	416.883	0.173479	0.725891	0.238987	0.811116	0.933195
ENSG00000008838	2674.18	-0.0756247	0.174404	-0.433617	0.664566	0.87067
ENSG00000008853	409.485	0.0723488	0.187929	0.384978	0.700253	0.886672
ENSG00000008869	541.62	-0.0916064	0.228915	-0.400177	0.689026	0.88192
ENSG00000008952	4834.81	-0.525557	0.159555	-3.29389	0.000988113	0.0269105
ENSG00000008988	52785.6	0.838329	0.215305	3.89367	9.87372e-05	0.00559848
ENSG00000009307	47477	-0.441054	0.234424	-1.88144	0.0599124	0.296357
ENSG00000009335	5688.24	-0.144059	0.184012	-0.782879	0.433698	0.735681
ENSG00000009413	1680.6	-0.418613	0.185545	-2.25612	0.0240631	0.179807
ENSG00000009780	445.637	0.177776	0.230008	0.772914	0.439574	0.739185
ENSG00000009830	800.112	0.101662	0.192325	0.528593	0.597088	0.835396
ENSG00000009844	4122.5	-0.361213	0.18798	-1.92155	0.054663	0.282333
ENSG00000009950	395.493	0.262038	0.393955	0.665146	0.505957	0.782108
ENSG00000009954	3850.37	-0.571779	0.218139	-2.62116	0.00876305	0.100495
ENSG00000010017	1721.45	-0.166689	0.157886	-1.05576	0.291079	0.623677
ENSG00000010072	1362.71	-0.268582	0.156888	-1.71193	0.08691	0.357431
ENSG00000010165	1645.25	-0.0638341	0.187572	-0.340317	0.733618	0.900266
ENSG00000010219	599.843	-0.0804762	0.244809	-0.32873	0.742359	0.90337
ENSG00000010244	4908	-0.31692	0.182788	-1.73381	0.0829511	0.349746
ENSG00000010256	7186.33	-0.202156	0.176362	-1.14625	0.251691	0.584939
ENSG00000010270	4050.85	0.0129431	0.207455	0.06239	0.950252	0.98133
ENSG00000010278	232.53	1.18035	0.272362	4.33374	1.46597e-05	0.0016152
ENSG00000010292	7116.88	-0.231676	0.150181	-1.54264	0.122918	0.428078
ENSG00000010295	1231.92	0.215408	0.193767	1.11168	0.266274	0.597524
ENSG00000010318	151.886	0.253126	0.279425	0.905882	0.364998	0.684173
ENSG00000010322	804.623	0.0259123	0.24365	0.106351	0.915304	0.96759
ENSG00000010379	93.1554	0.257849	0.306769	0.840531	0.40061	0.714986
ENSG00000010404	818.199	-0.278674	0.201398	-1.3837	0.166451	0.489533
ENSG00000010539	393.516	0.17609	0.239989	0.733742	0.463106	0.75528
ENSG00000010626	444.787	0.194867	0.226432	0.860598	0.38946	0.705501
ENSG00000010704	399.676	0.157558	0.22436	0.702253	0.482521	0.766263
ENSG00000010803	4592.48	-0.000486714	0.13256	-0.00367164	0.99707	0.999038
ENSG00000010810	322.25	0.144456	0.312638	0.462054	0.644043	0.859349
ENSG00000010818	413.886	-0.142133	0.215611	-0.659211	0.50976	0.783694
ENSG00000011007	4141.55	-0.539838	0.202866	-2.66106	0.00778962	0.0928246
ENSG00000011009	5091.47	0.737074	0.232611	3.1687	0.00153121	0.034853
ENSG00000011021	3988.05	0.0721199	0.183527	0.392966	0.694345	0.884636
ENSG00000011105	2016.78	0.198325	0.21587	0.918728	0.358238	0.679493
ENSG00000011114	2128.63	-0.256653	0.175687	-1.46086	0.144054	0.461554
ENSG00000011132	497.215	0.881957	0.367123	2.40235	0.0162903	0.144375
ENSG00000011143	418.313	-0.142273	0.235957	-0.60296	0.546535	0.805128
ENSG00000011198	1785.56	-0.0222948	0.239231	-0.0931936	0.92575	0.971361
ENSG00000011243	1912.56	-0.336422	0.157328	-2.13834	0.0324891	0.213635
ENSG00000011258	1655.07	-0.0757811	0.167267	-0.453054	0.65051	0.862381
ENSG00000011260	1868.81	-0.775465	0.187612	-4.13334	3.57532e-05	0.00277891
ENSG00000011275	2253.09	-0.152248	0.154657	-0.984421	0.324908	0.652672
ENSG00000011295	1600.93	-0.0440719	0.207522	-0.212372	0.831817	0.940108
ENSG00000011304	13979.6	-0.368859	0.22695	-1.62529	0.1041	0.391261
ENSG00000011332	45.7234	0.387595	0.442084	0.876744	0.380626	0.698851
ENSG00000011347	790.897	0.030734	0.225785	0.136121	0.891726	0.959184
ENSG00000011376	1452.95	-0.533024	0.173424	-3.07354	0.00211537	0.0414299
ENSG00000011405	2986.72	-0.689046	0.184045	-3.7439	0.000181184	0.00843999
ENSG00000011422	260.256	0.972068	0.362464	2.68183	0.00732196	0.089487
ENSG00000011426	4550.48	-0.18796	0.253592	-0.741192	0.458577	0.752793
ENSG00000011451	2569.37	-0.217526	0.337622	-0.644288	0.519389	0.788949
ENSG00000011454	2707.76	-0.358879	0.13918	-2.57852	0.00992254	0.109298
ENSG00000011478	1372.87	0.464909	0.189836	2.44901	0.0143251	0.13437
ENSG00000011485	3591.75	-0.0311008	0.134327	-0.231531	0.816902	0.935273
ENSG00000011523	794.275	-0.146422	0.178428	-0.820622	0.411862	0.72256
ENSG00000011566	1808.32	-0.453905	0.175034	-2.59324	0.00950773	0.106166
ENSG00000011638	66.3675	-0.251327	0.383311	-0.655674	0.512034	0.785452
ENSG00000012048	1802.4	-0.231462	0.192306	-1.20362	0.228738	0.563389
ENSG00000012061	2329.5	0.602732	0.203729	2.9585	0.00309138	0.0519676
ENSG00000012171	124.496	0.418838	0.380273	1.10141	0.270716	0.601375
ENSG00000012174	812.552	-0.239366	0.200188	-1.19571	0.231811	0.565827
ENSG00000012211	478.135	0.157132	0.260554	0.603068	0.546463	0.805128
ENSG00000012232	1504.96	0.0407085	0.144797	0.281142	0.778602	0.920349
ENSG00000012504	11896.5	-0.312492	0.179353	-1.74233	0.0814515	0.347567
ENSG00000012660	5242.59	0.0269814	0.196429	0.137359	0.890747	0.958877
ENSG00000012822	398.474	0.340471	0.286302	1.1892	0.23436	0.569336
ENSG00000012963	979.932	-0.211299	0.188953	-1.11827	0.263454	0.595374
ENSG00000012983	1431.14	-0.409446	0.178084	-2.29917	0.0214951	0.168968
ENSG00000013275	10781.9	0.189654	0.188218	1.00763	0.313632	0.643497
ENSG00000013288	1880.75	0.0508988	0.25806	0.197236	0.843643	0.942349
ENSG00000013306	12772.9	0.327938	0.261937	1.25197	0.21058	0.546115
ENSG00000013364	214.119	0.0168333	0.331133	0.0508354	0.959457	0.984172
ENSG00000013374	1862.01	-0.354841	0.179323	-1.97878	0.0478408	0.264963
ENSG00000013375	4291.33	-0.361767	0.160039	-2.26049	0.0237911	0.178498
ENSG00000013392	446.593	0.693813	0.208194	3.33253	0.000860609	0.0244487
ENSG00000013441	4295.14	0.0140162	0.298908	0.0468914	0.9626	0.985537
ENSG00000013503	955.357	-0.134697	0.203501	-0.661899	0.508036	0.783069
ENSG00000013523	424.84	-0.0993983	0.248246	-0.400402	0.68886	0.88192
ENSG00000013561	2529.32	-0.14249	0.205694	-0.692726	0.488482	0.771119
ENSG00000013563	820.346	0.284895	0.179649	1.58584	0.112776	0.408873
ENSG00000013573	1084.46	0.280525	0.22082	1.27038	0.203948	0.537441
ENSG00000013583	1591.27	0.355976	0.15408	2.31034	0.0208695	0.166504
ENSG00000013619	286.28	-0.119167	0.247899	-0.480707	0.630725	0.851823
ENSG00000013810	4646.54	-0.585069	0.150533	-3.88666	0.000101633	0.0056672
ENSG00000014123	1073.33	-0.564202	0.177763	-3.17391	0.00150402	0.0345781
ENSG00000014138	983.893	-0.190593	0.248518	-0.766916	0.443131	0.742222
ENSG00000014164	373.154	0.0927858	0.359844	0.25785	0.796523	0.927837
ENSG00000014216	1306.29	-0.450013	0.235939	-1.90733	0.0564783	0.288126
ENSG00000014641	6122.3	-0.277255	0.190877	-1.45253	0.146353	0.463976
ENSG00000014824	5301.71	-0.2806	0.154844	-1.81215	0.0699628	0.322974
ENSG00000014919	2647.23	-0.319699	0.190132	-1.68146	0.0926743	0.368222
ENSG00000015133	623.894	-0.140571	0.251606	-0.558697	0.576368	0.824426
ENSG00000015153	1130.34	-0.0631385	0.159102	-0.396843	0.691484	0.882667
ENSG00000015171	3559.23	-0.323997	0.245516	-1.31966	0.186949	0.515534
ENSG00000015475	3288.8	0.152281	0.187694	0.81133	0.417176	0.725412
ENSG00000015479	69.0136	-0.33138	0.535234	-0.61913	0.535831	0.799165
ENSG00000015520	1611.89	0.200391	0.174223	1.1502	0.250062	0.583702
ENSG00000015532	611.737	-0.232942	0.249411	-0.933971	0.350319	0.672307
ENSG00000015676	3260.05	-0.0646907	0.132843	-0.48697	0.626279	0.849711
ENSG00000016082	62.298	0.763908	0.418653	1.82468	0.0680492	0.318472
ENSG00000016391	1827.8	0.141876	0.249308	0.56908	0.569302	0.820276
ENSG00000016864	543.127	0.20369	0.222505	0.915438	0.359962	0.680524
ENSG00000017260	5253.45	-0.348189	0.184635	-1.88582	0.0593186	0.294782
ENSG00000017797	6317.42	-0.453239	0.167017	-2.71372	0.00665315	0.0839839
ENSG00000018189	1333.56	-0.200401	0.158105	-1.26752	0.204969	0.539115
ENSG00000018408	344.6	-0.0273212	0.242526	-0.112653	0.910306	0.966323
ENSG00000018510	7423.38	-0.519376	0.17521	-2.96431	0.00303361	0.0513005
ENSG00000018610	1054.58	0.0818691	0.205609	0.39818	0.690498	0.882667
ENSG00000018699	707.434	-0.507643	0.234165	-2.16789	0.0301674	0.204749
ENSG00000018869	635.53	-0.1083	0.192843	-0.561598	0.57439	0.823405
ENSG00000019144	677.038	0.0373108	0.257887	0.144679	0.884964	0.957388
ENSG00000019485	155.622	0.0397026	0.236024	0.168214	0.866415	0.950206
ENSG00000019582	115.617	0.600323	0.334407	1.79519	0.0726238	0.330076
ENSG00000019995	2990.66	-0.12063	0.196527	-0.61381	0.539341	0.800277
ENSG00000020129	624.152	0.307483	0.242126	1.26993	0.204111	0.537574
ENSG00000020256	1356.77	-0.007035	0.168252	-0.0418123	0.966648	0.987881
ENSG00000020426	1067.88	-0.384622	0.183234	-2.09908	0.0358103	0.225608
ENSG00000020577	657.348	-0.00959732	0.281049	-0.0341483	0.972759	0.990334
ENSG00000020922	741.773	-0.380908	0.257385	-1.47991	0.138897	0.454312
ENSG00000021300	472.462	0.179685	0.281307	0.638752	0.522984	0.791542
ENSG00000021355	3783.64	-0.0648697	0.169771	-0.382101	0.702387	0.887607
ENSG00000021574	861.146	-0.286401	0.267321	-1.07138	0.284	0.616422
ENSG00000021645	100.926	1.12586	1.68703	0.667361	0.504542	0.781497
ENSG00000021776	1570.93	-0.382743	0.184913	-2.06985	0.0384663	0.235687
ENSG00000021826	131.552	-0.170335	0.322818	-0.52765	0.597742	0.835875
ENSG00000021852	158.804	-0.443722	0.273007	-1.62531	0.104096	0.391261
ENSG00000022277	3512.78	0.059654	0.162446	0.367223	0.713453	0.8923
ENSG00000022567	1059.73	0.267198	0.248744	1.07419	0.282738	0.615044
ENSG00000022840	8000.95	0.29863	0.248364	1.20239	0.229214	0.563464
ENSG00000022976	556.784	0.0369023	0.205821	0.179293	0.857708	0.947114
ENSG00000023041	4348.79	0.204891	0.160621	1.27562	0.202091	0.535054
ENSG00000023191	1265.88	0.44202	0.321578	1.37453	0.169276	0.492624
ENSG00000023228	4592.42	-0.364081	0.198087	-1.83798	0.0660646	0.312626
ENSG00000023287	1443.25	-0.58058	0.225944	-2.56958	0.0101823	0.111186
ENSG00000023318	2535.69	-0.300677	0.214628	-1.40092	0.161237	0.483149
ENSG00000023330	3795.43	0.105882	0.148843	0.711364	0.476859	0.762895
ENSG00000023445	122.997	-0.470024	0.938347	-0.500906	0.616437	0.843896
ENSG00000023516	1149.69	-0.4816	0.191482	-2.51512	0.0118992	0.121969
ENSG00000023572	897.015	-0.224701	0.229532	-0.978953	0.327603	0.654922
ENSG00000023608	301.176	-0.169011	0.257989	-0.65511	0.512397	0.785614
ENSG00000023697	5337.4	0.145554	0.182632	0.796979	0.425463	0.731852
ENSG00000023734	12485.4	0.0200376	0.203795	0.0983223	0.921676	0.969909
ENSG00000023839	9751.13	-0.31431	0.193381	-1.62534	0.10409	0.391261
ENSG00000023892	164.059	-0.473767	0.327782	-1.44537	0.148353	0.467208
ENSG00000023902	1268.06	0.197492	0.174509	1.1317	0.25776	0.590709
ENSG00000023909	5265.19	-0.139376	0.240404	-0.579756	0.562079	0.814876
ENSG00000024048	1072.73	-0.176499	0.225436	-0.782922	0.433673	0.735681
ENSG00000024526	3709.8	-0.367485	0.225189	-1.63189	0.102702	0.389035
ENSG00000024862	620.781	0.185062	0.1958	0.945159	0.344578	0.668335
ENSG00000025039	1620.12	0.0633496	0.180161	0.351627	0.725118	0.896549
ENSG00000025156	1204.93	-0.394824	0.205146	-1.9246	0.0542797	0.281048
ENSG00000025293	2338.62	-0.125578	0.162851	-0.771123	0.440634	0.740096
ENSG00000025423	60.3224	0.0501348	0.370346	0.135373	0.892317	0.959308
ENSG00000025434	1892.23	0.790586	0.212901	3.7134	0.000204496	0.00918149
ENSG00000025770	3681.26	0.431088	0.213642	2.01781	0.0436115	0.251402
ENSG00000025772	3785.06	0.293031	0.165611	1.76939	0.0768282	0.339119
ENSG00000025796	6660.11	-0.616602	0.159146	-3.87445	0.000106867	0.00584782
ENSG00000025800	3562.95	-0.406312	0.219143	-1.8541	0.063725	0.306762
ENSG00000026025	11889.3	-0.0125346	0.348476	-0.0359697	0.971307	0.989788
ENSG00000026297	153.736	0.664679	0.268648	2.47416	0.013355	0.129297
ENSG00000026508	58.6246	-0.134954	0.404342	-0.333763	0.738558	0.902646
ENSG00000026950	123.266	0.102135	0.353789	0.28869	0.772818	0.91632
ENSG00000027001	249.71	-0.535828	0.260972	-2.0532	0.0400534	0.239423
ENSG00000027697	1196.92	-0.752548	0.192379	-3.91181	9.16085e-05	0.00530919
ENSG00000027847	1448.66	0.454438	0.30985	1.46664	0.142474	0.459792
ENSG00000028116	1186.32	-0.270186	0.240033	-1.12562	0.260327	0.593063
ENSG00000028203	5065	-0.340921	0.185707	-1.8358	0.0663869	0.313362
ENSG00000028310	1365.13	-0.335502	0.176143	-1.90471	0.0568178	0.288673
ENSG00000028528	3309.42	-0.209898	0.178552	-1.17555	0.239774	0.574519
ENSG00000028839	1391.07	0.0456097	0.205896	0.221518	0.824689	0.938064
ENSG00000029153	3101.54	-0.0496253	0.315509	-0.157286	0.875019	0.953445
ENSG00000029363	4955.81	-0.680059	0.199896	-3.40206	0.000668803	0.020793
ENSG00000029364	5828.66	0.0444591	0.166509	0.267007	0.789464	0.924751
ENSG00000029559	130.638	-0.379235	0.271863	-1.39495	0.163031	0.485375
ENSG00000029639	1020.33	-0.0862083	0.190423	-0.452721	0.65075	0.862535
ENSG00000029725	4177.71	-0.462789	0.181363	-2.55173	0.010719	0.115227
ENSG00000029993	3847.86	0.0409841	0.211612	0.193676	0.84643	0.943014
ENSG00000030066	2149.73	-0.267748	0.173433	-1.54382	0.122633	0.427576
ENSG00000030110	1319.18	0.238091	0.189448	1.25676	0.208839	0.543815
ENSG00000030582	2071.45	-0.156503	0.30165	-0.518822	0.603885	0.838731
ENSG00000031003	1816.04	0.0343123	0.200659	0.170998	0.864225	0.950204
ENSG00000031691	701.759	-0.303763	0.224519	-1.35295	0.176071	0.502879
ENSG00000031698	2684.86	-0.80043	0.174879	-4.57704	4.716e-06	0.000815573
ENSG00000031823	3069.05	-0.0350788	0.178875	-0.196108	0.844526	0.942349
ENSG00000032219	1024.5	-0.635381	0.267168	-2.37821	0.0173968	0.150334
ENSG00000032389	1563.97	0.286239	0.177224	1.61513	0.106283	0.396554
ENSG00000032444	1004.43	0.373814	0.558972	0.668752	0.503653	0.780996
ENSG00000032742	429.387	-0.345023	0.17712	-1.94796	0.0514194	0.27361
ENSG00000033011	1096.55	-0.0787789	0.188489	-0.417949	0.675984	0.876063
ENSG00000033030	1916.56	-0.320713	0.203686	-1.57455	0.115361	0.414014
ENSG00000033050	2701.99	-0.317534	0.195888	-1.621	0.105018	0.393318
ENSG00000033100	880.279	0.369689	0.242706	1.5232	0.12771	0.436155
ENSG00000033170	430.663	-0.120207	0.229235	-0.524381	0.600013	0.837151
ENSG00000033178	1942.71	-0.435893	0.172951	-2.52032	0.0117248	0.120874
ENSG00000033327	592.971	-0.327411	0.210611	-1.55458	0.120046	0.42336
ENSG00000033627	2494.78	0.00958842	0.166857	0.057465	0.954175	0.983152
ENSG00000033800	3964.87	-0.155172	0.184478	-0.841143	0.400268	0.714742
ENSG00000033867	1820.29	-0.129442	0.230159	-0.562401	0.573843	0.823405
ENSG00000034053	137.62	-0.358269	0.277045	-1.29318	0.195949	0.527958
ENSG00000034152	1341.14	0.279207	0.238785	1.16928	0.24229	0.576181
ENSG00000034510	137372	0.235914	0.286852	0.822424	0.410836	0.721515
ENSG00000034533	593.399	0.241919	0.223364	1.08307	0.278778	0.610989
ENSG00000034677	1079.13	-0.36532	0.159286	-2.29348	0.0218206	0.171041
ENSG00000034693	658.319	0.0810093	0.204189	0.396737	0.691562	0.882667
ENSG00000034713	3713.9	-0.0402533	0.200909	-0.200356	0.841203	0.941605
ENSG00000035115	213.825	-0.0938578	0.233161	-0.402546	0.687283	0.881156
ENSG00000035141	14459.9	0.0509693	0.186386	0.273462	0.784498	0.922998
ENSG00000035403	2455.06	-0.27305	0.283197	-0.964168	0.334962	0.660612
ENSG00000035499	4391.76	-0.0340252	0.175322	-0.194072	0.846119	0.942778
ENSG00000035664	198.901	0.197783	0.284983	0.694018	0.487671	0.77061
ENSG00000035681	622.375	-0.367155	0.212717	-1.72602	0.0843431	0.35264
ENSG00000035687	3108.28	-0.569165	0.160592	-3.54418	0.000393843	0.0143082
ENSG00000035928	3245.71	-0.764451	0.195436	-3.91152	9.17163e-05	0.00530919
ENSG00000036054	1490.63	-0.52338	0.150598	-3.47534	0.000510203	0.0171438
ENSG00000036257	3968.41	-0.696658	0.175395	-3.97194	7.12883e-05	0.00450353
ENSG00000036549	4975.34	-0.264429	0.185134	-1.42831	0.153203	0.473962
ENSG00000036672	217.434	0.0820435	0.236533	0.346858	0.728698	0.898132
ENSG00000037042	623.507	0.0999422	0.23497	0.425341	0.670588	0.873843
ENSG00000037241	2045.72	0.0963539	0.196791	0.489626	0.624399	0.848831
ENSG00000037474	2928.12	-0.552056	0.185181	-2.98117	0.00287145	0.0496345
ENSG00000037637	2146.15	-0.0406223	0.203996	-0.199133	0.842158	0.941605
ENSG00000037749	1470.87	-0.180812	0.228229	-0.792239	0.428221	0.732933
ENSG00000037757	1221.39	0.736144	0.192749	3.81919	0.00013389	0.00691181
ENSG00000037897	2320.09	0.132695	0.182473	0.7272	0.467103	0.757967
ENSG00000037965	211.961	0.650492	0.217616	2.98917	0.00279736	0.0491136
ENSG00000038002	1205.12	0.119229	0.157944	0.754882	0.45032	0.747685
ENSG00000038210	2493.77	-0.0548753	0.223583	-0.245436	0.806119	0.93121
ENSG00000038219	2135.57	-0.828074	0.231555	-3.57614	0.000348701	0.0133267
ENSG00000038274	2967.61	0.0166077	0.164186	0.101152	0.91943	0.969004
ENSG00000038358	822.195	0.0469775	0.231943	0.202539	0.839495	0.941091
ENSG00000038382	1025.35	-0.58132	0.252432	-2.30288	0.0212859	0.167967
ENSG00000038427	731.373	0.00289003	0.278103	0.010392	0.991709	0.997021
ENSG00000038532	652.351	-0.222425	0.218295	-1.01892	0.308242	0.640282
ENSG00000038945	117.312	-0.0654259	0.316082	-0.20699	0.836017	0.940793
ENSG00000039068	1525.71	-0.0585645	0.18701	-0.313163	0.754157	0.908758
ENSG00000039123	2259.4	-0.311875	0.204024	-1.52861	0.12636	0.433042
ENSG00000039319	1750.12	-0.165387	0.205295	-0.805609	0.420468	0.727798
ENSG00000039523	1645.57	0.107842	0.267298	0.403452	0.686616	0.880873
ENSG00000039560	6238.14	-0.453417	0.160613	-2.82304	0.00475709	0.0677103
ENSG00000039650	841.779	0.137905	0.278404	0.49534	0.62036	0.846001
ENSG00000040199	1808.67	-0.586185	0.224174	-2.61486	0.00892642	0.101979
ENSG00000040275	4496.64	-0.631021	0.197227	-3.19947	0.00137681	0.0330698
ENSG00000040341	1754.86	-0.344152	0.153674	-2.23949	0.0251239	0.183969
ENSG00000040487	958.89	0.624055	0.225857	2.76306	0.00572628	0.0763494
ENSG00000040531	735.253	0.208409	0.174223	1.19623	0.231608	0.565809
ENSG00000040608	147.334	0.931955	1.00208	0.930018	0.352362	0.673704
ENSG00000040633	3031.78	0.242507	0.211933	1.14426	0.252514	0.585703
ENSG00000040933	1333.95	-0.0701866	0.181281	-0.387171	0.69863	0.886099
ENSG00000041353	162.831	-0.550463	0.297066	-1.853	0.0638824	0.307073
ENSG00000041357	21928.9	0.170393	0.199247	0.855185	0.392449	0.707655
ENSG00000041802	2225.78	-0.598912	0.205472	-2.91481	0.00355905	0.056338
ENSG00000041880	565.367	0.330301	0.182977	1.80515	0.0710511	0.325062
ENSG00000041988	750.394	0.29066	0.173812	1.67227	0.0944714	0.37167
ENSG00000042088	1384.51	-0.0934028	0.205067	-0.455476	0.648767	0.861639
ENSG00000042286	1565.08	0.0833002	0.271592	0.306711	0.759064	0.909944
ENSG00000042317	204.905	0.123169	0.243276	0.506293	0.612651	0.842826
ENSG00000042429	1185.74	0.121694	0.166657	0.730204	0.465265	0.756937
ENSG00000042445	1510.81	-0.190372	0.185575	-1.02585	0.304964	0.637699
ENSG00000042493	1181.57	0.292009	0.246074	1.18667	0.235357	0.570035
ENSG00000042753	6535.14	0.260869	0.206413	1.26382	0.206296	0.540447
ENSG00000042832	62.8871	0.878817	0.404772	2.17114	0.0299206	0.203917
ENSG00000043093	1585.61	-0.186856	0.216371	-0.863591	0.387812	0.704803
ENSG00000043143	1477.19	-0.183891	0.140322	-1.31049	0.190032	0.519685
ENSG00000043355	117.668	0.365036	0.432167	0.844665	0.398298	0.71257
ENSG00000043514	2163.5	-0.317069	0.187836	-1.68802	0.0914081	0.366008
ENSG00000044090	648.369	0.0375757	0.242996	0.154635	0.877109	0.954072
ENSG00000044115	3361.61	-0.479022	0.194016	-2.46899	0.0135497	0.130361
ENSG00000044446	789.567	-0.09007	0.199788	-0.450827	0.652114	0.863349
ENSG00000044459	1304.23	-0.725262	0.187365	-3.87085	0.000108455	0.00586123
ENSG00000044574	10861.6	-0.0894628	0.231609	-0.386267	0.699299	0.886099
ENSG00000046604	984.064	-0.398237	0.200522	-1.986	0.0470332	0.261958
ENSG00000046647	233.106	0.743487	0.211364	3.51757	0.000435512	0.0152539
ENSG00000046651	407.649	-0.109206	0.184011	-0.593474	0.552864	0.808688
ENSG00000047056	1092.81	-0.0237312	0.184267	-0.128787	0.897526	0.961237
ENSG00000047188	852.28	-0.125195	0.205328	-0.609733	0.542039	0.802368
ENSG00000047230	603.316	-0.404615	0.169866	-2.38197	0.0172205	0.149277
ENSG00000047249	306.606	-0.39923	0.210097	-1.90022	0.0574041	0.289954
ENSG00000047315	4043.83	-0.60462	0.175496	-3.44521	0.000570626	0.0185706
ENSG00000047346	594.287	-0.205209	0.182878	-1.12211	0.261814	0.593512
ENSG00000047410	2816.87	-0.68726	0.227524	-3.02061	0.0025227	0.0458121
ENSG00000047457	853.191	-0.323199	0.20988	-1.53992	0.12358	0.428597
ENSG00000047578	662.367	-0.374622	0.221006	-1.69508	0.0900611	0.363357
ENSG00000047579	76.3629	0.118643	0.316869	0.374423	0.70809	0.890241
ENSG00000047621	1548.17	-0.138878	0.175449	-0.791559	0.428618	0.732976
ENSG00000047634	79.182	0.00184287	0.43753	0.004212	0.996639	0.999037
ENSG00000047849	5425.01	-0.186593	0.168657	-1.10635	0.268575	0.599408
ENSG00000047932	1797.83	-0.453082	0.221819	-2.04257	0.0410947	0.243072
ENSG00000047936	249	-0.147248	0.301541	-0.488317	0.625325	0.849444
ENSG00000048028	1255.7	-0.675426	0.165871	-4.07201	4.66101e-05	0.0033412
ENSG00000048052	205.449	-0.557224	0.908192	-0.613553	0.539511	0.800443
ENSG00000048140	2093.35	0.139332	0.218346	0.638126	0.523392	0.791812
ENSG00000048162	3932.34	0.38438	0.182093	2.1109	0.0347807	0.221747
ENSG00000048342	411.972	0.109747	0.234048	0.468911	0.639133	0.857487
ENSG00000048392	955.818	-0.262266	0.208055	-1.26056	0.207466	0.541054
ENSG00000048405	590.387	0.00260091	0.186155	0.0139718	0.988853	0.995992
ENSG00000048471	254.075	-0.198372	0.200186	-0.990941	0.321714	0.65086
ENSG00000048540	203.478	0.367101	0.25082	1.46361	0.143301	0.460731
ENSG00000048544	4018.35	-0.213693	0.204355	-1.04569	0.295702	0.628542
ENSG00000048649	1132.13	-0.874108	0.205295	-4.25782	2.06428e-05	0.00196866
ENSG00000048707	844.696	-0.282107	0.296618	-0.951079	0.341564	0.665992
ENSG00000048828	8476.32	-0.250451	0.176394	-1.41984	0.155655	0.476856
ENSG00000048991	5162.32	-0.279571	0.152164	-1.8373	0.066166	0.312746
ENSG00000049089	249.62	0.388437	0.308283	1.26	0.20767	0.541484
ENSG00000049130	3093.51	-0.226876	0.204149	-1.11132	0.26643	0.597524
ENSG00000049167	2098.69	-0.125541	0.172539	-0.72761	0.466852	0.757967
ENSG00000049192	214.447	-0.104514	0.282574	-0.369863	0.711485	0.891531
ENSG00000049239	2521.74	-0.191319	0.240817	-0.794457	0.426929	0.732639
ENSG00000049245	9445.8	0.013295	0.20022	0.066402	0.947058	0.979923
ENSG00000049246	78.7516	-0.114242	0.408232	-0.279845	0.779597	0.920755
ENSG00000049323	184.425	-0.116603	0.418173	-0.278839	0.780368	0.921193
ENSG00000049449	773.09	-0.0533384	0.191568	-0.278431	0.780682	0.921329
ENSG00000049541	3419.48	-0.119183	0.165877	-0.718499	0.47245	0.760741
ENSG00000049618	2075.26	-0.171036	0.197526	-0.865888	0.386552	0.704185
ENSG00000049656	7156.45	0.20053	0.208835	0.960232	0.336939	0.662058
ENSG00000049759	2533.65	-0.371268	0.170856	-2.17299	0.0297808	0.203536
ENSG00000049769	255.018	0.211273	0.261653	0.807455	0.419405	0.726537
ENSG00000049860	2439.23	-0.408115	0.207635	-1.96554	0.0493512	0.269065
ENSG00000049883	1169.68	-0.216866	0.242007	-0.896115	0.370191	0.688568
ENSG00000050130	3456.38	0.15279	0.155395	0.983238	0.32549	0.652776
ENSG00000050165	357.772	0.0424035	0.308361	0.137513	0.890626	0.958877
ENSG00000050327	244.665	-0.311546	0.219646	-1.4184	0.156074	0.477304
ENSG00000050344	708.951	-0.421393	0.346971	-1.21449	0.224561	0.558536
ENSG00000050393	4604.42	-0.166678	0.178029	-0.936237	0.349151	0.67081
ENSG00000050405	795.327	-0.520925	0.234881	-2.21782	0.0265668	0.189971
ENSG00000050426	3218.56	0.0672495	0.242667	0.277126	0.781683	0.921802
ENSG00000050748	4468.57	0.0247198	0.203981	0.121187	0.903543	0.963577
ENSG00000050820	1721.08	0.211466	0.373053	0.566854	0.570813	0.821491
ENSG00000051009	696.412	0.331897	0.19471	1.70457	0.0882746	0.359835
ENSG00000051108	3185.88	-0.0594933	0.294357	-0.202112	0.839829	0.941091
ENSG00000051128	305.789	0.362132	0.28943	1.25119	0.210865	0.546211
ENSG00000051180	940.848	0.164884	0.227156	0.725862	0.467923	0.758446
ENSG00000051341	2414.57	-0.427247	0.200697	-2.12881	0.0332698	0.216504
ENSG00000051382	3878.9	-0.419031	0.172185	-2.4336	0.0149493	0.137882
ENSG00000051523	4585.38	0.884116	0.511607	1.72812	0.0839674	0.351928
ENSG00000051596	726.263	0.409804	0.188063	2.17908	0.0293259	0.201853
ENSG00000051620	5479.88	-0.211187	0.196149	-1.07667	0.281629	0.6135
ENSG00000051825	1908.04	-0.27321	0.173934	-1.57076	0.116237	0.415343
ENSG00000052126	3424.78	-0.553659	0.151331	-3.6586	0.000253595	0.0106641
ENSG00000052723	5710.94	0.052669	0.163745	0.321653	0.747716	0.905474
ENSG00000052749	1054.57	-0.0492181	0.241786	-0.20356	0.838697	0.941091
ENSG00000052795	3079.48	-0.323732	0.134122	-2.41371	0.0157909	0.141862
ENSG00000052802	25609.6	-0.325526	0.201925	-1.61211	0.106937	0.397709
ENSG00000052841	2726.28	-0.587848	0.133841	-4.39212	1.12251e-05	0.00137049
ENSG00000053254	3778.27	-0.245876	0.160604	-1.53094	0.125783	0.432372
ENSG00000053328	57.7081	-0.0560617	0.39654	-0.141377	0.887572	0.957897
ENSG00000053371	1598.36	0.332092	0.164924	2.01361	0.0440504	0.252669
ENSG00000053372	6140.87	0.128358	0.16256	0.789608	0.429757	0.733954
ENSG00000053501	1029.78	0.250376	0.211037	1.18641	0.235462	0.570112
ENSG00000053747	198.666	-0.111956	0.85178	-0.131438	0.895429	0.960181
ENSG00000053770	3127.03	-0.0806079	0.160462	-0.502348	0.615423	0.843509
ENSG00000053900	2398.62	-0.586523	0.193368	-3.03319	0.0024198	0.0446701
ENSG00000054116	4433.37	0.155755	0.199403	0.781108	0.434739	0.736183
ENSG00000054118	4681.37	0.0482148	0.220063	0.219096	0.826575	0.938407
ENSG00000054148	10888.2	0.486942	0.26524	1.83586	0.0663789	0.313362
ENSG00000054267	1855.65	-0.708898	0.197351	-3.59206	0.000328072	0.0128945
ENSG00000054277	6667.94	-0.140336	0.289265	-0.485146	0.627573	0.850306
ENSG00000054282	738.917	-0.41075	0.199612	-2.05774	0.0396151	0.239036
ENSG00000054523	2291.42	-0.41609	0.187505	-2.21908	0.0264813	0.189769
ENSG00000054611	1014.01	0.216691	0.213096	1.01687	0.309216	0.641089
ENSG00000054654	268.166	-0.404987	0.383386	-1.05634	0.290812	0.62327
ENSG00000054690	505.689	-0.416902	0.227989	-1.8286	0.0674595	0.316862
ENSG00000054793	2267.85	-0.177172	0.169247	-1.04683	0.29518	0.628086
ENSG00000054965	1681.7	-0.000946982	0.206408	-0.0045879	0.996339	0.999037
ENSG00000054967	447.737	0.259101	0.204398	1.26763	0.20493	0.539115
ENSG00000054983	1145.77	-0.211679	0.26292	-0.805105	0.420759	0.728196
ENSG00000055044	8074.6	-0.220719	0.178512	-1.23643	0.216297	0.550533
ENSG00000055070	18477.2	0.0188631	0.165611	0.1139	0.909317	0.96594
ENSG00000055130	3457.55	-0.492836	0.174955	-2.81694	0.00484841	0.0685775
ENSG00000055147	795.476	-0.0253934	0.178109	-0.142572	0.886628	0.957772
ENSG00000055208	4135.74	-0.0179991	0.163437	-0.110129	0.912307	0.966963
ENSG00000055211	995.817	-0.144589	0.16906	-0.855253	0.392411	0.707655
ENSG00000055332	489.366	-0.685546	0.239565	-2.86162	0.00421477	0.0624194
ENSG00000055483	1866.3	-0.0958101	0.16215	-0.590872	0.554606	0.809386
ENSG00000055609	1407.27	-0.256782	0.227022	-1.13109	0.258017	0.591005
ENSG00000055732	84.4228	0.00713697	0.346608	0.0205909	0.983572	0.994716
ENSG00000055917	5699.9	-0.152073	0.167551	-0.90762	0.364079	0.68308
ENSG00000055950	2582.91	0.296506	0.199164	1.48876	0.136552	0.451097
ENSG00000055957	91.0002	0.124198	0.539989	0.23	0.818091	0.935889
ENSG00000056050	947.384	0.0197065	0.199176	0.0989403	0.921186	0.969564
ENSG00000056097	3825.15	-0.291746	0.180871	-1.61301	0.106743	0.397201
ENSG00000056277	485.519	-0.0825766	0.188596	-0.437848	0.661496	0.868741
ENSG00000056558	129.211	0.324546	0.453136	0.716223	0.473854	0.761366
ENSG00000056586	4575.97	-0.224671	0.184946	-1.21479	0.224445	0.558536
ENSG00000056736	2543.26	0.262409	0.183541	1.4297	0.152803	0.47336
ENSG00000056972	243.778	0.0520098	0.265477	0.195911	0.84468	0.942354
ENSG00000056998	3195.92	-0.0697348	0.201202	-0.346591	0.728899	0.898177
ENSG00000057019	3074.73	-0.0432979	0.167914	-0.257857	0.796517	0.927837
ENSG00000057252	2819.04	-0.332212	0.147836	-2.24717	0.0246291	0.182021
ENSG00000057294	2063.76	-0.490435	0.226878	-2.16167	0.0306437	0.20701
ENSG00000057593	1102.22	0.115779	0.258746	0.447462	0.654542	0.864908
ENSG00000057608	11171.3	-0.405431	0.183025	-2.21517	0.0267483	0.190362
ENSG00000057657	302.145	-0.0457437	0.374873	-0.122024	0.90288	0.963243
ENSG00000057663	3985.01	0.174644	0.177904	0.981672	0.326261	0.653515
ENSG00000057704	668.585	-0.0742258	0.16809	-0.441584	0.658791	0.867539
ENSG00000057757	2620.39	0.348873	0.170231	2.0494	0.0404227	0.240744
ENSG00000057935	1227.47	-0.263781	0.136915	-1.92661	0.0540286	0.280509
ENSG00000058056	1516.27	-0.357504	0.168084	-2.12693	0.0334256	0.217211
ENSG00000058063	2512.95	-0.228017	0.212202	-1.07453	0.282586	0.614905
ENSG00000058091	2224.16	-0.220017	0.243619	-0.903118	0.366463	0.685601
ENSG00000058262	19196.3	-0.0348146	0.169652	-0.205211	0.837407	0.941091
ENSG00000058272	1731.13	-0.546871	0.232179	-2.35539	0.0185034	0.155999
ENSG00000058453	84.7019	0.248182	0.520844	0.4765	0.633718	0.853865
ENSG00000058600	1990.79	-0.0782124	0.139573	-0.56037	0.575227	0.823953
ENSG00000058668	735.238	-0.287291	0.164245	-1.74916	0.0802628	0.34678
ENSG00000058673	6290.97	0.220499	0.180998	1.21824	0.223131	0.556955
ENSG00000058729	1110.07	-0.7034	0.197032	-3.56998	0.000357009	0.0134908
ENSG00000058799	1225.1	0.183553	0.21475	0.854728	0.392702	0.707886
ENSG00000058804	7398.17	-0.140655	0.212414	-0.662174	0.50786	0.783069
ENSG00000059122	530.026	0.306565	0.31583	0.970665	0.331715	0.657211
ENSG00000059145	1659.82	0.337003	0.165161	2.04045	0.0413058	0.243591
ENSG00000059377	74.8622	0.245051	0.369276	0.663599	0.506947	0.782333
ENSG00000059378	695.423	-0.186834	0.203518	-0.91802	0.358608	0.679568
ENSG00000059573	5197.64	-0.222665	0.159296	-1.39781	0.162171	0.484065
ENSG00000059588	1164.8	-0.314987	0.197831	-1.5922	0.11134	0.406422
ENSG00000059691	884.144	-0.476176	0.170637	-2.79058	0.00526138	0.0725011
ENSG00000059728	979.787	0.34245	0.233596	1.466	0.142649	0.459944
ENSG00000059758	1269.2	-0.280875	0.169055	-1.66144	0.096625	0.375613
ENSG00000059769	1852.4	-0.130715	0.158388	-0.825283	0.409211	0.720663
ENSG00000060069	351.533	-0.4605	0.286391	-1.60794	0.107848	0.399271
ENSG00000060138	5257.31	0.960705	0.266329	3.60721	0.000309505	0.0123046
ENSG00000060237	7716.16	-0.227104	0.161555	-1.40574	0.159803	0.482156
ENSG00000060303	164.137	0.531263	0.26502	2.00461	0.0450044	0.25585
ENSG00000060339	4122.81	-0.75707	0.200577	-3.77446	0.000160354	0.00775698
ENSG00000060491	1811.57	0.303176	0.268976	1.12715	0.25968	0.592263
ENSG00000060566	2082.11	0.0240554	0.258278	0.0931379	0.925794	0.971361
ENSG00000060642	611.59	0.169263	0.215241	0.786386	0.431641	0.734796
ENSG00000060656	620.63	0.297263	0.26482	1.12251	0.261645	0.593436
ENSG00000060688	5769.23	-0.0663597	0.167482	-0.39622	0.691942	0.882957
ENSG00000060718	52.7785	-1.2215	0.637282	-1.91673	0.0552723	0.284378
ENSG00000060749	2122.48	-0.472012	0.201851	-2.33841	0.0193658	0.160316
ENSG00000060762	8294.03	0.210045	0.153116	1.3718	0.170125	0.493585
ENSG00000060971	5935.62	0.316675	0.218227	1.45113	0.146744	0.464245
ENSG00000060982	5922.32	-0.470938	0.228184	-2.06385	0.0390321	0.23768
ENSG00000061273	1350.44	0.202787	0.247813	0.818307	0.413182	0.72274
ENSG00000061455	48.0972	-0.222007	0.451255	-0.491976	0.622736	0.847821
ENSG00000061656	86.9435	0.798118	0.840389	0.9497	0.342265	0.666277
ENSG00000061676	6957.91	-0.406819	0.190477	-2.13579	0.0326963	0.214284
ENSG00000061794	7834.61	-0.0712136	0.17048	-0.417723	0.67615	0.876063
ENSG00000061936	1281.3	-0.617627	0.150362	-4.1076	3.99788e-05	0.0029836
ENSG00000061938	88.8725	-0.0480697	0.4396	-0.109349	0.912926	0.967051
ENSG00000061987	1521.17	-0.249399	0.223097	-1.1179	0.26361	0.595534
ENSG00000062194	4839.29	-0.174624	0.179105	-0.974985	0.329568	0.656077
ENSG00000062282	4469.83	0.138532	0.189076	0.732681	0.463753	0.755547
ENSG00000062370	424.805	-0.315338	0.26949	-1.17013	0.241949	0.576181
ENSG00000062485	7905.33	-0.0322525	0.179194	-0.179987	0.857163	0.946814
ENSG00000062582	52.0307	-0.277694	0.499749	-0.555667	0.578439	0.824426
ENSG00000062598	1395.47	-0.431711	0.161102	-2.67974	0.00736786	0.0898
ENSG00000062650	3491.03	-0.667531	0.257303	-2.59434	0.00947741	0.105913
ENSG00000062716	8662.13	0.297471	0.209336	1.42102	0.15531	0.476435
ENSG00000062725	1472.26	-0.345386	0.201537	-1.71376	0.0865726	0.356574
ENSG00000062822	898.613	-0.0495193	0.350638	-0.141226	0.887691	0.957897
ENSG00000063046	28237	-0.38304	0.193842	-1.97605	0.0481496	0.265716
ENSG00000063127	127.56	-0.56596	0.393847	-1.437	0.150717	0.470906
ENSG00000063169	557.923	-0.110622	0.288391	-0.383581	0.701289	0.886956
ENSG00000063176	568.432	0.604843	0.386007	1.56692	0.117133	0.416483
ENSG00000063177	57222.5	0.925881	0.253968	3.64565	0.000266713	0.011081
ENSG00000063180	70.5184	0.576278	0.559316	1.03033	0.302857	0.636065
ENSG00000063241	4135.85	0.639293	0.279362	2.28841	0.0221138	0.172169
ENSG00000063244	6956.28	0.239224	0.162088	1.47589	0.139973	0.455896
ENSG00000063245	4719.31	0.386572	0.35939	1.07564	0.28209	0.614215
ENSG00000063322	3671.97	0.162493	0.141457	1.14871	0.250678	0.58421
ENSG00000063587	467.223	0.02747	0.217359	0.126381	0.89943	0.96216
ENSG00000063601	905.009	-0.189852	0.171342	-1.10803	0.267849	0.598809
ENSG00000063761	275.579	0.0452953	0.216801	0.208926	0.834506	0.940786
ENSG00000063854	1376.37	0.224804	0.217084	1.03556	0.300406	0.633621
ENSG00000063978	6116.74	0.165159	0.156196	1.05738	0.290339	0.622592
ENSG00000064012	769.265	0.42769	0.211764	2.01965	0.0434195	0.250862
ENSG00000064042	517.126	-0.233774	0.22965	-1.01796	0.308698	0.640498
ENSG00000064102	2368.29	-0.583974	0.19565	-2.98479	0.00283776	0.0494345
ENSG00000064115	6150.97	-0.20242	0.167086	-1.21147	0.225716	0.559552
ENSG00000064199	222.975	0.0852864	0.230743	0.369616	0.711669	0.8916
ENSG00000064225	3125.76	-0.0550383	0.15959	-0.344872	0.73019	0.898701
ENSG00000064309	250.081	-0.0101959	0.244034	-0.0417807	0.966673	0.987881
ENSG00000064313	1998.92	-0.567367	0.185566	-3.0575	0.00223194	0.0427757
ENSG00000064393	3907.55	-0.16522	0.210162	-0.786156	0.431776	0.734796
ENSG00000064419	5370.48	-0.502834	0.175137	-2.87109	0.00409062	0.0612487
ENSG00000064490	1874.59	1.14295	0.207861	5.49862	3.82766e-08	5.88396e-05
ENSG00000064545	1583.87	0.34149	0.355456	0.96071	0.336698	0.662055
ENSG00000064601	4051.36	0.0800375	0.236815	0.337975	0.735382	0.900929
ENSG00000064607	6796.35	0.0726627	0.237956	0.305361	0.760091	0.910543
ENSG00000064651	1599.44	-0.344424	0.600756	-0.573317	0.56643	0.818327
ENSG00000064652	1344.31	-0.0953935	0.22192	-0.429856	0.667301	0.872173
ENSG00000064666	7122.01	0.098363	0.232395	0.423258	0.672107	0.874175
ENSG00000064687	178.141	0.496301	0.460474	1.07781	0.281121	0.613127
ENSG00000064692	1218.71	-0.278681	0.208177	-1.33868	0.180676	0.50782
ENSG00000064703	1896.6	-0.395485	0.191952	-2.06033	0.0393668	0.238249
ENSG00000064726	6203.35	0.0258571	0.170932	0.151271	0.879762	0.955407
ENSG00000064787	50.7506	-0.967309	0.604717	-1.59961	0.109686	0.403266
ENSG00000064932	1156.37	0.115763	0.376032	0.307854	0.758193	0.909874
ENSG00000064933	1563.96	-0.0924104	0.157326	-0.587383	0.556946	0.810945
ENSG00000064961	1977.83	0.79554	0.285247	2.78895	0.00528792	0.0726967
ENSG00000064995	3067.31	0.118064	0.163062	0.724045	0.469038	0.759144
ENSG00000064999	498.32	-0.105069	0.196813	-0.533854	0.593442	0.833954
ENSG00000065000	4166.12	-0.385673	0.320641	-1.20282	0.229046	0.563389
ENSG00000065029	1841.26	0.193327	0.139351	1.38733	0.165341	0.488884
ENSG00000065054	505.722	0.62963	0.575762	1.09356	0.274148	0.605015
ENSG00000065057	408.791	0.865688	0.351211	2.46486	0.0137066	0.131051
ENSG00000065060	1968.73	-0.513876	0.195502	-2.62849	0.00857642	0.099159
ENSG00000065135	4533.87	-0.176127	0.212369	-0.829343	0.40691	0.71907
ENSG00000065150	8402.3	-0.368759	0.187993	-1.96156	0.0498137	0.269786
ENSG00000065154	2638.19	-0.511303	0.19508	-2.62099	0.00876747	0.100495
ENSG00000065183	2023.55	-0.635437	0.196653	-3.23125	0.00123249	0.0309464
ENSG00000065243	2192.64	-0.721199	0.182952	-3.94202	8.07979e-05	0.00492459
ENSG00000065268	1294.7	0.710414	0.34759	2.04383	0.0409707	0.24265
ENSG00000065308	2922.34	-0.0325712	0.205539	-0.158467	0.874089	0.953031
ENSG00000065320	189.259	-0.159713	0.316097	-0.505265	0.613373	0.842826
ENSG00000065325	58.1172	-0.24899	0.525121	-0.474158	0.635387	0.854694
ENSG00000065328	2295.78	-0.390775	0.188265	-2.07566	0.037925	0.23418
ENSG00000065357	114.284	-0.0870432	0.291132	-0.298982	0.764954	0.912969
ENSG00000065361	8155.76	-0.155607	0.133212	-1.16811	0.242762	0.576784
ENSG00000065413	92.6787	0.0864237	0.357996	0.241409	0.809238	0.932285
ENSG00000065427	13404.3	-0.536585	0.211696	-2.53469	0.0112546	0.118754
ENSG00000065457	1356.65	0.25003	0.210067	1.19024	0.233953	0.569148
ENSG00000065485	2800.96	-0.266822	0.146267	-1.82422	0.0681189	0.318602
ENSG00000065491	901.773	-0.257822	0.149227	-1.72772	0.0840383	0.352084
ENSG00000065518	13733.1	0.0950846	0.209795	0.453226	0.650386	0.862381
ENSG00000065526	2930.91	-0.419202	0.221333	-1.89398	0.0582271	0.291691
ENSG00000065534	514.368	-0.192342	0.313319	-0.613886	0.53929	0.800277
ENSG00000065548	7208.03	-0.404594	0.192474	-2.10207	0.035547	0.22475
ENSG00000065559	3318.85	-0.0848418	0.190456	-0.445466	0.655983	0.865753
ENSG00000065600	471.489	0.175279	0.215997	0.811487	0.417086	0.725412
ENSG00000065613	946.883	-0.8052	0.245144	-3.28459	0.0010213	0.027383
ENSG00000065615	1308.47	-0.0560901	0.260699	-0.215153	0.829648	0.939679
ENSG00000065621	95.1245	0.387397	0.385677	1.00446	0.315156	0.644829
ENSG00000065665	351.361	0.273331	0.220503	1.23958	0.215132	0.549955
ENSG00000065717	268.826	0.258326	0.400726	0.644646	0.519157	0.788855
ENSG00000065802	2834.1	-0.115198	0.215394	-0.534825	0.592771	0.833603
ENSG00000065809	7574.97	-0.132771	0.302215	-0.439327	0.660424	0.868633
ENSG00000065833	4431.67	-0.607016	0.203063	-2.98929	0.00279627	0.0491136
ENSG00000065882	6334.74	-0.138992	0.130094	-1.06839	0.285343	0.61726
ENSG00000065883	1637.96	-0.0742775	0.156712	-0.473974	0.635518	0.854694
ENSG00000065911	4192.43	-0.0355166	0.235817	-0.150611	0.880283	0.95553
ENSG00000065923	339.177	-0.0529817	0.2739	-0.193434	0.846619	0.943126
ENSG00000065970	216.796	-0.492096	0.22834	-2.15511	0.0311534	0.208619
ENSG00000065978	147225	1.08318	0.200262	5.40881	6.34433e-08	7.1912e-05
ENSG00000065989	513.393	0.143815	0.289094	0.497466	0.61886	0.845086
ENSG00000066027	2072.69	-0.123493	0.140707	-0.877659	0.380129	0.698823
ENSG00000066044	4631.37	0.0710574	0.151014	0.470535	0.637973	0.856512
ENSG00000066084	4060.07	-0.210513	0.164518	-1.27958	0.200693	0.534059
ENSG00000066117	8891.61	-0.00971266	0.161751	-0.0600471	0.952118	0.982285
ENSG00000066135	2347.08	-0.317264	0.139385	-2.27617	0.0228357	0.174548
ENSG00000066136	2645.49	0.303347	0.160837	1.88605	0.0592882	0.294737
ENSG00000066248	849.349	0.171663	0.220022	0.780205	0.43527	0.736632
ENSG00000066279	5813.01	-0.430338	0.269695	-1.59565	0.110568	0.404654
ENSG00000066322	5012.98	0.223373	0.169225	1.31998	0.186842	0.515366
ENSG00000066379	771.739	0.639517	0.23466	2.72529	0.00642452	0.0822982
ENSG00000066382	63.3237	0.198342	0.356054	0.557056	0.577489	0.824426
ENSG00000066422	1428.04	-0.180672	0.228269	-0.791487	0.42866	0.732976
ENSG00000066427	552.235	-0.302664	0.208413	-1.45223	0.146437	0.464136
ENSG00000066455	2283.13	-0.239784	0.185569	-1.29216	0.196302	0.528477
ENSG00000066557	2155.55	-0.482457	0.194223	-2.48404	0.0129902	0.127506
ENSG00000066583	4921.82	0.0554689	0.156732	0.353909	0.723407	0.895717
ENSG00000066629	443.875	-0.559145	0.266004	-2.10202	0.0355516	0.22475
ENSG00000066651	1095.84	-0.275014	0.175257	-1.5692	0.116602	0.415888
ENSG00000066654	1895.74	-0.376047	0.169592	-2.21737	0.026598	0.189976
ENSG00000066697	1788.47	0.197075	0.316949	0.621789	0.534081	0.798334
ENSG00000066739	861.875	-0.214019	0.199754	-1.07141	0.283984	0.616422
ENSG00000066777	2337.86	-0.580128	0.185399	-3.12908	0.00175357	0.0376472
ENSG00000066813	150.341	-0.278664	0.3854	-0.723052	0.469648	0.759241
ENSG00000066827	237.431	-0.105591	0.258439	-0.408571	0.682855	0.879064
ENSG00000066855	6919.87	-0.18781	0.176213	-1.06581	0.286509	0.618385
ENSG00000066926	1622.51	-0.108511	0.211758	-0.512429	0.608351	0.840309
ENSG00000066933	897.589	-0.383863	0.206432	-1.85951	0.0629548	0.304612
ENSG00000067064	26999	0.0599079	0.201109	0.297887	0.765789	0.91333
ENSG00000067066	315.436	-0.726494	0.262348	-2.76921	0.00561932	0.0757065
ENSG00000067082	3424.88	0.305955	0.254059	1.20427	0.228486	0.562974
ENSG00000067113	470.768	0.0853914	0.231887	0.368246	0.71269	0.89191
ENSG00000067141	994.009	-0.306082	0.137416	-2.22742	0.025919	0.187253
ENSG00000067167	16215.5	-0.162761	0.260539	-0.624709	0.532162	0.797394
ENSG00000067182	2841.14	0.298879	0.190163	1.5717	0.116021	0.415141
ENSG00000067191	168.291	0.190023	0.270696	0.70198	0.482692	0.766358
ENSG00000067208	1386.32	-0.240837	0.169944	-1.41716	0.156437	0.477773
ENSG00000067221	229.142	0.725142	0.32469	2.23333	0.0255269	0.1858
ENSG00000067225	20203.9	-0.675448	0.15631	-4.3212	1.55182e-05	0.00165204
ENSG00000067248	1169.07	-0.484116	0.222247	-2.17828	0.0293854	0.20186
ENSG00000067334	3872.78	-0.459962	0.144474	-3.18371	0.00145402	0.0338625
ENSG00000067365	1365.17	0.108706	0.182168	0.596736	0.550684	0.807444
ENSG00000067369	665.69	-0.357333	0.20472	-1.74547	0.0809026	0.347173
ENSG00000067533	4681.41	-0.249856	0.168454	-1.48323	0.138014	0.453024
ENSG00000067560	22534.7	0.45196	0.201046	2.24804	0.0245736	0.182021
ENSG00000067596	1763.08	-0.283584	0.216315	-1.31098	0.189866	0.519685
ENSG00000067704	4917.91	-0.716064	0.234406	-3.0548	0.00225213	0.0429176
ENSG00000067715	623.348	-0.261102	0.224012	-1.16557	0.243787	0.578454
ENSG00000067798	45.9837	-0.361428	0.575722	-0.627782	0.530147	0.796036
ENSG00000067829	919.014	-0.112805	0.186825	-0.603799	0.545977	0.805128
ENSG00000067836	438.426	1.01203	0.27495	3.68077	0.000232534	0.00992935
ENSG00000067900	3299.99	-0.874028	0.195553	-4.46952	7.83964e-06	0.00111816
ENSG00000067955	2453.91	0.193194	0.284885	0.678147	0.497679	0.776674
ENSG00000067992	164.729	-0.032263	0.278948	-0.11566	0.907922	0.96581
ENSG00000068001	3589.83	0.443272	0.272209	1.62843	0.103434	0.390161
ENSG00000068024	577.326	-0.216108	0.217761	-0.992409	0.320998	0.649956
ENSG00000068028	2781.85	0.529296	0.171476	3.08671	0.00202385	0.0402877
ENSG00000068078	6578.6	0.159699	0.260821	0.612292	0.540344	0.801116
ENSG00000068079	71.7775	-0.474362	0.368949	-1.28571	0.198544	0.531059
ENSG00000068097	1253.46	-0.132061	0.197099	-0.670022	0.502843	0.780265
ENSG00000068120	4154.35	0.332998	0.173973	1.91408	0.0556104	0.285269
ENSG00000068137	272.256	0.831205	0.375017	2.21645	0.0266609	0.190131
ENSG00000068305	2933.72	-0.223192	0.147192	-1.51633	0.129436	0.439124
ENSG00000068308	3749.43	-0.119471	0.152911	-0.781311	0.43462	0.736183
ENSG00000068323	9007.26	0.143576	0.117907	1.21771	0.223335	0.557234
ENSG00000068354	1536.33	0.273646	0.160945	1.70024	0.0890851	0.361541
ENSG00000068366	6743.84	-0.428614	0.195539	-2.19197	0.0283818	0.197616
ENSG00000068383	3297.33	-0.0744793	0.228422	-0.32606	0.744379	0.904079
ENSG00000068394	1578.59	-0.610494	0.132858	-4.5951	4.32548e-06	0.000757506
ENSG00000068400	2292.25	-0.360669	0.234944	-1.53512	0.124753	0.430522
ENSG00000068438	4544.45	0.252614	0.169093	1.49394	0.135191	0.4495
ENSG00000068489	3779.52	-0.198527	0.208072	-0.954125	0.340021	0.664245
ENSG00000068615	141.275	0.182411	0.374393	0.48722	0.626103	0.849645
ENSG00000068650	2588.5	-0.187227	0.194591	-0.962156	0.335971	0.66119
ENSG00000068654	2558.85	-0.219372	0.227464	-0.964424	0.334833	0.660612
ENSG00000068697	7100.65	0.273061	0.221399	1.23335	0.217447	0.551996
ENSG00000068724	703.239	-0.00838188	0.214298	-0.0391133	0.9688	0.989026
ENSG00000068745	6960.02	0.638361	0.210409	3.0339	0.00241413	0.0446701
ENSG00000068784	840.096	-0.422118	0.187576	-2.25039	0.0244243	0.181274
ENSG00000068796	2282.5	-0.448866	0.24318	-1.84582	0.0649189	0.309499
ENSG00000068831	528.859	0.249492	0.35387	0.705039	0.480786	0.764956
ENSG00000068878	7082.83	-0.393699	0.189534	-2.0772	0.0377835	0.233637
ENSG00000068885	709.859	-0.12132	0.177646	-0.68293	0.494651	0.774677
ENSG00000068903	1868.29	0.20617	0.204071	1.01029	0.312359	0.642982
ENSG00000068912	5015.35	0.0387343	0.231441	0.167362	0.867086	0.950304
ENSG00000068971	293.859	0.661413	0.3239	2.04203	0.0411486	0.243206
ENSG00000069011	157.453	0.824283	0.480373	1.71592	0.0861765	0.35601
ENSG00000069020	475.807	0.170322	0.239116	0.712297	0.476281	0.76266
ENSG00000069248	2501.09	-0.359813	0.159674	-2.25342	0.0242328	0.180441
ENSG00000069275	28077.2	-0.0160908	0.211412	-0.0761111	0.939331	0.976776
ENSG00000069329	3526.08	-0.847696	0.176074	-4.81442	1.47631e-06	0.00035833
ENSG00000069345	1646.23	-0.590981	0.182338	-3.24112	0.0011906	0.030115
ENSG00000069399	1515.79	0.373552	0.242304	1.54167	0.123154	0.428206
ENSG00000069424	189.102	0.540642	0.240908	2.24419	0.0248204	0.182901
ENSG00000069482	217.255	0.322139	0.289417	1.11306	0.265683	0.597088
ENSG00000069493	210.965	-0.280364	0.357153	-0.784997	0.432455	0.735248
ENSG00000069509	1786.76	0.118554	0.205319	0.577414	0.56366	0.815967
ENSG00000069535	2824.42	-0.587223	0.265135	-2.21481	0.0267733	0.190441
ENSG00000069667	146.795	-0.0436661	0.274436	-0.159112	0.873581	0.953019
ENSG00000069702	1706.38	-0.0726765	0.170416	-0.426464	0.66977	0.873599
ENSG00000069712	98.5152	-0.271403	0.341144	-0.795568	0.426283	0.732232
ENSG00000069849	8302.96	0.0459215	0.198007	0.231919	0.816601	0.93512
ENSG00000069869	1818.25	-0.545895	0.160656	-3.39791	0.000679032	0.020923
ENSG00000069943	557.315	-0.0972903	0.181585	-0.535784	0.592108	0.833252
ENSG00000069956	11022	-0.270843	0.188665	-1.43557	0.151125	0.471426
ENSG00000069966	1272.48	0.128303	0.155702	0.824028	0.409924	0.721348
ENSG00000069974	910.255	-0.0855141	0.235539	-0.363056	0.716563	0.894239
ENSG00000069998	3441.35	0.0433726	0.160698	0.269902	0.787236	0.924197
ENSG00000070010	6402.88	0.134964	0.196687	0.686184	0.492597	0.773852
ENSG00000070018	3405.36	-0.508309	0.21277	-2.389	0.0168941	0.147368
ENSG00000070019	907.756	-0.356495	0.178217	-2.00034	0.0454635	0.257149
ENSG00000070047	623.459	-0.141545	0.356618	-0.39691	0.691434	0.882667
ENSG00000070061	8670.94	0.162387	0.166706	0.974096	0.330009	0.656086
ENSG00000070081	935.128	-0.536578	0.207094	-2.59099	0.00957014	0.106691
ENSG00000070087	6748.89	0.167926	0.165299	1.01589	0.30968	0.641275
ENSG00000070159	3392.61	-0.317399	0.181578	-1.748	0.0804636	0.34678
ENSG00000070214	7162.58	-0.0225205	0.121252	-0.185733	0.852654	0.945534
ENSG00000070269	1290.99	-0.0245318	0.181935	-0.134838	0.89274	0.959308
ENSG00000070366	826.865	-0.117748	0.155316	-0.758119	0.44838	0.746154
ENSG00000070367	3900.14	-0.297338	0.19019	-1.56337	0.117965	0.418581
ENSG00000070371	504.389	-0.11499	0.220962	-0.520405	0.602781	0.83828
ENSG00000070404	756.325	0.432535	0.35189	1.22917	0.219007	0.553992
ENSG00000070413	3133.64	0.370037	0.207588	1.78256	0.0746581	0.334162
ENSG00000070423	2556.67	0.426973	0.380151	1.12317	0.261366	0.593431
ENSG00000070444	747.784	0.0480472	0.27115	0.177198	0.859353	0.948098
ENSG00000070476	1425.84	-0.480095	0.257685	-1.8631	0.0624476	0.303571
ENSG00000070495	1407.99	-0.122314	0.221511	-0.552182	0.580824	0.826038
ENSG00000070501	2790.55	0.0305073	0.260411	0.11715	0.906741	0.965229
ENSG00000070540	1920.27	0.0132822	0.182021	0.0729704	0.94183	0.977951
ENSG00000070610	4492.44	0.271359	0.152602	1.77822	0.0753681	0.335908
ENSG00000070614	4311.4	-0.00405272	0.140292	-0.0288878	0.976954	0.991794
ENSG00000070669	2354.28	-0.181038	0.247005	-0.73293	0.463601	0.755547
ENSG00000070718	797.686	-0.131471	0.224813	-0.584799	0.558683	0.812023
ENSG00000070756	73852.3	0.0362169	0.244421	0.148175	0.882205	0.956519
ENSG00000070759	552.648	0.125693	0.193146	0.650764	0.515199	0.787392
ENSG00000070761	1369.78	0.605066	0.177787	3.40331	0.000665738	0.0207444
ENSG00000070770	2898.17	-0.138266	0.188705	-0.732707	0.463737	0.755547
ENSG00000070778	673.604	-0.229042	0.314411	-0.728479	0.46632	0.757846
ENSG00000070785	1408.06	-0.316827	0.184587	-1.71641	0.0860874	0.35601
ENSG00000070814	2306.49	-0.753661	0.170557	-4.41881	9.92439e-06	0.00128209
ENSG00000070831	16128	0.281561	0.157703	1.78539	0.0741975	0.332915
ENSG00000070882	2124.28	-0.0360125	0.190162	-0.189378	0.849797	0.944484
ENSG00000070950	3641.37	-0.394538	0.143482	-2.74974	0.00596431	0.078812
ENSG00000070961	5935.79	-0.328824	0.169509	-1.93986	0.052397	0.276052
ENSG00000071051	722.597	0.460126	0.290047	1.58638	0.112653	0.408639
ENSG00000071054	13312.9	-0.53446	0.287875	-1.85656	0.0633731	0.305813
ENSG00000071073	6712.45	0.015776	0.168229	0.0937769	0.925286	0.97127
ENSG00000071082	101246	0.657099	0.204153	3.21866	0.00128792	0.0317052
ENSG00000071127	5128.71	-0.5422	0.288677	-1.87823	0.06035	0.297556
ENSG00000071189	3060.07	-0.303262	0.154771	-1.95942	0.0500634	0.270248
ENSG00000071205	86.6819	-0.45333	0.458227	-0.989313	0.32251	0.651186
ENSG00000071243	1301.11	-0.0339142	0.152163	-0.222881	0.823628	0.938064
ENSG00000071282	701.137	-0.211543	0.379375	-0.557609	0.577111	0.824426
ENSG00000071462	3332.74	0.202734	0.153187	1.32344	0.185688	0.514557
ENSG00000071537	2448	-0.609927	0.250478	-2.43506	0.0148895	0.137431
ENSG00000071539	2078.95	0.0806952	0.196152	0.411391	0.680786	0.878296
ENSG00000071553	3585.47	-0.0360906	0.155276	-0.232429	0.816205	0.934939
ENSG00000071564	4212.87	0.17962	0.294358	0.610211	0.541722	0.802347
ENSG00000071626	4130.85	0.308733	0.199443	1.54797	0.121629	0.425795
ENSG00000071655	1674.34	0.742831	0.52777	1.40749	0.159283	0.481467
ENSG00000071794	1412.73	-0.241345	0.196766	-1.22656	0.219989	0.554679
ENSG00000071859	1498.24	0.287035	0.179875	1.59575	0.110544	0.404654
ENSG00000071889	477.211	0.92079	0.303509	3.03382	0.00241482	0.0446701
ENSG00000071894	1250.58	0.21764	0.346716	0.627719	0.530188	0.796036
ENSG00000071991	492.867	-0.193432	0.272705	-0.709307	0.478134	0.763651
ENSG00000071994	4905.1	0.126044	0.203956	0.618	0.536575	0.799372
ENSG00000072042	5428.19	-0.10416	0.147788	-0.704795	0.480938	0.764956
ENSG00000072062	2532.22	0.175582	0.231545	0.758306	0.448268	0.746154
ENSG00000072071	657.263	0.229567	0.279283	0.821987	0.411084	0.721745
ENSG00000072110	2010.31	-0.224418	0.186058	-1.20617	0.227752	0.561866
ENSG00000072121	1026.89	-0.330689	0.20546	-1.6095	0.107506	0.398433
ENSG00000072134	786.268	0.200007	0.290573	0.68832	0.491251	0.772865
ENSG00000072135	1382.51	0.359237	0.174017	2.06438	0.038982	0.237584
ENSG00000072201	240.992	-0.391565	0.260795	-1.50143	0.133244	0.446028
ENSG00000072210	4060.75	-0.105614	0.200598	-0.526496	0.598544	0.836324
ENSG00000072274	11800.7	-0.371819	0.19987	-1.8603	0.0628431	0.304612
ENSG00000072310	2165.07	0.121198	0.30702	0.394758	0.693022	0.883601
ENSG00000072364	2503.96	-0.491824	0.219746	-2.23815	0.0252112	0.184256
ENSG00000072401	1099.79	0.173572	0.303768	0.571398	0.56773	0.819462
ENSG00000072415	1020.06	-0.359461	0.22377	-1.60638	0.108189	0.400214
ENSG00000072422	1575.7	-0.176671	0.207011	-0.853437	0.393417	0.708253
ENSG00000072501	5807.68	-0.6388	0.291381	-2.19232	0.0283563	0.197538
ENSG00000072506	5052.12	0.4254	0.185798	2.28958	0.0220458	0.172124
ENSG00000072518	1577.08	-0.104076	0.166728	-0.624227	0.532479	0.79745
ENSG00000072571	1743.77	-0.860532	0.2775	-3.10102	0.00192856	0.0391673
ENSG00000072609	1786.11	-0.0195409	0.202877	-0.0963191	0.923267	0.970569
ENSG00000072657	367.637	-0.401465	0.231533	-1.73394	0.0829282	0.349746
ENSG00000072682	334.266	-0.357188	0.23991	-1.48884	0.136529	0.451097
ENSG00000072736	3435	-0.0150593	0.165281	-0.0911133	0.927403	0.972126
ENSG00000072756	2133.6	-0.158112	0.170447	-0.927634	0.353597	0.674854
ENSG00000072778	3479.57	-0.098284	0.190796	-0.515127	0.606465	0.839838
ENSG00000072786	233.238	-0.0977658	0.30696	-0.318496	0.750108	0.906101
ENSG00000072803	4272.15	-0.172382	0.170015	-1.01392	0.31062	0.641808
ENSG00000072840	321.108	-0.359652	0.249019	-1.44427	0.148662	0.467731
ENSG00000072849	2656.36	0.115104	0.188377	0.611031	0.541179	0.801887
ENSG00000072864	1389.57	-0.0255913	0.196664	-0.130127	0.896466	0.960818
ENSG00000072954	122.502	-0.00503624	0.288859	-0.0174349	0.98609	0.995689
ENSG00000072958	2683.71	-0.00873078	0.22541	-0.038733	0.969103	0.989026
ENSG00000073008	3636.19	-0.119476	0.19646	-0.608145	0.543092	0.803086
ENSG00000073050	764.873	-0.220538	0.184199	-1.19728	0.231199	0.565529
ENSG00000073060	7245.71	-0.0805275	0.173855	-0.463188	0.64323	0.859234
ENSG00000073111	4821.35	-0.173743	0.180692	-0.961539	0.336281	0.661706
ENSG00000073150	1055.82	0.249974	0.539599	0.463258	0.64318	0.859234
ENSG00000073169	754.433	0.610323	0.359504	1.69768	0.0895678	0.362542
ENSG00000073331	252.304	0.101018	0.215481	0.468804	0.63921	0.857506
ENSG00000073350	1386.07	0.201987	0.338109	0.597403	0.550239	0.807355
ENSG00000073417	5314.1	-0.0818775	0.16188	-0.505793	0.613002	0.842826
ENSG00000073464	529.561	-0.00423341	0.164935	-0.0256671	0.979523	0.992798
ENSG00000073536	5785.77	-0.200807	0.151198	-1.3281	0.184145	0.513017
ENSG00000073578	1521.54	-0.788703	0.201272	-3.91859	8.90691e-05	0.00522149
ENSG00000073584	2287.1	-0.126021	0.189619	-0.664598	0.506308	0.782213
ENSG00000073605	377.533	-0.0263156	0.409001	-0.0643412	0.948699	0.980711
ENSG00000073614	1467.66	-0.296736	0.235261	-1.2613	0.207199	0.540936
ENSG00000073711	152.039	-0.195859	0.269661	-0.726313	0.467647	0.758398
ENSG00000073712	1582.87	-0.373437	0.208637	-1.78988	0.0734727	0.331812
ENSG00000073734	47.8511	-1.02927	0.507129	-2.02959	0.042398	0.247787
ENSG00000073792	3746.46	-0.360117	0.142616	-2.52508	0.0115672	0.120065
ENSG00000073803	3180.42	-0.150771	0.190381	-0.791944	0.428393	0.732973
ENSG00000073849	9961.34	-0.0699349	0.140677	-0.49713	0.619097	0.845195
ENSG00000073910	1517.16	-0.0445882	0.226022	-0.197273	0.843614	0.942349
ENSG00000073921	4199.02	-0.453871	0.226481	-2.00401	0.0450686	0.255911
ENSG00000073969	1399.51	-0.61744	0.20358	-3.03291	0.00242206	0.0446701
ENSG00000074054	1835.9	-0.153815	0.18081	-0.850696	0.394938	0.710068
ENSG00000074071	3894.59	0.414996	0.277395	1.49605	0.134641	0.448665
ENSG00000074181	44.3838	-0.457046	0.586507	-0.779267	0.435823	0.736867
ENSG00000074201	3407.69	0.0219779	0.166739	0.13181	0.895134	0.960014
ENSG00000074211	57.075	-0.0891233	0.444271	-0.200606	0.841007	0.941522
ENSG00000074219	3233.64	0.253378	0.163502	1.5497	0.121215	0.425103
ENSG00000074266	1334.62	-0.188903	0.176863	-1.06807	0.285489	0.61726
ENSG00000074319	2432.94	-0.109738	0.200768	-0.546589	0.584661	0.828515
ENSG00000074356	1976.39	-0.648145	0.182369	-3.55402	0.000379383	0.0139611
ENSG00000074410	967.072	-0.142786	0.240793	-0.592982	0.553193	0.808871
ENSG00000074416	11265.1	0.103026	0.233054	0.442068	0.65844	0.867408
ENSG00000074527	55.3387	-0.425209	0.432619	-0.982872	0.32567	0.652804
ENSG00000074582	1586.04	0.385257	0.164922	2.33599	0.0194917	0.160793
ENSG00000074590	1384.51	-0.0808613	0.212406	-0.380691	0.703432	0.888522
ENSG00000074603	3795.7	-0.2917	0.17723	-1.64588	0.0997875	0.383261
ENSG00000074621	472.575	0.0166931	0.200743	0.0831566	0.933727	0.974956
ENSG00000074657	881.738	-0.0606012	0.182621	-0.331841	0.740009	0.903193
ENSG00000074695	6482.46	-0.651953	0.195811	-3.3295	0.000870034	0.0246658
ENSG00000074696	15636.1	-0.0328597	0.179869	-0.182687	0.855044	0.946135
ENSG00000074755	854.98	-0.249977	0.223158	-1.12018	0.262639	0.594875
ENSG00000074800	37636.1	-0.391857	0.166282	-2.35659	0.0184436	0.155999
ENSG00000074842	6981.94	0.0611393	0.188227	0.324817	0.74532	0.904753
ENSG00000074855	225.436	0.18763	0.369466	0.507841	0.611565	0.842226
ENSG00000074935	891.803	0.0319667	0.209293	0.152737	0.878606	0.954946
ENSG00000074964	2627.13	0.0449029	0.314569	0.142744	0.886492	0.957772
ENSG00000075089	2200.19	-0.560554	0.219906	-2.54906	0.0108014	0.115843
ENSG00000075131	2125.11	-0.155515	0.197057	-0.78919	0.430001	0.733999
ENSG00000075142	7976.97	0.259376	0.207237	1.25159	0.210718	0.546115
ENSG00000075151	3145.99	-0.40463	0.177037	-2.28557	0.0222793	0.17268
ENSG00000075188	2281.94	-0.0935774	0.189566	-0.493641	0.621559	0.846885
ENSG00000075213	1056.03	-0.275364	0.160475	-1.71593	0.0861751	0.35601
ENSG00000075218	2274.53	-0.0952828	0.187837	-0.507264	0.611969	0.842531
ENSG00000075234	3746.16	-0.096939	0.161203	-0.601348	0.547608	0.805546
ENSG00000075239	2176.42	-0.21391	0.166695	-1.28324	0.199407	0.532279
ENSG00000075240	533.848	0.0693869	0.275488	0.251869	0.801143	0.92985
ENSG00000075275	603.846	-0.0120013	0.348167	-0.0344701	0.972502	0.990334
ENSG00000075292	4045.49	-0.273144	0.196068	-1.39311	0.163588	0.486524
ENSG00000075303	1121.46	0.0251023	0.220043	0.114079	0.909175	0.965863
ENSG00000075336	1907.96	0.127471	0.210951	0.604269	0.545665	0.805084
ENSG00000075391	1332.6	-0.286516	0.193416	-1.48134	0.138516	0.453609
ENSG00000075399	422.723	0.820285	0.269731	3.04112	0.002357	0.0441858
ENSG00000075407	2494.82	-0.468085	0.207542	-2.25538	0.0241096	0.179815
ENSG00000075413	3003.55	-0.0721042	0.136731	-0.527346	0.597954	0.836047
ENSG00000075415	34554.7	0.210454	0.192521	1.09315	0.274327	0.605276
ENSG00000075420	2737.92	-0.0461162	0.189576	-0.243259	0.807805	0.931564
ENSG00000075426	301.1	0.2778	0.249352	1.11409	0.265241	0.596782
ENSG00000075461	83.9053	0.859731	1.14399	0.75152	0.452339	0.749027
ENSG00000075539	706.861	-0.463049	0.230971	-2.00479	0.0449851	0.25585
ENSG00000075568	1728.42	-0.440161	0.16342	-2.69343	0.00707209	0.0873592
ENSG00000075618	369.48	0.162733	0.612158	0.265836	0.790366	0.924946
ENSG00000075624	112354	0.0484143	0.245597	0.197129	0.843727	0.942349
ENSG00000075643	672.17	-0.49178	0.215891	-2.27791	0.0227322	0.174142
ENSG00000075651	1458.35	0.137221	0.14444	0.950023	0.342101	0.666145
ENSG00000075702	2067.48	-0.251079	0.22987	-1.09226	0.274718	0.605582
ENSG00000075711	2784.42	-0.38941	0.169674	-2.29505	0.0217302	0.17043
ENSG00000075785	9377.75	0.358606	0.192496	1.86293	0.0624718	0.303582
ENSG00000075790	2082.9	-0.107904	0.210042	-0.513728	0.607442	0.839976
ENSG00000075856	3537.79	-0.73666	0.175858	-4.18896	2.80239e-05	0.00234976
ENSG00000075914	2689.97	0.2157	0.157701	1.36778	0.171381	0.495207
ENSG00000075945	188.916	-0.348551	0.291804	-1.19447	0.232295	0.566607
ENSG00000075975	4225.28	-0.139178	0.185939	-0.748517	0.454148	0.749868
ENSG00000076003	3825.79	-0.71489	0.16919	-4.22537	2.38547e-05	0.00215706
ENSG00000076043	1902.48	0.211593	0.230445	0.918194	0.358517	0.679568
ENSG00000076053	1246.85	-0.0898214	0.154989	-0.579535	0.562228	0.814892
ENSG00000076067	1911.42	0.192978	0.355567	0.542732	0.587314	0.830488
ENSG00000076108	5357.71	-0.436093	0.162272	-2.68743	0.00720052	0.0883149
ENSG00000076201	2853.92	0.257477	0.254885	1.01017	0.312414	0.643001
ENSG00000076242	4239.54	-0.227069	0.161839	-1.40306	0.1606	0.482688
ENSG00000076248	6030.23	-0.0146882	0.165	-0.0890192	0.929067	0.972508
ENSG00000076258	79.8664	-0.53166	0.304039	-1.74866	0.0803504	0.34678
ENSG00000076321	535.709	-0.0578519	0.222211	-0.260346	0.794597	0.927118
ENSG00000076351	3160.79	-0.0958573	0.190328	-0.503642	0.614513	0.843014
ENSG00000076356	479.006	-0.249476	0.224541	-1.11105	0.266547	0.597678
ENSG00000076382	8474.95	-0.677052	0.185539	-3.6491	0.000263158	0.0110266
ENSG00000076513	2538.6	0.0690024	0.164509	0.419445	0.674891	0.87577
ENSG00000076554	2670.09	0.0211095	0.258114	0.0817836	0.934819	0.97515
ENSG00000076555	770.332	-0.242744	0.260865	-0.930536	0.352093	0.67369
ENSG00000076604	9447.75	0.418254	0.181253	2.30757	0.021023	0.167061
ENSG00000076641	981.356	-0.449032	0.158594	-2.83134	0.0046354	0.0666309
ENSG00000076650	1134.26	-0.504042	0.17946	-2.80866	0.00497474	0.069558
ENSG00000076662	1949.93	0.305308	0.162736	1.87609	0.0606427	0.298008
ENSG00000076685	6919.28	-0.183247	0.155745	-1.17659	0.239361	0.574226
ENSG00000076706	254.663	-0.294759	0.333918	-0.882729	0.377383	0.695682
ENSG00000076770	14031.9	-0.195152	0.222439	-0.877326	0.380309	0.698851
ENSG00000076826	1240.42	0.0656244	0.296681	0.221195	0.82494	0.93811
ENSG00000076864	983.998	-0.144291	0.21237	-0.679432	0.496864	0.776171
ENSG00000076924	891.814	-0.0466209	0.335205	-0.139082	0.889385	0.958157
ENSG00000076928	997.871	-0.111185	0.337075	-0.329853	0.741511	0.90337
ENSG00000076944	533.011	0.220183	0.295667	0.7447	0.456453	0.751342
ENSG00000076984	1454.25	0.152617	0.252792	0.603727	0.546025	0.805128
ENSG00000077044	1703.64	-0.325503	0.206251	-1.57818	0.114523	0.412677
ENSG00000077063	273.853	-0.163508	0.276219	-0.59195	0.553884	0.809014
ENSG00000077092	664.355	-0.0943986	0.31275	-0.301834	0.762779	0.911853
ENSG00000077097	4994.24	-0.896313	0.201008	-4.45909	8.23086e-06	0.00115347
ENSG00000077147	10397.6	-0.109943	0.210533	-0.522213	0.601522	0.837879
ENSG00000077150	330.648	-0.0316164	0.335373	-0.0942723	0.924893	0.971002
ENSG00000077152	3777.32	0.405315	0.186599	2.17212	0.0298465	0.203713
ENSG00000077157	1031.38	-0.372774	0.217116	-1.71694	0.085991	0.35601
ENSG00000077232	5121.18	-0.295475	0.233906	-1.26322	0.20651	0.540495
ENSG00000077235	1263.33	-0.624962	0.195195	-3.20172	0.00136608	0.0329264
ENSG00000077238	1210.07	0.0706703	0.1695	0.416934	0.676727	0.876148
ENSG00000077254	1917.5	0.0564111	0.162532	0.347078	0.728533	0.898067
ENSG00000077312	3759.33	0.982356	0.225068	4.36471	1.27293e-05	0.00150202
ENSG00000077348	1526.32	0.613151	0.302397	2.02764	0.0425971	0.248349
ENSG00000077380	1332.71	-0.273104	0.191265	-1.42788	0.153326	0.474025
ENSG00000077454	227.593	0.402885	0.390797	1.03093	0.302573	0.635798
ENSG00000077458	572.935	0.0893507	0.219233	0.407561	0.683596	0.879627
ENSG00000077463	712.171	0.765615	0.383333	1.99726	0.0457974	0.257938
ENSG00000077514	1817.89	-0.415531	0.178636	-2.32614	0.0200112	0.162856
ENSG00000077549	11002	-0.0041908	0.19226	-0.0217976	0.982609	0.994542
ENSG00000077585	134.267	-0.186543	0.334781	-0.55721	0.577384	0.824426
ENSG00000077616	611.32	-0.040181	0.239715	-0.16762	0.866882	0.950304
ENSG00000077684	1005.34	-0.258629	0.184008	-1.40553	0.159863	0.482156
ENSG00000077713	1086.14	-0.0282247	0.167607	-0.168398	0.86627	0.950204
ENSG00000077721	2469.06	0.309179	0.232371	1.33054	0.18334	0.5116
ENSG00000077782	1677	0.30701	0.169354	1.81282	0.0698589	0.322961
ENSG00000077942	6075.79	-0.466738	0.240436	-1.94121	0.0522327	0.275922
ENSG00000078018	58.089	-0.118048	0.60661	-0.194602	0.845704	0.942777
ENSG00000078043	2446.48	-0.187282	0.16861	-1.11074	0.266681	0.597799
ENSG00000078061	2341.59	0.0870107	0.179982	0.483441	0.628783	0.850699
ENSG00000078070	974.926	-0.51185	0.173211	-2.95507	0.00312598	0.0522081
ENSG00000078124	1415.79	-0.157222	0.229463	-0.685171	0.493236	0.774213
ENSG00000078140	7952.95	0.0775851	0.180186	0.430584	0.666771	0.871861
ENSG00000078142	681.464	-0.425999	0.176238	-2.41718	0.0156411	0.140905
ENSG00000078177	1183.93	-0.378958	0.15612	-2.42736	0.0152093	0.138983
ENSG00000078237	958.71	-0.0904978	0.261894	-0.34555	0.729681	0.898445
ENSG00000078246	1613.07	-0.372993	0.174544	-2.13696	0.0326015	0.214068
ENSG00000078269	3745.82	-0.437659	0.166251	-2.63252	0.00847551	0.0986807
ENSG00000078304	4068.83	0.126773	0.156879	0.808095	0.419036	0.726457
ENSG00000078319	599.013	0.256798	0.20603	1.24641	0.212614	0.547377
ENSG00000078369	24399.5	0.195372	0.172541	1.13232	0.2575	0.590504
ENSG00000078399	276.792	-0.214097	0.229685	-0.932131	0.351269	0.672995
ENSG00000078401	283.499	0.590458	0.75667	0.780338	0.435192	0.736589
ENSG00000078403	4426.88	-0.0401425	0.151454	-0.265047	0.790973	0.925161
ENSG00000078487	240.597	-0.293568	0.24002	-1.2231	0.221291	0.555493
ENSG00000078618	7471.49	-0.765018	0.177662	-4.30603	1.66212e-05	0.00171608
ENSG00000078668	9266.65	0.0849078	0.240993	0.352325	0.724594	0.896549
ENSG00000078674	3304.69	-1.00083	0.184657	-5.41996	5.96124e-08	7.1912e-05
ENSG00000078687	466.147	-0.380909	0.242881	-1.56829	0.116813	0.415976
ENSG00000078699	1394.51	-0.113376	0.151833	-0.746717	0.455235	0.750557
ENSG00000078747	6840.15	-0.496948	0.180999	-2.74558	0.00604035	0.0794664
ENSG00000078804	914.17	0.0434306	0.193519	0.224426	0.822426	0.937872
ENSG00000078808	6070.26	0.0853654	0.255028	0.33473	0.737829	0.902153
ENSG00000078902	2335.97	0.322921	0.205635	1.57036	0.116332	0.415343
ENSG00000078967	1634.43	0.261537	0.341026	0.766912	0.443134	0.742222
ENSG00000079112	1660.09	-0.183761	0.23174	-0.792964	0.427799	0.732686
ENSG00000079134	2457.69	-0.634512	0.128178	-4.95023	7.41274e-07	0.000246841
ENSG00000079150	1043.54	0.13455	0.146529	0.918248	0.358489	0.679568
ENSG00000079156	784.165	-0.254536	0.185518	-1.37203	0.170055	0.493585
ENSG00000079215	816.058	0.0107153	0.259028	0.0413675	0.967003	0.988003
ENSG00000079246	8195.27	-0.572001	0.188574	-3.0333	0.00241898	0.0446701
ENSG00000079277	1876.79	0.147172	0.147355	0.99876	0.317911	0.646999
ENSG00000079308	147.71	0.0545971	0.381538	0.143098	0.886213	0.957772
ENSG00000079313	1228.3	0.193181	0.360726	0.535534	0.592281	0.833252
ENSG00000079332	7311.46	0.15992	0.160213	0.998175	0.318194	0.6471
ENSG00000079335	245.688	-0.0916934	0.223991	-0.409363	0.682274	0.87897
ENSG00000079385	2497.79	-0.232557	0.201727	-1.15283	0.248981	0.582942
ENSG00000079387	2193.9	-0.196376	0.198786	-0.987878	0.323213	0.651784
ENSG00000079432	1535.61	0.208226	0.33189	0.627394	0.530401	0.796234
ENSG00000079459	19831.3	-0.34888	0.167892	-2.078	0.0377093	0.233427
ENSG00000079462	2587.28	0.6232	0.267045	2.33369	0.0196122	0.160993
ENSG00000079557	69.6302	-0.116078	0.429888	-0.270019	0.787145	0.924197
ENSG00000079616	2547.88	-0.326098	0.178571	-1.82615	0.0678283	0.317888
ENSG00000079689	6757.78	-0.083903	0.205342	-0.408601	0.682832	0.879064
ENSG00000079691	192.284	-0.0187721	0.250863	-0.07483	0.94035	0.977434
ENSG00000079739	2870.43	-0.281339	0.213143	-1.31995	0.186851	0.515366
ENSG00000079785	3687.76	-0.554245	0.197812	-2.80188	0.00508064	0.0705022
ENSG00000079805	2739.25	-0.494859	0.201801	-2.45221	0.0141982	0.133656
ENSG00000079819	4620.91	-0.494778	0.231482	-2.13743	0.0325629	0.213916
ENSG00000079931	61.0714	-0.00498002	0.413431	-0.0120456	0.990389	0.996298
ENSG00000079950	2452.3	0.0951863	0.182198	0.522432	0.601369	0.83786
ENSG00000079974	758.976	0.448215	0.204088	2.19618	0.0280789	0.196197
ENSG00000079999	3785.17	-0.00929583	0.167583	-0.0554702	0.955764	0.983195
ENSG00000080007	530.594	0.0455715	0.196533	0.231878	0.816633	0.93512
ENSG00000080031	200.922	0.207206	0.263536	0.786254	0.431719	0.734796
ENSG00000080189	4779.84	0.267187	0.172823	1.54602	0.122099	0.426404
ENSG00000080200	1397.71	-0.297026	0.176267	-1.68509	0.0919718	0.366814
ENSG00000080224	117.431	0.0540163	0.300097	0.179996	0.857155	0.946814
ENSG00000080298	409.687	-0.251289	0.209597	-1.19891	0.230561	0.564669
ENSG00000080345	3114.01	-0.48808	0.237441	-2.05559	0.0398224	0.239311
ENSG00000080371	2930.35	-0.185666	0.248612	-0.74681	0.455178	0.750557
ENSG00000080493	428.29	-0.17271	0.327764	-0.526933	0.59824	0.836324
ENSG00000080503	52.4036	-1.38199	0.511065	-2.70414	0.00684819	0.0856784
ENSG00000080546	707.343	-0.150697	0.1875	-0.803718	0.42156	0.728671
ENSG00000080561	179.233	-0.0875376	0.251134	-0.348569	0.727413	0.897428
ENSG00000080603	103.336	-0.0940649	0.384932	-0.244367	0.806946	0.93121
ENSG00000080608	1396.07	-0.594706	0.199427	-2.98208	0.002863	0.0496345
ENSG00000080618	6058.82	0.0147046	0.209621	0.0701487	0.944075	0.97873
ENSG00000080802	1288.35	-0.173029	0.181194	-0.954937	0.339609	0.663958
ENSG00000080815	1975.93	-0.137048	0.182791	-0.749754	0.453403	0.749691
ENSG00000080819	1712.84	-0.404661	0.177347	-2.28175	0.0225039	0.17345
ENSG00000080822	3750.12	0.0948809	0.160047	0.59283	0.553295	0.808871
ENSG00000080823	79.5905	0.314024	0.344728	0.910932	0.362331	0.682338
ENSG00000080824	36379.1	-1.2637	0.300599	-4.20393	2.6232e-05	0.00224024
ENSG00000080839	1126.39	-0.650799	0.219667	-2.96266	0.00304996	0.0513962
ENSG00000080845	2010.61	0.0528984	0.192951	0.274155	0.783966	0.922951
ENSG00000080986	2115.32	-0.589938	0.19202	-3.07227	0.00212438	0.0415125
ENSG00000081014	990.391	-0.40617	0.197403	-2.05757	0.0396316	0.239036
ENSG00000081019	1510.24	-0.262946	0.202398	-1.29915	0.193891	0.525247
ENSG00000081026	846.902	-0.360674	0.190276	-1.89553	0.0580223	0.29129
ENSG00000081041	153.136	0.245078	0.316314	0.774794	0.438462	0.73833
ENSG00000081051	362733	-0.1599	0.214152	-0.746664	0.455266	0.750557
ENSG00000081059	697.439	0.262607	0.22549	1.16461	0.244178	0.578454
ENSG00000081087	1289.13	0.197847	0.206489	0.958145	0.33799	0.662627
ENSG00000081148	56.3665	-0.0462414	0.394816	-0.117122	0.906764	0.965229
ENSG00000081154	12660	-0.179451	0.152119	-1.17967	0.238132	0.572758
ENSG00000081177	386.768	-0.212455	0.194387	-1.09295	0.274417	0.605276
ENSG00000081181	942.573	-0.0326542	0.210571	-0.155075	0.876762	0.954072
ENSG00000081189	318.007	-0.258857	0.228372	-1.13349	0.257009	0.589964
ENSG00000081237	564.23	-0.307573	0.217295	-1.41546	0.156933	0.478457
ENSG00000081307	3651.64	-0.257363	0.16288	-1.58008	0.114087	0.4119
ENSG00000081320	709.093	0.0340076	0.210439	0.161603	0.871618	0.952504
ENSG00000081377	1950.56	-0.117689	0.224921	-0.523248	0.600802	0.837439
ENSG00000081386	845.251	-0.155718	0.198084	-0.786123	0.431796	0.734796
ENSG00000081479	326.5	-0.148914	0.26016	-0.572394	0.567055	0.818975
ENSG00000081665	1352.45	-0.122643	0.149058	-0.82279	0.410627	0.721515
ENSG00000081692	1617.98	0.723478	0.207189	3.49188	0.000479639	0.0163153
ENSG00000081721	2981.82	0.219675	0.165117	1.33043	0.183378	0.511603
ENSG00000081760	534.571	-0.237208	0.19026	-1.24676	0.212487	0.547377
ENSG00000081791	1156.57	0.432417	0.219605	1.96907	0.0489452	0.268797
ENSG00000081803	2266.44	-0.541952	0.18499	-2.92962	0.00339374	0.0549794
ENSG00000081818	105.814	-0.195243	0.386616	-0.505004	0.613556	0.842826
ENSG00000081853	128.432	0.148536	0.284529	0.522039	0.601643	0.837879
ENSG00000081870	2004.83	0.141149	0.262691	0.53732	0.591047	0.832698
ENSG00000081913	717.119	-0.164677	0.18084	-0.910622	0.362495	0.682338
ENSG00000081923	581.338	-0.510758	0.17283	-2.95527	0.00312399	0.0522081
ENSG00000082014	584.759	0.304859	0.205286	1.48504	0.137532	0.452233
ENSG00000082068	1715.27	-0.848443	0.173799	-4.88174	1.05153e-06	0.000296896
ENSG00000082146	4149.94	0.220435	0.1667	1.32235	0.186052	0.514924
ENSG00000082153	8805.55	-0.0694804	0.243179	-0.285717	0.775095	0.917945
ENSG00000082196	294.693	0.003475	0.251553	0.0138142	0.988978	0.995992
ENSG00000082212	1741.87	-0.435159	0.286873	-1.5169	0.129292	0.438973
ENSG00000082213	2951.14	-0.16415	0.136101	-1.20608	0.227785	0.561866
ENSG00000082258	3604.62	-0.0883913	0.177982	-0.496629	0.61945	0.845427
ENSG00000082269	1834.11	-0.341957	0.230645	-1.48261	0.138178	0.453329
ENSG00000082438	3579.54	-0.0972799	0.113553	-0.856689	0.391617	0.707379
ENSG00000082512	236.118	-0.26308	0.352174	-0.747016	0.455054	0.750557
ENSG00000082515	4559.5	-0.10359	0.203699	-0.508546	0.611071	0.841797
ENSG00000082516	1282.05	-0.370595	0.202642	-1.82882	0.0674271	0.316862
ENSG00000082641	3200.5	-0.125412	0.17045	-0.735769	0.461871	0.754694
ENSG00000082701	4005.12	-0.0732393	0.137607	-0.532235	0.594563	0.834284
ENSG00000082781	4029.1	-0.0466498	0.188386	-0.247628	0.804422	0.930789
ENSG00000082805	873.58	-0.422224	0.265289	-1.59156	0.111483	0.406422
ENSG00000082898	11330.1	-0.393256	0.200583	-1.96057	0.0499293	0.269813
ENSG00000082996	1516.25	-0.257851	0.1535	-1.67981	0.0929943	0.368752
ENSG00000083093	1405.37	-0.0706601	0.164744	-0.428909	0.667989	0.872757
ENSG00000083097	360.879	-0.194352	0.275165	-0.706311	0.479995	0.764454
ENSG00000083099	4424.27	-0.335909	0.213902	-1.57039	0.116325	0.415343
ENSG00000083123	1496.25	-0.104527	0.173739	-0.601634	0.547418	0.805546
ENSG00000083168	1824.75	-0.60665	0.25063	-2.4205	0.0154993	0.140336
ENSG00000083223	1020.98	-0.420578	0.189023	-2.22501	0.0260808	0.188001
ENSG00000083312	4625.01	-0.427748	0.235397	-1.81713	0.0691965	0.321253
ENSG00000083444	2389.93	-0.461448	0.173487	-2.65985	0.00781764	0.0929016
ENSG00000083457	4462.87	-0.054614	0.222691	-0.245245	0.806266	0.93121
ENSG00000083520	2889.88	-0.385927	0.15544	-2.48281	0.0130351	0.127729
ENSG00000083535	1073.9	-0.416737	0.196019	-2.126	0.0335032	0.21741
ENSG00000083544	451.61	-0.47813	0.203673	-2.34754	0.0188981	0.1584
ENSG00000083635	869.805	-0.624031	0.176997	-3.52566	0.000422435	0.0150629
ENSG00000083642	1717.33	-0.608433	0.186041	-3.27043	0.00107385	0.0282812
ENSG00000083720	556.458	-0.698989	0.208443	-3.35338	0.000798298	0.0232515
ENSG00000083750	197.543	0.706805	0.309641	2.28266	0.0224504	0.173134
ENSG00000083799	364.836	-0.281947	0.229423	-1.22894	0.219095	0.553992
ENSG00000083807	162.544	0.502608	0.330291	1.52171	0.128081	0.43656
ENSG00000083812	446.021	-0.227209	0.226947	-1.00115	0.316753	0.646423
ENSG00000083814	360.119	0.346638	0.338054	1.02539	0.305179	0.637699
ENSG00000083817	535.17	0.091906	0.227277	0.404379	0.685934	0.88041
ENSG00000083828	884.956	0.189842	0.20127	0.943221	0.345568	0.668993
ENSG00000083838	263.726	0.699679	0.352979	1.98221	0.0474553	0.263672
ENSG00000083844	611.706	0.0687979	0.195595	0.351737	0.725036	0.896549
ENSG00000083845	80795.8	0.986855	0.211516	4.66564	3.07661e-06	0.000644923
ENSG00000083857	970.497	-0.297023	0.201998	-1.47043	0.141446	0.457973
ENSG00000083896	3624.23	-0.170899	0.157336	-1.0862	0.27739	0.609834
ENSG00000083937	1903.5	-0.056298	0.229888	-0.244893	0.806539	0.93121
ENSG00000084070	2688.38	0.0235855	0.184728	0.127677	0.898405	0.961634
ENSG00000084072	1532.16	0.272532	0.174998	1.55734	0.119389	0.42201
ENSG00000084073	3763.45	-0.551394	0.183376	-3.0069	0.00263923	0.0471755
ENSG00000084090	17140.3	0.285059	0.167591	1.70092	0.0889578	0.361325
ENSG00000084092	1250.87	0.0152533	0.151617	0.100604	0.919865	0.96911
ENSG00000084093	1391.33	-0.435419	0.197697	-2.20246	0.0276329	0.194853
ENSG00000084110	705.955	-0.0674501	0.661747	-0.101927	0.918814	0.968665
ENSG00000084112	2739.8	-0.103603	0.206726	-0.501161	0.616258	0.843896
ENSG00000084207	58544.1	0.707325	0.242825	2.9129	0.00358094	0.0566198
ENSG00000084234	8962.76	-0.634698	0.21923	-2.89512	0.00379011	0.0585879
ENSG00000084444	133.545	-0.57922	0.271138	-2.13625	0.0326588	0.214241
ENSG00000084453	1004.56	-0.290345	0.194647	-1.49165	0.135791	0.45013
ENSG00000084463	6625.38	-0.656859	0.151512	-4.33536	1.45519e-05	0.0016152
ENSG00000084623	13322.9	0.118127	0.225843	0.523048	0.600941	0.837516
ENSG00000084628	74.7865	0.0435841	0.332069	0.13125	0.895577	0.960266
ENSG00000084652	5813	-0.136377	0.201759	-0.675943	0.499077	0.777444
ENSG00000084674	55863.5	-0.46552	0.194629	-2.39183	0.0167647	0.146612
ENSG00000084676	661.06	-0.504681	0.158124	-3.19168	0.0014145	0.0335051
ENSG00000084693	1987.4	0.318207	0.167999	1.8941	0.0582121	0.291691
ENSG00000084710	80.0829	-0.0282394	0.321578	-0.0878152	0.930024	0.973215
ENSG00000084731	195.895	-0.149661	0.276664	-0.540948	0.588544	0.831292
ENSG00000084733	3590.11	0.128136	0.229431	0.558492	0.576508	0.824426
ENSG00000084734	119.779	0.406824	0.343151	1.18555	0.235798	0.570441
ENSG00000084754	3259.13	-0.419084	0.209434	-2.00103	0.0453891	0.257044
ENSG00000084764	141.598	0.772572	0.278215	2.77689	0.00548815	0.0743668
ENSG00000084774	2379.3	0.0908257	0.241996	0.375318	0.707424	0.889818
ENSG00000085063	4201.97	-0.0247568	0.225799	-0.109641	0.912694	0.967051
ENSG00000085185	943.087	-0.260453	0.231839	-1.12342	0.261259	0.593431
ENSG00000085224	2256.65	-0.881815	0.248816	-3.54405	0.000394031	0.0143082
ENSG00000085231	2264.16	0.0457185	0.2263	0.202026	0.839896	0.941091
ENSG00000085274	1596.77	-0.235957	0.170277	-1.38572	0.165831	0.489081
ENSG00000085276	1236.62	-0.0150778	0.172672	-0.0873204	0.930417	0.973382
ENSG00000085365	1240.75	-0.279441	0.193719	-1.44251	0.14916	0.468379
ENSG00000085377	1072.19	-0.364928	0.220276	-1.65669	0.0975828	0.37785
ENSG00000085382	841.287	-0.0569418	0.17839	-0.319199	0.749576	0.905992
ENSG00000085415	6312.51	-0.0323632	0.151317	-0.213877	0.830643	0.939905
ENSG00000085433	383.324	0.0570299	0.231234	0.246633	0.805192	0.930891
ENSG00000085449	2468.75	0.201323	0.169343	1.18885	0.234499	0.569574
ENSG00000085465	603.751	-0.414923	0.239265	-1.73416	0.0828898	0.349746
ENSG00000085491	1436.63	-0.565786	0.259916	-2.17681	0.0294951	0.202413
ENSG00000085511	1396.22	-0.551128	0.194473	-2.83396	0.0045975	0.0663257
ENSG00000085563	843.12	0.038145	0.256253	0.148857	0.881667	0.95617
ENSG00000085644	189.624	0.287508	0.41586	0.691357	0.489341	0.771514
ENSG00000085662	443.389	0.100824	0.260936	0.386395	0.699204	0.886099
ENSG00000085719	984.962	-0.269685	0.219089	-1.23094	0.218344	0.553158
ENSG00000085721	1659.74	-0.711626	0.164301	-4.33124	1.48269e-05	0.0016152
ENSG00000085733	6499.43	0.210577	0.166306	1.2662	0.20544	0.539637
ENSG00000085760	3621.05	0.0784417	0.183778	0.426828	0.669505	0.873599
ENSG00000085788	3572.52	0.0283817	0.178601	0.158911	0.873739	0.953019
ENSG00000085831	236.693	0.11794	0.273829	0.430708	0.666681	0.871861
ENSG00000085832	3642.89	-0.412075	0.141604	-2.91006	0.00361365	0.05694
ENSG00000085840	1951.27	-0.0171139	0.166721	-0.10265	0.918241	0.968665
ENSG00000085871	6678.96	0.202395	0.206523	0.980007	0.327083	0.654394
ENSG00000085872	1764.3	-0.159984	0.280061	-0.571246	0.567833	0.819468
ENSG00000085978	1604.25	-0.0815404	0.185265	-0.440128	0.659845	0.868633
ENSG00000085982	3309.88	-0.382518	0.138265	-2.76656	0.00566509	0.0760937
ENSG00000085998	3793.4	0.0960006	0.171951	0.558301	0.576639	0.824426
ENSG00000085999	1900.08	0.10471	0.177535	0.589798	0.555326	0.809965
ENSG00000086015	4678.68	-0.0804239	0.166015	-0.484438	0.628075	0.850557
ENSG00000086061	10808.8	-0.456852	0.271371	-1.68349	0.0922793	0.367407
ENSG00000086062	4482.8	0.144319	0.180757	0.798414	0.42463	0.731304
ENSG00000086065	2223.81	0.126194	0.16233	0.777387	0.43693	0.736981
ENSG00000086102	3128.87	-0.203109	0.224388	-0.905169	0.365376	0.684445
ENSG00000086189	2240.42	0.152458	0.186579	0.817126	0.413857	0.722963
ENSG00000086200	1253.32	-0.606378	0.179616	-3.37597	0.000735569	0.0219764
ENSG00000086205	142.761	-0.327188	0.267782	-1.22185	0.221765	0.556121
ENSG00000086232	16800	0.0934478	0.186847	0.50013	0.616983	0.844226
ENSG00000086289	55.4209	0.30319	0.459222	0.660224	0.50911	0.783357
ENSG00000086300	1229.93	0.0265724	0.167993	0.158176	0.874318	0.953132
ENSG00000086475	9475.47	0.452702	0.241343	1.87576	0.0606876	0.298052
ENSG00000086504	1861.72	0.594409	0.260245	2.28403	0.0223696	0.172992
ENSG00000086506	57.0452	0.370382	0.603881	0.613336	0.539654	0.80057
ENSG00000086544	934.997	0.00156698	0.158542	0.00988364	0.992114	0.997076
ENSG00000086589	1860.22	-0.299607	0.193141	-1.55124	0.120845	0.424539
ENSG00000086598	11376.8	0.104554	0.21089	0.495776	0.620052	0.84595
ENSG00000086619	218.015	0.209045	0.233037	0.897046	0.369694	0.688286
ENSG00000086666	4022.59	-0.117529	0.128797	-0.912509	0.361501	0.682129
ENSG00000086696	2420.23	-0.0311769	0.189426	-0.164586	0.86927	0.951376
ENSG00000086712	1297.96	-0.807303	0.219508	-3.67779	0.000235261	0.0100149
ENSG00000086730	75.1861	0.604333	0.361782	1.67043	0.0948334	0.372274
ENSG00000086758	8509.55	-0.322902	0.189728	-1.70192	0.0887707	0.361006
ENSG00000086827	1050	-0.490559	0.17755	-2.76294	0.00572827	0.0763494
ENSG00000086848	540.496	-0.15854	0.183286	-0.864983	0.387048	0.704393
ENSG00000086991	68.8298	0.0750452	0.43942	0.170782	0.864395	0.950204
ENSG00000087008	354.067	-0.605444	0.220748	-2.7427	0.00609367	0.0799108
ENSG00000087053	2210.33	-0.53718	0.187156	-2.87022	0.00410186	0.0612843
ENSG00000087074	4383.58	-0.122801	0.233671	-0.525532	0.599213	0.836709
ENSG00000087076	202.51	0.195701	0.329834	0.593332	0.552959	0.808688
ENSG00000087077	2524.9	0.712449	0.244852	2.90971	0.00361766	0.05694
ENSG00000087085	59.2586	1.03809	0.50105	2.07183	0.038281	0.235072
ENSG00000087086	574806	1.29248	0.277784	4.65281	3.27439e-06	0.000651007
ENSG00000087087	3258.68	0.171844	0.212741	0.80776	0.419229	0.726457
ENSG00000087088	7229.11	0.535342	0.187095	2.86135	0.00421844	0.0624194
ENSG00000087095	1380.81	0.22692	0.181307	1.25158	0.210724	0.546115
ENSG00000087111	3482.89	-0.0651344	0.175222	-0.371724	0.710098	0.890806
ENSG00000087152	4941.94	0.268396	0.141597	1.8955	0.0580264	0.29129
ENSG00000087157	849.865	0.0505664	0.229384	0.220444	0.825526	0.93817
ENSG00000087191	13891.8	0.0808375	0.194256	0.41614	0.677307	0.876408
ENSG00000087206	2691.24	-0.186897	0.174078	-1.07364	0.282984	0.615386
ENSG00000087263	2175.51	-0.685704	0.201995	-3.39465	0.000687164	0.0210796
ENSG00000087266	290.25	0.13258	0.307027	0.431818	0.665873	0.871722
ENSG00000087269	3684.54	-0.901152	0.171436	-5.25648	1.46838e-07	0.000106498
ENSG00000087274	5136.89	-0.597304	0.146557	-4.07557	4.59025e-05	0.00330761
ENSG00000087299	1037.65	-0.369959	0.197207	-1.87599	0.060657	0.298008
ENSG00000087301	391.511	-0.261028	0.192749	-1.35424	0.175661	0.502227
ENSG00000087302	5190.96	-0.069458	0.201984	-0.343879	0.730937	0.89905
ENSG00000087338	3086.12	-0.346733	0.21349	-1.62412	0.10435	0.39188
ENSG00000087365	5200.53	-1.07017	0.15351	-6.97133	3.13958e-12	2.17181e-08
ENSG00000087448	916.466	-0.170809	0.167982	-1.01683	0.309233	0.641089
ENSG00000087460	71217.9	0.338178	0.198603	1.70278	0.0886088	0.360453
ENSG00000087470	4814.31	-0.374985	0.191499	-1.95815	0.050212	0.270515
ENSG00000087502	3737.13	-0.302125	0.195394	-1.54624	0.122048	0.426404
ENSG00000087586	7019.87	-0.187108	0.194343	-0.962773	0.335662	0.661178
ENSG00000087842	2215.16	0.196335	0.175987	1.11562	0.264584	0.596175
ENSG00000087884	1050.16	0.303111	0.24509	1.23673	0.216186	0.55041
ENSG00000087903	580.525	0.269264	0.188629	1.42748	0.153442	0.474149
ENSG00000087995	1022.72	-0.242823	0.179743	-1.35094	0.176714	0.50363
ENSG00000088035	600.341	-0.19758	0.262381	-0.753027	0.451434	0.748343
ENSG00000088038	1832.86	-0.0694196	0.210706	-0.329462	0.741807	0.90337
ENSG00000088179	1087.21	-0.146578	0.170333	-0.86054	0.389492	0.705501
ENSG00000088205	3067.29	-0.421789	0.174955	-2.41085	0.0159154	0.142782
ENSG00000088247	10776.6	-0.139687	0.326918	-0.427284	0.669172	0.873488
ENSG00000088256	1921.8	0.396444	0.310015	1.27879	0.200972	0.534289
ENSG00000088280	1177.22	-0.00215242	0.20654	-0.0104213	0.991685	0.997021
ENSG00000088298	2771.81	0.113178	0.204195	0.554266	0.579397	0.825113
ENSG00000088305	899.4	-0.12863	0.192466	-0.668323	0.503928	0.781203
ENSG00000088325	6908.16	-0.221754	0.23656	-0.937411	0.348547	0.670209
ENSG00000088356	3898.97	0.126825	0.17806	0.712264	0.476302	0.76266
ENSG00000088367	208.872	0.0989091	0.400309	0.247082	0.804845	0.930789
ENSG00000088387	409.109	-0.577998	0.193843	-2.98179	0.00286572	0.0496345
ENSG00000088448	1901.83	0.116497	0.209613	0.555775	0.578365	0.824426
ENSG00000088451	946.265	-0.210622	0.148842	-1.41507	0.157048	0.478457
ENSG00000088543	74.3987	0.366779	0.434426	0.844284	0.398511	0.712595
ENSG00000088682	1182.01	0.397668	0.186314	2.13439	0.0328106	0.214525
ENSG00000088727	649.966	0.151302	0.26579	0.569253	0.569184	0.820192
ENSG00000088766	5746.44	-0.32959	0.210718	-1.56413	0.117786	0.418312
ENSG00000088808	473.636	-0.0247976	0.233043	-0.106408	0.915259	0.96759
ENSG00000088812	2868.07	-0.394565	0.173872	-2.26928	0.0232514	0.176269
ENSG00000088826	1307.3	0.538614	0.236307	2.2793	0.0226491	0.173921
ENSG00000088832	13847	0.150149	0.17965	0.835784	0.403276	0.716608
ENSG00000088833	5774.41	-0.05277	0.190648	-0.276792	0.78194	0.921932
ENSG00000088836	627.142	-0.134997	0.242848	-0.55589	0.578286	0.824426
ENSG00000088854	595.497	-0.220866	0.246969	-0.894304	0.371159	0.689352
ENSG00000088876	786.008	-0.246648	0.318161	-0.775231	0.438203	0.738087
ENSG00000088881	258.938	0.430804	0.367881	1.17104	0.241582	0.576181
ENSG00000088888	7104.29	-0.427191	0.242786	-1.75953	0.0784869	0.342761
ENSG00000088899	1584.64	0.559679	0.223388	2.50541	0.0122308	0.123514
ENSG00000088926	173.065	0.832434	0.243465	3.41911	0.000628265	0.019816
ENSG00000088930	6148.62	-0.39187	0.170937	-2.29248	0.0218782	0.171299
ENSG00000088970	736.714	-0.220216	0.217653	-1.01178	0.311645	0.642278
ENSG00000088986	20004.7	0.174782	0.240025	0.728181	0.466503	0.757938
ENSG00000088992	1137.4	0.328706	0.203541	1.61494	0.106325	0.396583
ENSG00000089006	25896.7	-0.106773	0.154603	-0.690628	0.489799	0.771885
ENSG00000089009	80077.2	0.441453	0.203729	2.16687	0.0302451	0.204917
ENSG00000089022	4079.61	0.0475644	0.157826	0.301373	0.76313	0.911899
ENSG00000089048	3334.72	-0.774054	0.228779	-3.38341	0.000715924	0.0216736
ENSG00000089050	2844.78	0.00842554	0.206728	0.0407567	0.96749	0.98835
ENSG00000089053	8017.24	0.311201	0.195043	1.59555	0.110589	0.404654
ENSG00000089057	3791.34	-0.167203	0.191781	-0.871845	0.383293	0.700695
ENSG00000089060	256.421	0.589106	0.23958	2.45891	0.0139359	0.132602
ENSG00000089063	25814.2	-0.0758519	0.20146	-0.376512	0.706537	0.889551
ENSG00000089091	91.2026	-0.400981	0.285408	-1.40494	0.160038	0.482156
ENSG00000089094	955.755	-0.114804	0.206003	-0.557296	0.577325	0.824426
ENSG00000089123	890.873	-0.0379582	0.188363	-0.201516	0.840295	0.941091
ENSG00000089154	3206.19	-0.268002	0.193068	-1.38813	0.165098	0.488272
ENSG00000089157	231594	0.704404	0.163672	4.30374	1.67936e-05	0.00172103
ENSG00000089159	2422.24	0.0283165	0.152745	0.185384	0.852928	0.945534
ENSG00000089163	47.9219	0.068822	0.430684	0.159797	0.873041	0.952909
ENSG00000089177	722.222	-0.873215	0.216868	-4.02648	5.66174e-05	0.00380244
ENSG00000089195	3026.19	-0.349255	0.172934	-2.01958	0.0434271	0.250862
ENSG00000089199	45.2086	-0.481874	0.605227	-0.796187	0.425923	0.732059
ENSG00000089220	26128.7	0.308533	0.157502	1.95891	0.0501238	0.27025
ENSG00000089234	1518.75	-0.22292	0.146969	-1.51679	0.129321	0.438973
ENSG00000089248	15958.9	0.0204124	0.170874	0.119458	0.904912	0.964445
ENSG00000089280	9258.94	-0.016861	0.238958	-0.0705606	0.943747	0.97873
ENSG00000089289	2394.92	0.0639951	0.166417	0.384546	0.700574	0.886855
ENSG00000089335	1416.43	0.417873	0.274832	1.52047	0.128393	0.43709
ENSG00000089351	1829.72	0.416584	0.292873	1.42241	0.154908	0.4762
ENSG00000089472	72.2519	-0.0288918	0.492029	-0.0587197	0.953175	0.982651
ENSG00000089486	2105.35	0.395196	0.1546	2.55625	0.0105808	0.114008
ENSG00000089597	18492.5	-0.152742	0.143242	-1.06632	0.286281	0.61808
ENSG00000089639	286.705	0.057235	0.275574	0.207693	0.835468	0.940786
ENSG00000089682	651.056	-0.399635	0.210167	-1.90151	0.0572346	0.289748
ENSG00000089685	13129.8	-0.0908865	0.197719	-0.459676	0.645749	0.859906
ENSG00000089693	13017.8	0.470675	0.142022	3.31411	0.000919355	0.0256437
ENSG00000089723	50.5745	0.515715	0.374199	1.37818	0.168146	0.491775
ENSG00000089737	2186.1	-0.248298	0.189503	-1.31026	0.190109	0.519729
ENSG00000089775	539.281	-0.19504	0.195615	-0.997061	0.318735	0.647533
ENSG00000089818	2253.79	0.0349843	0.200706	0.174306	0.861625	0.949545
ENSG00000089876	811.055	-0.22108	0.192242	-1.15001	0.25014	0.583717
ENSG00000089902	1483.85	-0.352123	0.184192	-1.91172	0.0559127	0.286125
ENSG00000089916	1208.13	-0.116952	0.222755	-0.525027	0.599565	0.836809
ENSG00000090013	2473.25	0.569043	0.333979	1.70383	0.0884125	0.360272
ENSG00000090020	438.025	0.0989865	0.196453	0.50387	0.614353	0.843014
ENSG00000090054	1975.19	-0.547527	0.17451	-3.13751	0.00170387	0.0370064
ENSG00000090060	23232.2	-0.174187	0.206262	-0.844494	0.398393	0.712575
ENSG00000090061	3042.98	-0.368747	0.184327	-2.00051	0.0454457	0.257149
ENSG00000090097	2304.14	0.358484	0.245442	1.46056	0.144135	0.461707
ENSG00000090238	155.484	0.552668	0.433348	1.27534	0.202188	0.535054
ENSG00000090263	6819.28	0.0371246	0.21464	0.172962	0.862682	0.949901
ENSG00000090266	5564.37	0.331905	0.215268	1.54182	0.123117	0.428206
ENSG00000090273	7761.52	-0.011526	0.164787	-0.0699451	0.944237	0.978747
ENSG00000090316	3457.49	0.0781755	0.225572	0.346566	0.728917	0.898177
ENSG00000090339	2995.59	-0.597585	0.182991	-3.26566	0.0010921	0.0285582
ENSG00000090372	4740.18	0.23921	0.260711	0.917526	0.358867	0.679568
ENSG00000090376	52.8845	-0.393268	0.424124	-0.927248	0.353798	0.674865
ENSG00000090382	20256.8	0.143077	0.202334	0.707134	0.479483	0.76407
ENSG00000090402	94.2127	-0.32706	0.35186	-0.929518	0.352621	0.674013
ENSG00000090432	1404.34	0.0376193	0.150342	0.250225	0.802413	0.93031
ENSG00000090447	624.533	0.194102	0.281411	0.689745	0.490354	0.772231
ENSG00000090470	1425.49	-0.219873	0.209706	-1.04848	0.294416	0.627269
ENSG00000090487	3272.11	0.235451	0.155502	1.51414	0.129992	0.440182
ENSG00000090512	49.385	0.0983175	0.467131	0.210471	0.8333	0.940505
ENSG00000090520	4117.05	0.0782022	0.188224	0.415474	0.677795	0.876514
ENSG00000090530	142.339	-0.117768	0.440257	-0.267498	0.789086	0.924572
ENSG00000090534	619.502	-0.0221995	0.239448	-0.0927112	0.926133	0.971398
ENSG00000090539	61.0166	0.393609	0.459221	0.857125	0.391376	0.707247
ENSG00000090565	1035.73	0.137597	0.306189	0.449385	0.653154	0.863987
ENSG00000090581	905.915	0.345866	0.305694	1.13141	0.257882	0.59089
ENSG00000090612	725.301	-0.128168	0.200184	-0.640254	0.522007	0.790669
ENSG00000090615	2746.15	-0.268357	0.273017	-0.982935	0.32564	0.652804
ENSG00000090621	13375.3	-0.0775114	0.246066	-0.315003	0.75276	0.90767
ENSG00000090661	987.091	0.557924	0.209743	2.66004	0.00781321	0.0929016
ENSG00000090674	505.273	0.542939	0.204023	2.66117	0.00778701	0.0928246
ENSG00000090686	2839.22	-0.305058	0.134782	-2.26334	0.0236146	0.177655
ENSG00000090857	3648.44	-0.135603	0.157804	-0.859311	0.390169	0.706033
ENSG00000090861	6782.83	-0.168593	0.160009	-1.05365	0.292043	0.624591
ENSG00000090863	2903.78	-0.366708	0.183772	-1.99546	0.0459932	0.258245
ENSG00000090889	2870.09	-0.595858	0.235434	-2.53089	0.0113775	0.119205
ENSG00000090905	2716.8	-0.429083	0.250251	-1.71461	0.0864167	0.35655
ENSG00000090924	957.32	0.189124	0.223095	0.847731	0.396588	0.711228
ENSG00000090971	1005.45	0.339803	0.269159	1.26246	0.206783	0.540495
ENSG00000090975	246.535	0.224365	0.284779	0.787859	0.430779	0.734378
ENSG00000090989	437.703	-0.311054	0.193123	-1.61065	0.107256	0.398037
ENSG00000091009	907.736	-0.678383	0.298341	-2.27385	0.0229751	0.175079
ENSG00000091039	2374.56	-0.38462	0.212718	-1.80812	0.0705878	0.324346
ENSG00000091073	155.753	0.438041	0.374342	1.17016	0.241935	0.576181
ENSG00000091127	2880.61	-0.412028	0.199695	-2.06329	0.0390851	0.237762
ENSG00000091129	1563.8	-0.344208	0.317699	-1.08344	0.278612	0.610989
ENSG00000091136	6913.24	-0.340142	0.157637	-2.15776	0.0309465	0.207978
ENSG00000091138	114.745	-0.307333	0.365382	-0.841128	0.400276	0.714742
ENSG00000091140	2930.14	-1.0394	0.214038	-4.85614	1.19698e-06	0.000324709
ENSG00000091157	210.319	0.189546	0.306845	0.617725	0.536757	0.799372
ENSG00000091164	4306.05	-0.0745954	0.223051	-0.334433	0.738053	0.902188
ENSG00000091262	2654.11	-0.0846951	0.202657	-0.417924	0.676003	0.876063
ENSG00000091317	24886.7	-0.0391738	0.157968	-0.247986	0.804145	0.930789
ENSG00000091409	4127.54	-0.423871	0.189726	-2.23413	0.0254747	0.185594
ENSG00000091428	53.4557	-0.351052	0.400967	-0.875515	0.381294	0.699357
ENSG00000091436	2771.72	-0.47144	0.211761	-2.22629	0.0259949	0.187703
ENSG00000091483	3888.38	-0.461673	0.181487	-2.54383	0.0109643	0.116361
ENSG00000091490	6493.01	-0.0937848	0.507009	-0.184977	0.853247	0.945585
ENSG00000091513	40456.1	-0.549196	0.215902	-2.54373	0.0109675	0.116361
ENSG00000091527	13666.8	-0.0412062	0.227911	-0.1808	0.856525	0.946487
ENSG00000091542	4946.03	0.0914047	0.135183	0.676158	0.498941	0.777414
ENSG00000091583	7582.17	-0.417596	0.22358	-1.86777	0.0617937	0.30166
ENSG00000091592	6542.23	0.284709	0.2426	1.17357	0.240567	0.57502
ENSG00000091640	1850.51	0.500761	0.173459	2.88691	0.0038904	0.0594737
ENSG00000091651	3512.69	0.313397	0.184809	1.69579	0.0899256	0.363141
ENSG00000091656	462.724	-0.392759	0.224639	-1.7484	0.080394	0.34678
ENSG00000091732	2238.83	-0.240256	0.180445	-1.33147	0.183036	0.511368
ENSG00000091947	1436.64	0.51383	0.18295	2.80858	0.00497605	0.069558
ENSG00000091986	62.0333	-0.81977	1.05861	-0.774383	0.438705	0.738469
ENSG00000092010	3699.59	0.498245	0.197004	2.52911	0.0114353	0.119285
ENSG00000092020	1907.76	-0.039936	0.182533	-0.218788	0.826815	0.938468
ENSG00000092036	687.769	0.517053	0.215402	2.40041	0.0163768	0.144776
ENSG00000092094	1808.44	1.25286	0.258256	4.85125	1.22685e-06	0.000326414
ENSG00000092098	429.688	0.210358	0.200879	1.04719	0.295012	0.627922
ENSG00000092108	15536.5	-0.723775	0.178935	-4.0449	5.23454e-05	0.00363919
ENSG00000092140	5506.32	-0.39295	0.162275	-2.42151	0.0154562	0.140313
ENSG00000092148	8920.85	-0.52189	0.20113	-2.59479	0.00946483	0.105911
ENSG00000092199	22161.6	0.127516	0.153191	0.832395	0.405186	0.718225
ENSG00000092200	256.225	-0.0827751	0.267886	-0.308994	0.757326	0.909874
ENSG00000092201	4286.34	-0.703397	0.198516	-3.54327	0.000395195	0.0143129
ENSG00000092203	3489.45	-0.215174	0.196087	-1.09734	0.272492	0.602722
ENSG00000092208	1060.95	0.0536761	0.210878	0.254536	0.799081	0.928548
ENSG00000092295	48.2744	-0.0808485	0.546558	-0.147923	0.882403	0.956519
ENSG00000092330	1257.84	0.231652	0.182103	1.27209	0.203341	0.536886
ENSG00000092421	1633.37	-0.26938	0.213071	-1.26427	0.206132	0.540326
ENSG00000092439	3590.92	-0.301686	0.168558	-1.7898	0.0734855	0.331812
ENSG00000092445	4359.41	-0.030274	0.157984	-0.191627	0.848034	0.943533
ENSG00000092470	907.807	-0.411489	0.240053	-1.71416	0.0864995	0.35655
ENSG00000092531	3752.74	0.255977	0.156893	1.63154	0.102777	0.389035
ENSG00000092621	6418.43	-0.463645	0.180355	-2.57073	0.0101485	0.11117
ENSG00000092758	44.7156	0.6325	0.502496	1.25872	0.208133	0.542486
ENSG00000092820	2370.47	-0.231843	0.279455	-0.829625	0.406751	0.71907
ENSG00000092841	57604.3	0.120805	0.304445	0.396804	0.691512	0.882667
ENSG00000092847	5290.82	0.0300172	0.213557	0.140558	0.888219	0.957897
ENSG00000092853	1523.58	-0.790513	0.254401	-3.10735	0.00188771	0.0386339
ENSG00000092871	8633.77	-0.185139	0.168545	-1.09845	0.272007	0.602275
ENSG00000092931	561.164	0.315644	0.22003	1.43455	0.151415	0.472022
ENSG00000092964	1258.75	-0.0489378	0.190809	-0.256475	0.797584	0.927837
ENSG00000092969	355.998	0.0300664	0.347876	0.0864287	0.931126	0.973779
ENSG00000092978	1442.77	-0.179612	0.177387	-1.01254	0.311278	0.641808
ENSG00000093000	6967.2	-0.34002	0.16796	-2.02441	0.0429282	0.249752
ENSG00000093009	1676.59	0.0711701	0.183824	0.387164	0.698634	0.886099
ENSG00000093010	1151.83	0.754552	0.313217	2.40904	0.0159947	0.143042
ENSG00000093134	380.417	0.396365	0.203046	1.95209	0.0509271	0.272247
ENSG00000093144	4348.45	-0.0163883	0.173573	-0.0944178	0.924777	0.971002
ENSG00000093167	3511.14	-0.204767	0.200345	-1.02207	0.306747	0.639325
ENSG00000093183	3078.62	0.064734	0.20511	0.315607	0.752301	0.907571
ENSG00000093217	2173.39	-0.484281	0.186014	-2.60347	0.00922863	0.104142
ENSG00000094631	2405.11	0.242479	0.203216	1.19321	0.232788	0.567211
ENSG00000094804	5397.49	0.0403658	0.158834	0.254138	0.799389	0.928671
ENSG00000094880	2264.34	-0.538566	0.191453	-2.81304	0.00490753	0.0690797
ENSG00000094914	1459.62	0.248544	0.198538	1.25187	0.210617	0.546115
ENSG00000094916	12667.5	0.0398692	0.224453	0.177628	0.859015	0.947876
ENSG00000094975	3169.21	-0.453318	0.226923	-1.99768	0.0457517	0.257936
ENSG00000095002	1266.93	-0.347342	0.200402	-1.73323	0.0830556	0.349746
ENSG00000095015	831.547	-0.487901	0.196383	-2.48443	0.0129758	0.1275
ENSG00000095059	2000.34	0.567028	0.217281	2.60965	0.00906346	0.10295
ENSG00000095066	241.342	-0.233159	0.313725	-0.743197	0.457362	0.752356
ENSG00000095139	6402.85	-0.534511	0.161267	-3.31445	0.000918225	0.0256437
ENSG00000095203	3655.92	-0.177661	0.176483	-1.00667	0.314091	0.644023
ENSG00000095209	2680.75	0.0547242	0.138703	0.394543	0.69318	0.883721
ENSG00000095261	5188.85	-0.375432	0.177652	-2.11331	0.0345746	0.221136
ENSG00000095319	3586.45	-0.367112	0.145621	-2.52101	0.0117018	0.120817
ENSG00000095321	1549.4	0.107448	0.190585	0.563777	0.572906	0.822912
ENSG00000095380	2579.45	-0.00998398	0.182363	-0.0547479	0.956339	0.983377
ENSG00000095383	164.046	-0.19731	0.382214	-0.51623	0.605694	0.839561
ENSG00000095485	1657.94	-0.127164	0.204138	-0.622928	0.533332	0.798123
ENSG00000095539	7231.17	0.23004	0.188819	1.21831	0.223107	0.556955
ENSG00000095564	2344.33	-0.0116732	0.265518	-0.0439641	0.964933	0.986789
ENSG00000095574	1833.32	-0.34315	0.143025	-2.39923	0.0164298	0.145058
ENSG00000095637	849.059	-0.532164	0.180674	-2.94543	0.00322503	0.0534963
ENSG00000095739	6069.89	0.349765	0.271258	1.28942	0.197253	0.529903
ENSG00000095787	14725.8	-0.0280616	0.202256	-0.138743	0.889654	0.958371
ENSG00000095794	1656.05	0.0138184	0.20498	0.0674134	0.946253	0.979603
ENSG00000095906	1781.83	0.633202	0.669493	0.945794	0.344254	0.667987
ENSG00000095951	750.57	0.0997032	0.1827	0.545721	0.585257	0.828636
ENSG00000096006	68.9048	0.0400565	0.400859	0.0999267	0.920402	0.969232
ENSG00000096060	1063.75	-0.251852	0.228214	-1.10358	0.269777	0.600743
ENSG00000096063	5360.39	-0.49128	0.164537	-2.98584	0.00282804	0.0494015
ENSG00000096070	3011.23	-0.164586	0.156451	-1.052	0.292801	0.625332
ENSG00000096080	1408.29	0.204725	0.168803	1.21281	0.225204	0.559074
ENSG00000096088	383.136	-0.242517	0.285327	-0.849962	0.395346	0.710432
ENSG00000096092	2382.09	0.189163	0.200423	0.943817	0.345263	0.668827
ENSG00000096093	307.749	-0.0152243	0.200436	-0.0759558	0.939454	0.976776
ENSG00000096384	19448.9	-0.543337	0.222304	-2.44411	0.0145209	0.135741
ENSG00000096401	1456.83	-0.352121	0.193343	-1.82122	0.0685727	0.319752
ENSG00000096433	380.968	0.0778311	0.357559	0.217673	0.827684	0.938976
ENSG00000096654	408.663	-0.208488	0.224685	-0.92791	0.353454	0.674767
ENSG00000096696	1180.6	-0.576174	0.262483	-2.19509	0.028157	0.196644
ENSG00000096717	1239.42	-0.700524	0.167484	-4.18264	2.88141e-05	0.00237287
ENSG00000096746	8070.6	-0.0134363	0.187766	-0.0715589	0.942953	0.978236
ENSG00000096872	251.149	-0.774017	0.230744	-3.35444	0.00079527	0.0232121
ENSG00000096968	271.361	-0.453511	0.218665	-2.07399	0.0380798	0.234357
ENSG00000097007	4658.9	-0.0888746	0.190521	-0.466483	0.64087	0.85807
ENSG00000097021	2204.28	0.245348	0.260004	0.943631	0.345358	0.668911
ENSG00000097033	3612.88	-0.148008	0.278262	-0.531903	0.594793	0.834284
ENSG00000097046	1866.69	-0.0840008	0.139368	-0.602728	0.54669	0.80521
ENSG00000097096	498.462	-0.28971	0.240253	-1.20585	0.227874	0.561866
ENSG00000099139	478.759	-0.163063	0.319268	-0.51074	0.609533	0.84087
ENSG00000099194	112082	-0.498385	0.182979	-2.72373	0.00645496	0.0822982
ENSG00000099203	1244.49	0.386128	0.29195	1.32258	0.185974	0.514899
ENSG00000099204	6625.19	-0.0962665	0.197502	-0.487419	0.625961	0.84962
ENSG00000099219	1515.6	-0.396874	0.161655	-2.45507	0.0140856	0.133202
ENSG00000099246	2915.02	0.0259499	0.225386	0.115135	0.908338	0.965844
ENSG00000099250	3002.71	-0.213602	0.16794	-1.2719	0.203409	0.536886
ENSG00000099251	746.591	0.248488	0.212644	1.16856	0.242579	0.576746
ENSG00000099256	1884.83	0.203256	0.171934	1.18218	0.237136	0.571764
ENSG00000099260	1024.99	-0.484805	0.368162	-1.31682	0.187897	0.517223
ENSG00000099282	266.541	0.423924	0.441786	0.959568	0.337273	0.662168
ENSG00000099284	1035.58	0.306777	0.241447	1.27058	0.203879	0.537441
ENSG00000099290	542.888	-0.488725	0.194557	-2.51199	0.0120053	0.122491
ENSG00000099308	442.734	0.118507	0.245066	0.483572	0.62869	0.850699
ENSG00000099326	327.521	0.362855	0.394421	0.919968	0.357589	0.679059
ENSG00000099330	658.575	0.474756	0.258169	1.83893	0.0659249	0.312431
ENSG00000099331	1552.51	-0.668496	0.269006	-2.48506	0.0129529	0.1275
ENSG00000099341	11605.5	0.430515	0.197821	2.17629	0.0295335	0.202476
ENSG00000099364	294.789	0.560599	0.328223	1.70798	0.0876393	0.359043
ENSG00000099377	264.751	0.684426	0.297578	2.29999	0.0214488	0.168797
ENSG00000099381	1285.47	-0.2983	0.285294	-1.04559	0.295751	0.628542
ENSG00000099385	895.126	0.684529	0.596742	1.14711	0.251336	0.584814
ENSG00000099399	852.68	0.123168	0.180275	0.68322	0.494468	0.774677
ENSG00000099617	116.353	0.930904	0.472245	1.97123	0.0486972	0.26799
ENSG00000099622	5240.7	0.916442	0.169066	5.42061	5.93974e-08	7.1912e-05
ENSG00000099624	1946.54	0.797113	0.580888	1.37223	0.169991	0.493563
ENSG00000099625	77.884	0.610822	0.609183	1.00269	0.316011	0.645597
ENSG00000099783	4606.93	-0.929804	0.196987	-4.72014	2.35688e-06	0.000525926
ENSG00000099785	759.827	0.567455	0.32642	1.73842	0.0821371	0.348608
ENSG00000099795	2449.09	0.767714	0.685769	1.11949	0.26293	0.594968
ENSG00000099797	6248.42	0.234179	0.212605	1.10148	0.27069	0.601375
ENSG00000099800	4488.89	0.4792	0.378748	1.26522	0.205793	0.54005
ENSG00000099804	3487.62	0.356469	0.226601	1.57311	0.115692	0.414556
ENSG00000099810	2319.63	-0.13297	0.169736	-0.783397	0.433394	0.735681
ENSG00000099814	672.445	0.261832	0.323989	0.808149	0.419005	0.726457
ENSG00000099817	7546.68	0.509833	0.330292	1.54359	0.122689	0.427664
ENSG00000099821	1045.25	0.245792	0.300295	0.818499	0.413072	0.72274
ENSG00000099822	158.149	-0.255191	0.371007	-0.687834	0.491558	0.77307
ENSG00000099849	615.391	1.19143	0.412866	2.88576	0.00390475	0.0594959
ENSG00000099860	492.06	1.09974	0.360549	3.05018	0.00228705	0.0434037
ENSG00000099864	665.092	0.107316	0.402183	0.266835	0.789596	0.924792
ENSG00000099869	79.8604	0.484204	0.396336	1.2217	0.22182	0.556159
ENSG00000099875	3083.56	0.175419	0.27746	0.632231	0.527236	0.793945
ENSG00000099889	202.566	0.498209	0.450968	1.10475	0.269267	0.600364
ENSG00000099899	1221.73	0.822163	0.292563	2.8102	0.004951	0.0695402
ENSG00000099901	15429	0.285645	0.154141	1.85314	0.063863	0.307073
ENSG00000099904	630.591	1.04816	0.621273	1.68713	0.0915793	0.366293
ENSG00000099910	328.3	-0.27111	0.228169	-1.1882	0.234755	0.569796
ENSG00000099917	1077.36	0.0708536	0.282486	0.250821	0.801952	0.930165
ENSG00000099937	3570.32	-0.545899	0.1766	-3.09117	0.00199372	0.0400108
ENSG00000099940	3059.4	-0.0788583	0.184534	-0.427338	0.669133	0.873488
ENSG00000099942	8159.59	0.0846792	0.197587	0.428567	0.668238	0.872757
ENSG00000099949	1133.4	0.329606	0.278972	1.1815	0.237404	0.571911
ENSG00000099953	586.626	0.153711	0.301711	0.509463	0.610428	0.841246
ENSG00000099954	1633.73	-0.489172	0.170769	-2.86452	0.00417645	0.0621303
ENSG00000099956	4010.37	0.294926	0.16311	1.80815	0.0705835	0.324346
ENSG00000099968	7019.15	-0.209649	0.167605	-1.25085	0.210988	0.546369
ENSG00000099977	7265.89	0.0478166	0.263632	0.181377	0.856072	0.946487
ENSG00000099991	1419.34	-0.0688868	0.288462	-0.238807	0.811255	0.933195
ENSG00000099992	133.09	0.102791	0.29521	0.348198	0.727692	0.897612
ENSG00000099995	3306.9	-0.549367	0.175007	-3.13912	0.00169458	0.0368624
ENSG00000099999	167.126	0.46866	0.352066	1.33117	0.183133	0.511433
ENSG00000100014	1641.91	-0.19536	0.211347	-0.924356	0.355301	0.676612
ENSG00000100023	1679.7	-0.244501	0.1612	-1.51676	0.129328	0.438973
ENSG00000100024	1199.97	0.340459	0.253883	1.341	0.179919	0.506926
ENSG00000100027	173.456	-0.1297	0.286277	-0.453057	0.650508	0.862381
ENSG00000100028	11188.6	0.167016	0.18288	0.913258	0.361107	0.681664
ENSG00000100029	2621.73	-0.59023	0.166267	-3.54989	0.000385391	0.0141055
ENSG00000100030	8303.02	-0.121843	0.207715	-0.586586	0.557482	0.811442
ENSG00000100031	184.38	-0.290989	0.449243	-0.647732	0.517158	0.788545
ENSG00000100034	1172.36	0.500057	0.20791	2.40516	0.0161653	0.143456
ENSG00000100038	1153.06	0.299424	0.212947	1.4061	0.159694	0.482156
ENSG00000100056	1008.1	0.063787	0.197046	0.323716	0.746153	0.905262
ENSG00000100058	1381.43	0.0290819	0.169466	0.171609	0.863745	0.950204
ENSG00000100065	1029.13	-0.084037	0.280413	-0.29969	0.764413	0.91256
ENSG00000100068	255.62	-0.0353955	0.371507	-0.0952755	0.924096	0.970938
ENSG00000100075	8625.97	0.255014	0.182789	1.39513	0.162977	0.485375
ENSG00000100077	1152.33	-0.308398	0.176349	-1.74879	0.0803267	0.34678
ENSG00000100079	343.326	0.210037	0.619733	0.338915	0.734674	0.900604
ENSG00000100083	2467.2	0.0437086	0.216975	0.201446	0.84035	0.941091
ENSG00000100084	992.602	0.170151	0.23755	0.716277	0.473821	0.761366
ENSG00000100092	922.949	0.190923	0.275075	0.694076	0.487635	0.77061
ENSG00000100097	92.4422	-0.252214	0.768568	-0.328161	0.74279	0.90337
ENSG00000100099	2413.44	0.0777453	0.168384	0.461714	0.644287	0.859349
ENSG00000100100	77.9009	0.456352	0.406423	1.12285	0.261501	0.593436
ENSG00000100104	3130.68	-0.000497205	0.179365	-0.00277204	0.997788	0.999088
ENSG00000100105	1821.51	0.120283	0.146689	0.819991	0.412221	0.72274
ENSG00000100106	1366.07	0.43622	0.235001	1.85625	0.0634182	0.305882
ENSG00000100109	651.811	-0.0212323	0.198866	-0.106767	0.914974	0.967565
ENSG00000100116	1962.2	0.439869	0.293128	1.5006	0.133458	0.446581
ENSG00000100124	1420.43	0.300206	0.146968	2.04266	0.0410859	0.243072
ENSG00000100129	19115.6	-0.219419	0.178936	-1.22625	0.220106	0.554679
ENSG00000100138	17048.2	0.111316	0.203119	0.548033	0.583669	0.827851
ENSG00000100139	968.031	-0.0950852	0.255226	-0.372553	0.709481	0.890473
ENSG00000100147	204.907	-0.329016	0.277501	-1.18564	0.235765	0.570441
ENSG00000100150	754.561	-0.172044	0.159914	-1.07585	0.281992	0.614098
ENSG00000100151	313.128	0.237964	0.252638	0.941917	0.346235	0.669205
ENSG00000100154	818.696	-0.297401	0.2169	-1.37114	0.17033	0.493718
ENSG00000100162	1541.57	0.483743	0.280841	1.72248	0.0849824	0.353848
ENSG00000100196	2613.65	0.201004	0.227463	0.88368	0.376869	0.695397
ENSG00000100201	15689.8	-0.148149	0.361745	-0.40954	0.682143	0.878958
ENSG00000100207	2713.28	-0.210472	0.178419	-1.17965	0.238141	0.572758
ENSG00000100209	1089.18	0.178378	0.196043	0.90989	0.36288	0.682405
ENSG00000100211	1737.3	0.215028	0.220319	0.975985	0.329072	0.655851
ENSG00000100216	16013.4	0.0648747	0.215293	0.301332	0.763161	0.911899
ENSG00000100219	45867.7	-0.0201659	0.201631	-0.100014	0.920333	0.969232
ENSG00000100220	3426.7	-0.803354	0.220812	-3.63818	0.000274574	0.0113395
ENSG00000100221	6964.76	0.274571	0.149319	1.83882	0.0659413	0.312431
ENSG00000100225	8685.68	-0.255392	0.16846	-1.51604	0.12951	0.439208
ENSG00000100226	2175.77	-0.264548	0.170258	-1.55381	0.12023	0.42336
ENSG00000100227	3949.95	-0.284518	0.198479	-1.43349	0.151719	0.472427
ENSG00000100234	3509.88	0.0736998	0.161772	0.455578	0.648693	0.861624
ENSG00000100239	6739.87	0.315403	0.235576	1.33886	0.180617	0.50782
ENSG00000100241	4338.83	0.193338	0.372586	0.518909	0.603824	0.838731
ENSG00000100242	1160.55	-0.180257	0.202294	-0.891066	0.372894	0.691089
ENSG00000100243	6509.07	0.346341	0.239948	1.4434	0.148906	0.46788
ENSG00000100246	689.686	0.320114	0.219995	1.45509	0.145644	0.463023
ENSG00000100258	1332.27	0.594589	0.522729	1.13747	0.255342	0.588383
ENSG00000100263	3572.44	0.463517	0.245556	1.88762	0.0590772	0.294216
ENSG00000100266	2863.53	-0.51445	0.146054	-3.52232	0.000427792	0.0151272
ENSG00000100271	230.36	0.363264	0.279361	1.30034	0.193486	0.524785
ENSG00000100280	4959.42	-0.361017	0.180155	-2.00392	0.0450781	0.255911
ENSG00000100281	2894.82	-0.485825	0.200198	-2.42672	0.0152362	0.139045
ENSG00000100284	2111.85	-0.344507	0.282017	-1.22158	0.221866	0.556172
ENSG00000100292	2915.21	0.282088	0.249836	1.12909	0.258859	0.591756
ENSG00000100294	612.152	-0.0448644	0.210772	-0.212857	0.831438	0.940108
ENSG00000100296	5263.84	-0.197685	0.175905	-1.12382	0.26109	0.593329
ENSG00000100297	2676.42	-0.275089	0.21957	-1.25285	0.210259	0.545767
ENSG00000100299	225.442	1.00139	0.348015	2.87744	0.00400921	0.060554
ENSG00000100300	76.9197	0.870958	0.498126	1.74847	0.0803829	0.34678
ENSG00000100304	3228.74	-0.0743938	0.232327	-0.320211	0.748808	0.905992
ENSG00000100307	186.47	0.378402	0.476384	0.794322	0.427008	0.732639
ENSG00000100316	84392.2	-0.0493768	0.269841	-0.182985	0.85481	0.946018
ENSG00000100319	938.499	0.534929	0.24266	2.20444	0.0274931	0.194164
ENSG00000100320	3780.36	-0.231689	0.187925	-1.23288	0.21762	0.552151
ENSG00000100321	160.051	0.468632	0.424372	1.1043	0.269464	0.600425
ENSG00000100324	1457.1	-0.281119	0.21486	-1.30838	0.190743	0.520603
ENSG00000100325	3219.08	-0.313868	0.152546	-2.05753	0.0396349	0.239036
ENSG00000100330	1840.46	-0.159644	0.184486	-0.865346	0.386849	0.704393
ENSG00000100335	7133.92	-0.096535	0.192372	-0.501814	0.615799	0.843761
ENSG00000100344	1300.85	-0.191306	0.193016	-0.99114	0.321617	0.650808
ENSG00000100345	3465.75	-0.186517	0.590817	-0.315693	0.752236	0.907571
ENSG00000100347	1894.01	-0.175899	0.188294	-0.934172	0.350215	0.672272
ENSG00000100348	4575.94	0.272217	0.18276	1.48948	0.136362	0.451009
ENSG00000100350	1581.95	0.0309978	0.139759	0.221796	0.824473	0.938064
ENSG00000100353	6492.43	-0.322155	0.159415	-2.02085	0.0432952	0.250413
ENSG00000100354	1161.15	-0.183251	0.226081	-0.810555	0.417621	0.725671
ENSG00000100359	1879.56	0.392541	0.321013	1.22282	0.221398	0.555504
ENSG00000100360	198.722	0.696437	0.518384	1.34348	0.179117	0.506669
ENSG00000100364	2644.42	0.14528	0.168777	0.860784	0.389357	0.705501
ENSG00000100372	1495.21	0.125963	0.19197	0.656162	0.51172	0.785089
ENSG00000100373	221.728	0.4317	0.392857	1.09887	0.271823	0.602275
ENSG00000100376	2885.86	0.235335	0.162524	1.448	0.147616	0.465951
ENSG00000100379	665.378	0.55395	0.260214	2.12882	0.033269	0.216504
ENSG00000100380	7088.58	-0.314047	0.181696	-1.72842	0.0839121	0.351928
ENSG00000100387	11999.8	-0.0672021	0.287409	-0.233821	0.815124	0.93452
ENSG00000100393	2401.83	-0.647315	0.222972	-2.90312	0.00369469	0.0578235
ENSG00000100395	2265.41	-0.147212	0.147689	-0.996767	0.318878	0.647633
ENSG00000100401	3486.03	-0.0134687	0.193249	-0.069696	0.944436	0.978747
ENSG00000100403	4546.81	-0.0200256	0.209636	-0.0955258	0.923897	0.970938
ENSG00000100410	8748.64	-0.177654	0.221221	-0.803063	0.421938	0.729028
ENSG00000100412	6677.48	0.0108083	0.295157	0.0366188	0.970789	0.989601
ENSG00000100413	2413.03	0.226138	0.14489	1.56075	0.118582	0.420017
ENSG00000100416	2272.68	0.284863	0.144929	1.96554	0.0493522	0.269065
ENSG00000100417	1264.92	0.519211	0.230021	2.25723	0.0239938	0.179435
ENSG00000100418	5114.86	0.260548	0.196368	1.32684	0.184563	0.513319
ENSG00000100422	6957.19	0.178024	0.14372	1.23869	0.215461	0.550226
ENSG00000100425	1550.79	-0.0567446	0.271735	-0.208823	0.834586	0.940786
ENSG00000100426	4610.48	-0.175646	0.13136	-1.33714	0.181178	0.508129
ENSG00000100439	4282.61	0.108701	0.182252	0.596434	0.550885	0.807451
ENSG00000100441	2655.83	0.0514908	0.227014	0.226818	0.820566	0.937296
ENSG00000100442	3916.42	0.34789	0.202426	1.7186	0.085687	0.355466
ENSG00000100445	855.685	0.716002	0.206034	3.47517	0.000510534	0.0171438
ENSG00000100461	250.013	-0.0773634	0.291242	-0.265633	0.790522	0.925001
ENSG00000100462	3425.26	-0.527952	0.194513	-2.71422	0.00664316	0.0839344
ENSG00000100473	3333.86	-0.388261	0.193653	-2.00493	0.0449704	0.25585
ENSG00000100478	2233.27	-0.192224	0.220001	-0.87374	0.38226	0.700148
ENSG00000100479	953.469	-0.378259	0.199523	-1.89582	0.0579844	0.29129
ENSG00000100483	899.5	0.0878473	0.176426	0.497927	0.618535	0.844944
ENSG00000100485	1012.62	-0.180024	0.221251	-0.813664	0.415838	0.724391
ENSG00000100490	73.535	0.230897	0.357438	0.645978	0.518294	0.788834
ENSG00000100503	970.015	-0.51316	0.28402	-1.80677	0.0707974	0.324622
ENSG00000100504	4433.85	-0.603706	0.172271	-3.5044	0.000457646	0.0157479
ENSG00000100519	6072.75	-0.270095	0.220198	-1.2266	0.219973	0.554679
ENSG00000100522	4543.97	0.0935075	0.176758	0.529015	0.596795	0.835396
ENSG00000100523	567.935	-0.312096	0.176396	-1.7693	0.0768441	0.339119
ENSG00000100526	6826.14	0.117194	0.221188	0.529841	0.596222	0.835176
ENSG00000100528	9530.75	0.104998	0.189009	0.555517	0.578541	0.824486
ENSG00000100532	653.332	0.0313835	0.236954	0.132446	0.894632	0.959907
ENSG00000100554	1341.85	-0.0261686	0.240346	-0.108879	0.913299	0.967051
ENSG00000100557	538.213	-0.161237	0.587286	-0.274547	0.783664	0.922951
ENSG00000100564	844.103	0.016178	0.180969	0.0893966	0.928767	0.972323
ENSG00000100567	9063.79	0.0779512	0.211497	0.368568	0.71245	0.89191
ENSG00000100568	6905.29	-0.0538848	0.199977	-0.269454	0.78758	0.924197
ENSG00000100575	3670.34	0.27565	0.204132	1.35035	0.176903	0.5038
ENSG00000100577	458.559	0.507579	0.215492	2.35544	0.0185008	0.155999
ENSG00000100578	1215.96	-0.27992	0.180149	-1.55382	0.120226	0.42336
ENSG00000100580	1001.06	-0.296186	0.220889	-1.34089	0.179958	0.506926
ENSG00000100591	6147.63	0.076429	0.213449	0.358067	0.720293	0.894755
ENSG00000100592	951.876	-0.518303	0.276163	-1.8768	0.0605454	0.297883
ENSG00000100596	498.452	-0.783064	0.24391	-3.21046	0.00132521	0.0322786
ENSG00000100599	286.919	0.148434	0.275633	0.538521	0.590218	0.832458
ENSG00000100600	510.668	-0.394374	0.204805	-1.9256	0.0541542	0.280608
ENSG00000100601	867.006	-0.200011	0.245323	-0.815297	0.414902	0.723996
ENSG00000100603	2308.77	-0.676782	0.190466	-3.5533	0.000380437	0.0139611
ENSG00000100605	1224.57	0.46985	0.340206	1.38107	0.167256	0.490772
ENSG00000100612	3437.89	-0.154739	0.312137	-0.49574	0.620078	0.84595
ENSG00000100614	2476.92	-0.115619	0.137372	-0.841649	0.399985	0.7146
ENSG00000100625	308.854	0.141826	0.233092	0.608457	0.542884	0.802869
ENSG00000100626	60.6889	0.580794	0.382252	1.5194	0.128662	0.437571
ENSG00000100629	326.91	-0.570475	0.232943	-2.44899	0.0143257	0.13437
ENSG00000100632	17713.6	0.0677127	0.210419	0.321799	0.747605	0.905474
ENSG00000100644	5127.87	-0.418418	0.211603	-1.97738	0.047999	0.265414
ENSG00000100647	334.98	0.243602	0.202713	1.20171	0.229477	0.56368
ENSG00000100650	6732.37	0.762365	0.24602	3.09879	0.00194315	0.0393033
ENSG00000100664	17976.2	-0.0572278	0.177356	-0.322672	0.746944	0.905367
ENSG00000100665	551.823	-0.240018	0.214918	-1.11679	0.264085	0.596122
ENSG00000100697	1007.31	-0.376869	0.205275	-1.83592	0.0663699	0.313362
ENSG00000100711	1228.7	0.20938	0.182375	1.14808	0.250937	0.584367
ENSG00000100714	1410.65	-0.290078	0.205037	-1.41476	0.157139	0.478457
ENSG00000100722	3551.53	-0.345451	0.199153	-1.73461	0.0828107	0.349746
ENSG00000100726	321.267	0.176389	0.427603	0.412506	0.679969	0.877937
ENSG00000100731	1812.06	-0.259703	0.169024	-1.53649	0.124419	0.43036
ENSG00000100744	1287.61	0.166678	0.229207	0.727194	0.467107	0.757967
ENSG00000100749	1242.38	-0.471933	0.188888	-2.49849	0.0124725	0.124456
ENSG00000100764	2317.91	-0.557131	0.216791	-2.5699	0.0101728	0.11117
ENSG00000100767	50.1394	-0.477258	0.405037	-1.17831	0.238674	0.573437
ENSG00000100796	4181.3	-0.481426	0.172572	-2.78971	0.00527549	0.0726233
ENSG00000100802	548.75	0.357706	0.195993	1.8251	0.0679861	0.318472
ENSG00000100804	14199	0.271207	0.186323	1.45558	0.14551	0.463023
ENSG00000100811	4353.71	-0.326109	0.195918	-1.66452	0.0960089	0.37437
ENSG00000100813	9831.4	-0.311461	0.186439	-1.67058	0.094805	0.372274
ENSG00000100814	17878.6	-0.118473	0.175286	-0.675883	0.499115	0.777444
ENSG00000100815	1170.85	-0.910043	0.207155	-4.39305	1.11773e-05	0.00137049
ENSG00000100823	11566.3	0.857654	0.208888	4.10581	4.02904e-05	0.0029836
ENSG00000100836	4775.18	0.53801	0.171659	3.13418	0.00172334	0.037312
ENSG00000100852	30829	-0.300577	0.194156	-1.54812	0.121593	0.425774
ENSG00000100865	1567.69	0.209414	0.224095	0.934488	0.350052	0.672169
ENSG00000100883	973.309	-0.465361	0.187286	-2.48476	0.0129639	0.1275
ENSG00000100888	2697.53	-0.463889	0.198974	-2.3314	0.0197322	0.161249
ENSG00000100889	1381	-0.37665	0.212611	-1.77155	0.0764697	0.33898
ENSG00000100890	117.618	-0.444346	0.30575	-1.4533	0.146141	0.463878
ENSG00000100897	4820.89	0.287257	0.148335	1.93654	0.0528018	0.277149
ENSG00000100902	401.039	0.241908	0.236678	1.0221	0.306735	0.639325
ENSG00000100906	2490.89	0.370257	0.221883	1.66871	0.0951755	0.372596
ENSG00000100908	567.396	0.581112	0.21498	2.7031	0.00686961	0.0856998
ENSG00000100911	4655.29	0.0864803	0.229026	0.3776	0.705728	0.889393
ENSG00000100916	936.105	-0.181106	0.183911	-0.984747	0.324748	0.652672
ENSG00000100926	251.14	0.448368	0.289977	1.54622	0.122052	0.426404
ENSG00000100934	4958.43	-0.514027	0.120129	-4.27896	1.87767e-05	0.00185554
ENSG00000100938	3927.9	0.0616193	0.173856	0.354427	0.723019	0.895614
ENSG00000100941	5921.03	-0.102159	0.273943	-0.372921	0.709207	0.890473
ENSG00000100949	636.127	0.235681	0.178234	1.32231	0.186064	0.514924
ENSG00000100979	1020.6	-0.372372	0.279338	-1.33305	0.182515	0.510533
ENSG00000100982	2312.97	-0.226925	0.224575	-1.01047	0.312271	0.642912
ENSG00000100983	2849.64	0.219111	0.180766	1.21213	0.225464	0.559314
ENSG00000100991	3894.7	-0.668975	0.14368	-4.65601	3.22401e-06	0.000651007
ENSG00000100994	2032.5	-0.228732	0.181801	-1.25815	0.208339	0.542914
ENSG00000100997	6992.47	0.116885	0.203949	0.573112	0.566569	0.818384
ENSG00000101003	5248.39	0.105616	0.183982	0.574055	0.565931	0.81806
ENSG00000101004	1752.76	-0.180548	0.264184	-0.683418	0.494342	0.774677
ENSG00000101019	3955.81	0.0959524	0.196303	0.488797	0.624985	0.849315
ENSG00000101040	3702.53	-0.289781	0.187571	-1.54491	0.122367	0.426974
ENSG00000101049	142.896	-0.00739432	0.346306	-0.021352	0.982965	0.994589
ENSG00000101052	1339.72	0.0775402	0.279052	0.27787	0.781112	0.92141
ENSG00000101057	10857.5	0.122274	0.273506	0.447061	0.654831	0.865004
ENSG00000101076	11724.5	0.00718931	0.15145	0.0474697	0.962139	0.985284
ENSG00000101079	2024.62	-0.0360995	0.172125	-0.209728	0.83388	0.940698
ENSG00000101084	1095.27	-0.00298942	0.289465	-0.0103274	0.99176	0.997021
ENSG00000101096	823.924	-0.00313106	0.199402	-0.0157023	0.987472	0.995992
ENSG00000101104	589.34	0.0946132	0.38196	0.247705	0.804363	0.930789
ENSG00000101109	3606.48	-0.237033	0.157266	-1.5072	0.131758	0.443672
ENSG00000101115	734.119	-0.0931086	0.322455	-0.288749	0.772774	0.91632
ENSG00000101126	3609.97	-0.0621664	0.142356	-0.436695	0.662332	0.869378
ENSG00000101132	5488.32	-0.260092	0.252784	-1.02891	0.303523	0.636264
ENSG00000101138	2069.35	-0.0939259	0.152828	-0.614585	0.538829	0.800277
ENSG00000101146	1635.61	-0.10698	0.1644	-0.65073	0.515221	0.787392
ENSG00000101150	6887.2	0.291244	0.173832	1.67544	0.0938483	0.370651
ENSG00000101152	2610.98	0.185081	0.155856	1.18751	0.235026	0.569904
ENSG00000101158	6734.95	0.195877	0.152393	1.28534	0.198673	0.531059
ENSG00000101160	5982.33	0.299024	0.234268	1.27642	0.201808	0.535033
ENSG00000101161	1815.12	-0.124941	0.198879	-0.628226	0.529856	0.796021
ENSG00000101166	1579.97	0.170268	0.205261	0.829518	0.406811	0.71907
ENSG00000101181	1557.86	-0.0926888	0.164336	-0.564021	0.57274	0.822912
ENSG00000101182	17742	0.296265	0.247727	1.19594	0.231722	0.565809
ENSG00000101189	4675.55	0.212167	0.185285	1.14509	0.252173	0.585372
ENSG00000101190	1011.11	-0.233117	0.205983	-1.13173	0.257749	0.590709
ENSG00000101191	2794.17	-0.309558	0.225405	-1.37334	0.169646	0.49287
ENSG00000101193	4737.7	0.326925	0.139963	2.33579	0.019502	0.160793
ENSG00000101194	5835.89	0.758272	0.299247	2.53394	0.0112789	0.118754
ENSG00000101199	2096.21	0.18241	0.307003	0.594164	0.552403	0.808216
ENSG00000101216	903.717	0.155502	0.258254	0.602127	0.547089	0.805526
ENSG00000101220	4241.27	0.404168	0.289638	1.39543	0.162887	0.485375
ENSG00000101224	5196.51	0.0213522	0.171594	0.124434	0.900972	0.962972
ENSG00000101230	317.338	0.108247	0.223283	0.484796	0.627821	0.850475
ENSG00000101236	1297.64	0.0127048	0.160028	0.0793908	0.936722	0.97585
ENSG00000101246	850.787	0.775259	0.220204	3.52064	0.000430511	0.0151272
ENSG00000101247	3137.13	-0.0131541	0.1871	-0.0703055	0.943951	0.97873
ENSG00000101255	8440.27	0.240465	0.20511	1.17238	0.241046	0.575474
ENSG00000101266	6179.66	-0.232228	0.169581	-1.36942	0.170867	0.494343
ENSG00000101290	3738.31	0.099928	0.145693	0.68588	0.492789	0.773951
ENSG00000101294	11686.1	0.0864165	0.180145	0.479705	0.631437	0.852315
ENSG00000101310	3373.34	-0.358231	0.200403	-1.78755	0.0738491	0.332428
ENSG00000101311	335.262	-0.229073	0.290971	-0.787273	0.431122	0.734378
ENSG00000101335	677.595	0.193468	0.375879	0.514709	0.606757	0.83988
ENSG00000101337	5578.2	-0.434637	0.152738	-2.84564	0.00443226	0.0648892
ENSG00000101343	1358.07	-0.482011	0.164438	-2.93127	0.00337575	0.0549127
ENSG00000101346	6449.24	-0.100868	0.167167	-0.603397	0.546245	0.805128
ENSG00000101347	809.404	-0.836698	0.189112	-4.42435	9.67345e-06	0.00127459
ENSG00000101350	6571.08	-0.354132	0.192199	-1.84253	0.0653973	0.310598
ENSG00000101353	87.1263	0.231438	0.337627	0.685484	0.493038	0.774079
ENSG00000101361	50389.4	0.742442	0.199437	3.72269	0.000197113	0.00894119
ENSG00000101363	4494.91	0.0329962	0.159173	0.207298	0.835777	0.940793
ENSG00000101365	3960.25	0.0752963	0.156748	0.480365	0.630968	0.852068
ENSG00000101367	12606.4	0.116201	0.212237	0.547504	0.584032	0.828048
ENSG00000101384	5324.71	0.254064	0.218311	1.16377	0.244517	0.578644
ENSG00000101391	2504.99	-0.00368689	0.217815	-0.0169267	0.986495	0.995722
ENSG00000101400	501.722	0.264157	0.247029	1.06933	0.28492	0.616977
ENSG00000101407	2691.53	-0.414278	0.177781	-2.33027	0.0197921	0.161452
ENSG00000101412	7663.72	0.0575662	0.122883	0.468462	0.639454	0.857585
ENSG00000101413	1782.07	-0.074539	0.193665	-0.384886	0.700322	0.886672
ENSG00000101417	2423.5	0.0682993	0.165341	0.41308	0.679548	0.877834
ENSG00000101421	4356.21	0.258931	0.241553	1.07194	0.283746	0.616422
ENSG00000101439	6313.55	0.417833	0.261468	1.59803	0.110037	0.403589
ENSG00000101442	584.219	-0.240733	0.224139	-1.07403	0.282807	0.615098
ENSG00000101444	14646.5	-0.200293	0.180894	-1.10724	0.268188	0.599002
ENSG00000101447	5491.26	-0.418983	0.179088	-2.33953	0.0193079	0.160147
ENSG00000101452	1409.63	-0.223719	0.181678	-1.23141	0.218171	0.55292
ENSG00000101457	1750.69	0.220773	0.15822	1.39535	0.16291	0.485375
ENSG00000101464	1728.47	-0.113236	0.178653	-0.633831	0.526191	0.793945
ENSG00000101473	1249.53	0.584449	0.24961	2.34144	0.0192093	0.159808
ENSG00000101474	6027.98	0.181927	0.196769	0.924574	0.355188	0.676612
ENSG00000101493	1027.56	0.193114	0.231063	0.835761	0.403289	0.716608
ENSG00000101544	1686.67	0.0634958	0.141621	0.448349	0.653901	0.864557
ENSG00000101546	868.423	0.16945	0.194161	0.872729	0.382811	0.700456
ENSG00000101557	8309.24	-0.473466	0.185303	-2.55509	0.0106161	0.114299
ENSG00000101558	10904	0.0817183	0.229583	0.355943	0.721883	0.8953
ENSG00000101574	1997.43	0.0759113	0.156429	0.485278	0.627479	0.850262
ENSG00000101577	8809.65	-0.338711	0.167544	-2.02162	0.0432156	0.250413
ENSG00000101596	3825.92	-0.395069	0.214683	-1.84025	0.065732	0.311866
ENSG00000101605	254.829	-0.365579	0.204658	-1.78629	0.0740518	0.332848
ENSG00000101608	22704.4	0.259142	0.208955	1.24018	0.214907	0.549691
ENSG00000101624	1530.32	-0.3061	0.165548	-1.84901	0.064456	0.308777
ENSG00000101639	3441.39	-0.2452	0.212568	-1.15351	0.248699	0.582812
ENSG00000101654	3352.33	-0.22305	0.172312	-1.29445	0.195509	0.527367
ENSG00000101665	1128.75	0.54514	0.265738	2.05141	0.0402266	0.239989
ENSG00000101670	1226.22	-0.203612	0.238572	-0.85346	0.393404	0.708253
ENSG00000101745	2106.97	-1.00791	0.207978	-4.84625	1.25818e-06	0.00032687
ENSG00000101751	609.417	0.179191	0.228539	0.784072	0.432998	0.735576
ENSG00000101752	1638.38	-0.472556	0.266902	-1.77052	0.0766403	0.33907
ENSG00000101773	3206.8	-0.379512	0.208571	-1.81958	0.068823	0.320281
ENSG00000101782	1529.96	-0.20899	0.194513	-1.07443	0.28263	0.614905
ENSG00000101811	634.527	-0.878179	0.216616	-4.05408	5.03318e-05	0.00353473
ENSG00000101843	1683.48	0.19595	0.220243	0.889698	0.373628	0.692172
ENSG00000101844	978.469	-0.163077	0.211239	-0.772002	0.440113	0.73976
ENSG00000101846	584.736	-0.157416	0.277732	-0.566789	0.570858	0.821491
ENSG00000101849	3933.61	-0.0289599	0.157625	-0.183727	0.854228	0.945913
ENSG00000101850	85.512	0.169491	0.320731	0.528452	0.597186	0.835396
ENSG00000101856	6589.81	0.260453	0.146348	1.77968	0.0751277	0.335504
ENSG00000101868	895.863	-0.579646	0.231947	-2.49905	0.0124528	0.124456
ENSG00000101871	639.835	-0.165797	0.219417	-0.755622	0.449876	0.747569
ENSG00000101882	589.133	-0.374457	0.173546	-2.15768	0.0309525	0.207978
ENSG00000101888	931.539	-0.0246571	0.20944	-0.117729	0.906283	0.965096
ENSG00000101898	87.2037	0.304313	0.342557	0.888357	0.374349	0.693043
ENSG00000101901	946.631	0.0890812	0.15851	0.56199	0.574123	0.823405
ENSG00000101928	1200.15	0.101491	0.250872	0.404555	0.685805	0.88041
ENSG00000101935	1158.34	-0.155647	0.190221	-0.818244	0.413218	0.72274
ENSG00000101940	1834.35	0.543863	0.268033	2.02909	0.042449	0.247799
ENSG00000101945	2894.55	0.0902466	0.135358	0.666724	0.504949	0.781753
ENSG00000101966	1142.19	-0.393211	0.220787	-1.78095	0.0749203	0.334885
ENSG00000101972	1976.3	-0.548551	0.176457	-3.10869	0.00187919	0.0385448
ENSG00000101986	174.76	0.290043	0.269329	1.07691	0.28152	0.613359
ENSG00000101997	374.838	0.170974	0.315255	0.542336	0.587587	0.830703
ENSG00000102003	165.77	0.512037	0.294351	1.73954	0.0819393	0.34838
ENSG00000102024	3107.04	-0.532299	0.22359	-2.38069	0.0172801	0.1497
ENSG00000102030	1024.93	0.537342	0.270775	1.98446	0.0472049	0.262703
ENSG00000102034	859.151	-0.146056	0.228791	-0.638381	0.523226	0.791734
ENSG00000102038	3961.8	-0.449168	0.186322	-2.41071	0.0159216	0.142782
ENSG00000102048	653.688	0.439451	0.193467	2.27145	0.0231199	0.175653
ENSG00000102054	3140.05	-0.187307	0.179235	-1.04504	0.296005	0.628585
ENSG00000102078	394.205	0.385291	0.226534	1.7008	0.0889796	0.361325
ENSG00000102081	2096	-0.2455	0.217624	-1.12809	0.259282	0.591925
ENSG00000102096	2628.01	0.503	0.200184	2.51269	0.0119814	0.122491
ENSG00000102098	828.334	-0.546695	0.213675	-2.55853	0.0105115	0.113438
ENSG00000102100	4110.84	0.227142	0.175339	1.29544	0.195167	0.526935
ENSG00000102103	4303.03	0.865294	0.168196	5.14455	2.6817e-07	0.000132505
ENSG00000102119	2234.35	0.41391	0.181236	2.28382	0.0223824	0.172995
ENSG00000102125	233.418	1.3975	0.297012	4.70519	2.53635e-06	0.000552208
ENSG00000102144	3973.37	-0.483403	0.170175	-2.84062	0.00450261	0.0655722
ENSG00000102158	1853.34	-0.235648	0.251131	-0.938348	0.348066	0.670016
ENSG00000102172	7969.24	-0.156951	0.188913	-0.830813	0.406079	0.718843
ENSG00000102174	59.7564	-0.250228	0.348416	-0.718188	0.472641	0.760741
ENSG00000102178	2120.05	0.0784295	0.180471	0.434582	0.663866	0.870329
ENSG00000102181	646.519	0.0269634	0.178648	0.15093	0.880031	0.955464
ENSG00000102189	1028.15	-0.543912	0.304474	-1.7864	0.0740352	0.332848
ENSG00000102218	854.224	-0.128269	0.249345	-0.514424	0.606956	0.839891
ENSG00000102221	863.797	-0.608711	0.215016	-2.831	0.00464026	0.0666309
ENSG00000102225	7207.52	0.313054	0.210705	1.48574	0.137347	0.451944
ENSG00000102226	977.919	-0.320886	0.161719	-1.98422	0.0472315	0.262745
ENSG00000102241	1220.73	-0.823823	0.216618	-3.80312	0.000142883	0.00726761
ENSG00000102302	122.512	-0.143899	0.360414	-0.399261	0.689701	0.882453
ENSG00000102309	4285.13	-0.00638777	0.23906	-0.0267204	0.978683	0.99259
ENSG00000102312	337.057	0.576282	0.249992	2.3052	0.0211552	0.167707
ENSG00000102316	1526.3	-0.299297	0.190857	-1.56818	0.11684	0.415976
ENSG00000102317	25776.3	0.929754	0.253005	3.67485	0.000237993	0.0101001
ENSG00000102359	77.9054	0.0612821	0.348496	0.175847	0.860414	0.948881
ENSG00000102362	49.9719	0.291586	0.37242	0.782951	0.433656	0.735681
ENSG00000102384	1477.1	-0.115778	0.177952	-0.650617	0.515294	0.787392
ENSG00000102393	3220.16	0.0313638	0.220564	0.142198	0.886924	0.957772
ENSG00000102401	1387.26	0.241599	0.179582	1.34534	0.178515	0.506616
ENSG00000102409	403.259	0.451953	0.277514	1.62858	0.103402	0.390161
ENSG00000102445	505.303	0.157442	0.26829	0.586835	0.557314	0.811338
ENSG00000102471	2176.17	0.21712	0.223405	0.971866	0.331117	0.656869
ENSG00000102524	55.1402	-0.402294	0.418797	-0.960594	0.336756	0.662058
ENSG00000102531	4011.98	-0.347589	0.174112	-1.99635	0.0458957	0.258012
ENSG00000102543	858.617	-0.153274	0.187455	-0.817656	0.413554	0.72293
ENSG00000102547	642.516	-0.258634	0.157525	-1.64186	0.100619	0.384439
ENSG00000102554	2483.68	0.0861727	0.202059	0.426474	0.669762	0.873599
ENSG00000102572	4659.62	-0.0717716	0.188072	-0.381617	0.702746	0.887913
ENSG00000102580	1516.62	-0.548853	0.186829	-2.93773	0.00330627	0.054213
ENSG00000102595	580.049	-0.362973	0.232255	-1.56282	0.118094	0.418932
ENSG00000102606	1427.37	-0.0789116	0.146388	-0.539057	0.589847	0.832326
ENSG00000102699	1259.88	-0.316847	0.231193	-1.37048	0.170536	0.49408
ENSG00000102710	2116.96	0.0311802	0.181958	0.171359	0.863941	0.950204
ENSG00000102738	691.162	0.0306206	0.21732	0.140901	0.887948	0.957897
ENSG00000102743	1134.05	-0.164768	0.185725	-0.88716	0.374993	0.693781
ENSG00000102753	2572.48	-0.557881	0.207412	-2.68973	0.00715095	0.0879408
ENSG00000102760	74.206	0.180509	0.355409	0.507891	0.611529	0.842226
ENSG00000102763	1706.55	-0.264822	0.187125	-1.41522	0.157005	0.478457
ENSG00000102780	322.065	-0.220621	0.263929	-0.835911	0.403205	0.716608
ENSG00000102781	626.977	-0.349597	0.205893	-1.69795	0.0895167	0.362489
ENSG00000102786	1946.19	-0.059688	0.229572	-0.259997	0.794866	0.927182
ENSG00000102796	437.874	0.298439	0.181598	1.64341	0.100299	0.384067
ENSG00000102804	3960.11	0.204982	0.142799	1.43546	0.151156	0.471426
ENSG00000102805	1135.03	-0.237999	0.200106	-1.18937	0.234296	0.56928
ENSG00000102858	1189.6	0.188967	0.277085	0.681981	0.495251	0.775154
ENSG00000102870	953.789	0.121456	0.231996	0.523525	0.600609	0.837439
ENSG00000102871	131.91	0.369407	0.31707	1.16506	0.243993	0.578454
ENSG00000102878	79.281	0.952972	0.45371	2.1004	0.0356939	0.225388
ENSG00000102882	1996.15	0.619112	0.172735	3.58418	0.000338143	0.0131042
ENSG00000102890	86.3555	0.872948	0.513938	1.69855	0.0894042	0.362304
ENSG00000102893	3682.55	-0.216389	0.146886	-1.47318	0.140703	0.457078
ENSG00000102897	2365.7	-0.145266	0.229708	-0.632392	0.527131	0.793945
ENSG00000102898	15206.2	0.366514	0.219848	1.66712	0.0954899	0.373404
ENSG00000102900	1639.37	-0.543634	0.165749	-3.27986	0.00103859	0.0276857
ENSG00000102901	1026.17	0.188318	0.226012	0.833223	0.404719	0.717765
ENSG00000102908	2040.18	-0.531023	0.205136	-2.58864	0.00963567	0.106986
ENSG00000102910	1554.46	-0.360187	0.216501	-1.66367	0.0961782	0.374613
ENSG00000102921	1459.34	-0.27938	0.146504	-1.90699	0.0565224	0.288126
ENSG00000102931	2067.22	0.0415034	0.213609	0.194296	0.845944	0.942777
ENSG00000102934	982.411	0.166976	0.231475	0.721355	0.470691	0.759332
ENSG00000102967	1101.01	-0.0943875	0.184547	-0.511456	0.609032	0.840494
ENSG00000102974	3023.08	-0.478569	0.15618	-3.06421	0.00218246	0.0421708
[truncated: 11,836 more rows]

## Sheet: Sig_diff_polysome_loading
	baseMean	log2FoldChange	lfcSE	stat	pvalue	padj
ENSG00000279759	44.6718	-1.458	0.535089	-2.72477	0.00643457	0.0822982
ENSG00000166477	2345.47	-1.42575	0.188404	-7.56752	3.80413e-14	5.26302e-10
ENSG00000080503	52.4036	-1.38199	0.511065	-2.70414	0.00684819	0.0856784
ENSG00000243955	81.0706	-1.3545	0.443514	-3.05403	0.00225791	0.0429686
ENSG00000080824	36379.1	-1.2637	0.300599	-4.20393	2.6232e-05	0.00224024
ENSG00000144674	10255.2	-1.25449	0.279465	-4.4889	7.15933e-06	0.00105372
ENSG00000249565	51.9777	-1.24844	0.408122	-3.05899	0.00222087	0.0427223
ENSG00000138778	1466.73	-1.24495	0.310313	-4.0119	6.02311e-05	0.00397701
ENSG00000251562	5878.93	-1.17848	0.320833	-3.67319	0.000239538	0.0101346
ENSG00000137776	3203.11	-1.1315	0.233613	-4.84348	1.27582e-06	0.00032687
ENSG00000134318	2629.32	-1.1242	0.215681	-5.21234	1.86478e-07	0.000117269
ENSG00000119397	1656.23	-1.11893	0.213221	-5.24777	1.53954e-07	0.000106498
ENSG00000107890	849.375	-1.11305	0.255999	-4.34787	1.37466e-05	0.00157177
ENSG00000255337	64.0292	-1.10514	0.371607	-2.97393	0.00294009	0.0503198
ENSG00000109063	259.173	-1.09812	0.329461	-3.33307	0.000858943	0.0244487
ENSG00000251204	57.6147	-1.08901	0.388483	-2.80323	0.00505928	0.0704177
ENSG00000087365	5200.53	-1.07017	0.15351	-6.97133	3.13958e-12	2.17181e-08
ENSG00000153922	1939.89	-1.04791	0.225409	-4.64895	3.33636e-06	0.000651007
ENSG00000091140	2930.14	-1.0394	0.214038	-4.85614	1.19698e-06	0.000324709
ENSG00000126777	11142.1	-1.03523	0.266338	-3.8869	0.000101534	0.0056672
ENSG00000135968	1221.35	-1.03266	0.251239	-4.11029	3.95164e-05	0.0029836
ENSG00000150093	7361.31	-1.02995	0.271014	-3.80038	0.000144477	0.00732174
ENSG00000148773	5494.15	-1.02213	0.262734	-3.89036	0.000100097	0.00565079
ENSG00000215252	594.984	-1.02181	0.32426	-3.1512	0.00162602	0.03588
ENSG00000181222	3519.34	-1.01705	0.241227	-4.21615	2.48511e-05	0.00220394
ENSG00000243444	74.3636	-1.01573	0.32671	-3.10896	0.00187747	0.0385448
ENSG00000101745	2106.97	-1.00791	0.207978	-4.84625	1.25818e-06	0.00032687
ENSG00000198707	698.865	-1.00782	0.244469	-4.1225	3.74779e-05	0.00288059
ENSG00000164221	169.406	-1.00554	0.238903	-4.20899	2.56509e-05	0.00223
ENSG00000078674	3304.69	-1.00083	0.184657	-5.41996	5.96124e-08	7.1912e-05
ENSG00000165813	842.52	-0.990942	0.203691	-4.86492	1.14501e-06	0.000316823
ENSG00000136861	4199.25	-0.990864	0.242805	-4.08091	4.48593e-05	0.00326646
ENSG00000103995	830.703	-0.98864	0.329388	-3.00145	0.00268701	0.0477825
ENSG00000260916	286.092	-0.986895	0.261212	-3.77814	0.000158005	0.00767278
ENSG00000175166	10645.2	-0.965713	0.229003	-4.21702	2.47547e-05	0.00220394
ENSG00000170004	1900.87	-0.965445	0.307478	-3.13988	0.00169018	0.0368246
ENSG00000138182	2155.89	-0.960584	0.265908	-3.61247	0.000303295	0.0121274
ENSG00000179979	280.596	-0.956142	0.335557	-2.84941	0.00437999	0.0643143
ENSG00000118557	135.312	-0.945093	0.293615	-3.21882	0.00128719	0.0317052
ENSG00000123200	1438.9	-0.941095	0.286144	-3.28889	0.00100584	0.0272106
ENSG00000167004	7082.19	-0.940513	0.266609	-3.52768	0.000419216	0.0149867
ENSG00000139116	4266.82	-0.939622	0.224035	-4.19409	2.73975e-05	0.00232542
ENSG00000121152	2442.97	-0.932938	0.15121	-6.1698	6.83745e-10	2.3649e-06
ENSG00000134709	1050.63	-0.931725	0.213941	-4.35505	1.33034e-05	0.00153984
ENSG00000108055	3435.61	-0.931453	0.233067	-3.9965	6.42855e-05	0.00415603
ENSG00000099783	4606.93	-0.929804	0.196987	-4.72014	2.35688e-06	0.000525926
ENSG00000132688	3396.26	-0.923894	0.27759	-3.32827	0.000873877	0.0247241
ENSG00000275835	1390.69	-0.923512	0.202322	-4.56456	5.00538e-06	0.000854931
ENSG00000259994	142.848	-0.918828	0.274113	-3.35201	0.000802275	0.0233182
ENSG00000133226	6714.67	-0.916096	0.208819	-4.38703	1.14909e-05	0.00137049
ENSG00000107581	5820.15	-0.913544	0.288239	-3.1694	0.00152754	0.034853
ENSG00000100815	1170.85	-0.910043	0.207155	-4.39305	1.11773e-05	0.00137049
ENSG00000117054	3082.07	-0.909709	0.196762	-4.62341	3.77489e-06	0.000705751
ENSG00000001497	1639.1	-0.906252	0.178711	-5.07106	3.95602e-07	0.000172886
ENSG00000087269	3684.54	-0.901152	0.171436	-5.25648	1.46838e-07	0.000106498
ENSG00000077097	4994.24	-0.896313	0.201008	-4.45909	8.23086e-06	0.00115347
ENSG00000125351	919.145	-0.89306	0.289998	-3.07954	0.00207324	0.0408012
ENSG00000115053	18492.2	-0.891998	0.189636	-4.70373	2.55449e-06	0.000552208
ENSG00000145734	1330.9	-0.891705	0.21865	-4.07823	4.53802e-05	0.0032871
ENSG00000278053	2635.81	-0.891124	0.210717	-4.22901	2.34717e-05	0.00213639
ENSG00000130779	2076.49	-0.888861	0.278482	-3.19181	0.00141387	0.0335051
ENSG00000132305	3405.35	-0.88352	0.178722	-4.94353	7.67197e-07	0.000246841
ENSG00000085224	2256.65	-0.881815	0.248816	-3.54405	0.000394031	0.0143082
ENSG00000121691	3323.33	-0.881517	0.156521	-5.63193	1.78204e-08	3.52207e-05
ENSG00000101811	634.527	-0.878179	0.216616	-4.05408	5.03318e-05	0.00353473
ENSG00000171241	943.187	-0.876029	0.21329	-4.10722	4.00458e-05	0.0029836
ENSG00000141027	3919.85	-0.875776	0.193759	-4.51992	6.18644e-06	0.000961678
ENSG00000048649	1132.13	-0.874108	0.205295	-4.25782	2.06428e-05	0.00196866
ENSG00000067900	3299.99	-0.874028	0.195553	-4.46952	7.83964e-06	0.00111816
ENSG00000089177	722.222	-0.873215	0.216868	-4.02648	5.66174e-05	0.00380244
ENSG00000198887	2064.81	-0.867063	0.208881	-4.15098	3.31048e-05	0.00261717
ENSG00000072571	1743.77	-0.860532	0.2775	-3.10102	0.00192856	0.0391673
ENSG00000148835	1068.81	-0.858461	0.174839	-4.91	9.10753e-07	0.000273919
ENSG00000156650	640.349	-0.855074	0.231119	-3.69971	0.000215848	0.00945017
ENSG00000130254	1509.73	-0.850515	0.260482	-3.26516	0.00109403	0.0285582
ENSG00000117724	4377.27	-0.849775	0.252636	-3.36364	0.000769232	0.0226432
ENSG00000103642	944.447	-0.84925	0.235756	-3.60224	0.000315488	0.0124708
ENSG00000082068	1715.27	-0.848443	0.173799	-4.88174	1.05153e-06	0.000296896
ENSG00000069329	3526.08	-0.847696	0.176074	-4.81442	1.47631e-06	0.00035833
ENSG00000169299	1505.47	-0.847122	0.166761	-5.07986	3.77718e-07	0.000172886
ENSG00000154305	2451.94	-0.840607	0.18865	-4.45592	8.35357e-06	0.00115572
ENSG00000101347	809.404	-0.836698	0.189112	-4.42435	9.67345e-06	0.00127459
ENSG00000123636	869.369	-0.833864	0.200113	-4.16697	3.08674e-05	0.00248614
ENSG00000113971	212.559	-0.830232	0.278151	-2.98482	0.00283744	0.0494345
ENSG00000131013	1626.04	-0.830198	0.164894	-5.03474	4.78493e-07	0.000184792
ENSG00000156261	8650.18	-0.829877	0.191542	-4.3326	1.47357e-05	0.0016152
ENSG00000150753	11635.9	-0.828427	0.195301	-4.2418	2.21733e-05	0.00204512
ENSG00000038219	2135.57	-0.828074	0.231555	-3.57614	0.000348701	0.0133267
ENSG00000102241	1220.73	-0.823823	0.216618	-3.80312	0.000142883	0.00726761
ENSG00000125676	2452.3	-0.821077	0.203449	-4.03578	5.44216e-05	0.00372831
ENSG00000135315	753.182	-0.818976	0.222134	-3.68686	0.000227037	0.00984656
ENSG00000114054	1495.62	-0.816947	0.198901	-4.1073	4.00307e-05	0.0029836
ENSG00000115839	2855.71	-0.811685	0.167945	-4.83305	1.34459e-06	0.000338226
ENSG00000168439	5621.87	-0.810504	0.231179	-3.50595	0.000454973	0.0156971
ENSG00000213976	240.591	-0.809516	0.273305	-2.96195	0.00305695	0.0514512
ENSG00000086712	1297.96	-0.807303	0.219508	-3.67779	0.000235261	0.0100149
ENSG00000116005	4326.08	-0.80645	0.243121	-3.31707	0.00090967	0.0254879
ENSG00000260852	604.332	-0.805795	0.296687	-2.71598	0.006608	0.0835709
ENSG00000065613	946.883	-0.8052	0.245144	-3.28459	0.0010213	0.027383
ENSG00000100220	3426.7	-0.803354	0.220812	-3.63818	0.000274574	0.0113395
ENSG00000197170	5535.7	-0.80111	0.201982	-3.96625	7.30131e-05	0.00457075
ENSG00000031698	2684.86	-0.80043	0.174879	-4.57704	4.716e-06	0.000815573
ENSG00000151348	707.809	-0.799411	0.204206	-3.91473	9.05056e-05	0.00528331
ENSG00000111961	508.326	-0.79754	0.172468	-4.62427	3.75928e-06	0.000705751
ENSG00000175265	436.481	-0.796162	0.243241	-3.27315	0.00106357	0.0281348
ENSG00000138385	6845.32	-0.795683	0.179535	-4.43191	9.34005e-06	0.0012425
ENSG00000119711	1545	-0.795451	0.176941	-4.49557	6.93844e-06	0.00104517
ENSG00000143149	1415.78	-0.792035	0.18242	-4.34183	1.413e-05	0.00158934
ENSG00000092853	1523.58	-0.790513	0.254401	-3.10735	0.00188771	0.0386339
ENSG00000165487	1263.21	-0.790276	0.205114	-3.85286	0.000116745	0.00614132
ENSG00000134240	704.829	-0.789949	0.295795	-2.6706	0.00757153	0.0914999
ENSG00000163507	3252.11	-0.789771	0.240201	-3.28796	0.00100917	0.0272161
ENSG00000073578	1521.54	-0.788703	0.201272	-3.91859	8.90691e-05	0.00522149
ENSG00000196177	5189.85	-0.785779	0.204848	-3.83592	0.000125097	0.0065299
ENSG00000120327	266.787	-0.785655	0.251216	-3.12741	0.00176355	0.0377106
ENSG00000164904	2738.74	-0.785386	0.188279	-4.17138	3.02756e-05	0.00247693
ENSG00000106263	10921.3	-0.785207	0.170416	-4.60759	4.07361e-06	0.000737528
ENSG00000100596	498.452	-0.783064	0.24391	-3.21046	0.00132521	0.0322786
ENSG00000176049	251.334	-0.781087	0.266958	-2.92588	0.00343478	0.0551919
ENSG00000187792	573.93	-0.780814	0.204416	-3.81973	0.000133596	0.00691181
ENSG00000259623	760.123	-0.779303	0.263738	-2.95484	0.00312833	0.0522081
ENSG00000146909	1668.33	-0.779189	0.26094	-2.98609	0.00282573	0.0494015
ENSG00000198836	2339.12	-0.776025	0.220701	-3.51619	0.000437792	0.0152951
ENSG00000011260	1868.81	-0.775465	0.187612	-4.13334	3.57532e-05	0.00277891
ENSG00000128833	632.383	-0.77483	0.205696	-3.76688	0.000165302	0.00791333
ENSG00000108883	2573.58	-0.774065	0.169817	-4.55823	5.1587e-06	0.00085964
ENSG00000089048	3334.72	-0.774054	0.228779	-3.38341	0.000715924	0.0216736
ENSG00000096872	251.149	-0.774017	0.230744	-3.35444	0.00079527	0.0232121
ENSG00000165092	25415.2	-0.773148	0.208936	-3.7004	0.000215259	0.00945017
ENSG00000113643	3093.47	-0.769302	0.21483	-3.58098	0.000342305	0.0131809
ENSG00000115761	1607.32	-0.767441	0.184186	-4.16667	3.09083e-05	0.00248614
ENSG00000133789	1093.25	-0.767271	0.257842	-2.97574	0.00292279	0.0501697
ENSG00000173473	7759.87	-0.767083	0.193583	-3.96256	7.41518e-05	0.00460309
ENSG00000078618	7471.49	-0.765018	0.177662	-4.30603	1.66212e-05	0.00171608
ENSG00000035928	3245.71	-0.764451	0.195436	-3.91152	9.17163e-05	0.00530919
ENSG00000128578	453.567	-0.764374	0.229981	-3.32364	0.000888504	0.0250355
ENSG00000130816	3184.24	-0.762125	0.225762	-3.37579	0.00073603	0.0219764
ENSG00000129680	318.562	-0.761771	0.201631	-3.77805	0.000158059	0.00767278
ENSG00000163811	5141.59	-0.760859	0.158614	-4.79693	1.61113e-06	0.00038431
ENSG00000138190	1187.91	-0.759364	0.178735	-4.24856	2.15152e-05	0.00202492
ENSG00000124228	2523.33	-0.758122	0.196435	-3.85941	0.000113663	0.00607156
ENSG00000060339	4122.81	-0.75707	0.200577	-3.77446	0.000160354	0.00775698
ENSG00000131747	9666.28	-0.756573	0.241638	-3.13102	0.001742	0.0375935
ENSG00000108559	2297.39	-0.756435	0.211596	-3.5749	0.000350364	0.0133534
ENSG00000115866	2376.33	-0.755097	0.14381	-5.25066	1.51556e-07	0.000106498
ENSG00000070814	2306.49	-0.753661	0.170557	-4.41881	9.92439e-06	0.00128209
ENSG00000120549	1178.11	-0.75262	0.204433	-3.6815	0.00023187	0.00992935
ENSG00000027697	1196.92	-0.752548	0.192379	-3.91181	9.16085e-05	0.00530919
ENSG00000148019	4040.26	-0.751434	0.219293	-3.42663	0.000611128	0.0194591
ENSG00000163590	890.939	-0.750427	0.258158	-2.90685	0.00365086	0.0572672
ENSG00000115816	2549	-0.749884	0.178302	-4.20569	2.60286e-05	0.00223668
ENSG00000122692	1762.93	-0.74976	0.164411	-4.56028	5.10847e-06	0.00085964
ENSG00000144635	6433.17	-0.74967	0.179769	-4.17018	3.04358e-05	0.00247693
ENSG00000137992	2166.62	-0.749537	0.155478	-4.82085	1.42945e-06	0.000353152
ENSG00000154310	804.637	-0.749281	0.221962	-3.37571	0.000736257	0.0219764
ENSG00000116580	2223.18	-0.749267	0.199748	-3.75105	0.000176095	0.00828663
ENSG00000196419	13790.2	-0.748347	0.188861	-3.96242	7.41951e-05	0.00460309
ENSG00000158417	3774.86	-0.74416	0.251052	-2.96417	0.00303505	0.0513005
ENSG00000178105	1063.98	-0.743354	0.229757	-3.23539	0.00121478	0.0306128
ENSG00000166130	1761.44	-0.742998	0.24679	-3.01065	0.00260689	0.0469004
ENSG00000132792	1559.32	-0.740953	0.183279	-4.04276	5.28257e-05	0.00365422
ENSG00000005175	1981.24	-0.740466	0.18784	-3.94201	8.0801e-05	0.00492459
ENSG00000132780	8115.41	-0.739951	0.181011	-4.08787	4.35353e-05	0.00320378
ENSG00000170759	7144.99	-0.738539	0.217695	-3.39253	0.000692499	0.0211963
ENSG00000171634	2463.22	-0.737929	0.232038	-3.18021	0.0014717	0.0340168
ENSG00000182827	2351.17	-0.736757	0.166699	-4.41969	9.88414e-06	0.00128209
ENSG00000075856	3537.79	-0.73666	0.175858	-4.18896	2.80239e-05	0.00234976
ENSG00000185418	718.766	-0.736139	0.214836	-3.42651	0.000611383	0.0194591
ENSG00000140259	1018.25	-0.734858	0.198551	-3.70111	0.000214662	0.00945017
ENSG00000165733	2016.29	-0.734806	0.184491	-3.98289	6.80817e-05	0.0043406
ENSG00000111605	5046.62	-0.733145	0.136731	-5.36196	8.23243e-08	7.59304e-05
ENSG00000151461	1837.31	-0.732994	0.21917	-3.34442	0.000824559	0.0237662
ENSG00000117877	2093.95	-0.730106	0.147662	-4.94445	7.636e-07	0.000246841
ENSG00000165934	3503.51	-0.72963	0.178724	-4.08244	4.45649e-05	0.0032622
ENSG00000115808	517.678	-0.727887	0.216524	-3.36169	0.000774668	0.0227066
ENSG00000184863	2764.2	-0.727242	0.227707	-3.19376	0.00140433	0.0335051
ENSG00000002549	2718.27	-0.726725	0.204485	-3.55393	0.000379516	0.0139611
ENSG00000067066	315.436	-0.726494	0.262348	-2.76921	0.00561932	0.0757065
ENSG00000044459	1304.23	-0.725262	0.187365	-3.87085	0.000108455	0.00586123
ENSG00000185963	1623.64	-0.724339	0.248297	-2.91722	0.00353165	0.0561302
ENSG00000092108	15536.5	-0.723775	0.178935	-4.0449	5.23454e-05	0.00363919
ENSG00000196504	6527.27	-0.721436	0.161812	-4.45849	8.25393e-06	0.00115347
ENSG00000065243	2192.64	-0.721199	0.182952	-3.94202	8.07979e-05	0.00492459
ENSG00000187257	835.241	-0.719367	0.204339	-3.52046	0.000430799	0.0151272
ENSG00000146842	1691.5	-0.717316	0.1425	-5.0338	4.80847e-07	0.000184792
ENSG00000155903	807.466	-0.716269	0.163249	-4.38759	1.14615e-05	0.00137049
ENSG00000067704	4917.91	-0.716064	0.234406	-3.0548	0.00225213	0.0429176
ENSG00000164597	1426.32	-0.715746	0.167015	-4.28551	1.82323e-05	0.00182785
ENSG00000121749	2036.5	-0.715266	0.185034	-3.86559	0.000110819	0.00594258
ENSG00000165632	1108.94	-0.715261	0.182211	-3.92545	8.65665e-05	0.00511815
ENSG00000120915	1514.9	-0.715171	0.19151	-3.73438	0.000188179	0.00870721
ENSG00000076003	3825.79	-0.71489	0.16919	-4.22537	2.38547e-05	0.00215706
ENSG00000129292	1508.78	-0.714388	0.177677	-4.02071	5.80228e-05	0.003878
ENSG00000117528	6113.31	-0.714117	0.201675	-3.54092	0.000398732	0.0143984
ENSG00000143970	1243.94	-0.713271	0.198134	-3.59994	0.000318294	0.0125458
ENSG00000187372	209.822	-0.713	0.234091	-3.04582	0.00232046	0.0438096
ENSG00000136143	1068.61	-0.712124	0.21088	-3.37692	0.000733027	0.0219764
ENSG00000155640	212.797	-0.711745	0.261275	-2.72412	0.00644725	0.0822982
ENSG00000085721	1659.74	-0.711626	0.164301	-4.33124	1.48269e-05	0.0016152
ENSG00000156709	2417.16	-0.71069	0.214261	-3.31694	0.000910085	0.0254879
ENSG00000144357	2383.45	-0.709577	0.203218	-3.4917	0.000479965	0.0163153
ENSG00000150760	1290.66	-0.709429	0.152289	-4.65844	3.18611e-06	0.000651007
ENSG00000054267	1855.65	-0.708898	0.197351	-3.59206	0.000328072	0.0128945
ENSG00000164151	2060.91	-0.708682	0.182007	-3.89371	9.87216e-05	0.00559848
ENSG00000103047	574.631	-0.708422	0.200705	-3.52966	0.000416088	0.0149134
ENSG00000134371	1214.44	-0.707584	0.200807	-3.5237	0.000425567	0.0151272
ENSG00000142657	17620.6	-0.70457	0.152093	-4.6325	3.61268e-06	0.000694186
ENSG00000058729	1110.07	-0.7034	0.197032	-3.56998	0.000357009	0.0134908
ENSG00000092201	4286.34	-0.703397	0.198516	-3.54327	0.000395195	0.0143129
ENSG00000153113	3214.78	-0.702936	0.185779	-3.78372	0.0001545	0.0076277
ENSG00000153914	3220.91	-0.701259	0.226163	-3.10068	0.00193076	0.0391673
ENSG00000171316	2231.32	-0.701151	0.22205	-3.15762	0.0015906	0.0354272
ENSG00000096717	1239.42	-0.700524	0.167484	-4.18264	2.88141e-05	0.00237287
ENSG00000136824	1857.6	-0.699602	0.157513	-4.44156	8.93082e-06	0.00119959
ENSG00000083720	556.458	-0.698989	0.208443	-3.35338	0.000798298	0.0232515
ENSG00000133103	1144.35	-0.698303	0.171799	-4.06466	4.8103e-05	0.00341284
ENSG00000135677	6008.54	-0.698014	0.253144	-2.75738	0.00582669	0.0774373
ENSG00000036257	3968.41	-0.696658	0.175395	-3.97194	7.12883e-05	0.00450353
ENSG00000129691	2958.58	-0.696624	0.182792	-3.81101	0.000138399	0.00709165
ENSG00000145375	371.231	-0.695631	0.253918	-2.7396	0.00615149	0.0802226
ENSG00000175467	1024.12	-0.694074	0.240483	-2.88616	0.00389972	0.0594959
ENSG00000106066	2276.99	-0.692678	0.162332	-4.26704	1.98086e-05	0.00192995
ENSG00000116266	1082.45	-0.69099	0.162201	-4.2601	2.04337e-05	0.0019632
ENSG00000151657	1242.4	-0.690424	0.190724	-3.62002	0.000294583	0.0118821
ENSG00000206530	1259.89	-0.689303	0.246145	-2.80039	0.00510403	0.0707557
ENSG00000011405	2986.72	-0.689046	0.184045	-3.7439	0.000181184	0.00843999
ENSG00000047410	2816.87	-0.68726	0.227524	-3.02061	0.0025227	0.0458121
ENSG00000087263	2175.51	-0.685704	0.201995	-3.39465	0.000687164	0.0210796
ENSG00000055332	489.366	-0.685546	0.239565	-2.86162	0.00421477	0.0624194
ENSG00000166226	10814.6	-0.68521	0.199994	-3.42615	0.000612203	0.0194591
ENSG00000130935	3719.33	-0.684696	0.181464	-3.77317	0.000161186	0.00777006
ENSG00000124198	3756.5	-0.684532	0.184376	-3.71269	0.000205066	0.00918149
ENSG00000172340	1114.86	-0.684392	0.219219	-3.12195	0.00179655	0.0380631
ENSG00000138029	3266.35	-0.683779	0.202991	-3.36852	0.000755733	0.0224368
ENSG00000168172	1899.32	-0.683735	0.234128	-2.92035	0.00349635	0.0558568
ENSG00000150593	918.804	-0.683525	0.246991	-2.76741	0.00565041	0.0760442
ENSG00000125633	2077.33	-0.682846	0.229634	-2.97362	0.00294306	0.0503198
ENSG00000111647	5888.86	-0.681736	0.175279	-3.88944	0.000100477	0.00565079
ENSG00000029363	4955.81	-0.680059	0.199896	-3.40206	0.000668803	0.020793
ENSG00000122484	1103.9	-0.678104	0.21173	-3.20268	0.00136154	0.0328742
ENSG00000137831	1417.56	-0.677639	0.228625	-2.96398	0.00303687	0.0513005
ENSG00000169679	3277.84	-0.677081	0.224695	-3.01334	0.00258389	0.0467296
ENSG00000076382	8474.95	-0.677052	0.185539	-3.6491	0.000263158	0.0110266
ENSG00000100603	2308.77	-0.676782	0.190466	-3.5533	0.000380437	0.0139611
ENSG00000113163	1257.23	-0.676339	0.183224	-3.69132	0.00022309	0.00970583
ENSG00000067225	20203.9	-0.675448	0.15631	-4.3212	1.55182e-05	0.00165204
ENSG00000048028	1255.7	-0.675426	0.165871	-4.07201	4.66101e-05	0.0033412
ENSG00000116127	1274.51	-0.675243	0.19622	-3.44126	0.000579015	0.0187192
ENSG00000156096	1883.96	-0.674506	0.16122	-4.18377	2.8671e-05	0.00237287
ENSG00000135090	1058.65	-0.673771	0.171563	-3.92726	8.592e-05	0.00510173
ENSG00000151176	3462.73	-0.672791	0.233501	-2.88132	0.00396017	0.0600098
ENSG00000131016	348.279	-0.67128	0.250647	-2.67819	0.00740218	0.0900696
ENSG00000188976	2695.19	-0.669052	0.169887	-3.93821	8.20907e-05	0.00498125
ENSG00000100991	3894.7	-0.668975	0.14368	-4.65601	3.22401e-06	0.000651007
ENSG00000138246	4321.05	-0.66842	0.193399	-3.45617	0.000547909	0.0180484
ENSG00000131236	9929.96	-0.667998	0.201378	-3.31714	0.000909444	0.0254879
ENSG00000197969	3911.43	-0.667071	0.210556	-3.16814	0.00153419	0.034853
ENSG00000127914	1646.73	-0.666271	0.221533	-3.00754	0.0026337	0.0471755
ENSG00000197746	16635.5	-0.663983	0.249826	-2.65779	0.00786554	0.0930879
ENSG00000164163	4152.07	-0.663011	0.201797	-3.28553	0.00101791	0.0273622
ENSG00000134313	1266.54	-0.662534	0.171051	-3.87332	0.000107362	0.00584782
ENSG00000117523	4677.34	-0.662413	0.249233	-2.65781	0.00786512	0.0930879
ENSG00000183431	5374.03	-0.660443	0.194273	-3.39957	0.000674923	0.0208433
ENSG00000168297	179.413	-0.657378	0.246719	-2.66448	0.00771084	0.0926037
ENSG00000120800	2488.66	-0.656879	0.21226	-3.09468	0.00197022	0.0397347
ENSG00000084463	6625.38	-0.656859	0.151512	-4.33536	1.45519e-05	0.0016152
ENSG00000121210	780.566	-0.656709	0.176225	-3.72654	0.000194124	0.00892262
ENSG00000126653	3630.42	-0.656658	0.195118	-3.36544	0.000764217	0.0226401
ENSG00000163714	4829.39	-0.656163	0.223087	-2.94129	0.00326852	0.0537693
ENSG00000118007	2049.25	-0.654912	0.216239	-3.02864	0.00245654	0.0450746
ENSG00000111058	2882.52	-0.653848	0.205169	-3.18687	0.0014382	0.033773
ENSG00000152409	404.87	-0.653043	0.215259	-3.03375	0.00241535	0.0446701
ENSG00000126261	10652.4	-0.652096	0.180037	-3.622	0.00029233	0.0118284
ENSG00000074695	6482.46	-0.651953	0.195811	-3.3295	0.000870034	0.0246658
ENSG00000127527	1304.13	-0.651737	0.190628	-3.41888	0.000628785	0.019816
ENSG00000118412	2018.2	-0.65131	0.23968	-2.71741	0.00657951	0.0835114
ENSG00000080839	1126.39	-0.650799	0.219667	-2.96266	0.00304996	0.0513962
ENSG00000139842	2775.09	-0.650607	0.17198	-3.78304	0.000154925	0.0076277
ENSG00000153132	1138.43	-0.650297	0.217619	-2.98824	0.00280587	0.0492005
ENSG00000113522	1053.72	-0.64948	0.218388	-2.97397	0.00293974	0.0503198
ENSG00000115750	986.535	-0.649372	0.191747	-3.38661	0.000707614	0.021475
ENSG00000104549	6780.09	-0.648791	0.164992	-3.93226	8.41492e-05	0.00506176
ENSG00000134243	2278.22	-0.648533	0.22584	-2.87164	0.00408344	0.0612074
ENSG00000074356	1976.39	-0.648145	0.182369	-3.55402	0.000379383	0.0139611
ENSG00000132383	2114.05	-0.647524	0.225562	-2.87071	0.00409547	0.061255
ENSG00000100393	2401.83	-0.647315	0.222972	-2.90312	0.00369469	0.0578235
ENSG00000147257	18300.1	-0.646936	0.191397	-3.38008	0.000724641	0.0218895
ENSG00000111667	2436.94	-0.646695	0.15901	-4.067	4.76224e-05	0.00339616
ENSG00000198399	731.914	-0.645239	0.212362	-3.0384	0.00237842	0.0444668
ENSG00000104375	616.318	-0.645052	0.186252	-3.46333	0.000533539	0.0176591
ENSG00000113141	1378.52	-0.644637	0.19834	-3.25017	0.00115337	0.0296597
ENSG00000134014	1810.56	-0.643923	0.165248	-3.89671	9.75067e-05	0.0055744
ENSG00000111142	7674.77	-0.642979	0.197182	-3.26084	0.00111083	0.0288337
ENSG00000184500	6498.47	-0.641282	0.190643	-3.36378	0.00076883	0.0226432
ENSG00000133739	859.094	-0.641247	0.23485	-2.73046	0.00632465	0.0814027
ENSG00000140284	341.239	-0.641134	0.206072	-3.11121	0.00186323	0.0384976
ENSG00000168438	1301.35	-0.640942	0.18065	-3.54797	0.000388207	0.0141711
ENSG00000143278	260.326	-0.639885	0.221975	-2.88269	0.00394295	0.0598144
ENSG00000178104	1549.7	-0.639746	0.216323	-2.95737	0.00310278	0.0520911
ENSG00000204130	413.631	-0.636917	0.219243	-2.90507	0.0036717	0.0575288
ENSG00000117597	1011.83	-0.63639	0.188537	-3.37541	0.000737046	0.0219764
ENSG00000163681	1720.74	-0.63594	0.156646	-4.05971	4.9133e-05	0.00346814
ENSG00000065183	2023.55	-0.635437	0.196653	-3.23125	0.00123249	0.0309464
ENSG00000084234	8962.76	-0.634698	0.21923	-2.89512	0.00379011	0.0585879
ENSG00000079134	2457.69	-0.634512	0.128178	-4.95023	7.41274e-07	0.000246841
ENSG00000134716	644.771	-0.631932	0.169676	-3.72435	0.000195817	0.00894119
ENSG00000040275	4496.64	-0.631021	0.197227	-3.19947	0.00137681	0.0330698
ENSG00000163655	1910.51	-0.630097	0.220372	-2.85924	0.00424657	0.0627685
ENSG00000162600	560.831	-0.629657	0.218248	-2.88506	0.00391342	0.0594969
ENSG00000115504	4534.13	-0.628683	0.1456	-4.31788	1.57536e-05	0.00166374
ENSG00000166598	24478.6	-0.627942	0.221214	-2.83862	0.00453095	0.0658463
ENSG00000128512	1397.2	-0.626876	0.203466	-3.08099	0.00206313	0.0406601
ENSG00000140829	1923.39	-0.625528	0.23791	-2.62926	0.00855706	0.0991516
ENSG00000146731	22445.4	-0.625451	0.199396	-3.13672	0.00170846	0.037048
ENSG00000077235	1263.33	-0.624962	0.195195	-3.20172	0.00136608	0.0329264
ENSG00000083635	869.805	-0.624031	0.176997	-3.52566	0.000422435	0.0150629
ENSG00000121350	527.046	-0.623967	0.200491	-3.1122	0.00185698	0.0384922
ENSG00000115355	3113.41	-0.623873	0.158848	-3.92748	8.58402e-05	0.00510173
ENSG00000151422	356.484	-0.623609	0.217108	-2.87234	0.00407439	0.061138
ENSG00000138801	1461.68	-0.622487	0.192091	-3.24059	0.00119285	0.030115
ENSG00000148498	2988.35	-0.622228	0.226639	-2.74546	0.00604255	0.0794664
ENSG00000144036	1172.09	-0.621517	0.234714	-2.64798	0.00809745	0.0954244
ENSG00000119787	4090.99	-0.621468	0.137467	-4.52084	6.1594e-06	0.000961678
ENSG00000008294	2444.72	-0.620266	0.194527	-3.18858	0.00142971	0.0336396
ENSG00000133028	2742.47	-0.619308	0.222094	-2.7885	0.00529527	0.0726967
ENSG00000061936	1281.3	-0.617627	0.150362	-4.1076	3.99788e-05	0.0029836
ENSG00000073969	1399.51	-0.61744	0.20358	-3.03291	0.00242206	0.0446701
ENSG00000025796	6660.11	-0.616602	0.159146	-3.87445	0.000106867	0.00584782
ENSG00000154727	585.116	-0.615647	0.209677	-2.93617	0.00332292	0.054213
ENSG00000133138	632.623	-0.6155	0.185836	-3.31207	0.000926091	0.0257278
ENSG00000138363	7110.54	-0.615013	0.197517	-3.11372	0.00184745	0.0384903
ENSG00000147251	245.675	-0.614739	0.210149	-2.92525	0.00344179	0.0552403
ENSG00000122545	7900.04	-0.61444	0.186763	-3.28995	0.00100206	0.0271833
ENSG00000174243	5818.75	-0.613797	0.191836	-3.19959	0.00137623	0.0330698
ENSG00000155660	7014.91	-0.612284	0.229272	-2.67055	0.00757263	0.0914999
ENSG00000211456	3438.56	-0.612133	0.162877	-3.75825	0.000171107	0.00810709
ENSG00000135249	1700.01	-0.611405	0.204674	-2.98721	0.00281535	0.0493043
ENSG00000143228	1295.61	-0.611264	0.157907	-3.87103	0.000108377	0.00586123
ENSG00000163006	1380.85	-0.611132	0.193285	-3.16182	0.00156788	0.0352487
ENSG00000068394	1578.59	-0.610494	0.132858	-4.5951	4.32548e-06	0.000757506
ENSG00000182985	1707.36	-0.610393	0.189927	-3.21383	0.00130978	0.0320723
ENSG00000112739	2468.5	-0.609029	0.21437	-2.84102	0.0044969	0.0655581
ENSG00000111897	3505.62	-0.608949	0.19715	-3.08876	0.00200996	0.0401266
ENSG00000102221	863.797	-0.608711	0.215016	-2.831	0.00464026	0.0666309
ENSG00000113296	3467.51	-0.608455	0.220947	-2.75384	0.00588997	0.0781283
ENSG00000083642	1717.33	-0.608433	0.186041	-3.27043	0.00107385	0.0282812
ENSG00000137713	2867.75	-0.608315	0.202248	-3.00776	0.00263177	0.0471755
ENSG00000113649	3667.37	-0.607726	0.196645	-3.09047	0.00199837	0.0400108
ENSG00000065833	4431.67	-0.607016	0.203063	-2.98929	0.00279627	0.0491136
ENSG00000135521	2270.52	-0.606949	0.157521	-3.85313	0.000116619	0.00614132
ENSG00000143870	10685.1	-0.606478	0.221455	-2.7386	0.00617008	0.0803039
ENSG00000086200	1253.32	-0.606378	0.179616	-3.37597	0.000735569	0.0219764
ENSG00000135317	1494.42	-0.606342	0.200938	-3.01755	0.00254826	0.0461455
ENSG00000164609	2472.76	-0.605514	0.152092	-3.98122	6.85619e-05	0.00435116
ENSG00000087008	354.067	-0.605444	0.220748	-2.7427	0.00609367	0.0799108
ENSG00000139719	800.526	-0.605255	0.211888	-2.85649	0.00428359	0.0632481
ENSG00000047315	4043.83	-0.60462	0.175496	-3.44521	0.000570626	0.0185706
ENSG00000100504	4433.85	-0.603706	0.172271	-3.5044	0.000457646	0.0157479
ENSG00000196214	1331.44	-0.603036	0.178069	-3.38653	0.000707815	0.021475
ENSG00000143799	4120.76	-0.602902	0.220601	-2.733	0.00627611	0.0812254
ENSG00000164944	2125.33	-0.602736	0.179866	-3.35103	0.000805102	0.0233513
ENSG00000107854	2500.19	-0.602116	0.19855	-3.03257	0.00242481	0.0446701
ENSG00000103550	1619.31	-0.601462	0.187582	-3.20639	0.00134412	0.0325673
ENSG00000105835	1705.3	-0.601429	0.158678	-3.79025	0.000150498	0.00754397
ENSG00000131844	4028.26	-0.601173	0.168558	-3.56657	0.000361689	0.0135609
ENSG00000126602	2073.44	-0.60003	0.158137	-3.79437	0.000148017	0.00744659
ENSG00000104517	1887.27	-0.599703	0.193181	-3.10436	0.00190694	0.0389123
ENSG00000204574	2410.96	-0.59955	0.191683	-3.12782	0.00176111	0.0377106
ENSG00000121060	1405.88	-0.599323	0.189677	-3.15971	0.00157927	0.0353547
ENSG00000041802	2225.78	-0.598912	0.205472	-2.91481	0.00355905	0.056338
ENSG00000112118	5662.98	-0.598735	0.165791	-3.61138	0.000304574	0.0121435
ENSG00000167107	1834.01	-0.59836	0.164038	-3.64769	0.000264607	0.0110266
ENSG00000280079	782.385	-0.5979	0.195029	-3.06569	0.00217168	0.0421025
ENSG00000124383	7637.49	-0.597859	0.160837	-3.71717	0.000201469	0.00910889
ENSG00000090339	2995.59	-0.597585	0.182991	-3.26566	0.0010921	0.0285582
ENSG00000110318	346.6	-0.59734	0.195241	-3.0595	0.00221707	0.0427204
ENSG00000087274	5136.89	-0.597304	0.146557	-4.07557	4.59025e-05	0.00330761
ENSG00000242247	1296.37	-0.596867	0.21044	-2.83628	0.00456425	0.0661218
ENSG00000105948	245.999	-0.596669	0.212387	-2.80935	0.00496424	0.069558
ENSG00000162664	3226.94	-0.596626	0.175477	-3.40003	0.000673783	0.0208433
ENSG00000119599	312.627	-0.595848	0.211507	-2.81715	0.00484512	0.0685775
ENSG00000130396	5081.41	-0.595729	0.203434	-2.92837	0.00340749	0.0550731
ENSG00000174953	1955.36	-0.595514	0.172239	-3.45748	0.000545259	0.0180039
ENSG00000143643	1152.75	-0.595232	0.174753	-3.40613	0.000658917	0.0205781
ENSG00000183421	466.338	-0.595072	0.184507	-3.2252	0.00125886	0.0313242
ENSG00000080608	1396.07	-0.594706	0.199427	-2.98208	0.002863	0.0496345
ENSG00000159086	2029.99	-0.59468	0.195538	-3.04125	0.002356	0.0441858
ENSG00000174780	5277.15	-0.594398	0.19312	-3.07788	0.00208482	0.0409127
ENSG00000173276	828.787	-0.594271	0.161975	-3.66891	0.000243589	0.0102746
ENSG00000172296	4438.49	-0.593608	0.209412	-2.83464	0.00458778	0.0662546
ENSG00000176393	2634.52	-0.59323	0.191123	-3.10392	0.00190978	0.0389128
ENSG00000163166	3130.03	-0.592507	0.14424	-4.1078	3.99451e-05	0.0029836
ENSG00000189221	723.999	-0.592247	0.197744	-2.99502	0.00274428	0.0484893
ENSG00000069345	1646.23	-0.590981	0.182338	-3.24112	0.0011906	0.030115
ENSG00000100029	2621.73	-0.59023	0.166267	-3.54989	0.000385391	0.0141055
ENSG00000080986	2115.32	-0.589938	0.19202	-3.07227	0.00212438	0.0415125
ENSG00000052841	2726.28	-0.587848	0.133841	-4.39212	1.12251e-05	0.00137049
ENSG00000143493	3579.62	-0.58723	0.207441	-2.83083	0.00464273	0.0666309
ENSG00000164934	2229.22	-0.587228	0.20735	-2.83207	0.00462482	0.0665852
ENSG00000163510	1686.92	-0.58709	0.187955	-3.12358	0.00178668	0.0379372
ENSG00000053900	2398.62	-0.586523	0.193368	-3.03319	0.0024198	0.0446701
ENSG00000172888	4115.08	-0.586127	0.213237	-2.74871	0.00598298	0.0789833
ENSG00000154767	2784.11	-0.585806	0.158171	-3.70362	0.00021254	0.00942467
ENSG00000013810	4646.54	-0.585069	0.150533	-3.88666	0.000101633	0.0056672
ENSG00000165525	1581.91	-0.58501	0.198843	-2.94207	0.00326027	0.0537693
ENSG00000196152	685.649	0.58949	0.212659	2.772	0.00557133	0.0752728
ENSG00000134285	5650.28	0.590739	0.219578	2.69034	0.00713788	0.0879364
ENSG00000173914	5688.11	0.590996	0.187771	3.14743	0.00164715	0.0362101
ENSG00000204356	2767.01	0.59112	0.18148	3.25723	0.00112507	0.0290397
ENSG00000126062	1475.88	0.591452	0.19356	3.05565	0.0022457	0.0428541
ENSG00000168517	292.326	0.592433	0.2199	2.6941	0.00705791	0.0873592
ENSG00000240342	14921.4	0.592763	0.188645	3.14222	0.00167675	0.0366671
ENSG00000168237	8589.5	0.592949	0.187693	3.15914	0.00158234	0.0353662
ENSG00000107833	3523.52	0.594487	0.209152	2.84236	0.00447805	0.0654212
ENSG00000141349	1467.03	0.594857	0.191146	3.11206	0.00185788	0.0384922
ENSG00000135451	6387.31	0.597201	0.162201	3.68185	0.000231548	0.00992935
ENSG00000204435	1241.42	0.597757	0.181045	3.30171	0.000960962	0.0263265
ENSG00000108298	90326.6	0.597797	0.185716	3.21888	0.00128694	0.0317052
ENSG00000149273	106183	0.601544	0.182795	3.29082	0.000998963	0.0271526
ENSG00000178188	1364.72	0.602348	0.220567	2.7309	0.00631607	0.0814027
ENSG00000283103	1198.02	0.602478	0.206538	2.91704	0.00353375	0.0561302
ENSG00000012061	2329.5	0.602732	0.203729	2.9585	0.00309138	0.0519676
ENSG00000070761	1369.78	0.605066	0.177787	3.40331	0.000665738	0.0207444
ENSG00000130244	324.147	0.605661	0.221062	2.73977	0.00614815	0.0802226
ENSG00000145439	1402.42	0.606196	0.174906	3.46583	0.00052859	0.0175606
ENSG00000226415	342.888	0.608042	0.231131	2.63072	0.00852033	0.0988915
ENSG00000144115	700.737	0.608124	0.196947	3.08775	0.00201679	0.0402051
ENSG00000168765	632.561	0.608641	0.204397	2.97773	0.0029039	0.0499073
ENSG00000123395	1977	0.608776	0.191757	3.17473	0.00149975	0.0345781
ENSG00000128973	4925.59	0.610426	0.156214	3.90763	9.32076e-05	0.00537303
ENSG00000117308	2467.76	0.612343	0.171523	3.57003	0.000356937	0.0134908
ENSG00000204628	90637.4	0.615514	0.177613	3.46548	0.000529293	0.0175606
ENSG00000148331	1429.35	0.617218	0.173646	3.55446	0.000378749	0.0139611
ENSG00000164970	1322.23	0.618819	0.216086	2.86376	0.00418641	0.0622116
ENSG00000102882	1996.15	0.619112	0.172735	3.58418	0.000338143	0.0131042
ENSG00000172375	492.704	0.619142	0.170923	3.62234	0.000291949	0.0118284
ENSG00000224081	425.16	0.619396	0.226621	2.73318	0.00627259	0.0812254
ENSG00000137309	15282.1	0.619431	0.144186	4.29604	1.73873e-05	0.00176878
ENSG00000144035	1322.96	0.620183	0.228863	2.70984	0.00673158	0.0846649
ENSG00000005249	409.823	0.62361	0.224679	2.77556	0.00551072	0.0745996
ENSG00000174851	18079.8	0.62364	0.232432	2.68311	0.00729406	0.0893039
ENSG00000040487	958.89	0.624055	0.225857	2.76306	0.00572628	0.0763494
ENSG00000143947	119123	0.624732	0.23068	2.70822	0.00676443	0.0849507
ENSG00000158604	6188.83	0.625587	0.178705	3.50068	0.000464081	0.0158925
ENSG00000197756	145003	0.626775	0.233679	2.68221	0.00731385	0.0894669
ENSG00000163032	4633.59	0.627403	0.187686	3.34283	0.000829299	0.0238036
ENSG00000143303	863.947	0.628097	0.237702	2.64237	0.00823281	0.0967723
ENSG00000167523	951.036	0.628255	0.179997	3.49035	0.00048238	0.0163572
ENSG00000155366	3082.12	0.628256	0.237796	2.64199	0.00824205	0.0967986
ENSG00000106400	7090.71	0.62842	0.208049	3.02054	0.00252322	0.0458121
ENSG00000168005	1802.53	0.62954	0.213866	2.94362	0.00324401	0.0536212
ENSG00000174669	16076.9	0.633244	0.233577	2.71107	0.00670665	0.0844513
ENSG00000142188	1005.58	0.633364	0.18589	3.40719	0.000656344	0.0205441
ENSG00000161558	698.674	0.633497	0.205437	3.08366	0.00204472	0.0404124
ENSG00000162384	2008.87	0.635256	0.207225	3.06553	0.00217284	0.0421025
ENSG00000104522	1660.12	0.635406	0.19865	3.19863	0.00138084	0.033109
ENSG00000182208	620.17	0.635494	0.228604	2.77988	0.00543782	0.0741205
ENSG00000213553	3028.03	0.63558	0.178061	3.56946	0.000357724	0.0134908
ENSG00000156873	1264.84	0.636277	0.191426	3.32387	0.000887765	0.0250355
ENSG00000068745	6960.02	0.638361	0.210409	3.0339	0.00241413	0.0446701
ENSG00000159596	2894.61	0.638464	0.200399	3.18597	0.00144271	0.033773
ENSG00000066379	771.739	0.639517	0.23466	2.72529	0.00642452	0.0822982
ENSG00000139546	2843.15	0.641265	0.202392	3.16843	0.00153263	0.034853
ENSG00000198755	52692.8	0.642263	0.194826	3.29659	0.000978646	0.0267053
ENSG00000114395	510.386	0.642677	0.212638	3.02239	0.00250783	0.0456525
ENSG00000176476	402.914	0.644686	0.230087	2.80192	0.00507992	0.0705022
ENSG00000196998	1620.01	0.644916	0.165968	3.88579	0.000101997	0.0056672
ENSG00000132254	3844.24	0.645554	0.152607	4.23016	2.33522e-05	0.00213639
ENSG00000110583	2382.9	0.645695	0.242475	2.66293	0.00774627	0.0928082
ENSG00000166548	739.935	0.645794	0.242864	2.65908	0.00783555	0.0929061
ENSG00000037965	211.961	0.650492	0.217616	2.98917	0.00279736	0.0491136
ENSG00000232346	315.411	0.651213	0.243248	2.67716	0.00742496	0.0902674
ENSG00000184207	2960.35	0.652167	0.204899	3.18286	0.00145826	0.0338625
ENSG00000108774	2108.52	0.653545	0.163761	3.99085	6.58373e-05	0.00423655
ENSG00000152977	963.851	0.653941	0.223427	2.92686	0.00342398	0.0551332
ENSG00000161016	65907.2	0.654758	0.217468	3.01082	0.00260546	0.0469004
ENSG00000148297	3348.04	0.655774	0.203963	3.21515	0.00130375	0.0319811
ENSG00000123329	398.797	0.656667	0.222071	2.95702	0.00310627	0.0520911
ENSG00000071082	101246	0.657099	0.204153	3.21866	0.00128792	0.0317052
ENSG00000149923	4633.58	0.657278	0.181471	3.62195	0.000292396	0.0118284
ENSG00000118181	42691.2	0.657577	0.225042	2.92201	0.00347776	0.0556584
ENSG00000108465	923.992	0.658008	0.200861	3.27593	0.00105313	0.027912
ENSG00000162191	2560.68	0.659375	0.176734	3.73088	0.000190813	0.00879966
ENSG00000204564	303.617	0.666022	0.223615	2.97844	0.00289724	0.0498718
ENSG00000196810	2340.53	0.666378	0.186732	3.56864	0.000358844	0.0134908
ENSG00000164442	3600.5	0.668707	0.247108	2.70614	0.00680712	0.0853486
ENSG00000004059	2789.8	0.669236	0.215053	3.11195	0.00185853	0.0384922
ENSG00000166965	1075.66	0.669337	0.166085	4.03009	5.57558e-05	0.00378989
ENSG00000229119	280.542	0.671003	0.232338	2.88805	0.00387644	0.0593259
ENSG00000137100	1161.7	0.67247	0.188594	3.5657	0.000362883	0.0135689
ENSG00000114779	1689.02	0.674089	0.210043	3.20928	0.00133067	0.032315
ENSG00000103187	411.154	0.675338	0.211377	3.19495	0.00139855	0.0334757
ENSG00000133874	203.633	0.676584	0.243921	2.77378	0.00554093	0.0749352
ENSG00000170889	46184	0.677741	0.232843	2.91073	0.0036059	0.0568844
ENSG00000197982	1139.57	0.678994	0.184368	3.68282	0.000230665	0.00992935
ENSG00000157326	585.747	0.679833	0.197757	3.43772	0.00058664	0.0189188
ENSG00000166169	1118.92	0.679957	0.189557	3.58709	0.000334394	0.0130687
ENSG00000105518	2073.9	0.680364	0.227968	2.98448	0.00284065	0.0494345
ENSG00000143811	2047.17	0.682972	0.235997	2.89399	0.00380378	0.0586681
ENSG00000142937	158152	0.686708	0.151616	4.52926	5.91896e-06	0.000952196
ENSG00000142541	185707	0.687465	0.218092	3.15217	0.0016206	0.03588
ENSG00000123374	4086.78	0.68785	0.228447	3.01099	0.00260398	0.0469004
ENSG00000176444	1957.46	0.691364	0.185679	3.72343	0.000196537	0.00894119
ENSG00000003137	1459.13	0.693805	0.197724	3.50896	0.000449864	0.0155597
ENSG00000013392	446.593	0.693813	0.208194	3.33253	0.000860609	0.0244487
ENSG00000144559	932.169	0.693843	0.208154	3.33331	0.000858193	0.0244487
ENSG00000115073	2845.48	0.695104	0.191808	3.62397	0.000290121	0.0118284
ENSG00000182899	38468.3	0.695379	0.220937	3.1474	0.00164729	0.0362101
ENSG00000131116	928.643	0.697249	0.223776	3.11584	0.00183422	0.0383329
ENSG00000160753	2258.29	0.698271	0.179784	3.88395	0.000102775	0.00568755
ENSG00000174748	132235	0.700561	0.162339	4.31542	1.59297e-05	0.0016696
ENSG00000239523	231.954	0.702202	0.243454	2.88433	0.00392244	0.0595685
ENSG00000204304	1616.75	0.702813	0.143089	4.9117	9.02905e-07	0.000273919
ENSG00000154277	35100.3	0.702885	0.174166	4.03572	5.44357e-05	0.00372831
ENSG00000186468	75861.8	0.703784	0.227698	3.09086	0.00199575	0.0400108
ENSG00000198169	513.692	0.704258	0.225088	3.12881	0.00175515	0.0376472
ENSG00000089157	231594	0.704404	0.163672	4.30374	1.67936e-05	0.00172103
ENSG00000165507	1182.15	0.705697	0.230195	3.06564	0.00217203	0.0421025
ENSG00000185022	782.282	0.705795	0.228831	3.08435	0.00203994	0.0403854
ENSG00000113758	2968.73	0.706843	0.24809	2.84914	0.00438369	0.0643143
ENSG00000084207	58544.1	0.707325	0.242825	2.9129	0.00358094	0.0566198
ENSG00000103266	2005.76	0.707365	0.22692	3.11724	0.00182552	0.0382278
ENSG00000256269	1595.48	0.709065	0.160728	4.41158	1.02619e-05	0.00129321
ENSG00000277075	243.727	0.709267	0.269272	2.63402	0.00843804	0.098432
ENSG00000168476	1214.3	0.712359	0.235404	3.02611	0.00247726	0.0452149
ENSG00000087077	2524.9	0.712449	0.244852	2.90971	0.00361766	0.05694
ENSG00000263072	445.459	0.71373	0.248413	2.87316	0.00406388	0.0610465
ENSG00000167272	2255.82	0.714881	0.177409	4.02955	5.58828e-05	0.00378989
ENSG00000100445	855.685	0.716002	0.206034	3.47517	0.000510534	0.0171438
ENSG00000167553	20087.4	0.716416	0.238854	2.99939	0.00270524	0.0479218
ENSG00000105619	422.761	0.71845	0.265295	2.70812	0.00676659	0.0849507
ENSG00000114391	60398.4	0.722033	0.219773	3.28535	0.00101854	0.0273622
ENSG00000081692	1617.98	0.723478	0.207189	3.49188	0.000479639	0.0163153
ENSG00000225200	536.467	0.725197	0.213587	3.39532	0.00068549	0.021075
ENSG00000170315	32885.5	0.725672	0.145723	4.97982	6.3645e-07	0.000231718
ENSG00000166441	57315.8	0.728007	0.233395	3.1192	0.00181342	0.0382278
ENSG00000181218	1829.71	0.728675	0.251452	2.89786	0.00375714	0.0583753
ENSG00000136942	57705.9	0.730467	0.188143	3.8825	0.000103386	0.00569861
ENSG00000274750	656.132	0.731051	0.229158	3.19016	0.00142195	0.0335139
ENSG00000148926	620.711	0.731204	0.221429	3.3022	0.000959298	0.0263265
ENSG00000109103	1977.13	0.731548	0.197012	3.71322	0.000204638	0.00918149
ENSG00000135587	286.656	0.732578	0.21328	3.43482	0.000592942	0.0190776
ENSG00000163702	512.981	0.733688	0.262548	2.79449	0.0051981	0.0718438
ENSG00000116521	5610.21	0.734378	0.165133	4.44718	8.70033e-06	0.00118009
ENSG00000257167	350.72	0.735366	0.224718	3.27239	0.00106641	0.0281561
ENSG00000233016	4323.17	0.735743	0.247795	2.96916	0.00298614	0.0508159
ENSG00000037757	1221.39	0.736144	0.192749	3.81919	0.00013389	0.00691181
ENSG00000011009	5091.47	0.737074	0.232611	3.1687	0.00153121	0.034853
ENSG00000101361	50389.4	0.742442	0.199437	3.72269	0.000197113	0.00894119
ENSG00000046647	233.106	0.743487	0.211364	3.51757	0.000435512	0.0152539
ENSG00000231500	125402	0.743762	0.210083	3.54032	0.000399636	0.0143984
ENSG00000155287	1075.77	0.744417	0.212082	3.51004	0.000448032	0.0155352
ENSG00000115268	42215.3	0.745189	0.261501	2.84967	0.0043765	0.0643143
ENSG00000181524	273.236	0.747565	0.274442	2.72394	0.00645081	0.0822982
ENSG00000215021	15984.8	0.758009	0.175752	4.31295	1.61094e-05	0.00167574
ENSG00000179526	974.772	0.758861	0.288288	2.63231	0.00848076	0.0986807
ENSG00000147403	105309	0.759322	0.19141	3.96699	7.27857e-05	0.00457075
ENSG00000142484	2409.21	0.760755	0.255192	2.98111	0.00287203	0.0496345
ENSG00000167136	485.768	0.761441	0.238991	3.18607	0.0014422	0.033773
ENSG00000126934	3611.38	0.762102	0.24647	3.09207	0.00198768	0.0399703
ENSG00000100650	6732.37	0.762365	0.24602	3.09879	0.00194315	0.0393033
ENSG00000198242	84516.3	0.762668	0.200342	3.80683	0.000140757	0.00718586
ENSG00000108641	639.87	0.768575	0.191373	4.01611	5.91677e-05	0.00393551
ENSG00000144713	166625	0.768966	0.232866	3.30218	0.000959372	0.0263265
ENSG00000142534	166462	0.769136	0.212548	3.61866	0.000296137	0.0118932
ENSG00000197958	108197	0.76945	0.195925	3.92726	8.59185e-05	0.00510173
ENSG00000084764	141.598	0.772572	0.278215	2.77689	0.00548815	0.0743668
ENSG00000101246	850.787	0.775259	0.220204	3.52064	0.000430511	0.0151272
ENSG00000172809	31934.2	0.775567	0.177747	4.36331	1.28108e-05	0.00150202
ENSG00000280670	736.97	0.775881	0.237382	3.26849	0.00108122	0.0283845
ENSG00000242071	307.121	0.779457	0.206191	3.78026	0.000156665	0.00765886
ENSG00000110700	56454.6	0.781228	0.184072	4.24415	2.19425e-05	0.00203976
ENSG00000106077	250.497	0.782125	0.240935	3.24621	0.00116951	0.0297978
ENSG00000176170	1742.09	0.786154	0.242119	3.24698	0.00116637	0.0297761
ENSG00000105401	5102.67	0.786988	0.179095	4.39426	1.11153e-05	0.00137049
ENSG00000125434	131.624	0.787992	0.273907	2.87686	0.00401658	0.0605991
ENSG00000114942	72142.3	0.790187	0.180097	4.38756	1.14628e-05	0.00137049
ENSG00000025434	1892.23	0.790586	0.212901	3.7134	0.000204496	0.00918149
ENSG00000109065	1489.52	0.791428	0.190152	4.16209	3.15345e-05	0.00251079
ENSG00000140365	3521.25	0.792838	0.235936	3.36039	0.000778325	0.0227656
ENSG00000143793	778.75	0.79364	0.197066	4.02728	5.64264e-05	0.00380244
ENSG00000159335	18538.3	0.795238	0.186318	4.26817	1.97084e-05	0.00192995
ENSG00000233328	207.865	0.795275	0.292708	2.71695	0.00658859	0.0835474
ENSG00000064961	1977.83	0.79554	0.285247	2.78895	0.00528792	0.0726967
ENSG00000163870	1359.11	0.796602	0.209906	3.79504	0.000147617	0.00744659
ENSG00000242299	835.469	0.796648	0.23059	3.45483	0.000550642	0.0180953
ENSG00000184162	2265.97	0.797791	0.247215	3.22711	0.00125046	0.031284
ENSG00000145741	18927.6	0.798437	0.186523	4.28065	1.86349e-05	0.00185478
ENSG00000221983	45805.6	0.798534	0.209496	3.81169	0.000138021	0.00709165
ENSG00000227081	584.435	0.799773	0.276136	2.89631	0.00377584	0.0585235
ENSG00000165175	2742.27	0.80105	0.202312	3.95948	7.51147e-05	0.00463934
ENSG00000115129	892.434	0.802338	0.221746	3.61827	0.000296578	0.0118932
ENSG00000145919	10354.4	0.805559	0.201458	3.99865	6.37043e-05	0.00413779
ENSG00000240376	440.461	0.80779	0.222096	3.63712	0.000275699	0.0113521
ENSG00000133142	1189.16	0.808048	0.253067	3.19302	0.00140794	0.0335051
ENSG00000260708	361.09	0.809616	0.27982	2.89335	0.00381161	0.0586815
ENSG00000162300	778.837	0.812709	0.231494	3.51071	0.000446906	0.015535
ENSG00000241741	113.056	0.816923	0.289267	2.82411	0.00474118	0.0677103
ENSG00000131469	68380.8	0.817588	0.164472	4.97098	6.66167e-07	0.000236318
ENSG00000161547	13055.6	0.818378	0.196641	4.16178	3.15777e-05	0.00251079
ENSG00000172922	1919.16	0.819911	0.218753	3.74811	0.000178173	0.00833772
ENSG00000075399	422.723	0.820285	0.269731	3.04112	0.002357	0.0441858
ENSG00000099899	1221.73	0.822163	0.292563	2.8102	0.004951	0.0695402
ENSG00000119655	4392.89	0.822523	0.171657	4.79168	1.65393e-06	0.000387833
ENSG00000174327	571.95	0.822554	0.263808	3.11801	0.00182077	0.0382278
ENSG00000112337	196.768	0.823056	0.266855	3.08428	0.00204044	0.0403854
ENSG00000143224	341.586	0.824251	0.301559	2.7333	0.00627039	0.0812254
ENSG00000140988	139838	0.826466	0.230826	3.58047	0.000342979	0.0131809
ENSG00000203879	1786.18	0.826895	0.213456	3.87384	0.000107135	0.00584782
ENSG00000117448	10645.8	0.828414	0.184973	4.47858	7.51425e-06	0.00108291
ENSG00000103496	1104.13	0.830625	0.157469	5.27485	1.32863e-07	0.000106498
ENSG00000088926	173.065	0.832434	0.243465	3.41911	0.000628265	0.019816
ENSG00000234782	390.131	0.833722	0.213577	3.9036	9.47708e-05	0.00544047
ENSG00000184436	1335.71	0.834276	0.311323	2.67978	0.00736708	0.0898
ENSG00000008988	52785.6	0.838329	0.215305	3.89367	9.87372e-05	0.00559848
ENSG00000266962	488.448	0.838811	0.244443	3.43152	0.000600215	0.0192668
ENSG00000125691	113828	0.839037	0.19384	4.3285	1.50126e-05	0.00162266
ENSG00000107140	546.032	0.841211	0.290456	2.89617	0.00377749	0.0585235
ENSG00000167526	69251.1	0.843373	0.199698	4.22324	2.40811e-05	0.00216339
ENSG00000160050	124.788	0.844459	0.31043	2.72028	0.00652261	0.0829414
ENSG00000132205	697.378	0.844472	0.218929	3.85729	0.000114649	0.00610065
ENSG00000246705	2517.65	0.84504	0.300881	2.80855	0.00497645	0.069558
ENSG00000257702	308.618	0.845092	0.252351	3.34887	0.000811408	0.023436
ENSG00000127419	552.965	0.847725	0.292762	2.89562	0.00378414	0.058561
ENSG00000188493	1074.62	0.848056	0.239655	3.53866	0.000402167	0.0144519
ENSG00000180211	243.172	0.84925	0.23724	3.5797	0.000343984	0.0131829
ENSG00000163703	975.864	0.850192	0.252697	3.36447	0.0007669	0.0226432
ENSG00000220472	122.103	0.850617	0.301979	2.81681	0.0048503	0.0685775
ENSG00000162344	1011.19	0.854131	0.274349	3.1133	0.0018501	0.0384903
ENSG00000158793	1358.36	0.855238	0.25582	3.34313	0.000828396	0.0238036
ENSG00000197757	458.36	0.855343	0.223034	3.83503	0.000125548	0.0065299
ENSG00000221968	943.306	0.855565	0.231423	3.69697	0.000218184	0.00952234
ENSG00000104957	656.089	0.856217	0.281626	3.04027	0.00236368	0.044251
ENSG00000142632	256.643	0.856696	0.288613	2.96832	0.00299435	0.050893
ENSG00000100823	11566.3	0.857654	0.208888	4.10581	4.02904e-05	0.0029836
ENSG00000102103	4303.03	0.865294	0.168196	5.14455	2.6817e-07	0.000132505
ENSG00000170801	135.068	0.865819	0.313854	2.75867	0.00580369	0.0772059
ENSG00000104960	2806.37	0.867155	0.251388	3.44947	0.000561681	0.0184144
ENSG00000133112	224537	0.868942	0.172495	5.03748	4.71692e-07	0.000184792
ENSG00000223658	117.211	0.869632	0.296168	2.93628	0.00332175	0.054213
ENSG00000143878	3043.4	0.878758	0.252365	3.4821	0.0004975	0.0167876
ENSG00000178821	186.447	0.883128	0.334865	2.63726	0.00835779	0.0979086
ENSG00000266010	142.578	0.884208	0.287708	3.07329	0.00211716	0.0414299
ENSG00000179743	208.818	0.884433	0.330716	2.67429	0.00748866	0.0908822
ENSG00000241680	83.1379	0.884601	0.335107	2.63976	0.00829653	0.0973558
ENSG00000169660	314.685	0.887765	0.273416	3.24695	0.00116651	0.0297761
ENSG00000122952	8382.12	0.891828	0.230597	3.86748	0.000109968	0.00591986
ENSG00000214756	270.738	0.892529	0.298358	2.99147	0.00277636	0.0489312
ENSG00000175756	3532.04	0.893168	0.267833	3.3348	0.000853616	0.0244004
ENSG00000130299	1437.09	0.895534	0.199322	4.49291	7.0257e-06	0.00104517
ENSG00000239246	72.6904	0.9011	0.338444	2.66248	0.00775673	0.0928082
ENSG00000237214	128.301	0.902417	0.277312	3.25416	0.00113729	0.0293007
ENSG00000236801	96.5255	0.906126	0.296033	3.0609	0.00220675	0.0425807
ENSG00000178096	239.939	0.906498	0.302406	2.99762	0.002721	0.0481393
ENSG00000196756	2635.3	0.908107	0.261609	3.47124	0.000518064	0.0173545
ENSG00000197070	299.33	0.910472	0.295162	3.08465	0.0020379	0.0403854
ENSG00000244313	626.892	0.910807	0.191012	4.76831	1.85776e-06	0.000428368
ENSG00000182796	302.644	0.914724	0.347231	2.63434	0.00843011	0.098432
ENSG00000099622	5240.7	0.916442	0.169066	5.42061	5.93974e-08	7.1912e-05
ENSG00000125458	564.493	0.918354	0.216394	4.24389	2.19677e-05	0.00203976
ENSG00000071889	477.211	0.92079	0.303509	3.03382	0.00241482	0.0446701
ENSG00000171163	926.454	0.921454	0.27515	3.34892	0.000811285	0.023436
ENSG00000172687	883.763	0.922564	0.285992	3.22584	0.00125602	0.0313101
ENSG00000063177	57222.5	0.925881	0.253968	3.64565	0.000266713	0.011081
ENSG00000162910	1752.57	0.926855	0.34857	2.65902	0.00783675	0.0929061
ENSG00000102317	25776.3	0.929754	0.253005	3.67485	0.000237993	0.0101001
ENSG00000213465	330.244	0.931912	0.334448	2.78642	0.00532934	0.0730014
ENSG00000144199	204.475	0.933237	0.25996	3.58992	0.000330776	0.012964
ENSG00000111665	3780.53	0.937074	0.205937	4.55029	5.35718e-06	0.000871959
ENSG00000111671	722.783	0.939245	0.291143	3.22606	0.00125507	0.0313101
ENSG00000169100	7169.97	0.940163	0.346605	2.71249	0.00667793	0.0842198
ENSG00000213866	315.245	0.942422	0.301484	3.12595	0.00177234	0.0377816
ENSG00000104518	545.918	0.943449	0.341263	2.76458	0.00569966	0.0762419
ENSG00000197989	2261.54	0.944943	0.337753	2.79774	0.00514618	0.0711974
ENSG00000148341	1026.51	0.945869	0.21115	4.47962	7.47772e-06	0.00108291
ENSG00000253341	243.612	0.947397	0.342765	2.76398	0.00571006	0.0762535
ENSG00000123416	71055.4	0.949832	0.27181	3.49447	0.000475003	0.0162264
ENSG00000145592	215636	0.950771	0.204526	4.64866	3.34091e-06	0.000651007
ENSG00000105193	78859.3	0.95116	0.160373	5.93091	3.01265e-09	6.94667e-06
ENSG00000113108	155.366	0.953847	0.357314	2.6695	0.00759653	0.091615
ENSG00000171425	991.145	0.957779	0.211845	4.52112	6.15124e-06	0.000961678
ENSG00000114315	840.462	0.95928	0.208428	4.60246	4.17537e-06	0.000740592
ENSG00000060138	5257.31	0.960705	0.266329	3.60721	0.000309505	0.0123046
ENSG00000243964	150.478	0.962625	0.313374	3.07181	0.00212768	0.0415183
ENSG00000144134	112.569	0.964323	0.353176	2.73043	0.00632511	0.0814027
ENSG00000164587	61208.7	0.970263	0.197425	4.91458	8.89737e-07	0.000273919
ENSG00000172732	1061.42	0.970311	0.210662	4.60601	4.10478e-06	0.000737528
ENSG00000232472	537.48	0.97148	0.206701	4.69992	2.60269e-06	0.000553973
ENSG00000011422	260.256	0.972068	0.362464	2.68183	0.00732196	0.089487
ENSG00000162244	55237.9	0.975801	0.243327	4.01025	6.06541e-05	0.00397701
ENSG00000178927	1367.26	0.97958	0.241701	4.05286	5.05962e-05	0.00353534
ENSG00000077312	3759.33	0.982356	0.225068	4.36471	1.27293e-05	0.00150202
ENSG00000083845	80795.8	0.986855	0.211516	4.66564	3.07661e-06	0.000644923
ENSG00000178922	527.611	0.987919	0.312324	3.16312	0.00156087	0.0352277
ENSG00000230897	177.259	0.989237	0.312556	3.16499	0.00155086	0.0351165
ENSG00000197448	7163.79	0.990327	0.231011	4.28692	1.81167e-05	0.00182785
ENSG00000253716	210.978	0.994354	0.3386	2.93666	0.00331765	0.054213
ENSG00000232888	312.933	0.999936	0.267253	3.74154	0.000182899	0.00849131
ENSG00000100299	225.442	1.00139	0.348015	2.87744	0.00400921	0.060554
ENSG00000188483	243.034	1.00534	0.309434	3.24896	0.0011583	0.029731
ENSG00000108107	57420.4	1.01081	0.237481	4.25639	2.07752e-05	0.00196866
ENSG00000272599	289.414	1.01114	0.327267	3.08965	0.00200393	0.0400641
ENSG00000067836	438.426	1.01203	0.27495	3.68077	0.000232534	0.00992935
ENSG00000279227	171.934	1.01363	0.308228	3.28856	0.001007	0.0272106
ENSG00000185189	157.625	1.01714	0.348013	2.92272	0.00346985	0.0556262
ENSG00000167604	307.991	1.01767	0.246057	4.13591	3.53551e-05	0.00276349
ENSG00000132744	653.108	1.02037	0.334277	3.05246	0.00226977	0.043135
ENSG00000213261	145.449	1.02042	0.284592	3.58556	0.000336361	0.013091
ENSG00000213433	78.0681	1.02073	0.348247	2.93105	0.00337815	0.0549127
ENSG00000137970	520.523	1.02465	0.383831	2.66952	0.00759589	0.091615
ENSG00000157379	411.493	1.0252	0.261245	3.9243	8.69819e-05	0.00512083
ENSG00000244398	686.483	1.03204	0.305713	3.37586	0.000735857	0.0219764
ENSG00000213339	682.252	1.0325	0.323479	3.19186	0.00141362	0.0335051
ENSG00000258311	184.579	1.03288	0.304995	3.38656	0.00070775	0.021475
ENSG00000227252	72.0761	1.03446	0.331594	3.11966	0.00181062	0.0382278
ENSG00000185803	615.36	1.03933	0.322896	3.21876	0.00128744	0.0317052
ENSG00000227615	5878.71	1.0404	0.24397	4.26447	2.00381e-05	0.00193865
ENSG00000162032	280.709	1.041	0.3552	2.93073	0.00338169	0.0549127
ENSG00000185000	1795.72	1.04107	0.359137	2.89882	0.00374575	0.058293
ENSG00000173992	3618.32	1.04217	0.210689	4.94651	7.55561e-07	0.000246841
ENSG00000132879	869.675	1.043	0.261816	3.98369	6.78531e-05	0.0043406
ENSG00000214391	98.3543	1.04744	0.333494	3.14079	0.00168491	0.0367678
ENSG00000228501	85.5429	1.05162	0.337371	3.1171	0.00182643	0.0382278
ENSG00000236552	740.937	1.05165	0.29371	3.58056	0.000342854	0.0131809
ENSG00000259943	544.387	1.05198	0.250009	4.20778	2.57897e-05	0.00223
ENSG00000148824	184.482	1.05853	0.291844	3.62705	0.000286678	0.0117343
ENSG00000107593	162.221	1.06497	0.384579	2.76918	0.00561984	0.0757065
ENSG00000233913	121.652	1.06701	0.281735	3.78728	0.000152306	0.00757968
ENSG00000178464	154.678	1.07396	0.319351	3.36294	0.000771157	0.0226517
ENSG00000146826	728.756	1.07655	0.208484	5.16371	2.42108e-07	0.00012883
ENSG00000105372	122968	1.07755	0.20486	5.25996	1.44089e-07	0.000106498
ENSG00000160813	843.122	1.07781	0.272539	3.95469	7.66354e-05	0.00471222
ENSG00000234851	591.124	1.08021	0.3013	3.58517	0.000336854	0.013091
ENSG00000065978	147225	1.08318	0.200262	5.40881	6.34433e-08	7.1912e-05
ENSG00000120129	1199.27	1.08389	0.257426	4.21048	2.54825e-05	0.00223
ENSG00000239779	106.208	1.08453	0.384137	2.8233	0.00475324	0.0677103
ENSG00000218426	469.198	1.08784	0.287724	3.78084	0.000156298	0.00765886
ENSG00000230202	234.029	1.08813	0.246677	4.41115	1.02821e-05	0.00129321
ENSG00000225178	969.349	1.08941	0.209465	5.2009	1.98326e-07	0.000119298
ENSG00000223803	275	1.09042	0.210517	5.17975	2.22188e-07	0.000122959
ENSG00000273080	94.2668	1.09291	0.310394	3.52104	0.000429855	0.0151272
ENSG00000241685	18250.7	1.09808	0.318601	3.44658	0.000567727	0.0185686
ENSG00000099860	492.06	1.09974	0.360549	3.05018	0.00228705	0.0434037
ENSG00000213347	600.222	1.0998	0.402247	2.73415	0.00625418	0.0811693
ENSG00000220583	218.958	1.10206	0.30351	3.63104	0.00028228	0.0115886
ENSG00000217027	103.788	1.10588	0.317286	3.48542	0.000491357	0.0166208
ENSG00000168028	157276	1.10795	0.20527	5.39751	6.75718e-08	7.1912e-05
ENSG00000146677	609.576	1.11265	0.220288	5.05088	4.39778e-07	0.000184373
ENSG00000269335	164.623	1.11521	0.300738	3.70824	0.000208707	0.00931441
ENSG00000231424	99.3394	1.11582	0.321664	3.46891	0.000522578	0.0174635
ENSG00000225335	45.233	1.11942	0.409834	2.73141	0.00630648	0.0814027
ENSG00000241935	169.113	1.13041	0.402497	2.80849	0.00497741	0.069558
ENSG00000224861	422.609	1.13505	0.220444	5.14891	2.62001e-07	0.000132505
ENSG00000271895	111.527	1.13509	0.40964	2.77094	0.00558948	0.0754444
ENSG00000231234	83.8662	1.13822	0.349337	3.25824	0.00112104	0.0289899
ENSG00000064490	1874.59	1.14295	0.207861	5.49862	3.82766e-08	5.88396e-05
ENSG00000186010	93.5467	1.14957	0.382607	3.00458	0.00265949	0.0474761
ENSG00000235552	473.331	1.15321	0.387199	2.97833	0.00289823	0.0498718
ENSG00000242125	13322.4	1.15477	0.220786	5.23027	1.69266e-07	0.000111514
ENSG00000241431	62.5614	1.16783	0.368151	3.17216	0.0015131	0.0347161
ENSG00000123388	220.802	1.17299	0.284209	4.1272	3.67212e-05	0.0028382
ENSG00000010278	232.53	1.18035	0.272362	4.33374	1.46597e-05	0.0016152
ENSG00000099849	615.391	1.19143	0.412866	2.88576	0.00390475	0.0594959
ENSG00000213362	208.312	1.19243	0.396516	3.00727	0.00263607	0.0471755
ENSG00000177600	50363.2	1.19301	0.274652	4.3437	1.401e-05	0.00158876
ENSG00000272716	60.8398	1.20589	0.395868	3.04619	0.00231763	0.0438096
ENSG00000105640	28424.5	1.20923	0.352797	3.42756	0.00060903	0.0194591
ENSG00000178715	59.6786	1.20943	0.415952	2.90763	0.00364183	0.0571904
ENSG00000257660	52.0495	1.215	0.401361	3.0272	0.00246831	0.0451351
ENSG00000278272	92.6181	1.24735	0.448572	2.78072	0.00542392	0.0740039
ENSG00000250988	69.2057	1.25116	0.347196	3.60361	0.000313834	0.0124409
ENSG00000092094	1808.44	1.25286	0.258256	4.85125	1.22685e-06	0.000326414
ENSG00000214612	205.094	1.25493	0.297959	4.21175	2.53401e-05	0.00223
ENSG00000231767	229.771	1.25897	0.333973	3.76968	0.000163457	0.0078522
ENSG00000253898	14262.2	1.2645	0.244073	5.18084	2.20887e-07	0.000122959
ENSG00000267796	119.109	1.26516	0.407403	3.10543	0.00189999	0.0388278
ENSG00000212802	845.419	1.26671	0.286781	4.41699	1.00084e-05	0.00128209
ENSG00000127564	407.96	1.27011	0.316706	4.01039	6.06197e-05	0.00397701
ENSG00000226608	1897.52	1.27097	0.303664	4.18545	2.84605e-05	0.00237199
ENSG00000167996	389984	1.28012	0.261321	4.89867	9.64893e-07	0.000284027
ENSG00000250321	153.402	1.2858	0.406622	3.16215	0.00156607	0.0352487
ENSG00000087086	574806	1.29248	0.277784	4.65281	3.27439e-06	0.000651007
ENSG00000213621	77.1978	1.29258	0.406472	3.17999	0.00147279	0.0340168
ENSG00000210082	632760	1.29425	0.257503	5.02616	5.00394e-07	0.000187107
ENSG00000213315	194.597	1.30438	0.416683	3.13039	0.00174574	0.0375935
ENSG00000115468	95.0426	1.30933	0.445601	2.93834	0.00329971	0.054213
ENSG00000185838	137.866	1.335	0.487456	2.73871	0.00616809	0.0803039
ENSG00000240463	86.6637	1.35147	0.367166	3.68081	0.000232499	0.00992935
ENSG00000231167	357.588	1.35425	0.301408	4.49308	7.02004e-06	0.00104517
ENSG00000129654	82.6754	1.3655	0.439153	3.10941	0.00187464	0.0385448
ENSG00000239559	1839.15	1.37828	0.363757	3.78902	0.000151244	0.00755399
ENSG00000215030	912.459	1.37887	0.332868	4.1424	3.43696e-05	0.00270172
ENSG00000223361	57.4155	1.38031	0.429813	3.21143	0.00132075	0.0322268
ENSG00000218175	868.986	1.38044	0.282377	4.88864	1.01536e-06	0.000292657
ENSG00000102125	233.418	1.3975	0.297012	4.70519	2.53635e-06	0.000552208
ENSG00000240087	66.0466	1.40116	0.413615	3.3876	0.000705063	0.021475
ENSG00000213453	67.2884	1.41348	0.396072	3.56875	0.000358682	0.0134908
ENSG00000276966	177.18	1.41906	0.404115	3.51153	0.000445532	0.0155263
ENSG00000226360	207.398	1.42799	0.370983	3.8492	0.000118502	0.00621015
ENSG00000204237	501.455	1.44319	0.303613	4.75338	2.00041e-06	0.0004537
ENSG00000137818	272475	1.4574	0.316152	4.6098	4.03059e-06	0.000737528
ENSG00000228929	414.018	1.45822	0.370634	3.93439	8.34076e-05	0.00503906
ENSG00000274267	53.9648	1.46043	0.473929	3.08154	0.00205934	0.0406433
ENSG00000219507	565.661	1.46097	0.325071	4.4943	6.97985e-06	0.00104517
ENSG00000214016	54.6222	1.48829	0.510411	2.91586	0.00354714	0.056273
ENSG00000270195	77.0659	1.49836	0.505748	2.96267	0.00304981	0.0513962
ENSG00000239269	60.4762	1.4997	0.399239	3.75639	0.000172379	0.00813947
ENSG00000177679	61.391	1.50236	0.495941	3.0293	0.00245118	0.0450746
ENSG00000226855	47.5704	1.52047	0.508509	2.99006	0.00278926	0.0490959
ENSG00000174365	486.126	1.52786	0.300369	5.08659	3.64556e-07	0.000172886
ENSG00000273723	94.6455	1.54554	0.462566	3.34123	0.000834067	0.0238909
ENSG00000242114	61.4739	1.55175	0.576856	2.69002	0.00714474	0.0879408
ENSG00000214535	185.917	1.55371	0.387573	4.00881	6.10242e-05	0.00398241
ENSG00000213442	515.28	1.55569	0.26229	5.93115	3.00813e-09	6.94667e-06
ENSG00000199753	252.109	1.62436	0.37591	4.32113	1.55234e-05	0.00165204
ENSG00000230076	80.7667	1.63721	0.464887	3.52173	0.000428738	0.0151272
ENSG00000243680	313.942	1.71068	0.318562	5.37	7.87355e-08	7.59304e-05
ENSG00000237506	95.0805	1.88612	0.423647	4.45211	8.50299e-06	0.00116474
ENSG00000244245	46.8225	1.95231	0.535184	3.64792	0.000264377	0.0110266
ENSG00000169228	75.6333	2.04606	0.449114	4.55577	5.21936e-06	0.00085964
ENSG00000240652	108.124	2.13301	0.420793	5.06901	3.9988e-07	0.000172886
ENSG00000174469	259.385	2.21643	0.352136	6.29423	3.08928e-10	1.42467e-06
ENSG00000226532	1838.35	2.24393	0.806238	2.78321	0.00538243	0.0736558
ENSG00000219222	52.8553	2.45096	0.651192	3.76381	0.000167346	0.00798355
ENSG00000214748	102.193	2.50299	0.448869	5.57622	2.45799e-08	4.25079e-05
