# Supplementary material
Source: HighWire-hosted journal article supplement (doi:10.1101/rna.080097.124)
Supplement: Supplemental_TableS06.xlsx [file Supplemental_TableS06.xlsx]

## Sheet: enrichment_results_polysomes_BP
geneSet	description	link	enrichmentScore	normalizedEnrichmentScore	pValue	FDR	size	leadingEdgeNum	userId
GO:0034502	protein localization to chromosome	http://amigo.geneontology.org/amigo/term/GO:0034502	-0.538096	-2.21086	0	0.00108923	78	37	ENSG00000040275;ENSG00000062650;ENSG00000079246;ENSG00000080986;ENSG00000085224;ENSG00000086827;ENSG00000095002;ENSG00000102974;ENSG00000107854;ENSG00000112742;ENSG00000113141;ENSG00000115484;ENSG00000125885;ENSG00000129933;ENSG00000130119;ENSG00000130826;ENSG00000132383;ENSG00000132604;ENSG00000133302;ENSG00000135624;ENSG00000139618;ENSG00000139687;ENSG00000146731;ENSG00000147601;ENSG00000150753…
GO:0006403	RNA localization	http://amigo.geneontology.org/amigo/term/GO:0006403	-0.460403	-2.19987	0	0.000605128	214	83	ENSG00000011243;ENSG00000047410;ENSG00000058729;ENSG00000069248;ENSG00000073792;ENSG00000074356;ENSG00000079134;ENSG00000082898;ENSG00000091009;ENSG00000093000;ENSG00000095319;ENSG00000100811;ENSG00000102900;ENSG00000108559;ENSG00000109111;ENSG00000111581;ENSG00000111605;ENSG00000113569;ENSG00000115484;ENSG00000116560;ENSG00000116698;ENSG00000116754;ENSG00000117174;ENSG00000119203;ENSG00000119392…
GO:0033044	regulation of chromosome organization	http://amigo.geneontology.org/amigo/term/GO:0033044	-0.446693	-2.19537	0	0.000564786	281	121	ENSG00000004487;ENSG00000004897;ENSG00000005483;ENSG00000006712;ENSG00000008083;ENSG00000010244;ENSG00000011243;ENSG00000012048;ENSG00000013810;ENSG00000020426;ENSG00000020922;ENSG00000036257;ENSG00000040275;ENSG00000047410;ENSG00000053900;ENSG00000058729;ENSG00000062650;ENSG00000066135;ENSG00000073050;ENSG00000073614;ENSG00000075856;ENSG00000079246;ENSG00000080345;ENSG00000080986;ENSG00000082068…
GO:0072350	tricarboxylic acid metabolic process	http://amigo.geneontology.org/amigo/term/GO:0072350	-0.628809	-2.1797	0	0.000574872	34	15	ENSG00000014641;ENSG00000073578;ENSG00000082212;ENSG00000091483;ENSG00000112992;ENSG00000119689;ENSG00000122729;ENSG00000136143;ENSG00000136381;ENSG00000138413;ENSG00000146701;ENSG00000148672;ENSG00000150768;ENSG00000172340;ENSG00000181192
GO:0007059	chromosome segregation	http://amigo.geneontology.org/amigo/term/GO:0007059	-0.435283	-2.129	0	0.00118605	265	109	ENSG00000004897;ENSG00000010244;ENSG00000010292;ENSG00000011243;ENSG00000013810;ENSG00000020922;ENSG00000031691;ENSG00000036257;ENSG00000040275;ENSG00000047410;ENSG00000053900;ENSG00000058729;ENSG00000062650;ENSG00000070950;ENSG00000072501;ENSG00000076242;ENSG00000076382;ENSG00000077097;ENSG00000079616;ENSG00000080986;ENSG00000083535;ENSG00000083642;ENSG00000085224;ENSG00000086827;ENSG00000090889…
GO:1902850	microtubule cytoskeleton organization involved in mitosis	http://amigo.geneontology.org/amigo/term/GO:1902850	-0.472387	-2.09243	0	0.00209778	123	44	ENSG00000007168;ENSG00000010244;ENSG00000013810;ENSG00000040275;ENSG00000047410;ENSG00000064102;ENSG00000066629;ENSG00000068796;ENSG00000072501;ENSG00000080986;ENSG00000083535;ENSG00000086827;ENSG00000090889;ENSG00000101350;ENSG00000101972;ENSG00000108055;ENSG00000108424;ENSG00000110318;ENSG00000112742;ENSG00000117650;ENSG00000118007;ENSG00000119541;ENSG00000134057;ENSG00000136861;ENSG00000137804…
GO:0043631	RNA polyadenylation	http://amigo.geneontology.org/amigo/term/GO:0043631	-0.56009	-2.07711	0	0.00236864	46	19	ENSG00000006712;ENSG00000100722;ENSG00000101811;ENSG00000103549;ENSG00000107951;ENSG00000111605;ENSG00000119203;ENSG00000125755;ENSG00000134371;ENSG00000136709;ENSG00000136937;ENSG00000138035;ENSG00000142192;ENSG00000145216;ENSG00000155827;ENSG00000164944;ENSG00000165934;ENSG00000166477;ENSG00000168710
GO:0071103	DNA conformation change	http://amigo.geneontology.org/amigo/term/GO:0071103	-0.433863	-2.04522	0	0.00350974	198	67	ENSG00000006712;ENSG00000010292;ENSG00000011243;ENSG00000020426;ENSG00000047410;ENSG00000048649;ENSG00000062650;ENSG00000068878;ENSG00000075856;ENSG00000076003;ENSG00000077097;ENSG00000079246;ENSG00000079785;ENSG00000083168;ENSG00000085224;ENSG00000096063;ENSG00000100813;ENSG00000100888;ENSG00000101596;ENSG00000102038;ENSG00000102974;ENSG00000104320;ENSG00000104738;ENSG00000104884;ENSG00000109805…
GO:0030048	actin filament-based movement	http://amigo.geneontology.org/amigo/term/GO:0030048	-0.506792	-2.04072	0	0.00332148	70	32	ENSG00000046604;ENSG00000049759;ENSG00000054654;ENSG00000057294;ENSG00000067900;ENSG00000075711;ENSG00000096696;ENSG00000099331;ENSG00000106299;ENSG00000109063;ENSG00000113569;ENSG00000115109;ENSG00000116030;ENSG00000128641;ENSG00000133026;ENSG00000134755;ENSG00000137474;ENSG00000137942;ENSG00000139926;ENSG00000145349;ENSG00000152642;ENSG00000152661;ENSG00000155657;ENSG00000157483;ENSG00000158195…
GO:0006397	mRNA processing	http://amigo.geneontology.org/amigo/term/GO:0006397	-0.394665	-2.02083	0	0.00404226	438	133	ENSG00000004487;ENSG00000006712;ENSG00000011243;ENSG00000011304;ENSG00000020426;ENSG00000021776;ENSG00000033030;ENSG00000039123;ENSG00000047315;ENSG00000060339;ENSG00000061936;ENSG00000064703;ENSG00000068394;ENSG00000074356;ENSG00000075856;ENSG00000076650;ENSG00000079134;ENSG00000079785;ENSG00000082516;ENSG00000084093;ENSG00000084463;ENSG00000086589;ENSG00000087365;ENSG00000088930;ENSG00000089682…
GO:1901998	toxin transport	http://amigo.geneontology.org/amigo/term/GO:1901998	-0.592893	-2.00513	0	0.00469799	30	15	ENSG00000070018;ENSG00000086061;ENSG00000092108;ENSG00000099250;ENSG00000103671;ENSG00000115484;ENSG00000117713;ENSG00000135624;ENSG00000150712;ENSG00000150753;ENSG00000156261;ENSG00000163297;ENSG00000163468;ENSG00000166226;ENSG00000184432
GO:0007051	spindle organization	http://amigo.geneontology.org/amigo/term/GO:0007051	-0.439974	-2.00488	0	0.0043065	151	81	ENSG00000010244;ENSG00000013810;ENSG00000021574;ENSG00000047410;ENSG00000047849;ENSG00000064102;ENSG00000066279;ENSG00000066629;ENSG00000068796;ENSG00000072501;ENSG00000074054;ENSG00000075702;ENSG00000075711;ENSG00000076242;ENSG00000076382;ENSG00000080986;ENSG00000083535;ENSG00000085224;ENSG00000087586;ENSG00000088325;ENSG00000088970;ENSG00000090889;ENSG00000100242;ENSG00000101350;ENSG00000101639…
GO:0034453	microtubule anchoring	http://amigo.geneontology.org/amigo/term/GO:0034453	-0.635657	-2.00295	0.000356952	0.00408694	23	13	ENSG00000078674;ENSG00000100503;ENSG00000131437;ENSG00000133393;ENSG00000135837;ENSG00000135968;ENSG00000140463;ENSG00000163539;ENSG00000166037;ENSG00000168172;ENSG00000173402;ENSG00000185963;ENSG00000204843
GO:0031503	protein-containing complex localization	http://amigo.geneontology.org/amigo/term/GO:0031503	-0.411825	-1.99005	0	0.0045644	235	91	ENSG00000004478;ENSG00000011243;ENSG00000030066;ENSG00000032742;ENSG00000047410;ENSG00000058729;ENSG00000068400;ENSG00000069248;ENSG00000069329;ENSG00000075711;ENSG00000078674;ENSG00000079134;ENSG00000079805;ENSG00000082898;ENSG00000083312;ENSG00000085832;ENSG00000090989;ENSG00000093000;ENSG00000095319;ENSG00000096872;ENSG00000100227;ENSG00000100815;ENSG00000101350;ENSG00000102900;ENSG00000103351…
GO:0032200	telomere organization	http://amigo.geneontology.org/amigo/term/GO:0032200	-0.438382	-1.96159	0	0.00621265	135	56	ENSG00000020922;ENSG00000035928;ENSG00000067066;ENSG00000073050;ENSG00000077514;ENSG00000079246;ENSG00000080345;ENSG00000080824;ENSG00000085224;ENSG00000085511;ENSG00000096384;ENSG00000101868;ENSG00000104320;ENSG00000107854;ENSG00000113522;ENSG00000114127;ENSG00000115484;ENSG00000116698;ENSG00000117650;ENSG00000121274;ENSG00000130119;ENSG00000130826;ENSG00000132383;ENSG00000132604;ENSG00000135624…
GO:0010927	cellular component assembly involved in morphogenesis	http://amigo.geneontology.org/amigo/term/GO:0010927	-0.504249	-1.96048	0	0.0059	57	32	ENSG00000007168;ENSG00000068305;ENSG00000071127;ENSG00000072415;ENSG00000081189;ENSG00000087053;ENSG00000100697;ENSG00000101605;ENSG00000104884;ENSG00000108946;ENSG00000109063;ENSG00000112367;ENSG00000115020;ENSG00000116906;ENSG00000117707;ENSG00000133026;ENSG00000134775;ENSG00000134853;ENSG00000137812;ENSG00000138594;ENSG00000141646;ENSG00000144747;ENSG00000144824;ENSG00000150093;ENSG00000155657…
GO:0051383	kinetochore organization	http://amigo.geneontology.org/amigo/term/GO:0051383	-0.647685	-1.95576	0.000178317	0.00595161	20	7	ENSG00000080986;ENSG00000112701;ENSG00000113810;ENSG00000117724;ENSG00000136824;ENSG00000138778;ENSG00000143228
GO:0044839	cell cycle G2/M phase transition	http://amigo.geneontology.org/amigo/term/GO:0044839	-0.409349	-1.93396	0	0.00746325	200	99	ENSG00000006611;ENSG00000007168;ENSG00000011243;ENSG00000012048;ENSG00000020922;ENSG00000053254;ENSG00000054282;ENSG00000055130;ENSG00000057935;ENSG00000058091;ENSG00000064313;ENSG00000072571;ENSG00000072803;ENSG00000074054;ENSG00000077380;ENSG00000078674;ENSG00000079805;ENSG00000080824;ENSG00000087206;ENSG00000087586;ENSG00000088325;ENSG00000092853;ENSG00000101624;ENSG00000101639;ENSG00000103540…
GO:0010639	negative regulation of organelle organization	http://amigo.geneontology.org/amigo/term/GO:0010639	-0.391939	-1.92994	0	0.00749722	291	118	ENSG00000004478;ENSG00000005156;ENSG00000008083;ENSG00000010244;ENSG00000012048;ENSG00000020426;ENSG00000040275;ENSG00000047410;ENSG00000047849;ENSG00000050405;ENSG00000062650;ENSG00000066135;ENSG00000066777;ENSG00000073050;ENSG00000073614;ENSG00000074695;ENSG00000079246;ENSG00000079805;ENSG00000080986;ENSG00000085224;ENSG00000086827;ENSG00000087274;ENSG00000087470;ENSG00000092108;ENSG00000096717…
GO:0031023	microtubule organizing center organization	http://amigo.geneontology.org/amigo/term/GO:0031023	-0.438416	-1.92027	0	0.00806031	119	57	ENSG00000007168;ENSG00000012048;ENSG00000044459;ENSG00000054282;ENSG00000054654;ENSG00000058272;ENSG00000075702;ENSG00000078674;ENSG00000082898;ENSG00000100503;ENSG00000101350;ENSG00000101624;ENSG00000101639;ENSG00000103540;ENSG00000103995;ENSG00000108395;ENSG00000111554;ENSG00000114166;ENSG00000117155;ENSG00000117650;ENSG00000118762;ENSG00000119541;ENSG00000126001;ENSG00000129810;ENSG00000131351…
GO:0034504	protein localization to nucleus	http://amigo.geneontology.org/amigo/term/GO:0034504	-0.399563	-1.9033	0	0.00956102	215	73	ENSG00000006712;ENSG00000025800;ENSG00000047410;ENSG00000064102;ENSG00000064419;ENSG00000065150;ENSG00000067066;ENSG00000069248;ENSG00000082898;ENSG00000083312;ENSG00000086200;ENSG00000086589;ENSG00000088888;ENSG00000091039;ENSG00000093000;ENSG00000095319;ENSG00000096384;ENSG00000096717;ENSG00000096968;ENSG00000102753;ENSG00000102900;ENSG00000104517;ENSG00000108424;ENSG00000108559;ENSG00000111581…
GO:0051653	spindle localization	http://amigo.geneontology.org/amigo/term/GO:0051653	-0.535893	-1.89777	0.00104767	0.0099131	37	15	ENSG00000007168;ENSG00000040275;ENSG00000066279;ENSG00000080986;ENSG00000086827;ENSG00000106299;ENSG00000108424;ENSG00000115091;ENSG00000136861;ENSG00000137804;ENSG00000138071;ENSG00000147316;ENSG00000197386;ENSG00000204843;ENSG00000215114
GO:0006354	DNA-templated transcription, elongation	http://amigo.geneontology.org/amigo/term/GO:0006354	-0.450985	-1.89368	0	0.0100083	90	36	ENSG00000006712;ENSG00000011007;ENSG00000015171;ENSG00000020426;ENSG00000047315;ENSG00000060069;ENSG00000072364;ENSG00000079134;ENSG00000090061;ENSG00000092201;ENSG00000102241;ENSG00000104884;ENSG00000106462;ENSG00000109111;ENSG00000109911;ENSG00000110768;ENSG00000112130;ENSG00000118985;ENSG00000129518;ENSG00000134014;ENSG00000134371;ENSG00000134759;ENSG00000136937;ENSG00000137815;ENSG00000149136…
GO:1902115	regulation of organelle assembly	http://amigo.geneontology.org/amigo/term/GO:1902115	-0.407075	-1.88835	0	0.0102519	174	73	ENSG00000008086;ENSG00000011454;ENSG00000012048;ENSG00000032742;ENSG00000047410;ENSG00000047849;ENSG00000050327;ENSG00000054654;ENSG00000065491;ENSG00000065882;ENSG00000067208;ENSG00000072501;ENSG00000076382;ENSG00000079805;ENSG00000081189;ENSG00000083799;ENSG00000092108;ENSG00000101624;ENSG00000101972;ENSG00000103540;ENSG00000108055;ENSG00000108395;ENSG00000111554;ENSG00000111596;ENSG00000112701…
GO:0043648	dicarboxylic acid metabolic process	http://amigo.geneontology.org/amigo/term/GO:0043648	-0.455928	-1.88777	0	0.00990958	82	31	ENSG00000001084;ENSG00000012504;ENSG00000014641;ENSG00000035687;ENSG00000059573;ENSG00000065154;ENSG00000065833;ENSG00000073578;ENSG00000080819;ENSG00000082212;ENSG00000087299;ENSG00000091140;ENSG00000091483;ENSG00000100714;ENSG00000107537;ENSG00000115419;ENSG00000119689;ENSG00000120053;ENSG00000125166;ENSG00000135821;ENSG00000136010;ENSG00000136143;ENSG00000138363;ENSG00000138413;ENSG00000146281…
GO:0007018	microtubule-based movement	http://amigo.geneontology.org/amigo/term/GO:0007018	-0.399955	-1.88667	0	0.00970067	200	70	ENSG00000007168;ENSG00000032742;ENSG00000041353;ENSG00000054523;ENSG00000068796;ENSG00000077380;ENSG00000078674;ENSG00000079616;ENSG00000083312;ENSG00000089177;ENSG00000090889;ENSG00000096872;ENSG00000100644;ENSG00000100815;ENSG00000101350;ENSG00000103351;ENSG00000104133;ENSG00000104164;ENSG00000105948;ENSG00000107863;ENSG00000108424;ENSG00000109971;ENSG00000112144;ENSG00000113971;ENSG00000114841…
GO:0030865	cortical cytoskeleton organization	http://amigo.geneontology.org/amigo/term/GO:0030865	-0.52941	-1.88098	0.000524384	0.0100272	37	16	ENSG00000007168;ENSG00000061676;ENSG00000067900;ENSG00000071127;ENSG00000075711;ENSG00000079819;ENSG00000106299;ENSG00000114346;ENSG00000120756;ENSG00000134318;ENSG00000143093;ENSG00000157827;ENSG00000159023;ENSG00000161800;ENSG00000170248;ENSG00000179218
GO:0044772	mitotic cell cycle phase transition	http://amigo.geneontology.org/amigo/term/GO:0044772	-0.362797	-1.86572	0	0.0117006	445	149	ENSG00000004897;ENSG00000005483;ENSG00000006611;ENSG00000007168;ENSG00000010244;ENSG00000013810;ENSG00000020426;ENSG00000020922;ENSG00000036257;ENSG00000040275;ENSG00000047410;ENSG00000053254;ENSG00000053900;ENSG00000054282;ENSG00000055130;ENSG00000057935;ENSG00000058729;ENSG00000060069;ENSG00000060982;ENSG00000064313;ENSG00000065328;ENSG00000072571;ENSG00000076003;ENSG00000077380;ENSG00000077684…
GO:0016569	covalent chromatin modification	http://amigo.geneontology.org/amigo/term/GO:0016569	-0.366309	-1.86285	0	0.0116811	395	131	ENSG00000004487;ENSG00000005483;ENSG00000006459;ENSG00000006712;ENSG00000008083;ENSG00000009954;ENSG00000011243;ENSG00000012504;ENSG00000032219;ENSG00000043143;ENSG00000048649;ENSG00000054267;ENSG00000057935;ENSG00000066135;ENSG00000066427;ENSG00000073614;ENSG00000075856;ENSG00000076108;ENSG00000077684;ENSG00000080345;ENSG00000082068;ENSG00000083168;ENSG00000084073;ENSG00000084093;ENSG00000084676…
GO:0051052	regulation of DNA metabolic process	http://amigo.geneontology.org/amigo/term/GO:0051052	-0.370563	-1.85836	0	0.0119533	338	126	ENSG00000004487;ENSG00000005156;ENSG00000012048;ENSG00000020922;ENSG00000051341;ENSG00000062650;ENSG00000067369;ENSG00000072274;ENSG00000072501;ENSG00000073050;ENSG00000076242;ENSG00000079134;ENSG00000079246;ENSG00000080345;ENSG00000080824;ENSG00000081237;ENSG00000082068;ENSG00000084073;ENSG00000085224;ENSG00000085511;ENSG00000095002;ENSG00000096384;ENSG00000096717;ENSG00000100462;ENSG00000101596…
GO:0008334	histone mRNA metabolic process	http://amigo.geneontology.org/amigo/term/GO:0008334	-0.557162	-1.85405	0.00215247	0.0121963	29	9	ENSG00000083223;ENSG00000107951;ENSG00000119203;ENSG00000134744;ENSG00000136937;ENSG00000138385;ENSG00000149311;ENSG00000165934;ENSG00000171824
GO:0022406	membrane docking	http://amigo.geneontology.org/amigo/term/GO:0022406	-0.402198	-1.84693	0	0.0128514	161	63	ENSG00000007168;ENSG00000054282;ENSG00000067715;ENSG00000067900;ENSG00000070367;ENSG00000073969;ENSG00000077380;ENSG00000078674;ENSG00000080824;ENSG00000090339;ENSG00000092108;ENSG00000101624;ENSG00000101639;ENSG00000103540;ENSG00000103995;ENSG00000104164;ENSG00000104833;ENSG00000105568;ENSG00000110274;ENSG00000112685;ENSG00000114107;ENSG00000116127;ENSG00000116266;ENSG00000117650;ENSG00000117868…
GO:0035459	cargo loading into vesicle	http://amigo.geneontology.org/amigo/term/GO:0035459	-0.62547	-1.84207	0.00270807	0.0131771	18	8	ENSG00000073921;ENSG00000100934;ENSG00000101310;ENSG00000113615;ENSG00000137177;ENSG00000138674;ENSG00000150961;ENSG00000154305
GO:0008380	RNA splicing	http://amigo.geneontology.org/amigo/term/GO:0008380	-0.361445	-1.82832	0	0.0149929	381	98	ENSG00000004487;ENSG00000011243;ENSG00000021776;ENSG00000047315;ENSG00000060339;ENSG00000061936;ENSG00000064703;ENSG00000068394;ENSG00000075856;ENSG00000076650;ENSG00000079134;ENSG00000079785;ENSG00000082516;ENSG00000084093;ENSG00000084463;ENSG00000087365;ENSG00000089682;ENSG00000096063;ENSG00000096401;ENSG00000099783;ENSG00000099995;ENSG00000100220;ENSG00000100462;ENSG00000100603;ENSG00000101343…
GO:0051321	meiotic cell cycle	http://amigo.geneontology.org/amigo/term/GO:0051321	-0.399369	-1.82706	0	0.0148101	158	63	ENSG00000010292;ENSG00000020922;ENSG00000037474;ENSG00000062650;ENSG00000066279;ENSG00000072501;ENSG00000076242;ENSG00000077097;ENSG00000085224;ENSG00000086827;ENSG00000101773;ENSG00000101972;ENSG00000104320;ENSG00000105568;ENSG00000108055;ENSG00000108946;ENSG00000112742;ENSG00000113318;ENSG00000113522;ENSG00000113810;ENSG00000115091;ENSG00000117650;ENSG00000120539;ENSG00000121152;ENSG00000121621…
GO:0031122	cytoplasmic microtubule organization	http://amigo.geneontology.org/amigo/term/GO:0031122	-0.491364	-1.82593	0.000873973	0.0145466	47	26	ENSG00000007168;ENSG00000021574;ENSG00000065613;ENSG00000074054;ENSG00000075711;ENSG00000078674;ENSG00000092820;ENSG00000102781;ENSG00000108424;ENSG00000109171;ENSG00000110318;ENSG00000115355;ENSG00000118200;ENSG00000126216;ENSG00000130559;ENSG00000130640;ENSG00000134709;ENSG00000137497;ENSG00000137822;ENSG00000151914;ENSG00000168172;ENSG00000168944;ENSG00000182263;ENSG00000186625;ENSG00000212916…
GO:0044380	protein localization to cytoskeleton	http://amigo.geneontology.org/amigo/term/GO:0044380	-0.480715	-1.82165	0.000515641	0.0148207	52	20	ENSG00000076382;ENSG00000078674;ENSG00000083535;ENSG00000101447;ENSG00000112742;ENSG00000126001;ENSG00000128881;ENSG00000131504;ENSG00000134982;ENSG00000137497;ENSG00000138182;ENSG00000140463;ENSG00000147316;ENSG00000153187;ENSG00000162413;ENSG00000168172;ENSG00000173230;ENSG00000173588;ENSG00000198824;ENSG00000215114
GO:0044782	cilium organization	http://amigo.geneontology.org/amigo/term/GO:0044782	-0.364994	-1.82125	0	0.0144817	320	111	ENSG00000007168;ENSG00000011454;ENSG00000032742;ENSG00000052841;ENSG00000054282;ENSG00000065491;ENSG00000067208;ENSG00000070367;ENSG00000075945;ENSG00000077380;ENSG00000078674;ENSG00000079805;ENSG00000080298;ENSG00000080824;ENSG00000083312;ENSG00000083535;ENSG00000083799;ENSG00000096872;ENSG00000100578;ENSG00000100815;ENSG00000101350;ENSG00000101624;ENSG00000103351;ENSG00000103540;ENSG00000103995…
GO:0048285	organelle fission	http://amigo.geneontology.org/amigo/term/GO:0048285	-0.361383	-1.82083	0	0.0141817	355	127	ENSG00000004897;ENSG00000010244;ENSG00000010292;ENSG00000011243;ENSG00000013810;ENSG00000020922;ENSG00000036257;ENSG00000040275;ENSG00000047410;ENSG00000053900;ENSG00000058729;ENSG00000060069;ENSG00000062650;ENSG00000066279;ENSG00000068796;ENSG00000069329;ENSG00000072501;ENSG00000076242;ENSG00000076382;ENSG00000077097;ENSG00000079616;ENSG00000080986;ENSG00000083535;ENSG00000083642;ENSG00000085224…
GO:0050000	chromosome localization	http://amigo.geneontology.org/amigo/term/GO:0050000	-0.456745	-1.81435	0.000166973	0.0148468	67	29	ENSG00000031691;ENSG00000036257;ENSG00000040275;ENSG00000076242;ENSG00000076382;ENSG00000079616;ENSG00000080986;ENSG00000083535;ENSG00000086827;ENSG00000094880;ENSG00000101447;ENSG00000108424;ENSG00000115091;ENSG00000117724;ENSG00000118193;ENSG00000119541;ENSG00000121621;ENSG00000126787;ENSG00000134057;ENSG00000137497;ENSG00000138071;ENSG00000138180;ENSG00000138778;ENSG00000143228;ENSG00000147601…
GO:0060249	anatomical structure homeostasis	http://amigo.geneontology.org/amigo/term/GO:0060249	-0.366525	-1.80947	0	0.0153053	284	97	ENSG00000005893;ENSG00000006210;ENSG00000006611;ENSG00000007062;ENSG00000020922;ENSG00000035928;ENSG00000067066;ENSG00000070367;ENSG00000070961;ENSG00000072274;ENSG00000073050;ENSG00000077514;ENSG00000079246;ENSG00000080345;ENSG00000080824;ENSG00000085224;ENSG00000085511;ENSG00000087274;ENSG00000091483;ENSG00000091513;ENSG00000096384;ENSG00000100644;ENSG00000101868;ENSG00000102144;ENSG00000104320…
GO:0071166	ribonucleoprotein complex localization	http://amigo.geneontology.org/amigo/term/GO:0071166	-0.40879	-1.80923	0.000160875	0.0149697	122	40	ENSG00000011243;ENSG00000047410;ENSG00000058729;ENSG00000069248;ENSG00000079134;ENSG00000082898;ENSG00000093000;ENSG00000095319;ENSG00000102900;ENSG00000108559;ENSG00000109111;ENSG00000111581;ENSG00000116698;ENSG00000116754;ENSG00000119203;ENSG00000119392;ENSG00000125351;ENSG00000125450;ENSG00000125676;ENSG00000125755;ENSG00000133226;ENSG00000135521;ENSG00000136709;ENSG00000136937;ENSG00000138385…
GO:0031032	actomyosin structure organization	http://amigo.geneontology.org/amigo/term/GO:0031032	-0.408418	-1.80524	0.000158328	0.0153393	123	53	ENSG00000036257;ENSG00000050327;ENSG00000064042;ENSG00000067900;ENSG00000068305;ENSG00000071127;ENSG00000079819;ENSG00000081189;ENSG00000092439;ENSG00000095203;ENSG00000095637;ENSG00000099250;ENSG00000101605;ENSG00000105976;ENSG00000108946;ENSG00000109063;ENSG00000114346;ENSG00000115109;ENSG00000116127;ENSG00000117707;ENSG00000131626;ENSG00000133026;ENSG00000134318;ENSG00000134775;ENSG00000134853…
GO:0043087	regulation of GTPase activity	http://amigo.geneontology.org/amigo/term/GO:0043087	-0.36031	-1.8029	0	0.015406	329	119	ENSG00000003393;ENSG00000004399;ENSG00000006210;ENSG00000007168;ENSG00000008086;ENSG00000011454;ENSG00000017797;ENSG00000024526;ENSG00000029725;ENSG00000050327;ENSG00000057608;ENSG00000060237;ENSG00000065150;ENSG00000065491;ENSG00000066777;ENSG00000066933;ENSG00000067208;ENSG00000071054;ENSG00000071189;ENSG00000073921;ENSG00000075391;ENSG00000076356;ENSG00000087470;ENSG00000088387;ENSG00000090339…
GO:0070741	response to interleukin-6	http://amigo.geneontology.org/amigo/term/GO:0070741	-0.55343	-1.79582	0.00340441	0.0163169	26	15	ENSG00000090339;ENSG00000096968;ENSG00000109320;ENSG00000110395;ENSG00000115415;ENSG00000124212;ENSG00000134352;ENSG00000141646;ENSG00000151422;ENSG00000153823;ENSG00000162434;ENSG00000171557;ENSG00000175354;ENSG00000179295;ENSG00000198730
GO:1901987	regulation of cell cycle phase transition	http://amigo.geneontology.org/amigo/term/GO:1901987	-0.356532	-1.79174	0	0.0166936	347	124	ENSG00000004897;ENSG00000005483;ENSG00000006712;ENSG00000007168;ENSG00000010244;ENSG00000012048;ENSG00000020922;ENSG00000036257;ENSG00000040275;ENSG00000047410;ENSG00000053254;ENSG00000053900;ENSG00000054282;ENSG00000055130;ENSG00000057935;ENSG00000058668;ENSG00000058729;ENSG00000072571;ENSG00000077380;ENSG00000077684;ENSG00000078674;ENSG00000080824;ENSG00000080839;ENSG00000080986;ENSG00000086827…
GO:0007492	endoderm development	http://amigo.geneontology.org/amigo/term/GO:0007492	-0.486836	-1.79121	0.00155199	0.0164492	45	15	ENSG00000006712;ENSG00000060718;ENSG00000089177;ENSG00000091136;ENSG00000115109;ENSG00000116478;ENSG00000134371;ENSG00000135862;ENSG00000137815;ENSG00000141646;ENSG00000157227;ENSG00000161638;ENSG00000166477;ENSG00000171634;ENSG00000181555
GO:0098781	ncRNA transcription	http://amigo.geneontology.org/amigo/term/GO:0098781	-0.418593	-1.79121	0.000326158	0.0161065	98	29	ENSG00000047315;ENSG00000064102;ENSG00000077235;ENSG00000090061;ENSG00000108506;ENSG00000115053;ENSG00000115750;ENSG00000117877;ENSG00000118985;ENSG00000119041;ENSG00000122484;ENSG00000125484;ENSG00000125630;ENSG00000127616;ENSG00000128915;ENSG00000130935;ENSG00000136937;ENSG00000137947;ENSG00000143493;ENSG00000143624;ENSG00000144161;ENSG00000148835;ENSG00000153767;ENSG00000164151;ENSG00000164902…
GO:0008214	protein dealkylation	http://amigo.geneontology.org/amigo/term/GO:0008214	-0.542175	-1.79025	0.00359195	0.0159383	28	20	ENSG00000004487;ENSG00000006459;ENSG00000008083;ENSG00000066135;ENSG00000073614;ENSG00000107077;ENSG00000115548;ENSG00000117139;ENSG00000120733;ENSG00000126012;ENSG00000127663;ENSG00000147050;ENSG00000150347;ENSG00000165097;ENSG00000170468;ENSG00000171988;ENSG00000172943;ENSG00000173120;ENSG00000197724;ENSG00000214517
GO:0015931	nucleobase-containing compound transport	http://amigo.geneontology.org/amigo/term/GO:0015931	-0.373039	-1.77439	0	0.0186016	210	67	ENSG00000011243;ENSG00000047410;ENSG00000058729;ENSG00000069248;ENSG00000073792;ENSG00000074356;ENSG00000079134;ENSG00000082898;ENSG00000085491;ENSG00000091009;ENSG00000093000;ENSG00000095319;ENSG00000102900;ENSG00000108559;ENSG00000109111;ENSG00000111581;ENSG00000111605;ENSG00000113569;ENSG00000116560;ENSG00000116698;ENSG00000116754;ENSG00000119203;ENSG00000119392;ENSG00000121774;ENSG00000125351…
GO:0030705	cytoskeleton-dependent intracellular transport	http://amigo.geneontology.org/amigo/term/GO:0030705	-0.386843	-1.75939	0	0.0213337	149	51	ENSG00000007168;ENSG00000032742;ENSG00000041353;ENSG00000054523;ENSG00000078674;ENSG00000083312;ENSG00000090889;ENSG00000096872;ENSG00000100644;ENSG00000100815;ENSG00000101350;ENSG00000103351;ENSG00000104133;ENSG00000104164;ENSG00000105948;ENSG00000106299;ENSG00000107863;ENSG00000109971;ENSG00000112144;ENSG00000115355;ENSG00000116560;ENSG00000117155;ENSG00000123607;ENSG00000126858;ENSG00000126870…
GO:2000273	positive regulation of signaling receptor activity	http://amigo.geneontology.org/amigo/term/GO:2000273	-0.579724	-1.75711	0.00439883	0.0214634	20	7	ENSG00000124151;ENSG00000125686;ENSG00000142192;ENSG00000146918;ENSG00000147133;ENSG00000150093;ENSG00000151694
GO:0022613	ribonucleoprotein complex biogenesis	http://amigo.geneontology.org/amigo/term/GO:0022613	-0.34354	-1.75537	0	0.0214718	419	148	ENSG00000001497;ENSG00000011260;ENSG00000039123;ENSG00000058729;ENSG00000061936;ENSG00000063046;ENSG00000064703;ENSG00000065183;ENSG00000066654;ENSG00000067533;ENSG00000073536;ENSG00000075856;ENSG00000079785;ENSG00000080824;ENSG00000082516;ENSG00000082898;ENSG00000083520;ENSG00000083635;ENSG00000084463;ENSG00000085721;ENSG00000086589;ENSG00000087263;ENSG00000087269;ENSG00000088930;ENSG00000089048…
GO:0006260	DNA replication	http://amigo.geneontology.org/amigo/term/GO:0006260	-0.360865	-1.74885	0	0.0224525	246	81	ENSG00000005156;ENSG00000009413;ENSG00000020922;ENSG00000035928;ENSG00000038219;ENSG00000048392;ENSG00000051341;ENSG00000062650;ENSG00000065328;ENSG00000072501;ENSG00000076003;ENSG00000077514;ENSG00000079134;ENSG00000084073;ENSG00000085224;ENSG00000092201;ENSG00000092853;ENSG00000100297;ENSG00000100479;ENSG00000101347;ENSG00000101773;ENSG00000101868;ENSG00000101972;ENSG00000104320;ENSG00000104738…
GO:0006302	double-strand break repair	http://amigo.geneontology.org/amigo/term/GO:0006302	-0.369842	-1.742	0	0.0236748	196	75	ENSG00000004487;ENSG00000005156;ENSG00000012048;ENSG00000020922;ENSG00000051341;ENSG00000067369;ENSG00000072121;ENSG00000073050;ENSG00000076242;ENSG00000079246;ENSG00000079785;ENSG00000080345;ENSG00000082068;ENSG00000095002;ENSG00000100811;ENSG00000101347;ENSG00000101596;ENSG00000101773;ENSG00000101868;ENSG00000104320;ENSG00000104517;ENSG00000107290;ENSG00000109685;ENSG00000110107;ENSG00000111247…
GO:0061842	microtubule organizing center localization	http://amigo.geneontology.org/amigo/term/GO:0061842	-0.538349	-1.73929	0.00595023	0.023855	25	15	ENSG00000007168;ENSG00000054654;ENSG00000064102;ENSG00000066279;ENSG00000075711;ENSG00000076356;ENSG00000087586;ENSG00000092820;ENSG00000100242;ENSG00000100503;ENSG00000127914;ENSG00000153201;ENSG00000164828;ENSG00000170759;ENSG00000185963
GO:0048193	Golgi vesicle transport	http://amigo.geneontology.org/amigo/term/GO:0048193	-0.348976	-1.7392	0	0.0234492	318	119	ENSG00000021574;ENSG00000028528;ENSG00000029725;ENSG00000036257;ENSG00000047932;ENSG00000054793;ENSG00000061987;ENSG00000065000;ENSG00000066455;ENSG00000068796;ENSG00000070367;ENSG00000073969;ENSG00000074695;ENSG00000075945;ENSG00000077380;ENSG00000079616;ENSG00000079805;ENSG00000085365;ENSG00000085832;ENSG00000086827;ENSG00000087502;ENSG00000089177;ENSG00000090889;ENSG00000090989;ENSG00000092108…
GO:0031123	RNA 3'-end processing	http://amigo.geneontology.org/amigo/term/GO:0031123	-0.390752	-1.73487	0.000473934	0.0239735	128	40	ENSG00000006712;ENSG00000006744;ENSG00000079134;ENSG00000083223;ENSG00000100722;ENSG00000101811;ENSG00000103549;ENSG00000107951;ENSG00000111605;ENSG00000116754;ENSG00000119203;ENSG00000125351;ENSG00000125676;ENSG00000125755;ENSG00000130826;ENSG00000133226;ENSG00000134057;ENSG00000134371;ENSG00000134744;ENSG00000136709;ENSG00000136937;ENSG00000138035;ENSG00000138385;ENSG00000140694;ENSG00000140829…
GO:0007292	female gamete generation	http://amigo.geneontology.org/amigo/term/GO:0007292	-0.421922	-1.72943	0.00133467	0.0248185	78	23	ENSG00000049860;ENSG00000064703;ENSG00000066279;ENSG00000083223;ENSG00000096717;ENSG00000105568;ENSG00000112742;ENSG00000115904;ENSG00000120539;ENSG00000121152;ENSG00000124486;ENSG00000125885;ENSG00000131747;ENSG00000134057;ENSG00000134744;ENSG00000139618;ENSG00000140694;ENSG00000164961;ENSG00000166783;ENSG00000166851;ENSG00000167548;ENSG00000172572;ENSG00000196074
GO:0032886	regulation of microtubule-based process	http://amigo.geneontology.org/amigo/term/GO:0032886	-0.37498	-1.72824	0	0.0247094	166	65	ENSG00000004478;ENSG00000007168;ENSG00000012048;ENSG00000013810;ENSG00000047410;ENSG00000072501;ENSG00000076382;ENSG00000082898;ENSG00000083799;ENSG00000100503;ENSG00000101624;ENSG00000101972;ENSG00000104833;ENSG00000105976;ENSG00000108055;ENSG00000108395;ENSG00000109171;ENSG00000112701;ENSG00000114107;ENSG00000117650;ENSG00000118007;ENSG00000118200;ENSG00000119541;ENSG00000121621;ENSG00000125124…
GO:0006360	transcription by RNA polymerase I	http://amigo.geneontology.org/amigo/term/GO:0006360	-0.445261	-1.72453	0.0020562	0.0251614	59	26	ENSG00000020426;ENSG00000076108;ENSG00000084073;ENSG00000085721;ENSG00000104884;ENSG00000105849;ENSG00000108312;ENSG00000110768;ENSG00000115053;ENSG00000115368;ENSG00000115750;ENSG00000117877;ENSG00000119285;ENSG00000125482;ENSG00000125630;ENSG00000125686;ENSG00000127616;ENSG00000130935;ENSG00000136045;ENSG00000147133;ENSG00000163811;ENSG00000164338;ENSG00000166986;ENSG00000172071;ENSG00000172943…
GO:0007272	ensheathment of neurons	http://amigo.geneontology.org/amigo/term/GO:0007272	-0.420754	-1.72107	0.00115226	0.0255735	76	27	ENSG00000049860;ENSG00000064787;ENSG00000072415;ENSG00000075711;ENSG00000087053;ENSG00000088812;ENSG00000100697;ENSG00000104884;ENSG00000112367;ENSG00000112414;ENSG00000115020;ENSG00000116906;ENSG00000118193;ENSG00000120885;ENSG00000133812;ENSG00000141385;ENSG00000145191;ENSG00000148498;ENSG00000164300;ENSG00000165699;ENSG00000172071;ENSG00000172466;ENSG00000173402;ENSG00000174607;ENSG00000196712…
GO:0042303	molting cycle	http://amigo.geneontology.org/amigo/term/GO:0042303	-0.433954	-1.71924	0.00169924	0.0256382	64	25	ENSG00000006607;ENSG00000037474;ENSG00000084073;ENSG00000100991;ENSG00000104884;ENSG00000115904;ENSG00000116478;ENSG00000120370;ENSG00000133794;ENSG00000134569;ENSG00000134852;ENSG00000135503;ENSG00000137497;ENSG00000141646;ENSG00000146648;ENSG00000146909;ENSG00000151748;ENSG00000162601;ENSG00000164066;ENSG00000164190;ENSG00000165240;ENSG00000168214;ENSG00000196591;ENSG00000196712;ENSG00000197535
GO:0051656	establishment of organelle localization	http://amigo.geneontology.org/amigo/term/GO:0051656	-0.339078	-1.71437	0	0.0264403	373	130	ENSG00000007168;ENSG00000031691;ENSG00000033327;ENSG00000034053;ENSG00000036054;ENSG00000036257;ENSG00000040275;ENSG00000041353;ENSG00000054523;ENSG00000058729;ENSG00000065000;ENSG00000067715;ENSG00000068400;ENSG00000073969;ENSG00000074695;ENSG00000075711;ENSG00000075945;ENSG00000076242;ENSG00000076382;ENSG00000078674;ENSG00000079616;ENSG00000079805;ENSG00000080986;ENSG00000081803;ENSG00000082898…
GO:0098727	maintenance of cell number	http://amigo.geneontology.org/amigo/term/GO:0098727	-0.394448	-1.70756	0.000161394	0.0279271	106	37	ENSG00000006712;ENSG00000066279;ENSG00000072501;ENSG00000078674;ENSG00000080345;ENSG00000101882;ENSG00000106462;ENSG00000107077;ENSG00000108055;ENSG00000111596;ENSG00000117713;ENSG00000123200;ENSG00000124151;ENSG00000125107;ENSG00000134371;ENSG00000134744;ENSG00000137693;ENSG00000137815;ENSG00000138336;ENSG00000139842;ENSG00000141380;ENSG00000141646;ENSG00000143033;ENSG00000144554;ENSG00000145388…
GO:0051169	nuclear transport	http://amigo.geneontology.org/amigo/term/GO:0051169	-0.34317	-1.70217	0	0.0290351	302	78	ENSG00000011243;ENSG00000025800;ENSG00000041802;ENSG00000047410;ENSG00000058272;ENSG00000058729;ENSG00000064419;ENSG00000064703;ENSG00000065150;ENSG00000067066;ENSG00000069248;ENSG00000069869;ENSG00000079134;ENSG00000082516;ENSG00000082898;ENSG00000083312;ENSG00000086200;ENSG00000091009;ENSG00000093000;ENSG00000095319;ENSG00000096384;ENSG00000096717;ENSG00000096968;ENSG00000102753;ENSG00000102900…
GO:0010171	body morphogenesis	http://amigo.geneontology.org/amigo/term/GO:0010171	-0.483404	-1.69967	0.00435768	0.0293081	36	12	ENSG00000070018;ENSG00000109063;ENSG00000115839;ENSG00000144824;ENSG00000147257;ENSG00000150347;ENSG00000157764;ENSG00000163539;ENSG00000163659;ENSG00000164190;ENSG00000167522;ENSG00000173402
GO:0007369	gastrulation	http://amigo.geneontology.org/amigo/term/GO:0007369	-0.387636	-1.69242	0.000321337	0.0309737	111	34	ENSG00000006712;ENSG00000036257;ENSG00000060237;ENSG00000060718;ENSG00000070018;ENSG00000089177;ENSG00000091136;ENSG00000091140;ENSG00000105220;ENSG00000105429;ENSG00000108946;ENSG00000109814;ENSG00000113971;ENSG00000115109;ENSG00000115170;ENSG00000117713;ENSG00000126016;ENSG00000131558;ENSG00000134371;ENSG00000137815;ENSG00000141646;ENSG00000144824;ENSG00000147050;ENSG00000147257;ENSG00000150093…
GO:0000959	mitochondrial RNA metabolic process	http://amigo.geneontology.org/amigo/term/GO:0000959	-0.469966	-1.68822	0.00469484	0.0318034	41	27	ENSG00000006744;ENSG00000043514;ENSG00000072756;ENSG00000100890;ENSG00000103356;ENSG00000106105;ENSG00000107815;ENSG00000108064;ENSG00000117593;ENSG00000118689;ENSG00000122085;ENSG00000126814;ENSG00000127989;ENSG00000132356;ENSG00000135297;ENSG00000138035;ENSG00000138095;ENSG00000138399;ENSG00000139131;ENSG00000143374;ENSG00000155846;ENSG00000156469;ENSG00000156502;ENSG00000162851;ENSG00000171103…
GO:0001764	neuron migration	http://amigo.geneontology.org/amigo/term/GO:0001764	-0.40216	-1.68527	0.00178398	0.0322499	85	33	ENSG00000006210;ENSG00000007168;ENSG00000008086;ENSG00000054282;ENSG00000066279;ENSG00000075213;ENSG00000077097;ENSG00000078674;ENSG00000081189;ENSG00000091129;ENSG00000092421;ENSG00000099250;ENSG00000109756;ENSG00000124486;ENSG00000131711;ENSG00000132561;ENSG00000133026;ENSG00000134014;ENSG00000136848;ENSG00000137055;ENSG00000137285;ENSG00000138182;ENSG00000140463;ENSG00000150471;ENSG00000162928…
GO:0016072	rRNA metabolic process	http://amigo.geneontology.org/amigo/term/GO:0016072	-0.348388	-1.67623	0	0.0346219	230	62	ENSG00000001497;ENSG00000011260;ENSG00000058729;ENSG00000065183;ENSG00000066654;ENSG00000077235;ENSG00000083520;ENSG00000084463;ENSG00000087269;ENSG00000088930;ENSG00000089048;ENSG00000096717;ENSG00000100029;ENSG00000107937;ENSG00000108592;ENSG00000108651;ENSG00000115053;ENSG00000115368;ENSG00000115750;ENSG00000115761;ENSG00000117174;ENSG00000117597;ENSG00000117877;ENSG00000120800;ENSG00000124228…
GO:0006338	chromatin remodeling	http://amigo.geneontology.org/amigo/term/GO:0006338	-0.372295	-1.6693	0.000781128	0.0364522	133	45	ENSG00000009954;ENSG00000031691;ENSG00000047410;ENSG00000048649;ENSG00000068878;ENSG00000075089;ENSG00000076108;ENSG00000080503;ENSG00000085224;ENSG00000099954;ENSG00000100888;ENSG00000101596;ENSG00000102038;ENSG00000109111;ENSG00000111642;ENSG00000112130;ENSG00000116478;ENSG00000117713;ENSG00000119969;ENSG00000123485;ENSG00000123636;ENSG00000127616;ENSG00000128908;ENSG00000131778;ENSG00000132780…
GO:0070988	demethylation	http://amigo.geneontology.org/amigo/term/GO:0070988	-0.444218	-1.6597	0.00507082	0.0391891	49	30	ENSG00000004487;ENSG00000006459;ENSG00000008083;ENSG00000066135;ENSG00000073614;ENSG00000100601;ENSG00000107077;ENSG00000115548;ENSG00000117139;ENSG00000120733;ENSG00000124486;ENSG00000126012;ENSG00000127663;ENSG00000127948;ENSG00000138109;ENSG00000138336;ENSG00000140718;ENSG00000147050;ENSG00000150347;ENSG00000164164;ENSG00000165097;ENSG00000168769;ENSG00000170468;ENSG00000171988;ENSG00000172943…
GO:0000726	non-recombinational repair	http://amigo.geneontology.org/amigo/term/GO:0000726	-0.40714	-1.65786	0.00232481	0.0393513	75	39	ENSG00000005156;ENSG00000012048;ENSG00000020922;ENSG00000051341;ENSG00000067369;ENSG00000073050;ENSG00000076242;ENSG00000079246;ENSG00000080345;ENSG00000087206;ENSG00000101596;ENSG00000101773;ENSG00000101868;ENSG00000104320;ENSG00000109685;ENSG00000110107;ENSG00000112130;ENSG00000113522;ENSG00000116030;ENSG00000122376;ENSG00000127423;ENSG00000134758;ENSG00000137337;ENSG00000138071;ENSG00000149311…
GO:0016482	cytosolic transport	http://amigo.geneontology.org/amigo/term/GO:0016482	-0.365334	-1.65402	0.000624512	0.040187	139	58	ENSG00000004766;ENSG00000008294;ENSG00000028528;ENSG00000036054;ENSG00000054523;ENSG00000061987;ENSG00000067208;ENSG00000069329;ENSG00000074695;ENSG00000078142;ENSG00000082805;ENSG00000085832;ENSG00000087053;ENSG00000089177;ENSG00000099290;ENSG00000102189;ENSG00000102805;ENSG00000103978;ENSG00000105875;ENSG00000107036;ENSG00000108587;ENSG00000115020;ENSG00000122958;ENSG00000123106;ENSG00000123595…
GO:0006399	tRNA metabolic process	http://amigo.geneontology.org/amigo/term/GO:0006399	-0.354421	-1.64726	0.000458225	0.0421631	178	63	ENSG00000006744;ENSG00000011376;ENSG00000031698;ENSG00000037474;ENSG00000043514;ENSG00000059588;ENSG00000059691;ENSG00000065427;ENSG00000066651;ENSG00000066654;ENSG00000067704;ENSG00000077235;ENSG00000079785;ENSG00000087995;ENSG00000089195;ENSG00000091127;ENSG00000100220;ENSG00000100890;ENSG00000101557;ENSG00000103356;ENSG00000106105;ENSG00000107614;ENSG00000109618;ENSG00000109911;ENSG00000110619…
GO:0072347	response to anesthetic	http://amigo.geneontology.org/amigo/term/GO:0072347	-0.459121	-1.63014	0.0126471	0.0487167	37	10	ENSG00000079805;ENSG00000096384;ENSG00000105220;ENSG00000108883;ENSG00000125166;ENSG00000135679;ENSG00000144381;ENSG00000183044;ENSG00000196591;ENSG00000197548
GO:0048645	animal organ formation	http://amigo.geneontology.org/amigo/term/GO:0048645	0.49722	1.79569	0.00412844	0.0423278	33	11	ENSG00000016082;ENSG00000077782;ENSG00000082014;ENSG00000102882;ENSG00000109705;ENSG00000114315;ENSG00000123388;ENSG00000125378;ENSG00000164056;ENSG00000164442;ENSG00000164690
GO:1901264	carbohydrate derivative transport	http://amigo.geneontology.org/amigo/term/GO:1901264	0.443574	1.81778	0.000241138	0.0383998	58	21	ENSG00000005022;ENSG00000051523;ENSG00000080189;ENSG00000102100;ENSG00000112337;ENSG00000112759;ENSG00000119655;ENSG00000121073;ENSG00000125454;ENSG00000137700;ENSG00000141349;ENSG00000151729;ENSG00000157800;ENSG00000169100;ENSG00000169562;ENSG00000174669;ENSG00000181035;ENSG00000181830;ENSG00000196839;ENSG00000220205;ENSG00000224051
GO:0043094	cellular metabolic compound salvage	http://amigo.geneontology.org/amigo/term/GO:0043094	0.554417	1.94252	0.000224366	0.0112117	29	15	ENSG00000037757;ENSG00000099256;ENSG00000111906;ENSG00000116337;ENSG00000147813;ENSG00000149089;ENSG00000160209;ENSG00000165704;ENSG00000166548;ENSG00000167900;ENSG00000183696;ENSG00000196839;ENSG00000198276;ENSG00000198805;ENSG00000198931
GO:0006401	RNA catabolic process	http://amigo.geneontology.org/amigo/term/GO:0006401	0.403285	2.14326	0	0.000954928	310	77	ENSG00000008988;ENSG00000026297;ENSG00000060138;ENSG00000063177;ENSG00000065978;ENSG00000071082;ENSG00000077348;ENSG00000083845;ENSG00000089009;ENSG00000089157;ENSG00000099622;ENSG00000100823;ENSG00000104889;ENSG00000105193;ENSG00000105372;ENSG00000105640;ENSG00000108107;ENSG00000108298;ENSG00000109475;ENSG00000110700;ENSG00000112306;ENSG00000114391;ENSG00000115268;ENSG00000118181;ENSG00000122026…
GO:0006605	protein targeting	http://amigo.geneontology.org/amigo/term/GO:0006605	0.395034	2.14729	0	0.00105264	370	99	ENSG00000003056;ENSG00000008988;ENSG00000025772;ENSG00000063177;ENSG00000071082;ENSG00000075785;ENSG00000083845;ENSG00000089009;ENSG00000089157;ENSG00000100300;ENSG00000100417;ENSG00000101473;ENSG00000105193;ENSG00000105372;ENSG00000105401;ENSG00000105640;ENSG00000105723;ENSG00000108107;ENSG00000108298;ENSG00000108733;ENSG00000109332;ENSG00000109475;ENSG00000110700;ENSG00000110711;ENSG00000112306…
GO:0002181	cytoplasmic translation	http://amigo.geneontology.org/amigo/term/GO:0002181	0.500601	2.20059	0	0.000532983	84	27	ENSG00000060138;ENSG00000063177;ENSG00000071082;ENSG00000089009;ENSG00000089157;ENSG00000105640;ENSG00000108298;ENSG00000114391;ENSG00000117543;ENSG00000130811;ENSG00000137818;ENSG00000142541;ENSG00000142676;ENSG00000144713;ENSG00000148399;ENSG00000156482;ENSG00000161016;ENSG00000162244;ENSG00000163682;ENSG00000171858;ENSG00000172809;ENSG00000174748;ENSG00000178982;ENSG00000182899;ENSG00000186468…
GO:0090150	establishment of protein localization to membrane	http://amigo.geneontology.org/amigo/term/GO:0090150	0.470397	2.4697	0	0	273	89	ENSG00000002330;ENSG00000008988;ENSG00000063177;ENSG00000064012;ENSG00000071082;ENSG00000083845;ENSG00000087088;ENSG00000089009;ENSG00000089157;ENSG00000101246;ENSG00000104081;ENSG00000105193;ENSG00000105372;ENSG00000105640;ENSG00000108107;ENSG00000108298;ENSG00000109113;ENSG00000109475;ENSG00000110700;ENSG00000112306;ENSG00000114391;ENSG00000114745;ENSG00000115268;ENSG00000116251;ENSG00000118181…
GO:0006413	translational initiation	http://amigo.geneontology.org/amigo/term/GO:0006413	0.558426	2.78945	0	0	179	67	ENSG00000008988;ENSG00000063177;ENSG00000071082;ENSG00000083845;ENSG00000089009;ENSG00000089157;ENSG00000105193;ENSG00000105372;ENSG00000105640;ENSG00000108107;ENSG00000108298;ENSG00000109475;ENSG00000110700;ENSG00000111361;ENSG00000112306;ENSG00000114391;ENSG00000114784;ENSG00000115268;ENSG00000118181;ENSG00000122026;ENSG00000125691;ENSG00000130811;ENSG00000131469;ENSG00000134419;ENSG00000136942…
GO:0070972	protein localization to endoplasmic reticulum	http://amigo.geneontology.org/amigo/term/GO:0070972	0.661784	3.1368	0	0	131	78	ENSG00000008988;ENSG00000063177;ENSG00000071082;ENSG00000083845;ENSG00000089009;ENSG00000089157;ENSG00000100417;ENSG00000105193;ENSG00000105372;ENSG00000105438;ENSG00000105640;ENSG00000108107;ENSG00000108298;ENSG00000109475;ENSG00000110700;ENSG00000112306;ENSG00000114391;ENSG00000115268;ENSG00000116251;ENSG00000118181;ENSG00000122026;ENSG00000122406;ENSG00000124614;ENSG00000125691;ENSG00000131469…

## Sheet: enrichment_results_polysomes_MF
geneSet	description	link	enrichmentScore	normalizedEnrichmentScore	pValue	FDR	size	leadingEdgeNum	userId
GO:0004386	helicase activity	http://amigo.geneontology.org/amigo/term/GO:0004386	-0.586097	-2.63147	0	0	135	75	ENSG00000020922;ENSG00000021776;ENSG00000039123;ENSG00000064703;ENSG00000067248;ENSG00000067596;ENSG00000071794;ENSG00000076003;ENSG00000079246;ENSG00000079785;ENSG00000080503;ENSG00000085224;ENSG00000088205;ENSG00000089737;ENSG00000089876;ENSG00000100297;ENSG00000100697;ENSG00000100888;ENSG00000101452;ENSG00000102038;ENSG00000104320;ENSG00000104738;ENSG00000104884;ENSG00000107201;ENSG00000107290…
GO:0016887	ATPase activity	http://amigo.geneontology.org/amigo/term/GO:0016887	-0.489227	-2.45752	0	0	348	166	ENSG00000005471;ENSG00000017260;ENSG00000017797;ENSG00000020426;ENSG00000020922;ENSG00000021574;ENSG00000023839;ENSG00000033050;ENSG00000035928;ENSG00000039123;ENSG00000047249;ENSG00000048649;ENSG00000051341;ENSG00000054523;ENSG00000058063;ENSG00000058668;ENSG00000064703;ENSG00000067248;ENSG00000067596;ENSG00000068796;ENSG00000070950;ENSG00000070961;ENSG00000071794;ENSG00000073734;ENSG00000073969…
GO:0042393	histone binding	http://amigo.geneontology.org/amigo/term/GO:0042393	-0.521588	-2.41274	0	0	166	87	ENSG00000005483;ENSG00000006459;ENSG00000008083;ENSG00000009954;ENSG00000010292;ENSG00000015171;ENSG00000028310;ENSG00000048649;ENSG00000055609;ENSG00000066135;ENSG00000067369;ENSG00000068878;ENSG00000073614;ENSG00000075856;ENSG00000076108;ENSG00000080503;ENSG00000083168;ENSG00000083544;ENSG00000085224;ENSG00000087206;ENSG00000092201;ENSG00000096717;ENSG00000096968;ENSG00000100749;ENSG00000100888…
GO:0016874	ligase activity	http://amigo.geneontology.org/amigo/term/GO:0016874	-0.529779	-2.35986	0	0	130	63	ENSG00000001084;ENSG00000005156;ENSG00000011376;ENSG00000031698;ENSG00000033178;ENSG00000035687;ENSG00000047230;ENSG00000059691;ENSG00000065427;ENSG00000067704;ENSG00000068366;ENSG00000073050;ENSG00000075239;ENSG00000078070;ENSG00000078747;ENSG00000081307;ENSG00000081760;ENSG00000100220;ENSG00000100714;ENSG00000103356;ENSG00000106105;ENSG00000110619;ENSG00000111058;ENSG00000113407;ENSG00000113643…
GO:0070063	RNA polymerase binding	http://amigo.geneontology.org/amigo/term/GO:0070063	-0.564041	-2.17541	0	0.000305335	55	20	ENSG00000006712;ENSG00000065243;ENSG00000069869;ENSG00000070814;ENSG00000085721;ENSG00000105176;ENSG00000109911;ENSG00000113649;ENSG00000122484;ENSG00000124151;ENSG00000134014;ENSG00000134371;ENSG00000134759;ENSG00000137815;ENSG00000137947;ENSG00000153187;ENSG00000162664;ENSG00000166197;ENSG00000166477;ENSG00000179119
GO:0003774	motor activity	http://amigo.geneontology.org/amigo/term/GO:0003774	-0.518933	-2.16262	0	0.000293591	87	45	ENSG00000054523;ENSG00000062725;ENSG00000066933;ENSG00000068796;ENSG00000077380;ENSG00000079616;ENSG00000089177;ENSG00000090889;ENSG00000099331;ENSG00000101350;ENSG00000108055;ENSG00000109063;ENSG00000112984;ENSG00000114841;ENSG00000115423;ENSG00000116852;ENSG00000118193;ENSG00000121621;ENSG00000126870;ENSG00000128833;ENSG00000128849;ENSG00000131437;ENSG00000133026;ENSG00000137177;ENSG00000137474…
GO:0016903	oxidoreductase activity, acting on the aldehyde or oxo group of donors	http://amigo.geneontology.org/amigo/term/GO:0016903	-0.640493	-2.15752	0	0.000268426	30	10	ENSG00000091140;ENSG00000110435;ENSG00000111275;ENSG00000119711;ENSG00000136010;ENSG00000143149;ENSG00000150768;ENSG00000164904;ENSG00000165092;ENSG00000181192
GO:0015631	tubulin binding	http://amigo.geneontology.org/amigo/term/GO:0015631	-0.42394	-2.06208	0	0.00124776	254	77	ENSG00000006715;ENSG00000007168;ENSG00000010244;ENSG00000011454;ENSG00000047410;ENSG00000054523;ENSG00000066629;ENSG00000068796;ENSG00000071054;ENSG00000076382;ENSG00000079616;ENSG00000079805;ENSG00000087470;ENSG00000089177;ENSG00000090889;ENSG00000096872;ENSG00000101350;ENSG00000101447;ENSG00000102781;ENSG00000107771;ENSG00000108055;ENSG00000115355;ENSG00000116852;ENSG00000118193;ENSG00000118200…
GO:0043531	ADP binding	http://amigo.geneontology.org/amigo/term/GO:0043531	-0.591657	-2.03127	0.000176149	0.00178764	32	17	ENSG00000001084;ENSG00000065833;ENSG00000067225;ENSG00000095002;ENSG00000099331;ENSG00000102144;ENSG00000120868;ENSG00000133026;ENSG00000137474;ENSG00000148672;ENSG00000152234;ENSG00000163050;ENSG00000163399;ENSG00000175792;ENSG00000196365;ENSG00000196535;ENSG00000196586
GO:0140030	modification-dependent protein binding	http://amigo.geneontology.org/amigo/term/GO:0140030	-0.453541	-2.01574	0	0.00219606	125	64	ENSG00000005483;ENSG00000006459;ENSG00000008083;ENSG00000010072;ENSG00000015171;ENSG00000028310;ENSG00000066135;ENSG00000067369;ENSG00000068878;ENSG00000070950;ENSG00000073614;ENSG00000076108;ENSG00000083544;ENSG00000085224;ENSG00000085832;ENSG00000087206;ENSG00000100888;ENSG00000101040;ENSG00000102081;ENSG00000105821;ENSG00000107077;ENSG00000117222;ENSG00000118058;ENSG00000119318;ENSG00000119778…
GO:0048156	tau protein binding	http://amigo.geneontology.org/amigo/term/GO:0048156	-0.547122	-1.96757	0	0.00380067	40	14	ENSG00000004478;ENSG00000067900;ENSG00000073921;ENSG00000080824;ENSG00000096384;ENSG00000100393;ENSG00000100600;ENSG00000120885;ENSG00000128881;ENSG00000132356;ENSG00000134318;ENSG00000160551;ENSG00000204843;ENSG00000275700
GO:0017056	structural constituent of nuclear pore	http://amigo.geneontology.org/amigo/term/GO:0017056	-0.623699	-1.95877	0.000534569	0.00397327	23	14	ENSG00000030066;ENSG00000047410;ENSG00000069248;ENSG00000095319;ENSG00000102900;ENSG00000108559;ENSG00000111581;ENSG00000113569;ENSG00000125351;ENSG00000125450;ENSG00000138750;ENSG00000139496;ENSG00000155561;ENSG00000163002
GO:0060589	nucleoside-triphosphatase regulator activity	http://amigo.geneontology.org/amigo/term/GO:0060589	-0.393932	-1.92119	0	0.00602539	255	89	ENSG00000011454;ENSG00000017797;ENSG00000024526;ENSG00000029725;ENSG00000052795;ENSG00000057608;ENSG00000065150;ENSG00000065491;ENSG00000066777;ENSG00000066933;ENSG00000067208;ENSG00000069345;ENSG00000075391;ENSG00000077232;ENSG00000086061;ENSG00000087470;ENSG00000093000;ENSG00000099250;ENSG00000099331;ENSG00000100852;ENSG00000100934;ENSG00000101310;ENSG00000105821;ENSG00000106299;ENSG00000107863…
GO:0003725	double-stranded RNA binding	http://amigo.geneontology.org/amigo/term/GO:0003725	-0.482536	-1.88293	0.000335965	0.00874063	59	31	ENSG00000040341;ENSG00000055332;ENSG00000056097;ENSG00000056586;ENSG00000063046;ENSG00000072110;ENSG00000072274;ENSG00000079785;ENSG00000096384;ENSG00000100697;ENSG00000102081;ENSG00000107201;ENSG00000114416;ENSG00000124831;ENSG00000126070;ENSG00000134698;ENSG00000135870;ENSG00000135900;ENSG00000143621;ENSG00000144381;ENSG00000147649;ENSG00000148584;ENSG00000153187;ENSG00000156502;ENSG00000165209…
GO:0140098	catalytic activity, acting on RNA	http://amigo.geneontology.org/amigo/term/GO:0140098	-0.373671	-1.86426	0	0.0099821	320	121	ENSG00000006744;ENSG00000011376;ENSG00000031698;ENSG00000037474;ENSG00000039123;ENSG00000043514;ENSG00000047315;ENSG00000059588;ENSG00000059691;ENSG00000064703;ENSG00000065427;ENSG00000066651;ENSG00000067248;ENSG00000067596;ENSG00000067704;ENSG00000079785;ENSG00000083223;ENSG00000083520;ENSG00000087995;ENSG00000088205;ENSG00000088930;ENSG00000089737;ENSG00000100220;ENSG00000100697;ENSG00000100890…
GO:0001098	basal transcription machinery binding	http://amigo.geneontology.org/amigo/term/GO:0001098	-0.492511	-1.86096	0.00034459	0.00968851	50	23	ENSG00000006712;ENSG00000055044;ENSG00000060069;ENSG00000064313;ENSG00000105176;ENSG00000109911;ENSG00000117174;ENSG00000124151;ENSG00000134014;ENSG00000134371;ENSG00000134759;ENSG00000137815;ENSG00000137947;ENSG00000153187;ENSG00000153767;ENSG00000162664;ENSG00000166477;ENSG00000175595;ENSG00000175792;ENSG00000178913;ENSG00000197265;ENSG00000198730;ENSG00000213079
GO:0008237	metallopeptidase activity	http://amigo.geneontology.org/amigo/term/GO:0008237	-0.431125	-1.84371	0	0.0111565	99	42	ENSG00000002549;ENSG00000010256;ENSG00000012174;ENSG00000027001;ENSG00000072657;ENSG00000078618;ENSG00000084073;ENSG00000086205;ENSG00000099219;ENSG00000105819;ENSG00000107959;ENSG00000108582;ENSG00000109472;ENSG00000111142;ENSG00000112818;ENSG00000113441;ENSG00000117298;ENSG00000123213;ENSG00000124356;ENSG00000133313;ENSG00000135049;ENSG00000135678;ENSG00000136758;ENSG00000137845;ENSG00000138792…
GO:0030515	snoRNA binding	http://amigo.geneontology.org/amigo/term/GO:0030515	-0.545828	-1.83849	0.000710606	0.0111956	31	11	ENSG00000065183;ENSG00000083635;ENSG00000087269;ENSG00000108651;ENSG00000117597;ENSG00000130826;ENSG00000165732;ENSG00000165733;ENSG00000166167;ENSG00000166197;ENSG00000167721
GO:0032451	demethylase activity	http://amigo.geneontology.org/amigo/term/GO:0032451	-0.531056	-1.83198	0.00141168	0.0114593	33	21	ENSG00000004487;ENSG00000006459;ENSG00000008083;ENSG00000066135;ENSG00000073614;ENSG00000100601;ENSG00000107077;ENSG00000115548;ENSG00000117139;ENSG00000120733;ENSG00000126012;ENSG00000127663;ENSG00000140718;ENSG00000147050;ENSG00000150347;ENSG00000165097;ENSG00000170468;ENSG00000171988;ENSG00000172943;ENSG00000173120;ENSG00000197724
GO:0003697	single-stranded DNA binding	http://amigo.geneontology.org/amigo/term/GO:0003697	-0.422645	-1.80655	0	0.0143507	97	41	ENSG00000065328;ENSG00000070950;ENSG00000076003;ENSG00000076242;ENSG00000084463;ENSG00000095002;ENSG00000101347;ENSG00000101773;ENSG00000104177;ENSG00000104738;ENSG00000111247;ENSG00000113318;ENSG00000113522;ENSG00000113810;ENSG00000119318;ENSG00000121671;ENSG00000122512;ENSG00000132383;ENSG00000132604;ENSG00000134758;ENSG00000136824;ENSG00000137815;ENSG00000138095;ENSG00000139618;ENSG00000144381…
GO:0101005	ubiquitinyl hydrolase activity	http://amigo.geneontology.org/amigo/term/GO:0101005	-0.423991	-1.784	0.000162549	0.0174533	90	43	ENSG00000048028;ENSG00000058056;ENSG00000066427;ENSG00000083799;ENSG00000085982;ENSG00000090686;ENSG00000101557;ENSG00000102226;ENSG00000103194;ENSG00000106346;ENSG00000109189;ENSG00000111667;ENSG00000114316;ENSG00000114742;ENSG00000115464;ENSG00000121644;ENSG00000124356;ENSG00000124486;ENSG00000128923;ENSG00000135093;ENSG00000135655;ENSG00000135913;ENSG00000138592;ENSG00000140455;ENSG00000143409…
GO:0017025	TBP-class protein binding	http://amigo.geneontology.org/amigo/term/GO:0017025	-0.573543	-1.74227	0.00701439	0.025772	20	11	ENSG00000100764;ENSG00000106546;ENSG00000111530;ENSG00000115750;ENSG00000137947;ENSG00000147133;ENSG00000161057;ENSG00000163872;ENSG00000165417;ENSG00000169813;ENSG00000175792
GO:0051082	unfolded protein binding	http://amigo.geneontology.org/amigo/term/GO:0051082	-0.398708	-1.70857	0.000646726	0.0341178	100	30	ENSG00000069345;ENSG00000074695;ENSG00000080824;ENSG00000086061;ENSG00000096384;ENSG00000100380;ENSG00000102580;ENSG00000102595;ENSG00000109971;ENSG00000113013;ENSG00000114857;ENSG00000115484;ENSG00000126602;ENSG00000127022;ENSG00000135624;ENSG00000138398;ENSG00000141385;ENSG00000144381;ENSG00000144736;ENSG00000146731;ENSG00000150753;ENSG00000153132;ENSG00000155304;ENSG00000156261;ENSG00000163468…
GO:0070840	dynein complex binding	http://amigo.geneontology.org/amigo/term/GO:0070840	-0.592582	-1.70563	0.0106402	0.0335868	16	7	ENSG00000007168;ENSG00000047410;ENSG00000108055;ENSG00000117724;ENSG00000134982;ENSG00000185963;ENSG00000204843
GO:0002039	p53 binding	http://amigo.geneontology.org/amigo/term/GO:0002039	-0.43372	-1.68389	0.00375107	0.0396137	58	18	ENSG00000004487;ENSG00000067369;ENSG00000096717;ENSG00000100393;ENSG00000100644;ENSG00000100888;ENSG00000103194;ENSG00000116478;ENSG00000127616;ENSG00000135679;ENSG00000144381;ENSG00000147133;ENSG00000155827;ENSG00000165632;ENSG00000166164;ENSG00000181090;ENSG00000187555;ENSG00000197386
GO:0003779	actin binding	http://amigo.geneontology.org/amigo/term/GO:0003779	-0.343833	-1.68293	0	0.0384108	273	84	ENSG00000006611;ENSG00000044115;ENSG00000050405;ENSG00000066933;ENSG00000071127;ENSG00000073712;ENSG00000079819;ENSG00000087274;ENSG00000092439;ENSG00000095637;ENSG00000099331;ENSG00000100592;ENSG00000101605;ENSG00000102024;ENSG00000104164;ENSG00000106078;ENSG00000106299;ENSG00000109063;ENSG00000110880;ENSG00000112186;ENSG00000115091;ENSG00000115355;ENSG00000119321;ENSG00000119326;ENSG00000120756…
GO:0008022	protein C-terminus binding	http://amigo.geneontology.org/amigo/term/GO:0008022	-0.365795	-1.67254	0	0.0409462	154	49	ENSG00000009844;ENSG00000020922;ENSG00000053254;ENSG00000075711;ENSG00000077097;ENSG00000077942;ENSG00000079246;ENSG00000095002;ENSG00000096717;ENSG00000096968;ENSG00000100393;ENSG00000102753;ENSG00000104884;ENSG00000107186;ENSG00000111961;ENSG00000115053;ENSG00000117523;ENSG00000117724;ENSG00000119541;ENSG00000121058;ENSG00000123240;ENSG00000126001;ENSG00000130396;ENSG00000131747;ENSG00000132356…
GO:0005516	calmodulin binding	http://amigo.geneontology.org/amigo/term/GO:0005516	-0.384421	-1.66776	0.000961693	0.041195	107	51	ENSG00000058668;ENSG00000066279;ENSG00000067715;ENSG00000070961;ENSG00000079385;ENSG00000087274;ENSG00000099331;ENSG00000102189;ENSG00000102893;ENSG00000104067;ENSG00000107758;ENSG00000109063;ENSG00000109501;ENSG00000115252;ENSG00000115808;ENSG00000118200;ENSG00000122786;ENSG00000127481;ENSG00000128641;ENSG00000128833;ENSG00000130559;ENSG00000133026;ENSG00000136861;ENSG00000137474;ENSG00000138814…
GO:0016769	transferase activity, transferring nitrogenous groups	http://amigo.geneontology.org/amigo/term/GO:0016769	-0.554495	-1.66561	0.0155572	0.0405642	19	7	ENSG00000060982;ENSG00000065154;ENSG00000120053;ENSG00000125166;ENSG00000135069;ENSG00000183044;ENSG00000198380
GO:0005112	Notch binding	http://amigo.geneontology.org/amigo/term/GO:0005112	-0.589168	-1.65974	0.0185764	0.0413572	15	4	ENSG00000036257;ENSG00000100603;ENSG00000115977;ENSG00000151694
GO:0042162	telomeric DNA binding	http://amigo.geneontology.org/amigo/term/GO:0042162	-0.470219	-1.65734	0.00867905	0.0407542	36	15	ENSG00000004487;ENSG00000067369;ENSG00000079246;ENSG00000113522;ENSG00000115053;ENSG00000116698;ENSG00000132383;ENSG00000132604;ENSG00000147601;ENSG00000151461;ENSG00000157106;ENSG00000165392;ENSG00000166848;ENSG00000178971;ENSG00000196419
GO:0008565	protein transporter activity	http://amigo.geneontology.org/amigo/term/GO:0008565	-0.403866	-1.65193	0.00215267	0.0415652	76	21	ENSG00000025796;ENSG00000025800;ENSG00000064419;ENSG00000065150;ENSG00000069329;ENSG00000082898;ENSG00000086200;ENSG00000102753;ENSG00000108424;ENSG00000114030;ENSG00000124207;ENSG00000133704;ENSG00000135775;ENSG00000138760;ENSG00000138768;ENSG00000154174;ENSG00000154305;ENSG00000176783;ENSG00000182481;ENSG00000198700;ENSG00000242247
GO:0017124	SH3 domain binding	http://amigo.geneontology.org/amigo/term/GO:0017124	-0.385125	-1.63148	0.00277099	0.0482344	92	37	ENSG00000062598;ENSG00000078269;ENSG00000079805;ENSG00000085832;ENSG00000103994;ENSG00000108091;ENSG00000110395;ENSG00000112531;ENSG00000113657;ENSG00000115904;ENSG00000116675;ENSG00000121774;ENSG00000122966;ENSG00000128512;ENSG00000135597;ENSG00000136754;ENSG00000136848;ENSG00000137845;ENSG00000138592;ENSG00000140750;ENSG00000141198;ENSG00000143514;ENSG00000147010;ENSG00000150760;ENSG00000151694…
GO:0032947	protein-containing complex scaffold activity	http://amigo.geneontology.org/amigo/term/GO:0032947	-0.398905	-1.62872	0.00431894	0.0480902	75	22	ENSG00000008294;ENSG00000023287;ENSG00000057294;ENSG00000075711;ENSG00000081026;ENSG00000106263;ENSG00000111961;ENSG00000114867;ENSG00000122545;ENSG00000125107;ENSG00000125354;ENSG00000127914;ENSG00000138757;ENSG00000138758;ENSG00000151276;ENSG00000151718;ENSG00000155229;ENSG00000164164;ENSG00000178104;ENSG00000186522;ENSG00000197860;ENSG00000205726
GO:0017137	Rab GTPase binding	http://amigo.geneontology.org/amigo/term/GO:0017137	-0.359507	-1.62469	0.000472664	0.04831	147	59	ENSG00000003393;ENSG00000011454;ENSG00000038532;ENSG00000065491;ENSG00000065882;ENSG00000066455;ENSG00000067208;ENSG00000073921;ENSG00000073969;ENSG00000082805;ENSG00000087470;ENSG00000089177;ENSG00000104093;ENSG00000104419;ENSG00000107036;ENSG00000107560;ENSG00000109436;ENSG00000110047;ENSG00000110514;ENSG00000114331;ENSG00000115839;ENSG00000118873;ENSG00000121749;ENSG00000123240;ENSG00000131374…
GO:0000049	tRNA binding	http://amigo.geneontology.org/amigo/term/GO:0000049	-0.422162	-1.62402	0.00678196	0.047229	56	22	ENSG00000037474;ENSG00000065427;ENSG00000066651;ENSG00000067704;ENSG00000103356;ENSG00000109618;ENSG00000110619;ENSG00000113048;ENSG00000113407;ENSG00000113643;ENSG00000117593;ENSG00000121486;ENSG00000128829;ENSG00000129480;ENSG00000134684;ENSG00000137760;ENSG00000138385;ENSG00000139131;ENSG00000152778;ENSG00000165525;ENSG00000166986;ENSG00000196305
GO:0016705	oxidoreductase activity, acting on paired donors, with incorporation or reduction of molecular oxygen	http://amigo.geneontology.org/amigo/term/GO:0016705	-0.385052	-1.62331	0.004148	0.0463112	92	32	ENSG00000006459;ENSG00000052802;ENSG00000066135;ENSG00000072682;ENSG00000076258;ENSG00000083444;ENSG00000087263;ENSG00000099194;ENSG00000104549;ENSG00000107077;ENSG00000107537;ENSG00000111012;ENSG00000119004;ENSG00000122787;ENSG00000122884;ENSG00000124212;ENSG00000127948;ENSG00000134716;ENSG00000134824;ENSG00000137760;ENSG00000138336;ENSG00000140718;ENSG00000145730;ENSG00000146233;ENSG00000152952…
GO:0008238	exopeptidase activity	http://amigo.geneontology.org/amigo/term/GO:0008238	-0.39543	-1.61474	0.00518481	0.0487207	76	30	ENSG00000002549;ENSG00000072657;ENSG00000074603;ENSG00000084073;ENSG00000085377;ENSG00000086205;ENSG00000106066;ENSG00000108578;ENSG00000108582;ENSG00000111142;ENSG00000113441;ENSG00000128923;ENSG00000133313;ENSG00000134900;ENSG00000135049;ENSG00000135678;ENSG00000136193;ENSG00000138078;ENSG00000138792;ENSG00000143494;ENSG00000144306;ENSG00000146281;ENSG00000156103;ENSG00000157227;ENSG00000164024…
GO:0003729	mRNA binding	http://amigo.geneontology.org/amigo/term/GO:0003729	-0.341893	-1.60908	0	0.0496545	197	76	ENSG00000021776;ENSG00000047410;ENSG00000056586;ENSG00000068784;ENSG00000073792;ENSG00000074356;ENSG00000075151;ENSG00000082516;ENSG00000091009;ENSG00000099783;ENSG00000100296;ENSG00000100320;ENSG00000100353;ENSG00000101811;ENSG00000102081;ENSG00000103549;ENSG00000104177;ENSG00000104824;ENSG00000107581;ENSG00000108848;ENSG00000111605;ENSG00000114416;ENSG00000114867;ENSG00000115053;ENSG00000115524…
GO:0005484	SNAP receptor activity	http://amigo.geneontology.org/amigo/term/GO:0005484	0.528903	1.79662	0.00547071	0.0487637	26	15	ENSG00000092531;ENSG00000103496;ENSG00000104915;ENSG00000106089;ENSG00000106636;ENSG00000111450;ENSG00000113734;ENSG00000117758;ENSG00000124222;ENSG00000132639;ENSG00000135823;ENSG00000143740;ENSG00000151532;ENSG00000162236;ENSG00000177951
GO:0070003	threonine-type peptidase activity	http://amigo.geneontology.org/amigo/term/GO:0070003	0.659228	1.95849	0.0013155	0.0112512	16	12	ENSG00000008018;ENSG00000041357;ENSG00000100804;ENSG00000100902;ENSG00000101182;ENSG00000106588;ENSG00000126067;ENSG00000142507;ENSG00000143106;ENSG00000159377;ENSG00000205220;ENSG00000277791
GO:0019843	rRNA binding	http://amigo.geneontology.org/amigo/term/GO:0019843	0.563871	2.34196	0	3.73382e-05	61	24	ENSG00000083845;ENSG00000089157;ENSG00000099622;ENSG00000102317;ENSG00000108298;ENSG00000110700;ENSG00000125691;ENSG00000128311;ENSG00000132591;ENSG00000142534;ENSG00000142676;ENSG00000145592;ENSG00000149273;ENSG00000161016;ENSG00000163682;ENSG00000164587;ENSG00000170889;ENSG00000177971;ENSG00000197958;ENSG00000198034;ENSG00000198242;ENSG00000231500;ENSG00000239789;ENSG00000273899
GO:0003735	structural constituent of ribosome	http://amigo.geneontology.org/amigo/term/GO:0003735	0.686732	3.33371	0	0	150	83	ENSG00000008988;ENSG00000055950;ENSG00000063177;ENSG00000071082;ENSG00000074071;ENSG00000083845;ENSG00000086504;ENSG00000089009;ENSG00000089157;ENSG00000105193;ENSG00000105364;ENSG00000105372;ENSG00000105640;ENSG00000108107;ENSG00000108298;ENSG00000108826;ENSG00000109475;ENSG00000110700;ENSG00000112306;ENSG00000114391;ENSG00000115268;ENSG00000116251;ENSG00000122026;ENSG00000122406;ENSG00000124614…

## Sheet: enrichment_results_polysomes_CC
geneSet	description	link	enrichmentScore	normalizedEnrichmentScore	pValue	FDR	size	leadingEdgeNum	userId
GO:0034399	nuclear periphery	http://amigo.geneontology.org/amigo/term/GO:0034399	-0.515159	-2.27118	0	0.000121093	119	47	ENSG00000011243;ENSG00000047410;ENSG00000053900;ENSG00000065150;ENSG00000066777;ENSG00000072501;ENSG00000079134;ENSG00000083312;ENSG00000083635;ENSG00000087338;ENSG00000090889;ENSG00000095637;ENSG00000096063;ENSG00000096968;ENSG00000099783;ENSG00000100603;ENSG00000100811;ENSG00000101868;ENSG00000101972;ENSG00000102900;ENSG00000108055;ENSG00000108424;ENSG00000111581;ENSG00000116560;ENSG00000117724…
GO:0030684	preribosome	http://amigo.geneontology.org/amigo/term/GO:0030684	-0.549917	-2.23064	0	0.000121093	72	27	ENSG00000001497;ENSG00000011260;ENSG00000058729;ENSG00000065183;ENSG00000087269;ENSG00000100029;ENSG00000108592;ENSG00000108651;ENSG00000115761;ENSG00000117597;ENSG00000120800;ENSG00000124383;ENSG00000129347;ENSG00000135521;ENSG00000138442;ENSG00000148843;ENSG00000151304;ENSG00000156697;ENSG00000160208;ENSG00000160214;ENSG00000164934;ENSG00000165733;ENSG00000166167;ENSG00000167721;ENSG00000171490…
GO:0044450	microtubule organizing center part	http://amigo.geneontology.org/amigo/term/GO:0044450	-0.461497	-2.10929	0	0.000444008	153	71	ENSG00000012048;ENSG00000032742;ENSG00000044459;ENSG00000051825;ENSG00000054282;ENSG00000067900;ENSG00000068796;ENSG00000075702;ENSG00000076382;ENSG00000078674;ENSG00000083535;ENSG00000100503;ENSG00000100578;ENSG00000100629;ENSG00000101624;ENSG00000101639;ENSG00000103540;ENSG00000103995;ENSG00000107854;ENSG00000108423;ENSG00000110274;ENSG00000111057;ENSG00000111554;ENSG00000115355;ENSG00000116127…
GO:0098687	chromosomal region	http://amigo.geneontology.org/amigo/term/GO:0098687	-0.416323	-2.06577	0	0.000847652	299	100	ENSG00000004487;ENSG00000007168;ENSG00000009954;ENSG00000010244;ENSG00000010292;ENSG00000030066;ENSG00000040275;ENSG00000047315;ENSG00000047410;ENSG00000058272;ENSG00000062650;ENSG00000066135;ENSG00000067066;ENSG00000067369;ENSG00000069248;ENSG00000072501;ENSG00000076003;ENSG00000076382;ENSG00000079134;ENSG00000079246;ENSG00000079616;ENSG00000080345;ENSG00000080986;ENSG00000082898;ENSG00000083642…
GO:0008023	transcription elongation factor complex	http://amigo.geneontology.org/amigo/term/GO:0008023	-0.537775	-2.04278	0	0.00101718	52	28	ENSG00000006712;ENSG00000011007;ENSG00000072364;ENSG00000083635;ENSG00000090061;ENSG00000092201;ENSG00000100603;ENSG00000109111;ENSG00000109911;ENSG00000116830;ENSG00000118985;ENSG00000128915;ENSG00000134014;ENSG00000134371;ENSG00000134759;ENSG00000137815;ENSG00000139687;ENSG00000144161;ENSG00000144218;ENSG00000146263;ENSG00000155966;ENSG00000164151;ENSG00000166477;ENSG00000167258;ENSG00000168137…
GO:0101031	chaperone complex	http://amigo.geneontology.org/amigo/term/GO:0101031	-0.670728	-2.04235	0.000178094	0.000867834	20	10	ENSG00000096384;ENSG00000115484;ENSG00000135624;ENSG00000146731;ENSG00000150753;ENSG00000156261;ENSG00000163468;ENSG00000165699;ENSG00000166226;ENSG00000168439
GO:0015030	Cajal body	http://amigo.geneontology.org/amigo/term/GO:0015030	-0.528025	-2.0051	0	0.00143582	52	19	ENSG00000041802;ENSG00000075856;ENSG00000082898;ENSG00000108883;ENSG00000121058;ENSG00000128915;ENSG00000130826;ENSG00000136875;ENSG00000137574;ENSG00000144161;ENSG00000144736;ENSG00000145833;ENSG00000164151;ENSG00000164902;ENSG00000166197;ENSG00000167978;ENSG00000174606;ENSG00000175467;ENSG00000198231
GO:0090734	site of DNA damage	http://amigo.geneontology.org/amigo/term/GO:0090734	-0.508377	-2.00098	0.000167504	0.00127148	61	27	ENSG00000067369;ENSG00000070950;ENSG00000079246;ENSG00000080345;ENSG00000082068;ENSG00000092470;ENSG00000101347;ENSG00000101596;ENSG00000101773;ENSG00000104320;ENSG00000112130;ENSG00000113522;ENSG00000115091;ENSG00000122008;ENSG00000132383;ENSG00000133302;ENSG00000134758;ENSG00000138071;ENSG00000143799;ENSG00000163029;ENSG00000163104;ENSG00000163961;ENSG00000165392;ENSG00000166439;ENSG00000169621…
GO:0005819	spindle	http://amigo.geneontology.org/amigo/term/GO:0005819	-0.401236	-1.98676	0	0.00135893	300	120	ENSG00000004897;ENSG00000007168;ENSG00000010244;ENSG00000013810;ENSG00000036257;ENSG00000037474;ENSG00000040275;ENSG00000047410;ENSG00000060069;ENSG00000066279;ENSG00000066629;ENSG00000067208;ENSG00000068796;ENSG00000072501;ENSG00000075945;ENSG00000076382;ENSG00000079616;ENSG00000080345;ENSG00000083799;ENSG00000086827;ENSG00000090889;ENSG00000099910;ENSG00000100154;ENSG00000100503;ENSG00000100629…
GO:0016607	nuclear speck	http://amigo.geneontology.org/amigo/term/GO:0016607	-0.38139	-1.90945	0	0.00379022	335	119	ENSG00000005483;ENSG00000010072;ENSG00000011243;ENSG00000029363;ENSG00000068878;ENSG00000074356;ENSG00000075292;ENSG00000075856;ENSG00000076108;ENSG00000077684;ENSG00000079134;ENSG00000079616;ENSG00000083168;ENSG00000087365;ENSG00000091009;ENSG00000096401;ENSG00000099995;ENSG00000100227;ENSG00000100266;ENSG00000100324;ENSG00000100325;ENSG00000100603;ENSG00000100644;ENSG00000100722;ENSG00000100813…
GO:0005874	microtubule	http://amigo.geneontology.org/amigo/term/GO:0005874	-0.382273	-1.89948	0	0.00399607	311	122	ENSG00000004478;ENSG00000004897;ENSG00000007168;ENSG00000010244;ENSG00000036257;ENSG00000040341;ENSG00000054523;ENSG00000062725;ENSG00000066279;ENSG00000066629;ENSG00000068796;ENSG00000075711;ENSG00000075945;ENSG00000076382;ENSG00000077380;ENSG00000078269;ENSG00000079616;ENSG00000079805;ENSG00000083799;ENSG00000086827;ENSG00000087470;ENSG00000089177;ENSG00000090889;ENSG00000099910;ENSG00000100503…
GO:0000793	condensed chromosome	http://amigo.geneontology.org/amigo/term/GO:0000793	-0.401695	-1.87554	0.000152695	0.00497491	179	61	ENSG00000009954;ENSG00000010244;ENSG00000010292;ENSG00000040275;ENSG00000062650;ENSG00000067369;ENSG00000069248;ENSG00000072501;ENSG00000076382;ENSG00000080345;ENSG00000080986;ENSG00000085224;ENSG00000086827;ENSG00000100029;ENSG00000101972;ENSG00000102974;ENSG00000108055;ENSG00000109805;ENSG00000111581;ENSG00000113522;ENSG00000113810;ENSG00000117650;ENSG00000117724;ENSG00000118007;ENSG00000121152…
GO:0005657	replication fork	http://amigo.geneontology.org/amigo/term/GO:0005657	-0.464032	-1.85826	0.000672948	0.00555166	66	23	ENSG00000009954;ENSG00000035928;ENSG00000065328;ENSG00000067369;ENSG00000070950;ENSG00000077514;ENSG00000096401;ENSG00000101868;ENSG00000104320;ENSG00000111602;ENSG00000112118;ENSG00000121988;ENSG00000130816;ENSG00000132383;ENSG00000146143;ENSG00000146676;ENSG00000153147;ENSG00000163104;ENSG00000165392;ENSG00000171566;ENSG00000196584;ENSG00000198554;ENSG00000198900
GO:0035327	transcriptionally active chromatin	http://amigo.geneontology.org/amigo/term/GO:0035327	-0.604089	-1.84221	0.00290381	0.00614115	20	11	ENSG00000005483;ENSG00000006712;ENSG00000072364;ENSG00000109111;ENSG00000128915;ENSG00000141456;ENSG00000144161;ENSG00000164151;ENSG00000164985;ENSG00000171824;ENSG00000198677
GO:0045178	basal part of cell	http://amigo.geneontology.org/amigo/term/GO:0045178	-0.53759	-1.82369	0.00179921	0.0071445	31	19	ENSG00000065361;ENSG00000074054;ENSG00000079385;ENSG00000085832;ENSG00000089057;ENSG00000091409;ENSG00000091513;ENSG00000105976;ENSG00000112851;ENSG00000116641;ENSG00000118762;ENSG00000144824;ENSG00000146648;ENSG00000151150;ENSG00000151914;ENSG00000163539;ENSG00000164171;ENSG00000204217;ENSG00000213949
GO:1904949	ATPase complex	http://amigo.geneontology.org/amigo/term/GO:1904949	-0.438159	-1.82307	0.000161865	0.00675094	84	30	ENSG00000028310;ENSG00000035928;ENSG00000048649;ENSG00000057935;ENSG00000080503;ENSG00000099954;ENSG00000100281;ENSG00000100811;ENSG00000102038;ENSG00000111642;ENSG00000112983;ENSG00000116478;ENSG00000127616;ENSG00000128908;ENSG00000136044;ENSG00000139613;ENSG00000139687;ENSG00000141380;ENSG00000153147;ENSG00000157500;ENSG00000162521;ENSG00000163399;ENSG00000163939;ENSG00000170004;ENSG00000171634…
GO:0005875	microtubule associated complex	http://amigo.geneontology.org/amigo/term/GO:0005875	-0.415316	-1.81356	0	0.00701628	112	45	ENSG00000007168;ENSG00000011454;ENSG00000047410;ENSG00000047849;ENSG00000054523;ENSG00000062725;ENSG00000066629;ENSG00000068796;ENSG00000075945;ENSG00000077380;ENSG00000079616;ENSG00000089177;ENSG00000090889;ENSG00000101350;ENSG00000112984;ENSG00000114520;ENSG00000114841;ENSG00000115423;ENSG00000116852;ENSG00000118193;ENSG00000121621;ENSG00000126870;ENSG00000131351;ENSG00000131437;ENSG00000131711…
GO:0005681	spliceosomal complex	http://amigo.geneontology.org/amigo/term/GO:0005681	-0.390072	-1.80522	0	0.00722523	169	50	ENSG00000021776;ENSG00000033030;ENSG00000039123;ENSG00000068394;ENSG00000076650;ENSG00000086589;ENSG00000087365;ENSG00000089682;ENSG00000096401;ENSG00000099783;ENSG00000099995;ENSG00000100603;ENSG00000101343;ENSG00000102241;ENSG00000106344;ENSG00000108883;ENSG00000109971;ENSG00000112739;ENSG00000113141;ENSG00000115524;ENSG00000122692;ENSG00000125944;ENSG00000132792;ENSG00000133226;ENSG00000136875…
GO:0099023	tethering complex	http://amigo.geneontology.org/amigo/term/GO:0099023	-0.461419	-1.80473	0.0010218	0.00687682	61	24	ENSG00000006715;ENSG00000070367;ENSG00000086827;ENSG00000090989;ENSG00000103051;ENSG00000131558;ENSG00000133103;ENSG00000134709;ENSG00000135249;ENSG00000135775;ENSG00000138190;ENSG00000139719;ENSG00000141252;ENSG00000144036;ENSG00000151779;ENSG00000153339;ENSG00000156931;ENSG00000164597;ENSG00000167632;ENSG00000168172;ENSG00000168538;ENSG00000180104;ENSG00000198382;ENSG00000213380
GO:0031252	cell leading edge	http://amigo.geneontology.org/amigo/term/GO:0031252	-0.358269	-1.76844	0	0.00948765	290	113	ENSG00000003393;ENSG00000004399;ENSG00000007168;ENSG00000008086;ENSG00000018189;ENSG00000028528;ENSG00000044115;ENSG00000049130;ENSG00000050405;ENSG00000061676;ENSG00000065243;ENSG00000065613;ENSG00000067900;ENSG00000070961;ENSG00000072110;ENSG00000073712;ENSG00000078269;ENSG00000079805;ENSG00000083857;ENSG00000092439;ENSG00000100266;ENSG00000104635;ENSG00000106078;ENSG00000106299;ENSG00000107099…
GO:0032039	integrator complex	http://amigo.geneontology.org/amigo/term/GO:0032039	-0.622771	-1.75075	0.00716385	0.0109272	15	10	ENSG00000104299;ENSG00000108506;ENSG00000138785;ENSG00000143493;ENSG00000143624;ENSG00000149262;ENSG00000164190;ENSG00000164941;ENSG00000180357;ENSG00000185085
GO:0043209	myelin sheath	http://amigo.geneontology.org/amigo/term/GO:0043209	-0.394868	-1.7476	0.000480615	0.0108158	125	47	ENSG00000014641;ENSG00000023228;ENSG00000057608;ENSG00000067225;ENSG00000071127;ENSG00000072415;ENSG00000073578;ENSG00000073969;ENSG00000075711;ENSG00000080824;ENSG00000091140;ENSG00000092621;ENSG00000104833;ENSG00000105220;ENSG00000107186;ENSG00000109971;ENSG00000110955;ENSG00000114573;ENSG00000119689;ENSG00000125166;ENSG00000127022;ENSG00000131558;ENSG00000132305;ENSG00000135821;ENSG00000136143…
GO:0044441	ciliary part	http://amigo.geneontology.org/amigo/term/GO:0044441	-0.352106	-1.73133	0	0.0121883	279	102	ENSG00000006611;ENSG00000007062;ENSG00000008086;ENSG00000032742;ENSG00000040199;ENSG00000047849;ENSG00000058668;ENSG00000068796;ENSG00000072840;ENSG00000075945;ENSG00000077684;ENSG00000078142;ENSG00000078246;ENSG00000078674;ENSG00000083799;ENSG00000085832;ENSG00000096872;ENSG00000100503;ENSG00000100578;ENSG00000100592;ENSG00000100629;ENSG00000101350;ENSG00000103351;ENSG00000104833;ENSG00000105220…
GO:1990391	DNA repair complex	http://amigo.geneontology.org/amigo/term/GO:1990391	-0.481259	-1.71662	0.00540918	0.0136078	38	17	ENSG00000004487;ENSG00000067369;ENSG00000073050;ENSG00000076242;ENSG00000079246;ENSG00000089902;ENSG00000095002;ENSG00000113318;ENSG00000119318;ENSG00000122512;ENSG00000149311;ENSG00000152457;ENSG00000154767;ENSG00000165392;ENSG00000175595;ENSG00000196419;ENSG00000253729
GO:0017053	transcriptional repressor complex	http://amigo.geneontology.org/amigo/term/GO:0017053	-0.421742	-1.71491	0.00164528	0.0132573	75	25	ENSG00000024526;ENSG00000032219;ENSG00000057935;ENSG00000064703;ENSG00000065526;ENSG00000076108;ENSG00000084093;ENSG00000089902;ENSG00000096717;ENSG00000101773;ENSG00000111642;ENSG00000116478;ENSG00000131263;ENSG00000132275;ENSG00000136044;ENSG00000141027;ENSG00000153147;ENSG00000157500;ENSG00000162521;ENSG00000168214;ENSG00000169375;ENSG00000170004;ENSG00000183814;ENSG00000196591;ENSG00000198160
GO:0030496	midbody	http://amigo.geneontology.org/amigo/term/GO:0030496	-0.373621	-1.71077	0.00015569	0.0132923	159	53	ENSG00000002549;ENSG00000051382;ENSG00000060069;ENSG00000065243;ENSG00000066279;ENSG00000070367;ENSG00000072121;ENSG00000076382;ENSG00000078142;ENSG00000079805;ENSG00000090889;ENSG00000090989;ENSG00000100154;ENSG00000101350;ENSG00000110318;ENSG00000112130;ENSG00000114346;ENSG00000117650;ENSG00000117724;ENSG00000118193;ENSG00000119397;ENSG00000119541;ENSG00000122545;ENSG00000122966;ENSG00000125354…
GO:0031514	motile cilium	http://amigo.geneontology.org/amigo/term/GO:0031514	-0.399395	-1.66809	0.00199269	0.0191372	87	29	ENSG00000007168;ENSG00000032742;ENSG00000036257;ENSG00000058668;ENSG00000068796;ENSG00000091140;ENSG00000096872;ENSG00000100592;ENSG00000100644;ENSG00000105792;ENSG00000105948;ENSG00000114841;ENSG00000117477;ENSG00000118557;ENSG00000118762;ENSG00000122545;ENSG00000125124;ENSG00000125354;ENSG00000133393;ENSG00000137075;ENSG00000138587;ENSG00000140057;ENSG00000140463;ENSG00000140526;ENSG00000156313…
GO:0005849	mRNA cleavage factor complex	http://amigo.geneontology.org/amigo/term/GO:0005849	-0.546465	-1.66604	0.0145959	0.0187651	20	7	ENSG00000101811;ENSG00000111605;ENSG00000119203;ENSG00000136709;ENSG00000145216;ENSG00000165934;ENSG00000177613
GO:0043292	contractile fiber	http://amigo.geneontology.org/amigo/term/GO:0043292	-0.377562	-1.64751	0.00130124	0.021517	113	49	ENSG00000035403;ENSG00000054654;ENSG00000058272;ENSG00000058668;ENSG00000066027;ENSG00000068024;ENSG00000072110;ENSG00000073712;ENSG00000074695;ENSG00000074800;ENSG00000077157;ENSG00000089057;ENSG00000101605;ENSG00000107758;ENSG00000109063;ENSG00000110880;ENSG00000114166;ENSG00000114416;ENSG00000121350;ENSG00000122477;ENSG00000122786;ENSG00000130956;ENSG00000132912;ENSG00000133028;ENSG00000134775…
GO:0097223	sperm part	http://amigo.geneontology.org/amigo/term/GO:0097223	-0.391591	-1.6433	0.00344432	0.0216515	89	25	ENSG00000008294;ENSG00000028203;ENSG00000032742;ENSG00000036257;ENSG00000044115;ENSG00000049860;ENSG00000058668;ENSG00000068796;ENSG00000091140;ENSG00000096384;ENSG00000100815;ENSG00000102531;ENSG00000105792;ENSG00000118557;ENSG00000122545;ENSG00000125354;ENSG00000138587;ENSG00000140526;ENSG00000156313;ENSG00000161011;ENSG00000161800;ENSG00000163596;ENSG00000179218;ENSG00000185344;ENSG00000213949
GO:0001533	cornified envelope	http://amigo.geneontology.org/amigo/term/GO:0001533	-0.579017	-1.63676	0.0195398	0.0221679	15	5	ENSG00000046604;ENSG00000057294;ENSG00000096696;ENSG00000134755;ENSG00000144283
GO:0061695	transferase complex, transferring phosphorus-containing groups	http://amigo.geneontology.org/amigo/term/GO:0061695	-0.34198	-1.63287	0.000302526	0.0222092	216	68	ENSG00000006712;ENSG00000009413;ENSG00000011405;ENSG00000020426;ENSG00000023287;ENSG00000047315;ENSG00000051382;ENSG00000064313;ENSG00000067225;ENSG00000077514;ENSG00000078142;ENSG00000082805;ENSG00000090061;ENSG00000095637;ENSG00000100479;ENSG00000100603;ENSG00000101868;ENSG00000102893;ENSG00000104884;ENSG00000105176;ENSG00000105849;ENSG00000107443;ENSG00000108946;ENSG00000110768;ENSG00000112118…
GO:0072562	blood microparticle	http://amigo.geneontology.org/amigo/term/GO:0072562	-0.40741	-1.62858	0.0049429	0.0224096	67	30	ENSG00000000971;ENSG00000005421;ENSG00000047457;ENSG00000068400;ENSG00000072274;ENSG00000091513;ENSG00000109072;ENSG00000109971;ENSG00000117601;ENSG00000120885;ENSG00000122194;ENSG00000125730;ENSG00000135744;ENSG00000145321;ENSG00000148180;ENSG00000149131;ENSG00000163631;ENSG00000164111;ENSG00000171557;ENSG00000171560;ENSG00000171564;ENSG00000175899;ENSG00000178772;ENSG00000180210;ENSG00000182326…
GO:0034708	methyltransferase complex	http://amigo.geneontology.org/amigo/term/GO:0034708	-0.374895	-1.62513	0.00163026	0.0223951	108	44	ENSG00000001497;ENSG00000008083;ENSG00000055609;ENSG00000066135;ENSG00000073614;ENSG00000074266;ENSG00000084093;ENSG00000089195;ENSG00000096717;ENSG00000099381;ENSG00000100462;ENSG00000100888;ENSG00000101654;ENSG00000102054;ENSG00000105879;ENSG00000106462;ENSG00000107077;ENSG00000108395;ENSG00000111727;ENSG00000117222;ENSG00000118058;ENSG00000123200;ENSG00000124784;ENSG00000126012;ENSG00000129691…
GO:0099568	cytoplasmic region	http://amigo.geneontology.org/amigo/term/GO:0099568	-0.320814	-1.61256	0	0.0243778	341	115	ENSG00000007168;ENSG00000008086;ENSG00000039560;ENSG00000041353;ENSG00000047849;ENSG00000054523;ENSG00000065000;ENSG00000069869;ENSG00000070367;ENSG00000071127;ENSG00000073712;ENSG00000074800;ENSG00000075539;ENSG00000075945;ENSG00000078142;ENSG00000078246;ENSG00000078747;ENSG00000079819;ENSG00000090889;ENSG00000090989;ENSG00000099331;ENSG00000100644;ENSG00000100722;ENSG00000101350;ENSG00000102081…
GO:0098858	actin-based cell projection	http://amigo.geneontology.org/amigo/term/GO:0098858	-0.356895	-1.5944	0.00175916	0.0278279	132	53	ENSG00000006611;ENSG00000007062;ENSG00000007168;ENSG00000018189;ENSG00000023892;ENSG00000049130;ENSG00000054654;ENSG00000079385;ENSG00000081923;ENSG00000083857;ENSG00000091409;ENSG00000102081;ENSG00000114573;ENSG00000125124;ENSG00000128512;ENSG00000130830;ENSG00000131558;ENSG00000134853;ENSG00000136167;ENSG00000136754;ENSG00000137474;ENSG00000137710;ENSG00000142192;ENSG00000145703;ENSG00000145934…
GO:0044452	nucleolar part	http://amigo.geneontology.org/amigo/term/GO:0044452	-0.343518	-1.58329	0.00169805	0.0297235	159	53	ENSG00000011260;ENSG00000039560;ENSG00000055044;ENSG00000065183;ENSG00000065970;ENSG00000066135;ENSG00000070814;ENSG00000072364;ENSG00000083635;ENSG00000086200;ENSG00000100029;ENSG00000100129;ENSG00000101654;ENSG00000105849;ENSG00000107798;ENSG00000108312;ENSG00000108651;ENSG00000112144;ENSG00000115750;ENSG00000116030;ENSG00000117877;ENSG00000119285;ENSG00000121058;ENSG00000124383;ENSG00000125630…
GO:0016234	inclusion body	http://amigo.geneontology.org/amigo/term/GO:0016234	-0.403644	-1.58059	0.0097137	0.0295977	61	26	ENSG00000047410;ENSG00000054654;ENSG00000066427;ENSG00000070950;ENSG00000073921;ENSG00000085832;ENSG00000088930;ENSG00000096384;ENSG00000100225;ENSG00000104320;ENSG00000108395;ENSG00000120885;ENSG00000133302;ENSG00000134109;ENSG00000135018;ENSG00000146574;ENSG00000153201;ENSG00000161011;ENSG00000162231;ENSG00000162688;ENSG00000163625;ENSG00000166170;ENSG00000166233;ENSG00000183735;ENSG00000186908…
GO:0030427	site of polarized growth	http://amigo.geneontology.org/amigo/term/GO:0030427	-0.352126	-1.56609	0.0022325	0.0326175	123	44	ENSG00000003393;ENSG00000004478;ENSG00000007168;ENSG00000008086;ENSG00000018189;ENSG00000079805;ENSG00000080824;ENSG00000096384;ENSG00000099250;ENSG00000100503;ENSG00000100697;ENSG00000102081;ENSG00000106078;ENSG00000107290;ENSG00000110395;ENSG00000113657;ENSG00000116641;ENSG00000116852;ENSG00000119321;ENSG00000124486;ENSG00000125944;ENSG00000131558;ENSG00000133026;ENSG00000136754;ENSG00000138182…
GO:0045111	intermediate filament cytoskeleton	http://amigo.geneontology.org/amigo/term/GO:0045111	-0.385148	-1.55595	0.00947159	0.0345691	73	25	ENSG00000054654;ENSG00000057294;ENSG00000065243;ENSG00000080503;ENSG00000096696;ENSG00000099250;ENSG00000111057;ENSG00000116698;ENSG00000125864;ENSG00000128908;ENSG00000130779;ENSG00000132688;ENSG00000138587;ENSG00000139437;ENSG00000144824;ENSG00000146872;ENSG00000156261;ENSG00000157227;ENSG00000162408;ENSG00000162946;ENSG00000179335;ENSG00000182253;ENSG00000187231;ENSG00000197535;ENSG00000204843
GO:0042579	microbody	http://amigo.geneontology.org/amigo/term/GO:0042579	-0.352924	-1.54704	0.00504016	0.0363191	115	33	ENSG00000018510;ENSG00000023516;ENSG00000068366;ENSG00000078142;ENSG00000087008;ENSG00000087470;ENSG00000088888;ENSG00000102910;ENSG00000103150;ENSG00000107897;ENSG00000113790;ENSG00000116906;ENSG00000117528;ENSG00000119471;ENSG00000119673;ENSG00000120915;ENSG00000121691;ENSG00000123983;ENSG00000131373;ENSG00000133835;ENSG00000135241;ENSG00000138138;ENSG00000138413;ENSG00000139197;ENSG00000140284…
GO:0015629	actin cytoskeleton	http://amigo.geneontology.org/amigo/term/GO:0015629	-0.300376	-1.50831	0.000708818	0.0485843	340	99	ENSG00000005471;ENSG00000031691;ENSG00000044115;ENSG00000050327;ENSG00000050405;ENSG00000052841;ENSG00000058272;ENSG00000061676;ENSG00000066933;ENSG00000071127;ENSG00000072110;ENSG00000073712;ENSG00000079739;ENSG00000079819;ENSG00000087274;ENSG00000095637;ENSG00000099331;ENSG00000100592;ENSG00000101605;ENSG00000102024;ENSG00000106078;ENSG00000106299;ENSG00000107863;ENSG00000107957;ENSG00000109063…
GO:0048475	coated membrane	http://amigo.geneontology.org/amigo/term/GO:0048475	-0.358199	-1.50402	0.0150388	0.0491779	86	28	ENSG00000006715;ENSG00000073921;ENSG00000081014;ENSG00000085832;ENSG00000095139;ENSG00000100280;ENSG00000100934;ENSG00000101310;ENSG00000113615;ENSG00000119844;ENSG00000127527;ENSG00000127946;ENSG00000131374;ENSG00000132842;ENSG00000138674;ENSG00000138802;ENSG00000139719;ENSG00000149182;ENSG00000150961;ENSG00000151466;ENSG00000157107;ENSG00000159082;ENSG00000181789;ENSG00000184432;ENSG00000185009…
GO:0005743	mitochondrial inner membrane	http://amigo.geneontology.org/amigo/term/GO:0005743	0.298184	1.63215	0	0.0445538	409	156	ENSG00000004961;ENSG00000005022;ENSG00000013306;ENSG00000055950;ENSG00000060762;ENSG00000074071;ENSG00000074582;ENSG00000075415;ENSG00000086504;ENSG00000088682;ENSG00000089060;ENSG00000090266;ENSG00000096080;ENSG00000099624;ENSG00000099795;ENSG00000099800;ENSG00000100075;ENSG00000100116;ENSG00000100575;ENSG00000102078;ENSG00000102125;ENSG00000103202;ENSG00000105341;ENSG00000105364;ENSG00000108179…
GO:0070469	respiratory chain	http://amigo.geneontology.org/amigo/term/GO:0070469	0.373354	1.67295	0.000780843	0.0442389	91	43	ENSG00000074582;ENSG00000090266;ENSG00000099795;ENSG00000105341;ENSG00000110717;ENSG00000111775;ENSG00000115286;ENSG00000116288;ENSG00000119421;ENSG00000126267;ENSG00000127184;ENSG00000131143;ENSG00000131174;ENSG00000131495;ENSG00000135940;ENSG00000137038;ENSG00000139180;ENSG00000145335;ENSG00000146066;ENSG00000147123;ENSG00000147684;ENSG00000148290;ENSG00000155463;ENSG00000160194;ENSG00000164258…
GO:0005844	polysome	http://amigo.geneontology.org/amigo/term/GO:0005844	0.427727	1.80871	0.000249128	0.0212211	68	18	ENSG00000063177;ENSG00000071082;ENSG00000089009;ENSG00000105640;ENSG00000108298;ENSG00000114391;ENSG00000142676;ENSG00000144713;ENSG00000148303;ENSG00000149273;ENSG00000156482;ENSG00000161016;ENSG00000171858;ENSG00000172809;ENSG00000186468;ENSG00000198034;ENSG00000198755;ENSG00000213741
GO:0044445	cytosolic part	http://amigo.geneontology.org/amigo/term/GO:0044445	0.518004	2.63243	0	0	206	83	ENSG00000008988;ENSG00000063177;ENSG00000064012;ENSG00000071082;ENSG00000083845;ENSG00000089009;ENSG00000089157;ENSG00000102030;ENSG00000104518;ENSG00000105193;ENSG00000105372;ENSG00000105640;ENSG00000107130;ENSG00000107521;ENSG00000108107;ENSG00000108298;ENSG00000109475;ENSG00000110700;ENSG00000112306;ENSG00000113758;ENSG00000114391;ENSG00000115268;ENSG00000116251;ENSG00000118181;ENSG00000122026…
GO:0005840	ribosome	http://amigo.geneontology.org/amigo/term/GO:0005840	0.569352	2.91446	0	0	219	99	ENSG00000008988;ENSG00000055950;ENSG00000063177;ENSG00000071082;ENSG00000074071;ENSG00000083845;ENSG00000086504;ENSG00000089009;ENSG00000089157;ENSG00000100823;ENSG00000102030;ENSG00000102317;ENSG00000105193;ENSG00000105364;ENSG00000105372;ENSG00000105640;ENSG00000108107;ENSG00000108298;ENSG00000108826;ENSG00000109475;ENSG00000110700;ENSG00000112306;ENSG00000114391;ENSG00000115268;ENSG00000116251…
