# Supplementary material
Source: HighWire-hosted journal article supplement (doi:10.1101/rna.080097.124)
Supplement: Supplemental_TableS07.xlsx [file Supplemental_TableS07.xlsx]

## Sheet: GO_bp_common_categories
geneSet	description	normalizedEnrichmentScore_total	pValue_total	FDR_total	size_total	leadingEdgeNum_total	userId_total	normalizedEnrichmentScore_polysomes	pValue_polysomes	FDR_polysomes	size_polysomes	leadingEdgeNum_polysomes	userId_polysomes	CommonGenes_Total_Polysomes
GO:0006397	mRNA processing	-1.97203	0	0.0166235	449	197	ENSG00000004487;ENSG00000005075;ENSG00000011243;ENSG00000011304;ENSG00000014164;ENSG00000039123;ENSG00000060339;ENSG00000061936;ENSG00000064607;ENSG00000064703;ENSG00000067596;ENSG00000068394;ENSG00000070495;ENSG00000071626;ENSG00000071894;ENSG00000072062;ENSG00000075856;ENSG00000076924;ENSG00000079785;ENSG00000084463;ENSG00000085872;ENSG00000086589;ENSG00000087087;ENSG00000088247;ENSG00000091542…	-2.02083	0	0.00404226	438	133	ENSG00000004487;ENSG00000006712;ENSG00000011243;ENSG00000011304;ENSG00000020426;ENSG00000021776;ENSG00000033030;ENSG00000039123;ENSG00000047315;ENSG00000060339;ENSG00000061936;ENSG00000064703;ENSG00000068394;ENSG00000074356;ENSG00000075856;ENSG00000076650;ENSG00000079134;ENSG00000079785;ENSG00000082516;ENSG00000084093;ENSG00000084463;ENSG00000086589;ENSG00000087365;ENSG00000088930;ENSG00000089682…	58
GO:0006403	RNA localization	-1.82701	0	0.0323868	217	75	ENSG00000005007;ENSG00000011243;ENSG00000014164;ENSG00000030066;ENSG00000047410;ENSG00000055044;ENSG00000058804;ENSG00000069248;ENSG00000071894;ENSG00000087302;ENSG00000088247;ENSG00000093000;ENSG00000095319;ENSG00000100227;ENSG00000101146;ENSG00000102898;ENSG00000102900;ENSG00000108349;ENSG00000109111;ENSG00000111224;ENSG00000112110;ENSG00000112531;ENSG00000113569;ENSG00000115268;ENSG00000115484…	-2.19987	0	0.000605128	214	83	ENSG00000011243;ENSG00000047410;ENSG00000058729;ENSG00000069248;ENSG00000073792;ENSG00000074356;ENSG00000079134;ENSG00000082898;ENSG00000091009;ENSG00000093000;ENSG00000095319;ENSG00000100811;ENSG00000102900;ENSG00000108559;ENSG00000109111;ENSG00000111581;ENSG00000111605;ENSG00000113569;ENSG00000115484;ENSG00000116560;ENSG00000116698;ENSG00000116754;ENSG00000117174;ENSG00000119203;ENSG00000119392…	34
GO:0008380	RNA splicing	-2.01393	0	0.0175524	390	174	ENSG00000004487;ENSG00000005075;ENSG00000011243;ENSG00000011304;ENSG00000039123;ENSG00000060339;ENSG00000061936;ENSG00000064607;ENSG00000064703;ENSG00000067596;ENSG00000068394;ENSG00000070495;ENSG00000071626;ENSG00000071894;ENSG00000075292;ENSG00000075856;ENSG00000076924;ENSG00000079785;ENSG00000084463;ENSG00000085872;ENSG00000086589;ENSG00000087087;ENSG00000087302;ENSG00000088247;ENSG00000092199…	-1.82832	0	0.0149929	381	98	ENSG00000004487;ENSG00000011243;ENSG00000021776;ENSG00000047315;ENSG00000060339;ENSG00000061936;ENSG00000064703;ENSG00000068394;ENSG00000075856;ENSG00000076650;ENSG00000079134;ENSG00000079785;ENSG00000082516;ENSG00000084093;ENSG00000084463;ENSG00000087365;ENSG00000089682;ENSG00000096063;ENSG00000096401;ENSG00000099783;ENSG00000099995;ENSG00000100220;ENSG00000100462;ENSG00000100603;ENSG00000101343…	45
GO:0031503	protein-containing complex localization	-1.93088	0	0.0174792	248	101	ENSG00000004478;ENSG00000005007;ENSG00000006125;ENSG00000011243;ENSG00000014164;ENSG00000030066;ENSG00000033122;ENSG00000047410;ENSG00000058804;ENSG00000065000;ENSG00000069248;ENSG00000071894;ENSG00000075461;ENSG00000075945;ENSG00000079805;ENSG00000079950;ENSG00000079974;ENSG00000081870;ENSG00000088986;ENSG00000089685;ENSG00000092820;ENSG00000093000;ENSG00000095319;ENSG00000096872;ENSG00000100227…	-1.99005	0	0.0045644	235	91	ENSG00000004478;ENSG00000011243;ENSG00000030066;ENSG00000032742;ENSG00000047410;ENSG00000058729;ENSG00000068400;ENSG00000069248;ENSG00000069329;ENSG00000075711;ENSG00000078674;ENSG00000079134;ENSG00000079805;ENSG00000082898;ENSG00000083312;ENSG00000085832;ENSG00000090989;ENSG00000093000;ENSG00000095319;ENSG00000096872;ENSG00000100227;ENSG00000100815;ENSG00000101350;ENSG00000102900;ENSG00000103351…	37
GO:0070972	protein localization to endoplasmic reticulum	1.76973	0.000185185	0.0381953	132	68	ENSG00000008952;ENSG00000008988;ENSG00000058262;ENSG00000067167;ENSG00000071082;ENSG00000083845;ENSG00000089009;ENSG00000089157;ENSG00000100196;ENSG00000101558;ENSG00000105193;ENSG00000105372;ENSG00000105438;ENSG00000108107;ENSG00000109475;ENSG00000110700;ENSG00000114391;ENSG00000114850;ENSG00000114902;ENSG00000116251;ENSG00000118181;ENSG00000120341;ENSG00000122026;ENSG00000129128;ENSG00000134419…	3.1368	0	0	131	78	ENSG00000008988;ENSG00000063177;ENSG00000071082;ENSG00000083845;ENSG00000089009;ENSG00000089157;ENSG00000100417;ENSG00000105193;ENSG00000105372;ENSG00000105438;ENSG00000105640;ENSG00000108107;ENSG00000108298;ENSG00000109475;ENSG00000110700;ENSG00000112306;ENSG00000114391;ENSG00000115268;ENSG00000116251;ENSG00000118181;ENSG00000122026;ENSG00000122406;ENSG00000124614;ENSG00000125691;ENSG00000131469…	51
GO:0071166	ribonucleoprotein complex localization	-1.90517	0	0.0193176	123	46	ENSG00000005007;ENSG00000011243;ENSG00000014164;ENSG00000030066;ENSG00000047410;ENSG00000058804;ENSG00000069248;ENSG00000071894;ENSG00000093000;ENSG00000095319;ENSG00000100227;ENSG00000101146;ENSG00000102900;ENSG00000108349;ENSG00000109111;ENSG00000111581;ENSG00000113569;ENSG00000115268;ENSG00000116698;ENSG00000119392;ENSG00000120253;ENSG00000120533;ENSG00000123136;ENSG00000125450;ENSG00000126883…	-1.80923	0.000160875	0.0149697	122	40	ENSG00000011243;ENSG00000047410;ENSG00000058729;ENSG00000069248;ENSG00000079134;ENSG00000082898;ENSG00000093000;ENSG00000095319;ENSG00000102900;ENSG00000108559;ENSG00000109111;ENSG00000111581;ENSG00000116698;ENSG00000116754;ENSG00000119203;ENSG00000119392;ENSG00000125351;ENSG00000125450;ENSG00000125676;ENSG00000125755;ENSG00000133226;ENSG00000135521;ENSG00000136709;ENSG00000136937;ENSG00000138385…	19
GO:2000273	positive regulation of signaling receptor activity	-1.75222	0.00829876	0.0494115	23	8	ENSG00000075461;ENSG00000111832;ENSG00000125686;ENSG00000133216;ENSG00000142192;ENSG00000146918;ENSG00000184160;ENSG00000189056	-1.75711	0.00439883	0.0214634	20	7	ENSG00000124151;ENSG00000125686;ENSG00000142192;ENSG00000146918;ENSG00000147133;ENSG00000150093;ENSG00000151694	3
