# Supplementary material
Source: HighWire-hosted journal article supplement (doi:10.1101/rna.080097.124)
Supplement: Supplemental_TableS08.xlsx [file Supplemental_TableS08.xlsx]

## Sheet: DE_genes_with_editing
ensembl_gene_id	position_id	position_chrom	position_location	position_strand	editing_frequency	transcript_count	RNA_part	baseMean_total	log2FoldChange_total	lfcSE_total	stat_total	pvalue_total	padj_total	baseMean_polysomes	log2FoldChange_polysomes	lfcSE_polysomes	stat_polysomes	pvalue_polysomes	padj_polysomes
ENSG00000117620	1:100024279:100024279:1	1	100024279	1	15.2174	24	3'UTR (2), downstream (1)	2044.6	-0.152785	0.132081	-1.15675	0.247376	0.454648	1735.99	-0.26394	0.19058	-1.38493	0.166074	0.489331
ENSG00000117620	1:100024436:100024436:1	1	100024436	1	22.4138	24	3'UTR (2), downstream (1)	2044.6	-0.152785	0.132081	-1.15675	0.247376	0.454648	1735.99	-0.26394	0.19058	-1.38493	0.166074	0.489331
ENSG00000117620	1:100024440:100024440:1	1	100024440	1	74.1379	24	3'UTR (2), downstream (1)	2044.6	-0.152785	0.132081	-1.15675	0.247376	0.454648	1735.99	-0.26394	0.19058	-1.38493	0.166074	0.489331
ENSG00000117620	1:100024643:100024643:1	1	100024643	1	30	24	3'UTR (2), downstream (1)	2044.6	-0.152785	0.132081	-1.15675	0.247376	0.454648	1735.99	-0.26394	0.19058	-1.38493	0.166074	0.489331
ENSG00000117620	1:100024718:100024718:1	1	100024718	1	30	24	3'UTR (2), downstream (1)	2044.6	-0.152785	0.132081	-1.15675	0.247376	0.454648	1735.99	-0.26394	0.19058	-1.38493	0.166074	0.489331
ENSG00000117620	1:100024719:100024719:1	1	100024719	1	32.1429	24	3'UTR (2), downstream (1)	2044.6	-0.152785	0.132081	-1.15675	0.247376	0.454648	1735.99	-0.26394	0.19058	-1.38493	0.166074	0.489331
ENSG00000117620	1:100024736:100024736:1	1	100024736	1	17.5	24	3'UTR (2), downstream (1)	2044.6	-0.152785	0.132081	-1.15675	0.247376	0.454648	1735.99	-0.26394	0.19058	-1.38493	0.166074	0.489331
ENSG00000117620	1:100024747:100024747:1	1	100024747	1	60.9756	24	3'UTR (2), downstream (1)	2044.6	-0.152785	0.132081	-1.15675	0.247376	0.454648	1735.99	-0.26394	0.19058	-1.38493	0.166074	0.489331
ENSG00000122435	1:100145764:100145764:1	1	100145764	1	51.6129	5	intron (1)	1059.08	-0.172296	0.139445	-1.23559	0.216612	0.416969	1009.11	-0.117044	0.174772	-0.669696	0.503051	0.7805
ENSG00000122435	1:100145786:100145786:1	1	100145786	1	18.1818	5	intron (1)	1059.08	-0.172296	0.139445	-1.23559	0.216612	0.416969	1009.11	-0.117044	0.174772	-0.669696	0.503051	0.7805
ENSG00000122435	1:100145825:100145825:1	1	100145825	1	36.6667	5	intron (1)	1059.08	-0.172296	0.139445	-1.23559	0.216612	0.416969	1009.11	-0.117044	0.174772	-0.669696	0.503051	0.7805
ENSG00000122435	1:100145828:100145828:1	1	100145828	1	25	5	intron (1)	1059.08	-0.172296	0.139445	-1.23559	0.216612	0.416969	1009.11	-0.117044	0.174772	-0.669696	0.503051	0.7805
ENSG00000137992	1:100189217:100189217:-1	1	100189217	-1	20	2	3'UTR (1)	2788.39	0.0133924	0.141959	0.0943402	0.924839	0.964542	2166.62	-0.749537	0.155478	-4.82085	1.42945e-06	0.000353152
ENSG00000137992	1:100189257:100189257:-1	1	100189257	-1	23.0769	2	3'UTR (1)	2788.39	0.0133924	0.141959	0.0943402	0.924839	0.964542	2166.62	-0.749537	0.155478	-4.82085	1.42945e-06	0.000353152
ENSG00000137992	1:100189277:100189277:-1	1	100189277	-1	25	2	3'UTR (1)	2788.39	0.0133924	0.141959	0.0943402	0.924839	0.964542	2166.62	-0.749537	0.155478	-4.82085	1.42945e-06	0.000353152
ENSG00000137992	1:100189278:100189278:-1	1	100189278	-1	18.5185	2	3'UTR (1)	2788.39	0.0133924	0.141959	0.0943402	0.924839	0.964542	2166.62	-0.749537	0.155478	-4.82085	1.42945e-06	0.000353152
ENSG00000137992	1:100189283:100189283:-1	1	100189283	-1	18.5185	2	3'UTR (1)	2788.39	0.0133924	0.141959	0.0943402	0.924839	0.964542	2166.62	-0.749537	0.155478	-4.82085	1.42945e-06	0.000353152
ENSG00000233184	1:101075557:101075557:1	1	101075557	1	11.9048	6	exon (1)	993.31	0.012389	0.117986	0.105004	0.916373	0.960297	1516.42	0.23771	0.150413	1.58038	0.114019	0.411868
ENSG00000233184	1:101075597:101075597:1	1	101075597	1	32	6	exon (1)	993.31	0.012389	0.117986	0.105004	0.916373	0.960297	1516.42	0.23771	0.150413	1.58038	0.114019	0.411868
ENSG00000233184	1:101075608:101075608:1	1	101075608	1	9.61538	6	exon (1)	993.31	0.012389	0.117986	0.105004	0.916373	0.960297	1516.42	0.23771	0.150413	1.58038	0.114019	0.411868
ENSG00000233184	1:101075613:101075613:1	1	101075613	1	11.6667	6	exon (1)	993.31	0.012389	0.117986	0.105004	0.916373	0.960297	1516.42	0.23771	0.150413	1.58038	0.114019	0.411868
ENSG00000233184	1:101075614:101075614:1	1	101075614	1	16.129	6	exon (1)	993.31	0.012389	0.117986	0.105004	0.916373	0.960297	1516.42	0.23771	0.150413	1.58038	0.114019	0.411868
ENSG00000233184	1:101075616:101075616:1	1	101075616	1	39.6552	6	exon (1)	993.31	0.012389	0.117986	0.105004	0.916373	0.960297	1516.42	0.23771	0.150413	1.58038	0.114019	0.411868
ENSG00000233184	1:101076682:101076682:1	1	101076682	1	36.3636	6	intron (1)	993.31	0.012389	0.117986	0.105004	0.916373	0.960297	1516.42	0.23771	0.150413	1.58038	0.114019	0.411868
ENSG00000233184	1:101076684:101076684:1	1	101076684	1	57.1429	6	intron (1)	993.31	0.012389	0.117986	0.105004	0.916373	0.960297	1516.42	0.23771	0.150413	1.58038	0.114019	0.411868
ENSG00000118733	1:101933164:101933164:-1	1	101933164	-1	27.2727	6	intron (2), upstream (2)	1195.73	1.12176	0.123804	9.06076	1.29549e-19	1.09142e-17	2133.99	-0.154727	0.17043	-0.907861	0.363952	0.682934
ENSG00000160049	1:10457219:10457219:-1	1	10457219	-1	18.0328	3	3'UTR (1), downstream (1)	5530.81	0.0412022	0.120669	0.341447	0.732767	0.857689	5150.89	-0.284495	0.223214	-1.27454	0.202472	0.535295
ENSG00000160049	1:10457233:10457233:-1	1	10457233	-1	8.62069	3	3'UTR (1), downstream (1)	5530.81	0.0412022	0.120669	0.341447	0.732767	0.857689	5150.89	-0.284495	0.223214	-1.27454	0.202472	0.535295
ENSG00000160049	1:10457243:10457243:-1	1	10457243	-1	11.8644	3	3'UTR (1), downstream (1)	5530.81	0.0412022	0.120669	0.341447	0.732767	0.857689	5150.89	-0.284495	0.223214	-1.27454	0.202472	0.535295
ENSG00000160049	1:10457256:10457256:-1	1	10457256	-1	14.5161	3	3'UTR (1), downstream (1)	5530.81	0.0412022	0.120669	0.341447	0.732767	0.857689	5150.89	-0.284495	0.223214	-1.27454	0.202472	0.535295
ENSG00000160049	1:10457295:10457295:-1	1	10457295	-1	10.5263	3	3'UTR (1), downstream (1)	5530.81	0.0412022	0.120669	0.341447	0.732767	0.857689	5150.89	-0.284495	0.223214	-1.27454	0.202472	0.535295
ENSG00000160049	1:10457428:10457428:-1	1	10457428	-1	13.2075	3	3'UTR (1), downstream (1)	5530.81	0.0412022	0.120669	0.341447	0.732767	0.857689	5150.89	-0.284495	0.223214	-1.27454	0.202472	0.535295
ENSG00000160049	1:10457447:10457447:-1	1	10457447	-1	13.8889	3	3'UTR (1), downstream (1)	5530.81	0.0412022	0.120669	0.341447	0.732767	0.857689	5150.89	-0.284495	0.223214	-1.27454	0.202472	0.535295
ENSG00000160049	1:10457451:10457451:-1	1	10457451	-1	11.4286	3	3'UTR (1), downstream (1)	5530.81	0.0412022	0.120669	0.341447	0.732767	0.857689	5150.89	-0.284495	0.223214	-1.27454	0.202472	0.535295
ENSG00000160049	1:10457507:10457507:-1	1	10457507	-1	46	3	3'UTR (1), downstream (1)	5530.81	0.0412022	0.120669	0.341447	0.732767	0.857689	5150.89	-0.284495	0.223214	-1.27454	0.202472	0.535295
ENSG00000160049	1:10457510:10457510:-1	1	10457510	-1	38.1818	3	3'UTR (1), downstream (1)	5530.81	0.0412022	0.120669	0.341447	0.732767	0.857689	5150.89	-0.284495	0.223214	-1.27454	0.202472	0.535295
ENSG00000160049	1:10457556:10457556:-1	1	10457556	-1	54.717	3	3'UTR (1), downstream (1)	5530.81	0.0412022	0.120669	0.341447	0.732767	0.857689	5150.89	-0.284495	0.223214	-1.27454	0.202472	0.535295
ENSG00000160049	1:10457566:10457566:-1	1	10457566	-1	26.5306	3	3'UTR (1), downstream (1)	5530.81	0.0412022	0.120669	0.341447	0.732767	0.857689	5150.89	-0.284495	0.223214	-1.27454	0.202472	0.535295
ENSG00000160049	1:10457596:10457596:-1	1	10457596	-1	37.2549	3	3'UTR (1), downstream (1)	5530.81	0.0412022	0.120669	0.341447	0.732767	0.857689	5150.89	-0.284495	0.223214	-1.27454	0.202472	0.535295
ENSG00000160049	1:10457602:10457602:-1	1	10457602	-1	11.5385	3	3'UTR (1), downstream (1)	5530.81	0.0412022	0.120669	0.341447	0.732767	0.857689	5150.89	-0.284495	0.223214	-1.27454	0.202472	0.535295
ENSG00000160049	1:10457631:10457631:-1	1	10457631	-1	8.62069	3	3'UTR (1), downstream (1)	5530.81	0.0412022	0.120669	0.341447	0.732767	0.857689	5150.89	-0.284495	0.223214	-1.27454	0.202472	0.535295
ENSG00000160049	1:10457634:10457634:-1	1	10457634	-1	9.09091	3	3'UTR (1), downstream (1)	5530.81	0.0412022	0.120669	0.341447	0.732767	0.857689	5150.89	-0.284495	0.223214	-1.27454	0.202472	0.535295
ENSG00000160049	1:10457935:10457935:-1	1	10457935	-1	8.41121	3	3'UTR (1), downstream (1)	5530.81	0.0412022	0.120669	0.341447	0.732767	0.857689	5150.89	-0.284495	0.223214	-1.27454	0.202472	0.535295
ENSG00000160049	1:10457941:10457941:-1	1	10457941	-1	5.21739	3	3'UTR (1), downstream (1)	5530.81	0.0412022	0.120669	0.341447	0.732767	0.857689	5150.89	-0.284495	0.223214	-1.27454	0.202472	0.535295
ENSG00000160049	1:10457980:10457980:-1	1	10457980	-1	11.3208	3	3'UTR (1), downstream (1)	5530.81	0.0412022	0.120669	0.341447	0.732767	0.857689	5150.89	-0.284495	0.223214	-1.27454	0.202472	0.535295
ENSG00000160049	1:10457995:10457995:-1	1	10457995	-1	7.47664	3	3'UTR (1), downstream (1)	5530.81	0.0412022	0.120669	0.341447	0.732767	0.857689	5150.89	-0.284495	0.223214	-1.27454	0.202472	0.535295
ENSG00000160049	1:10458699:10458699:-1	1	10458699	-1	6.75676	3	3'UTR (1), downstream (1)	5530.81	0.0412022	0.120669	0.341447	0.732767	0.857689	5150.89	-0.284495	0.223214	-1.27454	0.202472	0.535295
ENSG00000160049	1:10458764:10458764:-1	1	10458764	-1	11.5385	3	3'UTR (1), downstream (1)	5530.81	0.0412022	0.120669	0.341447	0.732767	0.857689	5150.89	-0.284495	0.223214	-1.27454	0.202472	0.535295
ENSG00000160049	1:10458787:10458787:-1	1	10458787	-1	13.1579	3	3'UTR (1), downstream (1)	5530.81	0.0412022	0.120669	0.341447	0.732767	0.857689	5150.89	-0.284495	0.223214	-1.27454	0.202472	0.535295
ENSG00000160049	1:10458816:10458816:-1	1	10458816	-1	9.09091	3	3'UTR (1), downstream (1)	5530.81	0.0412022	0.120669	0.341447	0.732767	0.857689	5150.89	-0.284495	0.223214	-1.27454	0.202472	0.535295
ENSG00000160049	1:10459007:10459007:-1	1	10459007	-1	12.5	3	3'UTR (1), downstream (1)	5530.81	0.0412022	0.120669	0.341447	0.732767	0.857689	5150.89	-0.284495	0.223214	-1.27454	0.202472	0.535295
ENSG00000160049	1:10459133:10459133:-1	1	10459133	-1	14.6341	3	3'UTR (1), downstream (1)	5530.81	0.0412022	0.120669	0.341447	0.732767	0.857689	5150.89	-0.284495	0.223214	-1.27454	0.202472	0.535295
ENSG00000160049	1:10459855:10459855:-1	1	10459855	-1	9.67742	3	3'UTR (1), downstream (1)	5530.81	0.0412022	0.120669	0.341447	0.732767	0.857689	5150.89	-0.284495	0.223214	-1.27454	0.202472	0.535295
ENSG00000160049	1:10459879:10459879:-1	1	10459879	-1	18.4615	3	3'UTR (1), downstream (1)	5530.81	0.0412022	0.120669	0.341447	0.732767	0.857689	5150.89	-0.284495	0.223214	-1.27454	0.202472	0.535295
ENSG00000160049	1:10459889:10459889:-1	1	10459889	-1	10.6061	3	3'UTR (1), downstream (1)	5530.81	0.0412022	0.120669	0.341447	0.732767	0.857689	5150.89	-0.284495	0.223214	-1.27454	0.202472	0.535295
ENSG00000160049	1:10459890:10459890:-1	1	10459890	-1	7.69231	3	3'UTR (1), downstream (1)	5530.81	0.0412022	0.120669	0.341447	0.732767	0.857689	5150.89	-0.284495	0.223214	-1.27454	0.202472	0.535295
ENSG00000160049	1:10459918:10459918:-1	1	10459918	-1	7.57576	3	3'UTR (1), downstream (1)	5530.81	0.0412022	0.120669	0.341447	0.732767	0.857689	5150.89	-0.284495	0.223214	-1.27454	0.202472	0.535295
ENSG00000160049	1:10459925:10459925:-1	1	10459925	-1	13.1148	3	3'UTR (1), downstream (1)	5530.81	0.0412022	0.120669	0.341447	0.732767	0.857689	5150.89	-0.284495	0.223214	-1.27454	0.202472	0.535295
ENSG00000160049	1:10460088:10460088:-1	1	10460088	-1	33.3333	3	3'UTR (1), downstream (1)	5530.81	0.0412022	0.120669	0.341447	0.732767	0.857689	5150.89	-0.284495	0.223214	-1.27454	0.202472	0.535295
ENSG00000160049	1:10460097:10460097:-1	1	10460097	-1	27.5862	3	3'UTR (1), downstream (1)	5530.81	0.0412022	0.120669	0.341447	0.732767	0.857689	5150.89	-0.284495	0.223214	-1.27454	0.202472	0.535295
ENSG00000160049	1:10460117:10460117:-1	1	10460117	-1	15.2542	3	3'UTR (1), downstream (1)	5530.81	0.0412022	0.120669	0.341447	0.732767	0.857689	5150.89	-0.284495	0.223214	-1.27454	0.202472	0.535295
ENSG00000160049	1:10460121:10460121:-1	1	10460121	-1	13.5593	3	3'UTR (1), downstream (1)	5530.81	0.0412022	0.120669	0.341447	0.732767	0.857689	5150.89	-0.284495	0.223214	-1.27454	0.202472	0.535295
ENSG00000160049	1:10460133:10460133:-1	1	10460133	-1	25	3	3'UTR (1), downstream (1)	5530.81	0.0412022	0.120669	0.341447	0.732767	0.857689	5150.89	-0.284495	0.223214	-1.27454	0.202472	0.535295
ENSG00000160049	1:10460162:10460162:-1	1	10460162	-1	15.8537	3	3'UTR (1), downstream (1)	5530.81	0.0412022	0.120669	0.341447	0.732767	0.857689	5150.89	-0.284495	0.223214	-1.27454	0.202472	0.535295
ENSG00000160049	1:10460169:10460169:-1	1	10460169	-1	9.63855	3	3'UTR (1), downstream (1)	5530.81	0.0412022	0.120669	0.341447	0.732767	0.857689	5150.89	-0.284495	0.223214	-1.27454	0.202472	0.535295
ENSG00000160049	1:10460176:10460176:-1	1	10460176	-1	8.79121	3	3'UTR (1), downstream (1)	5530.81	0.0412022	0.120669	0.341447	0.732767	0.857689	5150.89	-0.284495	0.223214	-1.27454	0.202472	0.535295
ENSG00000160049	1:10460201:10460201:-1	1	10460201	-1	54.6875	3	3'UTR (1), downstream (1)	5530.81	0.0412022	0.120669	0.341447	0.732767	0.857689	5150.89	-0.284495	0.223214	-1.27454	0.202472	0.535295
ENSG00000160049	1:10460239:10460239:-1	1	10460239	-1	37.5	3	3'UTR (1), downstream (1)	5530.81	0.0412022	0.120669	0.341447	0.732767	0.857689	5150.89	-0.284495	0.223214	-1.27454	0.202472	0.535295
ENSG00000160049	1:10460321:10460321:-1	1	10460321	-1	45.9016	3	3'UTR (1), downstream (1)	5530.81	0.0412022	0.120669	0.341447	0.732767	0.857689	5150.89	-0.284495	0.223214	-1.27454	0.202472	0.535295
ENSG00000160049	1:10460326:10460326:-1	1	10460326	-1	12.1622	3	3'UTR (1), downstream (1)	5530.81	0.0412022	0.120669	0.341447	0.732767	0.857689	5150.89	-0.284495	0.223214	-1.27454	0.202472	0.535295
ENSG00000160049	1:10460382:10460382:-1	1	10460382	-1	14.7368	3	3'UTR (1), downstream (1)	5530.81	0.0412022	0.120669	0.341447	0.732767	0.857689	5150.89	-0.284495	0.223214	-1.27454	0.202472	0.535295
ENSG00000160049	1:10460393:10460393:-1	1	10460393	-1	9.67742	3	3'UTR (1), downstream (1)	5530.81	0.0412022	0.120669	0.341447	0.732767	0.857689	5150.89	-0.284495	0.223214	-1.27454	0.202472	0.535295
ENSG00000160049	1:10460402:10460402:-1	1	10460402	-1	10.7527	3	3'UTR (1), downstream (1)	5530.81	0.0412022	0.120669	0.341447	0.732767	0.857689	5150.89	-0.284495	0.223214	-1.27454	0.202472	0.535295
ENSG00000160049	1:10460408:10460408:-1	1	10460408	-1	6.81818	3	3'UTR (1), downstream (1)	5530.81	0.0412022	0.120669	0.341447	0.732767	0.857689	5150.89	-0.284495	0.223214	-1.27454	0.202472	0.535295
ENSG00000160049	1:10460430:10460430:-1	1	10460430	-1	12.6761	3	3'UTR (1), downstream (1)	5530.81	0.0412022	0.120669	0.341447	0.732767	0.857689	5150.89	-0.284495	0.223214	-1.27454	0.202472	0.535295
ENSG00000160049	1:10460475:10460475:-1	1	10460475	-1	10.6667	3	3'UTR (1), downstream (1)	5530.81	0.0412022	0.120669	0.341447	0.732767	0.857689	5150.89	-0.284495	0.223214	-1.27454	0.202472	0.535295
ENSG00000160049	1:10460658:10460658:-1	1	10460658	-1	21.2766	3	3'UTR (1), downstream (1)	5530.81	0.0412022	0.120669	0.341447	0.732767	0.857689	5150.89	-0.284495	0.223214	-1.27454	0.202472	0.535295
ENSG00000160049	1:10460668:10460668:-1	1	10460668	-1	16.3265	3	3'UTR (1), downstream (1)	5530.81	0.0412022	0.120669	0.341447	0.732767	0.857689	5150.89	-0.284495	0.223214	-1.27454	0.202472	0.535295
ENSG00000160049	1:10460710:10460710:-1	1	10460710	-1	13.7255	3	3'UTR (1), downstream (1)	5530.81	0.0412022	0.120669	0.341447	0.732767	0.857689	5150.89	-0.284495	0.223214	-1.27454	0.202472	0.535295
ENSG00000160049	1:10460762:10460762:-1	1	10460762	-1	20	3	3'UTR (1), downstream (1)	5530.81	0.0412022	0.120669	0.341447	0.732767	0.857689	5150.89	-0.284495	0.223214	-1.27454	0.202472	0.535295
ENSG00000160049	1:10461073:10461073:-1	1	10461073	-1	9.80392	3	3'UTR (1), downstream (1)	5530.81	0.0412022	0.120669	0.341447	0.732767	0.857689	5150.89	-0.284495	0.223214	-1.27454	0.202472	0.535295
ENSG00000160049	1:10461113:10461113:-1	1	10461113	-1	23.7288	3	3'UTR (1), downstream (1)	5530.81	0.0412022	0.120669	0.341447	0.732767	0.857689	5150.89	-0.284495	0.223214	-1.27454	0.202472	0.535295
ENSG00000160049	1:10461115:10461115:-1	1	10461115	-1	8.62069	3	3'UTR (1), downstream (1)	5530.81	0.0412022	0.120669	0.341447	0.732767	0.857689	5150.89	-0.284495	0.223214	-1.27454	0.202472	0.535295
ENSG00000160049	1:10461180:10461180:-1	1	10461180	-1	11.4943	3	3'UTR (1), downstream (1)	5530.81	0.0412022	0.120669	0.341447	0.732767	0.857689	5150.89	-0.284495	0.223214	-1.27454	0.202472	0.535295
ENSG00000160049	1:10461181:10461181:-1	1	10461181	-1	20	3	3'UTR (1), downstream (1)	5530.81	0.0412022	0.120669	0.341447	0.732767	0.857689	5150.89	-0.284495	0.223214	-1.27454	0.202472	0.535295
ENSG00000160049	1:10461197:10461197:-1	1	10461197	-1	10.5882	3	3'UTR (1), downstream (1)	5530.81	0.0412022	0.120669	0.341447	0.732767	0.857689	5150.89	-0.284495	0.223214	-1.27454	0.202472	0.535295
ENSG00000160049	1:10461203:10461203:-1	1	10461203	-1	7.52688	3	3'UTR (1), downstream (1)	5530.81	0.0412022	0.120669	0.341447	0.732767	0.857689	5150.89	-0.284495	0.223214	-1.27454	0.202472	0.535295
ENSG00000121940	1:108932152:108932152:-1	1	108932152	-1	6.45161	9	3'UTR (4)	4270.1	-0.0795219	0.112954	-0.704017	0.481422	0.681396	2765.45	-0.192574	0.178635	-1.07803	0.281021	0.613127
ENSG00000121957	1:108932153:108932153:1	1	108932153	1	22.2222	12	3'UTR (1), downstream (1)	1942.44	-0.174827	0.133058	-1.31392	0.188873	0.381695	2044.45	-0.0766356	0.2053	-0.373286	0.708936	0.890473
ENSG00000121940	1:108933009:108933009:-1	1	108933009	-1	30	9	intron (4)	4270.1	-0.0795219	0.112954	-0.704017	0.481422	0.681396	2765.45	-0.192574	0.178635	-1.07803	0.281021	0.613127
ENSG00000121940	1:108933013:108933013:-1	1	108933013	-1	45.1613	9	intron (4)	4270.1	-0.0795219	0.112954	-0.704017	0.481422	0.681396	2765.45	-0.192574	0.178635	-1.07803	0.281021	0.613127
ENSG00000121940	1:108933019:108933019:-1	1	108933019	-1	45.4545	9	intron (4)	4270.1	-0.0795219	0.112954	-0.704017	0.481422	0.681396	2765.45	-0.192574	0.178635	-1.07803	0.281021	0.613127
ENSG00000121957	1:108933020:108933020:1	1	108933020	1	63.1579	12	3'UTR (1), downstream (1)	1942.44	-0.174827	0.133058	-1.31392	0.188873	0.381695	2044.45	-0.0766356	0.2053	-0.373286	0.708936	0.890473
ENSG00000197780	1:109063550:109063550:-1	1	109063550	-1	13.1148	2	downstream (1)	1183.25	-0.0749144	0.169734	-0.441365	0.658949	0.810404	2137.62	-0.0355964	0.273429	-0.130185	0.89642	0.960818
ENSG00000197780	1:109063551:109063551:-1	1	109063551	-1	9.52381	2	downstream (1)	1183.25	-0.0749144	0.169734	-0.441365	0.658949	0.810404	2137.62	-0.0355964	0.273429	-0.130185	0.89642	0.960818
ENSG00000197780	1:109063570:109063570:-1	1	109063570	-1	8.82353	2	downstream (1)	1183.25	-0.0749144	0.169734	-0.441365	0.658949	0.810404	2137.62	-0.0355964	0.273429	-0.130185	0.89642	0.960818
ENSG00000197780	1:109063609:109063609:-1	1	109063609	-1	13.7615	2	downstream (1)	1183.25	-0.0749144	0.169734	-0.441365	0.658949	0.810404	2137.62	-0.0355964	0.273429	-0.130185	0.89642	0.960818
ENSG00000197780	1:109063610:109063610:-1	1	109063610	-1	8.10811	2	downstream (1)	1183.25	-0.0749144	0.169734	-0.441365	0.658949	0.810404	2137.62	-0.0355964	0.273429	-0.130185	0.89642	0.960818
ENSG00000197780	1:109063617:109063617:-1	1	109063617	-1	7.07071	2	downstream (1)	1183.25	-0.0749144	0.169734	-0.441365	0.658949	0.810404	2137.62	-0.0355964	0.273429	-0.130185	0.89642	0.960818
ENSG00000197780	1:109063618:109063618:-1	1	109063618	-1	5.20833	2	downstream (1)	1183.25	-0.0749144	0.169734	-0.441365	0.658949	0.810404	2137.62	-0.0355964	0.273429	-0.130185	0.89642	0.960818
ENSG00000197780	1:109063620:109063620:-1	1	109063620	-1	6.06061	2	downstream (1)	1183.25	-0.0749144	0.169734	-0.441365	0.658949	0.810404	2137.62	-0.0355964	0.273429	-0.130185	0.89642	0.960818
ENSG00000197780	1:109063621:109063621:-1	1	109063621	-1	10.989	2	downstream (1)	1183.25	-0.0749144	0.169734	-0.441365	0.658949	0.810404	2137.62	-0.0355964	0.273429	-0.130185	0.89642	0.960818
ENSG00000197780	1:109063714:109063714:-1	1	109063714	-1	8.33333	2	downstream (1)	1183.25	-0.0749144	0.169734	-0.441365	0.658949	0.810404	2137.62	-0.0355964	0.273429	-0.130185	0.89642	0.960818
ENSG00000197780	1:109063715:109063715:-1	1	109063715	-1	14.7059	2	downstream (1)	1183.25	-0.0749144	0.169734	-0.441365	0.658949	0.810404	2137.62	-0.0355964	0.273429	-0.130185	0.89642	0.960818
ENSG00000197780	1:109063721:109063721:-1	1	109063721	-1	9.375	2	downstream (1)	1183.25	-0.0749144	0.169734	-0.441365	0.658949	0.810404	2137.62	-0.0355964	0.273429	-0.130185	0.89642	0.960818
ENSG00000143106	1:109402870:109402870:-1	1	109402870	-1	15.9091	6	intron (2)	9367.48	-0.271237	0.10642	-2.54873	0.0108117	0.046689	9138.87	0.21781	0.210384	1.0353	0.300529	0.633621
ENSG00000143106	1:109403544:109403544:-1	1	109403544	-1	29.1667	6	intron (2)	9367.48	-0.271237	0.10642	-2.54873	0.0108117	0.046689	9138.87	0.21781	0.210384	1.0353	0.300529	0.633621
ENSG00000143106	1:109403547:109403547:-1	1	109403547	-1	29.1667	6	intron (2)	9367.48	-0.271237	0.10642	-2.54873	0.0108117	0.046689	9138.87	0.21781	0.210384	1.0353	0.300529	0.633621
ENSG00000143106	1:109403548:109403548:-1	1	109403548	-1	41.6667	6	intron (2)	9367.48	-0.271237	0.10642	-2.54873	0.0108117	0.046689	9138.87	0.21781	0.210384	1.0353	0.300529	0.633621
ENSG00000143106	1:109404106:109404106:-1	1	109404106	-1	26.6667	6	intron (2)	9367.48	-0.271237	0.10642	-2.54873	0.0108117	0.046689	9138.87	0.21781	0.210384	1.0353	0.300529	0.633621
ENSG00000143106	1:109404107:109404107:-1	1	109404107	-1	30.9524	6	intron (2)	9367.48	-0.271237	0.10642	-2.54873	0.0108117	0.046689	9138.87	0.21781	0.210384	1.0353	0.300529	0.633621
ENSG00000143106	1:109406576:109406576:-1	1	109406576	-1	20.6897	6	intron (2)	9367.48	-0.271237	0.10642	-2.54873	0.0108117	0.046689	9138.87	0.21781	0.210384	1.0353	0.300529	0.633621
ENSG00000143106	1:109407259:109407259:-1	1	109407259	-1	36.1702	6	intron (2)	9367.48	-0.271237	0.10642	-2.54873	0.0108117	0.046689	9138.87	0.21781	0.210384	1.0353	0.300529	0.633621
ENSG00000143106	1:109407806:109407806:-1	1	109407806	-1	17.1429	6	intron (2)	9367.48	-0.271237	0.10642	-2.54873	0.0108117	0.046689	9138.87	0.21781	0.210384	1.0353	0.300529	0.633621
ENSG00000143106	1:109409429:109409429:-1	1	109409429	-1	50	6	intron (2)	9367.48	-0.271237	0.10642	-2.54873	0.0108117	0.046689	9138.87	0.21781	0.210384	1.0353	0.300529	0.633621
ENSG00000143106	1:109409711:109409711:-1	1	109409711	-1	17.3913	6	intron (2)	9367.48	-0.271237	0.10642	-2.54873	0.0108117	0.046689	9138.87	0.21781	0.210384	1.0353	0.300529	0.633621
ENSG00000143106	1:109409792:109409792:-1	1	109409792	-1	22.7273	6	intron (2)	9367.48	-0.271237	0.10642	-2.54873	0.0108117	0.046689	9138.87	0.21781	0.210384	1.0353	0.300529	0.633621
ENSG00000120948	1:11021239:11021239:1	1	11021239	1	20	32	intron (1)	8050.7	-0.114949	0.106337	-1.08099	0.279702	0.492887	4782.52	0.28171	0.225316	1.25029	0.211194	0.54651
ENSG00000120948	1:11021268:11021268:1	1	11021268	1	23.3333	32	intron (1)	8050.7	-0.114949	0.106337	-1.08099	0.279702	0.492887	4782.52	0.28171	0.225316	1.25029	0.211194	0.54651
ENSG00000120948	1:11021885:11021885:1	1	11021885	1	29.7297	32	intron (1)	8050.7	-0.114949	0.106337	-1.08099	0.279702	0.492887	4782.52	0.28171	0.225316	1.25029	0.211194	0.54651
ENSG00000224699	1:110360326:110360326:1	1	110360326	1	26.6667	51	upstream (1)	207.294	-0.0921666	0.184889	-0.498497	0.618134	0.786031	354.258	0.160156	0.225244	0.711033	0.477064	0.762961
ENSG00000224699	1:110367872:110367872:1	1	110367872	1	12.1212	51	upstream (1)	207.294	-0.0921666	0.184889	-0.498497	0.618134	0.786031	354.258	0.160156	0.225244	0.711033	0.477064	0.762961
ENSG00000224699	1:110369538:110369538:1	1	110369538	1	25.8065	51	upstream (1)	207.294	-0.0921666	0.184889	-0.498497	0.618134	0.786031	354.258	0.160156	0.225244	0.711033	0.477064	0.762961
intergenic	1:11298061:11298061:1	1	11298061	1	23.8095	NA	0	NA	NA	NA	NA	NA	NA	NA	NA	NA	NA	NA	NA
intergenic	1:11298068:11298068:1	1	11298068	1	25	NA	0	NA	NA	NA	NA	NA	NA	NA	NA	NA	NA	NA	NA
ENSG00000198799	1:113129994:113129994:1	1	113129994	1	20	5	3'UTR (1)	1729.58	-0.16122	0.122406	-1.3171	0.187807	0.380209	1249.47	0.0867699	0.244087	0.355488	0.722224	0.8953
ENSG00000198799	1:113130000:113130000:1	1	113130000	1	21.0526	5	3'UTR (1)	1729.58	-0.16122	0.122406	-1.3171	0.187807	0.380209	1249.47	0.0867699	0.244087	0.355488	0.722224	0.8953
ENSG00000116793	1:113748251:113748251:-1	1	113748251	-1	10.5263	12	intron (4)	2757.9	0.0195497	0.110808	0.176428	0.859957	0.931413	2646.96	-0.0580514	0.170372	-0.340733	0.733304	0.900162
ENSG00000231365	1:119150872:119150872:1	1	119150872	1	12.1212	6	exon (1), intron (3)	597.743	0.399327	0.129354	3.08708	0.0020213	0.011942	698.246	-0.248345	0.165067	-1.50451	0.13245	0.444769
ENSG00000078808	1:1221498:1221498:-1	1	1221498	-1	36.1702	7	intron (2)	6507.09	-0.0256224	0.148236	-0.172849	0.86277	0.933285	6070.26	0.0853654	0.255028	0.33473	0.737829	0.902153
ENSG00000127054	1:1316160:1316160:-1	1	1316160	-1	10.1695	50	intron (5)	3685.01	-0.0524911	0.159867	-0.328343	0.742652	0.863973	2151.4	0.164016	0.293478	0.558871	0.57625	0.824426
ENSG00000127054	1:1316230:1316230:-1	1	1316230	-1	8.77193	50	intron (5)	3685.01	-0.0524911	0.159867	-0.328343	0.742652	0.863973	2151.4	0.164016	0.293478	0.558871	0.57625	0.824426
ENSG00000127054	1:1316251:1316251:-1	1	1316251	-1	11.5385	50	intron (5)	3685.01	-0.0524911	0.159867	-0.328343	0.742652	0.863973	2151.4	0.164016	0.293478	0.558871	0.57625	0.824426
intergenic	1:1316450:1316450:1	1	1316450	1	10.5263	NA	0	NA	NA	NA	NA	NA	NA	NA	NA	NA	NA	NA	NA
ENSG00000127054	1:1317061:1317061:-1	1	1317061	-1	79.4118	50	intron (5)	3685.01	-0.0524911	0.159867	-0.328343	0.742652	0.863973	2151.4	0.164016	0.293478	0.558871	0.57625	0.824426
ENSG00000127054	1:1317063:1317063:-1	1	1317063	-1	45.7143	50	intron (5)	3685.01	-0.0524911	0.159867	-0.328343	0.742652	0.863973	2151.4	0.164016	0.293478	0.558871	0.57625	0.824426
ENSG00000127054	1:1317088:1317088:-1	1	1317088	-1	18.4211	50	intron (5)	3685.01	-0.0524911	0.159867	-0.328343	0.742652	0.863973	2151.4	0.164016	0.293478	0.558871	0.57625	0.824426
intergenic	1:1317300:1317300:1	1	1317300	1	19.2308	NA	0	NA	NA	NA	NA	NA	NA	NA	NA	NA	NA	NA	NA
ENSG00000127054	1:1317343:1317343:-1	1	1317343	-1	11.5385	50	intron (5)	3685.01	-0.0524911	0.159867	-0.328343	0.742652	0.863973	2151.4	0.164016	0.293478	0.558871	0.57625	0.824426
ENSG00000127054	1:1318564:1318564:-1	1	1318564	-1	41.8605	50	intron (5)	3685.01	-0.0524911	0.159867	-0.328343	0.742652	0.863973	2151.4	0.164016	0.293478	0.558871	0.57625	0.824426
ENSG00000127054	1:1318576:1318576:-1	1	1318576	-1	14.2857	50	intron (5)	3685.01	-0.0524911	0.159867	-0.328343	0.742652	0.863973	2151.4	0.164016	0.293478	0.558871	0.57625	0.824426
ENSG00000127054	1:1318636:1318636:-1	1	1318636	-1	52.6316	50	intron (5)	3685.01	-0.0524911	0.159867	-0.328343	0.742652	0.863973	2151.4	0.164016	0.293478	0.558871	0.57625	0.824426
intergenic	1:1408874:1408874:1	1	1408874	1	23.0769	NA	0	NA	NA	NA	NA	NA	NA	NA	NA	NA	NA	NA	NA
intergenic	1:1408875:1408875:1	1	1408875	1	52	NA	0	NA	NA	NA	NA	NA	NA	NA	NA	NA	NA	NA	NA
ENSG00000265491	1:145745519:145745519:-1	1	145745519	-1	67.7419	2	3'UTR (1)	1845.99	-0.355172	0.13023	-2.72727	0.00638603	0.0306229	1986.5	0.000135671	0.1949	0.000696105	0.999445	0.99974
ENSG00000265491	1:145745521:145745521:-1	1	145745521	-1	58.0645	2	3'UTR (1)	1845.99	-0.355172	0.13023	-2.72727	0.00638603	0.0306229	1986.5	0.000135671	0.1949	0.000696105	0.999445	0.99974
ENSG00000265491	1:145745550:145745550:-1	1	145745550	-1	32.3529	2	3'UTR (1)	1845.99	-0.355172	0.13023	-2.72727	0.00638603	0.0306229	1986.5	0.000135671	0.1949	0.000696105	0.999445	0.99974
ENSG00000265491	1:145745554:145745554:-1	1	145745554	-1	45.4545	2	3'UTR (1)	1845.99	-0.355172	0.13023	-2.72727	0.00638603	0.0306229	1986.5	0.000135671	0.1949	0.000696105	0.999445	0.99974
ENSG00000265491	1:145745596:145745596:-1	1	145745596	-1	26.3158	2	3'UTR (1)	1845.99	-0.355172	0.13023	-2.72727	0.00638603	0.0306229	1986.5	0.000135671	0.1949	0.000696105	0.999445	0.99974
ENSG00000265491	1:145746037:145746037:-1	1	145746037	-1	40	2	3'UTR (1)	1845.99	-0.355172	0.13023	-2.72727	0.00638603	0.0306229	1986.5	0.000135671	0.1949	0.000696105	0.999445	0.99974
ENSG00000265491	1:145746059:145746059:-1	1	145746059	-1	40	2	3'UTR (1)	1845.99	-0.355172	0.13023	-2.72727	0.00638603	0.0306229	1986.5	0.000135671	0.1949	0.000696105	0.999445	0.99974
ENSG00000265491	1:145746062:145746062:-1	1	145746062	-1	19.0476	2	3'UTR (1)	1845.99	-0.355172	0.13023	-2.72727	0.00638603	0.0306229	1986.5	0.000135671	0.1949	0.000696105	0.999445	0.99974
ENSG00000265491	1:145746104:145746104:-1	1	145746104	-1	20.3125	2	3'UTR (1)	1845.99	-0.355172	0.13023	-2.72727	0.00638603	0.0306229	1986.5	0.000135671	0.1949	0.000696105	0.999445	0.99974
ENSG00000265491	1:145746114:145746114:-1	1	145746114	-1	12.8571	2	3'UTR (1)	1845.99	-0.355172	0.13023	-2.72727	0.00638603	0.0306229	1986.5	0.000135671	0.1949	0.000696105	0.999445	0.99974
ENSG00000265491	1:145746126:145746126:-1	1	145746126	-1	8.4507	2	3'UTR (1)	1845.99	-0.355172	0.13023	-2.72727	0.00638603	0.0306229	1986.5	0.000135671	0.1949	0.000696105	0.999445	0.99974
ENSG00000265491	1:145746143:145746143:-1	1	145746143	-1	17.3077	2	3'UTR (1)	1845.99	-0.355172	0.13023	-2.72727	0.00638603	0.0306229	1986.5	0.000135671	0.1949	0.000696105	0.999445	0.99974
ENSG00000265491	1:145746144:145746144:-1	1	145746144	-1	9.25926	2	3'UTR (1)	1845.99	-0.355172	0.13023	-2.72727	0.00638603	0.0306229	1986.5	0.000135671	0.1949	0.000696105	0.999445	0.99974
ENSG00000265241	1:145921967:145921967:-1	1	145921967	-1	8.47458	9	3'UTR (1)	5923.42	-0.921553	0.102011	-9.03385	1.6573e-19	1.38355e-17	8022.84	0.281631	0.173891	1.61959	0.105321	0.39389
ENSG00000265241	1:145921978:145921978:-1	1	145921978	-1	35.2941	9	3'UTR (1)	5923.42	-0.921553	0.102011	-9.03385	1.6573e-19	1.38355e-17	8022.84	0.281631	0.173891	1.61959	0.105321	0.39389
ENSG00000265241	1:145921979:145921979:-1	1	145921979	-1	22.3881	9	3'UTR (1)	5923.42	-0.921553	0.102011	-9.03385	1.6573e-19	1.38355e-17	8022.84	0.281631	0.173891	1.61959	0.105321	0.39389
ENSG00000265241	1:145921980:145921980:-1	1	145921980	-1	27.9412	9	3'UTR (1)	5923.42	-0.921553	0.102011	-9.03385	1.6573e-19	1.38355e-17	8022.84	0.281631	0.173891	1.61959	0.105321	0.39389
ENSG00000265241	1:145921994:145921994:-1	1	145921994	-1	20	9	3'UTR (1)	5923.42	-0.921553	0.102011	-9.03385	1.6573e-19	1.38355e-17	8022.84	0.281631	0.173891	1.61959	0.105321	0.39389
ENSG00000265241	1:145921998:145921998:-1	1	145921998	-1	36.5854	9	3'UTR (1)	5923.42	-0.921553	0.102011	-9.03385	1.6573e-19	1.38355e-17	8022.84	0.281631	0.173891	1.61959	0.105321	0.39389
ENSG00000265241	1:145922002:145922002:-1	1	145922002	-1	8.33333	9	3'UTR (1)	5923.42	-0.921553	0.102011	-9.03385	1.6573e-19	1.38355e-17	8022.84	0.281631	0.173891	1.61959	0.105321	0.39389
ENSG00000265241	1:145922058:145922058:-1	1	145922058	-1	7.69231	9	3'UTR (1)	5923.42	-0.921553	0.102011	-9.03385	1.6573e-19	1.38355e-17	8022.84	0.281631	0.173891	1.61959	0.105321	0.39389
ENSG00000265241	1:145922075:145922075:-1	1	145922075	-1	37.037	9	3'UTR (1)	5923.42	-0.921553	0.102011	-9.03385	1.6573e-19	1.38355e-17	8022.84	0.281631	0.173891	1.61959	0.105321	0.39389
ENSG00000265241	1:145922076:145922076:-1	1	145922076	-1	40.8163	9	3'UTR (1)	5923.42	-0.921553	0.102011	-9.03385	1.6573e-19	1.38355e-17	8022.84	0.281631	0.173891	1.61959	0.105321	0.39389
ENSG00000265241	1:145922137:145922137:-1	1	145922137	-1	10.2041	9	3'UTR (1)	5923.42	-0.921553	0.102011	-9.03385	1.6573e-19	1.38355e-17	8022.84	0.281631	0.173891	1.61959	0.105321	0.39389
ENSG00000265241	1:145922141:145922141:-1	1	145922141	-1	76.7442	9	3'UTR (1)	5923.42	-0.921553	0.102011	-9.03385	1.6573e-19	1.38355e-17	8022.84	0.281631	0.173891	1.61959	0.105321	0.39389
ENSG00000265241	1:145922142:145922142:-1	1	145922142	-1	55.814	9	3'UTR (1)	5923.42	-0.921553	0.102011	-9.03385	1.6573e-19	1.38355e-17	8022.84	0.281631	0.173891	1.61959	0.105321	0.39389
ENSG00000265241	1:145922148:145922148:-1	1	145922148	-1	83.7209	9	3'UTR (1)	5923.42	-0.921553	0.102011	-9.03385	1.6573e-19	1.38355e-17	8022.84	0.281631	0.173891	1.61959	0.105321	0.39389
ENSG00000265241	1:145922162:145922162:-1	1	145922162	-1	51.2821	9	3'UTR (1)	5923.42	-0.921553	0.102011	-9.03385	1.6573e-19	1.38355e-17	8022.84	0.281631	0.173891	1.61959	0.105321	0.39389
ENSG00000265241	1:145922167:145922167:-1	1	145922167	-1	18.1818	9	3'UTR (1)	5923.42	-0.921553	0.102011	-9.03385	1.6573e-19	1.38355e-17	8022.84	0.281631	0.173891	1.61959	0.105321	0.39389
ENSG00000265241	1:145923068:145923068:-1	1	145923068	-1	20.8333	9	3'UTR (1)	5923.42	-0.921553	0.102011	-9.03385	1.6573e-19	1.38355e-17	8022.84	0.281631	0.173891	1.61959	0.105321	0.39389
ENSG00000265241	1:145923098:145923098:-1	1	145923098	-1	8.57143	9	3'UTR (1)	5923.42	-0.921553	0.102011	-9.03385	1.6573e-19	1.38355e-17	8022.84	0.281631	0.173891	1.61959	0.105321	0.39389
ENSG00000265241	1:145923101:145923101:-1	1	145923101	-1	10.4478	9	3'UTR (1)	5923.42	-0.921553	0.102011	-9.03385	1.6573e-19	1.38355e-17	8022.84	0.281631	0.173891	1.61959	0.105321	0.39389
ENSG00000265241	1:145923108:145923108:-1	1	145923108	-1	11.4754	9	3'UTR (1)	5923.42	-0.921553	0.102011	-9.03385	1.6573e-19	1.38355e-17	8022.84	0.281631	0.173891	1.61959	0.105321	0.39389
ENSG00000265241	1:145923109:145923109:-1	1	145923109	-1	9.23077	9	3'UTR (1)	5923.42	-0.921553	0.102011	-9.03385	1.6573e-19	1.38355e-17	8022.84	0.281631	0.173891	1.61959	0.105321	0.39389
ENSG00000265241	1:145923124:145923124:-1	1	145923124	-1	13.7931	9	3'UTR (1)	5923.42	-0.921553	0.102011	-9.03385	1.6573e-19	1.38355e-17	8022.84	0.281631	0.173891	1.61959	0.105321	0.39389
ENSG00000265241	1:145923134:145923134:-1	1	145923134	-1	11.3208	9	3'UTR (1)	5923.42	-0.921553	0.102011	-9.03385	1.6573e-19	1.38355e-17	8022.84	0.281631	0.173891	1.61959	0.105321	0.39389
ENSG00000265241	1:145923163:145923163:-1	1	145923163	-1	25	9	3'UTR (1)	5923.42	-0.921553	0.102011	-9.03385	1.6573e-19	1.38355e-17	8022.84	0.281631	0.173891	1.61959	0.105321	0.39389
ENSG00000160072	1:1483150:1483150:1	1	1483150	1	15.873	5	intron (1)	3348.26	-0.286188	0.333867	-0.85719	0.39134	0.605097	2234.25	0.450989	0.304757	1.47983	0.138919	0.454312
ENSG00000160072	1:1483151:1483151:1	1	1483151	1	11.4754	5	intron (1)	3348.26	-0.286188	0.333867	-0.85719	0.39134	0.605097	2234.25	0.450989	0.304757	1.47983	0.138919	0.454312
ENSG00000160072	1:1483152:1483152:1	1	1483152	1	11.1111	5	intron (1)	3348.26	-0.286188	0.333867	-0.85719	0.39134	0.605097	2234.25	0.450989	0.304757	1.47983	0.138919	0.454312
ENSG00000160072	1:1483156:1483156:1	1	1483156	1	23.4375	5	intron (1)	3348.26	-0.286188	0.333867	-0.85719	0.39134	0.605097	2234.25	0.450989	0.304757	1.47983	0.138919	0.454312
ENSG00000160072	1:1483586:1483586:1	1	1483586	1	10.7692	5	intron (1)	3348.26	-0.286188	0.333867	-0.85719	0.39134	0.605097	2234.25	0.450989	0.304757	1.47983	0.138919	0.454312
ENSG00000160072	1:1483597:1483597:1	1	1483597	1	16.6667	5	intron (1)	3348.26	-0.286188	0.333867	-0.85719	0.39134	0.605097	2234.25	0.450989	0.304757	1.47983	0.138919	0.454312
ENSG00000160072	1:1483607:1483607:1	1	1483607	1	8.19672	5	intron (1)	3348.26	-0.286188	0.333867	-0.85719	0.39134	0.605097	2234.25	0.450989	0.304757	1.47983	0.138919	0.454312
ENSG00000160072	1:1483680:1483680:1	1	1483680	1	35.7143	5	intron (1)	3348.26	-0.286188	0.333867	-0.85719	0.39134	0.605097	2234.25	0.450989	0.304757	1.47983	0.138919	0.454312
ENSG00000160072	1:1483681:1483681:1	1	1483681	1	62.2642	5	intron (1)	3348.26	-0.286188	0.333867	-0.85719	0.39134	0.605097	2234.25	0.450989	0.304757	1.47983	0.138919	0.454312
ENSG00000160072	1:1483750:1483750:1	1	1483750	1	18.9189	5	intron (1)	3348.26	-0.286188	0.333867	-0.85719	0.39134	0.605097	2234.25	0.450989	0.304757	1.47983	0.138919	0.454312
ENSG00000160072	1:1484298:1484298:1	1	1484298	1	11.3208	5	intron (1)	3348.26	-0.286188	0.333867	-0.85719	0.39134	0.605097	2234.25	0.450989	0.304757	1.47983	0.138919	0.454312
ENSG00000160072	1:1484310:1484310:1	1	1484310	1	38.2979	5	intron (1)	3348.26	-0.286188	0.333867	-0.85719	0.39134	0.605097	2234.25	0.450989	0.304757	1.47983	0.138919	0.454312
ENSG00000160072	1:1484320:1484320:1	1	1484320	1	34.0909	5	intron (1)	3348.26	-0.286188	0.333867	-0.85719	0.39134	0.605097	2234.25	0.450989	0.304757	1.47983	0.138919	0.454312
ENSG00000160072	1:1484363:1484363:1	1	1484363	1	17.7419	5	intron (1)	3348.26	-0.286188	0.333867	-0.85719	0.39134	0.605097	2234.25	0.450989	0.304757	1.47983	0.138919	0.454312
ENSG00000160072	1:1484366:1484366:1	1	1484366	1	56.0606	5	intron (1)	3348.26	-0.286188	0.333867	-0.85719	0.39134	0.605097	2234.25	0.450989	0.304757	1.47983	0.138919	0.454312
ENSG00000160072	1:1484455:1484455:1	1	1484455	1	11.6279	5	intron (1)	3348.26	-0.286188	0.333867	-0.85719	0.39134	0.605097	2234.25	0.450989	0.304757	1.47983	0.138919	0.454312
ENSG00000160072	1:1484508:1484508:1	1	1484508	1	13.2075	5	intron (1)	3348.26	-0.286188	0.333867	-0.85719	0.39134	0.605097	2234.25	0.450989	0.304757	1.47983	0.138919	0.454312
ENSG00000269713	1:149054842:149054842:-1	1	149054842	-1	40.5797	9	3'UTR (2)	842.87	-0.646257	0.138715	-4.6589	3.17908e-06	4.51562e-05	611.15	-0.152848	0.206456	-0.740346	0.45909	0.752925
ENSG00000269713	1:149054857:149054857:-1	1	149054857	-1	26.3158	9	3'UTR (2)	842.87	-0.646257	0.138715	-4.6589	3.17908e-06	4.51562e-05	611.15	-0.152848	0.206456	-0.740346	0.45909	0.752925
ENSG00000269713	1:149054860:149054860:-1	1	149054860	-1	35.1852	9	3'UTR (2)	842.87	-0.646257	0.138715	-4.6589	3.17908e-06	4.51562e-05	611.15	-0.152848	0.206456	-0.740346	0.45909	0.752925
ENSG00000117360	1:150347006:150347006:1	1	150347006	1	30	7	intron (1)	3557.06	-0.804658	0.117531	-6.84634	7.57639e-12	2.94182e-10	2379.09	-0.0919142	0.213444	-0.430625	0.666741	0.871861
ENSG00000143420	1:150613174:150613174:-1	1	150613174	-1	20	15	downstream (8)	5137.48	-0.316919	0.102864	-3.08094	0.00206348	0.0121468	10178.5	0.290746	0.1756	1.65573	0.0977763	0.378493
ENSG00000143420	1:150613178:150613178:-1	1	150613178	-1	55.5556	15	downstream (8)	5137.48	-0.316919	0.102864	-3.08094	0.00206348	0.0121468	10178.5	0.290746	0.1756	1.65573	0.0977763	0.378493
ENSG00000143420	1:150613179:150613179:-1	1	150613179	-1	21.7391	15	downstream (8)	5137.48	-0.316919	0.102864	-3.08094	0.00206348	0.0121468	10178.5	0.290746	0.1756	1.65573	0.0977763	0.378493
ENSG00000143420	1:150613192:150613192:-1	1	150613192	-1	27.7778	15	downstream (8)	5137.48	-0.316919	0.102864	-3.08094	0.00206348	0.0121468	10178.5	0.290746	0.1756	1.65573	0.0977763	0.378493
ENSG00000143420	1:150613214:150613214:-1	1	150613214	-1	25	15	downstream (8)	5137.48	-0.316919	0.102864	-3.08094	0.00206348	0.0121468	10178.5	0.290746	0.1756	1.65573	0.0977763	0.378493
ENSG00000143420	1:150617914:150617914:-1	1	150617914	-1	25.9259	15	downstream (8)	5137.48	-0.316919	0.102864	-3.08094	0.00206348	0.0121468	10178.5	0.290746	0.1756	1.65573	0.0977763	0.378493
ENSG00000143420	1:150617918:150617918:-1	1	150617918	-1	29.6296	15	downstream (8)	5137.48	-0.316919	0.102864	-3.08094	0.00206348	0.0121468	10178.5	0.290746	0.1756	1.65573	0.0977763	0.378493
ENSG00000143420	1:150619110:150619110:-1	1	150619110	-1	18.5185	15	downstream (8)	5137.48	-0.316919	0.102864	-3.08094	0.00206348	0.0121468	10178.5	0.290746	0.1756	1.65573	0.0977763	0.378493
ENSG00000143420	1:150620917:150620917:-1	1	150620917	-1	20	15	downstream (8)	5137.48	-0.316919	0.102864	-3.08094	0.00206348	0.0121468	10178.5	0.290746	0.1756	1.65573	0.0977763	0.378493
ENSG00000143420	1:150620954:150620954:-1	1	150620954	-1	17.3913	15	downstream (8)	5137.48	-0.316919	0.102864	-3.08094	0.00206348	0.0121468	10178.5	0.290746	0.1756	1.65573	0.0977763	0.378493
intergenic	1:150993488:150993488:-1	1	150993488	-1	18.5185	NA	0	NA	NA	NA	NA	NA	NA	NA	NA	NA	NA	NA	NA
ENSG00000160679	1:153639957:153639957:1	1	153639957	1	12.3288	7	intron (4)	7173.48	-0.429864	0.104745	-4.10391	4.06225e-05	0.000433008	6407.74	0.0449046	0.190238	0.236044	0.813398	0.934394
ENSG00000160679	1:153640651:153640651:1	1	153640651	1	44.4444	7	intron (4)	7173.48	-0.429864	0.104745	-4.10391	4.06225e-05	0.000433008	6407.74	0.0449046	0.190238	0.236044	0.813398	0.934394
ENSG00000160679	1:153640656:153640656:1	1	153640656	1	17.0213	7	intron (4)	7173.48	-0.429864	0.104745	-4.10391	4.06225e-05	0.000433008	6407.74	0.0449046	0.190238	0.236044	0.813398	0.934394
ENSG00000160679	1:153640720:153640720:1	1	153640720	1	19.5122	7	intron (4)	7173.48	-0.429864	0.104745	-4.10391	4.06225e-05	0.000433008	6407.74	0.0449046	0.190238	0.236044	0.813398	0.934394
ENSG00000160691	1:154964665:154964665:-1	1	154964665	-1	15.1515	11	intron (4)	3889.32	0.108608	0.109816	0.988997	0.322665	0.537226	3325.15	0.27093	0.166033	1.63179	0.102725	0.389035
ENSG00000160691	1:154964693:154964693:-1	1	154964693	-1	41.3793	11	intron (4)	3889.32	0.108608	0.109816	0.988997	0.322665	0.537226	3325.15	0.27093	0.166033	1.63179	0.102725	0.389035
ENSG00000163463	1:155170929:155170929:-1	1	155170929	-1	34.4828	10	intron (1)	621.475	-0.172513	0.141917	-1.21559	0.224141	0.425983	245.307	0.522845	0.645939	0.809433	0.418266	0.726256
ENSG00000163463	1:155170947:155170947:-1	1	155170947	-1	11.6279	10	intron (1)	621.475	-0.172513	0.141917	-1.21559	0.224141	0.425983	245.307	0.522845	0.645939	0.809433	0.418266	0.726256
ENSG00000163463	1:155170977:155170977:-1	1	155170977	-1	12.766	10	intron (1)	621.475	-0.172513	0.141917	-1.21559	0.224141	0.425983	245.307	0.522845	0.645939	0.809433	0.418266	0.726256
ENSG00000163463	1:155171083:155171083:-1	1	155171083	-1	22.2222	10	intron (1)	621.475	-0.172513	0.141917	-1.21559	0.224141	0.425983	245.307	0.522845	0.645939	0.809433	0.418266	0.726256
ENSG00000163463	1:155171193:155171193:-1	1	155171193	-1	31.5789	10	intron (1)	621.475	-0.172513	0.141917	-1.21559	0.224141	0.425983	245.307	0.522845	0.645939	0.809433	0.418266	0.726256
ENSG00000163463	1:155171236:155171236:-1	1	155171236	-1	38.4615	10	intron (1)	621.475	-0.172513	0.141917	-1.21559	0.224141	0.425983	245.307	0.522845	0.645939	0.809433	0.418266	0.726256
ENSG00000163463	1:155171336:155171336:-1	1	155171336	-1	21.0526	10	intron (1)	621.475	-0.172513	0.141917	-1.21559	0.224141	0.425983	245.307	0.522845	0.645939	0.809433	0.418266	0.726256
ENSG00000163463	1:155171343:155171343:-1	1	155171343	-1	27.5862	10	intron (1)	621.475	-0.172513	0.141917	-1.21559	0.224141	0.425983	245.307	0.522845	0.645939	0.809433	0.418266	0.726256
ENSG00000163463	1:155171383:155171383:-1	1	155171383	-1	43.4783	10	intron (1)	621.475	-0.172513	0.141917	-1.21559	0.224141	0.425983	245.307	0.522845	0.645939	0.809433	0.418266	0.726256
ENSG00000160766	1:155220602:155220602:-1	1	155220602	-1	27.7778	8	upstream (1)	567.143	-0.204682	0.151559	-1.35052	0.17685	0.366099	346.043	0.418145	0.202958	2.06026	0.0393737	0.238249
ENSG00000160766	1:155221505:155221505:-1	1	155221505	-1	21.4286	8	upstream (1)	567.143	-0.204682	0.151559	-1.35052	0.17685	0.366099	346.043	0.418145	0.202958	2.06026	0.0393737	0.238249
ENSG00000160766	1:155221557:155221557:-1	1	155221557	-1	22.2222	8	upstream (1)	567.143	-0.204682	0.151559	-1.35052	0.17685	0.366099	346.043	0.418145	0.202958	2.06026	0.0393737	0.238249
ENSG00000160766	1:155221574:155221574:-1	1	155221574	-1	26.087	8	upstream (1)	567.143	-0.204682	0.151559	-1.35052	0.17685	0.366099	346.043	0.418145	0.202958	2.06026	0.0393737	0.238249
ENSG00000160766	1:155222170:155222170:-1	1	155222170	-1	50	8	upstream (1)	567.143	-0.204682	0.151559	-1.35052	0.17685	0.366099	346.043	0.418145	0.202958	2.06026	0.0393737	0.238249
ENSG00000160766	1:155223690:155223690:-1	1	155223690	-1	26.087	8	upstream (1)	567.143	-0.204682	0.151559	-1.35052	0.17685	0.366099	346.043	0.418145	0.202958	2.06026	0.0393737	0.238249
ENSG00000160766	1:155223706:155223706:-1	1	155223706	-1	38.0952	8	upstream (1)	567.143	-0.204682	0.151559	-1.35052	0.17685	0.366099	346.043	0.418145	0.202958	2.06026	0.0393737	0.238249
ENSG00000160766	1:155223811:155223811:-1	1	155223811	-1	20	8	upstream (1)	567.143	-0.204682	0.151559	-1.35052	0.17685	0.366099	346.043	0.418145	0.202958	2.06026	0.0393737	0.238249
ENSG00000160766	1:155223819:155223819:-1	1	155223819	-1	62.5	8	upstream (1)	567.143	-0.204682	0.151559	-1.35052	0.17685	0.366099	346.043	0.418145	0.202958	2.06026	0.0393737	0.238249
ENSG00000160766	1:155224120:155224120:-1	1	155224120	-1	18.5185	8	upstream (1)	567.143	-0.204682	0.151559	-1.35052	0.17685	0.366099	346.043	0.418145	0.202958	2.06026	0.0393737	0.238249
ENSG00000160766	1:155224124:155224124:-1	1	155224124	-1	29.1667	8	upstream (1)	567.143	-0.204682	0.151559	-1.35052	0.17685	0.366099	346.043	0.418145	0.202958	2.06026	0.0393737	0.238249
ENSG00000160766	1:155224126:155224126:-1	1	155224126	-1	19.2308	8	upstream (1)	567.143	-0.204682	0.151559	-1.35052	0.17685	0.366099	346.043	0.418145	0.202958	2.06026	0.0393737	0.238249
ENSG00000160766	1:155224132:155224132:-1	1	155224132	-1	23.8095	8	upstream (1)	567.143	-0.204682	0.151559	-1.35052	0.17685	0.366099	346.043	0.418145	0.202958	2.06026	0.0393737	0.238249
ENSG00000160766	1:155224133:155224133:-1	1	155224133	-1	21.7391	8	upstream (1)	567.143	-0.204682	0.151559	-1.35052	0.17685	0.366099	346.043	0.418145	0.202958	2.06026	0.0393737	0.238249
ENSG00000160752	1:155312803:155312803:1	1	155312803	1	9.70874	21	intron (4)	44181.2	0.23261	0.101002	2.30302	0.021278	0.0785853	37602.6	0.319072	0.184961	1.72508	0.0845137	0.352704
ENSG00000160752	1:155312804:155312804:1	1	155312804	1	5.71429	21	intron (4)	44181.2	0.23261	0.101002	2.30302	0.021278	0.0785853	37602.6	0.319072	0.184961	1.72508	0.0845137	0.352704
ENSG00000160752	1:155312868:155312868:1	1	155312868	1	13.6364	21	intron (4)	44181.2	0.23261	0.101002	2.30302	0.021278	0.0785853	37602.6	0.319072	0.184961	1.72508	0.0845137	0.352704
ENSG00000160752	1:155312900:155312900:1	1	155312900	1	7.8125	21	intron (4)	44181.2	0.23261	0.101002	2.30302	0.021278	0.0785853	37602.6	0.319072	0.184961	1.72508	0.0845137	0.352704
ENSG00000160752	1:155313993:155313993:1	1	155313993	1	17.6471	21	intron (4)	44181.2	0.23261	0.101002	2.30302	0.021278	0.0785853	37602.6	0.319072	0.184961	1.72508	0.0845137	0.352704
ENSG00000160752	1:155314002:155314002:1	1	155314002	1	34.2105	21	intron (4)	44181.2	0.23261	0.101002	2.30302	0.021278	0.0785853	37602.6	0.319072	0.184961	1.72508	0.0845137	0.352704
ENSG00000160752	1:155314016:155314016:1	1	155314016	1	17.0213	21	intron (4)	44181.2	0.23261	0.101002	2.30302	0.021278	0.0785853	37602.6	0.319072	0.184961	1.72508	0.0845137	0.352704
ENSG00000160752	1:155314019:155314019:1	1	155314019	1	9.43396	21	intron (4)	44181.2	0.23261	0.101002	2.30302	0.021278	0.0785853	37602.6	0.319072	0.184961	1.72508	0.0845137	0.352704
ENSG00000160752	1:155314078:155314078:1	1	155314078	1	7.77778	21	intron (4)	44181.2	0.23261	0.101002	2.30302	0.021278	0.0785853	37602.6	0.319072	0.184961	1.72508	0.0845137	0.352704
ENSG00000160752	1:155314614:155314614:1	1	155314614	1	6.55738	21	intron (4)	44181.2	0.23261	0.101002	2.30302	0.021278	0.0785853	37602.6	0.319072	0.184961	1.72508	0.0845137	0.352704
ENSG00000160752	1:155314711:155314711:1	1	155314711	1	7.14286	21	intron (4)	44181.2	0.23261	0.101002	2.30302	0.021278	0.0785853	37602.6	0.319072	0.184961	1.72508	0.0845137	0.352704
ENSG00000160752	1:155315262:155315262:1	1	155315262	1	10.5691	21	intron (4)	44181.2	0.23261	0.101002	2.30302	0.021278	0.0785853	37602.6	0.319072	0.184961	1.72508	0.0845137	0.352704
ENSG00000160752	1:155315289:155315289:1	1	155315289	1	5.88235	21	intron (4)	44181.2	0.23261	0.101002	2.30302	0.021278	0.0785853	37602.6	0.319072	0.184961	1.72508	0.0845137	0.352704
ENSG00000160752	1:155315298:155315298:1	1	155315298	1	6.66667	21	intron (4)	44181.2	0.23261	0.101002	2.30302	0.021278	0.0785853	37602.6	0.319072	0.184961	1.72508	0.0845137	0.352704
ENSG00000160752	1:155315359:155315359:1	1	155315359	1	7.14286	21	intron (4)	44181.2	0.23261	0.101002	2.30302	0.021278	0.0785853	37602.6	0.319072	0.184961	1.72508	0.0845137	0.352704
ENSG00000160752	1:155315361:155315361:1	1	155315361	1	7.21649	21	intron (4)	44181.2	0.23261	0.101002	2.30302	0.021278	0.0785853	37602.6	0.319072	0.184961	1.72508	0.0845137	0.352704
ENSG00000160752	1:155315425:155315425:1	1	155315425	1	8.13953	21	intron (4)	44181.2	0.23261	0.101002	2.30302	0.021278	0.0785853	37602.6	0.319072	0.184961	1.72508	0.0845137	0.352704
ENSG00000160752	1:155315494:155315494:1	1	155315494	1	9.58904	21	intron (4)	44181.2	0.23261	0.101002	2.30302	0.021278	0.0785853	37602.6	0.319072	0.184961	1.72508	0.0845137	0.352704
ENSG00000160752	1:155315562:155315562:1	1	155315562	1	7.6087	21	intron (4)	44181.2	0.23261	0.101002	2.30302	0.021278	0.0785853	37602.6	0.319072	0.184961	1.72508	0.0845137	0.352704
ENSG00000160752	1:155315589:155315589:1	1	155315589	1	7.40741	21	intron (4)	44181.2	0.23261	0.101002	2.30302	0.021278	0.0785853	37602.6	0.319072	0.184961	1.72508	0.0845137	0.352704
ENSG00000160752	1:155315746:155315746:1	1	155315746	1	7.33945	21	intron (4)	44181.2	0.23261	0.101002	2.30302	0.021278	0.0785853	37602.6	0.319072	0.184961	1.72508	0.0845137	0.352704
ENSG00000160752	1:155315747:155315747:1	1	155315747	1	5.66038	21	intron (4)	44181.2	0.23261	0.101002	2.30302	0.021278	0.0785853	37602.6	0.319072	0.184961	1.72508	0.0845137	0.352704
ENSG00000160752	1:155315760:155315760:1	1	155315760	1	7.95455	21	intron (4)	44181.2	0.23261	0.101002	2.30302	0.021278	0.0785853	37602.6	0.319072	0.184961	1.72508	0.0845137	0.352704
ENSG00000160752	1:155316008:155316008:1	1	155316008	1	11.3402	21	intron (4)	44181.2	0.23261	0.101002	2.30302	0.021278	0.0785853	37602.6	0.319072	0.184961	1.72508	0.0845137	0.352704
ENSG00000160752	1:155316135:155316135:1	1	155316135	1	7.46269	21	intron (4)	44181.2	0.23261	0.101002	2.30302	0.021278	0.0785853	37602.6	0.319072	0.184961	1.72508	0.0845137	0.352704
ENSG00000160752	1:155316144:155316144:1	1	155316144	1	17.6471	21	intron (4)	44181.2	0.23261	0.101002	2.30302	0.021278	0.0785853	37602.6	0.319072	0.184961	1.72508	0.0845137	0.352704
ENSG00000160752	1:155316594:155316594:1	1	155316594	1	5.26316	21	intron (4)	44181.2	0.23261	0.101002	2.30302	0.021278	0.0785853	37602.6	0.319072	0.184961	1.72508	0.0845137	0.352704
ENSG00000160752	1:155316680:155316680:1	1	155316680	1	12.766	21	intron (4)	44181.2	0.23261	0.101002	2.30302	0.021278	0.0785853	37602.6	0.319072	0.184961	1.72508	0.0845137	0.352704
ENSG00000160752	1:155316730:155316730:1	1	155316730	1	7.52688	21	intron (4)	44181.2	0.23261	0.101002	2.30302	0.021278	0.0785853	37602.6	0.319072	0.184961	1.72508	0.0845137	0.352704
intergenic	1:15566662:15566662:-1	1	15566662	-1	15.1515	NA	0	NA	NA	NA	NA	NA	NA	NA	NA	NA	NA	NA	NA
intergenic	1:15566711:15566711:-1	1	15566711	-1	25	NA	0	NA	NA	NA	NA	NA	NA	NA	NA	NA	NA	NA	NA
intergenic	1:15566789:15566789:-1	1	15566789	-1	34.4828	NA	0	NA	NA	NA	NA	NA	NA	NA	NA	NA	NA	NA	NA
intergenic	1:15566801:15566801:-1	1	15566801	-1	20.6897	NA	0	NA	NA	NA	NA	NA	NA	NA	NA	NA	NA	NA	NA
intergenic	1:15566802:15566802:-1	1	15566802	-1	13.7931	NA	0	NA	NA	NA	NA	NA	NA	NA	NA	NA	NA	NA	NA
ENSG00000163374	1:155670942:155670942:-1	1	155670942	-1	27.5862	25	intron (9)	2725.36	-0.579989	0.107679	-5.3863	7.19211e-08	1.4647e-06	2583.52	-0.073853	0.173855	-0.424797	0.670985	0.873877
ENSG00000163374	1:155670943:155670943:-1	1	155670943	-1	35.7143	25	intron (9)	2725.36	-0.579989	0.107679	-5.3863	7.19211e-08	1.4647e-06	2583.52	-0.073853	0.173855	-0.424797	0.670985	0.873877
intergenic	1:15569737:15569737:-1	1	15569737	-1	24	NA	0	NA	NA	NA	NA	NA	NA	NA	NA	NA	NA	NA	NA
intergenic	1:15569743:15569743:-1	1	15569743	-1	25	NA	0	NA	NA	NA	NA	NA	NA	NA	NA	NA	NA	NA	NA
intergenic	1:15569765:15569765:-1	1	15569765	-1	29.0323	NA	0	NA	NA	NA	NA	NA	NA	NA	NA	NA	NA	NA	NA
intergenic	1:15569769:15569769:-1	1	15569769	-1	25.8065	NA	0	NA	NA	NA	NA	NA	NA	NA	NA	NA	NA	NA	NA
intergenic	1:15569773:15569773:-1	1	15569773	-1	25	NA	0	NA	NA	NA	NA	NA	NA	NA	NA	NA	NA	NA	NA
intergenic	1:15569778:15569778:-1	1	15569778	-1	40.625	NA	0	NA	NA	NA	NA	NA	NA	NA	NA	NA	NA	NA	NA
intergenic	1:15569779:15569779:-1	1	15569779	-1	28.125	NA	0	NA	NA	NA	NA	NA	NA	NA	NA	NA	NA	NA	NA
intergenic	1:15569820:15569820:-1	1	15569820	-1	11.7647	NA	0	NA	NA	NA	NA	NA	NA	NA	NA	NA	NA	NA	NA
intergenic	1:15570410:15570410:-1	1	15570410	-1	37.5	NA	0	NA	NA	NA	NA	NA	NA	NA	NA	NA	NA	NA	NA
intergenic	1:15571979:15571979:-1	1	15571979	-1	92.9577	NA	0	NA	NA	NA	NA	NA	NA	NA	NA	NA	NA	NA	NA
intergenic	1:15571982:15571982:-1	1	15571982	-1	23.6111	NA	0	NA	NA	NA	NA	NA	NA	NA	NA	NA	NA	NA	NA
intergenic	1:15571988:15571988:-1	1	15571988	-1	14.4928	NA	0	NA	NA	NA	NA	NA	NA	NA	NA	NA	NA	NA	NA
intergenic	1:15571997:15571997:-1	1	15571997	-1	22.0339	NA	0	NA	NA	NA	NA	NA	NA	NA	NA	NA	NA	NA	NA
intergenic	1:15572021:15572021:-1	1	15572021	-1	51.7241	NA	0	NA	NA	NA	NA	NA	NA	NA	NA	NA	NA	NA	NA
intergenic	1:15572023:15572023:-1	1	15572023	-1	23.2558	NA	0	NA	NA	NA	NA	NA	NA	NA	NA	NA	NA	NA	NA
intergenic	1:15572033:15572033:-1	1	15572033	-1	18.5185	NA	0	NA	NA	NA	NA	NA	NA	NA	NA	NA	NA	NA	NA
intergenic	1:15572058:15572058:-1	1	15572058	-1	53.0864	NA	0	NA	NA	NA	NA	NA	NA	NA	NA	NA	NA	NA	NA
intergenic	1:15572062:15572062:-1	1	15572062	-1	49.3333	NA	0	NA	NA	NA	NA	NA	NA	NA	NA	NA	NA	NA	NA
intergenic	1:15572063:15572063:-1	1	15572063	-1	29.3333	NA	0	NA	NA	NA	NA	NA	NA	NA	NA	NA	NA	NA	NA
intergenic	1:15572088:15572088:-1	1	15572088	-1	28.0702	NA	0	NA	NA	NA	NA	NA	NA	NA	NA	NA	NA	NA	NA
intergenic	1:15572107:15572107:-1	1	15572107	-1	24.4444	NA	0	NA	NA	NA	NA	NA	NA	NA	NA	NA	NA	NA	NA
intergenic	1:15572262:15572262:-1	1	15572262	-1	7.86517	NA	0	NA	NA	NA	NA	NA	NA	NA	NA	NA	NA	NA	NA
ENSG00000116771	1:15572355:15572355:-1	1	15572355	-1	5.31915	1	3'UTR (1)	8735.92	0.0234975	0.105548	0.222623	0.823829	0.912848	7519.23	0.00604183	0.22753	0.026554	0.978815	0.99259
ENSG00000116771	1:15572366:15572366:-1	1	15572366	-1	14.2857	1	3'UTR (1)	8735.92	0.0234975	0.105548	0.222623	0.823829	0.912848	7519.23	0.00604183	0.22753	0.026554	0.978815	0.99259
ENSG00000116771	1:15572367:15572367:-1	1	15572367	-1	9.45946	1	3'UTR (1)	8735.92	0.0234975	0.105548	0.222623	0.823829	0.912848	7519.23	0.00604183	0.22753	0.026554	0.978815	0.99259
ENSG00000116771	1:15572368:15572368:-1	1	15572368	-1	13.0435	1	3'UTR (1)	8735.92	0.0234975	0.105548	0.222623	0.823829	0.912848	7519.23	0.00604183	0.22753	0.026554	0.978815	0.99259
ENSG00000116771	1:15572369:15572369:-1	1	15572369	-1	10.8108	1	3'UTR (1)	8735.92	0.0234975	0.105548	0.222623	0.823829	0.912848	7519.23	0.00604183	0.22753	0.026554	0.978815	0.99259
ENSG00000116771	1:15572456:15572456:-1	1	15572456	-1	35.2941	1	3'UTR (1)	8735.92	0.0234975	0.105548	0.222623	0.823829	0.912848	7519.23	0.00604183	0.22753	0.026554	0.978815	0.99259
ENSG00000116771	1:15572457:15572457:-1	1	15572457	-1	52.9412	1	3'UTR (1)	8735.92	0.0234975	0.105548	0.222623	0.823829	0.912848	7519.23	0.00604183	0.22753	0.026554	0.978815	0.99259
ENSG00000116771	1:15572492:15572492:-1	1	15572492	-1	53.0612	1	3'UTR (1)	8735.92	0.0234975	0.105548	0.222623	0.823829	0.912848	7519.23	0.00604183	0.22753	0.026554	0.978815	0.99259
ENSG00000116771	1:15572498:15572498:-1	1	15572498	-1	51.8519	1	3'UTR (1)	8735.92	0.0234975	0.105548	0.222623	0.823829	0.912848	7519.23	0.00604183	0.22753	0.026554	0.978815	0.99259
ENSG00000116771	1:15572531:15572531:-1	1	15572531	-1	36.2069	1	3'UTR (1)	8735.92	0.0234975	0.105548	0.222623	0.823829	0.912848	7519.23	0.00604183	0.22753	0.026554	0.978815	0.99259
ENSG00000116771	1:15572535:15572535:-1	1	15572535	-1	38.3333	1	3'UTR (1)	8735.92	0.0234975	0.105548	0.222623	0.823829	0.912848	7519.23	0.00604183	0.22753	0.026554	0.978815	0.99259
ENSG00000116771	1:15572536:15572536:-1	1	15572536	-1	31.6667	1	3'UTR (1)	8735.92	0.0234975	0.105548	0.222623	0.823829	0.912848	7519.23	0.00604183	0.22753	0.026554	0.978815	0.99259
ENSG00000116771	1:15572548:15572548:-1	1	15572548	-1	13.7931	1	3'UTR (1)	8735.92	0.0234975	0.105548	0.222623	0.823829	0.912848	7519.23	0.00604183	0.22753	0.026554	0.978815	0.99259
ENSG00000116771	1:15572587:15572587:-1	1	15572587	-1	30.9091	1	3'UTR (1)	8735.92	0.0234975	0.105548	0.222623	0.823829	0.912848	7519.23	0.00604183	0.22753	0.026554	0.978815	0.99259
ENSG00000116771	1:15572602:15572602:-1	1	15572602	-1	39.2157	1	3'UTR (1)	8735.92	0.0234975	0.105548	0.222623	0.823829	0.912848	7519.23	0.00604183	0.22753	0.026554	0.978815	0.99259
ENSG00000132676	1:155726169:155726169:1	1	155726169	1	25	26	intron (4)	13678.1	-0.331064	0.102793	-3.22068	0.00127889	0.00816232	15910.8	-0.183786	0.193249	-0.951031	0.341589	0.665992
ENSG00000132676	1:155726178:155726178:1	1	155726178	1	15.7895	26	intron (4)	13678.1	-0.331064	0.102793	-3.22068	0.00127889	0.00816232	15910.8	-0.183786	0.193249	-0.951031	0.341589	0.665992
ENSG00000132676	1:155726183:155726183:1	1	155726183	1	12.1951	26	intron (4)	13678.1	-0.331064	0.102793	-3.22068	0.00127889	0.00816232	15910.8	-0.183786	0.193249	-0.951031	0.341589	0.665992
ENSG00000132676	1:155726194:155726194:1	1	155726194	1	17.5	26	intron (4)	13678.1	-0.331064	0.102793	-3.22068	0.00127889	0.00816232	15910.8	-0.183786	0.193249	-0.951031	0.341589	0.665992
ENSG00000132676	1:155726207:155726207:1	1	155726207	1	38.8889	26	intron (4)	13678.1	-0.331064	0.102793	-3.22068	0.00127889	0.00816232	15910.8	-0.183786	0.193249	-0.951031	0.341589	0.665992
ENSG00000132676	1:155726214:155726214:1	1	155726214	1	57.1429	26	intron (4)	13678.1	-0.331064	0.102793	-3.22068	0.00127889	0.00816232	15910.8	-0.183786	0.193249	-0.951031	0.341589	0.665992
ENSG00000132676	1:155726216:155726216:1	1	155726216	1	11.4286	26	intron (4)	13678.1	-0.331064	0.102793	-3.22068	0.00127889	0.00816232	15910.8	-0.183786	0.193249	-0.951031	0.341589	0.665992
ENSG00000132676	1:155726231:155726231:1	1	155726231	1	19.2308	26	intron (4)	13678.1	-0.331064	0.102793	-3.22068	0.00127889	0.00816232	15910.8	-0.183786	0.193249	-0.951031	0.341589	0.665992
ENSG00000116771	1:15572632:15572632:-1	1	15572632	-1	7.59494	1	3'UTR (1)	8735.92	0.0234975	0.105548	0.222623	0.823829	0.912848	7519.23	0.00604183	0.22753	0.026554	0.978815	0.99259
ENSG00000132676	1:155726644:155726644:1	1	155726644	1	12.5	26	intron (4)	13678.1	-0.331064	0.102793	-3.22068	0.00127889	0.00816232	15910.8	-0.183786	0.193249	-0.951031	0.341589	0.665992
ENSG00000132676	1:155726659:155726659:1	1	155726659	1	21.0526	26	intron (4)	13678.1	-0.331064	0.102793	-3.22068	0.00127889	0.00816232	15910.8	-0.183786	0.193249	-0.951031	0.341589	0.665992
ENSG00000132676	1:155726660:155726660:1	1	155726660	1	19.4444	26	intron (4)	13678.1	-0.331064	0.102793	-3.22068	0.00127889	0.00816232	15910.8	-0.183786	0.193249	-0.951031	0.341589	0.665992
ENSG00000132676	1:155726664:155726664:1	1	155726664	1	65	26	intron (4)	13678.1	-0.331064	0.102793	-3.22068	0.00127889	0.00816232	15910.8	-0.183786	0.193249	-0.951031	0.341589	0.665992
ENSG00000132676	1:155726666:155726666:1	1	155726666	1	44.7368	26	intron (4)	13678.1	-0.331064	0.102793	-3.22068	0.00127889	0.00816232	15910.8	-0.183786	0.193249	-0.951031	0.341589	0.665992
ENSG00000132676	1:155726667:155726667:1	1	155726667	1	63.8889	26	intron (4)	13678.1	-0.331064	0.102793	-3.22068	0.00127889	0.00816232	15910.8	-0.183786	0.193249	-0.951031	0.341589	0.665992
ENSG00000132676	1:155726713:155726713:1	1	155726713	1	10.6383	26	intron (4)	13678.1	-0.331064	0.102793	-3.22068	0.00127889	0.00816232	15910.8	-0.183786	0.193249	-0.951031	0.341589	0.665992
ENSG00000132676	1:155726726:155726726:1	1	155726726	1	51.3514	26	intron (4)	13678.1	-0.331064	0.102793	-3.22068	0.00127889	0.00816232	15910.8	-0.183786	0.193249	-0.951031	0.341589	0.665992
ENSG00000132676	1:155726742:155726742:1	1	155726742	1	30.7692	26	intron (4)	13678.1	-0.331064	0.102793	-3.22068	0.00127889	0.00816232	15910.8	-0.183786	0.193249	-0.951031	0.341589	0.665992
ENSG00000132676	1:155726748:155726748:1	1	155726748	1	65.2174	26	intron (4)	13678.1	-0.331064	0.102793	-3.22068	0.00127889	0.00816232	15910.8	-0.183786	0.193249	-0.951031	0.341589	0.665992
ENSG00000132676	1:155726768:155726768:1	1	155726768	1	26.087	26	intron (4)	13678.1	-0.331064	0.102793	-3.22068	0.00127889	0.00816232	15910.8	-0.183786	0.193249	-0.951031	0.341589	0.665992
ENSG00000132676	1:155727344:155727344:1	1	155727344	1	16.2162	26	intron (4)	13678.1	-0.331064	0.102793	-3.22068	0.00127889	0.00816232	15910.8	-0.183786	0.193249	-0.951031	0.341589	0.665992
ENSG00000132676	1:155727411:155727411:1	1	155727411	1	13.8889	26	intron (4)	13678.1	-0.331064	0.102793	-3.22068	0.00127889	0.00816232	15910.8	-0.183786	0.193249	-0.951031	0.341589	0.665992
ENSG00000116771	1:15572849:15572849:-1	1	15572849	-1	20.5882	1	3'UTR (1)	8735.92	0.0234975	0.105548	0.222623	0.823829	0.912848	7519.23	0.00604183	0.22753	0.026554	0.978815	0.99259
ENSG00000116771	1:15572850:15572850:-1	1	15572850	-1	6.57895	1	3'UTR (1)	8735.92	0.0234975	0.105548	0.222623	0.823829	0.912848	7519.23	0.00604183	0.22753	0.026554	0.978815	0.99259
ENSG00000116771	1:15572892:15572892:-1	1	15572892	-1	19.7802	1	3'UTR (1)	8735.92	0.0234975	0.105548	0.222623	0.823829	0.912848	7519.23	0.00604183	0.22753	0.026554	0.978815	0.99259
ENSG00000116771	1:15573001:15573001:-1	1	15573001	-1	23.2558	1	3'UTR (1)	8735.92	0.0234975	0.105548	0.222623	0.823829	0.912848	7519.23	0.00604183	0.22753	0.026554	0.978815	0.99259
ENSG00000116771	1:15573013:15573013:-1	1	15573013	-1	17.9487	1	3'UTR (1)	8735.92	0.0234975	0.105548	0.222623	0.823829	0.912848	7519.23	0.00604183	0.22753	0.026554	0.978815	0.99259
ENSG00000116771	1:15573014:15573014:-1	1	15573014	-1	30	1	3'UTR (1)	8735.92	0.0234975	0.105548	0.222623	0.823829	0.912848	7519.23	0.00604183	0.22753	0.026554	0.978815	0.99259
ENSG00000116771	1:15573135:15573135:-1	1	15573135	-1	11.5702	1	3'UTR (1)	8735.92	0.0234975	0.105548	0.222623	0.823829	0.912848	7519.23	0.00604183	0.22753	0.026554	0.978815	0.99259
ENSG00000116771	1:15573196:15573196:-1	1	15573196	-1	15.4321	1	3'UTR (1)	8735.92	0.0234975	0.105548	0.222623	0.823829	0.912848	7519.23	0.00604183	0.22753	0.026554	0.978815	0.99259
ENSG00000116771	1:15573220:15573220:-1	1	15573220	-1	22.0472	1	3'UTR (1)	8735.92	0.0234975	0.105548	0.222623	0.823829	0.912848	7519.23	0.00604183	0.22753	0.026554	0.978815	0.99259
ENSG00000132676	1:155732499:155732499:1	1	155732499	1	24	26	intron (4)	13678.1	-0.331064	0.102793	-3.22068	0.00127889	0.00816232	15910.8	-0.183786	0.193249	-0.951031	0.341589	0.665992
ENSG00000116771	1:15573252:15573252:-1	1	15573252	-1	83.8384	1	3'UTR (1)	8735.92	0.0234975	0.105548	0.222623	0.823829	0.912848	7519.23	0.00604183	0.22753	0.026554	0.978815	0.99259
ENSG00000132676	1:155733584:155733584:1	1	155733584	1	18.75	26	intron (4)	13678.1	-0.331064	0.102793	-3.22068	0.00127889	0.00816232	15910.8	-0.183786	0.193249	-0.951031	0.341589	0.665992
ENSG00000132676	1:155733714:155733714:1	1	155733714	1	8.92857	26	intron (4)	13678.1	-0.331064	0.102793	-3.22068	0.00127889	0.00816232	15910.8	-0.183786	0.193249	-0.951031	0.341589	0.665992
ENSG00000132676	1:155733762:155733762:1	1	155733762	1	6.41026	26	intron (4)	13678.1	-0.331064	0.102793	-3.22068	0.00127889	0.00816232	15910.8	-0.183786	0.193249	-0.951031	0.341589	0.665992
ENSG00000132676	1:155733885:155733885:1	1	155733885	1	43.5897	26	intron (4)	13678.1	-0.331064	0.102793	-3.22068	0.00127889	0.00816232	15910.8	-0.183786	0.193249	-0.951031	0.341589	0.665992
ENSG00000132676	1:155733892:155733892:1	1	155733892	1	29.2308	26	intron (4)	13678.1	-0.331064	0.102793	-3.22068	0.00127889	0.00816232	15910.8	-0.183786	0.193249	-0.951031	0.341589	0.665992
ENSG00000132676	1:155734266:155734266:1	1	155734266	1	41.0959	26	intron (4)	13678.1	-0.331064	0.102793	-3.22068	0.00127889	0.00816232	15910.8	-0.183786	0.193249	-0.951031	0.341589	0.665992
ENSG00000132676	1:155734405:155734405:1	1	155734405	1	18.1818	26	intron (4)	13678.1	-0.331064	0.102793	-3.22068	0.00127889	0.00816232	15910.8	-0.183786	0.193249	-0.951031	0.341589	0.665992
ENSG00000132676	1:155734424:155734424:1	1	155734424	1	24.0506	26	intron (4)	13678.1	-0.331064	0.102793	-3.22068	0.00127889	0.00816232	15910.8	-0.183786	0.193249	-0.951031	0.341589	0.665992
ENSG00000132676	1:155734439:155734439:1	1	155734439	1	14.7059	26	intron (4)	13678.1	-0.331064	0.102793	-3.22068	0.00127889	0.00816232	15910.8	-0.183786	0.193249	-0.951031	0.341589	0.665992
ENSG00000132676	1:155734451:155734451:1	1	155734451	1	16.4384	26	intron (4)	13678.1	-0.331064	0.102793	-3.22068	0.00127889	0.00816232	15910.8	-0.183786	0.193249	-0.951031	0.341589	0.665992
ENSG00000132676	1:155735318:155735318:1	1	155735318	1	18.9189	26	intron (4)	13678.1	-0.331064	0.102793	-3.22068	0.00127889	0.00816232	15910.8	-0.183786	0.193249	-0.951031	0.341589	0.665992
ENSG00000132676	1:155735356:155735356:1	1	155735356	1	16.6667	26	intron (4)	13678.1	-0.331064	0.102793	-3.22068	0.00127889	0.00816232	15910.8	-0.183786	0.193249	-0.951031	0.341589	0.665992
ENSG00000132676	1:155735420:155735420:1	1	155735420	1	15.3846	26	intron (4)	13678.1	-0.331064	0.102793	-3.22068	0.00127889	0.00816232	15910.8	-0.183786	0.193249	-0.951031	0.341589	0.665992
ENSG00000132676	1:155735430:155735430:1	1	155735430	1	14.0351	26	intron (4)	13678.1	-0.331064	0.102793	-3.22068	0.00127889	0.00816232	15910.8	-0.183786	0.193249	-0.951031	0.341589	0.665992
ENSG00000132676	1:155735466:155735466:1	1	155735466	1	8.95522	26	intron (4)	13678.1	-0.331064	0.102793	-3.22068	0.00127889	0.00816232	15910.8	-0.183786	0.193249	-0.951031	0.341589	0.665992
ENSG00000132676	1:155735502:155735502:1	1	155735502	1	52.6316	26	intron (4)	13678.1	-0.331064	0.102793	-3.22068	0.00127889	0.00816232	15910.8	-0.183786	0.193249	-0.951031	0.341589	0.665992
ENSG00000132676	1:155735509:155735509:1	1	155735509	1	24.2424	26	intron (4)	13678.1	-0.331064	0.102793	-3.22068	0.00127889	0.00816232	15910.8	-0.183786	0.193249	-0.951031	0.341589	0.665992
ENSG00000132676	1:155735741:155735741:1	1	155735741	1	20.5882	26	intron (4)	13678.1	-0.331064	0.102793	-3.22068	0.00127889	0.00816232	15910.8	-0.183786	0.193249	-0.951031	0.341589	0.665992
ENSG00000132676	1:155735765:155735765:1	1	155735765	1	28.5714	26	intron (4)	13678.1	-0.331064	0.102793	-3.22068	0.00127889	0.00816232	15910.8	-0.183786	0.193249	-0.951031	0.341589	0.665992
ENSG00000132676	1:155735945:155735945:1	1	155735945	1	27.5862	26	intron (4)	13678.1	-0.331064	0.102793	-3.22068	0.00127889	0.00816232	15910.8	-0.183786	0.193249	-0.951031	0.341589	0.665992
ENSG00000132676	1:155736493:155736493:1	1	155736493	1	9.63855	26	intron (4)	13678.1	-0.331064	0.102793	-3.22068	0.00127889	0.00816232	15910.8	-0.183786	0.193249	-0.951031	0.341589	0.665992
ENSG00000132676	1:155736556:155736556:1	1	155736556	1	26.3158	26	intron (4)	13678.1	-0.331064	0.102793	-3.22068	0.00127889	0.00816232	15910.8	-0.183786	0.193249	-0.951031	0.341589	0.665992
ENSG00000132676	1:155736558:155736558:1	1	155736558	1	9.33333	26	intron (4)	13678.1	-0.331064	0.102793	-3.22068	0.00127889	0.00816232	15910.8	-0.183786	0.193249	-0.951031	0.341589	0.665992
ENSG00000132676	1:155736582:155736582:1	1	155736582	1	8.62069	26	intron (4)	13678.1	-0.331064	0.102793	-3.22068	0.00127889	0.00816232	15910.8	-0.183786	0.193249	-0.951031	0.341589	0.665992
ENSG00000132676	1:155736583:155736583:1	1	155736583	1	20	26	intron (4)	13678.1	-0.331064	0.102793	-3.22068	0.00127889	0.00816232	15910.8	-0.183786	0.193249	-0.951031	0.341589	0.665992
ENSG00000132676	1:155736626:155736626:1	1	155736626	1	9.80392	26	intron (4)	13678.1	-0.331064	0.102793	-3.22068	0.00127889	0.00816232	15910.8	-0.183786	0.193249	-0.951031	0.341589	0.665992
ENSG00000132676	1:155736669:155736669:1	1	155736669	1	32.7273	26	intron (4)	13678.1	-0.331064	0.102793	-3.22068	0.00127889	0.00816232	15910.8	-0.183786	0.193249	-0.951031	0.341589	0.665992
ENSG00000116580	1:155763840:155763840:-1	1	155763840	-1	80.9524	19	downstream (1), intron (3)	4412.09	-0.336956	0.123094	-2.73739	0.00619286	0.0298604	2223.18	-0.749267	0.199748	-3.75105	0.000176095	0.00828663
ENSG00000163479	1:156014820:156014820:-1	1	156014820	-1	28.5714	18	intron (1)	16494.1	-0.159515	0.103556	-1.54038	0.123467	0.285879	20168.4	0.414097	0.2172	1.90652	0.0565824	0.288126
ENSG00000158769	1:160996561:160996561:-1	1	160996561	-1	24.3243	6	3'UTR (1), downstream (1)	2454.15	-0.258889	0.116311	-2.22583	0.0260257	0.091625	1859.96	-0.289093	0.218674	-1.32203	0.186159	0.514999
ENSG00000158769	1:160996562:160996562:-1	1	160996562	-1	22.7273	6	3'UTR (1), downstream (1)	2454.15	-0.258889	0.116311	-2.22583	0.0260257	0.091625	1859.96	-0.289093	0.218674	-1.32203	0.186159	0.514999
ENSG00000158769	1:160996644:160996644:-1	1	160996644	-1	86.8421	6	3'UTR (1), downstream (1)	2454.15	-0.258889	0.116311	-2.22583	0.0260257	0.091625	1859.96	-0.289093	0.218674	-1.32203	0.186159	0.514999
ENSG00000158769	1:160998026:160998026:-1	1	160998026	-1	32.2222	6	3'UTR (1), downstream (1)	2454.15	-0.258889	0.116311	-2.22583	0.0260257	0.091625	1859.96	-0.289093	0.218674	-1.32203	0.186159	0.514999
ENSG00000158769	1:160998043:160998043:-1	1	160998043	-1	59.2593	6	3'UTR (1), downstream (1)	2454.15	-0.258889	0.116311	-2.22583	0.0260257	0.091625	1859.96	-0.289093	0.218674	-1.32203	0.186159	0.514999
ENSG00000158769	1:160998058:160998058:-1	1	160998058	-1	14.2857	6	3'UTR (1), downstream (1)	2454.15	-0.258889	0.116311	-2.22583	0.0260257	0.091625	1859.96	-0.289093	0.218674	-1.32203	0.186159	0.514999
ENSG00000158769	1:160998064:160998064:-1	1	160998064	-1	10	6	3'UTR (1), downstream (1)	2454.15	-0.258889	0.116311	-2.22583	0.0260257	0.091625	1859.96	-0.289093	0.218674	-1.32203	0.186159	0.514999
ENSG00000158769	1:160998065:160998065:-1	1	160998065	-1	10.6796	6	3'UTR (1), downstream (1)	2454.15	-0.258889	0.116311	-2.22583	0.0260257	0.091625	1859.96	-0.289093	0.218674	-1.32203	0.186159	0.514999
ENSG00000158769	1:160998066:160998066:-1	1	160998066	-1	34.3137	6	3'UTR (1), downstream (1)	2454.15	-0.258889	0.116311	-2.22583	0.0260257	0.091625	1859.96	-0.289093	0.218674	-1.32203	0.186159	0.514999
ENSG00000158769	1:160998067:160998067:-1	1	160998067	-1	51.5464	6	3'UTR (1), downstream (1)	2454.15	-0.258889	0.116311	-2.22583	0.0260257	0.091625	1859.96	-0.289093	0.218674	-1.32203	0.186159	0.514999
ENSG00000158769	1:160998070:160998070:-1	1	160998070	-1	6.93069	6	3'UTR (1), downstream (1)	2454.15	-0.258889	0.116311	-2.22583	0.0260257	0.091625	1859.96	-0.289093	0.218674	-1.32203	0.186159	0.514999
ENSG00000158769	1:160998100:160998100:-1	1	160998100	-1	42.7083	6	3'UTR (1), downstream (1)	2454.15	-0.258889	0.116311	-2.22583	0.0260257	0.091625	1859.96	-0.289093	0.218674	-1.32203	0.186159	0.514999
ENSG00000158769	1:160998106:160998106:-1	1	160998106	-1	8.51064	6	3'UTR (1), downstream (1)	2454.15	-0.258889	0.116311	-2.22583	0.0260257	0.091625	1859.96	-0.289093	0.218674	-1.32203	0.186159	0.514999
ENSG00000158769	1:160998148:160998148:-1	1	160998148	-1	10.5263	6	3'UTR (1), downstream (1)	2454.15	-0.258889	0.116311	-2.22583	0.0260257	0.091625	1859.96	-0.289093	0.218674	-1.32203	0.186159	0.514999
ENSG00000142627	1:16136070:16136070:-1	1	16136070	-1	27.7778	4	intron (1)	7341.39	0.180761	0.140324	1.28818	0.197685	0.392931	4038.31	0.246908	0.294863	0.837366	0.402387	0.716205
ENSG00000143252	1:161366977:161366977:1	1	161366977	1	13.5593	9	3'UTR (1), downstream (5)	7327.5	-0.34456	0.110423	-3.12035	0.00180634	0.0108807	7084.29	0.0274379	0.215022	0.127605	0.898461	0.961634
ENSG00000143252	1:161371363:161371363:1	1	161371363	1	16.129	9	3'UTR (1), downstream (5)	7327.5	-0.34456	0.110423	-3.12035	0.00180634	0.0108807	7084.29	0.0274379	0.215022	0.127605	0.898461	0.961634
ENSG00000143252	1:161371390:161371390:1	1	161371390	1	27.2727	9	3'UTR (1), downstream (5)	7327.5	-0.34456	0.110423	-3.12035	0.00180634	0.0108807	7084.29	0.0274379	0.215022	0.127605	0.898461	0.961634
ENSG00000143228	1:163334628:163334628:1	1	163334628	1	20	12	intron (2)	2361.52	-0.35608	0.117765	-3.02366	0.00249739	0.0142047	1295.61	-0.611264	0.157907	-3.87103	0.000108377	0.00586123
ENSG00000219481	1:16563007:16563007:-1	1	16563007	-1	29.0323	7	3'UTR (1)	3654.45	-0.281054	0.120937	-2.32397	0.0201271	0.075286	2169.74	-0.0228893	0.180688	-0.126679	0.899195	0.962057
ENSG00000219481	1:16563071:16563071:-1	1	16563071	-1	13.9535	7	3'UTR (1)	3654.45	-0.281054	0.120937	-2.32397	0.0201271	0.075286	2169.74	-0.0228893	0.180688	-0.126679	0.899195	0.962057
ENSG00000219481	1:16563101:16563101:-1	1	16563101	-1	15.625	7	3'UTR (1)	3654.45	-0.281054	0.120937	-2.32397	0.0201271	0.075286	2169.74	-0.0228893	0.180688	-0.126679	0.899195	0.962057
ENSG00000219481	1:16563138:16563138:-1	1	16563138	-1	15.1515	7	3'UTR (1)	3654.45	-0.281054	0.120937	-2.32397	0.0201271	0.075286	2169.74	-0.0228893	0.180688	-0.126679	0.899195	0.962057
ENSG00000219481	1:16563144:16563144:-1	1	16563144	-1	31.4286	7	3'UTR (1)	3654.45	-0.281054	0.120937	-2.32397	0.0201271	0.075286	2169.74	-0.0228893	0.180688	-0.126679	0.899195	0.962057
ENSG00000219481	1:16563147:16563147:-1	1	16563147	-1	37.8378	7	3'UTR (1)	3654.45	-0.281054	0.120937	-2.32397	0.0201271	0.075286	2169.74	-0.0228893	0.180688	-0.126679	0.899195	0.962057
ENSG00000219481	1:16563151:16563151:-1	1	16563151	-1	15.7895	7	3'UTR (1)	3654.45	-0.281054	0.120937	-2.32397	0.0201271	0.075286	2169.74	-0.0228893	0.180688	-0.126679	0.899195	0.962057
ENSG00000215908	1:16625491:16625491:-1	1	16625491	-1	19.3548	7	intron (1)	773.921	-0.418275	0.198858	-2.10338	0.0354325	0.114974	867.515	0.352035	0.370466	0.950248	0.341986	0.666145
ENSG00000189339	1:1663538:1663538:-1	1	1663538	-1	23.7288	5	3'UTR (2)	3179.64	0.152867	0.10629	1.43821	0.150375	0.328433	2661.93	0.363201	0.132939	2.73208	0.00629351	0.0813745
ENSG00000189339	1:1663568:1663568:-1	1	1663568	-1	8.19672	5	3'UTR (2)	3179.64	0.152867	0.10629	1.43821	0.150375	0.328433	2661.93	0.363201	0.132939	2.73208	0.00629351	0.0813745
ENSG00000189339	1:1663586:1663586:-1	1	1663586	-1	9.375	5	3'UTR (2)	3179.64	0.152867	0.10629	1.43821	0.150375	0.328433	2661.93	0.363201	0.132939	2.73208	0.00629351	0.0813745
ENSG00000189339	1:1663609:1663609:-1	1	1663609	-1	7.14286	5	3'UTR (2)	3179.64	0.152867	0.10629	1.43821	0.150375	0.328433	2661.93	0.363201	0.132939	2.73208	0.00629351	0.0813745
ENSG00000189339	1:1663638:1663638:-1	1	1663638	-1	5.49451	5	3'UTR (2)	3179.64	0.152867	0.10629	1.43821	0.150375	0.328433	2661.93	0.363201	0.132939	2.73208	0.00629351	0.0813745
ENSG00000189339	1:1664100:1664100:-1	1	1664100	-1	7	5	3'UTR (2)	3179.64	0.152867	0.10629	1.43821	0.150375	0.328433	2661.93	0.363201	0.132939	2.73208	0.00629351	0.0813745
ENSG00000189339	1:1664101:1664101:-1	1	1664101	-1	19.5876	5	3'UTR (2)	3179.64	0.152867	0.10629	1.43821	0.150375	0.328433	2661.93	0.363201	0.132939	2.73208	0.00629351	0.0813745
ENSG00000213064	1:168244376:168244376:1	1	168244376	1	18.1818	4	3'UTR (1)	4160.06	-0.316979	0.124971	-2.53641	0.0111995	0.0480022	3816.3	0.115297	0.189102	0.609711	0.542054	0.802368
ENSG00000213064	1:168244389:168244389:1	1	168244389	1	33.3333	4	3'UTR (1)	4160.06	-0.316979	0.124971	-2.53641	0.0111995	0.0480022	3816.3	0.115297	0.189102	0.609711	0.542054	0.802368
ENSG00000213064	1:168244413:168244413:1	1	168244413	1	16.6667	4	3'UTR (1)	4160.06	-0.316979	0.124971	-2.53641	0.0111995	0.0480022	3816.3	0.115297	0.189102	0.609711	0.542054	0.802368
ENSG00000213064	1:168244441:168244441:1	1	168244441	1	12.1212	4	3'UTR (1)	4160.06	-0.316979	0.124971	-2.53641	0.0111995	0.0480022	3816.3	0.115297	0.189102	0.609711	0.542054	0.802368
ENSG00000213064	1:168244453:168244453:1	1	168244453	1	12.7273	4	3'UTR (1)	4160.06	-0.316979	0.124971	-2.53641	0.0111995	0.0480022	3816.3	0.115297	0.189102	0.609711	0.542054	0.802368
ENSG00000213064	1:168249284:168249284:1	1	168249284	1	18.75	4	3'UTR (1)	4160.06	-0.316979	0.124971	-2.53641	0.0111995	0.0480022	3816.3	0.115297	0.189102	0.609711	0.542054	0.802368
ENSG00000213064	1:168251042:168251042:1	1	168251042	1	36	4	3'UTR (1)	4160.06	-0.316979	0.124971	-2.53641	0.0111995	0.0480022	3816.3	0.115297	0.189102	0.609711	0.542054	0.802368
ENSG00000213064	1:168251048:168251048:1	1	168251048	1	10	4	3'UTR (1)	4160.06	-0.316979	0.124971	-2.53641	0.0111995	0.0480022	3816.3	0.115297	0.189102	0.609711	0.542054	0.802368
ENSG00000213064	1:168251169:168251169:1	1	168251169	1	30.7692	4	3'UTR (1)	4160.06	-0.316979	0.124971	-2.53641	0.0111995	0.0480022	3816.3	0.115297	0.189102	0.609711	0.542054	0.802368
ENSG00000213064	1:168251189:168251189:1	1	168251189	1	10.8108	4	3'UTR (1)	4160.06	-0.316979	0.124971	-2.53641	0.0111995	0.0480022	3816.3	0.115297	0.189102	0.609711	0.542054	0.802368
ENSG00000213064	1:168251225:168251225:1	1	168251225	1	9.61538	4	3'UTR (1)	4160.06	-0.316979	0.124971	-2.53641	0.0111995	0.0480022	3816.3	0.115297	0.189102	0.609711	0.542054	0.802368
ENSG00000213064	1:168251237:168251237:1	1	168251237	1	15.3846	4	3'UTR (1)	4160.06	-0.316979	0.124971	-2.53641	0.0111995	0.0480022	3816.3	0.115297	0.189102	0.609711	0.542054	0.802368
ENSG00000213064	1:168251251:168251251:1	1	168251251	1	22.9167	4	3'UTR (1)	4160.06	-0.316979	0.124971	-2.53641	0.0111995	0.0480022	3816.3	0.115297	0.189102	0.609711	0.542054	0.802368
intergenic	1:168562870:168562870:1	1	168562870	1	25	NA	0	NA	NA	NA	NA	NA	NA	NA	NA	NA	NA	NA	NA
intergenic	1:168562888:168562888:1	1	168562888	1	19.2308	NA	0	NA	NA	NA	NA	NA	NA	NA	NA	NA	NA	NA	NA
ENSG00000215790	1:1729614:1729614:-1	1	1729614	-1	27.2727	6	3'UTR (1), intron (1)	87.2761	0.2508	0.251511	0.997173	0.318681	0.533196	73.3048	-0.185898	0.372386	-0.499209	0.617632	0.844362
ENSG00000215790	1:1729660:1729660:-1	1	1729660	-1	40	6	3'UTR (1), intron (1)	87.2761	0.2508	0.251511	0.997173	0.318681	0.533196	73.3048	-0.185898	0.372386	-0.499209	0.617632	0.844362
ENSG00000215790	1:1729665:1729665:-1	1	1729665	-1	65.2174	6	3'UTR (1), intron (1)	87.2761	0.2508	0.251511	0.997173	0.318681	0.533196	73.3048	-0.185898	0.372386	-0.499209	0.617632	0.844362
intergenic	1:173796713:173796713:-1	1	173796713	-1	29.6296	NA	0	NA	NA	NA	NA	NA	NA	NA	NA	NA	NA	NA	NA
intergenic	1:173797061:173797061:-1	1	173797061	-1	16.6667	NA	0	NA	NA	NA	NA	NA	NA	NA	NA	NA	NA	NA	NA
intergenic	1:173797107:173797107:-1	1	173797107	-1	25	NA	0	NA	NA	NA	NA	NA	NA	NA	NA	NA	NA	NA	NA
ENSG00000120334	1:173800000:173800000:-1	1	173800000	-1	12.069	9	3'UTR (3)	775.482	-0.336832	0.127849	-2.63462	0.00842322	0.0383397	1035.55	0.00901831	0.175388	0.0514192	0.958991	0.98403
ENSG00000117593	1:173858683:173858683:1	1	173858683	1	14.2857	14	downstream (2)	6077.45	-0.0532983	0.118535	-0.449641	0.652969	0.806305	1819.62	-0.470502	0.153887	-3.05745	0.00223231	0.0427757
ENSG00000117593	1:173858698:173858698:1	1	173858698	1	13.1579	14	downstream (2)	6077.45	-0.0532983	0.118535	-0.449641	0.652969	0.806305	1819.62	-0.470502	0.153887	-3.05745	0.00223231	0.0427757
ENSG00000117593	1:173858701:173858701:1	1	173858701	1	10.8108	14	downstream (2)	6077.45	-0.0532983	0.118535	-0.449641	0.652969	0.806305	1819.62	-0.470502	0.153887	-3.05745	0.00223231	0.0427757
ENSG00000117593	1:173858712:173858712:1	1	173858712	1	11.1111	14	downstream (2)	6077.45	-0.0532983	0.118535	-0.449641	0.652969	0.806305	1819.62	-0.470502	0.153887	-3.05745	0.00223231	0.0427757
ENSG00000117593	1:173858743:173858743:1	1	173858743	1	45.2381	14	downstream (2)	6077.45	-0.0532983	0.118535	-0.449641	0.652969	0.806305	1819.62	-0.470502	0.153887	-3.05745	0.00223231	0.0427757
intergenic	1:173858850:173858850:1	1	173858850	1	19.0476	NA	0	NA	NA	NA	NA	NA	NA	NA	NA	NA	NA	NA	NA
intergenic	1:173859124:173859124:1	1	173859124	1	33.3333	NA	0	NA	NA	NA	NA	NA	NA	NA	NA	NA	NA	NA	NA
intergenic	1:173859762:173859762:1	1	173859762	1	13.7931	NA	0	NA	NA	NA	NA	NA	NA	NA	NA	NA	NA	NA	NA
intergenic	1:173859774:173859774:1	1	173859774	1	26.6667	NA	0	NA	NA	NA	NA	NA	NA	NA	NA	NA	NA	NA	NA
intergenic	1:173859784:173859784:1	1	173859784	1	22.2222	NA	0	NA	NA	NA	NA	NA	NA	NA	NA	NA	NA	NA	NA
intergenic	1:173859802:173859802:1	1	173859802	1	32.1429	NA	0	NA	NA	NA	NA	NA	NA	NA	NA	NA	NA	NA	NA
intergenic	1:173859819:173859819:1	1	173859819	1	51.6129	NA	0	NA	NA	NA	NA	NA	NA	NA	NA	NA	NA	NA	NA
intergenic	1:173859828:173859828:1	1	173859828	1	71.875	NA	0	NA	NA	NA	NA	NA	NA	NA	NA	NA	NA	NA	NA
intergenic	1:173859835:173859835:1	1	173859835	1	21.875	NA	0	NA	NA	NA	NA	NA	NA	NA	NA	NA	NA	NA	NA
intergenic	1:173859879:173859879:1	1	173859879	1	15.7895	NA	0	NA	NA	NA	NA	NA	NA	NA	NA	NA	NA	NA	NA
intergenic	1:173859897:173859897:1	1	173859897	1	51.4286	NA	0	NA	NA	NA	NA	NA	NA	NA	NA	NA	NA	NA	NA
ENSG00000179051	1:17414724:17414724:-1	1	17414724	-1	32.1429	3	intron (2)	11020.7	-0.173034	0.103909	-1.66525	0.0958628	0.23876	6789.25	-0.051596	0.13311	-0.38762	0.698297	0.886099
ENSG00000179051	1:17414909:17414909:-1	1	17414909	-1	11.7647	3	intron (2)	11020.7	-0.173034	0.103909	-1.66525	0.0958628	0.23876	6789.25	-0.051596	0.13311	-0.38762	0.698297	0.886099
ENSG00000116199	1:179073347:179073347:1	1	179073347	1	22.7273	2	3'UTR (1)	4053.95	-0.0442779	0.113788	-0.389126	0.697183	0.836538	5132.81	-0.540372	0.246308	-2.19388	0.0282438	0.197151
ENSG00000116199	1:179073557:179073557:1	1	179073557	1	27.7778	2	3'UTR (1)	4053.95	-0.0442779	0.113788	-0.389126	0.697183	0.836538	5132.81	-0.540372	0.246308	-2.19388	0.0282438	0.197151
ENSG00000116199	1:179073562:179073562:1	1	179073562	1	15.5556	2	3'UTR (1)	4053.95	-0.0442779	0.113788	-0.389126	0.697183	0.836538	5132.81	-0.540372	0.246308	-2.19388	0.0282438	0.197151
ENSG00000116199	1:179073566:179073566:1	1	179073566	1	25	2	3'UTR (1)	4053.95	-0.0442779	0.113788	-0.389126	0.697183	0.836538	5132.81	-0.540372	0.246308	-2.19388	0.0282438	0.197151
ENSG00000116199	1:179073770:179073770:1	1	179073770	1	8.33333	2	3'UTR (1)	4053.95	-0.0442779	0.113788	-0.389126	0.697183	0.836538	5132.81	-0.540372	0.246308	-2.19388	0.0282438	0.197151
ENSG00000116199	1:179074957:179074957:1	1	179074957	1	11.3924	2	3'UTR (1)	4053.95	-0.0442779	0.113788	-0.389126	0.697183	0.836538	5132.81	-0.540372	0.246308	-2.19388	0.0282438	0.197151
ENSG00000116199	1:179074965:179074965:1	1	179074965	1	27.8481	2	3'UTR (1)	4053.95	-0.0442779	0.113788	-0.389126	0.697183	0.836538	5132.81	-0.540372	0.246308	-2.19388	0.0282438	0.197151
ENSG00000116199	1:179074970:179074970:1	1	179074970	1	8.33333	2	3'UTR (1)	4053.95	-0.0442779	0.113788	-0.389126	0.697183	0.836538	5132.81	-0.540372	0.246308	-2.19388	0.0282438	0.197151
ENSG00000116199	1:179074975:179074975:1	1	179074975	1	16.4706	2	3'UTR (1)	4053.95	-0.0442779	0.113788	-0.389126	0.697183	0.836538	5132.81	-0.540372	0.246308	-2.19388	0.0282438	0.197151
ENSG00000116199	1:179075045:179075045:1	1	179075045	1	51.1111	2	3'UTR (1)	4053.95	-0.0442779	0.113788	-0.389126	0.697183	0.836538	5132.81	-0.540372	0.246308	-2.19388	0.0282438	0.197151
ENSG00000116199	1:179075046:179075046:1	1	179075046	1	12.5	2	3'UTR (1)	4053.95	-0.0442779	0.113788	-0.389126	0.697183	0.836538	5132.81	-0.540372	0.246308	-2.19388	0.0282438	0.197151
ENSG00000057252	1:179357161:179357161:1	1	179357161	1	18.9189	4	3'UTR (3)	6616.21	-0.25029	0.113288	-2.20932	0.0271525	0.0943224	2819.04	-0.332212	0.147836	-2.24717	0.0246291	0.182021
ENSG00000057252	1:179357403:179357403:1	1	179357403	1	12.8205	4	3'UTR (3)	6616.21	-0.25029	0.113288	-2.20932	0.0271525	0.0943224	2819.04	-0.332212	0.147836	-2.24717	0.0246291	0.182021
ENSG00000057252	1:179357712:179357712:1	1	179357712	1	16.6667	4	3'UTR (3)	6616.21	-0.25029	0.113288	-2.20932	0.0271525	0.0943224	2819.04	-0.332212	0.147836	-2.24717	0.0246291	0.182021
ENSG00000057252	1:179357773:179357773:1	1	179357773	1	54.7619	4	3'UTR (3)	6616.21	-0.25029	0.113288	-2.20932	0.0271525	0.0943224	2819.04	-0.332212	0.147836	-2.24717	0.0246291	0.182021
ENSG00000057252	1:179357787:179357787:1	1	179357787	1	39.0244	4	3'UTR (3)	6616.21	-0.25029	0.113288	-2.20932	0.0271525	0.0943224	2819.04	-0.332212	0.147836	-2.24717	0.0246291	0.182021
ENSG00000057252	1:179357873:179357873:1	1	179357873	1	9.80392	4	3'UTR (3)	6616.21	-0.25029	0.113288	-2.20932	0.0271525	0.0943224	2819.04	-0.332212	0.147836	-2.24717	0.0246291	0.182021
ENSG00000057252	1:179357876:179357876:1	1	179357876	1	13.0435	4	3'UTR (3)	6616.21	-0.25029	0.113288	-2.20932	0.0271525	0.0943224	2819.04	-0.332212	0.147836	-2.24717	0.0246291	0.182021
ENSG00000169905	1:179860360:179860360:-1	1	179860360	-1	80.8511	6	3'UTR (1), intron (2)	6303.26	-0.0677165	0.111139	-0.609297	0.542328	0.73018	6801.3	0.030069	0.189456	0.158713	0.873895	0.953019
ENSG00000078369	1:1852579:1852579:-1	1	1852579	-1	24.3243	10	intron (3)	22012.5	0.00411677	0.0998116	0.0412453	0.9671	0.98474	24399.5	0.195372	0.172541	1.13232	0.2575	0.590504
intergenic	1:19215231:19215231:-1	1	19215231	-1	11.4286	NA	0	NA	NA	NA	NA	NA	NA	NA	NA	NA	NA	NA	NA
intergenic	1:19215243:19215243:-1	1	19215243	-1	23.3333	NA	0	NA	NA	NA	NA	NA	NA	NA	NA	NA	NA	NA	NA
ENSG00000127463	1:19215816:19215816:-1	1	19215816	-1	29.0323	13	3'UTR (1), downstream (2)	7720.5	-0.0284028	0.103866	-0.273455	0.784503	0.890069	2654.35	-0.261209	0.164445	-1.58843	0.112189	0.407694
ENSG00000127463	1:19215850:19215850:-1	1	19215850	-1	10	13	3'UTR (1), downstream (2)	7720.5	-0.0284028	0.103866	-0.273455	0.784503	0.890069	2654.35	-0.261209	0.164445	-1.58843	0.112189	0.407694
ENSG00000127463	1:19215907:19215907:-1	1	19215907	-1	15.1515	13	3'UTR (1), downstream (2)	7720.5	-0.0284028	0.103866	-0.273455	0.784503	0.890069	2654.35	-0.261209	0.164445	-1.58843	0.112189	0.407694
ENSG00000127463	1:19215969:19215969:-1	1	19215969	-1	29.6296	13	3'UTR (1), downstream (2)	7720.5	-0.0284028	0.103866	-0.273455	0.784503	0.890069	2654.35	-0.261209	0.164445	-1.58843	0.112189	0.407694
ENSG00000127463	1:19215970:19215970:-1	1	19215970	-1	23.0769	13	3'UTR (1), downstream (2)	7720.5	-0.0284028	0.103866	-0.273455	0.784503	0.890069	2654.35	-0.261209	0.164445	-1.58843	0.112189	0.407694
ENSG00000127463	1:19216137:19216137:-1	1	19216137	-1	23.3333	13	3'UTR (1), downstream (2)	7720.5	-0.0284028	0.103866	-0.273455	0.784503	0.890069	2654.35	-0.261209	0.164445	-1.58843	0.112189	0.407694
ENSG00000127463	1:19216753:19216753:-1	1	19216753	-1	31.5789	13	3'UTR (1), downstream (2)	7720.5	-0.0284028	0.103866	-0.273455	0.784503	0.890069	2654.35	-0.261209	0.164445	-1.58843	0.112189	0.407694
ENSG00000127463	1:19216755:19216755:-1	1	19216755	-1	25.7143	13	3'UTR (1), downstream (2)	7720.5	-0.0284028	0.103866	-0.273455	0.784503	0.890069	2654.35	-0.261209	0.164445	-1.58843	0.112189	0.407694
ENSG00000127463	1:19216855:19216855:-1	1	19216855	-1	64.8148	13	3'UTR (1), downstream (2)	7720.5	-0.0284028	0.103866	-0.273455	0.784503	0.890069	2654.35	-0.261209	0.164445	-1.58843	0.112189	0.407694
ENSG00000127463	1:19216859:19216859:-1	1	19216859	-1	16.0714	13	3'UTR (1), downstream (2)	7720.5	-0.0284028	0.103866	-0.273455	0.784503	0.890069	2654.35	-0.261209	0.164445	-1.58843	0.112189	0.407694
ENSG00000127463	1:19216862:19216862:-1	1	19216862	-1	20	13	3'UTR (1), downstream (2)	7720.5	-0.0284028	0.103866	-0.273455	0.784503	0.890069	2654.35	-0.261209	0.164445	-1.58843	0.112189	0.407694
ENSG00000127463	1:19216866:19216866:-1	1	19216866	-1	10.5263	13	3'UTR (1), downstream (2)	7720.5	-0.0284028	0.103866	-0.273455	0.784503	0.890069	2654.35	-0.261209	0.164445	-1.58843	0.112189	0.407694
ENSG00000127463	1:19216879:19216879:-1	1	19216879	-1	10.3448	13	3'UTR (2), downstream (1)	7720.5	-0.0284028	0.103866	-0.273455	0.784503	0.890069	2654.35	-0.261209	0.164445	-1.58843	0.112189	0.407694
ENSG00000127463	1:19216962:19216962:-1	1	19216962	-1	36	13	3'UTR (2), downstream (1)	7720.5	-0.0284028	0.103866	-0.273455	0.784503	0.890069	2654.35	-0.261209	0.164445	-1.58843	0.112189	0.407694
ENSG00000127463	1:19216963:19216963:-1	1	19216963	-1	36.1702	13	3'UTR (2), downstream (1)	7720.5	-0.0284028	0.103866	-0.273455	0.784503	0.890069	2654.35	-0.261209	0.164445	-1.58843	0.112189	0.407694
ENSG00000127463	1:19216971:19216971:-1	1	19216971	-1	52.6316	13	3'UTR (2), downstream (1)	7720.5	-0.0284028	0.103866	-0.273455	0.784503	0.890069	2654.35	-0.261209	0.164445	-1.58843	0.112189	0.407694
ENSG00000127463	1:19217303:19217303:-1	1	19217303	-1	35.2941	13	3'UTR (2), downstream (1)	7720.5	-0.0284028	0.103866	-0.273455	0.784503	0.890069	2654.35	-0.261209	0.164445	-1.58843	0.112189	0.407694
ENSG00000127463	1:19217304:19217304:-1	1	19217304	-1	15.1515	13	3'UTR (2), downstream (1)	7720.5	-0.0284028	0.103866	-0.273455	0.784503	0.890069	2654.35	-0.261209	0.164445	-1.58843	0.112189	0.407694
ENSG00000127463	1:19217385:19217385:-1	1	19217385	-1	14.2857	13	3'UTR (2), downstream (1)	7720.5	-0.0284028	0.103866	-0.273455	0.784503	0.890069	2654.35	-0.261209	0.164445	-1.58843	0.112189	0.407694
ENSG00000127463	1:19217405:19217405:-1	1	19217405	-1	12.1212	13	3'UTR (2), downstream (1)	7720.5	-0.0284028	0.103866	-0.273455	0.784503	0.890069	2654.35	-0.261209	0.164445	-1.58843	0.112189	0.407694
ENSG00000127463	1:19217479:19217479:-1	1	19217479	-1	25.8621	13	3'UTR (2), downstream (1)	7720.5	-0.0284028	0.103866	-0.273455	0.784503	0.890069	2654.35	-0.261209	0.164445	-1.58843	0.112189	0.407694
ENSG00000127463	1:19217508:19217508:-1	1	19217508	-1	36.9565	13	3'UTR (2), downstream (1)	7720.5	-0.0284028	0.103866	-0.273455	0.784503	0.890069	2654.35	-0.261209	0.164445	-1.58843	0.112189	0.407694
ENSG00000127463	1:19217515:19217515:-1	1	19217515	-1	17.7778	13	3'UTR (2), downstream (1)	7720.5	-0.0284028	0.103866	-0.273455	0.784503	0.890069	2654.35	-0.261209	0.164445	-1.58843	0.112189	0.407694
ENSG00000053372	1:19258999:19258999:1	1	19258999	1	9.09091	3	3'UTR (1)	5715.69	-0.124137	0.108405	-1.14512	0.252159	0.460445	6140.87	0.128358	0.16256	0.789608	0.429757	0.733954
ENSG00000053372	1:19259025:19259025:1	1	19259025	1	4.82759	3	3'UTR (1)	5715.69	-0.124137	0.108405	-1.14512	0.252159	0.460445	6140.87	0.128358	0.16256	0.789608	0.429757	0.733954
ENSG00000053372	1:19259059:19259059:1	1	19259059	1	22.3301	3	3'UTR (1)	5715.69	-0.124137	0.108405	-1.14512	0.252159	0.460445	6140.87	0.128358	0.16256	0.789608	0.429757	0.733954
ENSG00000053372	1:19259961:19259961:1	1	19259961	1	7.92079	3	3'UTR (1)	5715.69	-0.124137	0.108405	-1.14512	0.252159	0.460445	6140.87	0.128358	0.16256	0.789608	0.429757	0.733954
ENSG00000053372	1:19259964:19259964:1	1	19259964	1	48.9796	3	3'UTR (1)	5715.69	-0.124137	0.108405	-1.14512	0.252159	0.460445	6140.87	0.128358	0.16256	0.789608	0.429757	0.733954
ENSG00000053372	1:19260007:19260007:1	1	19260007	1	39.2857	3	3'UTR (1)	5715.69	-0.124137	0.108405	-1.14512	0.252159	0.460445	6140.87	0.128358	0.16256	0.789608	0.429757	0.733954
ENSG00000053372	1:19260026:19260026:1	1	19260026	1	6.41026	3	3'UTR (1)	5715.69	-0.124137	0.108405	-1.14512	0.252159	0.460445	6140.87	0.128358	0.16256	0.789608	0.429757	0.733954
ENSG00000053372	1:19260038:19260038:1	1	19260038	1	12.7907	3	3'UTR (1)	5715.69	-0.124137	0.108405	-1.14512	0.252159	0.460445	6140.87	0.128358	0.16256	0.789608	0.429757	0.733954
intergenic	1:19262524:19262524:1	1	19262524	1	20	NA	0	NA	NA	NA	NA	NA	NA	NA	NA	NA	NA	NA	NA
intergenic	1:19263600:19263600:1	1	19263600	1	28.5714	NA	0	NA	NA	NA	NA	NA	NA	NA	NA	NA	NA	NA	NA
intergenic	1:19263625:19263625:1	1	19263625	1	19.2308	NA	0	NA	NA	NA	NA	NA	NA	NA	NA	NA	NA	NA	NA
ENSG00000040487	1:19329136:19329136:1	1	19329136	1	25	6	3'UTR (3)	859.536	0.140188	0.147954	0.947512	0.343378	0.557999	958.89	0.624055	0.225857	2.76306	0.00572628	0.0763494
intergenic	1:194647973:194647973:-1	1	194647973	-1	10.5263	NA	0	NA	NA	NA	NA	NA	NA	NA	NA	NA	NA	NA	NA
intergenic	1:194648053:194648053:-1	1	194648053	-1	15.2542	NA	0	NA	NA	NA	NA	NA	NA	NA	NA	NA	NA	NA	NA
intergenic	1:194648063:194648063:-1	1	194648063	-1	12.2807	NA	0	NA	NA	NA	NA	NA	NA	NA	NA	NA	NA	NA	NA
intergenic	1:194779750:194779750:-1	1	194779750	-1	30.7692	NA	0	NA	NA	NA	NA	NA	NA	NA	NA	NA	NA	NA	NA
intergenic	1:194779814:194779814:-1	1	194779814	-1	30	NA	0	NA	NA	NA	NA	NA	NA	NA	NA	NA	NA	NA	NA
intergenic	1:194779821:194779821:-1	1	194779821	-1	18.1818	NA	0	NA	NA	NA	NA	NA	NA	NA	NA	NA	NA	NA	NA
intergenic	1:194783175:194783175:-1	1	194783175	-1	18.75	NA	0	NA	NA	NA	NA	NA	NA	NA	NA	NA	NA	NA	NA
intergenic	1:194783181:194783181:-1	1	194783181	-1	25	NA	0	NA	NA	NA	NA	NA	NA	NA	NA	NA	NA	NA	NA
intergenic	1:194783213:194783213:-1	1	194783213	-1	59.5238	NA	0	NA	NA	NA	NA	NA	NA	NA	NA	NA	NA	NA	NA
ENSG00000066279	1:197098607:197098607:-1	1	197098607	-1	14.2857	3	intron (2)	20640.5	0.0595213	0.122517	0.485819	0.627096	0.791372	5813.01	-0.430338	0.269695	-1.59565	0.110568	0.404654
ENSG00000066279	1:197098660:197098660:-1	1	197098660	-1	25	3	intron (2)	20640.5	0.0595213	0.122517	0.485819	0.627096	0.791372	5813.01	-0.430338	0.269695	-1.59565	0.110568	0.404654
ENSG00000066279	1:197098714:197098714:-1	1	197098714	-1	24.1379	3	intron (2)	20640.5	0.0595213	0.122517	0.485819	0.627096	0.791372	5813.01	-0.430338	0.269695	-1.59565	0.110568	0.404654
ENSG00000066279	1:197098719:197098719:-1	1	197098719	-1	18.5185	3	intron (2)	20640.5	0.0595213	0.122517	0.485819	0.627096	0.791372	5813.01	-0.430338	0.269695	-1.59565	0.110568	0.404654
ENSG00000066279	1:197098720:197098720:-1	1	197098720	-1	35.7143	3	intron (2)	20640.5	0.0595213	0.122517	0.485819	0.627096	0.791372	5813.01	-0.430338	0.269695	-1.59565	0.110568	0.404654
ENSG00000066279	1:197098721:197098721:-1	1	197098721	-1	24	3	intron (2)	20640.5	0.0595213	0.122517	0.485819	0.627096	0.791372	5813.01	-0.430338	0.269695	-1.59565	0.110568	0.404654
ENSG00000116833	1:200031364:200031364:1	1	200031364	1	40.7407	6	intron (2), upstream (1)	2969.34	-0.634493	0.120744	-5.25488	1.48123e-07	2.86361e-06	2877.48	-0.0203063	0.129805	-0.156436	0.875689	0.953761
ENSG00000116833	1:200031432:200031432:1	1	200031432	1	53.8462	6	intron (2), upstream (1)	2969.34	-0.634493	0.120744	-5.25488	1.48123e-07	2.86361e-06	2877.48	-0.0203063	0.129805	-0.156436	0.875689	0.953761
ENSG00000116833	1:200031497:200031497:1	1	200031497	1	10.4478	6	intron (2), upstream (1)	2969.34	-0.634493	0.120744	-5.25488	1.48123e-07	2.86361e-06	2877.48	-0.0203063	0.129805	-0.156436	0.875689	0.953761
ENSG00000116833	1:200031498:200031498:1	1	200031498	1	10.6061	6	intron (2), upstream (1)	2969.34	-0.634493	0.120744	-5.25488	1.48123e-07	2.86361e-06	2877.48	-0.0203063	0.129805	-0.156436	0.875689	0.953761
ENSG00000116833	1:200031499:200031499:1	1	200031499	1	22.7273	6	intron (2), upstream (1)	2969.34	-0.634493	0.120744	-5.25488	1.48123e-07	2.86361e-06	2877.48	-0.0203063	0.129805	-0.156436	0.875689	0.953761
ENSG00000116833	1:200031679:200031679:1	1	200031679	1	38.2353	6	intron (2), upstream (1)	2969.34	-0.634493	0.120744	-5.25488	1.48123e-07	2.86361e-06	2877.48	-0.0203063	0.129805	-0.156436	0.875689	0.953761
ENSG00000134375	1:201961590:201961590:1	1	201961590	1	30.303	4	intron (1)	3968.98	-0.324546	0.126869	-2.55812	0.0105239	0.0457148	6369.98	0.0187769	0.227453	0.0825526	0.934207	0.975012
ENSG00000176393	1:201992176:201992176:1	1	201992176	1	43.75	14	intron (2)	4579.91	-0.353655	0.107658	-3.285	0.00101981	0.00675385	2634.52	-0.59323	0.191123	-3.10392	0.00190978	0.0389128
ENSG00000176393	1:201994760:201994760:1	1	201994760	1	17.2414	14	intron (2)	4579.91	-0.353655	0.107658	-3.285	0.00101981	0.00675385	2634.52	-0.59323	0.191123	-3.10392	0.00190978	0.0389128
ENSG00000176393	1:201995501:201995501:1	1	201995501	1	11.7647	14	intron (2)	4579.91	-0.353655	0.107658	-3.285	0.00101981	0.00675385	2634.52	-0.59323	0.191123	-3.10392	0.00190978	0.0389128
ENSG00000176393	1:201995526:201995526:1	1	201995526	1	16.6667	14	intron (2)	4579.91	-0.353655	0.107658	-3.285	0.00101981	0.00675385	2634.52	-0.59323	0.191123	-3.10392	0.00190978	0.0389128
ENSG00000176393	1:201995539:201995539:1	1	201995539	1	63.8889	14	intron (2)	4579.91	-0.353655	0.107658	-3.285	0.00101981	0.00675385	2634.52	-0.59323	0.191123	-3.10392	0.00190978	0.0389128
ENSG00000176393	1:201995546:201995546:1	1	201995546	1	10.8108	14	intron (2)	4579.91	-0.353655	0.107658	-3.285	0.00101981	0.00675385	2634.52	-0.59323	0.191123	-3.10392	0.00190978	0.0389128
ENSG00000176393	1:201995596:201995596:1	1	201995596	1	15.1515	14	intron (2)	4579.91	-0.353655	0.107658	-3.285	0.00101981	0.00675385	2634.52	-0.59323	0.191123	-3.10392	0.00190978	0.0389128
ENSG00000176393	1:201995602:201995602:1	1	201995602	1	24.1379	14	intron (2)	4579.91	-0.353655	0.107658	-3.285	0.00101981	0.00675385	2634.52	-0.59323	0.191123	-3.10392	0.00190978	0.0389128
ENSG00000198625	1:204555689:204555689:1	1	204555689	1	13.3333	17	3'UTR (7)	2885.7	-0.324213	0.120784	-2.68424	0.00726947	0.034085	3092.18	-0.461831	0.268116	-1.7225	0.084979	0.353848
ENSG00000198625	1:204556405:204556405:1	1	204556405	1	9.83607	17	3'UTR (7)	2885.7	-0.324213	0.120784	-2.68424	0.00726947	0.034085	3092.18	-0.461831	0.268116	-1.7225	0.084979	0.353848
ENSG00000198625	1:204556420:204556420:1	1	204556420	1	25.4545	17	3'UTR (7)	2885.7	-0.324213	0.120784	-2.68424	0.00726947	0.034085	3092.18	-0.461831	0.268116	-1.7225	0.084979	0.353848
ENSG00000198625	1:204556451:204556451:1	1	204556451	1	12.069	17	3'UTR (7)	2885.7	-0.324213	0.120784	-2.68424	0.00726947	0.034085	3092.18	-0.461831	0.268116	-1.7225	0.084979	0.353848
ENSG00000198625	1:204556463:204556463:1	1	204556463	1	10	17	3'UTR (7)	2885.7	-0.324213	0.120784	-2.68424	0.00726947	0.034085	3092.18	-0.461831	0.268116	-1.7225	0.084979	0.353848
ENSG00000198625	1:204556465:204556465:1	1	204556465	1	39.6552	17	3'UTR (7)	2885.7	-0.324213	0.120784	-2.68424	0.00726947	0.034085	3092.18	-0.461831	0.268116	-1.7225	0.084979	0.353848
ENSG00000198625	1:204556511:204556511:1	1	204556511	1	13.1148	17	3'UTR (7)	2885.7	-0.324213	0.120784	-2.68424	0.00726947	0.034085	3092.18	-0.461831	0.268116	-1.7225	0.084979	0.353848
ENSG00000198625	1:204556520:204556520:1	1	204556520	1	10.2941	17	3'UTR (7)	2885.7	-0.324213	0.120784	-2.68424	0.00726947	0.034085	3092.18	-0.461831	0.268116	-1.7225	0.084979	0.353848
ENSG00000198625	1:204556538:204556538:1	1	204556538	1	19.697	17	3'UTR (7)	2885.7	-0.324213	0.120784	-2.68424	0.00726947	0.034085	3092.18	-0.461831	0.268116	-1.7225	0.084979	0.353848
ENSG00000198625	1:204556539:204556539:1	1	204556539	1	13.1148	17	3'UTR (7)	2885.7	-0.324213	0.120784	-2.68424	0.00726947	0.034085	3092.18	-0.461831	0.268116	-1.7225	0.084979	0.353848
ENSG00000198625	1:204556541:204556541:1	1	204556541	1	7.14286	17	3'UTR (7)	2885.7	-0.324213	0.120784	-2.68424	0.00726947	0.034085	3092.18	-0.461831	0.268116	-1.7225	0.084979	0.353848
ENSG00000198625	1:204556544:204556544:1	1	204556544	1	6.49351	17	3'UTR (7)	2885.7	-0.324213	0.120784	-2.68424	0.00726947	0.034085	3092.18	-0.461831	0.268116	-1.7225	0.084979	0.353848
ENSG00000198625	1:204556585:204556585:1	1	204556585	1	11.4286	17	3'UTR (7)	2885.7	-0.324213	0.120784	-2.68424	0.00726947	0.034085	3092.18	-0.461831	0.268116	-1.7225	0.084979	0.353848
ENSG00000198625	1:204556598:204556598:1	1	204556598	1	6.25	17	3'UTR (7)	2885.7	-0.324213	0.120784	-2.68424	0.00726947	0.034085	3092.18	-0.461831	0.268116	-1.7225	0.084979	0.353848
ENSG00000198625	1:204556616:204556616:1	1	204556616	1	28.3784	17	3'UTR (7)	2885.7	-0.324213	0.120784	-2.68424	0.00726947	0.034085	3092.18	-0.461831	0.268116	-1.7225	0.084979	0.353848
ENSG00000198625	1:204556653:204556653:1	1	204556653	1	9.09091	17	3'UTR (7)	2885.7	-0.324213	0.120784	-2.68424	0.00726947	0.034085	3092.18	-0.461831	0.268116	-1.7225	0.084979	0.353848
ENSG00000198625	1:204557467:204557467:1	1	204557467	1	18.3673	17	3'UTR (7)	2885.7	-0.324213	0.120784	-2.68424	0.00726947	0.034085	3092.18	-0.461831	0.268116	-1.7225	0.084979	0.353848
ENSG00000198625	1:204557483:204557483:1	1	204557483	1	9.23077	17	3'UTR (7)	2885.7	-0.324213	0.120784	-2.68424	0.00726947	0.034085	3092.18	-0.461831	0.268116	-1.7225	0.084979	0.353848
ENSG00000198625	1:204557503:204557503:1	1	204557503	1	19.403	17	3'UTR (7)	2885.7	-0.324213	0.120784	-2.68424	0.00726947	0.034085	3092.18	-0.461831	0.268116	-1.7225	0.084979	0.353848
ENSG00000198625	1:204557520:204557520:1	1	204557520	1	10.6061	17	3'UTR (7)	2885.7	-0.324213	0.120784	-2.68424	0.00726947	0.034085	3092.18	-0.461831	0.268116	-1.7225	0.084979	0.353848
ENSG00000198625	1:204557521:204557521:1	1	204557521	1	15.625	17	3'UTR (7)	2885.7	-0.324213	0.120784	-2.68424	0.00726947	0.034085	3092.18	-0.461831	0.268116	-1.7225	0.084979	0.353848
ENSG00000198625	1:204557532:204557532:1	1	204557532	1	20	17	3'UTR (7)	2885.7	-0.324213	0.120784	-2.68424	0.00726947	0.034085	3092.18	-0.461831	0.268116	-1.7225	0.084979	0.353848
ENSG00000198625	1:204557576:204557576:1	1	204557576	1	19.4444	17	3'UTR (7)	2885.7	-0.324213	0.120784	-2.68424	0.00726947	0.034085	3092.18	-0.461831	0.268116	-1.7225	0.084979	0.353848
ENSG00000198625	1:204557599:204557599:1	1	204557599	1	39.2857	17	3'UTR (7)	2885.7	-0.324213	0.120784	-2.68424	0.00726947	0.034085	3092.18	-0.461831	0.268116	-1.7225	0.084979	0.353848
ENSG00000117242	1:20647004:20647004:-1	1	20647004	-1	19.0476	1	intron (1)	596.217	0.222026	0.138356	1.60475	0.108549	0.260906	378.368	-0.0337574	0.271522	-0.124327	0.901057	0.962972
ENSG00000117242	1:20648088:20648088:-1	1	20648088	-1	16	1	intron (1)	596.217	0.222026	0.138356	1.60475	0.108549	0.260906	378.368	-0.0337574	0.271522	-0.124327	0.901057	0.962972
ENSG00000117242	1:20649499:20649499:-1	1	20649499	-1	46.3415	1	exon (1)	596.217	0.222026	0.138356	1.60475	0.108549	0.260906	378.368	-0.0337574	0.271522	-0.124327	0.901057	0.962972
ENSG00000117242	1:20649508:20649508:-1	1	20649508	-1	33.3333	1	exon (1)	596.217	0.222026	0.138356	1.60475	0.108549	0.260906	378.368	-0.0337574	0.271522	-0.124327	0.901057	0.962972
ENSG00000117242	1:20649520:20649520:-1	1	20649520	-1	37.8378	1	exon (1)	596.217	0.222026	0.138356	1.60475	0.108549	0.260906	378.368	-0.0337574	0.271522	-0.124327	0.901057	0.962972
ENSG00000117242	1:20649530:20649530:-1	1	20649530	-1	90.625	1	exon (1)	596.217	0.222026	0.138356	1.60475	0.108549	0.260906	378.368	-0.0337574	0.271522	-0.124327	0.901057	0.962972
ENSG00000117242	1:20649539:20649539:-1	1	20649539	-1	38.4615	1	exon (1)	596.217	0.222026	0.138356	1.60475	0.108549	0.260906	378.368	-0.0337574	0.271522	-0.124327	0.901057	0.962972
ENSG00000117242	1:20649582:20649582:-1	1	20649582	-1	94.1176	1	exon (1)	596.217	0.222026	0.138356	1.60475	0.108549	0.260906	378.368	-0.0337574	0.271522	-0.124327	0.901057	0.962972
ENSG00000117242	1:20649585:20649585:-1	1	20649585	-1	100	1	exon (1)	596.217	0.222026	0.138356	1.60475	0.108549	0.260906	378.368	-0.0337574	0.271522	-0.124327	0.901057	0.962972
ENSG00000127483	1:20755311:20755311:-1	1	20755311	-1	39.726	14	intron (1)	21664	0.0493204	0.108695	0.45375	0.650009	0.804927	15719.7	-0.146836	0.146915	-0.999459	0.317572	0.646841
ENSG00000127483	1:20755324:20755324:-1	1	20755324	-1	12.6984	14	intron (1)	21664	0.0493204	0.108695	0.45375	0.650009	0.804927	15719.7	-0.146836	0.146915	-0.999459	0.317572	0.646841
ENSG00000127483	1:20755347:20755347:-1	1	20755347	-1	9.25926	14	intron (1)	21664	0.0493204	0.108695	0.45375	0.650009	0.804927	15719.7	-0.146836	0.146915	-0.999459	0.317572	0.646841
ENSG00000127483	1:20755463:20755463:-1	1	20755463	-1	12.766	14	intron (1)	21664	0.0493204	0.108695	0.45375	0.650009	0.804927	15719.7	-0.146836	0.146915	-0.999459	0.317572	0.646841
ENSG00000127483	1:20755465:20755465:-1	1	20755465	-1	28.8889	14	intron (1)	21664	0.0493204	0.108695	0.45375	0.650009	0.804927	15719.7	-0.146836	0.146915	-0.999459	0.317572	0.646841
ENSG00000127483	1:20755466:20755466:-1	1	20755466	-1	17.7778	14	intron (1)	21664	0.0493204	0.108695	0.45375	0.650009	0.804927	15719.7	-0.146836	0.146915	-0.999459	0.317572	0.646841
ENSG00000127483	1:20755492:20755492:-1	1	20755492	-1	14.8148	14	intron (1)	21664	0.0493204	0.108695	0.45375	0.650009	0.804927	15719.7	-0.146836	0.146915	-0.999459	0.317572	0.646841
ENSG00000127483	1:20755569:20755569:-1	1	20755569	-1	57.5	14	intron (1)	21664	0.0493204	0.108695	0.45375	0.650009	0.804927	15719.7	-0.146836	0.146915	-0.999459	0.317572	0.646841
ENSG00000127483	1:20756781:20756781:-1	1	20756781	-1	10.8696	14	intron (1)	21664	0.0493204	0.108695	0.45375	0.650009	0.804927	15719.7	-0.146836	0.146915	-0.999459	0.317572	0.646841
ENSG00000127483	1:20756818:20756818:-1	1	20756818	-1	10.5263	14	intron (1)	21664	0.0493204	0.108695	0.45375	0.650009	0.804927	15719.7	-0.146836	0.146915	-0.999459	0.317572	0.646841
ENSG00000127483	1:20756847:20756847:-1	1	20756847	-1	48.5714	14	intron (1)	21664	0.0493204	0.108695	0.45375	0.650009	0.804927	15719.7	-0.146836	0.146915	-0.999459	0.317572	0.646841
ENSG00000127483	1:20756912:20756912:-1	1	20756912	-1	28	14	intron (1)	21664	0.0493204	0.108695	0.45375	0.650009	0.804927	15719.7	-0.146836	0.146915	-0.999459	0.317572	0.646841
ENSG00000127483	1:20756977:20756977:-1	1	20756977	-1	38.0952	14	intron (1)	21664	0.0493204	0.108695	0.45375	0.650009	0.804927	15719.7	-0.146836	0.146915	-0.999459	0.317572	0.646841
ENSG00000127483	1:20756982:20756982:-1	1	20756982	-1	27.2727	14	intron (1)	21664	0.0493204	0.108695	0.45375	0.650009	0.804927	15719.7	-0.146836	0.146915	-0.999459	0.317572	0.646841
ENSG00000127483	1:20756983:20756983:-1	1	20756983	-1	54.5455	14	intron (1)	21664	0.0493204	0.108695	0.45375	0.650009	0.804927	15719.7	-0.146836	0.146915	-0.999459	0.317572	0.646841
ENSG00000127483	1:20775406:20775406:-1	1	20775406	-1	12.6582	14	intron (1)	21664	0.0493204	0.108695	0.45375	0.650009	0.804927	15719.7	-0.146836	0.146915	-0.999459	0.317572	0.646841
ENSG00000127483	1:20775410:20775410:-1	1	20775410	-1	67.0886	14	intron (1)	21664	0.0493204	0.108695	0.45375	0.650009	0.804927	15719.7	-0.146836	0.146915	-0.999459	0.317572	0.646841
ENSG00000127483	1:20775424:20775424:-1	1	20775424	-1	6.32911	14	intron (1)	21664	0.0493204	0.108695	0.45375	0.650009	0.804927	15719.7	-0.146836	0.146915	-0.999459	0.317572	0.646841
ENSG00000117335	1:207768991:207768991:1	1	207768991	1	23.1579	19	intron (8)	17747.8	0.00098485	0.116293	0.00846867	0.993243	0.997207	7613.93	-0.058576	0.115953	-0.505169	0.61344	0.842826
ENSG00000117335	1:207769004:207769004:1	1	207769004	1	6.60377	19	intron (8)	17747.8	0.00098485	0.116293	0.00846867	0.993243	0.997207	7613.93	-0.058576	0.115953	-0.505169	0.61344	0.842826
ENSG00000117335	1:207769082:207769082:1	1	207769082	1	10.1266	19	intron (8)	17747.8	0.00098485	0.116293	0.00846867	0.993243	0.997207	7613.93	-0.058576	0.115953	-0.505169	0.61344	0.842826
ENSG00000117335	1:207769102:207769102:1	1	207769102	1	12.069	19	intron (8)	17747.8	0.00098485	0.116293	0.00846867	0.993243	0.997207	7613.93	-0.058576	0.115953	-0.505169	0.61344	0.842826
ENSG00000117335	1:207769111:207769111:1	1	207769111	1	26.2295	19	intron (8)	17747.8	0.00098485	0.116293	0.00846867	0.993243	0.997207	7613.93	-0.058576	0.115953	-0.505169	0.61344	0.842826
ENSG00000117335	1:207769127:207769127:1	1	207769127	1	95	19	intron (8)	17747.8	0.00098485	0.116293	0.00846867	0.993243	0.997207	7613.93	-0.058576	0.115953	-0.505169	0.61344	0.842826
ENSG00000117335	1:207769137:207769137:1	1	207769137	1	17.6471	19	intron (8)	17747.8	0.00098485	0.116293	0.00846867	0.993243	0.997207	7613.93	-0.058576	0.115953	-0.505169	0.61344	0.842826
ENSG00000117335	1:207769138:207769138:1	1	207769138	1	17.6471	19	intron (8)	17747.8	0.00098485	0.116293	0.00846867	0.993243	0.997207	7613.93	-0.058576	0.115953	-0.505169	0.61344	0.842826
ENSG00000117335	1:207769223:207769223:1	1	207769223	1	17.3913	19	intron (8)	17747.8	0.00098485	0.116293	0.00846867	0.993243	0.997207	7613.93	-0.058576	0.115953	-0.505169	0.61344	0.842826
ENSG00000117335	1:207769818:207769818:1	1	207769818	1	31.4286	19	intron (8)	17747.8	0.00098485	0.116293	0.00846867	0.993243	0.997207	7613.93	-0.058576	0.115953	-0.505169	0.61344	0.842826
ENSG00000117335	1:207769842:207769842:1	1	207769842	1	36.3636	19	intron (8)	17747.8	0.00098485	0.116293	0.00846867	0.993243	0.997207	7613.93	-0.058576	0.115953	-0.505169	0.61344	0.842826
ENSG00000117335	1:207769862:207769862:1	1	207769862	1	12.1951	19	intron (8)	17747.8	0.00098485	0.116293	0.00846867	0.993243	0.997207	7613.93	-0.058576	0.115953	-0.505169	0.61344	0.842826
ENSG00000117335	1:207769863:207769863:1	1	207769863	1	19.0476	19	intron (8)	17747.8	0.00098485	0.116293	0.00846867	0.993243	0.997207	7613.93	-0.058576	0.115953	-0.505169	0.61344	0.842826
ENSG00000117335	1:207769907:207769907:1	1	207769907	1	18.75	19	intron (8)	17747.8	0.00098485	0.116293	0.00846867	0.993243	0.997207	7613.93	-0.058576	0.115953	-0.505169	0.61344	0.842826
ENSG00000117335	1:207769911:207769911:1	1	207769911	1	25	19	intron (8)	17747.8	0.00098485	0.116293	0.00846867	0.993243	0.997207	7613.93	-0.058576	0.115953	-0.505169	0.61344	0.842826
ENSG00000117335	1:207769915:207769915:1	1	207769915	1	43.2432	19	intron (8)	17747.8	0.00098485	0.116293	0.00846867	0.993243	0.997207	7613.93	-0.058576	0.115953	-0.505169	0.61344	0.842826
ENSG00000117335	1:207769930:207769930:1	1	207769930	1	34.375	19	intron (8)	17747.8	0.00098485	0.116293	0.00846867	0.993243	0.997207	7613.93	-0.058576	0.115953	-0.505169	0.61344	0.842826
ENSG00000117335	1:207769931:207769931:1	1	207769931	1	60	19	intron (8)	17747.8	0.00098485	0.116293	0.00846867	0.993243	0.997207	7613.93	-0.058576	0.115953	-0.505169	0.61344	0.842826
ENSG00000117335	1:207769940:207769940:1	1	207769940	1	32.6087	19	intron (8)	17747.8	0.00098485	0.116293	0.00846867	0.993243	0.997207	7613.93	-0.058576	0.115953	-0.505169	0.61344	0.842826
ENSG00000152104	1:214355794:214355794:-1	1	214355794	-1	13.5135	5	3'UTR (1)	2280.8	-0.518118	0.124107	-4.17478	2.9828e-05	0.00033041	742.544	-0.0942351	0.269433	-0.349754	0.726523	0.897211
ENSG00000152104	1:214355827:214355827:-1	1	214355827	-1	15.3846	5	3'UTR (1)	2280.8	-0.518118	0.124107	-4.17478	2.9828e-05	0.00033041	742.544	-0.0942351	0.269433	-0.349754	0.726523	0.897211
ENSG00000152104	1:214356397:214356397:-1	1	214356397	-1	50	5	3'UTR (1)	2280.8	-0.518118	0.124107	-4.17478	2.9828e-05	0.00033041	742.544	-0.0942351	0.269433	-0.349754	0.726523	0.897211
ENSG00000152104	1:214356403:214356403:-1	1	214356403	-1	16.6667	5	3'UTR (1)	2280.8	-0.518118	0.124107	-4.17478	2.9828e-05	0.00033041	742.544	-0.0942351	0.269433	-0.349754	0.726523	0.897211
ENSG00000162813	1:220057912:220057912:-1	1	220057912	-1	9.90991	11	3'UTR (3)	3960.12	-0.351942	0.126897	-2.77343	0.00554681	0.0274061	2262.32	-0.1631	0.175176	-0.931063	0.351821	0.673602
ENSG00000162813	1:220057921:220057921:-1	1	220057921	-1	65.4867	11	3'UTR (3)	3960.12	-0.351942	0.126897	-2.77343	0.00554681	0.0274061	2262.32	-0.1631	0.175176	-0.931063	0.351821	0.673602
ENSG00000162813	1:220057933:220057933:-1	1	220057933	-1	60.1852	11	3'UTR (3)	3960.12	-0.351942	0.126897	-2.77343	0.00554681	0.0274061	2262.32	-0.1631	0.175176	-0.931063	0.351821	0.673602
ENSG00000162813	1:220057934:220057934:-1	1	220057934	-1	29.3578	11	3'UTR (3)	3960.12	-0.351942	0.126897	-2.77343	0.00554681	0.0274061	2262.32	-0.1631	0.175176	-0.931063	0.351821	0.673602
ENSG00000162813	1:220057996:220057996:-1	1	220057996	-1	18.75	11	3'UTR (3)	3960.12	-0.351942	0.126897	-2.77343	0.00554681	0.0274061	2262.32	-0.1631	0.175176	-0.931063	0.351821	0.673602
ENSG00000162813	1:220058005:220058005:-1	1	220058005	-1	22.9508	11	3'UTR (3)	3960.12	-0.351942	0.126897	-2.77343	0.00554681	0.0274061	2262.32	-0.1631	0.175176	-0.931063	0.351821	0.673602
ENSG00000162813	1:220058119:220058119:-1	1	220058119	-1	5.59441	11	3'UTR (3)	3960.12	-0.351942	0.126897	-2.77343	0.00554681	0.0274061	2262.32	-0.1631	0.175176	-0.931063	0.351821	0.673602
ENSG00000162813	1:220058142:220058142:-1	1	220058142	-1	29.927	11	3'UTR (3)	3960.12	-0.351942	0.126897	-2.77343	0.00554681	0.0274061	2262.32	-0.1631	0.175176	-0.931063	0.351821	0.673602
ENSG00000162813	1:220058604:220058604:-1	1	220058604	-1	8.10811	11	3'UTR (3)	3960.12	-0.351942	0.126897	-2.77343	0.00554681	0.0274061	2262.32	-0.1631	0.175176	-0.931063	0.351821	0.673602
ENSG00000162813	1:220058621:220058621:-1	1	220058621	-1	14.6341	11	3'UTR (3)	3960.12	-0.351942	0.126897	-2.77343	0.00554681	0.0274061	2262.32	-0.1631	0.175176	-0.931063	0.351821	0.673602
ENSG00000162813	1:220058640:220058640:-1	1	220058640	-1	23.0769	11	3'UTR (3)	3960.12	-0.351942	0.126897	-2.77343	0.00554681	0.0274061	2262.32	-0.1631	0.175176	-0.931063	0.351821	0.673602
ENSG00000162813	1:220058669:220058669:-1	1	220058669	-1	8.19672	11	3'UTR (3)	3960.12	-0.351942	0.126897	-2.77343	0.00554681	0.0274061	2262.32	-0.1631	0.175176	-0.931063	0.351821	0.673602
ENSG00000162813	1:220058703:220058703:-1	1	220058703	-1	4.1958	11	3'UTR (3)	3960.12	-0.351942	0.126897	-2.77343	0.00554681	0.0274061	2262.32	-0.1631	0.175176	-0.931063	0.351821	0.673602
ENSG00000162813	1:220058724:220058724:-1	1	220058724	-1	5.30303	11	3'UTR (3)	3960.12	-0.351942	0.126897	-2.77343	0.00554681	0.0274061	2262.32	-0.1631	0.175176	-0.931063	0.351821	0.673602
ENSG00000218510	1:22026393:22026393:1	1	22026393	1	16.6667	13	intron (3)	798.757	0.0680886	0.128107	0.531498	0.595073	0.769638	1255.38	0.419804	0.278151	1.50927	0.13123	0.442712
ENSG00000218510	1:22026509:22026509:1	1	22026509	1	40	13	intron (3)	798.757	0.0680886	0.128107	0.531498	0.595073	0.769638	1255.38	0.419804	0.278151	1.50927	0.13123	0.442712
ENSG00000218510	1:22026514:22026514:1	1	22026514	1	10.2564	13	intron (3)	798.757	0.0680886	0.128107	0.531498	0.595073	0.769638	1255.38	0.419804	0.278151	1.50927	0.13123	0.442712
ENSG00000218510	1:22028782:22028782:1	1	22028782	1	25	13	intron (3)	798.757	0.0680886	0.128107	0.531498	0.595073	0.769638	1255.38	0.419804	0.278151	1.50927	0.13123	0.442712
ENSG00000186205	1:220809716:220809716:1	1	220809716	1	17.2414	7	intron (1)	7110.45	-0.60647	0.115739	-5.23997	1.60601e-07	3.06664e-06	6287.78	-0.04789	0.153893	-0.311191	0.755656	0.909376
ENSG00000186205	1:220814546:220814546:1	1	220814546	1	32	7	3'UTR (1)	7110.45	-0.60647	0.115739	-5.23997	1.60601e-07	3.06664e-06	6287.78	-0.04789	0.153893	-0.311191	0.755656	0.909376
ENSG00000186205	1:220814547:220814547:1	1	220814547	1	22.449	7	3'UTR (1)	7110.45	-0.60647	0.115739	-5.23997	1.60601e-07	3.06664e-06	6287.78	-0.04789	0.153893	-0.311191	0.755656	0.909376
ENSG00000186205	1:220814704:220814704:1	1	220814704	1	10.8108	7	3'UTR (1)	7110.45	-0.60647	0.115739	-5.23997	1.60601e-07	3.06664e-06	6287.78	-0.04789	0.153893	-0.311191	0.755656	0.909376
ENSG00000186205	1:220814736:220814736:1	1	220814736	1	12.1212	7	3'UTR (1)	7110.45	-0.60647	0.115739	-5.23997	1.60601e-07	3.06664e-06	6287.78	-0.04789	0.153893	-0.311191	0.755656	0.909376
ENSG00000162923	1:224390182:224390182:-1	1	224390182	-1	11.1111	9	intron (1)	8908.9	-0.318163	0.109204	-2.91347	0.00357439	0.0191057	5067.44	-0.346314	0.166934	-2.07455	0.0380281	0.234234
ENSG00000162923	1:224390258:224390258:-1	1	224390258	-1	30	9	intron (1)	8908.9	-0.318163	0.109204	-2.91347	0.00357439	0.0191057	5067.44	-0.346314	0.166934	-2.07455	0.0380281	0.234234
ENSG00000154380	1:225490451:225490451:-1	1	225490451	-1	40.7407	9	3'UTR (1), downstream (1)	18331.5	-0.0404977	0.13243	-0.305805	0.759753	0.874048	9210.51	-0.556014	0.305649	-1.81913	0.0688921	0.320485
ENSG00000143742	1:225784617:225784617:1	1	225784617	1	25	5	intron (2)	9046.21	0.242557	0.169837	1.42817	0.153243	0.332757	14825.9	-0.25396	0.260829	-0.973663	0.330224	0.656086
ENSG00000143742	1:225784624:225784624:1	1	225784624	1	16	5	intron (2)	9046.21	0.242557	0.169837	1.42817	0.153243	0.332757	14825.9	-0.25396	0.260829	-0.973663	0.330224	0.656086
ENSG00000143742	1:225786879:225786879:1	1	225786879	1	10.1562	5	CDS (1), intron (1)	9046.21	0.242557	0.169837	1.42817	0.153243	0.332757	14825.9	-0.25396	0.260829	-0.973663	0.330224	0.656086
ENSG00000143742	1:225786943:225786943:1	1	225786943	1	12.7273	5	CDS (1), intron (1)	9046.21	0.242557	0.169837	1.42817	0.153243	0.332757	14825.9	-0.25396	0.260829	-0.973663	0.330224	0.656086
ENSG00000143742	1:225786972:225786972:1	1	225786972	1	5.71429	5	3'UTR (1), intron (1)	9046.21	0.242557	0.169837	1.42817	0.153243	0.332757	14825.9	-0.25396	0.260829	-0.973663	0.330224	0.656086
ENSG00000143742	1:225787033:225787033:1	1	225787033	1	14	5	intron (2)	9046.21	0.242557	0.169837	1.42817	0.153243	0.332757	14825.9	-0.25396	0.260829	-0.973663	0.330224	0.656086
ENSG00000143742	1:225787046:225787046:1	1	225787046	1	70.5882	5	intron (2)	9046.21	0.242557	0.169837	1.42817	0.153243	0.332757	14825.9	-0.25396	0.260829	-0.973663	0.330224	0.656086
ENSG00000143742	1:225787280:225787280:1	1	225787280	1	15.625	5	intron (2)	9046.21	0.242557	0.169837	1.42817	0.153243	0.332757	14825.9	-0.25396	0.260829	-0.973663	0.330224	0.656086
ENSG00000143742	1:225788235:225788235:1	1	225788235	1	7.40741	5	intron (2)	9046.21	0.242557	0.169837	1.42817	0.153243	0.332757	14825.9	-0.25396	0.260829	-0.973663	0.330224	0.656086
ENSG00000143742	1:225788244:225788244:1	1	225788244	1	13.9785	5	intron (2)	9046.21	0.242557	0.169837	1.42817	0.153243	0.332757	14825.9	-0.25396	0.260829	-0.973663	0.330224	0.656086
ENSG00000143742	1:225788245:225788245:1	1	225788245	1	9.47368	5	intron (2)	9046.21	0.242557	0.169837	1.42817	0.153243	0.332757	14825.9	-0.25396	0.260829	-0.973663	0.330224	0.656086
ENSG00000143742	1:225788248:225788248:1	1	225788248	1	26.0417	5	intron (2)	9046.21	0.242557	0.169837	1.42817	0.153243	0.332757	14825.9	-0.25396	0.260829	-0.973663	0.330224	0.656086
ENSG00000143742	1:225788288:225788288:1	1	225788288	1	17.284	5	intron (2)	9046.21	0.242557	0.169837	1.42817	0.153243	0.332757	14825.9	-0.25396	0.260829	-0.973663	0.330224	0.656086
ENSG00000143742	1:225788349:225788349:1	1	225788349	1	83.9286	5	intron (2)	9046.21	0.242557	0.169837	1.42817	0.153243	0.332757	14825.9	-0.25396	0.260829	-0.973663	0.330224	0.656086
ENSG00000143742	1:225788472:225788472:1	1	225788472	1	16.2791	5	intron (2)	9046.21	0.242557	0.169837	1.42817	0.153243	0.332757	14825.9	-0.25396	0.260829	-0.973663	0.330224	0.656086
ENSG00000143742	1:225788491:225788491:1	1	225788491	1	37.7778	5	intron (2)	9046.21	0.242557	0.169837	1.42817	0.153243	0.332757	14825.9	-0.25396	0.260829	-0.973663	0.330224	0.656086
ENSG00000143742	1:225788496:225788496:1	1	225788496	1	30	5	intron (2)	9046.21	0.242557	0.169837	1.42817	0.153243	0.332757	14825.9	-0.25396	0.260829	-0.973663	0.330224	0.656086
ENSG00000143742	1:225788541:225788541:1	1	225788541	1	53.8462	5	intron (2)	9046.21	0.242557	0.169837	1.42817	0.153243	0.332757	14825.9	-0.25396	0.260829	-0.973663	0.330224	0.656086
ENSG00000143742	1:225788542:225788542:1	1	225788542	1	20	5	intron (2)	9046.21	0.242557	0.169837	1.42817	0.153243	0.332757	14825.9	-0.25396	0.260829	-0.973663	0.330224	0.656086
ENSG00000143742	1:225788555:225788555:1	1	225788555	1	16.6667	5	intron (2)	9046.21	0.242557	0.169837	1.42817	0.153243	0.332757	14825.9	-0.25396	0.260829	-0.973663	0.330224	0.656086
ENSG00000143742	1:225788557:225788557:1	1	225788557	1	10.8108	5	intron (2)	9046.21	0.242557	0.169837	1.42817	0.153243	0.332757	14825.9	-0.25396	0.260829	-0.973663	0.330224	0.656086
ENSG00000143751	1:225983699:225983699:-1	1	225983699	-1	12.1212	1	3'UTR (1)	2678.41	-0.167889	0.117092	-1.43382	0.151622	0.330555	2196.75	-0.542536	0.164082	-3.3065	0.000944695	0.0260356
intergenic	1:231331024:231331024:-1	1	231331024	-1	21.4286	NA	0	NA	NA	NA	NA	NA	NA	NA	NA	NA	NA	NA	NA
ENSG00000204219	1:23381114:23381114:-1	1	23381114	-1	10.6061	6	3'UTR (1)	3276.48	-0.477123	0.128935	-3.70048	0.000215191	0.00179727	2759.04	0.226123	0.187871	1.20361	0.228741	0.563389
ENSG00000204219	1:23381148:23381148:-1	1	23381148	-1	32.6087	6	3'UTR (1)	3276.48	-0.477123	0.128935	-3.70048	0.000215191	0.00179727	2759.04	0.226123	0.187871	1.20361	0.228741	0.563389
ENSG00000204219	1:23382313:23382313:-1	1	23382313	-1	52	6	intron (1)	3276.48	-0.477123	0.128935	-3.70048	0.000215191	0.00179727	2759.04	0.226123	0.187871	1.20361	0.228741	0.563389
ENSG00000204219	1:23420511:23420511:-1	1	23420511	-1	20.8333	6	intron (1)	3276.48	-0.477123	0.128935	-3.70048	0.000215191	0.00179727	2759.04	0.226123	0.187871	1.20361	0.228741	0.563389
ENSG00000204219	1:23420525:23420525:-1	1	23420525	-1	29.4118	6	intron (1)	3276.48	-0.477123	0.128935	-3.70048	0.000215191	0.00179727	2759.04	0.226123	0.187871	1.20361	0.228741	0.563389
intergenic	1:236538010:236538010:-1	1	236538010	-1	34.4828	NA	0	NA	NA	NA	NA	NA	NA	NA	NA	NA	NA	NA	NA
ENSG00000188529	1:23972244:23972244:-1	1	23972244	-1	28	16	intron (8)	19680.7	0.125583	0.118263	1.0619	0.288283	0.50181	17403.8	-0.0152853	0.196477	-0.0777969	0.93799	0.976235
ENSG00000203666	1:245122731:245122731:1	1	245122731	1	20.4545	16	downstream (3), exon (1)	1947.31	-0.306238	0.111723	-2.74106	0.00612416	0.0295757	3390.17	-0.0147703	0.158868	-0.0929724	0.925925	0.971384
ENSG00000117602	1:24537689:24537689:1	1	24537689	1	18	11	3'UTR (1), downstream (8)	2512.23	0.0601714	0.128512	0.468218	0.639629	0.799825	2193.36	-0.173977	0.185289	-0.938949	0.347757	0.670016
ENSG00000117602	1:24537698:24537698:1	1	24537698	1	19.1489	11	3'UTR (1), downstream (8)	2512.23	0.0601714	0.128512	0.468218	0.639629	0.799825	2193.36	-0.173977	0.185289	-0.938949	0.347757	0.670016
ENSG00000117602	1:24537709:24537709:1	1	24537709	1	32.6087	11	3'UTR (1), downstream (8)	2512.23	0.0601714	0.128512	0.468218	0.639629	0.799825	2193.36	-0.173977	0.185289	-0.938949	0.347757	0.670016
ENSG00000117602	1:24537712:24537712:1	1	24537712	1	70.4545	11	3'UTR (1), downstream (8)	2512.23	0.0601714	0.128512	0.468218	0.639629	0.799825	2193.36	-0.173977	0.185289	-0.938949	0.347757	0.670016
ENSG00000117602	1:24537713:24537713:1	1	24537713	1	58.5366	11	3'UTR (1), downstream (8)	2512.23	0.0601714	0.128512	0.468218	0.639629	0.799825	2193.36	-0.173977	0.185289	-0.938949	0.347757	0.670016
intergenic	1:246945111:246945111:-1	1	246945111	-1	18.1818	NA	0	NA	NA	NA	NA	NA	NA	NA	NA	NA	NA	NA	NA
intergenic	1:247098317:247098317:-1	1	247098317	-1	12.1212	NA	0	NA	NA	NA	NA	NA	NA	NA	NA	NA	NA	NA	NA
intergenic	1:247099467:247099467:-1	1	247099467	-1	21.9512	NA	0	NA	NA	NA	NA	NA	NA	NA	NA	NA	NA	NA	NA
intergenic	1:247099471:247099471:-1	1	247099471	-1	15.3846	NA	0	NA	NA	NA	NA	NA	NA	NA	NA	NA	NA	NA	NA
intergenic	1:247099481:247099481:-1	1	247099481	-1	17.3913	NA	0	NA	NA	NA	NA	NA	NA	NA	NA	NA	NA	NA	NA
intergenic	1:247099761:247099761:-1	1	247099761	-1	10.6061	NA	0	NA	NA	NA	NA	NA	NA	NA	NA	NA	NA	NA	NA
intergenic	1:247099816:247099816:-1	1	247099816	-1	10	NA	0	NA	NA	NA	NA	NA	NA	NA	NA	NA	NA	NA	NA
ENSG00000188295	1:247100417:247100417:-1	1	247100417	-1	9.1954	5	CDS (2)	1133.8	0.00365898	0.127666	0.0286605	0.977135	0.989691	1432.9	-0.226354	0.158432	-1.42871	0.153087	0.473921
ENSG00000196418	1:247155672:247155672:-1	1	247155672	-1	21.1538	6	downstream (2), intron (2)	3057.32	-0.14549	0.139404	-1.04365	0.296647	0.510867	3735.6	-0.0227299	0.156607	-0.14514	0.8846	0.957388
ENSG00000196418	1:247158106:247158106:-1	1	247158106	-1	18.1818	6	intron (4)	3057.32	-0.14549	0.139404	-1.04365	0.296647	0.510867	3735.6	-0.0227299	0.156607	-0.14514	0.8846	0.957388
ENSG00000130695	1:26256288:26256288:1	1	26256288	1	33.3333	8	intron (3), upstream (1)	6237.02	0.265085	0.106212	2.49581	0.0125669	0.0525988	4073.43	-0.0453884	0.229079	-0.198134	0.84294	0.942086
ENSG00000142751	1:26876353:26876353:-1	1	26876353	-1	10.6061	5	3'UTR (1)	2210.01	0.211729	0.107862	1.96297	0.0496502	0.148152	2188.56	-0.266761	0.252714	-1.05558	0.291159	0.62375
ENSG00000142751	1:26876354:26876354:-1	1	26876354	-1	16.6667	5	3'UTR (1)	2210.01	0.211729	0.107862	1.96297	0.0496502	0.148152	2188.56	-0.266761	0.252714	-1.05558	0.291159	0.62375
ENSG00000142751	1:26878025:26878025:-1	1	26878025	-1	31.25	5	3'UTR (1)	2210.01	0.211729	0.107862	1.96297	0.0496502	0.148152	2188.56	-0.266761	0.252714	-1.05558	0.291159	0.62375
ENSG00000142751	1:26878459:26878459:-1	1	26878459	-1	14.8148	5	3'UTR (1)	2210.01	0.211729	0.107862	1.96297	0.0496502	0.148152	2188.56	-0.266761	0.252714	-1.05558	0.291159	0.62375
ENSG00000142751	1:26878464:26878464:-1	1	26878464	-1	38.4615	5	3'UTR (1)	2210.01	0.211729	0.107862	1.96297	0.0496502	0.148152	2188.56	-0.266761	0.252714	-1.05558	0.291159	0.62375
ENSG00000142751	1:26878553:26878553:-1	1	26878553	-1	10.8696	5	3'UTR (1)	2210.01	0.211729	0.107862	1.96297	0.0496502	0.148152	2188.56	-0.266761	0.252714	-1.05558	0.291159	0.62375
ENSG00000142751	1:26878655:26878655:-1	1	26878655	-1	18.3673	5	3'UTR (1)	2210.01	0.211729	0.107862	1.96297	0.0496502	0.148152	2188.56	-0.266761	0.252714	-1.05558	0.291159	0.62375
ENSG00000142751	1:26878673:26878673:-1	1	26878673	-1	17.5	5	3'UTR (1)	2210.01	0.211729	0.107862	1.96297	0.0496502	0.148152	2188.56	-0.266761	0.252714	-1.05558	0.291159	0.62375
ENSG00000142751	1:26878733:26878733:-1	1	26878733	-1	27.5862	5	3'UTR (1)	2210.01	0.211729	0.107862	1.96297	0.0496502	0.148152	2188.56	-0.266761	0.252714	-1.05558	0.291159	0.62375
ENSG00000142751	1:26879111:26879111:-1	1	26879111	-1	10.5263	5	3'UTR (1)	2210.01	0.211729	0.107862	1.96297	0.0496502	0.148152	2188.56	-0.266761	0.252714	-1.05558	0.291159	0.62375
ENSG00000142751	1:26880477:26880477:-1	1	26880477	-1	31.25	5	intron (1)	2210.01	0.211729	0.107862	1.96297	0.0496502	0.148152	2188.56	-0.266761	0.252714	-1.05558	0.291159	0.62375
ENSG00000142751	1:26882130:26882130:-1	1	26882130	-1	13.7931	5	intron (1)	2210.01	0.211729	0.107862	1.96297	0.0496502	0.148152	2188.56	-0.266761	0.252714	-1.05558	0.291159	0.62375
ENSG00000142751	1:26882134:26882134:-1	1	26882134	-1	22.2222	5	intron (1)	2210.01	0.211729	0.107862	1.96297	0.0496502	0.148152	2188.56	-0.266761	0.252714	-1.05558	0.291159	0.62375
ENSG00000142751	1:26882165:26882165:-1	1	26882165	-1	75	5	intron (1)	2210.01	0.211729	0.107862	1.96297	0.0496502	0.148152	2188.56	-0.266761	0.252714	-1.05558	0.291159	0.62375
ENSG00000142751	1:26883624:26883624:-1	1	26883624	-1	19.0476	5	intron (1)	2210.01	0.211729	0.107862	1.96297	0.0496502	0.148152	2188.56	-0.266761	0.252714	-1.05558	0.291159	0.62375
ENSG00000142751	1:26883698:26883698:-1	1	26883698	-1	12.9032	5	intron (1)	2210.01	0.211729	0.107862	1.96297	0.0496502	0.148152	2188.56	-0.266761	0.252714	-1.05558	0.291159	0.62375
ENSG00000142751	1:26883701:26883701:-1	1	26883701	-1	24.1379	5	intron (1)	2210.01	0.211729	0.107862	1.96297	0.0496502	0.148152	2188.56	-0.266761	0.252714	-1.05558	0.291159	0.62375
ENSG00000090273	1:26943266:26943266:1	1	26943266	1	33.3333	4	intron (1)	9824.41	-0.280886	0.112133	-2.50495	0.0122468	0.0515529	7761.52	-0.011526	0.164787	-0.0699451	0.944237	0.978747
ENSG00000253368	1:26995760:26995760:1	1	26995760	1	12.766	2	intron (1)	4150.8	-0.418895	0.114318	-3.66431	0.000248005	0.0020346	5966.25	0.275575	0.230364	1.19626	0.231596	0.565809
ENSG00000253368	1:26997127:26997127:1	1	26997127	1	8.19672	2	intron (1)	4150.8	-0.418895	0.114318	-3.66431	0.000248005	0.0020346	5966.25	0.275575	0.230364	1.19626	0.231596	0.565809
ENSG00000117758	1:27818145:27818145:1	1	27818145	1	18.4211	5	intron (1)	2253.26	0.125926	0.121144	1.03947	0.298585	0.512507	2109.22	0.166106	0.172541	0.962702	0.335697	0.661178
ENSG00000130772	1:28335065:28335065:1	1	28335065	1	50	5	3'UTR (1)	998.567	0.205993	0.132702	1.5523	0.12059	0.280917	908.277	0.261674	0.22871	1.14413	0.25257	0.585703
ENSG00000130772	1:28335181:28335181:1	1	28335181	1	11.1111	5	3'UTR (1)	998.567	0.205993	0.132702	1.5523	0.12059	0.280917	908.277	0.261674	0.22871	1.14413	0.25257	0.585703
ENSG00000130772	1:28335225:28335225:1	1	28335225	1	10.8696	5	3'UTR (1)	998.567	0.205993	0.132702	1.5523	0.12059	0.280917	908.277	0.261674	0.22871	1.14413	0.25257	0.585703
ENSG00000130772	1:28335671:28335671:1	1	28335671	1	8.62069	5	3'UTR (1)	998.567	0.205993	0.132702	1.5523	0.12059	0.280917	908.277	0.261674	0.22871	1.14413	0.25257	0.585703
ENSG00000130772	1:28335675:28335675:1	1	28335675	1	14.2857	5	3'UTR (1)	998.567	0.205993	0.132702	1.5523	0.12059	0.280917	908.277	0.261674	0.22871	1.14413	0.25257	0.585703
ENSG00000130772	1:28335688:28335688:1	1	28335688	1	58.3333	5	3'UTR (1)	998.567	0.205993	0.132702	1.5523	0.12059	0.280917	908.277	0.261674	0.22871	1.14413	0.25257	0.585703
ENSG00000130772	1:28335702:28335702:1	1	28335702	1	13.6364	5	3'UTR (1)	998.567	0.205993	0.132702	1.5523	0.12059	0.280917	908.277	0.261674	0.22871	1.14413	0.25257	0.585703
ENSG00000130772	1:28335742:28335742:1	1	28335742	1	9.61538	5	3'UTR (1)	998.567	0.205993	0.132702	1.5523	0.12059	0.280917	908.277	0.261674	0.22871	1.14413	0.25257	0.585703
ENSG00000130772	1:28335743:28335743:1	1	28335743	1	15.3846	5	3'UTR (1)	998.567	0.205993	0.132702	1.5523	0.12059	0.280917	908.277	0.261674	0.22871	1.14413	0.25257	0.585703
ENSG00000204138	1:28497792:28497792:1	1	28497792	1	9.1954	9	3'UTR (1), downstream (1)	7637.93	0.137619	0.103176	1.33383	0.182259	0.372509	5506.54	-0.317065	0.212387	-1.49286	0.135473	0.449788
ENSG00000204138	1:28497809:28497809:1	1	28497809	1	5.20833	9	3'UTR (1), downstream (1)	7637.93	0.137619	0.103176	1.33383	0.182259	0.372509	5506.54	-0.317065	0.212387	-1.49286	0.135473	0.449788
ENSG00000204138	1:28497848:28497848:1	1	28497848	1	6.48148	9	3'UTR (1), downstream (1)	7637.93	0.137619	0.103176	1.33383	0.182259	0.372509	5506.54	-0.317065	0.212387	-1.49286	0.135473	0.449788
ENSG00000204138	1:28497875:28497875:1	1	28497875	1	6.66667	9	3'UTR (1), downstream (1)	7637.93	0.137619	0.103176	1.33383	0.182259	0.372509	5506.54	-0.317065	0.212387	-1.49286	0.135473	0.449788
ENSG00000204138	1:28497881:28497881:1	1	28497881	1	5.94059	9	3'UTR (1), downstream (1)	7637.93	0.137619	0.103176	1.33383	0.182259	0.372509	5506.54	-0.317065	0.212387	-1.49286	0.135473	0.449788
ENSG00000204138	1:28498819:28498819:1	1	28498819	1	13.0435	9	3'UTR (1), downstream (1)	7637.93	0.137619	0.103176	1.33383	0.182259	0.372509	5506.54	-0.317065	0.212387	-1.49286	0.135473	0.449788
ENSG00000204138	1:28498858:28498858:1	1	28498858	1	19.8198	9	3'UTR (1), downstream (1)	7637.93	0.137619	0.103176	1.33383	0.182259	0.372509	5506.54	-0.317065	0.212387	-1.49286	0.135473	0.449788
ENSG00000204138	1:28498903:28498903:1	1	28498903	1	12.1739	9	3'UTR (1), downstream (1)	7637.93	0.137619	0.103176	1.33383	0.182259	0.372509	5506.54	-0.317065	0.212387	-1.49286	0.135473	0.449788
ENSG00000204138	1:28498906:28498906:1	1	28498906	1	22.3214	9	3'UTR (1), downstream (1)	7637.93	0.137619	0.103176	1.33383	0.182259	0.372509	5506.54	-0.317065	0.212387	-1.49286	0.135473	0.449788
ENSG00000204138	1:28498915:28498915:1	1	28498915	1	7.5	9	3'UTR (1), downstream (1)	7637.93	0.137619	0.103176	1.33383	0.182259	0.372509	5506.54	-0.317065	0.212387	-1.49286	0.135473	0.449788
ENSG00000204138	1:28498921:28498921:1	1	28498921	1	23.1405	9	3'UTR (1), downstream (1)	7637.93	0.137619	0.103176	1.33383	0.182259	0.372509	5506.54	-0.317065	0.212387	-1.49286	0.135473	0.449788
ENSG00000204138	1:28498953:28498953:1	1	28498953	1	12.6582	9	3'UTR (1), downstream (1)	7637.93	0.137619	0.103176	1.33383	0.182259	0.372509	5506.54	-0.317065	0.212387	-1.49286	0.135473	0.449788
ENSG00000204138	1:28498954:28498954:1	1	28498954	1	35.443	9	3'UTR (1), downstream (1)	7637.93	0.137619	0.103176	1.33383	0.182259	0.372509	5506.54	-0.317065	0.212387	-1.49286	0.135473	0.449788
ENSG00000204138	1:28498957:28498957:1	1	28498957	1	6.66667	9	3'UTR (1), downstream (1)	7637.93	0.137619	0.103176	1.33383	0.182259	0.372509	5506.54	-0.317065	0.212387	-1.49286	0.135473	0.449788
ENSG00000204138	1:28498974:28498974:1	1	28498974	1	25.4902	9	3'UTR (1), downstream (1)	7637.93	0.137619	0.103176	1.33383	0.182259	0.372509	5506.54	-0.317065	0.212387	-1.49286	0.135473	0.449788
ENSG00000204138	1:28499200:28499200:1	1	28499200	1	8.21918	9	3'UTR (1), downstream (1)	7637.93	0.137619	0.103176	1.33383	0.182259	0.372509	5506.54	-0.317065	0.212387	-1.49286	0.135473	0.449788
ENSG00000204138	1:28499205:28499205:1	1	28499205	1	7.89474	9	3'UTR (1), downstream (1)	7637.93	0.137619	0.103176	1.33383	0.182259	0.372509	5506.54	-0.317065	0.212387	-1.49286	0.135473	0.449788
ENSG00000204138	1:28499248:28499248:1	1	28499248	1	39.5062	9	3'UTR (1), downstream (1)	7637.93	0.137619	0.103176	1.33383	0.182259	0.372509	5506.54	-0.317065	0.212387	-1.49286	0.135473	0.449788
ENSG00000204138	1:28499261:28499261:1	1	28499261	1	7.14286	9	3'UTR (1), downstream (1)	7637.93	0.137619	0.103176	1.33383	0.182259	0.372509	5506.54	-0.317065	0.212387	-1.49286	0.135473	0.449788
ENSG00000204138	1:28499262:28499262:1	1	28499262	1	10.4478	9	3'UTR (1), downstream (1)	7637.93	0.137619	0.103176	1.33383	0.182259	0.372509	5506.54	-0.317065	0.212387	-1.49286	0.135473	0.449788
ENSG00000204138	1:28499265:28499265:1	1	28499265	1	9.85915	9	3'UTR (1), downstream (1)	7637.93	0.137619	0.103176	1.33383	0.182259	0.372509	5506.54	-0.317065	0.212387	-1.49286	0.135473	0.449788
ENSG00000204138	1:28499275:28499275:1	1	28499275	1	17.5439	9	3'UTR (1), downstream (1)	7637.93	0.137619	0.103176	1.33383	0.182259	0.372509	5506.54	-0.317065	0.212387	-1.49286	0.135473	0.449788
ENSG00000204138	1:28499503:28499503:1	1	28499503	1	20.3125	9	3'UTR (1), downstream (1)	7637.93	0.137619	0.103176	1.33383	0.182259	0.372509	5506.54	-0.317065	0.212387	-1.49286	0.135473	0.449788
ENSG00000204138	1:28499519:28499519:1	1	28499519	1	34.1463	9	3'UTR (1), downstream (1)	7637.93	0.137619	0.103176	1.33383	0.182259	0.372509	5506.54	-0.317065	0.212387	-1.49286	0.135473	0.449788
ENSG00000204138	1:28499573:28499573:1	1	28499573	1	11.6279	9	3'UTR (1), downstream (1)	7637.93	0.137619	0.103176	1.33383	0.182259	0.372509	5506.54	-0.317065	0.212387	-1.49286	0.135473	0.449788
ENSG00000204138	1:28499606:28499606:1	1	28499606	1	13.0952	9	3'UTR (1), downstream (1)	7637.93	0.137619	0.103176	1.33383	0.182259	0.372509	5506.54	-0.317065	0.212387	-1.49286	0.135473	0.449788
ENSG00000204138	1:28499616:28499616:1	1	28499616	1	8.13953	9	3'UTR (1), downstream (1)	7637.93	0.137619	0.103176	1.33383	0.182259	0.372509	5506.54	-0.317065	0.212387	-1.49286	0.135473	0.449788
ENSG00000204138	1:28499678:28499678:1	1	28499678	1	57.9832	9	3'UTR (1), downstream (1)	7637.93	0.137619	0.103176	1.33383	0.182259	0.372509	5506.54	-0.317065	0.212387	-1.49286	0.135473	0.449788
ENSG00000204138	1:28499738:28499738:1	1	28499738	1	5.21739	9	3'UTR (1), downstream (1)	7637.93	0.137619	0.103176	1.33383	0.182259	0.372509	5506.54	-0.317065	0.212387	-1.49286	0.135473	0.449788
ENSG00000180198	1:28509335:28509335:1	1	28509335	1	4.51977	13	intron (2), upstream (2)	7434.06	-0.169094	0.114697	-1.47427	0.14041	0.313071	6012.01	-0.116801	0.158293	-0.737879	0.460588	0.753812
ENSG00000242125	1:28509335:28509335:1	1	28509335	1	4.51977	3	exon (1)	5957.02	0.278634	0.111463	2.49979	0.0124269	0.0521911	13322.4	1.15477	0.220786	5.23027	1.69266e-07	0.000111514
ENSG00000180198	1:28509425:28509425:1	1	28509425	1	5.52147	13	intron (2), upstream (2)	7434.06	-0.169094	0.114697	-1.47427	0.14041	0.313071	6012.01	-0.116801	0.158293	-0.737879	0.460588	0.753812
ENSG00000242125	1:28509425:28509425:1	1	28509425	1	5.52147	3	exon (1)	5957.02	0.278634	0.111463	2.49979	0.0124269	0.0521911	13322.4	1.15477	0.220786	5.23027	1.69266e-07	0.000111514
ENSG00000180198	1:28510360:28510360:1	1	28510360	1	11.3636	13	intron (2), upstream (2)	7434.06	-0.169094	0.114697	-1.47427	0.14041	0.313071	6012.01	-0.116801	0.158293	-0.737879	0.460588	0.753812
ENSG00000242125	1:28510360:28510360:1	1	28510360	1	11.3636	3	exon (1)	5957.02	0.278634	0.111463	2.49979	0.0124269	0.0521911	13322.4	1.15477	0.220786	5.23027	1.69266e-07	0.000111514
ENSG00000162419	1:28715344:28715344:1	1	28715344	1	20	4	3'UTR (1), downstream (1)	1527.83	-0.32738	0.121512	-2.69422	0.00705541	0.0332938	1297.84	-0.320803	0.199216	-1.61033	0.107326	0.398086
ENSG00000116350	1:29172551:29172551:-1	1	29172551	-1	32	8	intron (1)	6792.87	-0.0176256	0.104251	-0.169068	0.865743	0.934499	3911.21	-0.108866	0.175096	-0.621748	0.534107	0.798334
ENSG00000116353	1:29193122:29193122:-1	1	29193122	-1	14.2857	18	3'UTR (1), downstream (1)	921.321	-0.0135487	0.120433	-0.1125	0.910427	0.957176	1455.87	-0.112887	0.185868	-0.607353	0.543616	0.803361
ENSG00000160058	1:32367938:32367938:-1	1	32367938	-1	23.3333	16	3'UTR (1), intron (5)	3967.03	-0.145739	0.103717	-1.40516	0.159972	0.341952	3809.47	0.161354	0.195306	0.82616	0.408713	0.720183
ENSG00000160058	1:32367939:32367939:-1	1	32367939	-1	17.2414	16	3'UTR (1), intron (5)	3967.03	-0.145739	0.103717	-1.40516	0.159972	0.341952	3809.47	0.161354	0.195306	0.82616	0.408713	0.720183
ENSG00000160058	1:32367940:32367940:-1	1	32367940	-1	12.9032	16	3'UTR (1), intron (5)	3967.03	-0.145739	0.103717	-1.40516	0.159972	0.341952	3809.47	0.161354	0.195306	0.82616	0.408713	0.720183
ENSG00000176261	1:32621211:32621211:-1	1	32621211	-1	21.4286	15	3'UTR (1), downstream (4)	2841.1	-0.0263439	0.111711	-0.235821	0.813572	0.90653	7862.51	0.0273285	0.203752	0.134126	0.893303	0.959308
ENSG00000176261	1:32621275:32621275:-1	1	32621275	-1	10.8696	15	3'UTR (1), downstream (4)	2841.1	-0.0263439	0.111711	-0.235821	0.813572	0.90653	7862.51	0.0273285	0.203752	0.134126	0.893303	0.959308
ENSG00000162521	1:32673502:32673502:1	1	32673502	1	21.875	19	intron (3)	15975.2	-0.0861671	0.107445	-0.801966	0.422573	0.633077	10358.3	-0.485396	0.172979	-2.8061	0.00501454	0.0699357
ENSG00000162521	1:32675956:32675956:1	1	32675956	1	26.9231	19	intron (3)	15975.2	-0.0861671	0.107445	-0.801966	0.422573	0.633077	10358.3	-0.485396	0.172979	-2.8061	0.00501454	0.0699357
ENSG00000162521	1:32675976:32675976:1	1	32675976	1	20	19	intron (3)	15975.2	-0.0861671	0.107445	-0.801966	0.422573	0.633077	10358.3	-0.485396	0.172979	-2.8061	0.00501454	0.0699357
ENSG00000162521	1:32678256:32678256:1	1	32678256	1	17.8571	19	intron (3)	15975.2	-0.0861671	0.107445	-0.801966	0.422573	0.633077	10358.3	-0.485396	0.172979	-2.8061	0.00501454	0.0699357
ENSG00000162521	1:32678825:32678825:1	1	32678825	1	19.0476	19	intron (3)	15975.2	-0.0861671	0.107445	-0.801966	0.422573	0.633077	10358.3	-0.485396	0.172979	-2.8061	0.00501454	0.0699357
ENSG00000162521	1:32678842:32678842:1	1	32678842	1	24.2424	19	intron (3)	15975.2	-0.0861671	0.107445	-0.801966	0.422573	0.633077	10358.3	-0.485396	0.172979	-2.8061	0.00501454	0.0699357
ENSG00000162521	1:32682314:32682314:1	1	32682314	1	6.79612	19	3'UTR (1), downstream (2)	15975.2	-0.0861671	0.107445	-0.801966	0.422573	0.633077	10358.3	-0.485396	0.172979	-2.8061	0.00501454	0.0699357
ENSG00000162521	1:32682327:32682327:1	1	32682327	1	12.6316	19	3'UTR (1), downstream (2)	15975.2	-0.0861671	0.107445	-0.801966	0.422573	0.633077	10358.3	-0.485396	0.172979	-2.8061	0.00501454	0.0699357
ENSG00000162521	1:32682495:32682495:1	1	32682495	1	22.7273	19	3'UTR (1), downstream (2)	15975.2	-0.0861671	0.107445	-0.801966	0.422573	0.633077	10358.3	-0.485396	0.172979	-2.8061	0.00501454	0.0699357
ENSG00000162521	1:32682517:32682517:1	1	32682517	1	14.5833	19	3'UTR (1), downstream (2)	15975.2	-0.0861671	0.107445	-0.801966	0.422573	0.633077	10358.3	-0.485396	0.172979	-2.8061	0.00501454	0.0699357
ENSG00000162521	1:32682585:32682585:1	1	32682585	1	8.86076	19	3'UTR (1), downstream (2)	15975.2	-0.0861671	0.107445	-0.801966	0.422573	0.633077	10358.3	-0.485396	0.172979	-2.8061	0.00501454	0.0699357
ENSG00000162521	1:32682609:32682609:1	1	32682609	1	8.33333	19	3'UTR (1), downstream (2)	15975.2	-0.0861671	0.107445	-0.801966	0.422573	0.633077	10358.3	-0.485396	0.172979	-2.8061	0.00501454	0.0699357
ENSG00000162521	1:32682613:32682613:1	1	32682613	1	9.30233	19	3'UTR (1), downstream (2)	15975.2	-0.0861671	0.107445	-0.801966	0.422573	0.633077	10358.3	-0.485396	0.172979	-2.8061	0.00501454	0.0699357
ENSG00000162521	1:32682615:32682615:1	1	32682615	1	12.9412	19	3'UTR (1), downstream (2)	15975.2	-0.0861671	0.107445	-0.801966	0.422573	0.633077	10358.3	-0.485396	0.172979	-2.8061	0.00501454	0.0699357
ENSG00000162521	1:32682624:32682624:1	1	32682624	1	5.49451	19	3'UTR (1), downstream (2)	15975.2	-0.0861671	0.107445	-0.801966	0.422573	0.633077	10358.3	-0.485396	0.172979	-2.8061	0.00501454	0.0699357
ENSG00000162521	1:32682683:32682683:1	1	32682683	1	7.79221	19	3'UTR (1), downstream (2)	15975.2	-0.0861671	0.107445	-0.801966	0.422573	0.633077	10358.3	-0.485396	0.172979	-2.8061	0.00501454	0.0699357
ENSG00000162521	1:32683020:32683020:1	1	32683020	1	13.8614	19	3'UTR (1), downstream (2)	15975.2	-0.0861671	0.107445	-0.801966	0.422573	0.633077	10358.3	-0.485396	0.172979	-2.8061	0.00501454	0.0699357
ENSG00000162521	1:32683022:32683022:1	1	32683022	1	58.1633	19	3'UTR (1), downstream (2)	15975.2	-0.0861671	0.107445	-0.801966	0.422573	0.633077	10358.3	-0.485396	0.172979	-2.8061	0.00501454	0.0699357
ENSG00000162521	1:32683034:32683034:1	1	32683034	1	6.54206	19	3'UTR (1), downstream (2)	15975.2	-0.0861671	0.107445	-0.801966	0.422573	0.633077	10358.3	-0.485396	0.172979	-2.8061	0.00501454	0.0699357
ENSG00000162521	1:32683095:32683095:1	1	32683095	1	8.60215	19	3'UTR (1), downstream (2)	15975.2	-0.0861671	0.107445	-0.801966	0.422573	0.633077	10358.3	-0.485396	0.172979	-2.8061	0.00501454	0.0699357
ENSG00000162521	1:32683188:32683188:1	1	32683188	1	50	19	3'UTR (1), downstream (2)	15975.2	-0.0861671	0.107445	-0.801966	0.422573	0.633077	10358.3	-0.485396	0.172979	-2.8061	0.00501454	0.0699357
ENSG00000162521	1:32683655:32683655:1	1	32683655	1	22.9358	19	3'UTR (1), downstream (2)	15975.2	-0.0861671	0.107445	-0.801966	0.422573	0.633077	10358.3	-0.485396	0.172979	-2.8061	0.00501454	0.0699357
ENSG00000162521	1:32683659:32683659:1	1	32683659	1	10	19	3'UTR (1), downstream (2)	15975.2	-0.0861671	0.107445	-0.801966	0.422573	0.633077	10358.3	-0.485396	0.172979	-2.8061	0.00501454	0.0699357
ENSG00000162521	1:32683665:32683665:1	1	32683665	1	31	19	3'UTR (1), downstream (2)	15975.2	-0.0861671	0.107445	-0.801966	0.422573	0.633077	10358.3	-0.485396	0.172979	-2.8061	0.00501454	0.0699357
ENSG00000162521	1:32683732:32683732:1	1	32683732	1	13.8298	19	3'UTR (1), downstream (2)	15975.2	-0.0861671	0.107445	-0.801966	0.422573	0.633077	10358.3	-0.485396	0.172979	-2.8061	0.00501454	0.0699357
ENSG00000162521	1:32683733:32683733:1	1	32683733	1	21.978	19	3'UTR (1), downstream (2)	15975.2	-0.0861671	0.107445	-0.801966	0.422573	0.633077	10358.3	-0.485396	0.172979	-2.8061	0.00501454	0.0699357
ENSG00000162521	1:32683737:32683737:1	1	32683737	1	7.44681	19	3'UTR (1), downstream (2)	15975.2	-0.0861671	0.107445	-0.801966	0.422573	0.633077	10358.3	-0.485396	0.172979	-2.8061	0.00501454	0.0699357
ENSG00000162521	1:32683762:32683762:1	1	32683762	1	14.4578	19	3'UTR (1), downstream (2)	15975.2	-0.0861671	0.107445	-0.801966	0.422573	0.633077	10358.3	-0.485396	0.172979	-2.8061	0.00501454	0.0699357
ENSG00000162521	1:32683772:32683772:1	1	32683772	1	58.3333	19	3'UTR (1), downstream (2)	15975.2	-0.0861671	0.107445	-0.801966	0.422573	0.633077	10358.3	-0.485396	0.172979	-2.8061	0.00501454	0.0699357
ENSG00000162521	1:32683774:32683774:1	1	32683774	1	20.8333	19	3'UTR (1), downstream (2)	15975.2	-0.0861671	0.107445	-0.801966	0.422573	0.633077	10358.3	-0.485396	0.172979	-2.8061	0.00501454	0.0699357
ENSG00000162521	1:32683799:32683799:1	1	32683799	1	8.69565	19	3'UTR (1), downstream (2)	15975.2	-0.0861671	0.107445	-0.801966	0.422573	0.633077	10358.3	-0.485396	0.172979	-2.8061	0.00501454	0.0699357
ENSG00000162521	1:32683895:32683895:1	1	32683895	1	11.1111	19	3'UTR (1), downstream (2)	15975.2	-0.0861671	0.107445	-0.801966	0.422573	0.633077	10358.3	-0.485396	0.172979	-2.8061	0.00501454	0.0699357
ENSG00000162521	1:32683901:32683901:1	1	32683901	1	56.6667	19	3'UTR (1), downstream (2)	15975.2	-0.0861671	0.107445	-0.801966	0.422573	0.633077	10358.3	-0.485396	0.172979	-2.8061	0.00501454	0.0699357
ENSG00000162521	1:32685042:32685042:1	1	32685042	1	7.93651	19	3'UTR (1), downstream (2)	15975.2	-0.0861671	0.107445	-0.801966	0.422573	0.633077	10358.3	-0.485396	0.172979	-2.8061	0.00501454	0.0699357
intergenic	1:35116212:35116212:1	1	35116212	1	14.6341	NA	0	NA	NA	NA	NA	NA	NA	NA	NA	NA	NA	NA	NA
intergenic	1:35116514:35116514:1	1	35116514	1	38.4615	NA	0	NA	NA	NA	NA	NA	NA	NA	NA	NA	NA	NA	NA
intergenic	1:35116519:35116519:1	1	35116519	1	30.7692	NA	0	NA	NA	NA	NA	NA	NA	NA	NA	NA	NA	NA	NA
intergenic	1:35116587:35116587:1	1	35116587	1	17.2414	NA	0	NA	NA	NA	NA	NA	NA	NA	NA	NA	NA	NA	NA
intergenic	1:35116638:35116638:1	1	35116638	1	12.5	NA	0	NA	NA	NA	NA	NA	NA	NA	NA	NA	NA	NA	NA
intergenic	1:35116641:35116641:1	1	35116641	1	10.2564	NA	0	NA	NA	NA	NA	NA	NA	NA	NA	NA	NA	NA	NA
intergenic	1:35116663:35116663:1	1	35116663	1	12.1212	NA	0	NA	NA	NA	NA	NA	NA	NA	NA	NA	NA	NA	NA
intergenic	1:35117336:35117336:1	1	35117336	1	72.7273	NA	0	NA	NA	NA	NA	NA	NA	NA	NA	NA	NA	NA	NA
intergenic	1:35117337:35117337:1	1	35117337	1	40.9091	NA	0	NA	NA	NA	NA	NA	NA	NA	NA	NA	NA	NA	NA
intergenic	1:35117419:35117419:1	1	35117419	1	16.6667	NA	0	NA	NA	NA	NA	NA	NA	NA	NA	NA	NA	NA	NA
intergenic	1:35117420:35117420:1	1	35117420	1	16.6667	NA	0	NA	NA	NA	NA	NA	NA	NA	NA	NA	NA	NA	NA
intergenic	1:35117679:35117679:1	1	35117679	1	24.2424	NA	0	NA	NA	NA	NA	NA	NA	NA	NA	NA	NA	NA	NA
intergenic	1:35117685:35117685:1	1	35117685	1	15.7895	NA	0	NA	NA	NA	NA	NA	NA	NA	NA	NA	NA	NA	NA
intergenic	1:35117686:35117686:1	1	35117686	1	12.1212	NA	0	NA	NA	NA	NA	NA	NA	NA	NA	NA	NA	NA	NA
intergenic	1:35117740:35117740:1	1	35117740	1	16.6667	NA	0	NA	NA	NA	NA	NA	NA	NA	NA	NA	NA	NA	NA
intergenic	1:35117751:35117751:1	1	35117751	1	15.3846	NA	0	NA	NA	NA	NA	NA	NA	NA	NA	NA	NA	NA	NA
intergenic	1:35117755:35117755:1	1	35117755	1	12.8205	NA	0	NA	NA	NA	NA	NA	NA	NA	NA	NA	NA	NA	NA
intergenic	1:35117765:35117765:1	1	35117765	1	17.5	NA	0	NA	NA	NA	NA	NA	NA	NA	NA	NA	NA	NA	NA
intergenic	1:35117819:35117819:1	1	35117819	1	11.1111	NA	0	NA	NA	NA	NA	NA	NA	NA	NA	NA	NA	NA	NA
intergenic	1:35117861:35117861:1	1	35117861	1	12.5	NA	0	NA	NA	NA	NA	NA	NA	NA	NA	NA	NA	NA	NA
intergenic	1:35117971:35117971:1	1	35117971	1	31.3725	NA	0	NA	NA	NA	NA	NA	NA	NA	NA	NA	NA	NA	NA
intergenic	1:35117982:35117982:1	1	35117982	1	10.4167	NA	0	NA	NA	NA	NA	NA	NA	NA	NA	NA	NA	NA	NA
intergenic	1:35117985:35117985:1	1	35117985	1	10.2041	NA	0	NA	NA	NA	NA	NA	NA	NA	NA	NA	NA	NA	NA
ENSG00000126067	1:35599876:35599876:-1	1	35599876	-1	9.375	3	3'UTR (1), downstream (1)	22110	-0.0678103	0.0992454	-0.683259	0.494443	0.691507	21186.7	0.339405	0.189136	1.79451	0.0727322	0.330342
ENSG00000126067	1:35599885:35599885:-1	1	35599885	-1	11.6667	3	3'UTR (1), downstream (1)	22110	-0.0678103	0.0992454	-0.683259	0.494443	0.691507	21186.7	0.339405	0.189136	1.79451	0.0727322	0.330342
ENSG00000126067	1:35599888:35599888:-1	1	35599888	-1	33.9286	3	3'UTR (1), downstream (1)	22110	-0.0678103	0.0992454	-0.683259	0.494443	0.691507	21186.7	0.339405	0.189136	1.79451	0.0727322	0.330342
ENSG00000126067	1:35599889:35599889:-1	1	35599889	-1	40.678	3	3'UTR (1), downstream (1)	22110	-0.0678103	0.0992454	-0.683259	0.494443	0.691507	21186.7	0.339405	0.189136	1.79451	0.0727322	0.330342
ENSG00000126067	1:35599890:35599890:-1	1	35599890	-1	11.6667	3	3'UTR (1), downstream (1)	22110	-0.0678103	0.0992454	-0.683259	0.494443	0.691507	21186.7	0.339405	0.189136	1.79451	0.0727322	0.330342
ENSG00000126067	1:35599903:35599903:-1	1	35599903	-1	24	3	3'UTR (1), downstream (1)	22110	-0.0678103	0.0992454	-0.683259	0.494443	0.691507	21186.7	0.339405	0.189136	1.79451	0.0727322	0.330342
ENSG00000126067	1:35599915:35599915:-1	1	35599915	-1	21.8182	3	3'UTR (1), downstream (1)	22110	-0.0678103	0.0992454	-0.683259	0.494443	0.691507	21186.7	0.339405	0.189136	1.79451	0.0727322	0.330342
ENSG00000126067	1:35599928:35599928:-1	1	35599928	-1	35.4839	3	3'UTR (1), downstream (1)	22110	-0.0678103	0.0992454	-0.683259	0.494443	0.691507	21186.7	0.339405	0.189136	1.79451	0.0727322	0.330342
ENSG00000126067	1:35600041:35600041:-1	1	35600041	-1	8.06452	3	3'UTR (1), downstream (1)	22110	-0.0678103	0.0992454	-0.683259	0.494443	0.691507	21186.7	0.339405	0.189136	1.79451	0.0727322	0.330342
ENSG00000126067	1:35600053:35600053:-1	1	35600053	-1	12.963	3	3'UTR (1), downstream (1)	22110	-0.0678103	0.0992454	-0.683259	0.494443	0.691507	21186.7	0.339405	0.189136	1.79451	0.0727322	0.330342
ENSG00000126067	1:35600054:35600054:-1	1	35600054	-1	10.9091	3	3'UTR (1), downstream (1)	22110	-0.0678103	0.0992454	-0.683259	0.494443	0.691507	21186.7	0.339405	0.189136	1.79451	0.0727322	0.330342
ENSG00000126067	1:35600099:35600099:-1	1	35600099	-1	15.6863	3	3'UTR (1), downstream (1)	22110	-0.0678103	0.0992454	-0.683259	0.494443	0.691507	21186.7	0.339405	0.189136	1.79451	0.0727322	0.330342
ENSG00000126067	1:35600107:35600107:-1	1	35600107	-1	80	3	3'UTR (1), downstream (1)	22110	-0.0678103	0.0992454	-0.683259	0.494443	0.691507	21186.7	0.339405	0.189136	1.79451	0.0727322	0.330342
ENSG00000126067	1:35600124:35600124:-1	1	35600124	-1	38.6364	3	3'UTR (1), downstream (1)	22110	-0.0678103	0.0992454	-0.683259	0.494443	0.691507	21186.7	0.339405	0.189136	1.79451	0.0727322	0.330342
ENSG00000126067	1:35600137:35600137:-1	1	35600137	-1	40.4255	3	3'UTR (1), downstream (1)	22110	-0.0678103	0.0992454	-0.683259	0.494443	0.691507	21186.7	0.339405	0.189136	1.79451	0.0727322	0.330342
ENSG00000126067	1:35601164:35601164:-1	1	35601164	-1	37.931	3	3'UTR (1), downstream (1)	22110	-0.0678103	0.0992454	-0.683259	0.494443	0.691507	21186.7	0.339405	0.189136	1.79451	0.0727322	0.330342
ENSG00000126067	1:35601178:35601178:-1	1	35601178	-1	14.6341	3	3'UTR (1), downstream (1)	22110	-0.0678103	0.0992454	-0.683259	0.494443	0.691507	21186.7	0.339405	0.189136	1.79451	0.0727322	0.330342
ENSG00000126067	1:35601182:35601182:-1	1	35601182	-1	29.7872	3	3'UTR (1), downstream (1)	22110	-0.0678103	0.0992454	-0.683259	0.494443	0.691507	21186.7	0.339405	0.189136	1.79451	0.0727322	0.330342
ENSG00000126067	1:35601198:35601198:-1	1	35601198	-1	20.4082	3	3'UTR (1), downstream (1)	22110	-0.0678103	0.0992454	-0.683259	0.494443	0.691507	21186.7	0.339405	0.189136	1.79451	0.0727322	0.330342
ENSG00000126067	1:35601204:35601204:-1	1	35601204	-1	23.7288	3	3'UTR (1), downstream (1)	22110	-0.0678103	0.0992454	-0.683259	0.494443	0.691507	21186.7	0.339405	0.189136	1.79451	0.0727322	0.330342
ENSG00000126067	1:35601227:35601227:-1	1	35601227	-1	16.0714	3	3'UTR (1), downstream (1)	22110	-0.0678103	0.0992454	-0.683259	0.494443	0.691507	21186.7	0.339405	0.189136	1.79451	0.0727322	0.330342
ENSG00000126067	1:35601290:35601290:-1	1	35601290	-1	18	3	3'UTR (1), downstream (1)	22110	-0.0678103	0.0992454	-0.683259	0.494443	0.691507	21186.7	0.339405	0.189136	1.79451	0.0727322	0.330342
ENSG00000126067	1:35602113:35602113:-1	1	35602113	-1	5.6338	3	3'UTR (2)	22110	-0.0678103	0.0992454	-0.683259	0.494443	0.691507	21186.7	0.339405	0.189136	1.79451	0.0727322	0.330342
ENSG00000126067	1:35602126:35602126:-1	1	35602126	-1	3.79747	3	3'UTR (2)	22110	-0.0678103	0.0992454	-0.683259	0.494443	0.691507	21186.7	0.339405	0.189136	1.79451	0.0727322	0.330342
ENSG00000126067	1:35602148:35602148:-1	1	35602148	-1	12.3529	3	3'UTR (2)	22110	-0.0678103	0.0992454	-0.683259	0.494443	0.691507	21186.7	0.339405	0.189136	1.79451	0.0727322	0.330342
ENSG00000126067	1:35602151:35602151:-1	1	35602151	-1	11.1765	3	3'UTR (2)	22110	-0.0678103	0.0992454	-0.683259	0.494443	0.691507	21186.7	0.339405	0.189136	1.79451	0.0727322	0.330342
ENSG00000126067	1:35602165:35602165:-1	1	35602165	-1	4.97238	3	3'UTR (2)	22110	-0.0678103	0.0992454	-0.683259	0.494443	0.691507	21186.7	0.339405	0.189136	1.79451	0.0727322	0.330342
ENSG00000126067	1:35602183:35602183:-1	1	35602183	-1	38.6667	3	3'UTR (2)	22110	-0.0678103	0.0992454	-0.683259	0.494443	0.691507	21186.7	0.339405	0.189136	1.79451	0.0727322	0.330342
ENSG00000126067	1:35602208:35602208:-1	1	35602208	-1	5.96026	3	3'UTR (2)	22110	-0.0678103	0.0992454	-0.683259	0.494443	0.691507	21186.7	0.339405	0.189136	1.79451	0.0727322	0.330342
ENSG00000126067	1:35602237:35602237:-1	1	35602237	-1	39.0625	3	3'UTR (2)	22110	-0.0678103	0.0992454	-0.683259	0.494443	0.691507	21186.7	0.339405	0.189136	1.79451	0.0727322	0.330342
ENSG00000126067	1:35602324:35602324:-1	1	35602324	-1	40.3226	3	3'UTR (2)	22110	-0.0678103	0.0992454	-0.683259	0.494443	0.691507	21186.7	0.339405	0.189136	1.79451	0.0727322	0.330342
ENSG00000126067	1:35602565:35602565:-1	1	35602565	-1	8.66142	3	3'UTR (2)	22110	-0.0678103	0.0992454	-0.683259	0.494443	0.691507	21186.7	0.339405	0.189136	1.79451	0.0727322	0.330342
ENSG00000126067	1:35602595:35602595:-1	1	35602595	-1	7.93651	3	3'UTR (2)	22110	-0.0678103	0.0992454	-0.683259	0.494443	0.691507	21186.7	0.339405	0.189136	1.79451	0.0727322	0.330342
ENSG00000126067	1:35602609:35602609:-1	1	35602609	-1	34.3284	3	3'UTR (2)	22110	-0.0678103	0.0992454	-0.683259	0.494443	0.691507	21186.7	0.339405	0.189136	1.79451	0.0727322	0.330342
ENSG00000126067	1:35602626:35602626:-1	1	35602626	-1	5.59441	3	3'UTR (2)	22110	-0.0678103	0.0992454	-0.683259	0.494443	0.691507	21186.7	0.339405	0.189136	1.79451	0.0727322	0.330342
ENSG00000126067	1:35602630:35602630:-1	1	35602630	-1	46.0993	3	3'UTR (2)	22110	-0.0678103	0.0992454	-0.683259	0.494443	0.691507	21186.7	0.339405	0.189136	1.79451	0.0727322	0.330342
ENSG00000126067	1:35602636:35602636:-1	1	35602636	-1	20.6667	3	3'UTR (2)	22110	-0.0678103	0.0992454	-0.683259	0.494443	0.691507	21186.7	0.339405	0.189136	1.79451	0.0727322	0.330342
ENSG00000126067	1:35602674:35602674:-1	1	35602674	-1	22.0859	3	3'UTR (2)	22110	-0.0678103	0.0992454	-0.683259	0.494443	0.691507	21186.7	0.339405	0.189136	1.79451	0.0727322	0.330342
ENSG00000126067	1:35602675:35602675:-1	1	35602675	-1	24.0741	3	3'UTR (2)	22110	-0.0678103	0.0992454	-0.683259	0.494443	0.691507	21186.7	0.339405	0.189136	1.79451	0.0727322	0.330342
ENSG00000126067	1:35602676:35602676:-1	1	35602676	-1	7.69231	3	3'UTR (2)	22110	-0.0678103	0.0992454	-0.683259	0.494443	0.691507	21186.7	0.339405	0.189136	1.79451	0.0727322	0.330342
ENSG00000126067	1:35602677:35602677:-1	1	35602677	-1	21.0843	3	3'UTR (2)	22110	-0.0678103	0.0992454	-0.683259	0.494443	0.691507	21186.7	0.339405	0.189136	1.79451	0.0727322	0.330342
ENSG00000126067	1:35602680:35602680:-1	1	35602680	-1	12.8834	3	3'UTR (2)	22110	-0.0678103	0.0992454	-0.683259	0.494443	0.691507	21186.7	0.339405	0.189136	1.79451	0.0727322	0.330342
ENSG00000126067	1:35602694:35602694:-1	1	35602694	-1	29.0909	3	3'UTR (2)	22110	-0.0678103	0.0992454	-0.683259	0.494443	0.691507	21186.7	0.339405	0.189136	1.79451	0.0727322	0.330342
ENSG00000126067	1:35602724:35602724:-1	1	35602724	-1	32.3353	3	3'UTR (2)	22110	-0.0678103	0.0992454	-0.683259	0.494443	0.691507	21186.7	0.339405	0.189136	1.79451	0.0727322	0.330342
ENSG00000126067	1:35602768:35602768:-1	1	35602768	-1	15.0327	3	3'UTR (2)	22110	-0.0678103	0.0992454	-0.683259	0.494443	0.691507	21186.7	0.339405	0.189136	1.79451	0.0727322	0.330342
ENSG00000126067	1:35602769:35602769:-1	1	35602769	-1	25	3	3'UTR (2)	22110	-0.0678103	0.0992454	-0.683259	0.494443	0.691507	21186.7	0.339405	0.189136	1.79451	0.0727322	0.330342
ENSG00000126070	1:36068423:36068423:1	1	36068423	1	28	7	3'UTR (1), downstream (1)	2159.98	0.0284916	0.112947	0.252257	0.800843	0.8995	1225.75	-0.402021	0.197043	-2.04027	0.0413233	0.243591
ENSG00000126070	1:36069135:36069135:1	1	36069135	1	28	7	3'UTR (1), downstream (1)	2159.98	0.0284916	0.112947	0.252257	0.800843	0.8995	1225.75	-0.402021	0.197043	-2.04027	0.0413233	0.243591
ENSG00000126070	1:36069162:36069162:1	1	36069162	1	50	7	3'UTR (1), downstream (1)	2159.98	0.0284916	0.112947	0.252257	0.800843	0.8995	1225.75	-0.402021	0.197043	-2.04027	0.0413233	0.243591
ENSG00000126070	1:36069181:36069181:1	1	36069181	1	57.6923	7	3'UTR (1), downstream (1)	2159.98	0.0284916	0.112947	0.252257	0.800843	0.8995	1225.75	-0.402021	0.197043	-2.04027	0.0413233	0.243591
ENSG00000126070	1:36069205:36069205:1	1	36069205	1	20	7	3'UTR (1), downstream (1)	2159.98	0.0284916	0.112947	0.252257	0.800843	0.8995	1225.75	-0.402021	0.197043	-2.04027	0.0413233	0.243591
ENSG00000126070	1:36069221:36069221:1	1	36069221	1	42.8571	7	3'UTR (1), downstream (1)	2159.98	0.0284916	0.112947	0.252257	0.800843	0.8995	1225.75	-0.402021	0.197043	-2.04027	0.0413233	0.243591
ENSG00000126070	1:36069937:36069937:1	1	36069937	1	36.6667	7	3'UTR (1), downstream (1)	2159.98	0.0284916	0.112947	0.252257	0.800843	0.8995	1225.75	-0.402021	0.197043	-2.04027	0.0413233	0.243591
ENSG00000126070	1:36069958:36069958:1	1	36069958	1	47.619	7	3'UTR (1), downstream (1)	2159.98	0.0284916	0.112947	0.252257	0.800843	0.8995	1225.75	-0.402021	0.197043	-2.04027	0.0413233	0.243591
ENSG00000126070	1:36069959:36069959:1	1	36069959	1	27.2727	7	3'UTR (1), downstream (1)	2159.98	0.0284916	0.112947	0.252257	0.800843	0.8995	1225.75	-0.402021	0.197043	-2.04027	0.0413233	0.243591
ENSG00000116898	1:36459250:36459250:-1	1	36459250	-1	13.8889	4	intron (1)	5470.93	0.0862911	0.113798	0.75828	0.448283	0.654309	10707.6	0.0851119	0.189707	0.448649	0.653685	0.864353
ENSG00000130764	1:3785972:3785972:-1	1	3785972	-1	10.5263	3	intron (1)	2833.82	-0.193838	0.111723	-1.73498	0.0827443	0.215191	1853.83	-0.249603	0.148756	-1.67794	0.093359	0.36961
ENSG00000204084	1:37861033:37861033:-1	1	37861033	-1	11.1111	11	3'UTR (1), downstream (1)	1019.2	-0.101017	0.129896	-0.777677	0.436759	0.645128	881.401	-0.237603	0.165945	-1.43182	0.152195	0.472781
ENSG00000204084	1:37861056:37861056:-1	1	37861056	-1	42.5532	11	3'UTR (1), downstream (1)	1019.2	-0.101017	0.129896	-0.777677	0.436759	0.645128	881.401	-0.237603	0.165945	-1.43182	0.152195	0.472781
ENSG00000204084	1:37861912:37861912:-1	1	37861912	-1	57.1429	11	3'UTR (1), downstream (1)	1019.2	-0.101017	0.129896	-0.777677	0.436759	0.645128	881.401	-0.237603	0.165945	-1.43182	0.152195	0.472781
ENSG00000116198	1:3813764:3813764:-1	1	3813764	-1	13.7931	11	3'UTR (1)	2056.57	-0.0380083	0.116198	-0.327101	0.743592	0.864613	1478.42	-0.22306	0.205759	-1.08409	0.278327	0.610827
ENSG00000116198	1:3813767:3813767:-1	1	3813767	-1	58.6207	11	3'UTR (1)	2056.57	-0.0380083	0.116198	-0.327101	0.743592	0.864613	1478.42	-0.22306	0.205759	-1.08409	0.278327	0.610827
ENSG00000116198	1:3813768:3813768:-1	1	3813768	-1	32.1429	11	3'UTR (1)	2056.57	-0.0380083	0.116198	-0.327101	0.743592	0.864613	1478.42	-0.22306	0.205759	-1.08409	0.278327	0.610827
ENSG00000116198	1:3813836:3813836:-1	1	3813836	-1	82.9268	11	3'UTR (1)	2056.57	-0.0380083	0.116198	-0.327101	0.743592	0.864613	1478.42	-0.22306	0.205759	-1.08409	0.278327	0.610827
ENSG00000174574	1:38994606:38994606:1	1	38994606	1	17.2414	4	intron (2)	7555.43	-0.0519587	0.110372	-0.470761	0.637811	0.798612	8936.3	0.279936	0.137116	2.04161	0.0411902	0.243325
ENSG00000174574	1:38995954:38995954:1	1	38995954	1	20.8333	4	intron (2)	7555.43	-0.0519587	0.110372	-0.470761	0.637811	0.798612	8936.3	0.279936	0.137116	2.04161	0.0411902	0.243325
ENSG00000174574	1:38996194:38996194:1	1	38996194	1	51.8519	4	intron (2)	7555.43	-0.0519587	0.110372	-0.470761	0.637811	0.798612	8936.3	0.279936	0.137116	2.04161	0.0411902	0.243325
ENSG00000174574	1:38996199:38996199:1	1	38996199	1	23.0769	4	intron (2)	7555.43	-0.0519587	0.110372	-0.470761	0.637811	0.798612	8936.3	0.279936	0.137116	2.04161	0.0411902	0.243325
ENSG00000174574	1:38996234:38996234:1	1	38996234	1	28	4	intron (2)	7555.43	-0.0519587	0.110372	-0.470761	0.637811	0.798612	8936.3	0.279936	0.137116	2.04161	0.0411902	0.243325
ENSG00000174574	1:38996659:38996659:1	1	38996659	1	25.9259	4	intron (2)	7555.43	-0.0519587	0.110372	-0.470761	0.637811	0.798612	8936.3	0.279936	0.137116	2.04161	0.0411902	0.243325
ENSG00000010803	1:41039577:41039577:-1	1	41039577	-1	31.5789	17	intron (8)	2450.53	-0.251164	0.114539	-2.19282	0.0283201	0.0974019	4592.48	-0.000486714	0.13256	-0.00367164	0.99707	0.999038
ENSG00000010803	1:41039586:41039586:-1	1	41039586	-1	27.027	17	intron (8)	2450.53	-0.251164	0.114539	-2.19282	0.0283201	0.0974019	4592.48	-0.000486714	0.13256	-0.00367164	0.99707	0.999038
ENSG00000010803	1:41039588:41039588:-1	1	41039588	-1	17.1429	17	intron (8)	2450.53	-0.251164	0.114539	-2.19282	0.0283201	0.0974019	4592.48	-0.000486714	0.13256	-0.00367164	0.99707	0.999038
ENSG00000171960	1:42668954:42668954:1	1	42668954	1	29.1667	6	downstream (1), intron (1)	1865.81	-0.202011	0.110019	-1.83615	0.0663361	0.183318	2692.42	0.245212	0.241509	1.01533	0.309947	0.641645
ENSG00000171960	1:42669067:42669067:1	1	42669067	1	21.0526	6	downstream (1), intron (1)	1865.81	-0.202011	0.110019	-1.83615	0.0663361	0.183318	2692.42	0.245212	0.241509	1.01533	0.309947	0.641645
ENSG00000171960	1:42669435:42669435:1	1	42669435	1	69.5652	6	downstream (1), intron (1)	1865.81	-0.202011	0.110019	-1.83615	0.0663361	0.183318	2692.42	0.245212	0.241509	1.01533	0.309947	0.641645
ENSG00000171960	1:42670961:42670961:1	1	42670961	1	10.8108	6	downstream (1), intron (1)	1865.81	-0.202011	0.110019	-1.83615	0.0663361	0.183318	2692.42	0.245212	0.241509	1.01533	0.309947	0.641645
ENSG00000171960	1:42671250:42671250:1	1	42671250	1	24.3243	6	downstream (1), intron (1)	1865.81	-0.202011	0.110019	-1.83615	0.0663361	0.183318	2692.42	0.245212	0.241509	1.01533	0.309947	0.641645
ENSG00000171960	1:42671263:42671263:1	1	42671263	1	36.8421	6	downstream (1), intron (1)	1865.81	-0.202011	0.110019	-1.83615	0.0663361	0.183318	2692.42	0.245212	0.241509	1.01533	0.309947	0.641645
ENSG00000171960	1:42671266:42671266:1	1	42671266	1	19.4444	6	downstream (1), intron (1)	1865.81	-0.202011	0.110019	-1.83615	0.0663361	0.183318	2692.42	0.245212	0.241509	1.01533	0.309947	0.641645
ENSG00000171960	1:42671267:42671267:1	1	42671267	1	12.1951	6	downstream (1), intron (1)	1865.81	-0.202011	0.110019	-1.83615	0.0663361	0.183318	2692.42	0.245212	0.241509	1.01533	0.309947	0.641645
ENSG00000171960	1:42671354:42671354:1	1	42671354	1	17.1429	6	downstream (1), intron (1)	1865.81	-0.202011	0.110019	-1.83615	0.0663361	0.183318	2692.42	0.245212	0.241509	1.01533	0.309947	0.641645
ENSG00000171960	1:42671393:42671393:1	1	42671393	1	25.641	6	downstream (1), intron (1)	1865.81	-0.202011	0.110019	-1.83615	0.0663361	0.183318	2692.42	0.245212	0.241509	1.01533	0.309947	0.641645
ENSG00000132763	1:45509578:45509578:1	1	45509578	1	28.5714	3	3'UTR (1), intron (1)	1501.36	-0.0602252	0.11996	-0.502045	0.615636	0.784103	2342.9	-0.0804186	0.194335	-0.413814	0.67901	0.877464
ENSG00000132763	1:45509597:45509597:1	1	45509597	1	30.303	3	3'UTR (1), intron (1)	1501.36	-0.0602252	0.11996	-0.502045	0.615636	0.784103	2342.9	-0.0804186	0.194335	-0.413814	0.67901	0.877464
ENSG00000132763	1:45509673:45509673:1	1	45509673	1	22.2222	3	3'UTR (1), intron (1)	1501.36	-0.0602252	0.11996	-0.502045	0.615636	0.784103	2342.9	-0.0804186	0.194335	-0.413814	0.67901	0.877464
ENSG00000132763	1:45509826:45509826:1	1	45509826	1	10.8108	3	3'UTR (1), intron (1)	1501.36	-0.0602252	0.11996	-0.502045	0.615636	0.784103	2342.9	-0.0804186	0.194335	-0.413814	0.67901	0.877464
ENSG00000132763	1:45509827:45509827:1	1	45509827	1	13.5135	3	3'UTR (1), intron (1)	1501.36	-0.0602252	0.11996	-0.502045	0.615636	0.784103	2342.9	-0.0804186	0.194335	-0.413814	0.67901	0.877464
ENSG00000132763	1:45509900:45509900:1	1	45509900	1	10.2941	3	3'UTR (1), intron (1)	1501.36	-0.0602252	0.11996	-0.502045	0.615636	0.784103	2342.9	-0.0804186	0.194335	-0.413814	0.67901	0.877464
ENSG00000132763	1:45509902:45509902:1	1	45509902	1	30.4348	3	3'UTR (1), intron (1)	1501.36	-0.0602252	0.11996	-0.502045	0.615636	0.784103	2342.9	-0.0804186	0.194335	-0.413814	0.67901	0.877464
ENSG00000132763	1:45509966:45509966:1	1	45509966	1	12.1212	3	3'UTR (1), intron (1)	1501.36	-0.0602252	0.11996	-0.502045	0.615636	0.784103	2342.9	-0.0804186	0.194335	-0.413814	0.67901	0.877464
ENSG00000132763	1:45509997:45509997:1	1	45509997	1	25	3	3'UTR (1), intron (1)	1501.36	-0.0602252	0.11996	-0.502045	0.615636	0.784103	2342.9	-0.0804186	0.194335	-0.413814	0.67901	0.877464
ENSG00000132763	1:45509998:45509998:1	1	45509998	1	53.8462	3	3'UTR (1), intron (1)	1501.36	-0.0602252	0.11996	-0.502045	0.615636	0.784103	2342.9	-0.0804186	0.194335	-0.413814	0.67901	0.877464
ENSG00000132763	1:45510001:45510001:1	1	45510001	1	10	3	3'UTR (1), intron (1)	1501.36	-0.0602252	0.11996	-0.502045	0.615636	0.784103	2342.9	-0.0804186	0.194335	-0.413814	0.67901	0.877464
ENSG00000132780	1:45609932:45609932:1	1	45609932	1	19.0476	25	intron (3)	18315.6	-0.155949	0.0985017	-1.58321	0.113374	0.269427	8115.41	-0.739951	0.181011	-4.08787	4.35353e-05	0.00320378
ENSG00000132780	1:45609940:45609940:1	1	45609940	1	43.8596	25	intron (3)	18315.6	-0.155949	0.0985017	-1.58321	0.113374	0.269427	8115.41	-0.739951	0.181011	-4.08787	4.35353e-05	0.00320378
ENSG00000132780	1:45609960:45609960:1	1	45609960	1	7.8125	25	intron (3)	18315.6	-0.155949	0.0985017	-1.58321	0.113374	0.269427	8115.41	-0.739951	0.181011	-4.08787	4.35353e-05	0.00320378
ENSG00000132780	1:45609989:45609989:1	1	45609989	1	24.2424	25	intron (3)	18315.6	-0.155949	0.0985017	-1.58321	0.113374	0.269427	8115.41	-0.739951	0.181011	-4.08787	4.35353e-05	0.00320378
ENSG00000132780	1:45609991:45609991:1	1	45609991	1	14.2857	25	intron (3)	18315.6	-0.155949	0.0985017	-1.58321	0.113374	0.269427	8115.41	-0.739951	0.181011	-4.08787	4.35353e-05	0.00320378
ENSG00000132780	1:45609992:45609992:1	1	45609992	1	68.5714	25	intron (3)	18315.6	-0.155949	0.0985017	-1.58321	0.113374	0.269427	8115.41	-0.739951	0.181011	-4.08787	4.35353e-05	0.00320378
ENSG00000132780	1:45610013:45610013:1	1	45610013	1	13.7931	25	intron (3)	18315.6	-0.155949	0.0985017	-1.58321	0.113374	0.269427	8115.41	-0.739951	0.181011	-4.08787	4.35353e-05	0.00320378
ENSG00000132780	1:45610108:45610108:1	1	45610108	1	9.25926	25	intron (3)	18315.6	-0.155949	0.0985017	-1.58321	0.113374	0.269427	8115.41	-0.739951	0.181011	-4.08787	4.35353e-05	0.00320378
ENSG00000132780	1:45610790:45610790:1	1	45610790	1	17.2414	25	intron (3)	18315.6	-0.155949	0.0985017	-1.58321	0.113374	0.269427	8115.41	-0.739951	0.181011	-4.08787	4.35353e-05	0.00320378
ENSG00000132780	1:45610795:45610795:1	1	45610795	1	29.5775	25	intron (3)	18315.6	-0.155949	0.0985017	-1.58321	0.113374	0.269427	8115.41	-0.739951	0.181011	-4.08787	4.35353e-05	0.00320378
ENSG00000132780	1:45610796:45610796:1	1	45610796	1	21.4286	25	intron (3)	18315.6	-0.155949	0.0985017	-1.58321	0.113374	0.269427	8115.41	-0.739951	0.181011	-4.08787	4.35353e-05	0.00320378
ENSG00000132780	1:45611596:45611596:1	1	45611596	1	11.7647	25	intron (3)	18315.6	-0.155949	0.0985017	-1.58321	0.113374	0.269427	8115.41	-0.739951	0.181011	-4.08787	4.35353e-05	0.00320378
ENSG00000197429	1:45694997:45694997:-1	1	45694997	-1	27.2727	4	downstream (1), intron (1)	956.928	0.304511	0.12805	2.37807	0.0174036	0.067476	619.594	-0.456594	0.188266	-2.42526	0.0152973	0.139327
ENSG00000197429	1:45695028:45695028:-1	1	45695028	-1	14.8148	4	downstream (1), intron (1)	956.928	0.304511	0.12805	2.37807	0.0174036	0.067476	619.594	-0.456594	0.188266	-2.42526	0.0152973	0.139327
ENSG00000197429	1:45695052:45695052:-1	1	45695052	-1	28	4	downstream (1), intron (1)	956.928	0.304511	0.12805	2.37807	0.0174036	0.067476	619.594	-0.456594	0.188266	-2.42526	0.0152973	0.139327
ENSG00000197429	1:45695219:45695219:-1	1	45695219	-1	26.6667	4	downstream (1), intron (1)	956.928	0.304511	0.12805	2.37807	0.0174036	0.067476	619.594	-0.456594	0.188266	-2.42526	0.0152973	0.139327
ENSG00000197429	1:45695222:45695222:-1	1	45695222	-1	14.2857	4	downstream (1), intron (1)	956.928	0.304511	0.12805	2.37807	0.0174036	0.067476	619.594	-0.456594	0.188266	-2.42526	0.0152973	0.139327
ENSG00000197429	1:45696736:45696736:-1	1	45696736	-1	17.8571	4	downstream (1), intron (1)	956.928	0.304511	0.12805	2.37807	0.0174036	0.067476	619.594	-0.456594	0.188266	-2.42526	0.0152973	0.139327
ENSG00000197429	1:45696741:45696741:-1	1	45696741	-1	60.7143	4	downstream (1), intron (1)	956.928	0.304511	0.12805	2.37807	0.0174036	0.067476	619.594	-0.456594	0.188266	-2.42526	0.0152973	0.139327
ENSG00000197429	1:45696742:45696742:-1	1	45696742	-1	18.5185	4	downstream (1), intron (1)	956.928	0.304511	0.12805	2.37807	0.0174036	0.067476	619.594	-0.456594	0.188266	-2.42526	0.0152973	0.139327
ENSG00000197429	1:45697343:45697343:-1	1	45697343	-1	35.4839	4	downstream (1), intron (1)	956.928	0.304511	0.12805	2.37807	0.0174036	0.067476	619.594	-0.456594	0.188266	-2.42526	0.0152973	0.139327
ENSG00000197429	1:45697353:45697353:-1	1	45697353	-1	33.3333	4	downstream (1), intron (1)	956.928	0.304511	0.12805	2.37807	0.0174036	0.067476	619.594	-0.456594	0.188266	-2.42526	0.0152973	0.139327
ENSG00000197429	1:45697388:45697388:-1	1	45697388	-1	32	4	downstream (1), intron (1)	956.928	0.304511	0.12805	2.37807	0.0174036	0.067476	619.594	-0.456594	0.188266	-2.42526	0.0152973	0.139327
ENSG00000197429	1:45697470:45697470:-1	1	45697470	-1	17.6471	4	downstream (1), intron (1)	956.928	0.304511	0.12805	2.37807	0.0174036	0.067476	619.594	-0.456594	0.188266	-2.42526	0.0152973	0.139327
ENSG00000197429	1:45697471:45697471:-1	1	45697471	-1	23.5294	4	downstream (1), intron (1)	956.928	0.304511	0.12805	2.37807	0.0174036	0.067476	619.594	-0.456594	0.188266	-2.42526	0.0152973	0.139327
ENSG00000197429	1:45697479:45697479:-1	1	45697479	-1	20.5882	4	downstream (1), intron (1)	956.928	0.304511	0.12805	2.37807	0.0174036	0.067476	619.594	-0.456594	0.188266	-2.42526	0.0152973	0.139327
ENSG00000197429	1:45697494:45697494:-1	1	45697494	-1	14.2857	4	downstream (1), intron (1)	956.928	0.304511	0.12805	2.37807	0.0174036	0.067476	619.594	-0.456594	0.188266	-2.42526	0.0152973	0.139327
ENSG00000197429	1:45697524:45697524:-1	1	45697524	-1	19.0476	4	downstream (1), intron (1)	956.928	0.304511	0.12805	2.37807	0.0174036	0.067476	619.594	-0.456594	0.188266	-2.42526	0.0152973	0.139327
ENSG00000197429	1:45697714:45697714:-1	1	45697714	-1	30	4	downstream (1), intron (1)	956.928	0.304511	0.12805	2.37807	0.0174036	0.067476	619.594	-0.456594	0.188266	-2.42526	0.0152973	0.139327
ENSG00000197429	1:45697715:45697715:-1	1	45697715	-1	15.3846	4	downstream (1), intron (1)	956.928	0.304511	0.12805	2.37807	0.0174036	0.067476	619.594	-0.456594	0.188266	-2.42526	0.0152973	0.139327
ENSG00000197429	1:45697791:45697791:-1	1	45697791	-1	21.0526	4	downstream (1), intron (1)	956.928	0.304511	0.12805	2.37807	0.0174036	0.067476	619.594	-0.456594	0.188266	-2.42526	0.0152973	0.139327
ENSG00000197429	1:45697794:45697794:-1	1	45697794	-1	10.8108	4	downstream (1), intron (1)	956.928	0.304511	0.12805	2.37807	0.0174036	0.067476	619.594	-0.456594	0.188266	-2.42526	0.0152973	0.139327
ENSG00000197429	1:45697875:45697875:-1	1	45697875	-1	16.6667	4	downstream (1), intron (1)	956.928	0.304511	0.12805	2.37807	0.0174036	0.067476	619.594	-0.456594	0.188266	-2.42526	0.0152973	0.139327
ENSG00000197429	1:45699006:45699006:-1	1	45699006	-1	21.4286	4	3'UTR (1), intron (1)	956.928	0.304511	0.12805	2.37807	0.0174036	0.067476	619.594	-0.456594	0.188266	-2.42526	0.0152973	0.139327
ENSG00000197429	1:45699736:45699736:-1	1	45699736	-1	17.6471	4	3'UTR (1), intron (1)	956.928	0.304511	0.12805	2.37807	0.0174036	0.067476	619.594	-0.456594	0.188266	-2.42526	0.0152973	0.139327
ENSG00000154222	1:52350919:52350919:-1	1	52350919	-1	17.1429	11	3'UTR (1), downstream (1)	2179.18	-0.15341	0.116542	-1.31635	0.188056	0.38063	1460.67	0.0915412	0.169841	0.538983	0.589898	0.832326
ENSG00000085840	1:52373126:52373126:-1	1	52373126	-1	15.3846	2	3'UTR (1)	3440.43	-0.337723	0.106111	-3.18274	0.0014589	0.00913546	1951.27	-0.0171139	0.166721	-0.10265	0.918241	0.968665
ENSG00000162378	1:52823190:52823190:1	1	52823190	1	17.5	2	3'UTR (1)	2974.4	0.114982	0.124438	0.92401	0.355481	0.56965	2148	-0.339731	0.239891	-1.41619	0.15672	0.478257
ENSG00000162378	1:52823198:52823198:1	1	52823198	1	60	2	3'UTR (1)	2974.4	0.114982	0.124438	0.92401	0.355481	0.56965	2148	-0.339731	0.239891	-1.41619	0.15672	0.478257
ENSG00000162378	1:52823222:52823222:1	1	52823222	1	27.451	2	3'UTR (1)	2974.4	0.114982	0.124438	0.92401	0.355481	0.56965	2148	-0.339731	0.239891	-1.41619	0.15672	0.478257
ENSG00000162378	1:52823225:52823225:1	1	52823225	1	37.2549	2	3'UTR (1)	2974.4	0.114982	0.124438	0.92401	0.355481	0.56965	2148	-0.339731	0.239891	-1.41619	0.15672	0.478257
ENSG00000162378	1:52823252:52823252:1	1	52823252	1	43.75	2	3'UTR (1)	2974.4	0.114982	0.124438	0.92401	0.355481	0.56965	2148	-0.339731	0.239891	-1.41619	0.15672	0.478257
ENSG00000162378	1:52823875:52823875:1	1	52823875	1	19.3548	2	3'UTR (1)	2974.4	0.114982	0.124438	0.92401	0.355481	0.56965	2148	-0.339731	0.239891	-1.41619	0.15672	0.478257
ENSG00000162378	1:52824014:52824014:1	1	52824014	1	36.1111	2	3'UTR (1)	2974.4	0.114982	0.124438	0.92401	0.355481	0.56965	2148	-0.339731	0.239891	-1.41619	0.15672	0.478257
ENSG00000162378	1:52824016:52824016:1	1	52824016	1	17.5676	2	3'UTR (1)	2974.4	0.114982	0.124438	0.92401	0.355481	0.56965	2148	-0.339731	0.239891	-1.41619	0.15672	0.478257
ENSG00000162378	1:52824087:52824087:1	1	52824087	1	39.2857	2	3'UTR (1)	2974.4	0.114982	0.124438	0.92401	0.355481	0.56965	2148	-0.339731	0.239891	-1.41619	0.15672	0.478257
ENSG00000162378	1:52824188:52824188:1	1	52824188	1	16	2	3'UTR (1)	2974.4	0.114982	0.124438	0.92401	0.355481	0.56965	2148	-0.339731	0.239891	-1.41619	0.15672	0.478257
ENSG00000162378	1:52824220:52824220:1	1	52824220	1	19.5652	2	3'UTR (1)	2974.4	0.114982	0.124438	0.92401	0.355481	0.56965	2148	-0.339731	0.239891	-1.41619	0.15672	0.478257
ENSG00000162378	1:52825723:52825723:1	1	52825723	1	10.9091	2	3'UTR (1)	2974.4	0.114982	0.124438	0.92401	0.355481	0.56965	2148	-0.339731	0.239891	-1.41619	0.15672	0.478257
ENSG00000162378	1:52825735:52825735:1	1	52825735	1	9.09091	2	3'UTR (1)	2974.4	0.114982	0.124438	0.92401	0.355481	0.56965	2148	-0.339731	0.239891	-1.41619	0.15672	0.478257
ENSG00000162378	1:52825736:52825736:1	1	52825736	1	21.0526	2	3'UTR (1)	2974.4	0.114982	0.124438	0.92401	0.355481	0.56965	2148	-0.339731	0.239891	-1.41619	0.15672	0.478257
ENSG00000162378	1:52825748:52825748:1	1	52825748	1	54.6875	2	3'UTR (1)	2974.4	0.114982	0.124438	0.92401	0.355481	0.56965	2148	-0.339731	0.239891	-1.41619	0.15672	0.478257
ENSG00000162378	1:52825753:52825753:1	1	52825753	1	43.5484	2	3'UTR (1)	2974.4	0.114982	0.124438	0.92401	0.355481	0.56965	2148	-0.339731	0.239891	-1.41619	0.15672	0.478257
ENSG00000162378	1:52825762:52825762:1	1	52825762	1	23.1884	2	3'UTR (1)	2974.4	0.114982	0.124438	0.92401	0.355481	0.56965	2148	-0.339731	0.239891	-1.41619	0.15672	0.478257
ENSG00000162378	1:52825763:52825763:1	1	52825763	1	18.75	2	3'UTR (1)	2974.4	0.114982	0.124438	0.92401	0.355481	0.56965	2148	-0.339731	0.239891	-1.41619	0.15672	0.478257
ENSG00000203995	1:52880897:52880897:1	1	52880897	1	34.7826	3	intron (2)	1582.27	-0.075076	0.112691	-0.666209	0.505278	0.700108	1069.78	-0.0125087	0.188187	-0.0664697	0.947004	0.979923
ENSG00000203995	1:52893501:52893501:1	1	52893501	1	14.2857	3	3'UTR (2)	1582.27	-0.075076	0.112691	-0.666209	0.505278	0.700108	1069.78	-0.0125087	0.188187	-0.0664697	0.947004	0.979923
ENSG00000203995	1:52893509:52893509:1	1	52893509	1	29.4118	3	3'UTR (2)	1582.27	-0.075076	0.112691	-0.666209	0.505278	0.700108	1069.78	-0.0125087	0.188187	-0.0664697	0.947004	0.979923
ENSG00000203995	1:52893510:52893510:1	1	52893510	1	41.1765	3	3'UTR (2)	1582.27	-0.075076	0.112691	-0.666209	0.505278	0.700108	1069.78	-0.0125087	0.188187	-0.0664697	0.947004	0.979923
ENSG00000203995	1:52893515:52893515:1	1	52893515	1	18.6047	3	3'UTR (2)	1582.27	-0.075076	0.112691	-0.666209	0.505278	0.700108	1069.78	-0.0125087	0.188187	-0.0664697	0.947004	0.979923
ENSG00000203995	1:52893589:52893589:1	1	52893589	1	14.5161	3	3'UTR (2)	1582.27	-0.075076	0.112691	-0.666209	0.505278	0.700108	1069.78	-0.0125087	0.188187	-0.0664697	0.947004	0.979923
ENSG00000203995	1:52893603:52893603:1	1	52893603	1	21.8182	3	3'UTR (2)	1582.27	-0.075076	0.112691	-0.666209	0.505278	0.700108	1069.78	-0.0125087	0.188187	-0.0664697	0.947004	0.979923
ENSG00000203995	1:52893604:52893604:1	1	52893604	1	10.9091	3	3'UTR (2)	1582.27	-0.075076	0.112691	-0.666209	0.505278	0.700108	1069.78	-0.0125087	0.188187	-0.0664697	0.947004	0.979923
ENSG00000203995	1:52893605:52893605:1	1	52893605	1	12.2807	3	3'UTR (2)	1582.27	-0.075076	0.112691	-0.666209	0.505278	0.700108	1069.78	-0.0125087	0.188187	-0.0664697	0.947004	0.979923
ENSG00000203995	1:52893606:52893606:1	1	52893606	1	12.069	3	3'UTR (2)	1582.27	-0.075076	0.112691	-0.666209	0.505278	0.700108	1069.78	-0.0125087	0.188187	-0.0664697	0.947004	0.979923
ENSG00000203995	1:52893607:52893607:1	1	52893607	1	12.7273	3	3'UTR (2)	1582.27	-0.075076	0.112691	-0.666209	0.505278	0.700108	1069.78	-0.0125087	0.188187	-0.0664697	0.947004	0.979923
ENSG00000203995	1:52893610:52893610:1	1	52893610	1	17.5439	3	3'UTR (2)	1582.27	-0.075076	0.112691	-0.666209	0.505278	0.700108	1069.78	-0.0125087	0.188187	-0.0664697	0.947004	0.979923
ENSG00000203995	1:52893613:52893613:1	1	52893613	1	60.7143	3	3'UTR (2)	1582.27	-0.075076	0.112691	-0.666209	0.505278	0.700108	1069.78	-0.0125087	0.188187	-0.0664697	0.947004	0.979923
ENSG00000203995	1:52893614:52893614:1	1	52893614	1	14.2857	3	3'UTR (2)	1582.27	-0.075076	0.112691	-0.666209	0.505278	0.700108	1069.78	-0.0125087	0.188187	-0.0664697	0.947004	0.979923
ENSG00000203995	1:52893615:52893615:1	1	52893615	1	14.5455	3	3'UTR (2)	1582.27	-0.075076	0.112691	-0.666209	0.505278	0.700108	1069.78	-0.0125087	0.188187	-0.0664697	0.947004	0.979923
ENSG00000203995	1:52894072:52894072:1	1	52894072	1	48.1481	3	3'UTR (2)	1582.27	-0.075076	0.112691	-0.666209	0.505278	0.700108	1069.78	-0.0125087	0.188187	-0.0664697	0.947004	0.979923
ENSG00000203995	1:52894073:52894073:1	1	52894073	1	29.6296	3	3'UTR (2)	1582.27	-0.075076	0.112691	-0.666209	0.505278	0.700108	1069.78	-0.0125087	0.188187	-0.0664697	0.947004	0.979923
intergenic	1:52900919:52900919:1	1	52900919	1	26.6667	NA	0	NA	NA	NA	NA	NA	NA	NA	NA	NA	NA	NA	NA
intergenic	1:52900958:52900958:1	1	52900958	1	19.3548	NA	0	NA	NA	NA	NA	NA	NA	NA	NA	NA	NA	NA	NA
intergenic	1:52901060:52901060:1	1	52901060	1	12.1212	NA	0	NA	NA	NA	NA	NA	NA	NA	NA	NA	NA	NA	NA
intergenic	1:52901066:52901066:1	1	52901066	1	12.8205	NA	0	NA	NA	NA	NA	NA	NA	NA	NA	NA	NA	NA	NA
intergenic	1:52901103:52901103:1	1	52901103	1	15.1515	NA	0	NA	NA	NA	NA	NA	NA	NA	NA	NA	NA	NA	NA
intergenic	1:52902257:52902257:1	1	52902257	1	14.2857	NA	0	NA	NA	NA	NA	NA	NA	NA	NA	NA	NA	NA	NA
intergenic	1:52902431:52902431:1	1	52902431	1	11.7647	NA	0	NA	NA	NA	NA	NA	NA	NA	NA	NA	NA	NA	NA
intergenic	1:52902480:52902480:1	1	52902480	1	22.2222	NA	0	NA	NA	NA	NA	NA	NA	NA	NA	NA	NA	NA	NA
intergenic	1:52902550:52902550:1	1	52902550	1	12.5	NA	0	NA	NA	NA	NA	NA	NA	NA	NA	NA	NA	NA	NA
ENSG00000121310	1:52912487:52912487:-1	1	52912487	-1	10.8108	26	intron (3)	3287.58	0.344445	0.117748	2.92526	0.00344167	0.018504	1495.43	0.071309	0.28855	0.247129	0.804809	0.930789
ENSG00000121310	1:52912851:52912851:-1	1	52912851	-1	10.8696	26	intron (3)	3287.58	0.344445	0.117748	2.92526	0.00344167	0.018504	1495.43	0.071309	0.28855	0.247129	0.804809	0.930789
ENSG00000121310	1:52917099:52917099:-1	1	52917099	-1	19.2308	26	intron (3)	3287.58	0.344445	0.117748	2.92526	0.00344167	0.018504	1495.43	0.071309	0.28855	0.247129	0.804809	0.930789
ENSG00000121310	1:52917139:52917139:-1	1	52917139	-1	30	26	intron (3)	3287.58	0.344445	0.117748	2.92526	0.00344167	0.018504	1495.43	0.071309	0.28855	0.247129	0.804809	0.930789
ENSG00000116205	1:54099970:54099970:1	1	54099970	1	14.2857	5	3'UTR (1), intron (1)	1128.37	-0.312569	0.160309	-1.94979	0.0512015	0.151672	901.32	-0.344499	0.287063	-1.20008	0.230108	0.564224
ENSG00000243725	1:54727602:54727602:1	1	54727602	1	50	4	intron (1)	77.9183	-0.800082	0.255164	-3.13556	0.00171525	0.0104243	98.5441	0.0505944	0.363434	0.139212	0.889282	0.95812
ENSG00000271723	1:54727602:54727602:1	1	54727602	1	50	4	intron (3)	NA	NA	NA	NA	NA	NA	NA	NA	NA	NA	NA	NA
ENSG00000226476	1:60529084:60529084:-1	1	60529084	-1	20.6897	5	exon (1)	915.453	-0.115448	0.140407	-0.822237	0.410942	0.623707	742.11	-0.223077	0.202587	-1.10114	0.270837	0.601435
ENSG00000226476	1:60529131:60529131:-1	1	60529131	-1	10.5263	5	exon (1)	915.453	-0.115448	0.140407	-0.822237	0.410942	0.623707	742.11	-0.223077	0.202587	-1.10114	0.270837	0.601435
ENSG00000226476	1:60529222:60529222:-1	1	60529222	-1	16.2162	5	exon (1)	915.453	-0.115448	0.140407	-0.822237	0.410942	0.623707	742.11	-0.223077	0.202587	-1.10114	0.270837	0.601435
ENSG00000158286	1:6219890:6219890:1	1	6219890	1	10.1695	9	3'UTR (1)	1203.61	-0.1624	0.183848	-0.883335	0.377055	0.591173	308.264	0.427138	0.203487	2.09909	0.0358087	0.225608
ENSG00000158286	1:6219909:6219909:1	1	6219909	1	9.25926	9	3'UTR (1)	1203.61	-0.1624	0.183848	-0.883335	0.377055	0.591173	308.264	0.427138	0.203487	2.09909	0.0358087	0.225608
ENSG00000116237	1:6222311:6222311:-1	1	6222311	-1	16	4	3'UTR (1)	11011.1	-0.204111	0.104726	-1.94901	0.0512944	0.151825	14503.1	-0.0270598	0.214802	-0.125975	0.899751	0.962336
ENSG00000116237	1:6222323:6222323:-1	1	6222323	-1	27.2727	4	3'UTR (1)	11011.1	-0.204111	0.104726	-1.94901	0.0512944	0.151825	14503.1	-0.0270598	0.214802	-0.125975	0.899751	0.962336
ENSG00000116237	1:6222340:6222340:-1	1	6222340	-1	46.25	4	3'UTR (1)	11011.1	-0.204111	0.104726	-1.94901	0.0512944	0.151825	14503.1	-0.0270598	0.214802	-0.125975	0.899751	0.962336
ENSG00000116237	1:6222341:6222341:-1	1	6222341	-1	23.8095	4	3'UTR (1)	11011.1	-0.204111	0.104726	-1.94901	0.0512944	0.151825	14503.1	-0.0270598	0.214802	-0.125975	0.899751	0.962336
ENSG00000116237	1:6223184:6223184:-1	1	6223184	-1	13.3333	4	3'UTR (1)	11011.1	-0.204111	0.104726	-1.94901	0.0512944	0.151825	14503.1	-0.0270598	0.214802	-0.125975	0.899751	0.962336
ENSG00000162607	1:62449765:62449765:1	1	62449765	1	26.087	4	intron (2)	7054.61	-0.165271	0.123254	-1.3409	0.179953	0.369812	6072.1	-0.508777	0.163674	-3.10847	0.00188057	0.0385448
ENSG00000162408	1:6522976:6522976:-1	1	6522976	-1	10.1449	5	3'UTR (1)	3180.24	-0.0801915	0.124243	-0.64544	0.518642	0.711459	2227.64	-0.45283	0.207535	-2.18194	0.0291138	0.20083
ENSG00000162408	1:6523006:6523006:-1	1	6523006	-1	9.72222	5	3'UTR (1)	3180.24	-0.0801915	0.124243	-0.64544	0.518642	0.711459	2227.64	-0.45283	0.207535	-2.18194	0.0291138	0.20083
ENSG00000162408	1:6523335:6523335:-1	1	6523335	-1	10.4167	5	3'UTR (1)	3180.24	-0.0801915	0.124243	-0.64544	0.518642	0.711459	2227.64	-0.45283	0.207535	-2.18194	0.0291138	0.20083
ENSG00000162408	1:6523467:6523467:-1	1	6523467	-1	10.2564	5	3'UTR (1)	3180.24	-0.0801915	0.124243	-0.64544	0.518642	0.711459	2227.64	-0.45283	0.207535	-2.18194	0.0291138	0.20083
ENSG00000007923	1:6646963:6646963:-1	1	6646963	-1	15	11	intron (1)	5956.45	-0.228987	0.111758	-2.04896	0.0404662	0.126891	4226.84	-0.0833237	0.13419	-0.620937	0.534641	0.79859
ENSG00000007923	1:6647009:6647009:-1	1	6647009	-1	15.6863	11	intron (1)	5956.45	-0.228987	0.111758	-2.04896	0.0404662	0.126891	4226.84	-0.0833237	0.13419	-0.620937	0.534641	0.79859
ENSG00000007923	1:6647039:6647039:-1	1	6647039	-1	20.3125	11	intron (1)	5956.45	-0.228987	0.111758	-2.04896	0.0404662	0.126891	4226.84	-0.0833237	0.13419	-0.620937	0.534641	0.79859
ENSG00000007923	1:6647356:6647356:-1	1	6647356	-1	13.3333	11	intron (1)	5956.45	-0.228987	0.111758	-2.04896	0.0404662	0.126891	4226.84	-0.0833237	0.13419	-0.620937	0.534641	0.79859
ENSG00000007923	1:6647358:6647358:-1	1	6647358	-1	40.7407	11	intron (1)	5956.45	-0.228987	0.111758	-2.04896	0.0404662	0.126891	4226.84	-0.0833237	0.13419	-0.620937	0.534641	0.79859
ENSG00000007923	1:6648608:6648608:-1	1	6648608	-1	9.09091	11	intron (1)	5956.45	-0.228987	0.111758	-2.04896	0.0404662	0.126891	4226.84	-0.0833237	0.13419	-0.620937	0.534641	0.79859
ENSG00000007923	1:6648620:6648620:-1	1	6648620	-1	22.449	11	intron (1)	5956.45	-0.228987	0.111758	-2.04896	0.0404662	0.126891	4226.84	-0.0833237	0.13419	-0.620937	0.534641	0.79859
ENSG00000007923	1:6648621:6648621:-1	1	6648621	-1	11.3208	11	intron (1)	5956.45	-0.228987	0.111758	-2.04896	0.0404662	0.126891	4226.84	-0.0833237	0.13419	-0.620937	0.534641	0.79859
ENSG00000007923	1:6648665:6648665:-1	1	6648665	-1	56.8182	11	intron (1)	5956.45	-0.228987	0.111758	-2.04896	0.0404662	0.126891	4226.84	-0.0833237	0.13419	-0.620937	0.534641	0.79859
ENSG00000007923	1:6648715:6648715:-1	1	6648715	-1	39.6825	11	intron (1)	5956.45	-0.228987	0.111758	-2.04896	0.0404662	0.126891	4226.84	-0.0833237	0.13419	-0.620937	0.534641	0.79859
ENSG00000007923	1:6649068:6649068:-1	1	6649068	-1	20	11	intron (1)	5956.45	-0.228987	0.111758	-2.04896	0.0404662	0.126891	4226.84	-0.0833237	0.13419	-0.620937	0.534641	0.79859
ENSG00000007923	1:6649770:6649770:-1	1	6649770	-1	28.5714	11	intron (1)	5956.45	-0.228987	0.111758	-2.04896	0.0404662	0.126891	4226.84	-0.0833237	0.13419	-0.620937	0.534641	0.79859
ENSG00000007923	1:6649872:6649872:-1	1	6649872	-1	25.9259	11	intron (1)	5956.45	-0.228987	0.111758	-2.04896	0.0404662	0.126891	4226.84	-0.0833237	0.13419	-0.620937	0.534641	0.79859
ENSG00000007923	1:6650152:6650152:-1	1	6650152	-1	19.0476	11	intron (1)	5956.45	-0.228987	0.111758	-2.04896	0.0404662	0.126891	4226.84	-0.0833237	0.13419	-0.620937	0.534641	0.79859
ENSG00000007923	1:6650164:6650164:-1	1	6650164	-1	11.9048	11	intron (1)	5956.45	-0.228987	0.111758	-2.04896	0.0404662	0.126891	4226.84	-0.0833237	0.13419	-0.620937	0.534641	0.79859
ENSG00000007923	1:6650217:6650217:-1	1	6650217	-1	12.5	11	intron (1)	5956.45	-0.228987	0.111758	-2.04896	0.0404662	0.126891	4226.84	-0.0833237	0.13419	-0.620937	0.534641	0.79859
ENSG00000007923	1:6650318:6650318:-1	1	6650318	-1	12.7273	11	intron (1)	5956.45	-0.228987	0.111758	-2.04896	0.0404662	0.126891	4226.84	-0.0833237	0.13419	-0.620937	0.534641	0.79859
ENSG00000007923	1:6650321:6650321:-1	1	6650321	-1	10.4167	11	intron (1)	5956.45	-0.228987	0.111758	-2.04896	0.0404662	0.126891	4226.84	-0.0833237	0.13419	-0.620937	0.534641	0.79859
ENSG00000007923	1:6650514:6650514:-1	1	6650514	-1	28.5714	11	intron (1)	5956.45	-0.228987	0.111758	-2.04896	0.0404662	0.126891	4226.84	-0.0833237	0.13419	-0.620937	0.534641	0.79859
ENSG00000007923	1:6650525:6650525:-1	1	6650525	-1	57.5	11	intron (1)	5956.45	-0.228987	0.111758	-2.04896	0.0404662	0.126891	4226.84	-0.0833237	0.13419	-0.620937	0.534641	0.79859
ENSG00000007923	1:6650535:6650535:-1	1	6650535	-1	33.3333	11	intron (1)	5956.45	-0.228987	0.111758	-2.04896	0.0404662	0.126891	4226.84	-0.0833237	0.13419	-0.620937	0.534641	0.79859
ENSG00000007923	1:6650790:6650790:-1	1	6650790	-1	34.7826	11	intron (1)	5956.45	-0.228987	0.111758	-2.04896	0.0404662	0.126891	4226.84	-0.0833237	0.13419	-0.620937	0.534641	0.79859
ENSG00000007923	1:6650811:6650811:-1	1	6650811	-1	20	11	intron (1)	5956.45	-0.228987	0.111758	-2.04896	0.0404662	0.126891	4226.84	-0.0833237	0.13419	-0.620937	0.534641	0.79859
ENSG00000142864	1:67409006:67409006:-1	1	67409006	-1	52.381	8	3'UTR (1), downstream (3)	20442.5	-0.232937	0.10475	-2.22374	0.0261659	0.0919033	13426.1	-0.492994	0.204915	-2.40585	0.0161349	0.143456
ENSG00000142864	1:67409013:67409013:-1	1	67409013	-1	17.4603	8	3'UTR (1), downstream (3)	20442.5	-0.232937	0.10475	-2.22374	0.0261659	0.0919033	13426.1	-0.492994	0.204915	-2.40585	0.0161349	0.143456
ENSG00000142864	1:67409014:67409014:-1	1	67409014	-1	25	8	3'UTR (1), downstream (3)	20442.5	-0.232937	0.10475	-2.22374	0.0261659	0.0919033	13426.1	-0.492994	0.204915	-2.40585	0.0161349	0.143456
ENSG00000142864	1:67409048:67409048:-1	1	67409048	-1	36.7347	8	3'UTR (1), downstream (3)	20442.5	-0.232937	0.10475	-2.22374	0.0261659	0.0919033	13426.1	-0.492994	0.204915	-2.40585	0.0161349	0.143456
ENSG00000142864	1:67409166:67409166:-1	1	67409166	-1	11.3402	8	3'UTR (1), downstream (3)	20442.5	-0.232937	0.10475	-2.22374	0.0261659	0.0919033	13426.1	-0.492994	0.204915	-2.40585	0.0161349	0.143456
ENSG00000142864	1:67409176:67409176:-1	1	67409176	-1	30.4878	8	3'UTR (1), downstream (3)	20442.5	-0.232937	0.10475	-2.22374	0.0261659	0.0919033	13426.1	-0.492994	0.204915	-2.40585	0.0161349	0.143456
ENSG00000116761	1:70439797:70439797:1	1	70439797	1	17.5	5	3'UTR (1), downstream (2)	997.515	0.0998692	0.153594	0.650216	0.515553	0.708784	645.247	-0.163585	0.206039	-0.793948	0.427226	0.732639
ENSG00000116761	1:70439832:70439832:1	1	70439832	1	22.5806	5	3'UTR (1), downstream (2)	997.515	0.0998692	0.153594	0.650216	0.515553	0.708784	645.247	-0.163585	0.206039	-0.793948	0.427226	0.732639
ENSG00000116761	1:70439836:70439836:1	1	70439836	1	15.625	5	3'UTR (1), downstream (2)	997.515	0.0998692	0.153594	0.650216	0.515553	0.708784	645.247	-0.163585	0.206039	-0.793948	0.427226	0.732639
intergenic	1:70444971:70444971:1	1	70444971	1	36.8421	NA	0	NA	NA	NA	NA	NA	NA	NA	NA	NA	NA	NA	NA
intergenic	1:72688012:72688012:-1	1	72688012	-1	20	NA	0	NA	NA	NA	NA	NA	NA	NA	NA	NA	NA	NA	NA
intergenic	1:72688017:72688017:-1	1	72688017	-1	33.3333	NA	0	NA	NA	NA	NA	NA	NA	NA	NA	NA	NA	NA	NA
intergenic	1:72688032:72688032:-1	1	72688032	-1	50	NA	0	NA	NA	NA	NA	NA	NA	NA	NA	NA	NA	NA	NA
intergenic	1:72688046:72688046:-1	1	72688046	-1	20.6897	NA	0	NA	NA	NA	NA	NA	NA	NA	NA	NA	NA	NA	NA
intergenic	1:72688048:72688048:-1	1	72688048	-1	14.8148	NA	0	NA	NA	NA	NA	NA	NA	NA	NA	NA	NA	NA	NA
intergenic	1:72688100:72688100:-1	1	72688100	-1	30	NA	0	NA	NA	NA	NA	NA	NA	NA	NA	NA	NA	NA	NA
intergenic	1:72688101:72688101:-1	1	72688101	-1	22.7273	NA	0	NA	NA	NA	NA	NA	NA	NA	NA	NA	NA	NA	NA
ENSG00000162664	1:90032220:90032220:1	1	90032220	1	12.766	4	3'UTR (1), downstream (2)	4901.95	-0.276043	0.122155	-2.25978	0.0238348	0.085766	3226.94	-0.596626	0.175477	-3.40003	0.000673783	0.0208433
ENSG00000180758	1:9103231:9103231:-1	1	9103231	-1	16	3	3'UTR (1)	663.262	0.358183	0.141852	2.52504	0.0115685	0.0492736	645.495	-0.0547572	0.214432	-0.255359	0.798446	0.928355
ENSG00000137948	1:91957864:91957864:1	1	91957864	1	41.1765	21	intron (5)	5239.76	-0.33106	0.122379	-2.70519	0.00682646	0.0323882	3229.68	-0.191691	0.13786	-1.39047	0.164386	0.488026
ENSG00000137948	1:91957868:91957868:1	1	91957868	1	62.5	21	intron (5)	5239.76	-0.33106	0.122379	-2.70519	0.00682646	0.0323882	3229.68	-0.191691	0.13786	-1.39047	0.164386	0.488026
intergenic	1:92015193:92015193:1	1	92015193	1	5.95238	NA	0	NA	NA	NA	NA	NA	NA	NA	NA	NA	NA	NA	NA
intergenic	1:92015839:92015839:1	1	92015839	1	13.9535	NA	0	NA	NA	NA	NA	NA	NA	NA	NA	NA	NA	NA	NA
intergenic	1:92015897:92015897:1	1	92015897	1	8.92857	NA	0	NA	NA	NA	NA	NA	NA	NA	NA	NA	NA	NA	NA
intergenic	1:92015902:92015902:1	1	92015902	1	9.09091	NA	0	NA	NA	NA	NA	NA	NA	NA	NA	NA	NA	NA	NA
intergenic	1:92015974:92015974:1	1	92015974	1	13.5135	NA	0	NA	NA	NA	NA	NA	NA	NA	NA	NA	NA	NA	NA
intergenic	1:92015978:92015978:1	1	92015978	1	14.2857	NA	0	NA	NA	NA	NA	NA	NA	NA	NA	NA	NA	NA	NA
intergenic	1:92019071:92019071:1	1	92019071	1	37.7358	NA	0	NA	NA	NA	NA	NA	NA	NA	NA	NA	NA	NA	NA
intergenic	1:92019841:92019841:1	1	92019841	1	9.45946	NA	0	NA	NA	NA	NA	NA	NA	NA	NA	NA	NA	NA	NA
ENSG00000122484	1:92397322:92397322:1	1	92397322	1	30	3	3'UTR (1)	2039.77	-0.318747	0.144157	-2.21111	0.0270285	0.0940357	1103.9	-0.678104	0.21173	-3.20268	0.00136154	0.0328742
ENSG00000122484	1:92397331:92397331:1	1	92397331	1	37.931	3	3'UTR (1)	2039.77	-0.318747	0.144157	-2.21111	0.0270285	0.0940357	1103.9	-0.678104	0.21173	-3.20268	0.00136154	0.0328742
ENSG00000122484	1:92398034:92398034:1	1	92398034	1	46.6667	3	3'UTR (1)	2039.77	-0.318747	0.144157	-2.21111	0.0270285	0.0940357	1103.9	-0.678104	0.21173	-3.20268	0.00136154	0.0328742
ENSG00000122484	1:92398036:92398036:1	1	92398036	1	43.75	3	3'UTR (1)	2039.77	-0.318747	0.144157	-2.21111	0.0270285	0.0940357	1103.9	-0.678104	0.21173	-3.20268	0.00136154	0.0328742
ENSG00000049239	1:9266895:9266895:1	1	9266895	1	6.66667	3	3'UTR (2)	4871.82	0.365028	0.112849	3.23465	0.00121793	0.00783757	2521.74	-0.191319	0.240817	-0.794457	0.426929	0.732639
ENSG00000049239	1:9266898:9266898:1	1	9266898	1	19.2308	3	3'UTR (2)	4871.82	0.365028	0.112849	3.23465	0.00121793	0.00783757	2521.74	-0.191319	0.240817	-0.794457	0.426929	0.732639
ENSG00000049239	1:9266901:9266901:1	1	9266901	1	7.05882	3	3'UTR (2)	4871.82	0.365028	0.112849	3.23465	0.00121793	0.00783757	2521.74	-0.191319	0.240817	-0.794457	0.426929	0.732639
ENSG00000049239	1:9268043:9268043:1	1	9268043	1	20.6897	3	3'UTR (1), downstream (1)	4871.82	0.365028	0.112849	3.23465	0.00121793	0.00783757	2521.74	-0.191319	0.240817	-0.794457	0.426929	0.732639
ENSG00000049239	1:9268061:9268061:1	1	9268061	1	20	3	3'UTR (1), downstream (1)	4871.82	0.365028	0.112849	3.23465	0.00121793	0.00783757	2521.74	-0.191319	0.240817	-0.794457	0.426929	0.732639
ENSG00000049239	1:9268183:9268183:1	1	9268183	1	59.2593	3	3'UTR (1), downstream (1)	4871.82	0.365028	0.112849	3.23465	0.00121793	0.00783757	2521.74	-0.191319	0.240817	-0.794457	0.426929	0.732639
ENSG00000049239	1:9271035:9271035:1	1	9271035	1	13.1148	3	3'UTR (1), downstream (1)	4871.82	0.365028	0.112849	3.23465	0.00121793	0.00783757	2521.74	-0.191319	0.240817	-0.794457	0.426929	0.732639
ENSG00000049239	1:9271042:9271042:1	1	9271042	1	23.5294	3	3'UTR (1), downstream (1)	4871.82	0.365028	0.112849	3.23465	0.00121793	0.00783757	2521.74	-0.191319	0.240817	-0.794457	0.426929	0.732639
ENSG00000122406	1:92839897:92839897:1	1	92839897	1	8.47458	12	intron (1)	54193.3	0.10274	0.122684	0.837439	0.402346	0.615353	99564.7	0.25409	0.17393	1.46088	0.144049	0.461554
ENSG00000223745	1:93334856:93334856:-1	1	93334856	-1	20.8333	24	intron (1)	1112.43	0.144732	0.130584	1.10835	0.267711	0.478892	357.241	0.49814	0.313162	1.59068	0.111681	0.406715
ENSG00000223745	1:93337979:93337979:-1	1	93337979	-1	19.0476	24	exon (1)	1112.43	0.144732	0.130584	1.10835	0.267711	0.478892	357.241	0.49814	0.313162	1.59068	0.111681	0.406715
ENSG00000171612	1:9582969:9582969:1	1	9582969	1	17.2414	1	3'UTR (1)	1998.35	0.0942865	0.122058	0.772471	0.439836	0.647509	3938.65	0.0796394	0.163779	0.486261	0.626782	0.84983
ENSG00000171612	1:9582970:9582970:1	1	9582970	1	16.6667	1	3'UTR (1)	1998.35	0.0942865	0.122058	0.772471	0.439836	0.647509	3938.65	0.0796394	0.163779	0.486261	0.626782	0.84983
ENSG00000171612	1:9582996:9582996:1	1	9582996	1	13.7931	1	3'UTR (1)	1998.35	0.0942865	0.122058	0.772471	0.439836	0.647509	3938.65	0.0796394	0.163779	0.486261	0.626782	0.84983
ENSG00000171612	1:9583048:9583048:1	1	9583048	1	16.6667	1	3'UTR (1)	1998.35	0.0942865	0.122058	0.772471	0.439836	0.647509	3938.65	0.0796394	0.163779	0.486261	0.626782	0.84983
ENSG00000171612	1:9583063:9583063:1	1	9583063	1	13.5135	1	3'UTR (1)	1998.35	0.0942865	0.122058	0.772471	0.439836	0.647509	3938.65	0.0796394	0.163779	0.486261	0.626782	0.84983
ENSG00000171612	1:9583096:9583096:1	1	9583096	1	40.7407	1	3'UTR (1)	1998.35	0.0942865	0.122058	0.772471	0.439836	0.647509	3938.65	0.0796394	0.163779	0.486261	0.626782	0.84983
ENSG00000171612	1:9583137:9583137:1	1	9583137	1	15.7895	1	3'UTR (1)	1998.35	0.0942865	0.122058	0.772471	0.439836	0.647509	3938.65	0.0796394	0.163779	0.486261	0.626782	0.84983
ENSG00000171612	1:9584461:9584461:1	1	9584461	1	22.7273	1	3'UTR (1)	1998.35	0.0942865	0.122058	0.772471	0.439836	0.647509	3938.65	0.0796394	0.163779	0.486261	0.626782	0.84983
ENSG00000171612	1:9584464:9584464:1	1	9584464	1	52.1739	1	3'UTR (1)	1998.35	0.0942865	0.122058	0.772471	0.439836	0.647509	3938.65	0.0796394	0.163779	0.486261	0.626782	0.84983
ENSG00000171612	1:9584477:9584477:1	1	9584477	1	62.069	1	3'UTR (1)	1998.35	0.0942865	0.122058	0.772471	0.439836	0.647509	3938.65	0.0796394	0.163779	0.486261	0.626782	0.84983
ENSG00000171612	1:9584500:9584500:1	1	9584500	1	35.7143	1	3'UTR (1)	1998.35	0.0942865	0.122058	0.772471	0.439836	0.647509	3938.65	0.0796394	0.163779	0.486261	0.626782	0.84983
ENSG00000171612	1:9584504:9584504:1	1	9584504	1	22.2222	1	3'UTR (1)	1998.35	0.0942865	0.122058	0.772471	0.439836	0.647509	3938.65	0.0796394	0.163779	0.486261	0.626782	0.84983
ENSG00000162441	1:9927378:9927378:-1	1	9927378	-1	7.52688	5	downstream (2), intron (1)	2886.22	0.12719	0.121709	1.04504	0.296006	0.510245	3095.05	-0.0689082	0.186241	-0.369995	0.711386	0.891531
ENSG00000162441	1:9927412:9927412:-1	1	9927412	-1	9.90099	5	downstream (2), intron (1)	2886.22	0.12719	0.121709	1.04504	0.296006	0.510245	3095.05	-0.0689082	0.186241	-0.369995	0.711386	0.891531
ENSG00000162441	1:9927422:9927422:-1	1	9927422	-1	9.09091	5	downstream (2), intron (1)	2886.22	0.12719	0.121709	1.04504	0.296006	0.510245	3095.05	-0.0689082	0.186241	-0.369995	0.711386	0.891531
ENSG00000162441	1:9927426:9927426:-1	1	9927426	-1	23.8095	5	downstream (2), intron (1)	2886.22	0.12719	0.121709	1.04504	0.296006	0.510245	3095.05	-0.0689082	0.186241	-0.369995	0.711386	0.891531
ENSG00000162441	1:9927466:9927466:-1	1	9927466	-1	8.69565	5	downstream (2), intron (1)	2886.22	0.12719	0.121709	1.04504	0.296006	0.510245	3095.05	-0.0689082	0.186241	-0.369995	0.711386	0.891531
ENSG00000162441	1:9927789:9927789:-1	1	9927789	-1	31.5789	5	downstream (2), intron (1)	2886.22	0.12719	0.121709	1.04504	0.296006	0.510245	3095.05	-0.0689082	0.186241	-0.369995	0.711386	0.891531
ENSG00000162441	1:9927790:9927790:-1	1	9927790	-1	15.1515	5	downstream (2), intron (1)	2886.22	0.12719	0.121709	1.04504	0.296006	0.510245	3095.05	-0.0689082	0.186241	-0.369995	0.711386	0.891531
ENSG00000162441	1:9927792:9927792:-1	1	9927792	-1	14.7059	5	downstream (2), intron (1)	2886.22	0.12719	0.121709	1.04504	0.296006	0.510245	3095.05	-0.0689082	0.186241	-0.369995	0.711386	0.891531
ENSG00000162441	1:9927795:9927795:-1	1	9927795	-1	55	5	downstream (2), intron (1)	2886.22	0.12719	0.121709	1.04504	0.296006	0.510245	3095.05	-0.0689082	0.186241	-0.369995	0.711386	0.891531
ENSG00000162441	1:9927799:9927799:-1	1	9927799	-1	31.5789	5	downstream (2), intron (1)	2886.22	0.12719	0.121709	1.04504	0.296006	0.510245	3095.05	-0.0689082	0.186241	-0.369995	0.711386	0.891531
ENSG00000162441	1:9927832:9927832:-1	1	9927832	-1	9.67742	5	downstream (2), intron (1)	2886.22	0.12719	0.121709	1.04504	0.296006	0.510245	3095.05	-0.0689082	0.186241	-0.369995	0.711386	0.891531
ENSG00000162441	1:9927878:9927878:-1	1	9927878	-1	5.55556	5	downstream (2), intron (1)	2886.22	0.12719	0.121709	1.04504	0.296006	0.510245	3095.05	-0.0689082	0.186241	-0.369995	0.711386	0.891531
ENSG00000162441	1:9927893:9927893:-1	1	9927893	-1	16	5	downstream (2), intron (1)	2886.22	0.12719	0.121709	1.04504	0.296006	0.510245	3095.05	-0.0689082	0.186241	-0.369995	0.711386	0.891531
ENSG00000162441	1:9927894:9927894:-1	1	9927894	-1	30.3922	5	downstream (2), intron (1)	2886.22	0.12719	0.121709	1.04504	0.296006	0.510245	3095.05	-0.0689082	0.186241	-0.369995	0.711386	0.891531
ENSG00000162441	1:9927902:9927902:-1	1	9927902	-1	13.0841	5	downstream (2), intron (1)	2886.22	0.12719	0.121709	1.04504	0.296006	0.510245	3095.05	-0.0689082	0.186241	-0.369995	0.711386	0.891531
ENSG00000162441	1:9927907:9927907:-1	1	9927907	-1	18.0952	5	downstream (2), intron (1)	2886.22	0.12719	0.121709	1.04504	0.296006	0.510245	3095.05	-0.0689082	0.186241	-0.369995	0.711386	0.891531
ENSG00000162441	1:9927932:9927932:-1	1	9927932	-1	11	5	downstream (2), intron (1)	2886.22	0.12719	0.121709	1.04504	0.296006	0.510245	3095.05	-0.0689082	0.186241	-0.369995	0.711386	0.891531
ENSG00000162441	1:9927952:9927952:-1	1	9927952	-1	11.4583	5	downstream (2), intron (1)	2886.22	0.12719	0.121709	1.04504	0.296006	0.510245	3095.05	-0.0689082	0.186241	-0.369995	0.711386	0.891531
ENSG00000162441	1:9928049:9928049:-1	1	9928049	-1	12.766	5	downstream (2), intron (1)	2886.22	0.12719	0.121709	1.04504	0.296006	0.510245	3095.05	-0.0689082	0.186241	-0.369995	0.711386	0.891531
ENSG00000162441	1:9928089:9928089:-1	1	9928089	-1	25	5	downstream (2), intron (1)	2886.22	0.12719	0.121709	1.04504	0.296006	0.510245	3095.05	-0.0689082	0.186241	-0.369995	0.711386	0.891531
ENSG00000162441	1:9928110:9928110:-1	1	9928110	-1	27.7778	5	downstream (2), intron (1)	2886.22	0.12719	0.121709	1.04504	0.296006	0.510245	3095.05	-0.0689082	0.186241	-0.369995	0.711386	0.891531
ENSG00000162441	1:9928132:9928132:-1	1	9928132	-1	18.1818	5	downstream (2), intron (1)	2886.22	0.12719	0.121709	1.04504	0.296006	0.510245	3095.05	-0.0689082	0.186241	-0.369995	0.711386	0.891531
ENSG00000162441	1:9928190:9928190:-1	1	9928190	-1	38.4615	5	downstream (2), intron (1)	2886.22	0.12719	0.121709	1.04504	0.296006	0.510245	3095.05	-0.0689082	0.186241	-0.369995	0.711386	0.891531
ENSG00000162441	1:9928191:9928191:-1	1	9928191	-1	28.9474	5	downstream (2), intron (1)	2886.22	0.12719	0.121709	1.04504	0.296006	0.510245	3095.05	-0.0689082	0.186241	-0.369995	0.711386	0.891531
ENSG00000162441	1:9928201:9928201:-1	1	9928201	-1	35	5	downstream (2), intron (1)	2886.22	0.12719	0.121709	1.04504	0.296006	0.510245	3095.05	-0.0689082	0.186241	-0.369995	0.711386	0.891531
ENSG00000162441	1:9928230:9928230:-1	1	9928230	-1	41.3793	5	downstream (2), intron (1)	2886.22	0.12719	0.121709	1.04504	0.296006	0.510245	3095.05	-0.0689082	0.186241	-0.369995	0.711386	0.891531
ENSG00000162441	1:9928231:9928231:-1	1	9928231	-1	30.7692	5	downstream (2), intron (1)	2886.22	0.12719	0.121709	1.04504	0.296006	0.510245	3095.05	-0.0689082	0.186241	-0.369995	0.711386	0.891531
ENSG00000162441	1:9928274:9928274:-1	1	9928274	-1	20.7547	5	downstream (2), intron (1)	2886.22	0.12719	0.121709	1.04504	0.296006	0.510245	3095.05	-0.0689082	0.186241	-0.369995	0.711386	0.891531
ENSG00000162441	1:9928632:9928632:-1	1	9928632	-1	8.23529	5	downstream (2), intron (1)	2886.22	0.12719	0.121709	1.04504	0.296006	0.510245	3095.05	-0.0689082	0.186241	-0.369995	0.711386	0.891531
ENSG00000162441	1:9928633:9928633:-1	1	9928633	-1	22.2222	5	downstream (2), intron (1)	2886.22	0.12719	0.121709	1.04504	0.296006	0.510245	3095.05	-0.0689082	0.186241	-0.369995	0.711386	0.891531
ENSG00000162441	1:9928634:9928634:-1	1	9928634	-1	12.7907	5	downstream (2), intron (1)	2886.22	0.12719	0.121709	1.04504	0.296006	0.510245	3095.05	-0.0689082	0.186241	-0.369995	0.711386	0.891531
ENSG00000162441	1:9928708:9928708:-1	1	9928708	-1	8.57143	5	downstream (2), intron (1)	2886.22	0.12719	0.121709	1.04504	0.296006	0.510245	3095.05	-0.0689082	0.186241	-0.369995	0.711386	0.891531
ENSG00000162441	1:9928751:9928751:-1	1	9928751	-1	23.6559	5	downstream (2), intron (1)	2886.22	0.12719	0.121709	1.04504	0.296006	0.510245	3095.05	-0.0689082	0.186241	-0.369995	0.711386	0.891531
ENSG00000162441	1:9928768:9928768:-1	1	9928768	-1	9.85915	5	downstream (2), intron (1)	2886.22	0.12719	0.121709	1.04504	0.296006	0.510245	3095.05	-0.0689082	0.186241	-0.369995	0.711386	0.891531
ENSG00000162441	1:9928776:9928776:-1	1	9928776	-1	13.9241	5	downstream (2), intron (1)	2886.22	0.12719	0.121709	1.04504	0.296006	0.510245	3095.05	-0.0689082	0.186241	-0.369995	0.711386	0.891531
ENSG00000162441	1:9928791:9928791:-1	1	9928791	-1	9.72222	5	downstream (2), intron (1)	2886.22	0.12719	0.121709	1.04504	0.296006	0.510245	3095.05	-0.0689082	0.186241	-0.369995	0.711386	0.891531
ENSG00000162441	1:9928793:9928793:-1	1	9928793	-1	16.6667	5	downstream (2), intron (1)	2886.22	0.12719	0.121709	1.04504	0.296006	0.510245	3095.05	-0.0689082	0.186241	-0.369995	0.711386	0.891531
ENSG00000173614	1:9982879:9982879:1	1	9982879	1	20.4545	5	3'UTR (1), downstream (1)	1179.5	0.127361	0.131714	0.966951	0.333568	0.54856	984.799	-0.221417	0.221793	-0.998303	0.318132	0.6471
ENSG00000173614	1:9982929:9982929:1	1	9982929	1	11.1111	5	3'UTR (1), downstream (1)	1179.5	0.127361	0.131714	0.966951	0.333568	0.54856	984.799	-0.221417	0.221793	-0.998303	0.318132	0.6471
ENSG00000173614	1:9983300:9983300:1	1	9983300	1	22.2222	5	3'UTR (1), downstream (1)	1179.5	0.127361	0.131714	0.966951	0.333568	0.54856	984.799	-0.221417	0.221793	-0.998303	0.318132	0.6471
ENSG00000173614	1:9983435:9983435:1	1	9983435	1	9.67742	5	3'UTR (1), downstream (1)	1179.5	0.127361	0.131714	0.966951	0.333568	0.54856	984.799	-0.221417	0.221793	-0.998303	0.318132	0.6471
ENSG00000173614	1:9983446:9983446:1	1	9983446	1	24.0741	5	3'UTR (1), downstream (1)	1179.5	0.127361	0.131714	0.966951	0.333568	0.54856	984.799	-0.221417	0.221793	-0.998303	0.318132	0.6471
ENSG00000173614	1:9983468:9983468:1	1	9983468	1	19.5652	5	3'UTR (1), downstream (1)	1179.5	0.127361	0.131714	0.966951	0.333568	0.54856	984.799	-0.221417	0.221793	-0.998303	0.318132	0.6471
ENSG00000173614	1:9983469:9983469:1	1	9983469	1	26.5306	5	3'UTR (1), downstream (1)	1179.5	0.127361	0.131714	0.966951	0.333568	0.54856	984.799	-0.221417	0.221793	-0.998303	0.318132	0.6471
ENSG00000173614	1:9984309:9984309:1	1	9984309	1	16.129	5	3'UTR (1), downstream (1)	1179.5	0.127361	0.131714	0.966951	0.333568	0.54856	984.799	-0.221417	0.221793	-0.998303	0.318132	0.6471
ENSG00000173614	1:9984321:9984321:1	1	9984321	1	10.8108	5	3'UTR (1), downstream (1)	1179.5	0.127361	0.131714	0.966951	0.333568	0.54856	984.799	-0.221417	0.221793	-0.998303	0.318132	0.6471
ENSG00000095485	10:100232541:100232541:-1	10	100232541	-1	7.57576	8	downstream (1)	2158.85	0.0174669	0.109566	0.159419	0.873338	0.939246	1657.94	-0.127164	0.204138	-0.622928	0.533332	0.798123
ENSG00000095485	10:100232545:100232545:-1	10	100232545	-1	8.33333	8	downstream (1)	2158.85	0.0174669	0.109566	0.159419	0.873338	0.939246	1657.94	-0.127164	0.204138	-0.622928	0.533332	0.798123
ENSG00000095485	10:100232550:100232550:-1	10	100232550	-1	70.1299	8	downstream (1)	2158.85	0.0174669	0.109566	0.159419	0.873338	0.939246	1657.94	-0.127164	0.204138	-0.622928	0.533332	0.798123
ENSG00000095485	10:100232551:100232551:-1	10	100232551	-1	97.3684	8	downstream (1)	2158.85	0.0174669	0.109566	0.159419	0.873338	0.939246	1657.94	-0.127164	0.204138	-0.622928	0.533332	0.798123
ENSG00000095485	10:100232557:100232557:-1	10	100232557	-1	42.5	8	downstream (1)	2158.85	0.0174669	0.109566	0.159419	0.873338	0.939246	1657.94	-0.127164	0.204138	-0.622928	0.533332	0.798123
ENSG00000095485	10:100232668:100232668:-1	10	100232668	-1	13.75	8	downstream (1)	2158.85	0.0174669	0.109566	0.159419	0.873338	0.939246	1657.94	-0.127164	0.204138	-0.622928	0.533332	0.798123
ENSG00000095485	10:100233026:100233026:-1	10	100233026	-1	22.619	8	downstream (1)	2158.85	0.0174669	0.109566	0.159419	0.873338	0.939246	1657.94	-0.127164	0.204138	-0.622928	0.533332	0.798123
ENSG00000095485	10:100233036:100233036:-1	10	100233036	-1	21.8391	8	downstream (1)	2158.85	0.0174669	0.109566	0.159419	0.873338	0.939246	1657.94	-0.127164	0.204138	-0.622928	0.533332	0.798123
ENSG00000095485	10:100233141:100233141:-1	10	100233141	-1	16.3636	8	3'UTR (1)	2158.85	0.0174669	0.109566	0.159419	0.873338	0.939246	1657.94	-0.127164	0.204138	-0.622928	0.533332	0.798123
ENSG00000099194	10:100358139:100358139:1	10	100358139	1	11.1111	1	intron (1)	213197	0.492513	0.115086	4.27951	1.87308e-05	0.000217238	112082	-0.498385	0.182979	-2.72373	0.00645496	0.0822982
ENSG00000099194	10:100361844:100361844:1	10	100361844	1	3.59281	1	3'UTR (1)	213197	0.492513	0.115086	4.27951	1.87308e-05	0.000217238	112082	-0.498385	0.182979	-2.72373	0.00645496	0.0822982
ENSG00000235823	10:100377831:100377831:1	10	100377831	1	28.5714	6	intron (1)	1779.44	0.349273	0.147084	2.37465	0.0175657	0.0679055	3483.65	0.188314	0.238483	0.789635	0.429741	0.733954
ENSG00000166135	10:100558391:100558391:1	10	100558391	1	16.129	5	3'UTR (1)	7284.53	0.0958018	0.110026	0.870717	0.383909	0.597572	5865.27	0.0248278	0.257829	0.0962957	0.923286	0.970569
ENSG00000166135	10:100558419:100558419:1	10	100558419	1	16.6667	5	3'UTR (1)	7284.53	0.0958018	0.110026	0.870717	0.383909	0.597572	5865.27	0.0248278	0.257829	0.0962957	0.923286	0.970569
ENSG00000198408	10:101789938:101789938:-1	10	101789938	-1	18.5185	11	intron (2)	7127.66	0.378948	0.100834	3.75812	0.000171195	0.00147752	3173.77	-0.217505	0.265557	-0.819053	0.412756	0.72274
ENSG00000214435	10:102900826:102900826:1	10	102900826	1	67.8571	2	3'UTR (1)	NA	NA	NA	NA	NA	NA	NA	NA	NA	NA	NA	NA
ENSG00000270316	10:102900826:102900826:1	10	102900826	1	67.8571	1	3'UTR (1)	NA	NA	NA	NA	NA	NA	NA	NA	NA	NA	NA	NA
ENSG00000214435	10:102900828:102900828:1	10	102900828	1	53.8462	2	3'UTR (1)	NA	NA	NA	NA	NA	NA	NA	NA	NA	NA	NA	NA
ENSG00000270316	10:102900828:102900828:1	10	102900828	1	53.8462	1	3'UTR (1)	NA	NA	NA	NA	NA	NA	NA	NA	NA	NA	NA	NA
ENSG00000214435	10:102900829:102900829:1	10	102900829	1	25.9259	2	3'UTR (1)	NA	NA	NA	NA	NA	NA	NA	NA	NA	NA	NA	NA
ENSG00000270316	10:102900829:102900829:1	10	102900829	1	25.9259	1	3'UTR (1)	NA	NA	NA	NA	NA	NA	NA	NA	NA	NA	NA	NA
ENSG00000214435	10:102900940:102900940:1	10	102900940	1	10.8108	2	3'UTR (1)	NA	NA	NA	NA	NA	NA	NA	NA	NA	NA	NA	NA
ENSG00000270316	10:102900940:102900940:1	10	102900940	1	10.8108	1	3'UTR (1)	NA	NA	NA	NA	NA	NA	NA	NA	NA	NA	NA	NA
ENSG00000214435	10:102900976:102900976:1	10	102900976	1	11.2903	2	3'UTR (1)	NA	NA	NA	NA	NA	NA	NA	NA	NA	NA	NA	NA
ENSG00000270316	10:102900976:102900976:1	10	102900976	1	11.2903	1	3'UTR (1)	NA	NA	NA	NA	NA	NA	NA	NA	NA	NA	NA	NA
ENSG00000214435	10:102900999:102900999:1	10	102900999	1	17.4603	2	3'UTR (1)	NA	NA	NA	NA	NA	NA	NA	NA	NA	NA	NA	NA
ENSG00000270316	10:102900999:102900999:1	10	102900999	1	17.4603	1	3'UTR (1)	NA	NA	NA	NA	NA	NA	NA	NA	NA	NA	NA	NA
ENSG00000214435	10:102901008:102901008:1	10	102901008	1	19.6721	2	3'UTR (1)	NA	NA	NA	NA	NA	NA	NA	NA	NA	NA	NA	NA
ENSG00000270316	10:102901008:102901008:1	10	102901008	1	19.6721	1	3'UTR (1)	NA	NA	NA	NA	NA	NA	NA	NA	NA	NA	NA	NA
ENSG00000214435	10:102901016:102901016:1	10	102901016	1	11.1111	2	3'UTR (1)	NA	NA	NA	NA	NA	NA	NA	NA	NA	NA	NA	NA
ENSG00000270316	10:102901016:102901016:1	10	102901016	1	11.1111	1	3'UTR (1)	NA	NA	NA	NA	NA	NA	NA	NA	NA	NA	NA	NA
ENSG00000214435	10:102901274:102901274:1	10	102901274	1	45.3333	2	3'UTR (1)	NA	NA	NA	NA	NA	NA	NA	NA	NA	NA	NA	NA
ENSG00000270316	10:102901274:102901274:1	10	102901274	1	45.3333	1	3'UTR (1)	NA	NA	NA	NA	NA	NA	NA	NA	NA	NA	NA	NA
ENSG00000214435	10:102901311:102901311:1	10	102901311	1	9.23077	2	3'UTR (1)	NA	NA	NA	NA	NA	NA	NA	NA	NA	NA	NA	NA
ENSG00000270316	10:102901311:102901311:1	10	102901311	1	9.23077	1	3'UTR (1)	NA	NA	NA	NA	NA	NA	NA	NA	NA	NA	NA	NA
ENSG00000214435	10:102901323:102901323:1	10	102901323	1	9.33333	2	3'UTR (1)	NA	NA	NA	NA	NA	NA	NA	NA	NA	NA	NA	NA
ENSG00000270316	10:102901323:102901323:1	10	102901323	1	9.33333	1	3'UTR (1)	NA	NA	NA	NA	NA	NA	NA	NA	NA	NA	NA	NA
ENSG00000214435	10:102901369:102901369:1	10	102901369	1	24.4444	2	3'UTR (1)	NA	NA	NA	NA	NA	NA	NA	NA	NA	NA	NA	NA
ENSG00000270316	10:102901369:102901369:1	10	102901369	1	24.4444	1	3'UTR (1)	NA	NA	NA	NA	NA	NA	NA	NA	NA	NA	NA	NA
ENSG00000214435	10:102901378:102901378:1	10	102901378	1	60.4651	2	3'UTR (1)	NA	NA	NA	NA	NA	NA	NA	NA	NA	NA	NA	NA
ENSG00000270316	10:102901378:102901378:1	10	102901378	1	60.4651	1	3'UTR (1)	NA	NA	NA	NA	NA	NA	NA	NA	NA	NA	NA	NA
ENSG00000214435	10:102901467:102901467:1	10	102901467	1	40.9091	2	3'UTR (1)	NA	NA	NA	NA	NA	NA	NA	NA	NA	NA	NA	NA
ENSG00000270316	10:102901467:102901467:1	10	102901467	1	40.9091	1	3'UTR (1)	NA	NA	NA	NA	NA	NA	NA	NA	NA	NA	NA	NA
ENSG00000214435	10:102901470:102901470:1	10	102901470	1	33.3333	2	3'UTR (1)	NA	NA	NA	NA	NA	NA	NA	NA	NA	NA	NA	NA
ENSG00000270316	10:102901470:102901470:1	10	102901470	1	33.3333	1	3'UTR (1)	NA	NA	NA	NA	NA	NA	NA	NA	NA	NA	NA	NA
ENSG00000148843	10:103426594:103426594:1	10	103426594	1	60	7	intron (1)	8895.24	-0.0831721	0.113879	-0.730355	0.465174	0.66813	2324.14	-0.538767	0.250444	-2.15125	0.0314563	0.209639
ENSG00000151532	10:112449595:112449595:1	10	112449595	1	15.3846	9	exon (2), intron (1)	1486.82	0.267031	0.120119	2.22306	0.0262116	0.0920315	1421.77	0.170001	0.196924	0.863281	0.387983	0.704823
ENSG00000151532	10:112449632:112449632:1	10	112449632	1	45	9	exon (2), intron (1)	1486.82	0.267031	0.120119	2.22306	0.0262116	0.0920315	1421.77	0.170001	0.196924	0.863281	0.387983	0.704823
ENSG00000151532	10:112449646:112449646:1	10	112449646	1	21.7391	9	exon (2), intron (1)	1486.82	0.267031	0.120119	2.22306	0.0262116	0.0920315	1421.77	0.170001	0.196924	0.863281	0.387983	0.704823
ENSG00000187164	10:116896975:116896975:-1	10	116896975	-1	19.2308	7	downstream (2), intron (3)	9503.69	0.161112	0.116558	1.38224	0.166899	0.351279	3622.94	-0.464866	0.172165	-2.70012	0.00693146	0.0863935
ENSG00000187164	10:116896986:116896986:-1	10	116896986	-1	35.7143	7	downstream (2), intron (3)	9503.69	0.161112	0.116558	1.38224	0.166899	0.351279	3622.94	-0.464866	0.172165	-2.70012	0.00693146	0.0863935
ENSG00000187164	10:116896989:116896989:-1	10	116896989	-1	27.5862	7	downstream (2), intron (3)	9503.69	0.161112	0.116558	1.38224	0.166899	0.351279	3622.94	-0.464866	0.172165	-2.70012	0.00693146	0.0863935
ENSG00000187164	10:116897034:116897034:-1	10	116897034	-1	10	7	downstream (2), intron (3)	9503.69	0.161112	0.116558	1.38224	0.166899	0.351279	3622.94	-0.464866	0.172165	-2.70012	0.00693146	0.0863935
ENSG00000187164	10:116897049:116897049:-1	10	116897049	-1	20	7	downstream (2), intron (3)	9503.69	0.161112	0.116558	1.38224	0.166899	0.351279	3622.94	-0.464866	0.172165	-2.70012	0.00693146	0.0863935
ENSG00000187164	10:116897053:116897053:-1	10	116897053	-1	16.2791	7	downstream (2), intron (3)	9503.69	0.161112	0.116558	1.38224	0.166899	0.351279	3622.94	-0.464866	0.172165	-2.70012	0.00693146	0.0863935
ENSG00000187164	10:116898071:116898071:-1	10	116898071	-1	33.3333	7	downstream (2), intron (3)	9503.69	0.161112	0.116558	1.38224	0.166899	0.351279	3622.94	-0.464866	0.172165	-2.70012	0.00693146	0.0863935
ENSG00000187164	10:116898111:116898111:-1	10	116898111	-1	17.8571	7	downstream (2), intron (3)	9503.69	0.161112	0.116558	1.38224	0.166899	0.351279	3622.94	-0.464866	0.172165	-2.70012	0.00693146	0.0863935
ENSG00000187164	10:116898162:116898162:-1	10	116898162	-1	16.2791	7	downstream (2), intron (3)	9503.69	0.161112	0.116558	1.38224	0.166899	0.351279	3622.94	-0.464866	0.172165	-2.70012	0.00693146	0.0863935
ENSG00000187164	10:116898206:116898206:-1	10	116898206	-1	15.2174	7	downstream (2), intron (3)	9503.69	0.161112	0.116558	1.38224	0.166899	0.351279	3622.94	-0.464866	0.172165	-2.70012	0.00693146	0.0863935
ENSG00000187164	10:116898246:116898246:-1	10	116898246	-1	23.6842	7	downstream (2), intron (3)	9503.69	0.161112	0.116558	1.38224	0.166899	0.351279	3622.94	-0.464866	0.172165	-2.70012	0.00693146	0.0863935
ENSG00000187164	10:116898284:116898284:-1	10	116898284	-1	29.1667	7	downstream (2), intron (3)	9503.69	0.161112	0.116558	1.38224	0.166899	0.351279	3622.94	-0.464866	0.172165	-2.70012	0.00693146	0.0863935
ENSG00000187164	10:116898289:116898289:-1	10	116898289	-1	80	7	downstream (2), intron (3)	9503.69	0.161112	0.116558	1.38224	0.166899	0.351279	3622.94	-0.464866	0.172165	-2.70012	0.00693146	0.0863935
ENSG00000187164	10:116898292:116898292:-1	10	116898292	-1	43.3333	7	downstream (2), intron (3)	9503.69	0.161112	0.116558	1.38224	0.166899	0.351279	3622.94	-0.464866	0.172165	-2.70012	0.00693146	0.0863935
intergenic	10:117268825:117268825:-1	10	117268825	-1	26.9231	NA	0	NA	NA	NA	NA	NA	NA	NA	NA	NA	NA	NA	NA
intergenic	10:117268829:117268829:-1	10	117268829	-1	20.6897	NA	0	NA	NA	NA	NA	NA	NA	NA	NA	NA	NA	NA	NA
ENSG00000119979	10:119105374:119105374:1	10	119105374	1	42.1053	11	5'UTR (1), intron (1)	1108.65	0.460511	0.117375	3.92343	8.72979e-05	0.000842076	2505.63	-0.0340761	0.18956	-0.179764	0.857338	0.946932
ENSG00000119979	10:119105381:119105381:1	10	119105381	1	31.5789	11	5'UTR (1), intron (1)	1108.65	0.460511	0.117375	3.92343	8.72979e-05	0.000842076	2505.63	-0.0340761	0.18956	-0.179764	0.857338	0.946932
ENSG00000151923	10:119572211:119572211:-1	10	119572211	-1	20.4545	13	3'UTR (1), downstream (3)	9616.22	0.371057	0.104537	3.54953	0.000385918	0.00296559	4515.84	0.3478	0.195727	1.77696	0.0755743	0.336413
ENSG00000151923	10:119572252:119572252:-1	10	119572252	-1	13.1579	13	3'UTR (1), downstream (3)	9616.22	0.371057	0.104537	3.54953	0.000385918	0.00296559	4515.84	0.3478	0.195727	1.77696	0.0755743	0.336413
ENSG00000151923	10:119572304:119572304:-1	10	119572304	-1	26.6667	13	3'UTR (1), downstream (3)	9616.22	0.371057	0.104537	3.54953	0.000385918	0.00296559	4515.84	0.3478	0.195727	1.77696	0.0755743	0.336413
ENSG00000151923	10:119572310:119572310:-1	10	119572310	-1	45.7143	13	3'UTR (1), downstream (3)	9616.22	0.371057	0.104537	3.54953	0.000385918	0.00296559	4515.84	0.3478	0.195727	1.77696	0.0755743	0.336413
ENSG00000151923	10:119572344:119572344:-1	10	119572344	-1	10.6383	13	3'UTR (1), downstream (3)	9616.22	0.371057	0.104537	3.54953	0.000385918	0.00296559	4515.84	0.3478	0.195727	1.77696	0.0755743	0.336413
ENSG00000151923	10:119572351:119572351:-1	10	119572351	-1	11.3636	13	3'UTR (1), downstream (3)	9616.22	0.371057	0.104537	3.54953	0.000385918	0.00296559	4515.84	0.3478	0.195727	1.77696	0.0755743	0.336413
ENSG00000151923	10:119572353:119572353:-1	10	119572353	-1	13.6364	13	3'UTR (1), downstream (3)	9616.22	0.371057	0.104537	3.54953	0.000385918	0.00296559	4515.84	0.3478	0.195727	1.77696	0.0755743	0.336413
ENSG00000151923	10:119572354:119572354:-1	10	119572354	-1	32.6087	13	3'UTR (1), downstream (3)	9616.22	0.371057	0.104537	3.54953	0.000385918	0.00296559	4515.84	0.3478	0.195727	1.77696	0.0755743	0.336413
ENSG00000151923	10:119572378:119572378:-1	10	119572378	-1	8.47458	13	3'UTR (1), downstream (3)	9616.22	0.371057	0.104537	3.54953	0.000385918	0.00296559	4515.84	0.3478	0.195727	1.77696	0.0755743	0.336413
ENSG00000151923	10:119572433:119572433:-1	10	119572433	-1	10.4167	13	3'UTR (1), downstream (3)	9616.22	0.371057	0.104537	3.54953	0.000385918	0.00296559	4515.84	0.3478	0.195727	1.77696	0.0755743	0.336413
ENSG00000151923	10:119572451:119572451:-1	10	119572451	-1	21.4286	13	3'UTR (1), downstream (3)	9616.22	0.371057	0.104537	3.54953	0.000385918	0.00296559	4515.84	0.3478	0.195727	1.77696	0.0755743	0.336413
ENSG00000151923	10:119572676:119572676:-1	10	119572676	-1	19.5652	13	3'UTR (1), downstream (3)	9616.22	0.371057	0.104537	3.54953	0.000385918	0.00296559	4515.84	0.3478	0.195727	1.77696	0.0755743	0.336413
ENSG00000151923	10:119572679:119572679:-1	10	119572679	-1	29.7872	13	3'UTR (1), downstream (3)	9616.22	0.371057	0.104537	3.54953	0.000385918	0.00296559	4515.84	0.3478	0.195727	1.77696	0.0755743	0.336413
ENSG00000151923	10:119572681:119572681:-1	10	119572681	-1	17.0213	13	3'UTR (1), downstream (3)	9616.22	0.371057	0.104537	3.54953	0.000385918	0.00296559	4515.84	0.3478	0.195727	1.77696	0.0755743	0.336413
ENSG00000151923	10:119572720:119572720:-1	10	119572720	-1	17.3913	13	3'UTR (1), downstream (3)	9616.22	0.371057	0.104537	3.54953	0.000385918	0.00296559	4515.84	0.3478	0.195727	1.77696	0.0755743	0.336413
ENSG00000151923	10:119572722:119572722:-1	10	119572722	-1	16.6667	13	3'UTR (1), downstream (3)	9616.22	0.371057	0.104537	3.54953	0.000385918	0.00296559	4515.84	0.3478	0.195727	1.77696	0.0755743	0.336413
ENSG00000151923	10:119572723:119572723:-1	10	119572723	-1	21.4286	13	3'UTR (1), downstream (3)	9616.22	0.371057	0.104537	3.54953	0.000385918	0.00296559	4515.84	0.3478	0.195727	1.77696	0.0755743	0.336413
ENSG00000151923	10:119573099:119573099:-1	10	119573099	-1	20.8333	13	3'UTR (1), downstream (3)	9616.22	0.371057	0.104537	3.54953	0.000385918	0.00296559	4515.84	0.3478	0.195727	1.77696	0.0755743	0.336413
ENSG00000151923	10:119573111:119573111:-1	10	119573111	-1	13.3333	13	3'UTR (1), downstream (3)	9616.22	0.371057	0.104537	3.54953	0.000385918	0.00296559	4515.84	0.3478	0.195727	1.77696	0.0755743	0.336413
ENSG00000151923	10:119573189:119573189:-1	10	119573189	-1	21.0526	13	3'UTR (1), downstream (3)	9616.22	0.371057	0.104537	3.54953	0.000385918	0.00296559	4515.84	0.3478	0.195727	1.77696	0.0755743	0.336413
ENSG00000151923	10:119573319:119573319:-1	10	119573319	-1	13.5135	13	3'UTR (1), downstream (3)	9616.22	0.371057	0.104537	3.54953	0.000385918	0.00296559	4515.84	0.3478	0.195727	1.77696	0.0755743	0.336413
ENSG00000151923	10:119573325:119573325:-1	10	119573325	-1	13.5135	13	3'UTR (1), downstream (3)	9616.22	0.371057	0.104537	3.54953	0.000385918	0.00296559	4515.84	0.3478	0.195727	1.77696	0.0755743	0.336413
ENSG00000181192	10:12121034:12121034:1	10	12121034	1	11.6279	6	3'UTR (1)	3174.05	0.00770544	0.129733	0.0593946	0.952638	0.978823	1826.19	-0.511501	0.166901	-3.06471	0.00217883	0.0421596
ENSG00000181192	10:12121574:12121574:1	10	12121574	1	8.95522	6	3'UTR (1)	3174.05	0.00770544	0.129733	0.0593946	0.952638	0.978823	1826.19	-0.511501	0.166901	-3.06471	0.00217883	0.0421596
ENSG00000152457	10:14907007:14907007:-1	10	14907007	-1	16.6667	16	downstream (8), intron (1)	684.249	0.126668	0.140059	0.90439	0.365789	0.579765	912.902	-0.241124	0.186886	-1.29022	0.196974	0.52946
intergenic	10:15419383:15419383:-1	10	15419383	-1	94.1176	NA	0	NA	NA	NA	NA	NA	NA	NA	NA	NA	NA	NA	NA
ENSG00000165983	10:16437438:16437438:1	10	16437438	1	10.8108	5	5'UTR (1), intron (2), upstream (1)	1161.09	0.42491	0.125069	3.3974	0.000680283	0.00480911	821.591	0.00909263	0.18385	0.0494566	0.960555	0.984507
ENSG00000148459	10:26741931:26741931:1	10	26741931	1	42.4242	4	intron (1)	986.889	-0.331428	0.122823	-2.69843	0.00696683	0.0329305	1358.77	0.0720004	0.211776	0.339984	0.733869	0.900415
ENSG00000254635	10:28525686:28525686:-1	10	28525686	-1	76.1905	2	intron (1)	942.666	0.36193	0.133567	2.70972	0.00673397	0.0320209	1230.74	-0.0412569	0.216645	-0.190436	0.848968	0.944056
ENSG00000254635	10:28525689:28525689:-1	10	28525689	-1	16.6667	2	intron (1)	942.666	0.36193	0.133567	2.70972	0.00673397	0.0320209	1230.74	-0.0412569	0.216645	-0.190436	0.848968	0.944056
ENSG00000254635	10:28525726:28525726:-1	10	28525726	-1	56.4103	2	intron (1)	942.666	0.36193	0.133567	2.70972	0.00673397	0.0320209	1230.74	-0.0412569	0.216645	-0.190436	0.848968	0.944056
ENSG00000254635	10:28525729:28525729:-1	10	28525729	-1	23.0769	2	intron (1)	942.666	0.36193	0.133567	2.70972	0.00673397	0.0320209	1230.74	-0.0412569	0.216645	-0.190436	0.848968	0.944056
ENSG00000254635	10:28525763:28525763:-1	10	28525763	-1	60	2	intron (1)	942.666	0.36193	0.133567	2.70972	0.00673397	0.0320209	1230.74	-0.0412569	0.216645	-0.190436	0.848968	0.944056
ENSG00000224597	10:29459195:29459195:1	10	29459195	1	37.037	13	downstream (1), intron (4)	875.273	0.0112321	0.127081	0.0883855	0.92957	0.966787	2074.51	-0.121836	0.26448	-0.460662	0.645041	0.859496
ENSG00000224597	10:29459866:29459866:1	10	29459866	1	14.2857	13	downstream (1), intron (4)	875.273	0.0112321	0.127081	0.0883855	0.92957	0.966787	2074.51	-0.121836	0.26448	-0.460662	0.645041	0.859496
ENSG00000224597	10:29460795:29460795:1	10	29460795	1	25	13	downstream (1), intron (4)	875.273	0.0112321	0.127081	0.0883855	0.92957	0.966787	2074.51	-0.121836	0.26448	-0.460662	0.645041	0.859496
intergenic	10:32895723:32895723:-1	10	32895723	-1	14.7059	NA	0	NA	NA	NA	NA	NA	NA	NA	NA	NA	NA	NA	NA
intergenic	10:32895793:32895793:-1	10	32895793	-1	30.4348	NA	0	NA	NA	NA	NA	NA	NA	NA	NA	NA	NA	NA	NA
intergenic	10:32895874:32895874:-1	10	32895874	-1	30.4348	NA	0	NA	NA	NA	NA	NA	NA	NA	NA	NA	NA	NA	NA
intergenic	10:32895883:32895883:-1	10	32895883	-1	40.9091	NA	0	NA	NA	NA	NA	NA	NA	NA	NA	NA	NA	NA	NA
intergenic	10:32895897:32895897:-1	10	32895897	-1	40.9091	NA	0	NA	NA	NA	NA	NA	NA	NA	NA	NA	NA	NA	NA
intergenic	10:32895921:32895921:-1	10	32895921	-1	25	NA	0	NA	NA	NA	NA	NA	NA	NA	NA	NA	NA	NA	NA
intergenic	10:32895924:32895924:-1	10	32895924	-1	29.0323	NA	0	NA	NA	NA	NA	NA	NA	NA	NA	NA	NA	NA	NA
intergenic	10:32895942:32895942:-1	10	32895942	-1	31.0345	NA	0	NA	NA	NA	NA	NA	NA	NA	NA	NA	NA	NA	NA
intergenic	10:32895944:32895944:-1	10	32895944	-1	18.5185	NA	0	NA	NA	NA	NA	NA	NA	NA	NA	NA	NA	NA	NA
intergenic	10:32895955:32895955:-1	10	32895955	-1	61.9048	NA	0	NA	NA	NA	NA	NA	NA	NA	NA	NA	NA	NA	NA
intergenic	10:32895963:32895963:-1	10	32895963	-1	50	NA	0	NA	NA	NA	NA	NA	NA	NA	NA	NA	NA	NA	NA
intergenic	10:32895964:32895964:-1	10	32895964	-1	38.0952	NA	0	NA	NA	NA	NA	NA	NA	NA	NA	NA	NA	NA	NA
intergenic	10:32895983:32895983:-1	10	32895983	-1	31.0345	NA	0	NA	NA	NA	NA	NA	NA	NA	NA	NA	NA	NA	NA
intergenic	10:32895985:32895985:-1	10	32895985	-1	70.3704	NA	0	NA	NA	NA	NA	NA	NA	NA	NA	NA	NA	NA	NA
intergenic	10:32895986:32895986:-1	10	32895986	-1	57.6923	NA	0	NA	NA	NA	NA	NA	NA	NA	NA	NA	NA	NA	NA
intergenic	10:32897210:32897210:-1	10	32897210	-1	19.0476	NA	0	NA	NA	NA	NA	NA	NA	NA	NA	NA	NA	NA	NA
intergenic	10:32897410:32897410:-1	10	32897410	-1	18.1818	NA	0	NA	NA	NA	NA	NA	NA	NA	NA	NA	NA	NA	NA
intergenic	10:32897418:32897418:-1	10	32897418	-1	19.0476	NA	0	NA	NA	NA	NA	NA	NA	NA	NA	NA	NA	NA	NA
intergenic	10:38066834:38066834:1	10	38066834	1	42.1053	NA	0	NA	NA	NA	NA	NA	NA	NA	NA	NA	NA	NA	NA
ENSG00000148584	10:50882376:50882376:-1	10	50882376	-1	16	10	intron (5), upstream (1)	12431.2	0.180367	0.134372	1.34229	0.179502	0.369134	5232.97	-0.264855	0.227901	-1.16215	0.245176	0.579259
ENSG00000134452	10:5901229:5901229:1	10	5901229	1	50	16	intron (3)	5426.7	0.101086	0.106093	0.952805	0.340689	0.555939	4207.24	0.0536347	0.167512	0.320185	0.748828	0.905992
ENSG00000134452	10:5901762:5901762:1	10	5901762	1	45	16	intron (3)	5426.7	0.101086	0.106093	0.952805	0.340689	0.555939	4207.24	0.0536347	0.167512	0.320185	0.748828	0.905992
ENSG00000134452	10:5901765:5901765:1	10	5901765	1	40	16	intron (3)	5426.7	0.101086	0.106093	0.952805	0.340689	0.555939	4207.24	0.0536347	0.167512	0.320185	0.748828	0.905992
ENSG00000122912	10:68521373:68521373:-1	10	68521373	-1	23.8095	7	intron (1), upstream (1)	961.376	-0.230748	0.140571	-1.6415	0.100693	0.247234	873.615	-0.0106695	0.188756	-0.0565254	0.954923	0.983152
ENSG00000122912	10:68523331:68523331:-1	10	68523331	-1	42.1053	7	intron (1), upstream (1)	961.376	-0.230748	0.140571	-1.6415	0.100693	0.247234	873.615	-0.0106695	0.188756	-0.0565254	0.954923	0.983152
ENSG00000060339	10:68757605:68757605:1	10	68757605	1	24	18	intron (3)	7898.4	-0.156578	0.110966	-1.41104	0.158233	0.339755	4122.81	-0.75707	0.200577	-3.77446	0.000160354	0.00775698
ENSG00000060339	10:68758156:68758156:1	10	68758156	1	10	18	intron (3)	7898.4	-0.156578	0.110966	-1.41104	0.158233	0.339755	4122.81	-0.75707	0.200577	-3.77446	0.000160354	0.00775698
ENSG00000060339	10:68758323:68758323:1	10	68758323	1	68.1818	18	intron (3)	7898.4	-0.156578	0.110966	-1.41104	0.158233	0.339755	4122.81	-0.75707	0.200577	-3.77446	0.000160354	0.00775698
ENSG00000060339	10:68758790:68758790:1	10	68758790	1	25.9259	18	intron (3)	7898.4	-0.156578	0.110966	-1.41104	0.158233	0.339755	4122.81	-0.75707	0.200577	-3.77446	0.000160354	0.00775698
ENSG00000060339	10:68758875:68758875:1	10	68758875	1	44.7368	18	intron (3)	7898.4	-0.156578	0.110966	-1.41104	0.158233	0.339755	4122.81	-0.75707	0.200577	-3.77446	0.000160354	0.00775698
ENSG00000060339	10:68759141:68759141:1	10	68759141	1	33.3333	18	intron (3)	7898.4	-0.156578	0.110966	-1.41104	0.158233	0.339755	4122.81	-0.75707	0.200577	-3.77446	0.000160354	0.00775698
ENSG00000060339	10:68759145:68759145:1	10	68759145	1	16.6667	18	intron (3)	7898.4	-0.156578	0.110966	-1.41104	0.158233	0.339755	4122.81	-0.75707	0.200577	-3.77446	0.000160354	0.00775698
ENSG00000060339	10:68759185:68759185:1	10	68759185	1	11.9048	18	intron (3)	7898.4	-0.156578	0.110966	-1.41104	0.158233	0.339755	4122.81	-0.75707	0.200577	-3.77446	0.000160354	0.00775698
ENSG00000060339	10:68759230:68759230:1	10	68759230	1	11.1111	18	intron (3)	7898.4	-0.156578	0.110966	-1.41104	0.158233	0.339755	4122.81	-0.75707	0.200577	-3.77446	0.000160354	0.00775698
ENSG00000060339	10:68759232:68759232:1	10	68759232	1	55.8824	18	intron (3)	7898.4	-0.156578	0.110966	-1.41104	0.158233	0.339755	4122.81	-0.75707	0.200577	-3.77446	0.000160354	0.00775698
ENSG00000060339	10:68759294:68759294:1	10	68759294	1	36	18	intron (3)	7898.4	-0.156578	0.110966	-1.41104	0.158233	0.339755	4122.81	-0.75707	0.200577	-3.77446	0.000160354	0.00775698
ENSG00000060339	10:68759312:68759312:1	10	68759312	1	48.1481	18	intron (3)	7898.4	-0.156578	0.110966	-1.41104	0.158233	0.339755	4122.81	-0.75707	0.200577	-3.77446	0.000160354	0.00775698
ENSG00000060339	10:68759527:68759527:1	10	68759527	1	11.1111	18	intron (3)	7898.4	-0.156578	0.110966	-1.41104	0.158233	0.339755	4122.81	-0.75707	0.200577	-3.77446	0.000160354	0.00775698
ENSG00000060339	10:68759559:68759559:1	10	68759559	1	14.7059	18	intron (3)	7898.4	-0.156578	0.110966	-1.41104	0.158233	0.339755	4122.81	-0.75707	0.200577	-3.77446	0.000160354	0.00775698
ENSG00000060339	10:68759617:68759617:1	10	68759617	1	20.8333	18	intron (3)	7898.4	-0.156578	0.110966	-1.41104	0.158233	0.339755	4122.81	-0.75707	0.200577	-3.77446	0.000160354	0.00775698
ENSG00000060339	10:68759975:68759975:1	10	68759975	1	27.5862	18	intron (3)	7898.4	-0.156578	0.110966	-1.41104	0.158233	0.339755	4122.81	-0.75707	0.200577	-3.77446	0.000160354	0.00775698
ENSG00000060339	10:68759976:68759976:1	10	68759976	1	12.1212	18	intron (3)	7898.4	-0.156578	0.110966	-1.41104	0.158233	0.339755	4122.81	-0.75707	0.200577	-3.77446	0.000160354	0.00775698
ENSG00000060339	10:68760183:68760183:1	10	68760183	1	33.3333	18	intron (3)	7898.4	-0.156578	0.110966	-1.41104	0.158233	0.339755	4122.81	-0.75707	0.200577	-3.77446	0.000160354	0.00775698
ENSG00000060339	10:68760247:68760247:1	10	68760247	1	10	18	intron (3)	7898.4	-0.156578	0.110966	-1.41104	0.158233	0.339755	4122.81	-0.75707	0.200577	-3.77446	0.000160354	0.00775698
ENSG00000060339	10:68760248:68760248:1	10	68760248	1	12.2449	18	intron (3)	7898.4	-0.156578	0.110966	-1.41104	0.158233	0.339755	4122.81	-0.75707	0.200577	-3.77446	0.000160354	0.00775698
ENSG00000060339	10:68760743:68760743:1	10	68760743	1	32.5581	18	intron (3)	7898.4	-0.156578	0.110966	-1.41104	0.158233	0.339755	4122.81	-0.75707	0.200577	-3.77446	0.000160354	0.00775698
ENSG00000060339	10:68760744:68760744:1	10	68760744	1	37.5	18	intron (3)	7898.4	-0.156578	0.110966	-1.41104	0.158233	0.339755	4122.81	-0.75707	0.200577	-3.77446	0.000160354	0.00775698
ENSG00000198246	10:71365111:71365111:1	10	71365111	1	24.1379	14	downstream (4)	1779.25	0.687342	0.14249	4.82379	1.40853e-06	2.19044e-05	1856.43	-0.0113548	0.258501	-0.0439256	0.964964	0.986789
ENSG00000198246	10:71366063:71366063:1	10	71366063	1	27.7778	14	downstream (4)	1779.25	0.687342	0.14249	4.82379	1.40853e-06	2.19044e-05	1856.43	-0.0113548	0.258501	-0.0439256	0.964964	0.986789
ENSG00000166295	10:72220101:72220101:1	10	72220101	1	15.7895	5	5'UTR (1), intron (2)	3376.39	0.148249	0.121437	1.22079	0.222164	0.424056	7274.86	0.100815	0.173009	0.582712	0.560087	0.813022
ENSG00000166295	10:72220232:72220232:1	10	72220232	1	6.97674	5	5'UTR (1), intron (2)	3376.39	0.148249	0.121437	1.22079	0.222164	0.424056	7274.86	0.100815	0.173009	0.582712	0.560087	0.813022
ENSG00000166295	10:72234089:72234089:1	10	72234089	1	19.2308	5	3'UTR (3)	3376.39	0.148249	0.121437	1.22079	0.222164	0.424056	7274.86	0.100815	0.173009	0.582712	0.560087	0.813022
ENSG00000166295	10:72234934:72234934:1	10	72234934	1	31.9149	5	3'UTR (3)	3376.39	0.148249	0.121437	1.22079	0.222164	0.424056	7274.86	0.100815	0.173009	0.582712	0.560087	0.813022
ENSG00000166295	10:72234941:72234941:1	10	72234941	1	11.6279	5	3'UTR (3)	3376.39	0.148249	0.121437	1.22079	0.222164	0.424056	7274.86	0.100815	0.173009	0.582712	0.560087	0.813022
ENSG00000166295	10:72234955:72234955:1	10	72234955	1	16.3265	5	3'UTR (3)	3376.39	0.148249	0.121437	1.22079	0.222164	0.424056	7274.86	0.100815	0.173009	0.582712	0.560087	0.813022
ENSG00000166295	10:72234998:72234998:1	10	72234998	1	13.0435	5	3'UTR (3)	3376.39	0.148249	0.121437	1.22079	0.222164	0.424056	7274.86	0.100815	0.173009	0.582712	0.560087	0.813022
ENSG00000166295	10:72235030:72235030:1	10	72235030	1	13.4615	5	3'UTR (3)	3376.39	0.148249	0.121437	1.22079	0.222164	0.424056	7274.86	0.100815	0.173009	0.582712	0.560087	0.813022
ENSG00000166295	10:72235031:72235031:1	10	72235031	1	14	5	3'UTR (3)	3376.39	0.148249	0.121437	1.22079	0.222164	0.424056	7274.86	0.100815	0.173009	0.582712	0.560087	0.813022
intergenic	10:72933248:72933248:-1	10	72933248	-1	15.1515	NA	0	NA	NA	NA	NA	NA	NA	NA	NA	NA	NA	NA	NA
intergenic	10:72933262:72933262:-1	10	72933262	-1	24.3902	NA	0	NA	NA	NA	NA	NA	NA	NA	NA	NA	NA	NA	NA
intergenic	10:72933305:72933305:-1	10	72933305	-1	64	NA	0	NA	NA	NA	NA	NA	NA	NA	NA	NA	NA	NA	NA
intergenic	10:72933934:72933934:-1	10	72933934	-1	14.5455	NA	0	NA	NA	NA	NA	NA	NA	NA	NA	NA	NA	NA	NA
intergenic	10:72933967:72933967:-1	10	72933967	-1	8.10811	NA	0	NA	NA	NA	NA	NA	NA	NA	NA	NA	NA	NA	NA
ENSG00000182180	10:73248973:73248973:-1	10	73248973	-1	9.61538	5	3'UTR (1)	5902.79	0.19541	0.105698	1.84876	0.064493	0.179358	7599.76	0.305033	0.15012	2.03193	0.042161	0.246846
ENSG00000182180	10:73249057:73249057:-1	10	73249057	-1	7.23684	5	3'UTR (1)	5902.79	0.19541	0.105698	1.84876	0.064493	0.179358	7599.76	0.305033	0.15012	2.03193	0.042161	0.246846
ENSG00000182180	10:73249059:73249059:-1	10	73249059	-1	12.8378	5	3'UTR (1)	5902.79	0.19541	0.105698	1.84876	0.064493	0.179358	7599.76	0.305033	0.15012	2.03193	0.042161	0.246846
ENSG00000182180	10:73249083:73249083:-1	10	73249083	-1	10.0629	5	3'UTR (1)	5902.79	0.19541	0.105698	1.84876	0.064493	0.179358	7599.76	0.305033	0.15012	2.03193	0.042161	0.246846
ENSG00000182180	10:73249118:73249118:-1	10	73249118	-1	12.3188	5	3'UTR (1)	5902.79	0.19541	0.105698	1.84876	0.064493	0.179358	7599.76	0.305033	0.15012	2.03193	0.042161	0.246846
ENSG00000182180	10:73249197:73249197:-1	10	73249197	-1	43.2692	5	3'UTR (1)	5902.79	0.19541	0.105698	1.84876	0.064493	0.179358	7599.76	0.305033	0.15012	2.03193	0.042161	0.246846
ENSG00000182180	10:73249207:73249207:-1	10	73249207	-1	6.48148	5	3'UTR (1)	5902.79	0.19541	0.105698	1.84876	0.064493	0.179358	7599.76	0.305033	0.15012	2.03193	0.042161	0.246846
ENSG00000182180	10:73249827:73249827:-1	10	73249827	-1	25.641	5	3'UTR (1)	5902.79	0.19541	0.105698	1.84876	0.064493	0.179358	7599.76	0.305033	0.15012	2.03193	0.042161	0.246846
ENSG00000182180	10:73249833:73249833:-1	10	73249833	-1	20.6897	5	3'UTR (1)	5902.79	0.19541	0.105698	1.84876	0.064493	0.179358	7599.76	0.305033	0.15012	2.03193	0.042161	0.246846
ENSG00000182180	10:73249834:73249834:-1	10	73249834	-1	5.49451	5	3'UTR (1)	5902.79	0.19541	0.105698	1.84876	0.064493	0.179358	7599.76	0.305033	0.15012	2.03193	0.042161	0.246846
ENSG00000182180	10:73250084:73250084:-1	10	73250084	-1	18.75	5	3'UTR (1)	5902.79	0.19541	0.105698	1.84876	0.064493	0.179358	7599.76	0.305033	0.15012	2.03193	0.042161	0.246846
ENSG00000182180	10:73250086:73250086:-1	10	73250086	-1	9.09091	5	3'UTR (1)	5902.79	0.19541	0.105698	1.84876	0.064493	0.179358	7599.76	0.305033	0.15012	2.03193	0.042161	0.246846
intergenic	10:73672051:73672051:-1	10	73672051	-1	29.1667	NA	0	NA	NA	NA	NA	NA	NA	NA	NA	NA	NA	NA	NA
intergenic	10:73672568:73672568:-1	10	73672568	-1	18.1818	NA	0	NA	NA	NA	NA	NA	NA	NA	NA	NA	NA	NA	NA
ENSG00000122378	10:80432562:80432562:1	10	80432562	1	8.51064	6	3'UTR (3), downstream (1)	8526.81	0.220551	0.120456	1.83098	0.0671039	0.184915	8791.58	-0.00130269	0.17232	-0.00755973	0.993968	0.998323
ENSG00000122378	10:80434012:80434012:1	10	80434012	1	25	6	downstream (4)	8526.81	0.220551	0.120456	1.83098	0.0671039	0.184915	8791.58	-0.00130269	0.17232	-0.00755973	0.993968	0.998323
ENSG00000122378	10:80434013:80434013:1	10	80434013	1	9.61538	6	downstream (4)	8526.81	0.220551	0.120456	1.83098	0.0671039	0.184915	8791.58	-0.00130269	0.17232	-0.00755973	0.993968	0.998323
ENSG00000122378	10:80434039:80434039:1	10	80434039	1	16.2791	6	downstream (4)	8526.81	0.220551	0.120456	1.83098	0.0671039	0.184915	8791.58	-0.00130269	0.17232	-0.00755973	0.993968	0.998323
ENSG00000122378	10:80434054:80434054:1	10	80434054	1	25	6	downstream (4)	8526.81	0.220551	0.120456	1.83098	0.0671039	0.184915	8791.58	-0.00130269	0.17232	-0.00755973	0.993968	0.998323
ENSG00000122378	10:80434956:80434956:1	10	80434956	1	25	6	downstream (4)	8526.81	0.220551	0.120456	1.83098	0.0671039	0.184915	8791.58	-0.00130269	0.17232	-0.00755973	0.993968	0.998323
ENSG00000122378	10:80435094:80435094:1	10	80435094	1	12.5	6	downstream (4)	8526.81	0.220551	0.120456	1.83098	0.0671039	0.184915	8791.58	-0.00130269	0.17232	-0.00755973	0.993968	0.998323
ENSG00000122378	10:80435594:80435594:1	10	80435594	1	10.2041	6	downstream (4)	8526.81	0.220551	0.120456	1.83098	0.0671039	0.184915	8791.58	-0.00130269	0.17232	-0.00755973	0.993968	0.998323
ENSG00000122378	10:80435602:80435602:1	10	80435602	1	12.1951	6	downstream (4)	8526.81	0.220551	0.120456	1.83098	0.0671039	0.184915	8791.58	-0.00130269	0.17232	-0.00755973	0.993968	0.998323
ENSG00000122378	10:80435603:80435603:1	10	80435603	1	32.5	6	downstream (4)	8526.81	0.220551	0.120456	1.83098	0.0671039	0.184915	8791.58	-0.00130269	0.17232	-0.00755973	0.993968	0.998323
ENSG00000122378	10:80435712:80435712:1	10	80435712	1	10.6383	6	downstream (4)	8526.81	0.220551	0.120456	1.83098	0.0671039	0.184915	8791.58	-0.00130269	0.17232	-0.00755973	0.993968	0.998323
ENSG00000122378	10:80436177:80436177:1	10	80436177	1	21.0526	6	downstream (4)	8526.81	0.220551	0.120456	1.83098	0.0671039	0.184915	8791.58	-0.00130269	0.17232	-0.00755973	0.993968	0.998323
ENSG00000122378	10:80436227:80436227:1	10	80436227	1	40	6	downstream (4)	8526.81	0.220551	0.120456	1.83098	0.0671039	0.184915	8791.58	-0.00130269	0.17232	-0.00755973	0.993968	0.998323
ENSG00000122378	10:80436232:80436232:1	10	80436232	1	18.1818	6	downstream (4)	8526.81	0.220551	0.120456	1.83098	0.0671039	0.184915	8791.58	-0.00130269	0.17232	-0.00755973	0.993968	0.998323
ENSG00000122378	10:80436287:80436287:1	10	80436287	1	13.7255	6	downstream (4)	8526.81	0.220551	0.120456	1.83098	0.0671039	0.184915	8791.58	-0.00130269	0.17232	-0.00755973	0.993968	0.998323
ENSG00000122378	10:80436326:80436326:1	10	80436326	1	29.8246	6	downstream (4)	8526.81	0.220551	0.120456	1.83098	0.0671039	0.184915	8791.58	-0.00130269	0.17232	-0.00755973	0.993968	0.998323
ENSG00000223482	10:87208302:87208302:-1	10	87208302	-1	13.5135	12	downstream (1)	531.7	0.118895	0.14678	0.810022	0.417927	0.629313	1040.45	0.25987	0.230154	1.12911	0.25885	0.591756
ENSG00000223482	10:87208329:87208329:-1	10	87208329	-1	17.5	12	downstream (1)	531.7	0.118895	0.14678	0.810022	0.417927	0.629313	1040.45	0.25987	0.230154	1.12911	0.25885	0.591756
ENSG00000223482	10:87210480:87210480:-1	10	87210480	-1	32.1429	12	downstream (1)	531.7	0.118895	0.14678	0.810022	0.417927	0.629313	1040.45	0.25987	0.230154	1.12911	0.25885	0.591756
ENSG00000223482	10:87241222:87241222:-1	10	87241222	-1	20	12	intron (1)	531.7	0.118895	0.14678	0.810022	0.417927	0.629313	1040.45	0.25987	0.230154	1.12911	0.25885	0.591756
ENSG00000223482	10:87244693:87244693:-1	10	87244693	-1	26.6667	12	intron (1)	531.7	0.118895	0.14678	0.810022	0.417927	0.629313	1040.45	0.25987	0.230154	1.12911	0.25885	0.591756
intergenic	10:92450543:92450543:-1	10	92450543	-1	18.1818	NA	0	NA	NA	NA	NA	NA	NA	NA	NA	NA	NA	NA	NA
intergenic	10:92451430:92451430:-1	10	92451430	-1	14.6341	NA	0	NA	NA	NA	NA	NA	NA	NA	NA	NA	NA	NA	NA
intergenic	10:92451482:92451482:-1	10	92451482	-1	32.2581	NA	0	NA	NA	NA	NA	NA	NA	NA	NA	NA	NA	NA	NA
intergenic	10:92451507:92451507:-1	10	92451507	-1	10.5263	NA	0	NA	NA	NA	NA	NA	NA	NA	NA	NA	NA	NA	NA
ENSG00000119969	10:94607775:94607775:1	10	94607775	1	9.09091	12	downstream (5)	7553.04	0.116879	0.110638	1.05641	0.290782	0.504536	2737.36	-0.387205	0.250443	-1.54608	0.122085	0.426404
ENSG00000119969	10:94607857:94607857:1	10	94607857	1	10.8696	12	downstream (5)	7553.04	0.116879	0.110638	1.05641	0.290782	0.504536	2737.36	-0.387205	0.250443	-1.54608	0.122085	0.426404
ENSG00000119969	10:94607867:94607867:1	10	94607867	1	24	12	downstream (5)	7553.04	0.116879	0.110638	1.05641	0.290782	0.504536	2737.36	-0.387205	0.250443	-1.54608	0.122085	0.426404
ENSG00000119969	10:94607917:94607917:1	10	94607917	1	33.871	12	downstream (5)	7553.04	0.116879	0.110638	1.05641	0.290782	0.504536	2737.36	-0.387205	0.250443	-1.54608	0.122085	0.426404
ENSG00000119969	10:94607959:94607959:1	10	94607959	1	23.8806	12	downstream (5)	7553.04	0.116879	0.110638	1.05641	0.290782	0.504536	2737.36	-0.387205	0.250443	-1.54608	0.122085	0.426404
ENSG00000119969	10:94607972:94607972:1	10	94607972	1	23.5294	12	downstream (5)	7553.04	0.116879	0.110638	1.05641	0.290782	0.504536	2737.36	-0.387205	0.250443	-1.54608	0.122085	0.426404
ENSG00000119969	10:94607987:94607987:1	10	94607987	1	7.89474	12	downstream (5)	7553.04	0.116879	0.110638	1.05641	0.290782	0.504536	2737.36	-0.387205	0.250443	-1.54608	0.122085	0.426404
ENSG00000119969	10:94610335:94610335:1	10	94610335	1	16.6667	12	downstream (5)	7553.04	0.116879	0.110638	1.05641	0.290782	0.504536	2737.36	-0.387205	0.250443	-1.54608	0.122085	0.426404
ENSG00000119969	10:94610336:94610336:1	10	94610336	1	17.2414	12	downstream (5)	7553.04	0.116879	0.110638	1.05641	0.290782	0.504536	2737.36	-0.387205	0.250443	-1.54608	0.122085	0.426404
ENSG00000119969	10:94610799:94610799:1	10	94610799	1	15	12	downstream (5)	7553.04	0.116879	0.110638	1.05641	0.290782	0.504536	2737.36	-0.387205	0.250443	-1.54608	0.122085	0.426404
ENSG00000119969	10:94612662:94612662:1	10	94612662	1	7.40741	12	downstream (5)	7553.04	0.116879	0.110638	1.05641	0.290782	0.504536	2737.36	-0.387205	0.250443	-1.54608	0.122085	0.426404
ENSG00000119969	10:94612670:94612670:1	10	94612670	1	18.0723	12	downstream (5)	7553.04	0.116879	0.110638	1.05641	0.290782	0.504536	2737.36	-0.387205	0.250443	-1.54608	0.122085	0.426404
ENSG00000119969	10:94612671:94612671:1	10	94612671	1	12.5	12	downstream (5)	7553.04	0.116879	0.110638	1.05641	0.290782	0.504536	2737.36	-0.387205	0.250443	-1.54608	0.122085	0.426404
ENSG00000119969	10:94612687:94612687:1	10	94612687	1	20.6349	12	downstream (5)	7553.04	0.116879	0.110638	1.05641	0.290782	0.504536	2737.36	-0.387205	0.250443	-1.54608	0.122085	0.426404
ENSG00000119969	10:94612726:94612726:1	10	94612726	1	21.3115	12	downstream (5)	7553.04	0.116879	0.110638	1.05641	0.290782	0.504536	2737.36	-0.387205	0.250443	-1.54608	0.122085	0.426404
ENSG00000119969	10:94612727:94612727:1	10	94612727	1	12.3077	12	downstream (5)	7553.04	0.116879	0.110638	1.05641	0.290782	0.504536	2737.36	-0.387205	0.250443	-1.54608	0.122085	0.426404
ENSG00000119969	10:94612805:94612805:1	10	94612805	1	20.202	12	downstream (5)	7553.04	0.116879	0.110638	1.05641	0.290782	0.504536	2737.36	-0.387205	0.250443	-1.54608	0.122085	0.426404
ENSG00000119969	10:94612806:94612806:1	10	94612806	1	17.0213	12	downstream (5)	7553.04	0.116879	0.110638	1.05641	0.290782	0.504536	2737.36	-0.387205	0.250443	-1.54608	0.122085	0.426404
ENSG00000119969	10:94612811:94612811:1	10	94612811	1	10	12	downstream (5)	7553.04	0.116879	0.110638	1.05641	0.290782	0.504536	2737.36	-0.387205	0.250443	-1.54608	0.122085	0.426404
ENSG00000119969	10:94612815:94612815:1	10	94612815	1	29.4118	12	downstream (5)	7553.04	0.116879	0.110638	1.05641	0.290782	0.504536	2737.36	-0.387205	0.250443	-1.54608	0.122085	0.426404
ENSG00000119969	10:94612854:94612854:1	10	94612854	1	7.24638	12	downstream (5)	7553.04	0.116879	0.110638	1.05641	0.290782	0.504536	2737.36	-0.387205	0.250443	-1.54608	0.122085	0.426404
ENSG00000119969	10:94612873:94612873:1	10	94612873	1	11.7647	12	downstream (5)	7553.04	0.116879	0.110638	1.05641	0.290782	0.504536	2737.36	-0.387205	0.250443	-1.54608	0.122085	0.426404
ENSG00000177853	10:96165185:96165185:1	10	96165185	1	73.913	10	downstream (2)	8523.3	0.273464	0.131185	2.08456	0.037109	0.119048	3791.76	-0.0212365	0.193802	-0.109578	0.912744	0.967051
ENSG00000177853	10:96165187:96165187:1	10	96165187	1	20	10	downstream (2)	8523.3	0.273464	0.131185	2.08456	0.037109	0.119048	3791.76	-0.0212365	0.193802	-0.109578	0.912744	0.967051
ENSG00000177853	10:96165198:96165198:1	10	96165198	1	25	10	downstream (2)	8523.3	0.273464	0.131185	2.08456	0.037109	0.119048	3791.76	-0.0212365	0.193802	-0.109578	0.912744	0.967051
ENSG00000177853	10:96165203:96165203:1	10	96165203	1	52.1739	10	downstream (2)	8523.3	0.273464	0.131185	2.08456	0.037109	0.119048	3791.76	-0.0212365	0.193802	-0.109578	0.912744	0.967051
ENSG00000177853	10:96165238:96165238:1	10	96165238	1	42.8571	10	downstream (2)	8523.3	0.273464	0.131185	2.08456	0.037109	0.119048	3791.76	-0.0212365	0.193802	-0.109578	0.912744	0.967051
ENSG00000177853	10:96165288:96165288:1	10	96165288	1	52.6316	10	downstream (2)	8523.3	0.273464	0.131185	2.08456	0.037109	0.119048	3791.76	-0.0212365	0.193802	-0.109578	0.912744	0.967051
ENSG00000177853	10:96165291:96165291:1	10	96165291	1	22.7273	10	downstream (2)	8523.3	0.273464	0.131185	2.08456	0.037109	0.119048	3791.76	-0.0212365	0.193802	-0.109578	0.912744	0.967051
ENSG00000177853	10:96166724:96166724:1	10	96166724	1	45	10	downstream (2)	8523.3	0.273464	0.131185	2.08456	0.037109	0.119048	3791.76	-0.0212365	0.193802	-0.109578	0.912744	0.967051
ENSG00000177853	10:96166742:96166742:1	10	96166742	1	23.0769	10	downstream (2)	8523.3	0.273464	0.131185	2.08456	0.037109	0.119048	3791.76	-0.0212365	0.193802	-0.109578	0.912744	0.967051
ENSG00000177853	10:96167277:96167277:1	10	96167277	1	37.5	10	downstream (2)	8523.3	0.273464	0.131185	2.08456	0.037109	0.119048	3791.76	-0.0212365	0.193802	-0.109578	0.912744	0.967051
ENSG00000177853	10:96167379:96167379:1	10	96167379	1	20	10	downstream (2)	8523.3	0.273464	0.131185	2.08456	0.037109	0.119048	3791.76	-0.0212365	0.193802	-0.109578	0.912744	0.967051
ENSG00000120053	10:99399514:99399514:-1	10	99399514	-1	14.8148	3	intron (1)	8325.26	0.291374	0.112714	2.58509	0.0097355	0.0429503	5461	-0.44418	0.173029	-2.56709	0.0102556	0.111458
ENSG00000120053	10:99402080:99402080:-1	10	99402080	-1	25	3	intron (1)	8325.26	0.291374	0.112714	2.58509	0.0097355	0.0429503	5461	-0.44418	0.173029	-2.56709	0.0102556	0.111458
ENSG00000023839	10:99796448:99796448:1	10	99796448	1	27.7778	11	intron (1)	16821.9	1.43218	0.109832	13.0397	7.27208e-39	2.02362e-36	9751.13	-0.31431	0.193381	-1.62534	0.10409	0.391261
ENSG00000149311	11:108365742:108365742:1	11	108365742	1	21.6216	30	3'UTR (2), downstream (2)	8339.34	0.233634	0.121401	1.92449	0.0542932	0.157982	2409.73	-0.546535	0.232164	-2.3541	0.0185678	0.156256
ENSG00000149311	11:108365796:108365796:1	11	108365796	1	21.6216	30	3'UTR (2), downstream (2)	8339.34	0.233634	0.121401	1.92449	0.0542932	0.157982	2409.73	-0.546535	0.232164	-2.3541	0.0185678	0.156256
ENSG00000149311	11:108365882:108365882:1	11	108365882	1	16.6667	30	3'UTR (2), downstream (2)	8339.34	0.233634	0.121401	1.92449	0.0542932	0.157982	2409.73	-0.546535	0.232164	-2.3541	0.0185678	0.156256
ENSG00000149311	11:108365909:108365909:1	11	108365909	1	37.7778	30	3'UTR (2), downstream (2)	8339.34	0.233634	0.121401	1.92449	0.0542932	0.157982	2409.73	-0.546535	0.232164	-2.3541	0.0185678	0.156256
ENSG00000149311	11:108367088:108367088:1	11	108367088	1	13.5135	30	3'UTR (2), downstream (2)	8339.34	0.233634	0.121401	1.92449	0.0542932	0.157982	2409.73	-0.546535	0.232164	-2.3541	0.0185678	0.156256
ENSG00000149311	11:108367105:108367105:1	11	108367105	1	17.3913	30	3'UTR (2), downstream (2)	8339.34	0.233634	0.121401	1.92449	0.0542932	0.157982	2409.73	-0.546535	0.232164	-2.3541	0.0185678	0.156256
ENSG00000149311	11:108367163:108367163:1	11	108367163	1	10.6061	30	3'UTR (2), downstream (2)	8339.34	0.233634	0.121401	1.92449	0.0542932	0.157982	2409.73	-0.546535	0.232164	-2.3541	0.0185678	0.156256
ENSG00000149311	11:108367226:108367226:1	11	108367226	1	24.1379	30	3'UTR (2), downstream (2)	8339.34	0.233634	0.121401	1.92449	0.0542932	0.157982	2409.73	-0.546535	0.232164	-2.3541	0.0185678	0.156256
ENSG00000149311	11:108367230:108367230:1	11	108367230	1	22.5806	30	3'UTR (2), downstream (2)	8339.34	0.233634	0.121401	1.92449	0.0542932	0.157982	2409.73	-0.546535	0.232164	-2.3541	0.0185678	0.156256
ENSG00000149311	11:108367248:108367248:1	11	108367248	1	34.4828	30	3'UTR (2), downstream (2)	8339.34	0.233634	0.121401	1.92449	0.0542932	0.157982	2409.73	-0.546535	0.232164	-2.3541	0.0185678	0.156256
ENSG00000170145	11:111728550:111728550:1	11	111728550	1	19.2308	2	3'UTR (1)	3182.41	-0.32124	0.119509	-2.68799	0.0071884	0.0338203	1256.77	-0.159254	0.206061	-0.772851	0.439611	0.739185
ENSG00000170145	11:111728551:111728551:1	11	111728551	1	25.9259	2	3'UTR (1)	3182.41	-0.32124	0.119509	-2.68799	0.0071884	0.0338203	1256.77	-0.159254	0.206061	-0.772851	0.439611	0.739185
ENSG00000170145	11:111728673:111728673:1	11	111728673	1	42.3077	2	3'UTR (1)	3182.41	-0.32124	0.119509	-2.68799	0.0071884	0.0338203	1256.77	-0.159254	0.206061	-0.772851	0.439611	0.739185
ENSG00000170145	11:111728679:111728679:1	11	111728679	1	16	2	3'UTR (1)	3182.41	-0.32124	0.119509	-2.68799	0.0071884	0.0338203	1256.77	-0.159254	0.206061	-0.772851	0.439611	0.739185
ENSG00000170145	11:111728747:111728747:1	11	111728747	1	11.7647	2	3'UTR (1)	3182.41	-0.32124	0.119509	-2.68799	0.0071884	0.0338203	1256.77	-0.159254	0.206061	-0.772851	0.439611	0.739185
ENSG00000086848	11:111783206:111783206:-1	11	111783206	-1	15.3846	17	downstream (4)	558.124	0.284208	0.14218	1.99893	0.0456158	0.13918	540.496	-0.15854	0.183286	-0.864983	0.387048	0.704393
ENSG00000186166	11:119001801:119001801:1	11	119001801	1	34.4828	10	3'UTR (1), intron (1)	998.104	0.322291	0.148598	2.16887	0.0300922	0.101827	469.887	0.13807	0.329561	0.418952	0.675251	0.87577
ENSG00000186166	11:119001815:119001815:1	11	119001815	1	21.875	10	3'UTR (1), intron (1)	998.104	0.322291	0.148598	2.16887	0.0300922	0.101827	469.887	0.13807	0.329561	0.418952	0.675251	0.87577
ENSG00000186166	11:119002886:119002886:1	11	119002886	1	26.087	10	intron (2)	998.104	0.322291	0.148598	2.16887	0.0300922	0.101827	469.887	0.13807	0.329561	0.418952	0.675251	0.87577
ENSG00000186166	11:119004508:119004508:1	11	119004508	1	20	10	intron (2)	998.104	0.322291	0.148598	2.16887	0.0300922	0.101827	469.887	0.13807	0.329561	0.418952	0.675251	0.87577
ENSG00000186166	11:119004726:119004726:1	11	119004726	1	47.3684	10	intron (2)	998.104	0.322291	0.148598	2.16887	0.0300922	0.101827	469.887	0.13807	0.329561	0.418952	0.675251	0.87577
ENSG00000186166	11:119004939:119004939:1	11	119004939	1	29.1667	10	intron (2)	998.104	0.322291	0.148598	2.16887	0.0300922	0.101827	469.887	0.13807	0.329561	0.418952	0.675251	0.87577
ENSG00000186166	11:119004949:119004949:1	11	119004949	1	26.9231	10	intron (2)	998.104	0.322291	0.148598	2.16887	0.0300922	0.101827	469.887	0.13807	0.329561	0.418952	0.675251	0.87577
ENSG00000186166	11:119007310:119007310:1	11	119007310	1	36.8421	10	intron (2)	998.104	0.322291	0.148598	2.16887	0.0300922	0.101827	469.887	0.13807	0.329561	0.418952	0.675251	0.87577
ENSG00000186166	11:119007589:119007589:1	11	119007589	1	18.5185	10	intron (2)	998.104	0.322291	0.148598	2.16887	0.0300922	0.101827	469.887	0.13807	0.329561	0.418952	0.675251	0.87577
ENSG00000186166	11:119007607:119007607:1	11	119007607	1	12.5	10	intron (2)	998.104	0.322291	0.148598	2.16887	0.0300922	0.101827	469.887	0.13807	0.329561	0.418952	0.675251	0.87577
ENSG00000186166	11:119007663:119007663:1	11	119007663	1	50	10	intron (2)	998.104	0.322291	0.148598	2.16887	0.0300922	0.101827	469.887	0.13807	0.329561	0.418952	0.675251	0.87577
ENSG00000186166	11:119007707:119007707:1	11	119007707	1	80	10	intron (2)	998.104	0.322291	0.148598	2.16887	0.0300922	0.101827	469.887	0.13807	0.329561	0.418952	0.675251	0.87577
ENSG00000186166	11:119007734:119007734:1	11	119007734	1	27.2727	10	intron (2)	998.104	0.322291	0.148598	2.16887	0.0300922	0.101827	469.887	0.13807	0.329561	0.418952	0.675251	0.87577
ENSG00000186166	11:119007749:119007749:1	11	119007749	1	13.7931	10	intron (2)	998.104	0.322291	0.148598	2.16887	0.0300922	0.101827	469.887	0.13807	0.329561	0.418952	0.675251	0.87577
ENSG00000186166	11:119007761:119007761:1	11	119007761	1	15.625	10	intron (2)	998.104	0.322291	0.148598	2.16887	0.0300922	0.101827	469.887	0.13807	0.329561	0.418952	0.675251	0.87577
ENSG00000186166	11:119009244:119009244:1	11	119009244	1	28.125	10	intron (2)	998.104	0.322291	0.148598	2.16887	0.0300922	0.101827	469.887	0.13807	0.329561	0.418952	0.675251	0.87577
ENSG00000186166	11:119009253:119009253:1	11	119009253	1	16.6667	10	intron (2)	998.104	0.322291	0.148598	2.16887	0.0300922	0.101827	469.887	0.13807	0.329561	0.418952	0.675251	0.87577
ENSG00000186166	11:119009874:119009874:1	11	119009874	1	21.0526	10	intron (2)	998.104	0.322291	0.148598	2.16887	0.0300922	0.101827	469.887	0.13807	0.329561	0.418952	0.675251	0.87577
ENSG00000186166	11:119009890:119009890:1	11	119009890	1	23.5294	10	intron (2)	998.104	0.322291	0.148598	2.16887	0.0300922	0.101827	469.887	0.13807	0.329561	0.418952	0.675251	0.87577
ENSG00000186166	11:119009891:119009891:1	11	119009891	1	25.8065	10	intron (2)	998.104	0.322291	0.148598	2.16887	0.0300922	0.101827	469.887	0.13807	0.329561	0.418952	0.675251	0.87577
ENSG00000186166	11:119009913:119009913:1	11	119009913	1	15.3846	10	intron (2)	998.104	0.322291	0.148598	2.16887	0.0300922	0.101827	469.887	0.13807	0.329561	0.418952	0.675251	0.87577
ENSG00000186166	11:119009967:119009967:1	11	119009967	1	26.087	10	intron (2)	998.104	0.322291	0.148598	2.16887	0.0300922	0.101827	469.887	0.13807	0.329561	0.418952	0.675251	0.87577
ENSG00000186166	11:119009981:119009981:1	11	119009981	1	14.2857	10	intron (2)	998.104	0.322291	0.148598	2.16887	0.0300922	0.101827	469.887	0.13807	0.329561	0.418952	0.675251	0.87577
ENSG00000186166	11:119009986:119009986:1	11	119009986	1	12.1951	10	intron (2)	998.104	0.322291	0.148598	2.16887	0.0300922	0.101827	469.887	0.13807	0.329561	0.418952	0.675251	0.87577
ENSG00000186166	11:119009993:119009993:1	11	119009993	1	15	10	intron (2)	998.104	0.322291	0.148598	2.16887	0.0300922	0.101827	469.887	0.13807	0.329561	0.418952	0.675251	0.87577
ENSG00000186166	11:119010003:119010003:1	11	119010003	1	12.5	10	intron (2)	998.104	0.322291	0.148598	2.16887	0.0300922	0.101827	469.887	0.13807	0.329561	0.418952	0.675251	0.87577
ENSG00000186166	11:119010009:119010009:1	11	119010009	1	45.1613	10	intron (2)	998.104	0.322291	0.148598	2.16887	0.0300922	0.101827	469.887	0.13807	0.329561	0.418952	0.675251	0.87577
ENSG00000149554	11:125656266:125656266:1	11	125656266	1	20.1923	18	3'UTR (3), downstream (2), intron (1)	3066.38	0.00692322	0.123051	0.0562629	0.955132	0.979529	2785.35	-0.234804	0.159915	-1.4683	0.142022	0.458763
ENSG00000165526	11:126209146:126209146:-1	11	126209146	-1	66.6667	9	intron (2)	1676.95	-0.189002	0.112343	-1.68237	0.0924977	0.23294	1735.44	0.0474939	0.193503	0.245443	0.806114	0.93121
ENSG00000150455	11:126295135:126295135:1	11	126295135	1	17.2414	7	downstream (3)	517.887	0.0149144	0.139286	0.107078	0.914727	0.959281	566.453	-0.044002	0.187047	-0.235246	0.814018	0.934495
ENSG00000150455	11:126296791:126296791:1	11	126296791	1	18.9189	7	downstream (3)	517.887	0.0149144	0.139286	0.107078	0.914727	0.959281	566.453	-0.044002	0.187047	-0.235246	0.814018	0.934495
ENSG00000150455	11:126296793:126296793:1	11	126296793	1	10.8108	7	downstream (3)	517.887	0.0149144	0.139286	0.107078	0.914727	0.959281	566.453	-0.044002	0.187047	-0.235246	0.814018	0.934495
ENSG00000150455	11:126297873:126297873:1	11	126297873	1	23.8095	7	downstream (3)	517.887	0.0149144	0.139286	0.107078	0.914727	0.959281	566.453	-0.044002	0.187047	-0.235246	0.814018	0.934495
intergenic	11:126349112:126349112:1	11	126349112	1	35	NA	0	NA	NA	NA	NA	NA	NA	NA	NA	NA	NA	NA	NA
intergenic	11:126349141:126349141:1	11	126349141	1	68.5714	NA	0	NA	NA	NA	NA	NA	NA	NA	NA	NA	NA	NA	NA
ENSG00000110696	11:16756370:16756370:1	11	16756370	1	35.7143	10	downstream (1)	6313.86	0.0214425	0.109478	0.195862	0.844719	0.924449	6714.28	0.284141	0.159941	1.77654	0.0756447	0.336618
ENSG00000110696	11:16756396:16756396:1	11	16756396	1	10.8108	10	downstream (1)	6313.86	0.0214425	0.109478	0.195862	0.844719	0.924449	6714.28	0.284141	0.159941	1.77654	0.0756447	0.336618
ENSG00000110696	11:16756399:16756399:1	11	16756399	1	12.8205	10	downstream (1)	6313.86	0.0214425	0.109478	0.195862	0.844719	0.924449	6714.28	0.284141	0.159941	1.77654	0.0756447	0.336618
ENSG00000110696	11:16756409:16756409:1	11	16756409	1	30.4348	10	downstream (1)	6313.86	0.0214425	0.109478	0.195862	0.844719	0.924449	6714.28	0.284141	0.159941	1.77654	0.0756447	0.336618
ENSG00000110696	11:16756435:16756435:1	11	16756435	1	13.9535	10	downstream (1)	6313.86	0.0214425	0.109478	0.195862	0.844719	0.924449	6714.28	0.284141	0.159941	1.77654	0.0756447	0.336618
ENSG00000110696	11:16756436:16756436:1	11	16756436	1	34.0909	10	downstream (1)	6313.86	0.0214425	0.109478	0.195862	0.844719	0.924449	6714.28	0.284141	0.159941	1.77654	0.0756447	0.336618
ENSG00000110696	11:16756451:16756451:1	11	16756451	1	27.451	10	downstream (1)	6313.86	0.0214425	0.109478	0.195862	0.844719	0.924449	6714.28	0.284141	0.159941	1.77654	0.0756447	0.336618
ENSG00000110696	11:16756530:16756530:1	11	16756530	1	20	10	downstream (1)	6313.86	0.0214425	0.109478	0.195862	0.844719	0.924449	6714.28	0.284141	0.159941	1.77654	0.0756447	0.336618
ENSG00000110696	11:16756531:16756531:1	11	16756531	1	38.2979	10	downstream (1)	6313.86	0.0214425	0.109478	0.195862	0.844719	0.924449	6714.28	0.284141	0.159941	1.77654	0.0756447	0.336618
ENSG00000110696	11:16756543:16756543:1	11	16756543	1	10.3448	10	downstream (1)	6313.86	0.0214425	0.109478	0.195862	0.844719	0.924449	6714.28	0.284141	0.159941	1.77654	0.0756447	0.336618
ENSG00000110696	11:16756647:16756647:1	11	16756647	1	44.8276	10	downstream (1)	6313.86	0.0214425	0.109478	0.195862	0.844719	0.924449	6714.28	0.284141	0.159941	1.77654	0.0756447	0.336618
ENSG00000110696	11:16756651:16756651:1	11	16756651	1	17.2414	10	downstream (1)	6313.86	0.0214425	0.109478	0.195862	0.844719	0.924449	6714.28	0.284141	0.159941	1.77654	0.0756447	0.336618
ENSG00000110696	11:16756722:16756722:1	11	16756722	1	63.3333	10	downstream (1)	6313.86	0.0214425	0.109478	0.195862	0.844719	0.924449	6714.28	0.284141	0.159941	1.77654	0.0756447	0.336618
ENSG00000110696	11:16756723:16756723:1	11	16756723	1	70.9677	10	downstream (1)	6313.86	0.0214425	0.109478	0.195862	0.844719	0.924449	6714.28	0.284141	0.159941	1.77654	0.0756447	0.336618
ENSG00000110700	11:17076686:17076686:-1	11	17076686	-1	14.7059	10	intron (1)	20562.9	0.289584	0.114832	2.52181	0.0116752	0.0496477	56454.6	0.781228	0.184072	4.24415	2.19425e-05	0.00203976
ENSG00000188211	11:17377223:17377223:1	11	17377223	1	6.84932	2	3'UTR (1)	4304.79	1.44193	0.123708	11.6559	2.14068e-31	3.93157e-29	1565.16	-0.530614	0.287949	-1.84273	0.0653677	0.310583
ENSG00000188211	11:17377224:17377224:1	11	17377224	1	9.58904	2	3'UTR (1)	4304.79	1.44193	0.123708	11.6559	2.14068e-31	3.93157e-29	1565.16	-0.530614	0.287949	-1.84273	0.0653677	0.310583
intergenic	11:26584296:26584296:-1	11	26584296	-1	17.8571	NA	0	NA	NA	NA	NA	NA	NA	NA	NA	NA	NA	NA	NA
ENSG00000254560	11:27067478:27067478:-1	11	27067478	-1	11.4286	4	intron (3)	637.793	0.260325	0.127474	2.04218	0.0411334	0.128581	1705.62	0.192028	0.217196	0.884126	0.376628	0.695217
ENSG00000254560	11:27067564:27067564:-1	11	27067564	-1	24	4	intron (3)	637.793	0.260325	0.127474	2.04218	0.0411334	0.128581	1705.62	0.192028	0.217196	0.884126	0.376628	0.695217
ENSG00000254560	11:27069410:27069410:-1	11	27069410	-1	12.5	4	intron (3)	637.793	0.260325	0.127474	2.04218	0.0411334	0.128581	1705.62	0.192028	0.217196	0.884126	0.376628	0.695217
intergenic	11:27235690:27235690:1	11	27235690	1	17.9487	NA	0	NA	NA	NA	NA	NA	NA	NA	NA	NA	NA	NA	NA
intergenic	11:27235705:27235705:1	11	27235705	1	30	NA	0	NA	NA	NA	NA	NA	NA	NA	NA	NA	NA	NA	NA
ENSG00000109881	11:27338198:27338198:-1	11	27338198	-1	11.6667	3	downstream (2)	3537.94	0.173704	0.108047	1.60767	0.107907	0.259707	5060.16	-0.0250025	0.18537	-0.134879	0.892708	0.959308
intergenic	11:27492619:27492619:-1	11	27492619	-1	23.5294	NA	0	NA	NA	NA	NA	NA	NA	NA	NA	NA	NA	NA	NA
ENSG00000170946	11:31431024:31431024:1	11	31431024	1	20	11	3'UTR (1)	1317.48	-0.0260243	0.117413	-0.221648	0.824588	0.913329	1391.62	-0.0741193	0.198836	-0.372765	0.709323	0.890473
ENSG00000170946	11:31431051:31431051:1	11	31431051	1	17.3913	11	3'UTR (1)	1317.48	-0.0260243	0.117413	-0.221648	0.824588	0.913329	1391.62	-0.0741193	0.198836	-0.372765	0.709323	0.890473
ENSG00000170946	11:31431089:31431089:1	11	31431089	1	62	11	3'UTR (1)	1317.48	-0.0260243	0.117413	-0.221648	0.824588	0.913329	1391.62	-0.0741193	0.198836	-0.372765	0.709323	0.890473
ENSG00000170946	11:31431137:31431137:1	11	31431137	1	17.5439	11	3'UTR (1)	1317.48	-0.0260243	0.117413	-0.221648	0.824588	0.913329	1391.62	-0.0741193	0.198836	-0.372765	0.709323	0.890473
ENSG00000170946	11:31431147:31431147:1	11	31431147	1	8.47458	11	3'UTR (1)	1317.48	-0.0260243	0.117413	-0.221648	0.824588	0.913329	1391.62	-0.0741193	0.198836	-0.372765	0.709323	0.890473
ENSG00000170946	11:31431200:31431200:1	11	31431200	1	11.3636	11	3'UTR (1)	1317.48	-0.0260243	0.117413	-0.221648	0.824588	0.913329	1391.62	-0.0741193	0.198836	-0.372765	0.709323	0.890473
ENSG00000170946	11:31431203:31431203:1	11	31431203	1	26.6667	11	3'UTR (1)	1317.48	-0.0260243	0.117413	-0.221648	0.824588	0.913329	1391.62	-0.0741193	0.198836	-0.372765	0.709323	0.890473
ENSG00000170946	11:31431241:31431241:1	11	31431241	1	70.9677	11	3'UTR (1)	1317.48	-0.0260243	0.117413	-0.221648	0.824588	0.913329	1391.62	-0.0741193	0.198836	-0.372765	0.709323	0.890473
ENSG00000170946	11:31431242:31431242:1	11	31431242	1	34.375	11	3'UTR (1)	1317.48	-0.0260243	0.117413	-0.221648	0.824588	0.913329	1391.62	-0.0741193	0.198836	-0.372765	0.709323	0.890473
ENSG00000170946	11:31431610:31431610:1	11	31431610	1	74.0741	11	3'UTR (1)	1317.48	-0.0260243	0.117413	-0.221648	0.824588	0.913329	1391.62	-0.0741193	0.198836	-0.372765	0.709323	0.890473
ENSG00000170946	11:31431626:31431626:1	11	31431626	1	42.1053	11	3'UTR (1)	1317.48	-0.0260243	0.117413	-0.221648	0.824588	0.913329	1391.62	-0.0741193	0.198836	-0.372765	0.709323	0.890473
ENSG00000170946	11:31431672:31431672:1	11	31431672	1	62.5	11	3'UTR (1)	1317.48	-0.0260243	0.117413	-0.221648	0.824588	0.913329	1391.62	-0.0741193	0.198836	-0.372765	0.709323	0.890473
ENSG00000170946	11:31431721:31431721:1	11	31431721	1	32.5	11	3'UTR (1)	1317.48	-0.0260243	0.117413	-0.221648	0.824588	0.913329	1391.62	-0.0741193	0.198836	-0.372765	0.709323	0.890473
ENSG00000148950	11:31444767:31444767:-1	11	31444767	-1	13.7931	16	intron (2)	936.825	-0.0389198	0.122796	-0.316947	0.751284	0.869334	1911.72	0.104915	0.169134	0.620304	0.535057	0.798712
intergenic	11:43857012:43857012:1	11	43857012	1	17.2414	NA	0	NA	NA	NA	NA	NA	NA	NA	NA	NA	NA	NA	NA
intergenic	11:43857059:43857059:1	11	43857059	1	24	NA	0	NA	NA	NA	NA	NA	NA	NA	NA	NA	NA	NA	NA
intergenic	11:43860257:43860257:1	11	43860257	1	29.0323	NA	0	NA	NA	NA	NA	NA	NA	NA	NA	NA	NA	NA	NA
intergenic	11:43860780:43860780:1	11	43860780	1	36	NA	0	NA	NA	NA	NA	NA	NA	NA	NA	NA	NA	NA	NA
intergenic	11:43860783:43860783:1	11	43860783	1	15.3846	NA	0	NA	NA	NA	NA	NA	NA	NA	NA	NA	NA	NA	NA
intergenic	11:43860827:43860827:1	11	43860827	1	22.2222	NA	0	NA	NA	NA	NA	NA	NA	NA	NA	NA	NA	NA	NA
intergenic	11:43860852:43860852:1	11	43860852	1	15.625	NA	0	NA	NA	NA	NA	NA	NA	NA	NA	NA	NA	NA	NA
intergenic	11:43862867:43862867:1	11	43862867	1	27.7778	NA	0	NA	NA	NA	NA	NA	NA	NA	NA	NA	NA	NA	NA
intergenic	11:43863675:43863675:1	11	43863675	1	29.4118	NA	0	NA	NA	NA	NA	NA	NA	NA	NA	NA	NA	NA	NA
intergenic	11:43863713:43863713:1	11	43863713	1	20.8333	NA	0	NA	NA	NA	NA	NA	NA	NA	NA	NA	NA	NA	NA
intergenic	11:43863718:43863718:1	11	43863718	1	20	NA	0	NA	NA	NA	NA	NA	NA	NA	NA	NA	NA	NA	NA
intergenic	11:43863730:43863730:1	11	43863730	1	30	NA	0	NA	NA	NA	NA	NA	NA	NA	NA	NA	NA	NA	NA
intergenic	11:43863740:43863740:1	11	43863740	1	40.7407	NA	0	NA	NA	NA	NA	NA	NA	NA	NA	NA	NA	NA	NA
intergenic	11:43863742:43863742:1	11	43863742	1	36	NA	0	NA	NA	NA	NA	NA	NA	NA	NA	NA	NA	NA	NA
intergenic	11:43863836:43863836:1	11	43863836	1	21.2121	NA	0	NA	NA	NA	NA	NA	NA	NA	NA	NA	NA	NA	NA
intergenic	11:43863862:43863862:1	11	43863862	1	22.5806	NA	0	NA	NA	NA	NA	NA	NA	NA	NA	NA	NA	NA	NA
intergenic	11:43863863:43863863:1	11	43863863	1	35.4839	NA	0	NA	NA	NA	NA	NA	NA	NA	NA	NA	NA	NA	NA
intergenic	11:43866184:43866184:1	11	43866184	1	25.9259	NA	0	NA	NA	NA	NA	NA	NA	NA	NA	NA	NA	NA	NA
intergenic	11:43866243:43866243:1	11	43866243	1	11.5385	NA	0	NA	NA	NA	NA	NA	NA	NA	NA	NA	NA	NA	NA
intergenic	11:43866343:43866343:1	11	43866343	1	17.8571	NA	0	NA	NA	NA	NA	NA	NA	NA	NA	NA	NA	NA	NA
intergenic	11:43866365:43866365:1	11	43866365	1	21.2121	NA	0	NA	NA	NA	NA	NA	NA	NA	NA	NA	NA	NA	NA
ENSG00000180210	11:46733333:46733333:1	11	46733333	1	20.6897	5	intron (1)	9253.02	0.742477	0.124053	5.98516	2.16173e-09	5.99734e-08	4995.33	-0.510177	0.174325	-2.92658	0.00342715	0.0551332
ENSG00000180210	11:46733477:46733477:1	11	46733477	1	28.5714	5	intron (1)	9253.02	0.742477	0.124053	5.98516	2.16173e-09	5.99734e-08	4995.33	-0.510177	0.174325	-2.92658	0.00342715	0.0551332
ENSG00000180210	11:46738668:46738668:1	11	46738668	1	30.7692	5	intron (1)	9253.02	0.742477	0.124053	5.98516	2.16173e-09	5.99734e-08	4995.33	-0.510177	0.174325	-2.92658	0.00342715	0.0551332
ENSG00000149182	11:47168705:47168705:-1	11	47168705	-1	23.5294	30	intron (2)	3603.89	-0.186026	0.113482	-1.63926	0.101158	0.247899	2474.04	-0.297829	0.157778	-1.88764	0.059074	0.294216
ENSG00000149150	11:57495406:57495406:-1	11	57495406	-1	31.8182	10	intron (2)	13926.2	0.587134	0.112419	5.22274	1.76299e-07	3.32093e-06	14260.9	0.17297	0.155633	1.11139	0.266399	0.597524
ENSG00000149150	11:57495703:57495703:-1	11	57495703	-1	26	10	intron (2)	13926.2	0.587134	0.112419	5.22274	1.76299e-07	3.32093e-06	14260.9	0.17297	0.155633	1.11139	0.266399	0.597524
ENSG00000149150	11:57495786:57495786:-1	11	57495786	-1	15.2542	10	intron (2)	13926.2	0.587134	0.112419	5.22274	1.76299e-07	3.32093e-06	14260.9	0.17297	0.155633	1.11139	0.266399	0.597524
ENSG00000166801	11:59146712:59146712:1	11	59146712	1	25.7143	11	intron (3)	4553.22	0.539539	0.103854	5.19516	2.04541e-07	3.79454e-06	3381.29	0.0108087	0.216806	0.0498541	0.960239	0.984431
ENSG00000166801	11:59146716:59146716:1	11	59146716	1	55.5556	11	intron (3)	4553.22	0.539539	0.103854	5.19516	2.04541e-07	3.79454e-06	3381.29	0.0108087	0.216806	0.0498541	0.960239	0.984431
ENSG00000166801	11:59146771:59146771:1	11	59146771	1	26.9231	11	intron (3)	4553.22	0.539539	0.103854	5.19516	2.04541e-07	3.79454e-06	3381.29	0.0108087	0.216806	0.0498541	0.960239	0.984431
ENSG00000166801	11:59146779:59146779:1	11	59146779	1	41.3793	11	intron (3)	4553.22	0.539539	0.103854	5.19516	2.04541e-07	3.79454e-06	3381.29	0.0108087	0.216806	0.0498541	0.960239	0.984431
ENSG00000166801	11:59146786:59146786:1	11	59146786	1	16.129	11	intron (3)	4553.22	0.539539	0.103854	5.19516	2.04541e-07	3.79454e-06	3381.29	0.0108087	0.216806	0.0498541	0.960239	0.984431
ENSG00000166801	11:59147348:59147348:1	11	59147348	1	38.7097	11	intron (3)	4553.22	0.539539	0.103854	5.19516	2.04541e-07	3.79454e-06	3381.29	0.0108087	0.216806	0.0498541	0.960239	0.984431
ENSG00000166801	11:59147349:59147349:1	11	59147349	1	72.7273	11	intron (3)	4553.22	0.539539	0.103854	5.19516	2.04541e-07	3.79454e-06	3381.29	0.0108087	0.216806	0.0498541	0.960239	0.984431
ENSG00000166801	11:59147371:59147371:1	11	59147371	1	41.9355	11	intron (3)	4553.22	0.539539	0.103854	5.19516	2.04541e-07	3.79454e-06	3381.29	0.0108087	0.216806	0.0498541	0.960239	0.984431
ENSG00000166801	11:59147373:59147373:1	11	59147373	1	77.4194	11	intron (3)	4553.22	0.539539	0.103854	5.19516	2.04541e-07	3.79454e-06	3381.29	0.0108087	0.216806	0.0498541	0.960239	0.984431
ENSG00000166801	11:59147381:59147381:1	11	59147381	1	29.4118	11	intron (3)	4553.22	0.539539	0.103854	5.19516	2.04541e-07	3.79454e-06	3381.29	0.0108087	0.216806	0.0498541	0.960239	0.984431
ENSG00000162144	11:61351656:61351656:-1	11	61351656	-1	43.3333	21	intron (3)	4644.62	0.0492674	0.121881	0.404227	0.686046	0.829542	5836.15	0.151699	0.164665	0.921261	0.356914	0.678191
ENSG00000162144	11:61351791:61351791:-1	11	61351791	-1	42.3077	21	intron (3)	4644.62	0.0492674	0.121881	0.404227	0.686046	0.829542	5836.15	0.151699	0.164665	0.921261	0.356914	0.678191
ENSG00000162144	11:61352099:61352099:-1	11	61352099	-1	33.3333	21	intron (3)	4644.62	0.0492674	0.121881	0.404227	0.686046	0.829542	5836.15	0.151699	0.164665	0.921261	0.356914	0.678191
ENSG00000149532	11:61410195:61410195:-1	11	61410195	-1	27.907	26	intron (3)	18181.2	0.0758131	0.10205	0.742901	0.457542	0.66167	12826	0.131654	0.167991	0.783692	0.433221	0.735681
ENSG00000149532	11:61410267:61410267:-1	11	61410267	-1	13.9535	26	intron (3)	18181.2	0.0758131	0.10205	0.742901	0.457542	0.66167	12826	0.131654	0.167991	0.783692	0.433221	0.735681
ENSG00000149532	11:61410351:61410351:-1	11	61410351	-1	11.7647	26	intron (3)	18181.2	0.0758131	0.10205	0.742901	0.457542	0.66167	12826	0.131654	0.167991	0.783692	0.433221	0.735681
ENSG00000149532	11:61410359:61410359:-1	11	61410359	-1	39.4737	26	intron (3)	18181.2	0.0758131	0.10205	0.742901	0.457542	0.66167	12826	0.131654	0.167991	0.783692	0.433221	0.735681
ENSG00000149532	11:61413548:61413548:-1	11	61413548	-1	26.087	26	intron (3)	18181.2	0.0758131	0.10205	0.742901	0.457542	0.66167	12826	0.131654	0.167991	0.783692	0.433221	0.735681
ENSG00000149532	11:61413555:61413555:-1	11	61413555	-1	28	26	intron (3)	18181.2	0.0758131	0.10205	0.742901	0.457542	0.66167	12826	0.131654	0.167991	0.783692	0.433221	0.735681
ENSG00000167985	11:61441440:61441440:1	11	61441440	1	31.5789	8	intron (1)	994.816	-0.0556673	0.126955	-0.43848	0.661039	0.811775	1871.24	0.207381	0.197008	1.05265	0.2925	0.625059
ENSG00000167985	11:61441441:61441441:1	11	61441441	1	25	8	intron (1)	994.816	-0.0556673	0.126955	-0.43848	0.661039	0.811775	1871.24	0.207381	0.197008	1.05265	0.2925	0.625059
intergenic	11:61798233:61798233:-1	11	61798233	-1	10.8108	NA	0	NA	NA	NA	NA	NA	NA	NA	NA	NA	NA	NA	NA
intergenic	11:61798234:61798234:-1	11	61798234	-1	13.5135	NA	0	NA	NA	NA	NA	NA	NA	NA	NA	NA	NA	NA	NA
intergenic	11:61798268:61798268:-1	11	61798268	-1	11.1111	NA	0	NA	NA	NA	NA	NA	NA	NA	NA	NA	NA	NA	NA
intergenic	11:61798303:61798303:-1	11	61798303	-1	10.5263	NA	0	NA	NA	NA	NA	NA	NA	NA	NA	NA	NA	NA	NA
intergenic	11:61798898:61798898:-1	11	61798898	-1	44.4444	NA	0	NA	NA	NA	NA	NA	NA	NA	NA	NA	NA	NA	NA
intergenic	11:61798989:61798989:-1	11	61798989	-1	21.9512	NA	0	NA	NA	NA	NA	NA	NA	NA	NA	NA	NA	NA	NA
intergenic	11:61799027:61799027:-1	11	61799027	-1	16.6667	NA	0	NA	NA	NA	NA	NA	NA	NA	NA	NA	NA	NA	NA
intergenic	11:61799028:61799028:-1	11	61799028	-1	39.3939	NA	0	NA	NA	NA	NA	NA	NA	NA	NA	NA	NA	NA	NA
intergenic	11:61799031:61799031:-1	11	61799031	-1	57.1429	NA	0	NA	NA	NA	NA	NA	NA	NA	NA	NA	NA	NA	NA
intergenic	11:61799062:61799062:-1	11	61799062	-1	21.0526	NA	0	NA	NA	NA	NA	NA	NA	NA	NA	NA	NA	NA	NA
intergenic	11:61799067:61799067:-1	11	61799067	-1	47.0588	NA	0	NA	NA	NA	NA	NA	NA	NA	NA	NA	NA	NA	NA
intergenic	11:61799255:61799255:-1	11	61799255	-1	61.9048	NA	0	NA	NA	NA	NA	NA	NA	NA	NA	NA	NA	NA	NA
ENSG00000149485	11:61800254:61800254:-1	11	61800254	-1	4.32099	21	3'UTR (1)	47927	0.643846	0.129306	4.97923	6.38381e-07	1.06975e-05	45805.5	-0.0494624	0.186498	-0.265217	0.790842	0.925161
ENSG00000149485	11:61800326:61800326:-1	11	61800326	-1	3.65854	21	3'UTR (1)	47927	0.643846	0.129306	4.97923	6.38381e-07	1.06975e-05	45805.5	-0.0494624	0.186498	-0.265217	0.790842	0.925161
ENSG00000149485	11:61814786:61814786:-1	11	61814786	-1	19.0476	21	intron (1)	47927	0.643846	0.129306	4.97923	6.38381e-07	1.06975e-05	45805.5	-0.0494624	0.186498	-0.265217	0.790842	0.925161
ENSG00000149485	11:61814818:61814818:-1	11	61814818	-1	66.6667	21	intron (1)	47927	0.643846	0.129306	4.97923	6.38381e-07	1.06975e-05	45805.5	-0.0494624	0.186498	-0.265217	0.790842	0.925161
ENSG00000149485	11:61814828:61814828:-1	11	61814828	-1	31.5789	21	intron (1)	47927	0.643846	0.129306	4.97923	6.38381e-07	1.06975e-05	45805.5	-0.0494624	0.186498	-0.265217	0.790842	0.925161
ENSG00000134824	11:61849774:61849774:1	11	61849774	1	26.5306	15	intron (3)	102412	0.786713	0.12399	6.34498	2.22461e-10	7.08098e-09	56596.6	-0.151313	0.138997	-1.08861	0.276327	0.608271
ENSG00000134824	11:61849775:61849775:1	11	61849775	1	10.6383	15	intron (3)	102412	0.786713	0.12399	6.34498	2.22461e-10	7.08098e-09	56596.6	-0.151313	0.138997	-1.08861	0.276327	0.608271
ENSG00000134824	11:61849974:61849974:1	11	61849974	1	55.2632	15	intron (3)	102412	0.786713	0.12399	6.34498	2.22461e-10	7.08098e-09	56596.6	-0.151313	0.138997	-1.08861	0.276327	0.608271
ENSG00000134824	11:61849977:61849977:1	11	61849977	1	18.9189	15	intron (3)	102412	0.786713	0.12399	6.34498	2.22461e-10	7.08098e-09	56596.6	-0.151313	0.138997	-1.08861	0.276327	0.608271
ENSG00000134824	11:61850344:61850344:1	11	61850344	1	15.625	15	intron (3)	102412	0.786713	0.12399	6.34498	2.22461e-10	7.08098e-09	56596.6	-0.151313	0.138997	-1.08861	0.276327	0.608271
ENSG00000134824	11:61850351:61850351:1	11	61850351	1	16.6667	15	intron (3)	102412	0.786713	0.12399	6.34498	2.22461e-10	7.08098e-09	56596.6	-0.151313	0.138997	-1.08861	0.276327	0.608271
ENSG00000134824	11:61850392:61850392:1	11	61850392	1	21.4286	15	intron (3)	102412	0.786713	0.12399	6.34498	2.22461e-10	7.08098e-09	56596.6	-0.151313	0.138997	-1.08861	0.276327	0.608271
ENSG00000134824	11:61850451:61850451:1	11	61850451	1	50	15	intron (3)	102412	0.786713	0.12399	6.34498	2.22461e-10	7.08098e-09	56596.6	-0.151313	0.138997	-1.08861	0.276327	0.608271
ENSG00000134824	11:61850523:61850523:1	11	61850523	1	16.129	15	intron (3)	102412	0.786713	0.12399	6.34498	2.22461e-10	7.08098e-09	56596.6	-0.151313	0.138997	-1.08861	0.276327	0.608271
ENSG00000134824	11:61859715:61859715:1	11	61859715	1	17.1429	15	intron (3)	102412	0.786713	0.12399	6.34498	2.22461e-10	7.08098e-09	56596.6	-0.151313	0.138997	-1.08861	0.276327	0.608271
ENSG00000089597	11:62641659:62641659:-1	11	62641659	-1	31.8182	17	intron (5)	62222.6	0.296341	0.104655	2.83159	0.00463166	0.0235885	18492.5	-0.152742	0.143242	-1.06632	0.286281	0.61808
ENSG00000089597	11:62641678:62641678:-1	11	62641678	-1	21.0526	17	intron (5)	62222.6	0.296341	0.104655	2.83159	0.00463166	0.0235885	18492.5	-0.152742	0.143242	-1.06632	0.286281	0.61808
ENSG00000089597	11:62642305:62642305:-1	11	62642305	-1	12.9032	17	intron (5)	62222.6	0.296341	0.104655	2.83159	0.00463166	0.0235885	18492.5	-0.152742	0.143242	-1.06632	0.286281	0.61808
ENSG00000089597	11:62642306:62642306:-1	11	62642306	-1	30	17	intron (5)	62222.6	0.296341	0.104655	2.83159	0.00463166	0.0235885	18492.5	-0.152742	0.143242	-1.06632	0.286281	0.61808
ENSG00000089597	11:62642629:62642629:-1	11	62642629	-1	25	17	intron (5)	62222.6	0.296341	0.104655	2.83159	0.00463166	0.0235885	18492.5	-0.152742	0.143242	-1.06632	0.286281	0.61808
ENSG00000089597	11:62643732:62643732:-1	11	62643732	-1	16.6667	17	intron (5)	62222.6	0.296341	0.104655	2.83159	0.00463166	0.0235885	18492.5	-0.152742	0.143242	-1.06632	0.286281	0.61808
ENSG00000162222	11:62738890:62738890:1	11	62738890	1	18.75	6	downstream (1), intron (1)	1028.14	0.262148	0.118932	2.20418	0.0275114	0.0953702	1078.46	0.354537	0.224716	1.57771	0.114631	0.412711
ENSG00000162222	11:62739028:62739028:1	11	62739028	1	12.1951	6	downstream (1), intron (1)	1028.14	0.262148	0.118932	2.20418	0.0275114	0.0953702	1078.46	0.354537	0.224716	1.57771	0.114631	0.412711
ENSG00000162222	11:62739205:62739205:1	11	62739205	1	20	6	downstream (1), intron (1)	1028.14	0.262148	0.118932	2.20418	0.0275114	0.0953702	1078.46	0.354537	0.224716	1.57771	0.114631	0.412711
ENSG00000162222	11:62739518:62739518:1	11	62739518	1	47.9167	6	downstream (1), intron (1)	1028.14	0.262148	0.118932	2.20418	0.0275114	0.0953702	1078.46	0.354537	0.224716	1.57771	0.114631	0.412711
ENSG00000162222	11:62739644:62739644:1	11	62739644	1	25.8065	6	downstream (1), intron (1)	1028.14	0.262148	0.118932	2.20418	0.0275114	0.0953702	1078.46	0.354537	0.224716	1.57771	0.114631	0.412711
ENSG00000162222	11:62739723:62739723:1	11	62739723	1	10.2564	6	downstream (1), intron (1)	1028.14	0.262148	0.118932	2.20418	0.0275114	0.0953702	1078.46	0.354537	0.224716	1.57771	0.114631	0.412711
ENSG00000162222	11:62739748:62739748:1	11	62739748	1	16.129	6	downstream (1), intron (1)	1028.14	0.262148	0.118932	2.20418	0.0275114	0.0953702	1078.46	0.354537	0.224716	1.57771	0.114631	0.412711
ENSG00000162222	11:62739768:62739768:1	11	62739768	1	12.9032	6	downstream (1), intron (1)	1028.14	0.262148	0.118932	2.20418	0.0275114	0.0953702	1078.46	0.354537	0.224716	1.57771	0.114631	0.412711
ENSG00000162222	11:62739810:62739810:1	11	62739810	1	25	6	downstream (1), intron (1)	1028.14	0.262148	0.118932	2.20418	0.0275114	0.0953702	1078.46	0.354537	0.224716	1.57771	0.114631	0.412711
ENSG00000162222	11:62739891:62739891:1	11	62739891	1	20	6	downstream (1), intron (1)	1028.14	0.262148	0.118932	2.20418	0.0275114	0.0953702	1078.46	0.354537	0.224716	1.57771	0.114631	0.412711
ENSG00000168002	11:62764649:62764649:1	11	62764649	1	23.0769	8	intron (1)	4237.57	0.254395	0.106914	2.37943	0.0173394	0.0673127	5956.26	0.309091	0.179649	1.72052	0.0853374	0.354261
ENSG00000168002	11:62764759:62764759:1	11	62764759	1	28.5714	8	intron (1)	4237.57	0.254395	0.106914	2.37943	0.0173394	0.0673127	5956.26	0.309091	0.179649	1.72052	0.0853374	0.354261
ENSG00000162236	11:62823719:62823719:-1	11	62823719	-1	50	8	intron (3)	1959.61	0.238706	0.112559	2.12073	0.0339447	0.111326	2155.94	0.290146	0.159881	1.81476	0.0695602	0.322184
ENSG00000162236	11:62823729:62823729:-1	11	62823729	-1	22.2222	8	intron (3)	1959.61	0.238706	0.112559	2.12073	0.0339447	0.111326	2155.94	0.290146	0.159881	1.81476	0.0695602	0.322184
ENSG00000168003	11:62887934:62887934:1	11	62887934	1	22.7273	23	intron (5)	10422.3	0.546284	0.11323	4.82453	1.40332e-06	2.18419e-05	6929.42	0.114697	0.201226	0.569993	0.568682	0.819841
intergenic	11:63569600:63569600:-1	11	63569600	-1	26.6667	NA	0	NA	NA	NA	NA	NA	NA	NA	NA	NA	NA	NA	NA
intergenic	11:63569603:63569603:-1	11	63569603	-1	17.8571	NA	0	NA	NA	NA	NA	NA	NA	NA	NA	NA	NA	NA	NA
intergenic	11:63571507:63571507:-1	11	63571507	-1	8.19672	NA	0	NA	NA	NA	NA	NA	NA	NA	NA	NA	NA	NA	NA
intergenic	11:63571729:63571729:-1	11	63571729	-1	27.5	NA	0	NA	NA	NA	NA	NA	NA	NA	NA	NA	NA	NA	NA
intergenic	11:63573127:63573127:-1	11	63573127	-1	21.6216	NA	0	NA	NA	NA	NA	NA	NA	NA	NA	NA	NA	NA	NA
ENSG00000168005	11:63821878:63821878:1	11	63821878	1	13.7931	3	intron (1)	1396.26	-0.109641	0.157487	-0.696187	0.486312	0.685307	1802.53	0.62954	0.213866	2.94362	0.00324401	0.0536212
ENSG00000168005	11:63822101:63822101:1	11	63822101	1	91.3043	3	intron (1)	1396.26	-0.109641	0.157487	-0.696187	0.486312	0.685307	1802.53	0.62954	0.213866	2.94362	0.00324401	0.0536212
ENSG00000168005	11:63822118:63822118:1	11	63822118	1	26.9231	3	intron (1)	1396.26	-0.109641	0.157487	-0.696187	0.486312	0.685307	1802.53	0.62954	0.213866	2.94362	0.00324401	0.0536212
ENSG00000168005	11:63822128:63822128:1	11	63822128	1	26.9231	3	intron (1)	1396.26	-0.109641	0.157487	-0.696187	0.486312	0.685307	1802.53	0.62954	0.213866	2.94362	0.00324401	0.0536212
ENSG00000168005	11:63822196:63822196:1	11	63822196	1	36.8421	3	intron (1)	1396.26	-0.109641	0.157487	-0.696187	0.486312	0.685307	1802.53	0.62954	0.213866	2.94362	0.00324401	0.0536212
ENSG00000173153	11:64307992:64307992:1	11	64307992	1	18.1818	7	intron (3)	1133.1	0.24769	0.171223	1.44659	0.148011	0.324544	1457.62	0.27069	0.221114	1.22421	0.220874	0.555291
ENSG00000173153	11:64308127:64308127:1	11	64308127	1	41.9355	7	intron (3)	1133.1	0.24769	0.171223	1.44659	0.148011	0.324544	1457.62	0.27069	0.221114	1.22421	0.220874	0.555291
ENSG00000179532	11:6540261:6540261:1	11	6540261	1	44.4444	20	downstream (1), intron (1)	2386.62	0.178604	0.151491	1.17898	0.238407	0.443941	745.274	-0.154376	0.25444	-0.606726	0.544032	0.803361
intergenic	11:65772882:65772882:-1	11	65772882	-1	31.8182	NA	0	NA	NA	NA	NA	NA	NA	NA	NA	NA	NA	NA	NA
intergenic	11:65772932:65772932:-1	11	65772932	-1	48.1481	NA	0	NA	NA	NA	NA	NA	NA	NA	NA	NA	NA	NA	NA
intergenic	11:65772933:65772933:-1	11	65772933	-1	53.5714	NA	0	NA	NA	NA	NA	NA	NA	NA	NA	NA	NA	NA	NA
ENSG00000254470	11:65776163:65776163:-1	11	65776163	-1	15.1515	1	3'UTR (1)	1067.24	0.177992	0.162567	1.09488	0.273568	0.485351	609.451	-0.0745677	0.231401	-0.322245	0.747267	0.905385
ENSG00000254470	11:65776871:65776871:-1	11	65776871	-1	10.2564	1	3'UTR (1)	1067.24	0.177992	0.162567	1.09488	0.273568	0.485351	609.451	-0.0745677	0.231401	-0.322245	0.747267	0.905385
ENSG00000254470	11:65776910:65776910:-1	11	65776910	-1	18.9655	1	3'UTR (1)	1067.24	0.177992	0.162567	1.09488	0.273568	0.485351	609.451	-0.0745677	0.231401	-0.322245	0.747267	0.905385
ENSG00000254470	11:65776911:65776911:-1	11	65776911	-1	23.6364	1	3'UTR (1)	1067.24	0.177992	0.162567	1.09488	0.273568	0.485351	609.451	-0.0745677	0.231401	-0.322245	0.747267	0.905385
ENSG00000254470	11:65776912:65776912:-1	11	65776912	-1	9.61538	1	3'UTR (1)	1067.24	0.177992	0.162567	1.09488	0.273568	0.485351	609.451	-0.0745677	0.231401	-0.322245	0.747267	0.905385
ENSG00000254470	11:65777052:65777052:-1	11	65777052	-1	13.3333	1	3'UTR (1)	1067.24	0.177992	0.162567	1.09488	0.273568	0.485351	609.451	-0.0745677	0.231401	-0.322245	0.747267	0.905385
ENSG00000254470	11:65777096:65777096:-1	11	65777096	-1	30	1	3'UTR (1)	1067.24	0.177992	0.162567	1.09488	0.273568	0.485351	609.451	-0.0745677	0.231401	-0.322245	0.747267	0.905385
ENSG00000175115	11:66222005:66222005:1	11	66222005	1	20	15	intron (1)	10875.5	0.0467943	0.142725	0.327863	0.743015	0.864299	11010.7	0.136764	0.29994	0.455972	0.64841	0.861331
intergenic	11:66248537:66248537:1	11	66248537	1	48	NA	0	NA	NA	NA	NA	NA	NA	NA	NA	NA	NA	NA	NA
intergenic	11:66248538:66248538:1	11	66248538	1	24	NA	0	NA	NA	NA	NA	NA	NA	NA	NA	NA	NA	NA	NA
intergenic	11:66248845:66248845:1	11	66248845	1	51.7241	NA	0	NA	NA	NA	NA	NA	NA	NA	NA	NA	NA	NA	NA
intergenic	11:66251306:66251306:1	11	66251306	1	23.8095	NA	0	NA	NA	NA	NA	NA	NA	NA	NA	NA	NA	NA	NA
intergenic	11:66251327:66251327:1	11	66251327	1	33.3333	NA	0	NA	NA	NA	NA	NA	NA	NA	NA	NA	NA	NA	NA
intergenic	11:66251330:66251330:1	11	66251330	1	27.2727	NA	0	NA	NA	NA	NA	NA	NA	NA	NA	NA	NA	NA	NA
ENSG00000174996	11:66260661:66260661:1	11	66260661	1	33.3333	14	intron (4)	4039.78	0.0281352	0.144624	0.19454	0.845753	0.924847	3345.13	0.169671	0.214901	0.789534	0.4298	0.733954
ENSG00000174996	11:66260671:66260671:1	11	66260671	1	26.6667	14	intron (4)	4039.78	0.0281352	0.144624	0.19454	0.845753	0.924847	3345.13	0.169671	0.214901	0.789534	0.4298	0.733954
ENSG00000174996	11:66260697:66260697:1	11	66260697	1	33.3333	14	intron (4)	4039.78	0.0281352	0.144624	0.19454	0.845753	0.924847	3345.13	0.169671	0.214901	0.789534	0.4298	0.733954
ENSG00000174996	11:66260863:66260863:1	11	66260863	1	34.7826	14	intron (4)	4039.78	0.0281352	0.144624	0.19454	0.845753	0.924847	3345.13	0.169671	0.214901	0.789534	0.4298	0.733954
ENSG00000255468	11:66352001:66352001:1	11	66352001	1	15.625	4	intron (1)	2222.4	0.241596	0.112789	2.14202	0.0321916	0.106855	3485.19	0.301876	0.129252	2.33556	0.0195144	0.160799
ENSG00000255468	11:66352030:66352030:1	11	66352030	1	11.7647	4	intron (1)	2222.4	0.241596	0.112789	2.14202	0.0321916	0.106855	3485.19	0.301876	0.129252	2.33556	0.0195144	0.160799
ENSG00000255468	11:66353477:66353477:1	11	66353477	1	13.0841	4	intron (1)	2222.4	0.241596	0.112789	2.14202	0.0321916	0.106855	3485.19	0.301876	0.129252	2.33556	0.0195144	0.160799
ENSG00000255468	11:66353491:66353491:1	11	66353491	1	5.49451	4	intron (1)	2222.4	0.241596	0.112789	2.14202	0.0321916	0.106855	3485.19	0.301876	0.129252	2.33556	0.0195144	0.160799
ENSG00000255468	11:66353515:66353515:1	11	66353515	1	11.7647	4	intron (1)	2222.4	0.241596	0.112789	2.14202	0.0321916	0.106855	3485.19	0.301876	0.129252	2.33556	0.0195144	0.160799
ENSG00000255468	11:66353518:66353518:1	11	66353518	1	11.3636	4	intron (1)	2222.4	0.241596	0.112789	2.14202	0.0321916	0.106855	3485.19	0.301876	0.129252	2.33556	0.0195144	0.160799
ENSG00000255468	11:66353956:66353956:1	11	66353956	1	6.41026	4	intron (1)	2222.4	0.241596	0.112789	2.14202	0.0321916	0.106855	3485.19	0.301876	0.129252	2.33556	0.0195144	0.160799
ENSG00000255468	11:66353978:66353978:1	11	66353978	1	13.3333	4	intron (1)	2222.4	0.241596	0.112789	2.14202	0.0321916	0.106855	3485.19	0.301876	0.129252	2.33556	0.0195144	0.160799
ENSG00000255468	11:66353983:66353983:1	11	66353983	1	8.33333	4	intron (1)	2222.4	0.241596	0.112789	2.14202	0.0321916	0.106855	3485.19	0.301876	0.129252	2.33556	0.0195144	0.160799
ENSG00000255468	11:66353986:66353986:1	11	66353986	1	7.46269	4	intron (1)	2222.4	0.241596	0.112789	2.14202	0.0321916	0.106855	3485.19	0.301876	0.129252	2.33556	0.0195144	0.160799
ENSG00000255468	11:66354050:66354050:1	11	66354050	1	25.7576	4	intron (1)	2222.4	0.241596	0.112789	2.14202	0.0321916	0.106855	3485.19	0.301876	0.129252	2.33556	0.0195144	0.160799
ENSG00000255468	11:66354056:66354056:1	11	66354056	1	18.8406	4	intron (1)	2222.4	0.241596	0.112789	2.14202	0.0321916	0.106855	3485.19	0.301876	0.129252	2.33556	0.0195144	0.160799
ENSG00000255468	11:66354092:66354092:1	11	66354092	1	8.4507	4	intron (1)	2222.4	0.241596	0.112789	2.14202	0.0321916	0.106855	3485.19	0.301876	0.129252	2.33556	0.0195144	0.160799
ENSG00000255468	11:66354120:66354120:1	11	66354120	1	30.3571	4	intron (1)	2222.4	0.241596	0.112789	2.14202	0.0321916	0.106855	3485.19	0.301876	0.129252	2.33556	0.0195144	0.160799
ENSG00000255468	11:66354147:66354147:1	11	66354147	1	11.1111	4	intron (1)	2222.4	0.241596	0.112789	2.14202	0.0321916	0.106855	3485.19	0.301876	0.129252	2.33556	0.0195144	0.160799
ENSG00000255468	11:66354864:66354864:1	11	66354864	1	20.6897	4	intron (1)	2222.4	0.241596	0.112789	2.14202	0.0321916	0.106855	3485.19	0.301876	0.129252	2.33556	0.0195144	0.160799
ENSG00000255468	11:66354902:66354902:1	11	66354902	1	10.2564	4	intron (1)	2222.4	0.241596	0.112789	2.14202	0.0321916	0.106855	3485.19	0.301876	0.129252	2.33556	0.0195144	0.160799
ENSG00000255468	11:66354909:66354909:1	11	66354909	1	32.2581	4	intron (1)	2222.4	0.241596	0.112789	2.14202	0.0321916	0.106855	3485.19	0.301876	0.129252	2.33556	0.0195144	0.160799
ENSG00000255468	11:66354935:66354935:1	11	66354935	1	13.0435	4	intron (1)	2222.4	0.241596	0.112789	2.14202	0.0321916	0.106855	3485.19	0.301876	0.129252	2.33556	0.0195144	0.160799
ENSG00000255468	11:66355314:66355314:1	11	66355314	1	16.6667	4	intron (1)	2222.4	0.241596	0.112789	2.14202	0.0321916	0.106855	3485.19	0.301876	0.129252	2.33556	0.0195144	0.160799
ENSG00000255468	11:66355949:66355949:1	11	66355949	1	17.0732	4	intron (1)	2222.4	0.241596	0.112789	2.14202	0.0321916	0.106855	3485.19	0.301876	0.129252	2.33556	0.0195144	0.160799
ENSG00000255468	11:66355950:66355950:1	11	66355950	1	26.1905	4	intron (1)	2222.4	0.241596	0.112789	2.14202	0.0321916	0.106855	3485.19	0.301876	0.129252	2.33556	0.0195144	0.160799
ENSG00000255468	11:66355967:66355967:1	11	66355967	1	19.6078	4	intron (1)	2222.4	0.241596	0.112789	2.14202	0.0321916	0.106855	3485.19	0.301876	0.129252	2.33556	0.0195144	0.160799
ENSG00000255468	11:66356011:66356011:1	11	66356011	1	8.95522	4	intron (1)	2222.4	0.241596	0.112789	2.14202	0.0321916	0.106855	3485.19	0.301876	0.129252	2.33556	0.0195144	0.160799
ENSG00000255468	11:66356033:66356033:1	11	66356033	1	32.3944	4	intron (1)	2222.4	0.241596	0.112789	2.14202	0.0321916	0.106855	3485.19	0.301876	0.129252	2.33556	0.0195144	0.160799
ENSG00000255468	11:66356035:66356035:1	11	66356035	1	9.58904	4	intron (1)	2222.4	0.241596	0.112789	2.14202	0.0321916	0.106855	3485.19	0.301876	0.129252	2.33556	0.0195144	0.160799
ENSG00000255468	11:66356042:66356042:1	11	66356042	1	9.83607	4	intron (1)	2222.4	0.241596	0.112789	2.14202	0.0321916	0.106855	3485.19	0.301876	0.129252	2.33556	0.0195144	0.160799
ENSG00000255468	11:66356122:66356122:1	11	66356122	1	25	4	intron (1)	2222.4	0.241596	0.112789	2.14202	0.0321916	0.106855	3485.19	0.301876	0.129252	2.33556	0.0195144	0.160799
ENSG00000255468	11:66356125:66356125:1	11	66356125	1	19.6078	4	intron (1)	2222.4	0.241596	0.112789	2.14202	0.0321916	0.106855	3485.19	0.301876	0.129252	2.33556	0.0195144	0.160799
ENSG00000255468	11:66356660:66356660:1	11	66356660	1	21.7391	4	intron (1)	2222.4	0.241596	0.112789	2.14202	0.0321916	0.106855	3485.19	0.301876	0.129252	2.33556	0.0195144	0.160799
ENSG00000255468	11:66356693:66356693:1	11	66356693	1	10.4167	4	intron (1)	2222.4	0.241596	0.112789	2.14202	0.0321916	0.106855	3485.19	0.301876	0.129252	2.33556	0.0195144	0.160799
ENSG00000255468	11:66356749:66356749:1	11	66356749	1	14	4	intron (1)	2222.4	0.241596	0.112789	2.14202	0.0321916	0.106855	3485.19	0.301876	0.129252	2.33556	0.0195144	0.160799
ENSG00000255468	11:66356860:66356860:1	11	66356860	1	13.3333	4	intron (1)	2222.4	0.241596	0.112789	2.14202	0.0321916	0.106855	3485.19	0.301876	0.129252	2.33556	0.0195144	0.160799
ENSG00000255468	11:66356873:66356873:1	11	66356873	1	18.1818	4	intron (1)	2222.4	0.241596	0.112789	2.14202	0.0321916	0.106855	3485.19	0.301876	0.129252	2.33556	0.0195144	0.160799
ENSG00000255468	11:66356877:66356877:1	11	66356877	1	18.1818	4	intron (1)	2222.4	0.241596	0.112789	2.14202	0.0321916	0.106855	3485.19	0.301876	0.129252	2.33556	0.0195144	0.160799
ENSG00000255468	11:66356878:66356878:1	11	66356878	1	17.1429	4	intron (1)	2222.4	0.241596	0.112789	2.14202	0.0321916	0.106855	3485.19	0.301876	0.129252	2.33556	0.0195144	0.160799
ENSG00000255468	11:66357123:66357123:1	11	66357123	1	16.9492	4	intron (1)	2222.4	0.241596	0.112789	2.14202	0.0321916	0.106855	3485.19	0.301876	0.129252	2.33556	0.0195144	0.160799
ENSG00000255468	11:66357602:66357602:1	11	66357602	1	20	4	intron (1)	2222.4	0.241596	0.112789	2.14202	0.0321916	0.106855	3485.19	0.301876	0.129252	2.33556	0.0195144	0.160799
ENSG00000255468	11:66357606:66357606:1	11	66357606	1	64.5161	4	intron (1)	2222.4	0.241596	0.112789	2.14202	0.0321916	0.106855	3485.19	0.301876	0.129252	2.33556	0.0195144	0.160799
ENSG00000255468	11:66357642:66357642:1	11	66357642	1	25.7143	4	intron (1)	2222.4	0.241596	0.112789	2.14202	0.0321916	0.106855	3485.19	0.301876	0.129252	2.33556	0.0195144	0.160799
ENSG00000255468	11:66357651:66357651:1	11	66357651	1	18.1818	4	intron (1)	2222.4	0.241596	0.112789	2.14202	0.0321916	0.106855	3485.19	0.301876	0.129252	2.33556	0.0195144	0.160799
ENSG00000255468	11:66357894:66357894:1	11	66357894	1	21.7391	4	intron (1)	2222.4	0.241596	0.112789	2.14202	0.0321916	0.106855	3485.19	0.301876	0.129252	2.33556	0.0195144	0.160799
ENSG00000255468	11:66357922:66357922:1	11	66357922	1	12.5	4	intron (1)	2222.4	0.241596	0.112789	2.14202	0.0321916	0.106855	3485.19	0.301876	0.129252	2.33556	0.0195144	0.160799
ENSG00000255468	11:66357963:66357963:1	11	66357963	1	31.9149	4	intron (1)	2222.4	0.241596	0.112789	2.14202	0.0321916	0.106855	3485.19	0.301876	0.129252	2.33556	0.0195144	0.160799
ENSG00000255468	11:66357967:66357967:1	11	66357967	1	10.6383	4	intron (1)	2222.4	0.241596	0.112789	2.14202	0.0321916	0.106855	3485.19	0.301876	0.129252	2.33556	0.0195144	0.160799
ENSG00000255468	11:66357975:66357975:1	11	66357975	1	40	4	intron (1)	2222.4	0.241596	0.112789	2.14202	0.0321916	0.106855	3485.19	0.301876	0.129252	2.33556	0.0195144	0.160799
ENSG00000255468	11:66357998:66357998:1	11	66357998	1	27.0833	4	intron (1)	2222.4	0.241596	0.112789	2.14202	0.0321916	0.106855	3485.19	0.301876	0.129252	2.33556	0.0195144	0.160799
ENSG00000255468	11:66357999:66357999:1	11	66357999	1	68	4	intron (1)	2222.4	0.241596	0.112789	2.14202	0.0321916	0.106855	3485.19	0.301876	0.129252	2.33556	0.0195144	0.160799
ENSG00000255468	11:66358281:66358281:1	11	66358281	1	6.66667	4	intron (1)	2222.4	0.241596	0.112789	2.14202	0.0321916	0.106855	3485.19	0.301876	0.129252	2.33556	0.0195144	0.160799
ENSG00000255468	11:66358305:66358305:1	11	66358305	1	13.4328	4	intron (1)	2222.4	0.241596	0.112789	2.14202	0.0321916	0.106855	3485.19	0.301876	0.129252	2.33556	0.0195144	0.160799
ENSG00000255468	11:66358309:66358309:1	11	66358309	1	7.35294	4	intron (1)	2222.4	0.241596	0.112789	2.14202	0.0321916	0.106855	3485.19	0.301876	0.129252	2.33556	0.0195144	0.160799
ENSG00000255468	11:66358313:66358313:1	11	66358313	1	32.8125	4	intron (1)	2222.4	0.241596	0.112789	2.14202	0.0321916	0.106855	3485.19	0.301876	0.129252	2.33556	0.0195144	0.160799
ENSG00000255468	11:66358314:66358314:1	11	66358314	1	38.4615	4	intron (1)	2222.4	0.241596	0.112789	2.14202	0.0321916	0.106855	3485.19	0.301876	0.129252	2.33556	0.0195144	0.160799
intergenic	11:66358392:66358392:-1	11	66358392	-1	17.3913	NA	0	NA	NA	NA	NA	NA	NA	NA	NA	NA	NA	NA	NA
ENSG00000255468	11:66358402:66358402:1	11	66358402	1	12.766	4	intron (1)	2222.4	0.241596	0.112789	2.14202	0.0321916	0.106855	3485.19	0.301876	0.129252	2.33556	0.0195144	0.160799
ENSG00000255468	11:66358427:66358427:1	11	66358427	1	45.6522	4	intron (1)	2222.4	0.241596	0.112789	2.14202	0.0321916	0.106855	3485.19	0.301876	0.129252	2.33556	0.0195144	0.160799
intergenic	11:66358443:66358443:-1	11	66358443	-1	16.6667	NA	0	NA	NA	NA	NA	NA	NA	NA	NA	NA	NA	NA	NA
ENSG00000255468	11:66358454:66358454:1	11	66358454	1	17.3077	4	intron (1)	2222.4	0.241596	0.112789	2.14202	0.0321916	0.106855	3485.19	0.301876	0.129252	2.33556	0.0195144	0.160799
ENSG00000255468	11:66359270:66359270:1	11	66359270	1	27.7778	4	intron (1)	2222.4	0.241596	0.112789	2.14202	0.0321916	0.106855	3485.19	0.301876	0.129252	2.33556	0.0195144	0.160799
ENSG00000255468	11:66359271:66359271:1	11	66359271	1	17.1429	4	intron (1)	2222.4	0.241596	0.112789	2.14202	0.0321916	0.106855	3485.19	0.301876	0.129252	2.33556	0.0195144	0.160799
ENSG00000255468	11:66359293:66359293:1	11	66359293	1	69.5652	4	intron (1)	2222.4	0.241596	0.112789	2.14202	0.0321916	0.106855	3485.19	0.301876	0.129252	2.33556	0.0195144	0.160799
ENSG00000255468	11:66359397:66359397:1	11	66359397	1	11.3208	4	intron (1)	2222.4	0.241596	0.112789	2.14202	0.0321916	0.106855	3485.19	0.301876	0.129252	2.33556	0.0195144	0.160799
ENSG00000255468	11:66359401:66359401:1	11	66359401	1	12.5	4	intron (1)	2222.4	0.241596	0.112789	2.14202	0.0321916	0.106855	3485.19	0.301876	0.129252	2.33556	0.0195144	0.160799
intergenic	11:66359406:66359406:-1	11	66359406	-1	52.381	NA	0	NA	NA	NA	NA	NA	NA	NA	NA	NA	NA	NA	NA
ENSG00000255468	11:66359407:66359407:1	11	66359407	1	47.1698	4	intron (1)	2222.4	0.241596	0.112789	2.14202	0.0321916	0.106855	3485.19	0.301876	0.129252	2.33556	0.0195144	0.160799
ENSG00000255468	11:66359413:66359413:1	11	66359413	1	11.5385	4	intron (1)	2222.4	0.241596	0.112789	2.14202	0.0321916	0.106855	3485.19	0.301876	0.129252	2.33556	0.0195144	0.160799
ENSG00000255468	11:66359447:66359447:1	11	66359447	1	47.2727	4	intron (1)	2222.4	0.241596	0.112789	2.14202	0.0321916	0.106855	3485.19	0.301876	0.129252	2.33556	0.0195144	0.160799
ENSG00000255468	11:66359463:66359463:1	11	66359463	1	9.80392	4	intron (1)	2222.4	0.241596	0.112789	2.14202	0.0321916	0.106855	3485.19	0.301876	0.129252	2.33556	0.0195144	0.160799
ENSG00000255468	11:66359479:66359479:1	11	66359479	1	65.9574	4	intron (1)	2222.4	0.241596	0.112789	2.14202	0.0321916	0.106855	3485.19	0.301876	0.129252	2.33556	0.0195144	0.160799
ENSG00000255468	11:66360144:66360144:1	11	66360144	1	47.0588	4	intron (1)	2222.4	0.241596	0.112789	2.14202	0.0321916	0.106855	3485.19	0.301876	0.129252	2.33556	0.0195144	0.160799
ENSG00000255468	11:66360155:66360155:1	11	66360155	1	17.1429	4	intron (1)	2222.4	0.241596	0.112789	2.14202	0.0321916	0.106855	3485.19	0.301876	0.129252	2.33556	0.0195144	0.160799
ENSG00000255468	11:66360206:66360206:1	11	66360206	1	10.2564	4	intron (1)	2222.4	0.241596	0.112789	2.14202	0.0321916	0.106855	3485.19	0.301876	0.129252	2.33556	0.0195144	0.160799
ENSG00000255468	11:66360263:66360263:1	11	66360263	1	12.1951	4	intron (1)	2222.4	0.241596	0.112789	2.14202	0.0321916	0.106855	3485.19	0.301876	0.129252	2.33556	0.0195144	0.160799
ENSG00000255468	11:66360266:66360266:1	11	66360266	1	51.2195	4	intron (1)	2222.4	0.241596	0.112789	2.14202	0.0321916	0.106855	3485.19	0.301876	0.129252	2.33556	0.0195144	0.160799
ENSG00000255468	11:66360273:66360273:1	11	66360273	1	13.5135	4	intron (1)	2222.4	0.241596	0.112789	2.14202	0.0321916	0.106855	3485.19	0.301876	0.129252	2.33556	0.0195144	0.160799
ENSG00000255468	11:66360305:66360305:1	11	66360305	1	25	4	intron (1)	2222.4	0.241596	0.112789	2.14202	0.0321916	0.106855	3485.19	0.301876	0.129252	2.33556	0.0195144	0.160799
ENSG00000255468	11:66364759:66364759:1	11	66364759	1	11.6667	4	downstream (1)	2222.4	0.241596	0.112789	2.14202	0.0321916	0.106855	3485.19	0.301876	0.129252	2.33556	0.0195144	0.160799
ENSG00000255468	11:66364781:66364781:1	11	66364781	1	7.57576	4	downstream (1)	2222.4	0.241596	0.112789	2.14202	0.0321916	0.106855	3485.19	0.301876	0.129252	2.33556	0.0195144	0.160799
intergenic	11:66364872:66364872:1	11	66364872	1	6.17284	NA	0	NA	NA	NA	NA	NA	NA	NA	NA	NA	NA	NA	NA
intergenic	11:66365179:66365179:1	11	66365179	1	10.1449	NA	0	NA	NA	NA	NA	NA	NA	NA	NA	NA	NA	NA	NA
intergenic	11:66366686:66366686:1	11	66366686	1	10.1266	NA	0	NA	NA	NA	NA	NA	NA	NA	NA	NA	NA	NA	NA
intergenic	11:66366694:66366694:1	11	66366694	1	36.8421	NA	0	NA	NA	NA	NA	NA	NA	NA	NA	NA	NA	NA	NA
intergenic	11:66366695:66366695:1	11	66366695	1	11.3924	NA	0	NA	NA	NA	NA	NA	NA	NA	NA	NA	NA	NA	NA
intergenic	11:66366701:66366701:1	11	66366701	1	23.9437	NA	0	NA	NA	NA	NA	NA	NA	NA	NA	NA	NA	NA	NA
intergenic	11:66606598:66606598:1	11	66606598	1	22.9508	NA	0	NA	NA	NA	NA	NA	NA	NA	NA	NA	NA	NA	NA
ENSG00000248643	11:66629807:66629807:1	11	66629807	1	33.3333	4	intron (2)	216.465	0.0297571	0.199069	0.149481	0.881174	0.9427	109.599	-0.0967143	0.550777	-0.175596	0.860611	0.948881
ENSG00000248643	11:66629984:66629984:1	11	66629984	1	33.3333	4	intron (2)	216.465	0.0297571	0.199069	0.149481	0.881174	0.9427	109.599	-0.0967143	0.550777	-0.175596	0.860611	0.948881
ENSG00000248643	11:66633317:66633317:1	11	66633317	1	18.1818	4	intron (2)	216.465	0.0297571	0.199069	0.149481	0.881174	0.9427	109.599	-0.0967143	0.550777	-0.175596	0.860611	0.948881
ENSG00000248643	11:66633403:66633403:1	11	66633403	1	21.875	4	intron (2)	216.465	0.0297571	0.199069	0.149481	0.881174	0.9427	109.599	-0.0967143	0.550777	-0.175596	0.860611	0.948881
ENSG00000248643	11:66633484:66633484:1	11	66633484	1	16.6667	4	intron (2)	216.465	0.0297571	0.199069	0.149481	0.881174	0.9427	109.599	-0.0967143	0.550777	-0.175596	0.860611	0.948881
ENSG00000248643	11:66633718:66633718:1	11	66633718	1	46.1538	4	intron (2)	216.465	0.0297571	0.199069	0.149481	0.881174	0.9427	109.599	-0.0967143	0.550777	-0.175596	0.860611	0.948881
ENSG00000248643	11:66635027:66635027:1	11	66635027	1	20	4	intron (2)	216.465	0.0297571	0.199069	0.149481	0.881174	0.9427	109.599	-0.0967143	0.550777	-0.175596	0.860611	0.948881
ENSG00000248643	11:66635105:66635105:1	11	66635105	1	29.0323	4	intron (2)	216.465	0.0297571	0.199069	0.149481	0.881174	0.9427	109.599	-0.0967143	0.550777	-0.175596	0.860611	0.948881
ENSG00000248643	11:66635490:66635490:1	11	66635490	1	10.2564	4	intron (2)	216.465	0.0297571	0.199069	0.149481	0.881174	0.9427	109.599	-0.0967143	0.550777	-0.175596	0.860611	0.948881
ENSG00000248643	11:66635650:66635650:1	11	66635650	1	24.2424	4	intron (2)	216.465	0.0297571	0.199069	0.149481	0.881174	0.9427	109.599	-0.0967143	0.550777	-0.175596	0.860611	0.948881
ENSG00000248643	11:66635780:66635780:1	11	66635780	1	11.4286	4	intron (2)	216.465	0.0297571	0.199069	0.149481	0.881174	0.9427	109.599	-0.0967143	0.550777	-0.175596	0.860611	0.948881
ENSG00000248643	11:66636127:66636127:1	11	66636127	1	11.7647	4	intron (2)	216.465	0.0297571	0.199069	0.149481	0.881174	0.9427	109.599	-0.0967143	0.550777	-0.175596	0.860611	0.948881
ENSG00000248643	11:66636139:66636139:1	11	66636139	1	12.1212	4	intron (2)	216.465	0.0297571	0.199069	0.149481	0.881174	0.9427	109.599	-0.0967143	0.550777	-0.175596	0.860611	0.948881
ENSG00000248643	11:66636411:66636411:1	11	66636411	1	25	4	intron (2)	216.465	0.0297571	0.199069	0.149481	0.881174	0.9427	109.599	-0.0967143	0.550777	-0.175596	0.860611	0.948881
ENSG00000248643	11:66636413:66636413:1	11	66636413	1	20	4	intron (2)	216.465	0.0297571	0.199069	0.149481	0.881174	0.9427	109.599	-0.0967143	0.550777	-0.175596	0.860611	0.948881
ENSG00000248643	11:66636419:66636419:1	11	66636419	1	36.3636	4	intron (2)	216.465	0.0297571	0.199069	0.149481	0.881174	0.9427	109.599	-0.0967143	0.550777	-0.175596	0.860611	0.948881
ENSG00000248643	11:66637182:66637182:1	11	66637182	1	19.2308	4	intron (2)	216.465	0.0297571	0.199069	0.149481	0.881174	0.9427	109.599	-0.0967143	0.550777	-0.175596	0.860611	0.948881
ENSG00000248643	11:66637221:66637221:1	11	66637221	1	17.2414	4	intron (2)	216.465	0.0297571	0.199069	0.149481	0.881174	0.9427	109.599	-0.0967143	0.550777	-0.175596	0.860611	0.948881
ENSG00000173933	11:66648663:66648663:1	11	66648663	1	11.7647	13	downstream (2), intron (1)	1772.34	0.00730348	0.153932	0.0474462	0.962158	0.982077	1934.18	0.179892	0.196858	0.913817	0.360813	0.681454
ENSG00000173933	11:66648667:66648667:1	11	66648667	1	25.4902	13	downstream (2), intron (1)	1772.34	0.00730348	0.153932	0.0474462	0.962158	0.982077	1934.18	0.179892	0.196858	0.913817	0.360813	0.681454
ENSG00000173933	11:66648734:66648734:1	11	66648734	1	10.8696	13	downstream (2), intron (1)	1772.34	0.00730348	0.153932	0.0474462	0.962158	0.982077	1934.18	0.179892	0.196858	0.913817	0.360813	0.681454
ENSG00000173933	11:66649756:66649756:1	11	66649756	1	16.2791	13	downstream (2), intron (1)	1772.34	0.00730348	0.153932	0.0474462	0.962158	0.982077	1934.18	0.179892	0.196858	0.913817	0.360813	0.681454
intergenic	11:66682835:66682835:-1	11	66682835	-1	52.8302	NA	0	NA	NA	NA	NA	NA	NA	NA	NA	NA	NA	NA	NA
intergenic	11:66682839:66682839:-1	11	66682839	-1	13.4615	NA	0	NA	NA	NA	NA	NA	NA	NA	NA	NA	NA	NA	NA
intergenic	11:66682848:66682848:-1	11	66682848	-1	20.9677	NA	0	NA	NA	NA	NA	NA	NA	NA	NA	NA	NA	NA	NA
intergenic	11:66682923:66682923:-1	11	66682923	-1	9.80392	NA	0	NA	NA	NA	NA	NA	NA	NA	NA	NA	NA	NA	NA
intergenic	11:66683049:66683049:-1	11	66683049	-1	28.5714	NA	0	NA	NA	NA	NA	NA	NA	NA	NA	NA	NA	NA	NA
intergenic	11:66684379:66684379:-1	11	66684379	-1	11.9403	NA	0	NA	NA	NA	NA	NA	NA	NA	NA	NA	NA	NA	NA
intergenic	11:66684416:66684416:-1	11	66684416	-1	13.8462	NA	0	NA	NA	NA	NA	NA	NA	NA	NA	NA	NA	NA	NA
intergenic	11:66684468:66684468:-1	11	66684468	-1	24.4898	NA	0	NA	NA	NA	NA	NA	NA	NA	NA	NA	NA	NA	NA
intergenic	11:66684511:66684511:-1	11	66684511	-1	14.2857	NA	0	NA	NA	NA	NA	NA	NA	NA	NA	NA	NA	NA	NA
intergenic	11:66684513:66684513:-1	11	66684513	-1	12.2807	NA	0	NA	NA	NA	NA	NA	NA	NA	NA	NA	NA	NA	NA
intergenic	11:66684540:66684540:-1	11	66684540	-1	7.8125	NA	0	NA	NA	NA	NA	NA	NA	NA	NA	NA	NA	NA	NA
intergenic	11:66684548:66684548:-1	11	66684548	-1	35.7143	NA	0	NA	NA	NA	NA	NA	NA	NA	NA	NA	NA	NA	NA
intergenic	11:66684552:66684552:-1	11	66684552	-1	63.1579	NA	0	NA	NA	NA	NA	NA	NA	NA	NA	NA	NA	NA	NA
intergenic	11:66684553:66684553:-1	11	66684553	-1	46.5517	NA	0	NA	NA	NA	NA	NA	NA	NA	NA	NA	NA	NA	NA
intergenic	11:66684572:66684572:-1	11	66684572	-1	11.1111	NA	0	NA	NA	NA	NA	NA	NA	NA	NA	NA	NA	NA	NA
intergenic	11:66684583:66684583:-1	11	66684583	-1	28.8889	NA	0	NA	NA	NA	NA	NA	NA	NA	NA	NA	NA	NA	NA
ENSG00000173898	11:66723314:66723314:-1	11	66723314	-1	44	12	upstream (1)	6878.43	-0.483296	0.172432	-2.80282	0.00506581	0.0254189	1462.62	-0.238651	0.365212	-0.653458	0.513461	0.786281
ENSG00000173715	11:66756433:66756433:1	11	66756433	1	16.2162	19	CDS (1), intron (1)	3272.95	-0.131567	0.107114	-1.2283	0.219336	0.420283	4109.1	-0.165074	0.16875	-0.978219	0.327966	0.655152
ENSG00000173715	11:66788774:66788774:1	11	66788774	1	20.8333	19	intron (2)	3272.95	-0.131567	0.107114	-1.2283	0.219336	0.420283	4109.1	-0.165074	0.16875	-0.978219	0.327966	0.655152
ENSG00000173715	11:66788845:66788845:1	11	66788845	1	33.3333	19	intron (2)	3272.95	-0.131567	0.107114	-1.2283	0.219336	0.420283	4109.1	-0.165074	0.16875	-0.978219	0.327966	0.655152
ENSG00000173715	11:66790056:66790056:1	11	66790056	1	21.4286	19	intron (2)	3272.95	-0.131567	0.107114	-1.2283	0.219336	0.420283	4109.1	-0.165074	0.16875	-0.978219	0.327966	0.655152
ENSG00000173715	11:66793179:66793179:1	11	66793179	1	25	19	intron (2)	3272.95	-0.131567	0.107114	-1.2283	0.219336	0.420283	4109.1	-0.165074	0.16875	-0.978219	0.327966	0.655152
ENSG00000173715	11:66793186:66793186:1	11	66793186	1	34.7826	19	intron (2)	3272.95	-0.131567	0.107114	-1.2283	0.219336	0.420283	4109.1	-0.165074	0.16875	-0.978219	0.327966	0.655152
ENSG00000173715	11:66793212:66793212:1	11	66793212	1	26.6667	19	intron (2)	3272.95	-0.131567	0.107114	-1.2283	0.219336	0.420283	4109.1	-0.165074	0.16875	-0.978219	0.327966	0.655152
ENSG00000173715	11:66793584:66793584:1	11	66793584	1	21.0526	19	intron (2)	3272.95	-0.131567	0.107114	-1.2283	0.219336	0.420283	4109.1	-0.165074	0.16875	-0.978219	0.327966	0.655152
ENSG00000173715	11:66793645:66793645:1	11	66793645	1	41.9355	19	intron (2)	3272.95	-0.131567	0.107114	-1.2283	0.219336	0.420283	4109.1	-0.165074	0.16875	-0.978219	0.327966	0.655152
ENSG00000173715	11:66793685:66793685:1	11	66793685	1	26.9231	19	intron (2)	3272.95	-0.131567	0.107114	-1.2283	0.219336	0.420283	4109.1	-0.165074	0.16875	-0.978219	0.327966	0.655152
ENSG00000173715	11:66793851:66793851:1	11	66793851	1	33.3333	19	intron (2)	3272.95	-0.131567	0.107114	-1.2283	0.219336	0.420283	4109.1	-0.165074	0.16875	-0.978219	0.327966	0.655152
ENSG00000173715	11:66804674:66804674:1	11	66804674	1	21.4286	19	intron (2)	3272.95	-0.131567	0.107114	-1.2283	0.219336	0.420283	4109.1	-0.165074	0.16875	-0.978219	0.327966	0.655152
ENSG00000173715	11:66804688:66804688:1	11	66804688	1	16.6667	19	intron (2)	3272.95	-0.131567	0.107114	-1.2283	0.219336	0.420283	4109.1	-0.165074	0.16875	-0.978219	0.327966	0.655152
ENSG00000173715	11:66804911:66804911:1	11	66804911	1	76.1905	19	intron (2)	3272.95	-0.131567	0.107114	-1.2283	0.219336	0.420283	4109.1	-0.165074	0.16875	-0.978219	0.327966	0.655152
ENSG00000173715	11:66804914:66804914:1	11	66804914	1	27.2727	19	intron (2)	3272.95	-0.131567	0.107114	-1.2283	0.219336	0.420283	4109.1	-0.165074	0.16875	-0.978219	0.327966	0.655152
ENSG00000173715	11:66804915:66804915:1	11	66804915	1	23.8095	19	intron (2)	3272.95	-0.131567	0.107114	-1.2283	0.219336	0.420283	4109.1	-0.165074	0.16875	-0.978219	0.327966	0.655152
ENSG00000173715	11:66804916:66804916:1	11	66804916	1	60.8696	19	intron (2)	3272.95	-0.131567	0.107114	-1.2283	0.219336	0.420283	4109.1	-0.165074	0.16875	-0.978219	0.327966	0.655152
ENSG00000173715	11:66804920:66804920:1	11	66804920	1	54.1667	19	intron (2)	3272.95	-0.131567	0.107114	-1.2283	0.219336	0.420283	4109.1	-0.165074	0.16875	-0.978219	0.327966	0.655152
ENSG00000173715	11:66805204:66805204:1	11	66805204	1	17.5	19	intron (2)	3272.95	-0.131567	0.107114	-1.2283	0.219336	0.420283	4109.1	-0.165074	0.16875	-0.978219	0.327966	0.655152
ENSG00000173715	11:66805216:66805216:1	11	66805216	1	25.8065	19	intron (2)	3272.95	-0.131567	0.107114	-1.2283	0.219336	0.420283	4109.1	-0.165074	0.16875	-0.978219	0.327966	0.655152
ENSG00000173715	11:66805485:66805485:1	11	66805485	1	30.7692	19	intron (2)	3272.95	-0.131567	0.107114	-1.2283	0.219336	0.420283	4109.1	-0.165074	0.16875	-0.978219	0.327966	0.655152
ENSG00000173715	11:66805486:66805486:1	11	66805486	1	92	19	intron (2)	3272.95	-0.131567	0.107114	-1.2283	0.219336	0.420283	4109.1	-0.165074	0.16875	-0.978219	0.327966	0.655152
ENSG00000173715	11:66805510:66805510:1	11	66805510	1	11.4286	19	intron (2)	3272.95	-0.131567	0.107114	-1.2283	0.219336	0.420283	4109.1	-0.165074	0.16875	-0.978219	0.327966	0.655152
ENSG00000173715	11:66805531:66805531:1	11	66805531	1	87.5	19	intron (2)	3272.95	-0.131567	0.107114	-1.2283	0.219336	0.420283	4109.1	-0.165074	0.16875	-0.978219	0.327966	0.655152
ENSG00000173715	11:66805542:66805542:1	11	66805542	1	16.6667	19	intron (2)	3272.95	-0.131567	0.107114	-1.2283	0.219336	0.420283	4109.1	-0.165074	0.16875	-0.978219	0.327966	0.655152
ENSG00000173715	11:66805561:66805561:1	11	66805561	1	17.3913	19	intron (2)	3272.95	-0.131567	0.107114	-1.2283	0.219336	0.420283	4109.1	-0.165074	0.16875	-0.978219	0.327966	0.655152
ENSG00000173715	11:66805562:66805562:1	11	66805562	1	15.5556	19	intron (2)	3272.95	-0.131567	0.107114	-1.2283	0.219336	0.420283	4109.1	-0.165074	0.16875	-0.978219	0.327966	0.655152
ENSG00000173715	11:66805563:66805563:1	11	66805563	1	20.4545	19	intron (2)	3272.95	-0.131567	0.107114	-1.2283	0.219336	0.420283	4109.1	-0.165074	0.16875	-0.978219	0.327966	0.655152
ENSG00000173715	11:66805596:66805596:1	11	66805596	1	24.3243	19	intron (2)	3272.95	-0.131567	0.107114	-1.2283	0.219336	0.420283	4109.1	-0.165074	0.16875	-0.978219	0.327966	0.655152
ENSG00000173715	11:66805629:66805629:1	11	66805629	1	22.449	19	intron (2)	3272.95	-0.131567	0.107114	-1.2283	0.219336	0.420283	4109.1	-0.165074	0.16875	-0.978219	0.327966	0.655152
ENSG00000173715	11:66805644:66805644:1	11	66805644	1	22.2222	19	intron (2)	3272.95	-0.131567	0.107114	-1.2283	0.219336	0.420283	4109.1	-0.165074	0.16875	-0.978219	0.327966	0.655152
ENSG00000173715	11:66805652:66805652:1	11	66805652	1	20	19	intron (2)	3272.95	-0.131567	0.107114	-1.2283	0.219336	0.420283	4109.1	-0.165074	0.16875	-0.978219	0.327966	0.655152
ENSG00000173715	11:66805655:66805655:1	11	66805655	1	11.1111	19	intron (2)	3272.95	-0.131567	0.107114	-1.2283	0.219336	0.420283	4109.1	-0.165074	0.16875	-0.978219	0.327966	0.655152
ENSG00000173715	11:66805675:66805675:1	11	66805675	1	33.3333	19	intron (2)	3272.95	-0.131567	0.107114	-1.2283	0.219336	0.420283	4109.1	-0.165074	0.16875	-0.978219	0.327966	0.655152
ENSG00000173715	11:66805690:66805690:1	11	66805690	1	19.2308	19	intron (2)	3272.95	-0.131567	0.107114	-1.2283	0.219336	0.420283	4109.1	-0.165074	0.16875	-0.978219	0.327966	0.655152
ENSG00000173715	11:66805698:66805698:1	11	66805698	1	21.7391	19	intron (2)	3272.95	-0.131567	0.107114	-1.2283	0.219336	0.420283	4109.1	-0.165074	0.16875	-0.978219	0.327966	0.655152
ENSG00000173715	11:66805729:66805729:1	11	66805729	1	23.0769	19	intron (2)	3272.95	-0.131567	0.107114	-1.2283	0.219336	0.420283	4109.1	-0.165074	0.16875	-0.978219	0.327966	0.655152
ENSG00000173715	11:66805737:66805737:1	11	66805737	1	14.2857	19	intron (2)	3272.95	-0.131567	0.107114	-1.2283	0.219336	0.420283	4109.1	-0.165074	0.16875	-0.978219	0.327966	0.655152
ENSG00000173715	11:66805738:66805738:1	11	66805738	1	11.7647	19	intron (2)	3272.95	-0.131567	0.107114	-1.2283	0.219336	0.420283	4109.1	-0.165074	0.16875	-0.978219	0.327966	0.655152
ENSG00000173715	11:66806608:66806608:1	11	66806608	1	32	19	intron (2)	3272.95	-0.131567	0.107114	-1.2283	0.219336	0.420283	4109.1	-0.165074	0.16875	-0.978219	0.327966	0.655152
ENSG00000173715	11:66806612:66806612:1	11	66806612	1	55.1724	19	intron (2)	3272.95	-0.131567	0.107114	-1.2283	0.219336	0.420283	4109.1	-0.165074	0.16875	-0.978219	0.327966	0.655152
ENSG00000173715	11:66806617:66806617:1	11	66806617	1	30	19	intron (2)	3272.95	-0.131567	0.107114	-1.2283	0.219336	0.420283	4109.1	-0.165074	0.16875	-0.978219	0.327966	0.655152
ENSG00000173715	11:66806621:66806621:1	11	66806621	1	25.8065	19	intron (2)	3272.95	-0.131567	0.107114	-1.2283	0.219336	0.420283	4109.1	-0.165074	0.16875	-0.978219	0.327966	0.655152
ENSG00000173715	11:66808280:66808280:1	11	66808280	1	18.1818	19	intron (2)	3272.95	-0.131567	0.107114	-1.2283	0.219336	0.420283	4109.1	-0.165074	0.16875	-0.978219	0.327966	0.655152
ENSG00000173715	11:66808421:66808421:1	11	66808421	1	65.625	19	intron (2)	3272.95	-0.131567	0.107114	-1.2283	0.219336	0.420283	4109.1	-0.165074	0.16875	-0.978219	0.327966	0.655152
ENSG00000173715	11:66808438:66808438:1	11	66808438	1	15.625	19	intron (2)	3272.95	-0.131567	0.107114	-1.2283	0.219336	0.420283	4109.1	-0.165074	0.16875	-0.978219	0.327966	0.655152
ENSG00000173715	11:66809773:66809773:1	11	66809773	1	40.9091	19	intron (2)	3272.95	-0.131567	0.107114	-1.2283	0.219336	0.420283	4109.1	-0.165074	0.16875	-0.978219	0.327966	0.655152
ENSG00000173715	11:66809803:66809803:1	11	66809803	1	17.3913	19	intron (2)	3272.95	-0.131567	0.107114	-1.2283	0.219336	0.420283	4109.1	-0.165074	0.16875	-0.978219	0.327966	0.655152
ENSG00000173715	11:66809807:66809807:1	11	66809807	1	28.5714	19	intron (2)	3272.95	-0.131567	0.107114	-1.2283	0.219336	0.420283	4109.1	-0.165074	0.16875	-0.978219	0.327966	0.655152
ENSG00000173715	11:66809847:66809847:1	11	66809847	1	22.7273	19	intron (2)	3272.95	-0.131567	0.107114	-1.2283	0.219336	0.420283	4109.1	-0.165074	0.16875	-0.978219	0.327966	0.655152
ENSG00000173715	11:66811023:66811023:1	11	66811023	1	17.0732	19	intron (2)	3272.95	-0.131567	0.107114	-1.2283	0.219336	0.420283	4109.1	-0.165074	0.16875	-0.978219	0.327966	0.655152
ENSG00000173715	11:66811819:66811819:1	11	66811819	1	50	19	intron (2)	3272.95	-0.131567	0.107114	-1.2283	0.219336	0.420283	4109.1	-0.165074	0.16875	-0.978219	0.327966	0.655152
ENSG00000173715	11:66811826:66811826:1	11	66811826	1	22.7273	19	intron (2)	3272.95	-0.131567	0.107114	-1.2283	0.219336	0.420283	4109.1	-0.165074	0.16875	-0.978219	0.327966	0.655152
ENSG00000173715	11:66811872:66811872:1	11	66811872	1	17.6471	19	intron (2)	3272.95	-0.131567	0.107114	-1.2283	0.219336	0.420283	4109.1	-0.165074	0.16875	-0.978219	0.327966	0.655152
ENSG00000173715	11:66811892:66811892:1	11	66811892	1	26.5306	19	intron (2)	3272.95	-0.131567	0.107114	-1.2283	0.219336	0.420283	4109.1	-0.165074	0.16875	-0.978219	0.327966	0.655152
intergenic	11:66841215:66841215:-1	11	66841215	-1	43.75	NA	0	NA	NA	NA	NA	NA	NA	NA	NA	NA	NA	NA	NA
intergenic	11:66841216:66841216:-1	11	66841216	-1	15.625	NA	0	NA	NA	NA	NA	NA	NA	NA	NA	NA	NA	NA	NA
intergenic	11:66841956:66841956:-1	11	66841956	-1	18.1818	NA	0	NA	NA	NA	NA	NA	NA	NA	NA	NA	NA	NA	NA
ENSG00000173715	11:66841957:66841957:1	11	66841957	1	17.2414	19	intron (2)	3272.95	-0.131567	0.107114	-1.2283	0.219336	0.420283	4109.1	-0.165074	0.16875	-0.978219	0.327966	0.655152
intergenic	11:66842002:66842002:-1	11	66842002	-1	30.7692	NA	0	NA	NA	NA	NA	NA	NA	NA	NA	NA	NA	NA	NA
intergenic	11:66842019:66842019:-1	11	66842019	-1	13.1579	NA	0	NA	NA	NA	NA	NA	NA	NA	NA	NA	NA	NA	NA
ENSG00000173715	11:66842051:66842051:1	11	66842051	1	18.6047	19	intron (2)	3272.95	-0.131567	0.107114	-1.2283	0.219336	0.420283	4109.1	-0.165074	0.16875	-0.978219	0.327966	0.655152
intergenic	11:66842120:66842120:-1	11	66842120	-1	39.1304	NA	0	NA	NA	NA	NA	NA	NA	NA	NA	NA	NA	NA	NA
intergenic	11:66842121:66842121:-1	11	66842121	-1	50	NA	0	NA	NA	NA	NA	NA	NA	NA	NA	NA	NA	NA	NA
intergenic	11:66842196:66842196:-1	11	66842196	-1	20.6897	NA	0	NA	NA	NA	NA	NA	NA	NA	NA	NA	NA	NA	NA
ENSG00000172932	11:67293576:67293576:1	11	67293576	1	7.93651	18	intron (2)	5835.43	0.234991	0.169455	1.38675	0.165519	0.349375	5296.07	0.459893	0.316269	1.45412	0.145913	0.463431
ENSG00000172932	11:67293588:67293588:1	11	67293588	1	11.2903	18	intron (2)	5835.43	0.234991	0.169455	1.38675	0.165519	0.349375	5296.07	0.459893	0.316269	1.45412	0.145913	0.463431
ENSG00000172932	11:67293646:67293646:1	11	67293646	1	28	18	intron (2)	5835.43	0.234991	0.169455	1.38675	0.165519	0.349375	5296.07	0.459893	0.316269	1.45412	0.145913	0.463431
ENSG00000172932	11:67293765:67293765:1	11	67293765	1	33.9623	18	intron (2)	5835.43	0.234991	0.169455	1.38675	0.165519	0.349375	5296.07	0.459893	0.316269	1.45412	0.145913	0.463431
ENSG00000172932	11:67293792:67293792:1	11	67293792	1	7.57576	18	intron (2)	5835.43	0.234991	0.169455	1.38675	0.165519	0.349375	5296.07	0.459893	0.316269	1.45412	0.145913	0.463431
ENSG00000172932	11:67294644:67294644:1	11	67294644	1	10	18	intron (2)	5835.43	0.234991	0.169455	1.38675	0.165519	0.349375	5296.07	0.459893	0.316269	1.45412	0.145913	0.463431
ENSG00000172932	11:67294706:67294706:1	11	67294706	1	12.6984	18	intron (2)	5835.43	0.234991	0.169455	1.38675	0.165519	0.349375	5296.07	0.459893	0.316269	1.45412	0.145913	0.463431
ENSG00000172932	11:67295589:67295589:1	11	67295589	1	37.6623	18	intron (2)	5835.43	0.234991	0.169455	1.38675	0.165519	0.349375	5296.07	0.459893	0.316269	1.45412	0.145913	0.463431
ENSG00000172932	11:67295593:67295593:1	11	67295593	1	45.2055	18	intron (2)	5835.43	0.234991	0.169455	1.38675	0.165519	0.349375	5296.07	0.459893	0.316269	1.45412	0.145913	0.463431
ENSG00000172932	11:67295609:67295609:1	11	67295609	1	9.58904	18	intron (2)	5835.43	0.234991	0.169455	1.38675	0.165519	0.349375	5296.07	0.459893	0.316269	1.45412	0.145913	0.463431
ENSG00000172932	11:67295615:67295615:1	11	67295615	1	35.6164	18	intron (2)	5835.43	0.234991	0.169455	1.38675	0.165519	0.349375	5296.07	0.459893	0.316269	1.45412	0.145913	0.463431
ENSG00000172932	11:67298201:67298201:1	11	67298201	1	10.2041	18	intron (2)	5835.43	0.234991	0.169455	1.38675	0.165519	0.349375	5296.07	0.459893	0.316269	1.45412	0.145913	0.463431
ENSG00000110721	11:68055190:68055190:-1	11	68055190	-1	12.9032	8	intron (2)	18955.8	0.00330578	0.109389	0.0302205	0.975891	0.989316	13635	-0.117486	0.176839	-0.664369	0.506454	0.78227
ENSG00000110721	11:68056774:68056774:-1	11	68056774	-1	8.77193	8	intron (2)	18955.8	0.00330578	0.109389	0.0302205	0.975891	0.989316	13635	-0.117486	0.176839	-0.664369	0.506454	0.78227
ENSG00000110721	11:68056775:68056775:-1	11	68056775	-1	10.5263	8	intron (2)	18955.8	0.00330578	0.109389	0.0302205	0.975891	0.989316	13635	-0.117486	0.176839	-0.664369	0.506454	0.78227
ENSG00000110721	11:68056843:68056843:-1	11	68056843	-1	30.5556	8	intron (2)	18955.8	0.00330578	0.109389	0.0302205	0.975891	0.989316	13635	-0.117486	0.176839	-0.664369	0.506454	0.78227
ENSG00000110721	11:68058028:68058028:-1	11	68058028	-1	8.21918	8	intron (2)	18955.8	0.00330578	0.109389	0.0302205	0.975891	0.989316	13635	-0.117486	0.176839	-0.664369	0.506454	0.78227
ENSG00000110721	11:68060166:68060166:-1	11	68060166	-1	18.75	8	intron (2)	18955.8	0.00330578	0.109389	0.0302205	0.975891	0.989316	13635	-0.117486	0.176839	-0.664369	0.506454	0.78227
ENSG00000110721	11:68061299:68061299:-1	11	68061299	-1	11.7647	8	intron (2)	18955.8	0.00330578	0.109389	0.0302205	0.975891	0.989316	13635	-0.117486	0.176839	-0.664369	0.506454	0.78227
ENSG00000110721	11:68085440:68085440:-1	11	68085440	-1	11.9048	8	intron (2)	18955.8	0.00330578	0.109389	0.0302205	0.975891	0.989316	13635	-0.117486	0.176839	-0.664369	0.506454	0.78227
ENSG00000110721	11:68085895:68085895:-1	11	68085895	-1	16.129	8	intron (2)	18955.8	0.00330578	0.109389	0.0302205	0.975891	0.989316	13635	-0.117486	0.176839	-0.664369	0.506454	0.78227
ENSG00000110721	11:68087360:68087360:-1	11	68087360	-1	10.8696	8	intron (2)	18955.8	0.00330578	0.109389	0.0302205	0.975891	0.989316	13635	-0.117486	0.176839	-0.664369	0.506454	0.78227
ENSG00000110721	11:68087373:68087373:-1	11	68087373	-1	25	8	intron (2)	18955.8	0.00330578	0.109389	0.0302205	0.975891	0.989316	13635	-0.117486	0.176839	-0.664369	0.506454	0.78227
ENSG00000110721	11:68087419:68087419:-1	11	68087419	-1	10.2564	8	intron (2)	18955.8	0.00330578	0.109389	0.0302205	0.975891	0.989316	13635	-0.117486	0.176839	-0.664369	0.506454	0.78227
ENSG00000110721	11:68087463:68087463:-1	11	68087463	-1	40	8	intron (2)	18955.8	0.00330578	0.109389	0.0302205	0.975891	0.989316	13635	-0.117486	0.176839	-0.664369	0.506454	0.78227
ENSG00000110721	11:68087468:68087468:-1	11	68087468	-1	55.5556	8	intron (2)	18955.8	0.00330578	0.109389	0.0302205	0.975891	0.989316	13635	-0.117486	0.176839	-0.664369	0.506454	0.78227
ENSG00000110721	11:68087930:68087930:-1	11	68087930	-1	15.3846	8	intron (2)	18955.8	0.00330578	0.109389	0.0302205	0.975891	0.989316	13635	-0.117486	0.176839	-0.664369	0.506454	0.78227
ENSG00000110721	11:68088826:68088826:-1	11	68088826	-1	33.3333	8	intron (2)	18955.8	0.00330578	0.109389	0.0302205	0.975891	0.989316	13635	-0.117486	0.176839	-0.664369	0.506454	0.78227
ENSG00000110721	11:68093140:68093140:-1	11	68093140	-1	27.7778	8	intron (2)	18955.8	0.00330578	0.109389	0.0302205	0.975891	0.989316	13635	-0.117486	0.176839	-0.664369	0.506454	0.78227
ENSG00000110721	11:68093266:68093266:-1	11	68093266	-1	16.129	8	intron (2)	18955.8	0.00330578	0.109389	0.0302205	0.975891	0.989316	13635	-0.117486	0.176839	-0.664369	0.506454	0.78227
ENSG00000110721	11:68093273:68093273:-1	11	68093273	-1	17.6471	8	intron (2)	18955.8	0.00330578	0.109389	0.0302205	0.975891	0.989316	13635	-0.117486	0.176839	-0.664369	0.506454	0.78227
ENSG00000110721	11:68094291:68094291:-1	11	68094291	-1	22.2222	8	intron (2)	18955.8	0.00330578	0.109389	0.0302205	0.975891	0.989316	13635	-0.117486	0.176839	-0.664369	0.506454	0.78227
ENSG00000162337	11:68378774:68378774:1	11	68378774	1	18.1818	7	intron (1)	6436.68	0.000233755	0.180167	0.00129744	0.998965	0.99982	5372.13	-0.0837731	0.549685	-0.152402	0.87887	0.955015
ENSG00000162337	11:68378776:68378776:1	11	68378776	1	41.6667	7	intron (1)	6436.68	0.000233755	0.180167	0.00129744	0.998965	0.99982	5372.13	-0.0837731	0.549685	-0.152402	0.87887	0.955015
ENSG00000162337	11:68378783:68378783:1	11	68378783	1	16	7	intron (1)	6436.68	0.000233755	0.180167	0.00129744	0.998965	0.99982	5372.13	-0.0837731	0.549685	-0.152402	0.87887	0.955015
ENSG00000162337	11:68442490:68442490:1	11	68442490	1	16.6667	7	intron (1)	6436.68	0.000233755	0.180167	0.00129744	0.998965	0.99982	5372.13	-0.0837731	0.549685	-0.152402	0.87887	0.955015
ENSG00000162337	11:68443920:68443920:1	11	68443920	1	22.7273	7	intron (1)	6436.68	0.000233755	0.180167	0.00129744	0.998965	0.99982	5372.13	-0.0837731	0.549685	-0.152402	0.87887	0.955015
ENSG00000162337	11:68443933:68443933:1	11	68443933	1	54.1667	7	intron (1)	6436.68	0.000233755	0.180167	0.00129744	0.998965	0.99982	5372.13	-0.0837731	0.549685	-0.152402	0.87887	0.955015
ENSG00000149716	11:69664834:69664834:-1	11	69664834	-1	28.5714	18	downstream (1)	2675.99	-0.14028	0.130455	-1.07532	0.282234	0.495502	3499.56	0.312521	0.20952	1.4916	0.135804	0.45013
ENSG00000149716	11:69666043:69666043:-1	11	69666043	-1	9.33333	18	3'UTR (1)	2675.99	-0.14028	0.130455	-1.07532	0.282234	0.495502	3499.56	0.312521	0.20952	1.4916	0.135804	0.45013
ENSG00000149716	11:69666072:69666072:-1	11	69666072	-1	10.7692	18	3'UTR (1)	2675.99	-0.14028	0.130455	-1.07532	0.282234	0.495502	3499.56	0.312521	0.20952	1.4916	0.135804	0.45013
ENSG00000162129	11:72287444:72287444:-1	11	72287444	-1	16.6667	20	3'UTR (1), downstream (3)	1097.06	0.0730885	0.118532	0.616612	0.537491	0.726277	429.667	-0.472543	0.240665	-1.96349	0.0495895	0.269509
ENSG00000162129	11:72287451:72287451:-1	11	72287451	-1	56.25	20	3'UTR (1), downstream (3)	1097.06	0.0730885	0.118532	0.616612	0.537491	0.726277	429.667	-0.472543	0.240665	-1.96349	0.0495895	0.269509
ENSG00000162129	11:72287477:72287477:-1	11	72287477	-1	20	20	3'UTR (1), downstream (3)	1097.06	0.0730885	0.118532	0.616612	0.537491	0.726277	429.667	-0.472543	0.240665	-1.96349	0.0495895	0.269509
ENSG00000162129	11:72287508:72287508:-1	11	72287508	-1	19.2308	20	3'UTR (1), downstream (3)	1097.06	0.0730885	0.118532	0.616612	0.537491	0.726277	429.667	-0.472543	0.240665	-1.96349	0.0495895	0.269509
ENSG00000162129	11:72287509:72287509:-1	11	72287509	-1	25	20	3'UTR (1), downstream (3)	1097.06	0.0730885	0.118532	0.616612	0.537491	0.726277	429.667	-0.472543	0.240665	-1.96349	0.0495895	0.269509
ENSG00000162129	11:72289642:72289642:-1	11	72289642	-1	12.1212	20	3'UTR (1), downstream (3)	1097.06	0.0730885	0.118532	0.616612	0.537491	0.726277	429.667	-0.472543	0.240665	-1.96349	0.0495895	0.269509
ENSG00000162129	11:72290687:72290687:-1	11	72290687	-1	27.5862	20	3'UTR (1), downstream (3)	1097.06	0.0730885	0.118532	0.616612	0.537491	0.726277	429.667	-0.472543	0.240665	-1.96349	0.0495895	0.269509
ENSG00000162129	11:72290699:72290699:-1	11	72290699	-1	26.087	20	3'UTR (1), downstream (3)	1097.06	0.0730885	0.118532	0.616612	0.537491	0.726277	429.667	-0.472543	0.240665	-1.96349	0.0495895	0.269509
ENSG00000162129	11:72290700:72290700:-1	11	72290700	-1	21.7391	20	3'UTR (1), downstream (3)	1097.06	0.0730885	0.118532	0.616612	0.537491	0.726277	429.667	-0.472543	0.240665	-1.96349	0.0495895	0.269509
ENSG00000181924	11:73873676:73873676:-1	11	73873676	-1	23.0769	6	intron (1)	3331.29	-0.0518395	0.109617	-0.472915	0.636274	0.797394	8189.51	0.2709	0.158844	1.70545	0.0881108	0.359819
ENSG00000181924	11:73873681:73873681:-1	11	73873681	-1	11.1111	6	intron (1)	3331.29	-0.0518395	0.109617	-0.472915	0.636274	0.797394	8189.51	0.2709	0.158844	1.70545	0.0881108	0.359819
ENSG00000181924	11:73873770:73873770:-1	11	73873770	-1	35.4167	6	intron (1)	3331.29	-0.0518395	0.109617	-0.472915	0.636274	0.797394	8189.51	0.2709	0.158844	1.70545	0.0881108	0.359819
ENSG00000181924	11:73874284:73874284:-1	11	73874284	-1	15.625	6	intron (1)	3331.29	-0.0518395	0.109617	-0.472915	0.636274	0.797394	8189.51	0.2709	0.158844	1.70545	0.0881108	0.359819
ENSG00000181924	11:73874547:73874547:-1	11	73874547	-1	20	6	intron (1)	3331.29	-0.0518395	0.109617	-0.472915	0.636274	0.797394	8189.51	0.2709	0.158844	1.70545	0.0881108	0.359819
ENSG00000118363	11:74966945:74966945:1	11	74966945	1	23.5294	9	intron (1)	1938.94	-0.0296198	0.119375	-0.248125	0.804038	0.901179	2287.61	0.134688	0.18863	0.71403	0.475209	0.762174
ENSG00000118363	11:74967541:74967541:1	11	74967541	1	36.3636	9	intron (1)	1938.94	-0.0296198	0.119375	-0.248125	0.804038	0.901179	2287.61	0.134688	0.18863	0.71403	0.475209	0.762174
ENSG00000177225	11:768303:768303:-1	11	768303	-1	27.2727	16	3'UTR (1), downstream (2), intron (1)	1605	0.239433	0.158233	1.51317	0.130237	0.296287	964.283	0.521207	0.222884	2.33846	0.0193632	0.160316
ENSG00000177225	11:768321:768321:-1	11	768321	-1	31.5789	16	3'UTR (1), downstream (2), intron (1)	1605	0.239433	0.158233	1.51317	0.130237	0.296287	964.283	0.521207	0.222884	2.33846	0.0193632	0.160316
ENSG00000177225	11:768347:768347:-1	11	768347	-1	20	16	3'UTR (1), downstream (2), intron (1)	1605	0.239433	0.158233	1.51317	0.130237	0.296287	964.283	0.521207	0.222884	2.33846	0.0193632	0.160316
ENSG00000177225	11:768383:768383:-1	11	768383	-1	17.9487	16	3'UTR (1), downstream (2), intron (1)	1605	0.239433	0.158233	1.51317	0.130237	0.296287	964.283	0.521207	0.222884	2.33846	0.0193632	0.160316
ENSG00000177225	11:768386:768386:-1	11	768386	-1	29.7297	16	3'UTR (1), downstream (2), intron (1)	1605	0.239433	0.158233	1.51317	0.130237	0.296287	964.283	0.521207	0.222884	2.33846	0.0193632	0.160316
ENSG00000177225	11:768387:768387:-1	11	768387	-1	16.2162	16	3'UTR (1), downstream (2), intron (1)	1605	0.239433	0.158233	1.51317	0.130237	0.296287	964.283	0.521207	0.222884	2.33846	0.0193632	0.160316
ENSG00000177225	11:768393:768393:-1	11	768393	-1	10.8108	16	3'UTR (1), downstream (2), intron (1)	1605	0.239433	0.158233	1.51317	0.130237	0.296287	964.283	0.521207	0.222884	2.33846	0.0193632	0.160316
ENSG00000177225	11:768437:768437:-1	11	768437	-1	18.1818	16	3'UTR (1), downstream (2), intron (1)	1605	0.239433	0.158233	1.51317	0.130237	0.296287	964.283	0.521207	0.222884	2.33846	0.0193632	0.160316
ENSG00000177225	11:768979:768979:-1	11	768979	-1	12.8205	16	3'UTR (1), downstream (2), intron (1)	1605	0.239433	0.158233	1.51317	0.130237	0.296287	964.283	0.521207	0.222884	2.33846	0.0193632	0.160316
ENSG00000177225	11:769001:769001:-1	11	769001	-1	11.7647	16	3'UTR (1), downstream (2), intron (1)	1605	0.239433	0.158233	1.51317	0.130237	0.296287	964.283	0.521207	0.222884	2.33846	0.0193632	0.160316
ENSG00000177225	11:769018:769018:-1	11	769018	-1	30.7692	16	3'UTR (1), downstream (2), intron (1)	1605	0.239433	0.158233	1.51317	0.130237	0.296287	964.283	0.521207	0.222884	2.33846	0.0193632	0.160316
ENSG00000177225	11:769019:769019:-1	11	769019	-1	21.4286	16	3'UTR (1), downstream (2), intron (1)	1605	0.239433	0.158233	1.51317	0.130237	0.296287	964.283	0.521207	0.222884	2.33846	0.0193632	0.160316
ENSG00000177225	11:769459:769459:-1	11	769459	-1	14.8936	16	3'UTR (1), downstream (2), intron (1)	1605	0.239433	0.158233	1.51317	0.130237	0.296287	964.283	0.521207	0.222884	2.33846	0.0193632	0.160316
ENSG00000177225	11:769489:769489:-1	11	769489	-1	17.5	16	3'UTR (1), downstream (2), intron (1)	1605	0.239433	0.158233	1.51317	0.130237	0.296287	964.283	0.521207	0.222884	2.33846	0.0193632	0.160316
ENSG00000177225	11:769491:769491:-1	11	769491	-1	13.1579	16	3'UTR (1), downstream (2), intron (1)	1605	0.239433	0.158233	1.51317	0.130237	0.296287	964.283	0.521207	0.222884	2.33846	0.0193632	0.160316
ENSG00000177225	11:769895:769895:-1	11	769895	-1	16	16	3'UTR (1), downstream (2), intron (1)	1605	0.239433	0.158233	1.51317	0.130237	0.296287	964.283	0.521207	0.222884	2.33846	0.0193632	0.160316
ENSG00000255284	11:778176:778176:1	11	778176	1	60.9756	3	exon (1), intron (1)	353.879	0.583829	0.151941	3.84248	0.000121797	0.00110779	365.913	0.316134	0.252215	1.25343	0.210049	0.545453
ENSG00000255284	11:778205:778205:1	11	778205	1	48.6486	3	exon (1), intron (1)	353.879	0.583829	0.151941	3.84248	0.000121797	0.00110779	365.913	0.316134	0.252215	1.25343	0.210049	0.545453
ENSG00000255284	11:778263:778263:1	11	778263	1	23.0769	3	intron (2)	353.879	0.583829	0.151941	3.84248	0.000121797	0.00110779	365.913	0.316134	0.252215	1.25343	0.210049	0.545453
ENSG00000255284	11:778354:778354:1	11	778354	1	61.2903	3	intron (2)	353.879	0.583829	0.151941	3.84248	0.000121797	0.00110779	365.913	0.316134	0.252215	1.25343	0.210049	0.545453
ENSG00000255284	11:778665:778665:1	11	778665	1	52.7778	3	intron (2)	353.879	0.583829	0.151941	3.84248	0.000121797	0.00110779	365.913	0.316134	0.252215	1.25343	0.210049	0.545453
ENSG00000255284	11:778802:778802:1	11	778802	1	96.9697	3	intron (2)	353.879	0.583829	0.151941	3.84248	0.000121797	0.00110779	365.913	0.316134	0.252215	1.25343	0.210049	0.545453
ENSG00000149262	11:77923152:77923152:-1	11	77923152	-1	55.5556	11	intron (1)	1463.22	-0.186455	0.115104	-1.61988	0.105258	0.255137	1059.37	-0.216669	0.186572	-1.16132	0.245513	0.579339
ENSG00000149262	11:77923206:77923206:-1	11	77923206	-1	33.3333	11	intron (1)	1463.22	-0.186455	0.115104	-1.61988	0.105258	0.255137	1059.37	-0.216669	0.186572	-1.16132	0.245513	0.579339
ENSG00000151366	11:78068542:78068542:-1	11	78068542	-1	17.0732	5	3'UTR (2), downstream (1)	2286.26	0.589381	0.153301	3.84459	0.000120753	0.00110253	2885.29	0.142179	0.281247	0.50553	0.613187	0.842826
ENSG00000259112	11:78068542:78068542:-1	11	78068542	-1	17.0732	4	intron (3)	NA	NA	NA	NA	NA	NA	NA	NA	NA	NA	NA	NA
ENSG00000151366	11:78068592:78068592:-1	11	78068592	-1	19.0476	5	3'UTR (2), downstream (1)	2286.26	0.589381	0.153301	3.84459	0.000120753	0.00110253	2885.29	0.142179	0.281247	0.50553	0.613187	0.842826
ENSG00000259112	11:78068592:78068592:-1	11	78068592	-1	19.0476	4	intron (3)	NA	NA	NA	NA	NA	NA	NA	NA	NA	NA	NA	NA
ENSG00000151366	11:78068619:78068619:-1	11	78068619	-1	7.59494	5	3'UTR (2), downstream (1)	2286.26	0.589381	0.153301	3.84459	0.000120753	0.00110253	2885.29	0.142179	0.281247	0.50553	0.613187	0.842826
ENSG00000259112	11:78068619:78068619:-1	11	78068619	-1	7.59494	4	intron (3)	NA	NA	NA	NA	NA	NA	NA	NA	NA	NA	NA	NA
ENSG00000151366	11:78068663:78068663:-1	11	78068663	-1	34.6939	5	3'UTR (2), downstream (1)	2286.26	0.589381	0.153301	3.84459	0.000120753	0.00110253	2885.29	0.142179	0.281247	0.50553	0.613187	0.842826
ENSG00000259112	11:78068663:78068663:-1	11	78068663	-1	34.6939	4	intron (3)	NA	NA	NA	NA	NA	NA	NA	NA	NA	NA	NA	NA
ENSG00000151366	11:78068673:78068673:-1	11	78068673	-1	12	5	3'UTR (2), downstream (1)	2286.26	0.589381	0.153301	3.84459	0.000120753	0.00110253	2885.29	0.142179	0.281247	0.50553	0.613187	0.842826
ENSG00000259112	11:78068673:78068673:-1	11	78068673	-1	12	4	intron (3)	NA	NA	NA	NA	NA	NA	NA	NA	NA	NA	NA	NA
ENSG00000151366	11:78069026:78069026:-1	11	78069026	-1	10.1449	5	3'UTR (2), downstream (1)	2286.26	0.589381	0.153301	3.84459	0.000120753	0.00110253	2885.29	0.142179	0.281247	0.50553	0.613187	0.842826
ENSG00000259112	11:78069026:78069026:-1	11	78069026	-1	10.1449	4	intron (3)	NA	NA	NA	NA	NA	NA	NA	NA	NA	NA	NA	NA
ENSG00000151366	11:78069057:78069057:-1	11	78069057	-1	17.3913	5	3'UTR (2), downstream (1)	2286.26	0.589381	0.153301	3.84459	0.000120753	0.00110253	2885.29	0.142179	0.281247	0.50553	0.613187	0.842826
ENSG00000259112	11:78069057:78069057:-1	11	78069057	-1	17.3913	4	intron (3)	NA	NA	NA	NA	NA	NA	NA	NA	NA	NA	NA	NA
ENSG00000151366	11:78069059:78069059:-1	11	78069059	-1	13.6986	5	3'UTR (2), downstream (1)	2286.26	0.589381	0.153301	3.84459	0.000120753	0.00110253	2885.29	0.142179	0.281247	0.50553	0.613187	0.842826
ENSG00000259112	11:78069059:78069059:-1	11	78069059	-1	13.6986	4	intron (3)	NA	NA	NA	NA	NA	NA	NA	NA	NA	NA	NA	NA
ENSG00000151366	11:78069065:78069065:-1	11	78069065	-1	6.75676	5	3'UTR (2), downstream (1)	2286.26	0.589381	0.153301	3.84459	0.000120753	0.00110253	2885.29	0.142179	0.281247	0.50553	0.613187	0.842826
ENSG00000259112	11:78069065:78069065:-1	11	78069065	-1	6.75676	4	intron (3)	NA	NA	NA	NA	NA	NA	NA	NA	NA	NA	NA	NA
ENSG00000151366	11:78069071:78069071:-1	11	78069071	-1	16.4384	5	3'UTR (2), downstream (1)	2286.26	0.589381	0.153301	3.84459	0.000120753	0.00110253	2885.29	0.142179	0.281247	0.50553	0.613187	0.842826
ENSG00000259112	11:78069071:78069071:-1	11	78069071	-1	16.4384	4	intron (3)	NA	NA	NA	NA	NA	NA	NA	NA	NA	NA	NA	NA
ENSG00000151366	11:78069179:78069179:-1	11	78069179	-1	16.9492	5	3'UTR (2), downstream (1)	2286.26	0.589381	0.153301	3.84459	0.000120753	0.00110253	2885.29	0.142179	0.281247	0.50553	0.613187	0.842826
ENSG00000259112	11:78069179:78069179:-1	11	78069179	-1	16.9492	4	intron (3)	NA	NA	NA	NA	NA	NA	NA	NA	NA	NA	NA	NA
ENSG00000246174	11:78142012:78142012:1	11	78142012	1	27.7778	7	intron (2)	420.085	0.488899	0.139244	3.51109	0.000446273	0.00335637	533.368	0.117405	0.20241	0.580033	0.561892	0.814692
ENSG00000246174	11:78142024:78142024:1	11	78142024	1	25	7	intron (2)	420.085	0.488899	0.139244	3.51109	0.000446273	0.00335637	533.368	0.117405	0.20241	0.580033	0.561892	0.814692
ENSG00000246174	11:78142036:78142036:1	11	78142036	1	29.4118	7	intron (2)	420.085	0.488899	0.139244	3.51109	0.000446273	0.00335637	533.368	0.117405	0.20241	0.580033	0.561892	0.814692
ENSG00000255284	11:784208:784208:1	11	784208	1	8.10811	3	downstream (1), exon (1)	353.879	0.583829	0.151941	3.84248	0.000121797	0.00110779	365.913	0.316134	0.252215	1.25343	0.210049	0.545453
ENSG00000246067	11:83085624:83085624:1	11	83085624	1	24	8	downstream (1)	473.586	0.140235	0.142443	0.984502	0.324869	0.539619	1185.79	0.148997	0.199657	0.746262	0.455509	0.750673
ENSG00000246067	11:83086584:83086584:1	11	83086584	1	44	8	downstream (1)	473.586	0.140235	0.142443	0.984502	0.324869	0.539619	1185.79	0.148997	0.199657	0.746262	0.455509	0.750673
intergenic	11:86285229:86285229:1	11	86285229	1	16	NA	0	NA	NA	NA	NA	NA	NA	NA	NA	NA	NA	NA	NA
intergenic	11:86285238:86285238:1	11	86285238	1	14.2857	NA	0	NA	NA	NA	NA	NA	NA	NA	NA	NA	NA	NA	NA
intergenic	11:86285851:86285851:1	11	86285851	1	22.7273	NA	0	NA	NA	NA	NA	NA	NA	NA	NA	NA	NA	NA	NA
intergenic	11:86286054:86286054:1	11	86286054	1	30.4348	NA	0	NA	NA	NA	NA	NA	NA	NA	NA	NA	NA	NA	NA
ENSG00000166441	11:8686287:8686287:1	11	8686287	1	14.8148	12	3'UTR (1)	19999.6	0.418928	0.110473	3.79213	0.000149362	0.00131694	57315.8	0.728007	0.233395	3.1192	0.00181342	0.0382278
ENSG00000166441	11:8686293:8686293:1	11	8686293	1	17.3913	12	3'UTR (1)	19999.6	0.418928	0.110473	3.79213	0.000149362	0.00131694	57315.8	0.728007	0.233395	3.1192	0.00181342	0.0382278
ENSG00000166441	11:8687235:8687235:1	11	8687235	1	48.2759	12	3'UTR (1)	19999.6	0.418928	0.110473	3.79213	0.000149362	0.00131694	57315.8	0.728007	0.233395	3.1192	0.00181342	0.0382278
ENSG00000166441	11:8687238:8687238:1	11	8687238	1	18.9655	12	3'UTR (1)	19999.6	0.418928	0.110473	3.79213	0.000149362	0.00131694	57315.8	0.728007	0.233395	3.1192	0.00181342	0.0382278
ENSG00000166441	11:8687278:8687278:1	11	8687278	1	67.7419	12	3'UTR (1)	19999.6	0.418928	0.110473	3.79213	0.000149362	0.00131694	57315.8	0.728007	0.233395	3.1192	0.00181342	0.0382278
ENSG00000166441	11:8687279:8687279:1	11	8687279	1	29.0323	12	3'UTR (1)	19999.6	0.418928	0.110473	3.79213	0.000149362	0.00131694	57315.8	0.728007	0.233395	3.1192	0.00181342	0.0382278
ENSG00000166471	11:9289125:9289125:-1	11	9289125	-1	62.8571	7	downstream (1), intron (2)	1753.54	0.239379	0.132502	1.80661	0.0708232	0.192161	1326.17	0.183245	0.153096	1.19693	0.231335	0.565664
ENSG00000166471	11:9289132:9289132:-1	11	9289132	-1	11.6279	7	downstream (1), intron (2)	1753.54	0.239379	0.132502	1.80661	0.0708232	0.192161	1326.17	0.183245	0.153096	1.19693	0.231335	0.565664
ENSG00000166471	11:9289135:9289135:-1	11	9289135	-1	21.4286	7	downstream (1), intron (2)	1753.54	0.239379	0.132502	1.80661	0.0708232	0.192161	1326.17	0.183245	0.153096	1.19693	0.231335	0.565664
ENSG00000166471	11:9289216:9289216:-1	11	9289216	-1	39.2857	7	downstream (1), intron (2)	1753.54	0.239379	0.132502	1.80661	0.0708232	0.192161	1326.17	0.183245	0.153096	1.19693	0.231335	0.565664
ENSG00000166471	11:9289276:9289276:-1	11	9289276	-1	70	7	downstream (1), intron (2)	1753.54	0.239379	0.132502	1.80661	0.0708232	0.192161	1326.17	0.183245	0.153096	1.19693	0.231335	0.565664
ENSG00000166471	11:9290948:9290948:-1	11	9290948	-1	16.6667	7	downstream (1), intron (2)	1753.54	0.239379	0.132502	1.80661	0.0708232	0.192161	1326.17	0.183245	0.153096	1.19693	0.231335	0.565664
ENSG00000166471	11:9290949:9290949:-1	11	9290949	-1	18.1818	7	downstream (1), intron (2)	1753.54	0.239379	0.132502	1.80661	0.0708232	0.192161	1326.17	0.183245	0.153096	1.19693	0.231335	0.565664
ENSG00000166471	11:9290959:9290959:-1	11	9290959	-1	16.6667	7	downstream (1), intron (2)	1753.54	0.239379	0.132502	1.80661	0.0708232	0.192161	1326.17	0.183245	0.153096	1.19693	0.231335	0.565664
ENSG00000166471	11:9291203:9291203:-1	11	9291203	-1	26.087	7	downstream (1), intron (2)	1753.54	0.239379	0.132502	1.80661	0.0708232	0.192161	1326.17	0.183245	0.153096	1.19693	0.231335	0.565664
ENSG00000166471	11:9291260:9291260:-1	11	9291260	-1	27.2727	7	downstream (1), intron (2)	1753.54	0.239379	0.132502	1.80661	0.0708232	0.192161	1326.17	0.183245	0.153096	1.19693	0.231335	0.565664
ENSG00000166471	11:9291881:9291881:-1	11	9291881	-1	10.8108	7	downstream (1), intron (2)	1753.54	0.239379	0.132502	1.80661	0.0708232	0.192161	1326.17	0.183245	0.153096	1.19693	0.231335	0.565664
ENSG00000166471	11:9291885:9291885:-1	11	9291885	-1	11.1111	7	downstream (1), intron (2)	1753.54	0.239379	0.132502	1.80661	0.0708232	0.192161	1326.17	0.183245	0.153096	1.19693	0.231335	0.565664
ENSG00000166471	11:9292581:9292581:-1	11	9292581	-1	18.1818	7	downstream (1), intron (2)	1753.54	0.239379	0.132502	1.80661	0.0708232	0.192161	1326.17	0.183245	0.153096	1.19693	0.231335	0.565664
ENSG00000166471	11:9292590:9292590:-1	11	9292590	-1	18.1818	7	downstream (1), intron (2)	1753.54	0.239379	0.132502	1.80661	0.0708232	0.192161	1326.17	0.183245	0.153096	1.19693	0.231335	0.565664
ENSG00000166471	11:9292745:9292745:-1	11	9292745	-1	33.3333	7	downstream (1), intron (2)	1753.54	0.239379	0.132502	1.80661	0.0708232	0.192161	1326.17	0.183245	0.153096	1.19693	0.231335	0.565664
ENSG00000166471	11:9292774:9292774:-1	11	9292774	-1	58.3333	7	downstream (1), intron (2)	1753.54	0.239379	0.132502	1.80661	0.0708232	0.192161	1326.17	0.183245	0.153096	1.19693	0.231335	0.565664
ENSG00000166471	11:9293782:9293782:-1	11	9293782	-1	19.0476	7	downstream (1), intron (2)	1753.54	0.239379	0.132502	1.80661	0.0708232	0.192161	1326.17	0.183245	0.153096	1.19693	0.231335	0.565664
ENSG00000166471	11:9294260:9294260:-1	11	9294260	-1	32.1429	7	downstream (1), intron (2)	1753.54	0.239379	0.132502	1.80661	0.0708232	0.192161	1326.17	0.183245	0.153096	1.19693	0.231335	0.565664
ENSG00000166471	11:9294329:9294329:-1	11	9294329	-1	37.037	7	downstream (1), intron (2)	1753.54	0.239379	0.132502	1.80661	0.0708232	0.192161	1326.17	0.183245	0.153096	1.19693	0.231335	0.565664
ENSG00000166471	11:9294395:9294395:-1	11	9294395	-1	16.129	7	downstream (1), intron (2)	1753.54	0.239379	0.132502	1.80661	0.0708232	0.192161	1326.17	0.183245	0.153096	1.19693	0.231335	0.565664
ENSG00000166471	11:9294401:9294401:-1	11	9294401	-1	16.129	7	downstream (1), intron (2)	1753.54	0.239379	0.132502	1.80661	0.0708232	0.192161	1326.17	0.183245	0.153096	1.19693	0.231335	0.565664
ENSG00000166471	11:9294412:9294412:-1	11	9294412	-1	65.5172	7	downstream (1), intron (2)	1753.54	0.239379	0.132502	1.80661	0.0708232	0.192161	1326.17	0.183245	0.153096	1.19693	0.231335	0.565664
ENSG00000166471	11:9294432:9294432:-1	11	9294432	-1	30.303	7	downstream (1), intron (2)	1753.54	0.239379	0.132502	1.80661	0.0708232	0.192161	1326.17	0.183245	0.153096	1.19693	0.231335	0.565664
ENSG00000166471	11:9294433:9294433:-1	11	9294433	-1	12.5	7	downstream (1), intron (2)	1753.54	0.239379	0.132502	1.80661	0.0708232	0.192161	1326.17	0.183245	0.153096	1.19693	0.231335	0.565664
ENSG00000166471	11:9294438:9294438:-1	11	9294438	-1	14.8148	7	downstream (1), intron (2)	1753.54	0.239379	0.132502	1.80661	0.0708232	0.192161	1326.17	0.183245	0.153096	1.19693	0.231335	0.565664
ENSG00000166012	11:93735426:93735426:-1	11	93735426	-1	16.129	22	downstream (1), intron (1)	5728.57	0.534598	0.117665	4.54338	5.53583e-06	7.39549e-05	7531.83	0.370427	0.171569	2.15906	0.0308455	0.20785
ENSG00000166012	11:93735478:93735478:-1	11	93735478	-1	15.942	22	downstream (1), intron (1)	5728.57	0.534598	0.117665	4.54338	5.53583e-06	7.39549e-05	7531.83	0.370427	0.171569	2.15906	0.0308455	0.20785
ENSG00000166012	11:93735505:93735505:-1	11	93735505	-1	10.9589	22	downstream (1), intron (1)	5728.57	0.534598	0.117665	4.54338	5.53583e-06	7.39549e-05	7531.83	0.370427	0.171569	2.15906	0.0308455	0.20785
ENSG00000166012	11:93735523:93735523:-1	11	93735523	-1	18.0328	22	downstream (1), intron (1)	5728.57	0.534598	0.117665	4.54338	5.53583e-06	7.39549e-05	7531.83	0.370427	0.171569	2.15906	0.0308455	0.20785
ENSG00000166012	11:93735605:93735605:-1	11	93735605	-1	10.2941	22	3'UTR (1), intron (1)	5728.57	0.534598	0.117665	4.54338	5.53583e-06	7.39549e-05	7531.83	0.370427	0.171569	2.15906	0.0308455	0.20785
ENSG00000166012	11:93735606:93735606:-1	11	93735606	-1	17.3913	22	3'UTR (1), intron (1)	5728.57	0.534598	0.117665	4.54338	5.53583e-06	7.39549e-05	7531.83	0.370427	0.171569	2.15906	0.0308455	0.20785
ENSG00000166012	11:93735630:93735630:-1	11	93735630	-1	85.9375	22	3'UTR (1), intron (1)	5728.57	0.534598	0.117665	4.54338	5.53583e-06	7.39549e-05	7531.83	0.370427	0.171569	2.15906	0.0308455	0.20785
ENSG00000182919	11:93761812:93761812:1	11	93761812	1	20	15	3'UTR (5)	3295.9	-0.0768698	0.132924	-0.578299	0.563062	0.746118	1699.74	-0.319285	0.17003	-1.87781	0.0604067	0.297681
ENSG00000182919	11:93761814:93761814:1	11	93761814	1	7.95455	15	3'UTR (5)	3295.9	-0.0768698	0.132924	-0.578299	0.563062	0.746118	1699.74	-0.319285	0.17003	-1.87781	0.0604067	0.297681
ENSG00000182919	11:93761815:93761815:1	11	93761815	1	6.52174	15	3'UTR (5)	3295.9	-0.0768698	0.132924	-0.578299	0.563062	0.746118	1699.74	-0.319285	0.17003	-1.87781	0.0604067	0.297681
ENSG00000182919	11:93764700:93764700:1	11	93764700	1	23.0769	15	3'UTR (1), downstream (4)	3295.9	-0.0768698	0.132924	-0.578299	0.563062	0.746118	1699.74	-0.319285	0.17003	-1.87781	0.0604067	0.297681
ENSG00000020922	11:94416601:94416601:-1	11	94416601	-1	28	10	3'UTR (1), downstream (2)	2542.85	0.0718325	0.122086	0.588375	0.556281	0.741493	741.773	-0.380908	0.257385	-1.47991	0.138897	0.454312
ENSG00000020922	11:94417182:94417182:-1	11	94417182	-1	93.1034	10	3'UTR (1), downstream (2)	2542.85	0.0718325	0.122086	0.588375	0.556281	0.741493	741.773	-0.380908	0.257385	-1.47991	0.138897	0.454312
ENSG00000020922	11:94417288:94417288:-1	11	94417288	-1	18.1818	10	3'UTR (1), downstream (2)	2542.85	0.0718325	0.122086	0.588375	0.556281	0.741493	741.773	-0.380908	0.257385	-1.47991	0.138897	0.454312
ENSG00000111647	12:100033627:100033627:-1	12	100033627	-1	15.7895	10	downstream (2)	6970.08	0.297666	0.115832	2.56981	0.0101754	0.0444684	5888.86	-0.681736	0.175279	-3.88944	0.000100477	0.00565079
ENSG00000111647	12:100033695:100033695:-1	12	100033695	-1	22.8571	10	downstream (2)	6970.08	0.297666	0.115832	2.56981	0.0101754	0.0444684	5888.86	-0.681736	0.175279	-3.88944	0.000100477	0.00565079
ENSG00000111647	12:100033758:100033758:-1	12	100033758	-1	34.4828	10	downstream (2)	6970.08	0.297666	0.115832	2.56981	0.0101754	0.0444684	5888.86	-0.681736	0.175279	-3.88944	0.000100477	0.00565079
ENSG00000111647	12:100033773:100033773:-1	12	100033773	-1	28.125	10	downstream (2)	6970.08	0.297666	0.115832	2.56981	0.0101754	0.0444684	5888.86	-0.681736	0.175279	-3.88944	0.000100477	0.00565079
ENSG00000111647	12:100033803:100033803:-1	12	100033803	-1	11.3636	10	downstream (2)	6970.08	0.297666	0.115832	2.56981	0.0101754	0.0444684	5888.86	-0.681736	0.175279	-3.88944	0.000100477	0.00565079
ENSG00000111647	12:100033804:100033804:-1	12	100033804	-1	27.2727	10	downstream (2)	6970.08	0.297666	0.115832	2.56981	0.0101754	0.0444684	5888.86	-0.681736	0.175279	-3.88944	0.000100477	0.00565079
ENSG00000111647	12:100035549:100035549:-1	12	100035549	-1	37.037	10	downstream (2)	6970.08	0.297666	0.115832	2.56981	0.0101754	0.0444684	5888.86	-0.681736	0.175279	-3.88944	0.000100477	0.00565079
ENSG00000111647	12:100035561:100035561:-1	12	100035561	-1	33.3333	10	downstream (2)	6970.08	0.297666	0.115832	2.56981	0.0101754	0.0444684	5888.86	-0.681736	0.175279	-3.88944	0.000100477	0.00565079
ENSG00000111647	12:100035640:100035640:-1	12	100035640	-1	23.6842	10	downstream (2)	6970.08	0.297666	0.115832	2.56981	0.0101754	0.0444684	5888.86	-0.681736	0.175279	-3.88944	0.000100477	0.00565079
ENSG00000111647	12:100035672:100035672:-1	12	100035672	-1	13.6364	10	downstream (2)	6970.08	0.297666	0.115832	2.56981	0.0101754	0.0444684	5888.86	-0.681736	0.175279	-3.88944	0.000100477	0.00565079
ENSG00000111647	12:100035723:100035723:-1	12	100035723	-1	18.1818	10	downstream (2)	6970.08	0.297666	0.115832	2.56981	0.0101754	0.0444684	5888.86	-0.681736	0.175279	-3.88944	0.000100477	0.00565079
ENSG00000012504	12:100541386:100541386:1	12	100541386	1	23.5294	11	intron (6)	7791.06	1.39216	0.109628	12.699	5.99167e-37	1.57204e-34	11896.5	-0.312492	0.179353	-1.74233	0.0814515	0.347567
ENSG00000012504	12:100541502:100541502:1	12	100541502	1	29.1667	11	intron (6)	7791.06	1.39216	0.109628	12.699	5.99167e-37	1.57204e-34	11896.5	-0.312492	0.179353	-1.74233	0.0814515	0.347567
ENSG00000012504	12:100549217:100549217:1	12	100549217	1	23.8095	11	intron (6)	7791.06	1.39216	0.109628	12.699	5.99167e-37	1.57204e-34	11896.5	-0.312492	0.179353	-1.74233	0.0814515	0.347567
ENSG00000012504	12:100552645:100552645:1	12	100552645	1	22.7273	11	intron (6)	7791.06	1.39216	0.109628	12.699	5.99167e-37	1.57204e-34	11896.5	-0.312492	0.179353	-1.74233	0.0814515	0.347567
ENSG00000012504	12:100552674:100552674:1	12	100552674	1	10.8696	11	intron (6)	7791.06	1.39216	0.109628	12.699	5.99167e-37	1.57204e-34	11896.5	-0.312492	0.179353	-1.74233	0.0814515	0.347567
ENSG00000012504	12:100552732:100552732:1	12	100552732	1	37.8378	11	intron (6)	7791.06	1.39216	0.109628	12.699	5.99167e-37	1.57204e-34	11896.5	-0.312492	0.179353	-1.74233	0.0814515	0.347567
ENSG00000012504	12:100552798:100552798:1	12	100552798	1	50	11	intron (6)	7791.06	1.39216	0.109628	12.699	5.99167e-37	1.57204e-34	11896.5	-0.312492	0.179353	-1.74233	0.0814515	0.347567
ENSG00000012504	12:100558246:100558246:1	12	100558246	1	26.087	11	intron (6)	7791.06	1.39216	0.109628	12.699	5.99167e-37	1.57204e-34	11896.5	-0.312492	0.179353	-1.74233	0.0814515	0.347567
ENSG00000012504	12:100558503:100558503:1	12	100558503	1	11.7647	11	intron (6)	7791.06	1.39216	0.109628	12.699	5.99167e-37	1.57204e-34	11896.5	-0.312492	0.179353	-1.74233	0.0814515	0.347567
ENSG00000012504	12:100558559:100558559:1	12	100558559	1	37.5	11	intron (6)	7791.06	1.39216	0.109628	12.699	5.99167e-37	1.57204e-34	11896.5	-0.312492	0.179353	-1.74233	0.0814515	0.347567
ENSG00000139354	12:100626890:100626890:1	12	100626890	1	31.9444	9	downstream (3)	6301.17	0.573036	0.134661	4.25541	2.08663e-05	0.000239668	3786.38	-0.13614	0.210223	-0.647602	0.517242	0.788545
ENSG00000139354	12:100626891:100626891:1	12	100626891	1	5.44218	9	downstream (3)	6301.17	0.573036	0.134661	4.25541	2.08663e-05	0.000239668	3786.38	-0.13614	0.210223	-0.647602	0.517242	0.788545
ENSG00000139354	12:100626900:100626900:1	12	100626900	1	6.99301	9	downstream (3)	6301.17	0.573036	0.134661	4.25541	2.08663e-05	0.000239668	3786.38	-0.13614	0.210223	-0.647602	0.517242	0.788545
ENSG00000139354	12:100626903:100626903:1	12	100626903	1	19.8529	9	downstream (3)	6301.17	0.573036	0.134661	4.25541	2.08663e-05	0.000239668	3786.38	-0.13614	0.210223	-0.647602	0.517242	0.788545
ENSG00000139354	12:100626925:100626925:1	12	100626925	1	10.7527	9	downstream (3)	6301.17	0.573036	0.134661	4.25541	2.08663e-05	0.000239668	3786.38	-0.13614	0.210223	-0.647602	0.517242	0.788545
ENSG00000139354	12:100626928:100626928:1	12	100626928	1	23.8095	9	downstream (3)	6301.17	0.573036	0.134661	4.25541	2.08663e-05	0.000239668	3786.38	-0.13614	0.210223	-0.647602	0.517242	0.788545
ENSG00000139354	12:100626968:100626968:1	12	100626968	1	48.7179	9	downstream (3)	6301.17	0.573036	0.134661	4.25541	2.08663e-05	0.000239668	3786.38	-0.13614	0.210223	-0.647602	0.517242	0.788545
ENSG00000139354	12:100626969:100626969:1	12	100626969	1	42.1053	9	downstream (3)	6301.17	0.573036	0.134661	4.25541	2.08663e-05	0.000239668	3786.38	-0.13614	0.210223	-0.647602	0.517242	0.788545
ENSG00000139354	12:100627336:100627336:1	12	100627336	1	14.2857	9	downstream (3)	6301.17	0.573036	0.134661	4.25541	2.08663e-05	0.000239668	3786.38	-0.13614	0.210223	-0.647602	0.517242	0.788545
ENSG00000139354	12:100627338:100627338:1	12	100627338	1	11.1111	9	downstream (3)	6301.17	0.573036	0.134661	4.25541	2.08663e-05	0.000239668	3786.38	-0.13614	0.210223	-0.647602	0.517242	0.788545
ENSG00000139354	12:100627339:100627339:1	12	100627339	1	47.2222	9	downstream (3)	6301.17	0.573036	0.134661	4.25541	2.08663e-05	0.000239668	3786.38	-0.13614	0.210223	-0.647602	0.517242	0.788545
ENSG00000139354	12:100627344:100627344:1	12	100627344	1	25	9	downstream (3)	6301.17	0.573036	0.134661	4.25541	2.08663e-05	0.000239668	3786.38	-0.13614	0.210223	-0.647602	0.517242	0.788545
ENSG00000139354	12:100627414:100627414:1	12	100627414	1	60.9756	9	downstream (3)	6301.17	0.573036	0.134661	4.25541	2.08663e-05	0.000239668	3786.38	-0.13614	0.210223	-0.647602	0.517242	0.788545
ENSG00000139354	12:100627416:100627416:1	12	100627416	1	19.0476	9	downstream (3)	6301.17	0.573036	0.134661	4.25541	2.08663e-05	0.000239668	3786.38	-0.13614	0.210223	-0.647602	0.517242	0.788545
ENSG00000139354	12:100627460:100627460:1	12	100627460	1	18.3333	9	downstream (3)	6301.17	0.573036	0.134661	4.25541	2.08663e-05	0.000239668	3786.38	-0.13614	0.210223	-0.647602	0.517242	0.788545
ENSG00000139354	12:100627475:100627475:1	12	100627475	1	8.95522	9	downstream (3)	6301.17	0.573036	0.134661	4.25541	2.08663e-05	0.000239668	3786.38	-0.13614	0.210223	-0.647602	0.517242	0.788545
intergenic	12:10131806:10131806:1	12	10131806	1	10.2041	NA	0	NA	NA	NA	NA	NA	NA	NA	NA	NA	NA	NA	NA
ENSG00000084112	12:108786643:108786643:-1	12	108786643	-1	10	9	3'UTR (1), downstream (2)	2691.47	0.0335712	0.125719	0.267033	0.789443	0.893121	2739.8	-0.103603	0.206726	-0.501161	0.616258	0.843896
ENSG00000076248	12:109105097:109105097:1	12	109105097	1	22.7273	5	intron (2)	7867.28	-0.136339	0.108559	-1.2559	0.209151	0.407476	6030.23	-0.0146882	0.165	-0.0890192	0.929067	0.972508
ENSG00000076248	12:109108485:109108485:1	12	109108485	1	25	5	intron (2)	7867.28	-0.136339	0.108559	-1.2559	0.209151	0.407476	6030.23	-0.0146882	0.165	-0.0890192	0.929067	0.972508
ENSG00000076248	12:109108517:109108517:1	12	109108517	1	13.7931	5	intron (2)	7867.28	-0.136339	0.108559	-1.2559	0.209151	0.407476	6030.23	-0.0146882	0.165	-0.0890192	0.929067	0.972508
ENSG00000139436	12:109940662:109940662:-1	12	109940662	-1	25	20	downstream (2), intron (6)	3155.46	-0.0863301	0.110992	-0.777802	0.436686	0.645123	1355.09	-0.122563	0.196299	-0.624372	0.532383	0.797394
ENSG00000139436	12:109940714:109940714:-1	12	109940714	-1	32	20	downstream (2), intron (6)	3155.46	-0.0863301	0.110992	-0.777802	0.436686	0.645123	1355.09	-0.122563	0.196299	-0.624372	0.532383	0.797394
ENSG00000139436	12:109942044:109942044:-1	12	109942044	-1	17.2414	20	downstream (2), intron (6)	3155.46	-0.0863301	0.110992	-0.777802	0.436686	0.645123	1355.09	-0.122563	0.196299	-0.624372	0.532383	0.797394
ENSG00000196510	12:110396648:110396648:-1	12	110396648	-1	61.1111	12	intron (2)	6347.35	-0.263668	0.101067	-2.60884	0.00908491	0.0406563	4954.5	-0.325601	0.157745	-2.06409	0.0390087	0.237642
ENSG00000196510	12:110396649:110396649:-1	12	110396649	-1	47.3684	12	intron (2)	6347.35	-0.263668	0.101067	-2.60884	0.00908491	0.0406563	4954.5	-0.325601	0.157745	-2.06409	0.0390087	0.237642
ENSG00000196510	12:110396675:110396675:-1	12	110396675	-1	21.7391	12	intron (2)	6347.35	-0.263668	0.101067	-2.60884	0.00908491	0.0406563	4954.5	-0.325601	0.157745	-2.06409	0.0390087	0.237642
ENSG00000196510	12:110397431:110397431:-1	12	110397431	-1	18.5185	12	intron (2)	6347.35	-0.263668	0.101067	-2.60884	0.00908491	0.0406563	4954.5	-0.325601	0.157745	-2.06409	0.0390087	0.237642
ENSG00000196510	12:110397467:110397467:-1	12	110397467	-1	15.3846	12	intron (2)	6347.35	-0.263668	0.101067	-2.60884	0.00908491	0.0406563	4954.5	-0.325601	0.157745	-2.06409	0.0390087	0.237642
ENSG00000196510	12:110398049:110398049:-1	12	110398049	-1	47.0588	12	intron (2)	6347.35	-0.263668	0.101067	-2.60884	0.00908491	0.0406563	4954.5	-0.325601	0.157745	-2.06409	0.0390087	0.237642
ENSG00000196510	12:110398061:110398061:-1	12	110398061	-1	13.5135	12	intron (2)	6347.35	-0.263668	0.101067	-2.60884	0.00908491	0.0406563	4954.5	-0.325601	0.157745	-2.06409	0.0390087	0.237642
ENSG00000196510	12:110398066:110398066:-1	12	110398066	-1	23.6842	12	intron (2)	6347.35	-0.263668	0.101067	-2.60884	0.00908491	0.0406563	4954.5	-0.325601	0.157745	-2.06409	0.0390087	0.237642
[truncated: 6,606 more rows]
