# Supplementary material
Source: HighWire-hosted journal article supplement (doi:10.1101/rna.080097.124)
Supplement: Supplemental_TableS10.xlsx [file Supplemental_TableS10.xlsx]

## Sheet: Supplementary_table_edited_gene
geneSet	description	link	size	overlap	expect	enrichmentRatio	pValue	FDR	userId
GO:0006605	protein targeting	http://amigo.geneontology.org/amigo/term/GO:0006605	412	57	22.2861	2.55765	5.24e-11	4.46e-08	ENSG00000151532;ENSG00000166441;ENSG00000110700;ENSG00000148950;ENSG00000118363;ENSG00000180776;ENSG00000100478;ENSG00000213463;ENSG00000069974;ENSG00000090581;ENSG00000217930;ENSG00000102910;ENSG00000197879;ENSG00000198242;ENSG00000125691;ENSG00000161533;ENSG00000129354;ENSG00000142444;ENSG00000123159;ENSG00000105185;ENSG00000105197;ENSG00000105372;ENSG00000130204;ENSG00000142541;ENSG00000170889…
GO:0034470	ncRNA processing	http://amigo.geneontology.org/amigo/term/GO:0034470	366	49	19.7978	2.47502	3.76e-09	1.13e-06	ENSG00000148843;ENSG00000149262;ENSG00000165526;ENSG00000111615;ENSG00000177192;ENSG00000092094;ENSG00000100890;ENSG00000119616;ENSG00000171490;ENSG00000141076;ENSG00000223496;ENSG00000090861;ENSG00000065457;ENSG00000127804;ENSG00000108651;ENSG00000278053;ENSG00000087995;ENSG00000213339;ENSG00000104907;ENSG00000105372;ENSG00000170889;ENSG00000127054;ENSG00000162408;ENSG00000053372;ENSG00000176261…
GO:0070972	protein localization to endoplasmic reticulum	http://amigo.geneontology.org/amigo/term/GO:0070972	137	27	7.41067	3.6434	3.99e-09	1.13e-06	ENSG00000166441;ENSG00000110700;ENSG00000118363;ENSG00000198242;ENSG00000125691;ENSG00000105372;ENSG00000142541;ENSG00000170889;ENSG00000108107;ENSG00000122406;ENSG00000143742;ENSG00000197756;ENSG00000168028;ENSG00000188846;ENSG00000058262;ENSG00000114850;ENSG00000145362;ENSG00000145425;ENSG00000145592;ENSG00000197860;ENSG00000025796;ENSG00000136240;ENSG00000008988;ENSG00000067167;ENSG00000156482…
GO:0022613	ribonucleoprotein complex biogenesis	http://amigo.geneontology.org/amigo/term/GO:0022613	440	53	23.8007	2.22683	3.44e-08	7.31e-06	ENSG00000148843;ENSG00000149532;ENSG00000149716;ENSG00000149311;ENSG00000111615;ENSG00000119616;ENSG00000179151;ENSG00000171490;ENSG00000155393;ENSG00000141076;ENSG00000223496;ENSG00000127804;ENSG00000198242;ENSG00000108651;ENSG00000278053;ENSG00000167088;ENSG00000178982;ENSG00000105372;ENSG00000142541;ENSG00000170889;ENSG00000162408;ENSG00000053372;ENSG00000188529;ENSG00000126070;ENSG00000122406…
GO:0090150	establishment of protein localization to membrane	http://amigo.geneontology.org/amigo/term/GO:0090150	313	42	16.9309	2.48066	4.66e-08	7.92e-06	ENSG00000166441;ENSG00000110700;ENSG00000188026;ENSG00000180776;ENSG00000103365;ENSG00000197879;ENSG00000198242;ENSG00000125691;ENSG00000136448;ENSG00000142444;ENSG00000105185;ENSG00000105372;ENSG00000142541;ENSG00000170889;ENSG00000108107;ENSG00000116237;ENSG00000122406;ENSG00000163479;ENSG00000143742;ENSG00000101412;ENSG00000215193;ENSG00000064012;ENSG00000197756;ENSG00000168028;ENSG00000188846…
GO:0006413	translational initiation	http://amigo.geneontology.org/amigo/term/GO:0006413	192	28	10.3858	2.696	1.56e-06	0.000208	ENSG00000166441;ENSG00000110700;ENSG00000168002;ENSG00000173933;ENSG00000149716;ENSG00000111361;ENSG00000198242;ENSG00000125691;ENSG00000178982;ENSG00000105372;ENSG00000142541;ENSG00000170889;ENSG00000108107;ENSG00000122406;ENSG00000242372;ENSG00000100353;ENSG00000055332;ENSG00000144231;ENSG00000197756;ENSG00000168028;ENSG00000188846;ENSG00000145425;ENSG00000145592;ENSG00000181163;ENSG00000008988…
GO:0006399	tRNA metabolic process	http://amigo.geneontology.org/amigo/term/GO:0006399	182	27	9.84483	2.74256	1.71e-06	0.000208	ENSG00000165526;ENSG00000139131;ENSG00000257218;ENSG00000177192;ENSG00000092094;ENSG00000129480;ENSG00000100890;ENSG00000090861;ENSG00000065457;ENSG00000087995;ENSG00000213339;ENSG00000104907;ENSG00000176261;ENSG00000122435;ENSG00000117593;ENSG00000160193;ENSG00000123600;ENSG00000128694;ENSG00000206562;ENSG00000178694;ENSG00000132463;ENSG00000106246;ENSG00000248919;ENSG00000165055;ENSG00000107371…
GO:0006401	RNA catabolic process	http://amigo.geneontology.org/amigo/term/GO:0006401	341	39	18.4455	2.11433	7.96e-06	0.000845	ENSG00000166441;ENSG00000110700;ENSG00000168002;ENSG00000149311;ENSG00000150455;ENSG00000169062;ENSG00000179151;ENSG00000223496;ENSG00000127804;ENSG00000198242;ENSG00000125691;ENSG00000130332;ENSG00000123144;ENSG00000105372;ENSG00000134815;ENSG00000142541;ENSG00000170889;ENSG00000108107;ENSG00000120948;ENSG00000053372;ENSG00000126070;ENSG00000142864;ENSG00000122406;ENSG00000265241;ENSG00000101412…
GO:0071826	ribonucleoprotein complex subunit organization	http://amigo.geneontology.org/amigo/term/GO:0071826	245	30	13.2527	2.2637	2.41e-05	0.0022098	ENSG00000149532;ENSG00000149311;ENSG00000126214;ENSG00000179151;ENSG00000198242;ENSG00000167088;ENSG00000178982;ENSG00000105372;ENSG00000142541;ENSG00000053372;ENSG00000188529;ENSG00000126070;ENSG00000122406;ENSG00000117360;ENSG00000242372;ENSG00000100028;ENSG00000100353;ENSG00000144231;ENSG00000168028;ENSG00000144791;ENSG00000114316;ENSG00000003756;ENSG00000151014;ENSG00000132356;ENSG00000164347…
GO:0061641	CENP-A containing chromatin organization	http://amigo.geneontology.org/amigo/term/GO:0061641	31	9	1.67687	5.36715	2.6e-05	0.0022098	ENSG00000129534;ENSG00000137812;ENSG00000166451;ENSG00000162521;ENSG00000132780;ENSG00000120334;ENSG00000153044;ENSG00000181163;ENSG00000102384
GO:0071806	protein transmembrane transport	http://amigo.geneontology.org/amigo/term/GO:0071806	65	13	3.51601	3.69737	3.69e-05	0.00285427	ENSG00000217930;ENSG00000102910;ENSG00000142444;ENSG00000105197;ENSG00000130204;ENSG00000134375;ENSG00000143742;ENSG00000215193;ENSG00000162928;ENSG00000144381;ENSG00000058262;ENSG00000025796;ENSG00000067167
GO:0009451	RNA modification	http://amigo.geneontology.org/amigo/term/GO:0009451	151	21	8.16796	2.57102	6.32e-05	0.00447791	ENSG00000148584;ENSG00000165526;ENSG00000129317;ENSG00000177192;ENSG00000092094;ENSG00000090861;ENSG00000127804;ENSG00000087995;ENSG00000213339;ENSG00000104907;ENSG00000122435;ENSG00000160193;ENSG00000123600;ENSG00000128694;ENSG00000206562;ENSG00000178694;ENSG00000146457;ENSG00000122687;ENSG00000165055;ENSG00000167112;ENSG00000188917
GO:0031023	microtubule organizing center organization	http://amigo.geneontology.org/amigo/term/GO:0031023	134	19	7.24839	2.62127	0.000107	0.00695868	ENSG00000248643;ENSG00000149554;ENSG00000139618;ENSG00000092036;ENSG00000140025;ENSG00000137814;ENSG00000129007;ENSG00000072864;ENSG00000166579;ENSG00000101624;ENSG00000178184;ENSG00000213024;ENSG00000130695;ENSG00000168036;ENSG00000131437;ENSG00000181163;ENSG00000196584;ENSG00000147316;ENSG00000126756
GO:0034248	regulation of cellular amide metabolic process	http://amigo.geneontology.org/amigo/term/GO:0034248	384	39	20.7715	1.87757	0.000115	0.00695868	ENSG00000170946;ENSG00000168002;ENSG00000173933;ENSG00000165526;ENSG00000161813;ENSG00000123353;ENSG00000012504;ENSG00000089022;ENSG00000089154;ENSG00000169062;ENSG00000182768;ENSG00000126602;ENSG00000172840;ENSG00000090861;ENSG00000127804;ENSG00000167657;ENSG00000179218;ENSG00000178982;ENSG00000104824;ENSG00000142541;ENSG00000170889;ENSG00000126070;ENSG00000122406;ENSG00000265241;ENSG00000143742…
GO:0010608	posttranscriptional regulation of gene expression	http://amigo.geneontology.org/amigo/term/GO:0010608	485	46	26.2349	1.75339	0.000148	0.00789484	ENSG00000170946;ENSG00000168002;ENSG00000173933;ENSG00000165526;ENSG00000150455;ENSG00000161813;ENSG00000089022;ENSG00000089154;ENSG00000169062;ENSG00000129474;ENSG00000126775;ENSG00000182768;ENSG00000126602;ENSG00000223496;ENSG00000090861;ENSG00000127804;ENSG00000167657;ENSG00000179218;ENSG00000178982;ENSG00000104824;ENSG00000142541;ENSG00000170889;ENSG00000120948;ENSG00000126070;ENSG00000142864…
GO:0008380	RNA splicing	http://amigo.geneontology.org/amigo/term/GO:0008380	417	41	22.5566	1.81765	0.000157	0.00789484	ENSG00000060339;ENSG00000110700;ENSG00000149532;ENSG00000168002;ENSG00000173933;ENSG00000131876;ENSG00000189091;ENSG00000127804;ENSG00000109111;ENSG00000167088;ENSG00000071626;ENSG00000130332;ENSG00000125651;ENSG00000064607;ENSG00000104824;ENSG00000104859;ENSG00000120948;ENSG00000188529;ENSG00000116350;ENSG00000176261;ENSG00000171960;ENSG00000162664;ENSG00000137948;ENSG00000265241;ENSG00000117360…
GO:0006397	mRNA processing	http://amigo.geneontology.org/amigo/term/GO:0006397	487	46	26.343	1.74619	0.000163	0.00789484	ENSG00000148584;ENSG00000060339;ENSG00000148843;ENSG00000149532;ENSG00000168002;ENSG00000173933;ENSG00000111358;ENSG00000131876;ENSG00000189091;ENSG00000127804;ENSG00000109111;ENSG00000167088;ENSG00000071626;ENSG00000130332;ENSG00000125651;ENSG00000064607;ENSG00000104824;ENSG00000104859;ENSG00000120948;ENSG00000188529;ENSG00000116350;ENSG00000171960;ENSG00000162664;ENSG00000137948;ENSG00000265241…
GO:0016073	snRNA metabolic process	http://amigo.geneontology.org/amigo/term/GO:0016073	95	15	5.13879	2.91898	0.000167	0.00789484	ENSG00000168002;ENSG00000149262;ENSG00000128915;ENSG00000223496;ENSG00000127804;ENSG00000125651;ENSG00000127054;ENSG00000122484;ENSG00000197780;ENSG00000144231;ENSG00000164902;ENSG00000137413;ENSG00000106290;ENSG00000107371;ENSG00000130713
GO:0016072	rRNA metabolic process	http://amigo.geneontology.org/amigo/term/GO:0016072	236	27	12.7658	2.11502	0.000192	0.00857355	ENSG00000148843;ENSG00000111615;ENSG00000119616;ENSG00000171490;ENSG00000141076;ENSG00000223496;ENSG00000127804;ENSG00000108651;ENSG00000278053;ENSG00000123144;ENSG00000105372;ENSG00000170889;ENSG00000162408;ENSG00000053372;ENSG00000122406;ENSG00000125630;ENSG00000138442;ENSG00000168028;ENSG00000188846;ENSG00000178694;ENSG00000087269;ENSG00000151304;ENSG00000146223;ENSG00000124541;ENSG00000122687…
GO:0031647	regulation of protein stability	http://amigo.geneontology.org/amigo/term/GO:0031647	267	29	14.4427	2.00794	0.000277	0.0117554	ENSG00000148584;ENSG00000135679;ENSG00000136152;ENSG00000161944;ENSG00000125691;ENSG00000125912;ENSG00000179218;ENSG00000179262;ENSG00000123159;ENSG00000117758;ENSG00000122406;ENSG00000198625;ENSG00000125885;ENSG00000101109;ENSG00000064601;ENSG00000100219;ENSG00000115977;ENSG00000163162;ENSG00000180228;ENSG00000144381;ENSG00000134086;ENSG00000114316;ENSG00000145362;ENSG00000132846;ENSG00000239857…
GO:0071103	DNA conformation change	http://amigo.geneontology.org/amigo/term/GO:0071103	245	27	13.2527	2.03733	0.000352	0.0136898	ENSG00000134452;ENSG00000119969;ENSG00000020922;ENSG00000129534;ENSG00000137812;ENSG00000166451;ENSG00000166582;ENSG00000177302;ENSG00000178093;ENSG00000105447;ENSG00000127483;ENSG00000162521;ENSG00000132780;ENSG00000120334;ENSG00000101003;ENSG00000099991;ENSG00000068878;ENSG00000134057;ENSG00000153044;ENSG00000181163;ENSG00000158373;ENSG00000096063;ENSG00000147316;ENSG00000147536;ENSG00000104738…
GO:0015931	nucleobase-containing compound transport	http://amigo.geneontology.org/amigo/term/GO:0015931	233	26	12.6035	2.06291	0.00037	0.0136898	ENSG00000198246;ENSG00000184575;ENSG00000169062;ENSG00000102898;ENSG00000168872;ENSG00000197879;ENSG00000109111;ENSG00000213024;ENSG00000171612;ENSG00000116350;ENSG00000117620;ENSG00000265241;ENSG00000160679;ENSG00000242372;ENSG00000160294;ENSG00000100296;ENSG00000093000;ENSG00000144231;ENSG00000157020;ENSG00000168028;ENSG00000169359;ENSG00000113569;ENSG00000164902;ENSG00000181163;ENSG00000120253…
GO:0140053	mitochondrial gene expression	http://amigo.geneontology.org/amigo/term/GO:0140053	159	20	8.6007	2.32539	0.00037	0.0136898	ENSG00000182180;ENSG00000165526;ENSG00000139131;ENSG00000198015;ENSG00000257218;ENSG00000177192;ENSG00000100890;ENSG00000182768;ENSG00000171612;ENSG00000116898;ENSG00000132676;ENSG00000117593;ENSG00000185414;ENSG00000131368;ENSG00000178694;ENSG00000132356;ENSG00000112996;ENSG00000164347;ENSG00000148187;ENSG00000167112
GO:0090305	nucleic acid phosphodiester bond hydrolysis	http://amigo.geneontology.org/amigo/term/GO:0090305	288	30	15.5786	1.92571	0.000448	0.0158561	ENSG00000134452;ENSG00000152457;ENSG00000149532;ENSG00000173715;ENSG00000020922;ENSG00000120868;ENSG00000111358;ENSG00000100890;ENSG00000179151;ENSG00000217930;ENSG00000223496;ENSG00000079313;ENSG00000123144;ENSG00000162408;ENSG00000173614;ENSG00000160049;ENSG00000126070;ENSG00000125871;ENSG00000101347;ENSG00000100387;ENSG00000171865;ENSG00000157036;ENSG00000168028;ENSG00000087269;ENSG00000151014…
GO:0006338	chromatin remodeling	http://amigo.geneontology.org/amigo/term/GO:0006338	150	19	8.11387	2.34167	0.000471	0.0160089	ENSG00000119969;ENSG00000149554;ENSG00000129534;ENSG00000137812;ENSG00000166451;ENSG00000166582;ENSG00000109111;ENSG00000276234;ENSG00000071655;ENSG00000162521;ENSG00000010803;ENSG00000132780;ENSG00000137948;ENSG00000120334;ENSG00000068878;ENSG00000168036;ENSG00000153044;ENSG00000181163;ENSG00000102384
GO:0006403	RNA localization	http://amigo.geneontology.org/amigo/term/GO:0006403	228	25	12.3331	2.02707	0.000618	0.0202093	ENSG00000149311;ENSG00000184575;ENSG00000169062;ENSG00000102898;ENSG00000168872;ENSG00000197879;ENSG00000109111;ENSG00000213024;ENSG00000116350;ENSG00000265241;ENSG00000160679;ENSG00000242372;ENSG00000160294;ENSG00000100296;ENSG00000093000;ENSG00000144231;ENSG00000157020;ENSG00000168028;ENSG00000113569;ENSG00000164902;ENSG00000181163;ENSG00000120253;ENSG00000146731;ENSG00000107371;ENSG00000130713
GO:0071824	protein-DNA complex subunit organization	http://amigo.geneontology.org/amigo/term/GO:0071824	242	26	13.0904	1.98619	0.000662	0.0208283	ENSG00000119969;ENSG00000002016;ENSG00000171681;ENSG00000111358;ENSG00000129534;ENSG00000137812;ENSG00000166451;ENSG00000166582;ENSG00000109111;ENSG00000125691;ENSG00000105447;ENSG00000127483;ENSG00000162521;ENSG00000132780;ENSG00000137948;ENSG00000120334;ENSG00000099991;ENSG00000100387;ENSG00000068878;ENSG00000153044;ENSG00000181163;ENSG00000158373;ENSG00000106290;ENSG00000137054;ENSG00000136938…
GO:0055088	lipid homeostasis	http://amigo.geneontology.org/amigo/term/GO:0055088	125	16	6.76156	2.36632	0.00114587	0.0339032	ENSG00000120053;ENSG00000162337;ENSG00000123353;ENSG00000012504;ENSG00000073060;ENSG00000161944;ENSG00000161533;ENSG00000057252;ENSG00000116833;ENSG00000197296;ENSG00000101076;ENSG00000100219;ENSG00000198911;ENSG00000100344;ENSG00000132356;ENSG00000153291
GO:0070585	protein localization to mitochondrion	http://amigo.geneontology.org/amigo/term/GO:0070585	137	17	7.41067	2.29399	0.0011567	0.0339032	ENSG00000148950;ENSG00000217930;ENSG00000136448;ENSG00000142444;ENSG00000105185;ENSG00000105197;ENSG00000130204;ENSG00000134375;ENSG00000101412;ENSG00000198911;ENSG00000144381;ENSG00000064012;ENSG00000177479;ENSG00000114126;ENSG00000163626;ENSG00000132356;ENSG00000086061
GO:0007006	mitochondrial membrane organization	http://amigo.geneontology.org/amigo/term/GO:0007006	126	16	6.81565	2.34754	0.00124835	0.0353699	ENSG00000125375;ENSG00000156968;ENSG00000197912;ENSG00000136448;ENSG00000142444;ENSG00000105185;ENSG00000105197;ENSG00000007923;ENSG00000101412;ENSG00000064012;ENSG00000114126;ENSG00000171109;ENSG00000163626;ENSG00000051620;ENSG00000241468;ENSG00000182372
GO:0061842	microtubule organizing center localization	http://amigo.geneontology.org/amigo/term/GO:0061842	25	6	1.35231	4.43685	0.00179476	0.0478445	ENSG00000072864;ENSG00000166579;ENSG00000121957;ENSG00000066279;ENSG00000164828;ENSG00000127914
GO:0051169	nuclear transport	http://amigo.geneontology.org/amigo/term/GO:0051169	356	33	19.2569	1.71367	0.0018012	0.0478445	ENSG00000173933;ENSG00000184575;ENSG00000135679;ENSG00000169062;ENSG00000167196;ENSG00000155393;ENSG00000102898;ENSG00000109111;ENSG00000125691;ENSG00000167088;ENSG00000172175;ENSG00000179218;ENSG00000213024;ENSG00000120948;ENSG00000116350;ENSG00000265241;ENSG00000160679;ENSG00000152104;ENSG00000088888;ENSG00000242372;ENSG00000100028;ENSG00000100296;ENSG00000100401;ENSG00000093000;ENSG00000144231…
