# Supplementary material
Source: HighWire-hosted journal article supplement (doi:10.1101/rna.080097.124)
Supplement: Supplemental_TableS11.xlsx [file Supplemental_TableS11.xlsx]

## Sheet: Edited_gene_sets_comparison_BP
geneSet	BiologicalProcess	size	overlap_common	expect_common	enrichmentRatio_common	pValue_common	FDR_common	userId_common	overlap_HEK293T	expect_HEK293T	enrichmentRatio_HEK293T	pValue_HEK293T	FDR_HEK293T	userId_HEK293T	overlap_Huh7.5	expect_Huh7.5	enrichmentRatio_Huh7.5	pValue_Huh7.5	FDR_Huh7.5	userId_Huh7.5
GO:0061641	CENP-A containing chromatin organization	31	9	1.01787	8.84197	4.35997e-07	4.11775e-05	ENSG00000102384;ENSG00000120334;ENSG00000129534;ENSG00000132780;ENSG00000137812;ENSG00000153044;ENSG00000162521;ENSG00000166451;ENSG00000181163	9	2.1092	4.26702	0.000155004	0.00299439	ENSG00000100162;ENSG00000102384;ENSG00000129534;ENSG00000132780;ENSG00000137812;ENSG00000153147;ENSG00000162521;ENSG00000166451;ENSG00000181163	9	1.67687	5.36715	2.59976e-05	0.0022098	ENSG00000102384;ENSG00000120334;ENSG00000129534;ENSG00000132780;ENSG00000137812;ENSG00000153044;ENSG00000162521;ENSG00000166451;ENSG00000181163
GO:0071806	protein transmembrane transport	65	10	2.13425	4.68549	4.6975e-05	0.00285205	ENSG00000058262;ENSG00000102910;ENSG00000105197;ENSG00000130204;ENSG00000134375;ENSG00000142444;ENSG00000143742;ENSG00000144381;ENSG00000162928;ENSG00000215193	12	4.42252	2.71339	0.00129209	0.0203384	ENSG00000058262;ENSG00000102910;ENSG00000105197;ENSG00000105221;ENSG00000111731;ENSG00000130204;ENSG00000134375;ENSG00000142444;ENSG00000143742;ENSG00000144381;ENSG00000162928;ENSG00000215193	13	3.51601	3.69737	3.69376e-05	0.00285427	ENSG00000025796;ENSG00000058262;ENSG00000067167;ENSG00000102910;ENSG00000105197;ENSG00000130204;ENSG00000134375;ENSG00000142444;ENSG00000143742;ENSG00000144381;ENSG00000162928;ENSG00000215193;ENSG00000217930
GO:0070972	protein localization to endoplasmic reticulum	137	21	4.49834	4.66839	3.83902e-09	5.84044e-07	ENSG00000008988;ENSG00000058262;ENSG00000105372;ENSG00000108107;ENSG00000110700;ENSG00000114850;ENSG00000122406;ENSG00000125691;ENSG00000142541;ENSG00000143742;ENSG00000145425;ENSG00000145592;ENSG00000156482;ENSG00000166441;ENSG00000168028;ENSG00000170889;ENSG00000188846;ENSG00000197756;ENSG00000197860;ENSG00000198242;ENSG00000241343	35	9.32131	3.75484	4.74498e-12	4.03323e-10	ENSG00000008988;ENSG00000058262;ENSG00000071082;ENSG00000084733;ENSG00000105372;ENSG00000108107;ENSG00000109475;ENSG00000110700;ENSG00000114850;ENSG00000115839;ENSG00000116251;ENSG00000118181;ENSG00000118454;ENSG00000122406;ENSG00000124614;ENSG00000125691;ENSG00000129128;ENSG00000131469;ENSG00000134419;ENSG00000142541;ENSG00000143742;ENSG00000145425;ENSG00000145592;ENSG00000156482;ENSG00000166441…	27	7.41067	3.6434	3.99032e-09	1.13059e-06	ENSG00000008988;ENSG00000025796;ENSG00000058262;ENSG00000067167;ENSG00000105372;ENSG00000108107;ENSG00000110700;ENSG00000114850;ENSG00000118363;ENSG00000122406;ENSG00000125691;ENSG00000136240;ENSG00000142541;ENSG00000143742;ENSG00000145362;ENSG00000145425;ENSG00000145592;ENSG00000148396;ENSG00000156482;ENSG00000166441;ENSG00000168028;ENSG00000170889;ENSG00000188846;ENSG00000197756;ENSG00000197860…
GO:0006399	tRNA metabolic process	182	24	5.9759	4.01613	6.55753e-09	7.96272e-07	ENSG00000065457;ENSG00000087995;ENSG00000090861;ENSG00000092094;ENSG00000100890;ENSG00000104907;ENSG00000107371;ENSG00000117593;ENSG00000122435;ENSG00000123600;ENSG00000128694;ENSG00000129480;ENSG00000130713;ENSG00000132463;ENSG00000160193;ENSG00000165055;ENSG00000165526;ENSG00000176261;ENSG00000177192;ENSG00000178694;ENSG00000188917;ENSG00000206562;ENSG00000213339;ENSG00000257218	40	12.383	3.23022	2.46499e-11	1.90477e-09	ENSG00000043514;ENSG00000065457;ENSG00000067704;ENSG00000087995;ENSG00000090861;ENSG00000091127;ENSG00000092094;ENSG00000104835;ENSG00000104907;ENSG00000106305;ENSG00000107371;ENSG00000122435;ENSG00000123600;ENSG00000128694;ENSG00000129480;ENSG00000130348;ENSG00000130713;ENSG00000132463;ENSG00000133706;ENSG00000134684;ENSG00000134759;ENSG00000137760;ENSG00000138777;ENSG00000146282;ENSG00000151576…	27	9.84483	2.74256	1.71012e-06	0.000207657	ENSG00000065457;ENSG00000087995;ENSG00000090861;ENSG00000092094;ENSG00000100890;ENSG00000104907;ENSG00000106246;ENSG00000107371;ENSG00000117593;ENSG00000122435;ENSG00000123600;ENSG00000128694;ENSG00000129480;ENSG00000130713;ENSG00000132463;ENSG00000139131;ENSG00000160193;ENSG00000165055;ENSG00000165526;ENSG00000176261;ENSG00000177192;ENSG00000178694;ENSG00000188917;ENSG00000206562;ENSG00000213339…
GO:0006413	translational initiation	192	25	6.30424	3.96558	4.12267e-09	5.84044e-07	ENSG00000008988;ENSG00000055332;ENSG00000105372;ENSG00000108107;ENSG00000110700;ENSG00000111361;ENSG00000122406;ENSG00000125691;ENSG00000130741;ENSG00000142541;ENSG00000144231;ENSG00000145425;ENSG00000145592;ENSG00000156482;ENSG00000166441;ENSG00000168002;ENSG00000168028;ENSG00000170889;ENSG00000173933;ENSG00000178982;ENSG00000181163;ENSG00000188846;ENSG00000197756;ENSG00000198242;ENSG00000241343	46	13.0634	3.52128	2.73115e-14	7.73825e-12	ENSG00000008988;ENSG00000055332;ENSG00000063046;ENSG00000070756;ENSG00000071082;ENSG00000075151;ENSG00000086232;ENSG00000100129;ENSG00000104408;ENSG00000105372;ENSG00000107581;ENSG00000108107;ENSG00000109475;ENSG00000110700;ENSG00000111361;ENSG00000116251;ENSG00000118181;ENSG00000122406;ENSG00000124614;ENSG00000125691;ENSG00000130741;ENSG00000131469;ENSG00000134419;ENSG00000135930;ENSG00000139726…	28	10.3858	2.696	1.56351e-06	0.000207657	ENSG00000008988;ENSG00000055332;ENSG00000100353;ENSG00000105372;ENSG00000108107;ENSG00000110700;ENSG00000111361;ENSG00000122406;ENSG00000125691;ENSG00000130741;ENSG00000142541;ENSG00000144231;ENSG00000145425;ENSG00000145592;ENSG00000149716;ENSG00000156482;ENSG00000166441;ENSG00000168002;ENSG00000168028;ENSG00000170889;ENSG00000173933;ENSG00000178982;ENSG00000181163;ENSG00000188846;ENSG00000197756…
GO:0034470	ncRNA processing	366	43	12.0175	3.57813	3.31069e-13	2.81408e-10	ENSG00000053372;ENSG00000065457;ENSG00000087269;ENSG00000087995;ENSG00000090861;ENSG00000092094;ENSG00000100890;ENSG00000104907;ENSG00000105372;ENSG00000107371;ENSG00000108651;ENSG00000111615;ENSG00000119616;ENSG00000122406;ENSG00000122435;ENSG00000123600;ENSG00000124541;ENSG00000126070;ENSG00000127054;ENSG00000127804;ENSG00000128694;ENSG00000130713;ENSG00000132463;ENSG00000138442;ENSG00000141076…	65	24.9022	2.61021	6.19171e-13	7.51851e-11	ENSG00000043514;ENSG00000053372;ENSG00000055044;ENSG00000065457;ENSG00000077348;ENSG00000086189;ENSG00000087269;ENSG00000087995;ENSG00000090861;ENSG00000091127;ENSG00000092094;ENSG00000096717;ENSG00000100201;ENSG00000101546;ENSG00000104613;ENSG00000104907;ENSG00000105372;ENSG00000107371;ENSG00000108651;ENSG00000112578;ENSG00000117174;ENSG00000119616;ENSG00000122406;ENSG00000122435;ENSG00000123600…	49	19.7978	2.47502	3.75649e-09	1.13059e-06	ENSG00000053372;ENSG00000065457;ENSG00000087269;ENSG00000087995;ENSG00000090861;ENSG00000092094;ENSG00000100890;ENSG00000104907;ENSG00000105372;ENSG00000106246;ENSG00000107371;ENSG00000108651;ENSG00000111615;ENSG00000119616;ENSG00000122406;ENSG00000122435;ENSG00000122687;ENSG00000123600;ENSG00000124541;ENSG00000126070;ENSG00000127054;ENSG00000127804;ENSG00000128694;ENSG00000130713;ENSG00000132463…
GO:0009451	RNA modification	151	17	4.95803	3.42878	9.53485e-06	0.000736784	ENSG00000087995;ENSG00000090861;ENSG00000092094;ENSG00000104907;ENSG00000122435;ENSG00000123600;ENSG00000127804;ENSG00000128694;ENSG00000160193;ENSG00000165055;ENSG00000165526;ENSG00000167112;ENSG00000177192;ENSG00000178694;ENSG00000188917;ENSG00000206562;ENSG00000213339	25	10.2738	2.43336	2.93811e-05	0.000717016	ENSG00000043514;ENSG00000086189;ENSG00000087995;ENSG00000090861;ENSG00000091127;ENSG00000092094;ENSG00000104907;ENSG00000122435;ENSG00000123600;ENSG00000126749;ENSG00000127804;ENSG00000128694;ENSG00000134759;ENSG00000137760;ENSG00000151576;ENSG00000160193;ENSG00000162971;ENSG00000165055;ENSG00000165526;ENSG00000177192;ENSG00000178694;ENSG00000188917;ENSG00000206562;ENSG00000213339;ENSG00000244509	21	8.16796	2.57102	6.32175e-05	0.00447791	ENSG00000087995;ENSG00000090861;ENSG00000092094;ENSG00000104907;ENSG00000122435;ENSG00000122687;ENSG00000123600;ENSG00000127804;ENSG00000128694;ENSG00000129317;ENSG00000146457;ENSG00000148584;ENSG00000160193;ENSG00000165055;ENSG00000165526;ENSG00000167112;ENSG00000177192;ENSG00000178694;ENSG00000188917;ENSG00000206562;ENSG00000213339
GO:0006605	protein targeting	412	45	13.5279	3.32647	1.22014e-12	5.18557e-10	ENSG00000005893;ENSG00000008988;ENSG00000058262;ENSG00000069974;ENSG00000090581;ENSG00000102910;ENSG00000105185;ENSG00000105197;ENSG00000105372;ENSG00000108107;ENSG00000110700;ENSG00000114850;ENSG00000115204;ENSG00000115425;ENSG00000116237;ENSG00000122406;ENSG00000125691;ENSG00000130204;ENSG00000134375;ENSG00000142444;ENSG00000142541;ENSG00000143742;ENSG00000144381;ENSG00000145425;ENSG00000145592…	61	28.032	2.17609	6.2684e-09	3.33009e-07	ENSG00000005893;ENSG00000008988;ENSG00000058262;ENSG00000069974;ENSG00000071082;ENSG00000090581;ENSG00000100099;ENSG00000102910;ENSG00000105185;ENSG00000105197;ENSG00000105221;ENSG00000105372;ENSG00000108107;ENSG00000109475;ENSG00000110700;ENSG00000111731;ENSG00000114850;ENSG00000115204;ENSG00000115425;ENSG00000116237;ENSG00000116251;ENSG00000118181;ENSG00000122406;ENSG00000124614;ENSG00000124783…	57	22.2861	2.55765	5.24447e-11	4.4578e-08	ENSG00000005893;ENSG00000008988;ENSG00000025796;ENSG00000058262;ENSG00000067167;ENSG00000069974;ENSG00000090581;ENSG00000100478;ENSG00000102910;ENSG00000105185;ENSG00000105197;ENSG00000105372;ENSG00000108107;ENSG00000110700;ENSG00000114850;ENSG00000115204;ENSG00000115425;ENSG00000116237;ENSG00000118363;ENSG00000122406;ENSG00000123159;ENSG00000125691;ENSG00000129354;ENSG00000130204;ENSG00000132356…
GO:0090150	establishment of protein localization to membrane	313	34	10.2772	3.30828	8.96568e-10	1.90521e-07	ENSG00000008988;ENSG00000047932;ENSG00000058262;ENSG00000064012;ENSG00000103365;ENSG00000105185;ENSG00000105372;ENSG00000108107;ENSG00000110700;ENSG00000114126;ENSG00000114850;ENSG00000116237;ENSG00000122406;ENSG00000125691;ENSG00000142444;ENSG00000142541;ENSG00000143742;ENSG00000145425;ENSG00000145592;ENSG00000156482;ENSG00000163626;ENSG00000166441;ENSG00000168028;ENSG00000170889;ENSG00000180776…	51	21.2961	2.3948	4.46828e-09	2.53202e-07	ENSG00000008988;ENSG00000047932;ENSG00000058262;ENSG00000064012;ENSG00000071082;ENSG00000084733;ENSG00000100083;ENSG00000103365;ENSG00000105185;ENSG00000105221;ENSG00000105372;ENSG00000108107;ENSG00000109475;ENSG00000110700;ENSG00000111731;ENSG00000114126;ENSG00000114850;ENSG00000115839;ENSG00000116237;ENSG00000116251;ENSG00000118181;ENSG00000122406;ENSG00000124614;ENSG00000124783;ENSG00000125691…	42	16.9309	2.48066	4.659e-08	7.9203e-06	ENSG00000008988;ENSG00000025796;ENSG00000047932;ENSG00000058262;ENSG00000064012;ENSG00000067167;ENSG00000101412;ENSG00000103365;ENSG00000105185;ENSG00000105372;ENSG00000108107;ENSG00000110700;ENSG00000114126;ENSG00000114850;ENSG00000116237;ENSG00000122406;ENSG00000125691;ENSG00000136247;ENSG00000136448;ENSG00000142444;ENSG00000142541;ENSG00000143742;ENSG00000145425;ENSG00000145592;ENSG00000148396…
GO:0140053	mitochondrial gene expression	159	16	5.2207	3.06472	6.93846e-05	0.00368606	ENSG00000100890;ENSG00000112996;ENSG00000116898;ENSG00000117593;ENSG00000131368;ENSG00000132676;ENSG00000165526;ENSG00000167112;ENSG00000171612;ENSG00000177192;ENSG00000178694;ENSG00000182180;ENSG00000182768;ENSG00000185414;ENSG00000198015;ENSG00000257218	30	10.8182	2.77312	2.84392e-07	1.05102e-05	ENSG00000043514;ENSG00000048544;ENSG00000067704;ENSG00000101181;ENSG00000107815;ENSG00000112996;ENSG00000114686;ENSG00000115364;ENSG00000116898;ENSG00000130312;ENSG00000130348;ENSG00000131368;ENSG00000132676;ENSG00000138035;ENSG00000138095;ENSG00000144029;ENSG00000146282;ENSG00000165526;ENSG00000170445;ENSG00000171612;ENSG00000177192;ENSG00000178694;ENSG00000180992;ENSG00000181991;ENSG00000182180…	20	8.6007	2.32539	0.000370429	0.0136898	ENSG00000100890;ENSG00000112996;ENSG00000116898;ENSG00000117593;ENSG00000131368;ENSG00000132356;ENSG00000132676;ENSG00000139131;ENSG00000148187;ENSG00000164347;ENSG00000165526;ENSG00000167112;ENSG00000171612;ENSG00000177192;ENSG00000178694;ENSG00000182180;ENSG00000182768;ENSG00000185414;ENSG00000198015;ENSG00000257218
GO:0006401	RNA catabolic process	341	34	11.1966	3.03664	8.23826e-09	8.75315e-07	ENSG00000008988;ENSG00000053372;ENSG00000105372;ENSG00000107371;ENSG00000108107;ENSG00000110700;ENSG00000120948;ENSG00000122406;ENSG00000125691;ENSG00000126070;ENSG00000127804;ENSG00000130332;ENSG00000130713;ENSG00000134815;ENSG00000142541;ENSG00000142864;ENSG00000144231;ENSG00000145425;ENSG00000145592;ENSG00000149311;ENSG00000151014;ENSG00000156482;ENSG00000166441;ENSG00000168002;ENSG00000168028…	70	23.2012	3.01708	0	0	ENSG00000008988;ENSG00000053372;ENSG00000055917;ENSG00000070756;ENSG00000071082;ENSG00000077348;ENSG00000082898;ENSG00000083312;ENSG00000092199;ENSG00000099783;ENSG00000100722;ENSG00000103342;ENSG00000104408;ENSG00000105372;ENSG00000107371;ENSG00000107951;ENSG00000108107;ENSG00000109475;ENSG00000110700;ENSG00000114416;ENSG00000116251;ENSG00000117751;ENSG00000118181;ENSG00000120948;ENSG00000122406…	39	18.4455	2.11433	7.9565e-06	0.000845378	ENSG00000008988;ENSG00000053372;ENSG00000101412;ENSG00000105372;ENSG00000107371;ENSG00000108107;ENSG00000110700;ENSG00000120948;ENSG00000122406;ENSG00000123144;ENSG00000125691;ENSG00000126070;ENSG00000127804;ENSG00000130332;ENSG00000130713;ENSG00000134815;ENSG00000142541;ENSG00000142864;ENSG00000144231;ENSG00000145425;ENSG00000145592;ENSG00000149311;ENSG00000150455;ENSG00000151014;ENSG00000156482…
GO:0022613	ribonucleoprotein complex biogenesis	440	43	14.4472	2.97635	1.51344e-10	4.28809e-08	ENSG00000003756;ENSG00000053372;ENSG00000087269;ENSG00000096063;ENSG00000100028;ENSG00000105372;ENSG00000105793;ENSG00000107371;ENSG00000108651;ENSG00000111615;ENSG00000114316;ENSG00000117360;ENSG00000119616;ENSG00000122406;ENSG00000124541;ENSG00000126070;ENSG00000127804;ENSG00000130119;ENSG00000130713;ENSG00000130741;ENSG00000138442;ENSG00000141076;ENSG00000142541;ENSG00000144231;ENSG00000144791…	88	29.937	2.9395	0	0	ENSG00000003756;ENSG00000005436;ENSG00000007392;ENSG00000053372;ENSG00000055044;ENSG00000055917;ENSG00000063046;ENSG00000074201;ENSG00000075856;ENSG00000077348;ENSG00000082898;ENSG00000086189;ENSG00000087269;ENSG00000092208;ENSG00000096063;ENSG00000096717;ENSG00000100028;ENSG00000100129;ENSG00000100201;ENSG00000101181;ENSG00000101546;ENSG00000104408;ENSG00000105372;ENSG00000105793;ENSG00000107290…	53	23.8007	2.22683	3.43846e-08	7.30673e-06	ENSG00000003756;ENSG00000053372;ENSG00000087269;ENSG00000096063;ENSG00000100028;ENSG00000100353;ENSG00000105372;ENSG00000105793;ENSG00000107371;ENSG00000108651;ENSG00000111615;ENSG00000114316;ENSG00000117360;ENSG00000119616;ENSG00000122406;ENSG00000122687;ENSG00000124541;ENSG00000126070;ENSG00000127804;ENSG00000130119;ENSG00000130713;ENSG00000130741;ENSG00000132356;ENSG00000138442;ENSG00000141076…
GO:0016072	rRNA metabolic process	236	23	7.74897	2.96814	3.28695e-06	0.000279391	ENSG00000053372;ENSG00000087269;ENSG00000105372;ENSG00000107371;ENSG00000108651;ENSG00000111615;ENSG00000119616;ENSG00000122406;ENSG00000124541;ENSG00000125630;ENSG00000127804;ENSG00000130713;ENSG00000138442;ENSG00000141076;ENSG00000146223;ENSG00000151304;ENSG00000162408;ENSG00000168028;ENSG00000170889;ENSG00000171490;ENSG00000178694;ENSG00000188846;ENSG00000223496	40	16.0571	2.4911	6.97728e-08	2.89583e-06	ENSG00000053372;ENSG00000055044;ENSG00000077348;ENSG00000086189;ENSG00000087269;ENSG00000096717;ENSG00000100201;ENSG00000101546;ENSG00000105372;ENSG00000107371;ENSG00000108651;ENSG00000112578;ENSG00000117174;ENSG00000119616;ENSG00000122406;ENSG00000124541;ENSG00000125630;ENSG00000126749;ENSG00000127080;ENSG00000127616;ENSG00000127804;ENSG00000130713;ENSG00000131469;ENSG00000136045;ENSG00000136271…	27	12.7658	2.11502	0.000191644	0.00857355	ENSG00000053372;ENSG00000087269;ENSG00000105372;ENSG00000107371;ENSG00000108651;ENSG00000111615;ENSG00000119616;ENSG00000122406;ENSG00000122687;ENSG00000123144;ENSG00000124541;ENSG00000125630;ENSG00000127804;ENSG00000130713;ENSG00000138442;ENSG00000141076;ENSG00000146223;ENSG00000148843;ENSG00000151304;ENSG00000162408;ENSG00000168028;ENSG00000170889;ENSG00000171490;ENSG00000178694;ENSG00000188846…
GO:0071826	ribonucleoprotein complex subunit organization	245	22	8.04448	2.73479	1.9722e-05	0.00139697	ENSG00000003756;ENSG00000053372;ENSG00000096063;ENSG00000100028;ENSG00000105372;ENSG00000114316;ENSG00000117360;ENSG00000122406;ENSG00000126070;ENSG00000126214;ENSG00000130741;ENSG00000142541;ENSG00000144231;ENSG00000144791;ENSG00000146963;ENSG00000149311;ENSG00000151014;ENSG00000167088;ENSG00000168028;ENSG00000178982;ENSG00000181163;ENSG00000198242	51	16.6695	3.05948	4.14557e-13	5.87289e-11	ENSG00000003756;ENSG00000005436;ENSG00000007392;ENSG00000053372;ENSG00000055917;ENSG00000063046;ENSG00000074201;ENSG00000075856;ENSG00000092208;ENSG00000096063;ENSG00000100028;ENSG00000100129;ENSG00000104408;ENSG00000105372;ENSG00000107290;ENSG00000107581;ENSG00000108848;ENSG00000111605;ENSG00000114316;ENSG00000117174;ENSG00000117360;ENSG00000117569;ENSG00000122406;ENSG00000124614;ENSG00000125743…	30	13.2527	2.2637	2.40762e-05	0.0022098	ENSG00000003756;ENSG00000053372;ENSG00000096063;ENSG00000100028;ENSG00000100353;ENSG00000105372;ENSG00000114316;ENSG00000117360;ENSG00000122406;ENSG00000126070;ENSG00000126214;ENSG00000130741;ENSG00000132356;ENSG00000142541;ENSG00000144231;ENSG00000144791;ENSG00000146963;ENSG00000148187;ENSG00000149311;ENSG00000149532;ENSG00000151014;ENSG00000164347;ENSG00000167088;ENSG00000168028;ENSG00000178982…
GO:0090305	nucleic acid phosphodiester bond hydrolysis	288	23	9.45637	2.43222	8.1011e-05	0.00382552	ENSG00000020922;ENSG00000049541;ENSG00000087269;ENSG00000100387;ENSG00000100890;ENSG00000101347;ENSG00000107371;ENSG00000111358;ENSG00000113456;ENSG00000120868;ENSG00000124541;ENSG00000125871;ENSG00000126070;ENSG00000130713;ENSG00000151014;ENSG00000152457;ENSG00000157036;ENSG00000160049;ENSG00000162408;ENSG00000168028;ENSG00000171865;ENSG00000173614;ENSG00000223496	37	19.5952	1.88822	0.000139543	0.00278094	ENSG00000009413;ENSG00000049541;ENSG00000077348;ENSG00000087269;ENSG00000100387;ENSG00000101347;ENSG00000107371;ENSG00000111358;ENSG00000111605;ENSG00000113456;ENSG00000114030;ENSG00000117748;ENSG00000117751;ENSG00000120868;ENSG00000124541;ENSG00000125871;ENSG00000126070;ENSG00000130713;ENSG00000138035;ENSG00000138346;ENSG00000145736;ENSG00000151014;ENSG00000152457;ENSG00000152464;ENSG00000154743…	30	15.5786	1.92571	0.000447703	0.0158561	ENSG00000020922;ENSG00000049541;ENSG00000079313;ENSG00000087269;ENSG00000100387;ENSG00000100890;ENSG00000101347;ENSG00000107371;ENSG00000111358;ENSG00000113456;ENSG00000120868;ENSG00000123144;ENSG00000124541;ENSG00000125871;ENSG00000126070;ENSG00000130713;ENSG00000134452;ENSG00000149532;ENSG00000151014;ENSG00000152457;ENSG00000157036;ENSG00000160049;ENSG00000162408;ENSG00000168028;ENSG00000171865…
GO:0006403	RNA localization	228	18	7.48629	2.4044	0.000541157	0.0209083	ENSG00000100296;ENSG00000107371;ENSG00000113569;ENSG00000116350;ENSG00000120253;ENSG00000130713;ENSG00000144231;ENSG00000146731;ENSG00000149311;ENSG00000160294;ENSG00000160679;ENSG00000164902;ENSG00000168028;ENSG00000168872;ENSG00000169062;ENSG00000181163;ENSG00000184575;ENSG00000197879	49	15.5128	3.15868	3.40394e-13	5.7867e-11	ENSG00000030066;ENSG00000055044;ENSG00000069248;ENSG00000074356;ENSG00000082898;ENSG00000100296;ENSG00000107371;ENSG00000110713;ENSG00000111605;ENSG00000112081;ENSG00000113569;ENSG00000115484;ENSG00000116350;ENSG00000117174;ENSG00000120253;ENSG00000124571;ENSG00000124789;ENSG00000125450;ENSG00000125755;ENSG00000130713;ENSG00000132604;ENSG00000135829;ENSG00000136243;ENSG00000136709;ENSG00000138035…	25	12.3331	2.02707	0.000618167	0.0202093	ENSG00000093000;ENSG00000100296;ENSG00000102898;ENSG00000107371;ENSG00000109111;ENSG00000113569;ENSG00000116350;ENSG00000120253;ENSG00000130713;ENSG00000144231;ENSG00000146731;ENSG00000149311;ENSG00000157020;ENSG00000160294;ENSG00000160679;ENSG00000164902;ENSG00000168028;ENSG00000168872;ENSG00000169062;ENSG00000181163;ENSG00000184575;ENSG00000197879;ENSG00000213024;ENSG00000242372;ENSG00000265241
GO:0071103	DNA conformation change	245	18	8.04448	2.23756	0.00124452	0.0423138	ENSG00000020922;ENSG00000096063;ENSG00000099991;ENSG00000101003;ENSG00000102384;ENSG00000104738;ENSG00000119969;ENSG00000120334;ENSG00000127483;ENSG00000129534;ENSG00000132780;ENSG00000137812;ENSG00000147536;ENSG00000153044;ENSG00000162521;ENSG00000166451;ENSG00000177302;ENSG00000181163	36	16.6695	2.15963	9.67373e-06	0.000256958	ENSG00000075856;ENSG00000093009;ENSG00000096063;ENSG00000099991;ENSG00000100162;ENSG00000101003;ENSG00000102384;ENSG00000104738;ENSG00000107290;ENSG00000107815;ENSG00000109805;ENSG00000111642;ENSG00000117748;ENSG00000119969;ENSG00000121152;ENSG00000127311;ENSG00000127483;ENSG00000129534;ENSG00000132780;ENSG00000135829;ENSG00000137812;ENSG00000138346;ENSG00000141510;ENSG00000145736;ENSG00000146918…	27	13.2527	2.03733	0.000351861	0.0136898	ENSG00000020922;ENSG00000068878;ENSG00000096063;ENSG00000099991;ENSG00000101003;ENSG00000102384;ENSG00000104738;ENSG00000105447;ENSG00000119969;ENSG00000120334;ENSG00000127483;ENSG00000129534;ENSG00000132780;ENSG00000134057;ENSG00000134452;ENSG00000136938;ENSG00000137812;ENSG00000147316;ENSG00000147536;ENSG00000153044;ENSG00000158373;ENSG00000162521;ENSG00000166451;ENSG00000166582;ENSG00000177302…
GO:0034248	regulation of cellular amide metabolic process	384	27	12.6085	2.14141	0.000173464	0.00776022	ENSG00000055332;ENSG00000089154;ENSG00000090861;ENSG00000104824;ENSG00000116001;ENSG00000122406;ENSG00000123353;ENSG00000126070;ENSG00000126602;ENSG00000127804;ENSG00000142541;ENSG00000143742;ENSG00000144231;ENSG00000165526;ENSG00000167112;ENSG00000167657;ENSG00000168002;ENSG00000169062;ENSG00000170889;ENSG00000170946;ENSG00000172840;ENSG00000173933;ENSG00000178694;ENSG00000178982;ENSG00000181163…	53	26.1269	2.02856	6.17646e-07	2.1e-05	ENSG00000055332;ENSG00000055917;ENSG00000063046;ENSG00000067560;ENSG00000070756;ENSG00000075151;ENSG00000086232;ENSG00000089154;ENSG00000090861;ENSG00000091127;ENSG00000101181;ENSG00000104408;ENSG00000104824;ENSG00000104852;ENSG00000105221;ENSG00000114416;ENSG00000116001;ENSG00000122406;ENSG00000123353;ENSG00000126070;ENSG00000126602;ENSG00000127804;ENSG00000128699;ENSG00000132478;ENSG00000134644…	39	20.7715	1.87757	0.000114614	0.00695868	ENSG00000012504;ENSG00000055332;ENSG00000064601;ENSG00000089022;ENSG00000089154;ENSG00000090861;ENSG00000100353;ENSG00000102317;ENSG00000104824;ENSG00000116001;ENSG00000116044;ENSG00000122406;ENSG00000122729;ENSG00000123353;ENSG00000126070;ENSG00000126602;ENSG00000127804;ENSG00000132356;ENSG00000142541;ENSG00000143742;ENSG00000144231;ENSG00000161813;ENSG00000165526;ENSG00000167112;ENSG00000167657…
GO:0010608	posttranscriptional regulation of gene expression	485	34	15.9248	2.13504	2.71649e-05	0.00177617	ENSG00000055332;ENSG00000089154;ENSG00000090861;ENSG00000104824;ENSG00000107371;ENSG00000116001;ENSG00000120948;ENSG00000122406;ENSG00000126070;ENSG00000126602;ENSG00000127804;ENSG00000129474;ENSG00000130713;ENSG00000142541;ENSG00000142864;ENSG00000143742;ENSG00000144231;ENSG00000144791;ENSG00000151014;ENSG00000165526;ENSG00000167112;ENSG00000167657;ENSG00000168002;ENSG00000169062;ENSG00000170889…	69	32.9988	2.09099	3.43745e-09	2.08703e-07	ENSG00000015479;ENSG00000055332;ENSG00000055917;ENSG00000063046;ENSG00000067560;ENSG00000070756;ENSG00000075151;ENSG00000077348;ENSG00000082898;ENSG00000083312;ENSG00000086232;ENSG00000089154;ENSG00000090861;ENSG00000091127;ENSG00000092199;ENSG00000099783;ENSG00000100722;ENSG00000101181;ENSG00000104408;ENSG00000104824;ENSG00000105221;ENSG00000107371;ENSG00000114416;ENSG00000116001;ENSG00000117751…	46	26.2349	1.75339	0.000148399	0.00789484	ENSG00000055332;ENSG00000089022;ENSG00000089154;ENSG00000090861;ENSG00000100353;ENSG00000101412;ENSG00000102317;ENSG00000104824;ENSG00000107371;ENSG00000116001;ENSG00000120948;ENSG00000122406;ENSG00000122729;ENSG00000126070;ENSG00000126602;ENSG00000126775;ENSG00000127804;ENSG00000129474;ENSG00000130713;ENSG00000142541;ENSG00000142864;ENSG00000143742;ENSG00000144231;ENSG00000144791;ENSG00000150455…
GO:0008380	RNA splicing	417	28	13.692	2.04499	0.000283165	0.0120345	ENSG00000003756;ENSG00000060339;ENSG00000075292;ENSG00000096063;ENSG00000096401;ENSG00000100028;ENSG00000100296;ENSG00000104824;ENSG00000106344;ENSG00000110700;ENSG00000114316;ENSG00000116001;ENSG00000116350;ENSG00000117360;ENSG00000120948;ENSG00000127804;ENSG00000130332;ENSG00000131051;ENSG00000144231;ENSG00000145833;ENSG00000146963;ENSG00000162664;ENSG00000167088;ENSG00000168002;ENSG00000171960…	70	28.3721	2.46721	1.29452e-12	1.37543e-10	ENSG00000003756;ENSG00000005436;ENSG00000007392;ENSG00000060339;ENSG00000060688;ENSG00000070495;ENSG00000070756;ENSG00000074201;ENSG00000075292;ENSG00000075856;ENSG00000092199;ENSG00000092208;ENSG00000096063;ENSG00000096401;ENSG00000099783;ENSG00000100028;ENSG00000100201;ENSG00000100296;ENSG00000101138;ENSG00000104824;ENSG00000104852;ENSG00000106344;ENSG00000107290;ENSG00000108848;ENSG00000108883…	41	22.5566	1.81765	0.000156896	0.00789484	ENSG00000003756;ENSG00000060339;ENSG00000064607;ENSG00000071626;ENSG00000075292;ENSG00000096063;ENSG00000096401;ENSG00000100028;ENSG00000100296;ENSG00000102317;ENSG00000104824;ENSG00000104859;ENSG00000106344;ENSG00000109111;ENSG00000110700;ENSG00000114316;ENSG00000116001;ENSG00000116350;ENSG00000117360;ENSG00000120948;ENSG00000125651;ENSG00000127804;ENSG00000130332;ENSG00000131051;ENSG00000131876…
GO:0006397	mRNA processing	487	30	15.9905	1.87612	0.000733394	0.0259744	ENSG00000003756;ENSG00000060339;ENSG00000096063;ENSG00000096401;ENSG00000100028;ENSG00000100296;ENSG00000104824;ENSG00000106344;ENSG00000111358;ENSG00000114316;ENSG00000116001;ENSG00000116350;ENSG00000117360;ENSG00000120948;ENSG00000127804;ENSG00000130332;ENSG00000131051;ENSG00000132463;ENSG00000144231;ENSG00000145833;ENSG00000146963;ENSG00000151014;ENSG00000160679;ENSG00000162664;ENSG00000167088…	79	33.1349	2.3842	2.81553e-13	5.7867e-11	ENSG00000003756;ENSG00000005436;ENSG00000007392;ENSG00000060339;ENSG00000060688;ENSG00000070495;ENSG00000070756;ENSG00000074201;ENSG00000074356;ENSG00000075856;ENSG00000092199;ENSG00000092208;ENSG00000096063;ENSG00000096401;ENSG00000099783;ENSG00000100028;ENSG00000100201;ENSG00000100296;ENSG00000100722;ENSG00000101138;ENSG00000104824;ENSG00000104852;ENSG00000106344;ENSG00000107290;ENSG00000107951…	46	26.343	1.74619	0.000163191	0.00789484	ENSG00000003756;ENSG00000060339;ENSG00000064607;ENSG00000071626;ENSG00000096063;ENSG00000096401;ENSG00000100028;ENSG00000100296;ENSG00000102317;ENSG00000104824;ENSG00000104859;ENSG00000106344;ENSG00000109111;ENSG00000111358;ENSG00000114316;ENSG00000116001;ENSG00000116350;ENSG00000117360;ENSG00000120948;ENSG00000125651;ENSG00000127804;ENSG00000130332;ENSG00000131051;ENSG00000131876;ENSG00000132463…
GO:0006260	DNA replication	268	22	8.79968	2.50009	7.69624e-05	0.00382552	ENSG00000020922;ENSG00000049541;ENSG00000075131;ENSG00000085840;ENSG00000101003;ENSG00000101347;ENSG00000104738;ENSG00000115942;ENSG00000125871;ENSG00000125885;ENSG00000132780;ENSG00000139618;ENSG00000143751;ENSG00000147536;ENSG00000149311;ENSG00000149554;ENSG00000162521;ENSG00000168411;ENSG00000171865;ENSG00000177302;ENSG00000248643;ENSG00000256525	52	18.2344	2.85176	4.28702e-12	4.03323e-10	ENSG00000006634;ENSG00000009413;ENSG00000014138;ENSG00000049541;ENSG00000069275;ENSG00000075131;ENSG00000093009;ENSG00000100297;ENSG00000100479;ENSG00000100865;ENSG00000101003;ENSG00000101347;ENSG00000103423;ENSG00000104738;ENSG00000107815;ENSG00000110713;ENSG00000115942;ENSG00000117748;ENSG00000121892;ENSG00000125871;ENSG00000125885;ENSG00000127311;ENSG00000129197;ENSG00000130997;ENSG00000132604…	NA	NA	NA	NA	NA	NA
GO:0006310	DNA recombination	273	20	8.96385	2.23118	0.000707304	0.0259744	ENSG00000002016;ENSG00000020922;ENSG00000076248;ENSG00000080345;ENSG00000101347;ENSG00000107371;ENSG00000125843;ENSG00000125885;ENSG00000129566;ENSG00000139618;ENSG00000144381;ENSG00000147536;ENSG00000149311;ENSG00000149554;ENSG00000152457;ENSG00000161010;ENSG00000168411;ENSG00000196584;ENSG00000223496;ENSG00000248643	44	18.5746	2.36883	7.1544e-08	2.89583e-06	ENSG00000002016;ENSG00000069275;ENSG00000076248;ENSG00000080345;ENSG00000093009;ENSG00000101347;ENSG00000107290;ENSG00000107371;ENSG00000114030;ENSG00000117748;ENSG00000122678;ENSG00000125843;ENSG00000125885;ENSG00000126215;ENSG00000127311;ENSG00000127423;ENSG00000129197;ENSG00000129566;ENSG00000130997;ENSG00000132604;ENSG00000133789;ENSG00000134758;ENSG00000136273;ENSG00000139618;ENSG00000144381…	NA	NA	NA	NA	NA	NA
GO:0016073	snRNA metabolic process	95	12	3.11929	3.84703	6.30794e-05	0.0035745	ENSG00000107371;ENSG00000122484;ENSG00000127054;ENSG00000127804;ENSG00000128915;ENSG00000130713;ENSG00000137413;ENSG00000144231;ENSG00000164902;ENSG00000168002;ENSG00000197780;ENSG00000223496	NA	NA	NA	NA	NA	NA	15	5.13879	2.91898	0.000167185	0.00789484	ENSG00000106290;ENSG00000107371;ENSG00000122484;ENSG00000125651;ENSG00000127054;ENSG00000127804;ENSG00000128915;ENSG00000130713;ENSG00000137413;ENSG00000144231;ENSG00000149262;ENSG00000164902;ENSG00000168002;ENSG00000197780;ENSG00000223496
GO:0033108	mitochondrial respiratory chain complex assembly	96	11	3.15212	3.48971	0.000303673	0.0122915	ENSG00000023228;ENSG00000101247;ENSG00000133028;ENSG00000151366;ENSG00000154079;ENSG00000160194;ENSG00000163626;ENSG00000167985;ENSG00000171612;ENSG00000183648;ENSG00000186687	NA	NA	NA	NA	NA	NA	NA	NA	NA	NA	NA	NA
GO:0015931	nucleobase-containing compound transport	233	NA	NA	NA	NA	NA	NA	45	15.853	2.83858	1.42003e-10	1.00586e-08	ENSG00000030066;ENSG00000069248;ENSG00000074356;ENSG00000082898;ENSG00000100296;ENSG00000100372;ENSG00000110713;ENSG00000111605;ENSG00000112081;ENSG00000113569;ENSG00000116350;ENSG00000117620;ENSG00000120253;ENSG00000124571;ENSG00000124789;ENSG00000125450;ENSG00000125454;ENSG00000125755;ENSG00000132604;ENSG00000135829;ENSG00000136243;ENSG00000136709;ENSG00000138035;ENSG00000138095;ENSG00000139496…	26	12.6035	2.06291	0.0003703	0.0136898	ENSG00000093000;ENSG00000100296;ENSG00000102898;ENSG00000109111;ENSG00000113569;ENSG00000116350;ENSG00000117620;ENSG00000120253;ENSG00000144231;ENSG00000157020;ENSG00000160294;ENSG00000160679;ENSG00000164638;ENSG00000164902;ENSG00000168028;ENSG00000168872;ENSG00000169062;ENSG00000169359;ENSG00000171612;ENSG00000181163;ENSG00000184575;ENSG00000197879;ENSG00000198246;ENSG00000213024;ENSG00000242372…
GO:0051169	nuclear transport	356	NA	NA	NA	NA	NA	NA	56	24.2218	2.31197	2.92479e-09	1.91236e-07	ENSG00000030066;ENSG00000058272;ENSG00000065150;ENSG00000069248;ENSG00000082898;ENSG00000083312;ENSG00000088888;ENSG00000092208;ENSG00000096717;ENSG00000100028;ENSG00000100296;ENSG00000100401;ENSG00000105576;ENSG00000110713;ENSG00000111605;ENSG00000112081;ENSG00000113569;ENSG00000114030;ENSG00000116350;ENSG00000120253;ENSG00000120948;ENSG00000124207;ENSG00000124571;ENSG00000124789;ENSG00000125450…	33	19.2569	1.71367	0.0018012	0.0478445	ENSG00000041802;ENSG00000088888;ENSG00000093000;ENSG00000100028;ENSG00000100296;ENSG00000100401;ENSG00000102898;ENSG00000109111;ENSG00000113569;ENSG00000116350;ENSG00000120253;ENSG00000120948;ENSG00000125691;ENSG00000135679;ENSG00000136938;ENSG00000144231;ENSG00000152104;ENSG00000155393;ENSG00000160679;ENSG00000164902;ENSG00000167088;ENSG00000167196;ENSG00000168028;ENSG00000169062;ENSG00000172175…
GO:0071824	protein-DNA complex subunit organization	242	NA	NA	NA	NA	NA	NA	36	16.4654	2.18641	7.30351e-06	0.000200258	ENSG00000002016;ENSG00000013275;ENSG00000075856;ENSG00000093009;ENSG00000099991;ENSG00000100162;ENSG00000100387;ENSG00000100519;ENSG00000102384;ENSG00000111358;ENSG00000111530;ENSG00000112701;ENSG00000117505;ENSG00000117748;ENSG00000119969;ENSG00000125691;ENSG00000127483;ENSG00000127616;ENSG00000129534;ENSG00000132780;ENSG00000137054;ENSG00000137812;ENSG00000141510;ENSG00000143442;ENSG00000145734…	26	13.0904	1.98619	0.000661606	0.0208283	ENSG00000002016;ENSG00000068878;ENSG00000099991;ENSG00000100387;ENSG00000102384;ENSG00000105447;ENSG00000106290;ENSG00000109111;ENSG00000111358;ENSG00000119969;ENSG00000120334;ENSG00000125691;ENSG00000127483;ENSG00000129534;ENSG00000132780;ENSG00000136938;ENSG00000137054;ENSG00000137812;ENSG00000137948;ENSG00000153044;ENSG00000158373;ENSG00000162521;ENSG00000166451;ENSG00000166582;ENSG00000171681…
GO:0006338	chromatin remodeling	150	NA	NA	NA	NA	NA	NA	20	10.2058	1.95967	0.00290632	0.0418707	ENSG00000009954;ENSG00000071655;ENSG00000092199;ENSG00000100162;ENSG00000102384;ENSG00000111642;ENSG00000117505;ENSG00000119969;ENSG00000127616;ENSG00000129534;ENSG00000132780;ENSG00000137812;ENSG00000149554;ENSG00000153147;ENSG00000153922;ENSG00000162521;ENSG00000162601;ENSG00000166451;ENSG00000173473;ENSG00000181163	19	8.11387	2.34167	0.000470849	0.0160089	ENSG00000010803;ENSG00000068878;ENSG00000071655;ENSG00000102384;ENSG00000109111;ENSG00000119969;ENSG00000120334;ENSG00000129534;ENSG00000132780;ENSG00000137812;ENSG00000137948;ENSG00000149554;ENSG00000153044;ENSG00000162521;ENSG00000166451;ENSG00000166582;ENSG00000168036;ENSG00000181163;ENSG00000276234
GO:0034504	protein localization to nucleus	267	NA	NA	NA	NA	NA	NA	35	18.1663	1.92664	0.000140683	0.00278094	ENSG00000065150;ENSG00000068654;ENSG00000069248;ENSG00000082898;ENSG00000083312;ENSG00000088888;ENSG00000096717;ENSG00000100401;ENSG00000100625;ENSG00000105576;ENSG00000110713;ENSG00000113569;ENSG00000114030;ENSG00000115484;ENSG00000120948;ENSG00000124207;ENSG00000124789;ENSG00000125450;ENSG00000125691;ENSG00000129197;ENSG00000135679;ENSG00000137413;ENSG00000138496;ENSG00000139496;ENSG00000140464…	NA	NA	NA	NA	NA	NA
GO:0044772	mitotic cell cycle phase transition	486	NA	NA	NA	NA	NA	NA	63	33.0668	1.90523	5.22896e-07	1.85192e-05	ENSG00000004897;ENSG00000006634;ENSG00000013810;ENSG00000014138;ENSG00000072864;ENSG00000080986;ENSG00000089053;ENSG00000093009;ENSG00000099910;ENSG00000100297;ENSG00000100387;ENSG00000100479;ENSG00000103342;ENSG00000104738;ENSG00000114107;ENSG00000114126;ENSG00000115942;ENSG00000117748;ENSG00000118762;ENSG00000120539;ENSG00000125885;ENSG00000126215;ENSG00000127452;ENSG00000127564;ENSG00000129474…	NA	NA	NA	NA	NA	NA
GO:0006457	protein folding	209	NA	NA	NA	NA	NA	NA	27	14.2201	1.89872	0.00097516	0.0165777	ENSG00000090273;ENSG00000100380;ENSG00000103423;ENSG00000104852;ENSG00000105185;ENSG00000113013;ENSG00000114450;ENSG00000115484;ENSG00000117899;ENSG00000123131;ENSG00000123349;ENSG00000126602;ENSG00000127463;ENSG00000136731;ENSG00000144381;ENSG00000146731;ENSG00000151092;ENSG00000156261;ENSG00000160049;ENSG00000163468;ENSG00000164070;ENSG00000166855;ENSG00000170946;ENSG00000171960;ENSG00000196262…	NA	NA	NA	NA	NA	NA
GO:0045930	negative regulation of mitotic cell cycle	256	NA	NA	NA	NA	NA	NA	33	17.4179	1.8946	0.000294653	0.00544467	ENSG00000075131;ENSG00000080986;ENSG00000099910;ENSG00000100387;ENSG00000104228;ENSG00000114126;ENSG00000115966;ENSG00000117748;ENSG00000118762;ENSG00000126215;ENSG00000135679;ENSG00000136273;ENSG00000138035;ENSG00000140464;ENSG00000141198;ENSG00000141510;ENSG00000144580;ENSG00000149311;ENSG00000149554;ENSG00000159593;ENSG00000161010;ENSG00000164109;ENSG00000166483;ENSG00000168411;ENSG00000170242…	NA	NA	NA	NA	NA	NA
GO:0016458	gene silencing	202	NA	NA	NA	NA	NA	NA	26	13.7438	1.89176	0.00126583	0.020301	ENSG00000055917;ENSG00000070756;ENSG00000071655;ENSG00000080345;ENSG00000093009;ENSG00000096717;ENSG00000100201;ENSG00000114416;ENSG00000117751;ENSG00000119969;ENSG00000124571;ENSG00000126070;ENSG00000126934;ENSG00000129474;ENSG00000130816;ENSG00000134644;ENSG00000135829;ENSG00000141510;ENSG00000144580;ENSG00000144791;ENSG00000153147;ENSG00000168002;ENSG00000173933;ENSG00000180228;ENSG00000182973…	NA	NA	NA	NA	NA	NA
GO:0006520	cellular amino acid metabolic process	318	NA	NA	NA	NA	NA	NA	38	21.6363	1.75631	0.000496235	0.00860816	ENSG00000008311;ENSG00000035687;ENSG00000037757;ENSG00000067704;ENSG00000090861;ENSG00000093010;ENSG00000101444;ENSG00000103064;ENSG00000104835;ENSG00000105607;ENSG00000106305;ENSG00000115419;ENSG00000116761;ENSG00000116984;ENSG00000119689;ENSG00000119711;ENSG00000123131;ENSG00000128309;ENSG00000129521;ENSG00000130348;ENSG00000132199;ENSG00000133706;ENSG00000134684;ENSG00000138777;ENSG00000139631…	NA	NA	NA	NA	NA	NA
GO:0031503	protein-containing complex localization	279	NA	NA	NA	NA	NA	NA	33	18.9828	1.73842	0.00134361	0.0207648	ENSG00000030066;ENSG00000069248;ENSG00000082898;ENSG00000083312;ENSG00000089685;ENSG00000100296;ENSG00000105948;ENSG00000110713;ENSG00000112081;ENSG00000113569;ENSG00000116350;ENSG00000116903;ENSG00000120253;ENSG00000124789;ENSG00000125450;ENSG00000125755;ENSG00000128581;ENSG00000132604;ENSG00000136243;ENSG00000136709;ENSG00000139496;ENSG00000149311;ENSG00000151247;ENSG00000155561;ENSG00000160679…	NA	NA	NA	NA	NA	NA
GO:0000209	protein polyubiquitination	255	NA	NA	NA	NA	NA	NA	30	17.3499	1.72912	0.0023577	0.0351587	ENSG00000001629;ENSG00000004897;ENSG00000009335;ENSG00000085382;ENSG00000087448;ENSG00000089053;ENSG00000100387;ENSG00000101695;ENSG00000101966;ENSG00000112234;ENSG00000118420;ENSG00000119402;ENSG00000124208;ENSG00000124226;ENSG00000127452;ENSG00000163840;ENSG00000166233;ENSG00000169871;ENSG00000170633;ENSG00000172009;ENSG00000173273;ENSG00000173821;ENSG00000175931;ENSG00000177479;ENSG00000177889…	NA	NA	NA	NA	NA	NA
GO:1901987	regulation of cell cycle phase transition	385	NA	NA	NA	NA	NA	NA	44	26.1949	1.67972	0.000491585	0.00860816	ENSG00000004897;ENSG00000072864;ENSG00000080986;ENSG00000089053;ENSG00000093009;ENSG00000099910;ENSG00000100387;ENSG00000105393;ENSG00000114107;ENSG00000114126;ENSG00000117748;ENSG00000118762;ENSG00000126215;ENSG00000135679;ENSG00000136273;ENSG00000137814;ENSG00000138594;ENSG00000140464;ENSG00000141510;ENSG00000144580;ENSG00000148019;ENSG00000149311;ENSG00000149554;ENSG00000155858;ENSG00000159593…	NA	NA	NA	NA	NA	NA
GO:0007059	chromosome segregation	312	NA	NA	NA	NA	NA	NA	35	21.2281	1.64876	0.00242903	0.0355978	ENSG00000004897;ENSG00000013810;ENSG00000055917;ENSG00000072864;ENSG00000080986;ENSG00000089053;ENSG00000089685;ENSG00000096063;ENSG00000099910;ENSG00000109805;ENSG00000120253;ENSG00000121152;ENSG00000121579;ENSG00000121892;ENSG00000125459;ENSG00000126215;ENSG00000134644;ENSG00000137812;ENSG00000141696;ENSG00000143442;ENSG00000144554;ENSG00000149311;ENSG00000149636;ENSG00000154839;ENSG00000164109…	NA	NA	NA	NA	NA	NA
GO:0000002	mitochondrial genome maintenance	29	NA	NA	NA	NA	NA	NA	11	1.97312	5.57492	1.51652e-06	4.77422e-05	ENSG00000068305;ENSG00000103423;ENSG00000107815;ENSG00000115204;ENSG00000125459;ENSG00000125871;ENSG00000138346;ENSG00000171612;ENSG00000177302;ENSG00000196365;ENSG00000256525	NA	NA	NA	NA	NA	NA
GO:0002181	cytoplasmic translation	91	NA	NA	NA	NA	NA	NA	23	6.19152	3.71476	2.70459e-08	1.27717e-06	ENSG00000063046;ENSG00000071082;ENSG00000090861;ENSG00000100129;ENSG00000103342;ENSG00000104408;ENSG00000107581;ENSG00000130741;ENSG00000132478;ENSG00000135829;ENSG00000139726;ENSG00000142541;ENSG00000149100;ENSG00000156482;ENSG00000170946;ENSG00000173933;ENSG00000174748;ENSG00000178982;ENSG00000198492;ENSG00000198755;ENSG00000198918;ENSG00000213741;ENSG00000241343	NA	NA	NA	NA	NA	NA
GO:0006301	postreplication repair	51	NA	NA	NA	NA	NA	NA	12	3.46997	3.45824	0.000122781	0.00254546	ENSG00000009413;ENSG00000049541;ENSG00000100479;ENSG00000117748;ENSG00000124208;ENSG00000130997;ENSG00000136709;ENSG00000163918;ENSG00000166803;ENSG00000170734;ENSG00000177889;ENSG00000182446	NA	NA	NA	NA	NA	NA
GO:0034502	protein localization to chromosome	81	NA	NA	NA	NA	NA	NA	19	5.51114	3.44756	1.49296e-06	4.77422e-05	ENSG00000080986;ENSG00000115484;ENSG00000117748;ENSG00000125885;ENSG00000130119;ENSG00000132604;ENSG00000137812;ENSG00000139618;ENSG00000146731;ENSG00000156261;ENSG00000161010;ENSG00000163468;ENSG00000163938;ENSG00000164808;ENSG00000167842;ENSG00000172167;ENSG00000173273;ENSG00000175054;ENSG00000181555	NA	NA	NA	NA	NA	NA
GO:0006353	DNA-templated transcription, termination	73	NA	NA	NA	NA	NA	NA	16	4.96683	3.22137	2.47671e-05	0.00063794	ENSG00000068654;ENSG00000100028;ENSG00000101138;ENSG00000107290;ENSG00000111358;ENSG00000116830;ENSG00000125630;ENSG00000125755;ENSG00000135829;ENSG00000136709;ENSG00000137054;ENSG00000145736;ENSG00000155858;ENSG00000165494;ENSG00000166012;ENSG00000205571	NA	NA	NA	NA	NA	NA
GO:0071166	ribonucleoprotein complex localization	128	NA	NA	NA	NA	NA	NA	24	8.70896	2.75578	4.83954e-06	0.00013712	ENSG00000030066;ENSG00000069248;ENSG00000082898;ENSG00000100296;ENSG00000110713;ENSG00000112081;ENSG00000113569;ENSG00000116350;ENSG00000120253;ENSG00000124789;ENSG00000125450;ENSG00000125755;ENSG00000136243;ENSG00000136709;ENSG00000139496;ENSG00000151247;ENSG00000155561;ENSG00000160679;ENSG00000162385;ENSG00000168028;ENSG00000181163;ENSG00000181555;ENSG00000184575;ENSG00000198563	NA	NA	NA	NA	NA	NA
GO:0032200	telomere organization	146	NA	NA	NA	NA	NA	NA	27	9.93365	2.71803	1.66362e-06	5.05029e-05	ENSG00000014138;ENSG00000049541;ENSG00000080345;ENSG00000092199;ENSG00000115484;ENSG00000117748;ENSG00000126215;ENSG00000129566;ENSG00000130119;ENSG00000132604;ENSG00000136273;ENSG00000138346;ENSG00000139618;ENSG00000140464;ENSG00000146731;ENSG00000149311;ENSG00000152457;ENSG00000156261;ENSG00000163468;ENSG00000163918;ENSG00000163938;ENSG00000173273;ENSG00000174371;ENSG00000175054;ENSG00000196419…	NA	NA	NA	NA	NA	NA
GO:0006302	double-strand break repair	218	NA	NA	NA	NA	NA	NA	40	14.8324	2.69679	7.04968e-09	3.52484e-07	ENSG00000002016;ENSG00000069275;ENSG00000080345;ENSG00000093009;ENSG00000101347;ENSG00000105393;ENSG00000107290;ENSG00000117748;ENSG00000122678;ENSG00000125843;ENSG00000125885;ENSG00000126215;ENSG00000127311;ENSG00000127423;ENSG00000130997;ENSG00000134758;ENSG00000136273;ENSG00000138346;ENSG00000138496;ENSG00000139618;ENSG00000140464;ENSG00000147536;ENSG00000149311;ENSG00000149554;ENSG00000152457…	NA	NA	NA	NA	NA	NA
GO:0000726	non-recombinational repair	81	NA	NA	NA	NA	NA	NA	14	5.51114	2.54031	0.0010423	0.0173717	ENSG00000002016;ENSG00000080345;ENSG00000105393;ENSG00000122678;ENSG00000127423;ENSG00000134758;ENSG00000138496;ENSG00000149311;ENSG00000152457;ENSG00000161010;ENSG00000163840;ENSG00000177889;ENSG00000196419;ENSG00000198887	NA	NA	NA	NA	NA	NA
GO:2001020	regulation of response to DNA damage stimulus	203	NA	NA	NA	NA	NA	NA	33	13.8119	2.38925	2.50986e-06	7.35648e-05	ENSG00000002016;ENSG00000080345;ENSG00000096717;ENSG00000100296;ENSG00000105393;ENSG00000114904;ENSG00000117748;ENSG00000124208;ENSG00000127311;ENSG00000127423;ENSG00000132604;ENSG00000133112;ENSG00000135679;ENSG00000135829;ENSG00000138496;ENSG00000140464;ENSG00000149311;ENSG00000149554;ENSG00000161010;ENSG00000162607;ENSG00000163840;ENSG00000164808;ENSG00000168411;ENSG00000170242;ENSG00000170734…	NA	NA	NA	NA	NA	NA
GO:1903311	regulation of mRNA metabolic process	266	NA	NA	NA	NA	NA	NA	42	18.0983	2.32066	2.52982e-07	9.77431e-06	ENSG00000003756;ENSG00000055917;ENSG00000070495;ENSG00000070756;ENSG00000075856;ENSG00000077348;ENSG00000082898;ENSG00000083312;ENSG00000092199;ENSG00000096063;ENSG00000099783;ENSG00000100201;ENSG00000100722;ENSG00000104824;ENSG00000104852;ENSG00000107371;ENSG00000110713;ENSG00000111605;ENSG00000112081;ENSG00000114416;ENSG00000116001;ENSG00000116350;ENSG00000120948;ENSG00000122692;ENSG00000127804…	NA	NA	NA	NA	NA	NA
GO:0031123	RNA 3'-end processing	141	NA	NA	NA	NA	NA	NA	22	9.59346	2.29323	0.000211066	0.00398681	ENSG00000070756;ENSG00000077348;ENSG00000100296;ENSG00000100722;ENSG00000101138;ENSG00000107371;ENSG00000107951;ENSG00000111605;ENSG00000112081;ENSG00000116350;ENSG00000125755;ENSG00000127054;ENSG00000130713;ENSG00000132463;ENSG00000136709;ENSG00000138035;ENSG00000155858;ENSG00000160679;ENSG00000162385;ENSG00000165494;ENSG00000168028;ENSG00000198563	NA	NA	NA	NA	NA	NA
GO:0006289	nucleotide-excision repair	110	NA	NA	NA	NA	NA	NA	17	7.48426	2.27143	0.00118666	0.0193973	ENSG00000002016;ENSG00000014824;ENSG00000049541;ENSG00000066427;ENSG00000096717;ENSG00000100387;ENSG00000111358;ENSG00000117748;ENSG00000136273;ENSG00000139618;ENSG00000140398;ENSG00000141510;ENSG00000145736;ENSG00000145736;ENSG00000163918;ENSG00000166200;ENSG00000168002;ENSG00000183474	NA	NA	NA	NA	NA	NA
GO:0071897	DNA biosynthetic process	188	NA	NA	NA	NA	NA	NA	28	12.7913	2.18899	7.20407e-05	0.00157012	ENSG00000009413;ENSG00000014138;ENSG00000049541;ENSG00000092199;ENSG00000096717;ENSG00000100479;ENSG00000115484;ENSG00000117748;ENSG00000122678;ENSG00000129566;ENSG00000130119;ENSG00000130997;ENSG00000132604;ENSG00000141198;ENSG00000141510;ENSG00000146731;ENSG00000149311;ENSG00000156261;ENSG00000163468;ENSG00000163918;ENSG00000166803;ENSG00000170734;ENSG00000173273;ENSG00000175054;ENSG00000182446…	NA	NA	NA	NA	NA	NA
GO:0016482	cytosolic transport	157	NA	NA	NA	NA	NA	NA	23	10.6821	2.15314	0.000392949	0.00710653	ENSG00000008294;ENSG00000028528;ENSG00000036054;ENSG00000054523;ENSG00000061987;ENSG00000067208;ENSG00000089006;ENSG00000100083;ENSG00000111237;ENSG00000124222;ENSG00000126934;ENSG00000129250;ENSG00000131381;ENSG00000141252;ENSG00000144566;ENSG00000151532;ENSG00000168172;ENSG00000170310;ENSG00000172661;ENSG00000175931;ENSG00000204070;ENSG00000204713;ENSG00000213853	NA	NA	NA	NA	NA	NA
GO:0006414	translational elongation	132	NA	NA	NA	NA	NA	NA	19	8.98111	2.11555	0.00150447	0.0228357	ENSG00000048544;ENSG00000090861;ENSG00000103319;ENSG00000112996;ENSG00000114686;ENSG00000115364;ENSG00000116898;ENSG00000130312;ENSG00000131368;ENSG00000132676;ENSG00000143742;ENSG00000144029;ENSG00000170946;ENSG00000180992;ENSG00000181991;ENSG00000182180;ENSG00000185414;ENSG00000197345;ENSG00000198015	NA	NA	NA	NA	NA	NA
GO:0000075	cell cycle checkpoint	216	NA	NA	NA	NA	NA	NA	31	14.6964	2.10937	6.2214e-05	0.00142924	ENSG00000075131;ENSG00000080986;ENSG00000093009;ENSG00000096401;ENSG00000099910;ENSG00000100296;ENSG00000105393;ENSG00000113456;ENSG00000114126;ENSG00000115966;ENSG00000117748;ENSG00000126215;ENSG00000135679;ENSG00000136273;ENSG00000138346;ENSG00000140464;ENSG00000141510;ENSG00000144580;ENSG00000149311;ENSG00000149554;ENSG00000159593;ENSG00000161010;ENSG00000164109;ENSG00000166483;ENSG00000168411…	NA	NA	NA	NA	NA	NA
GO:0051052	regulation of DNA metabolic process	405	NA	NA	NA	NA	NA	NA	58	27.5557	2.10483	4.97908e-08	2.22748e-06	ENSG00000002016;ENSG00000006634;ENSG00000049541;ENSG00000069275;ENSG00000071655;ENSG00000075131;ENSG00000076248;ENSG00000080345;ENSG00000092199;ENSG00000096717;ENSG00000105393;ENSG00000107371;ENSG00000114030;ENSG00000115484;ENSG00000117748;ENSG00000120868;ENSG00000121892;ENSG00000124208;ENSG00000127311;ENSG00000127423;ENSG00000130119;ENSG00000130816;ENSG00000132604;ENSG00000135829;ENSG00000135913…	NA	NA	NA	NA	NA	NA
GO:0017038	protein import	211	NA	NA	NA	NA	NA	NA	30	14.3562	2.08969	9.66189e-05	0.00205315	ENSG00000005893;ENSG00000065150;ENSG00000069248;ENSG00000083312;ENSG00000088888;ENSG00000096717;ENSG00000102910;ENSG00000105185;ENSG00000105197;ENSG00000105576;ENSG00000110713;ENSG00000113569;ENSG00000114030;ENSG00000120948;ENSG00000124207;ENSG00000124789;ENSG00000125450;ENSG00000125691;ENSG00000129197;ENSG00000130204;ENSG00000134375;ENSG00000139496;ENSG00000140464;ENSG00000142444;ENSG00000144381…	NA	NA	NA	NA	NA	NA
GO:0040029	regulation of gene expression, epigenetic	258	NA	NA	NA	NA	NA	NA	36	17.554	2.05082	3.0478e-05	0.00071962	ENSG00000009954;ENSG00000054267;ENSG00000055917;ENSG00000068654;ENSG00000071655;ENSG00000080345;ENSG00000093009;ENSG00000096717;ENSG00000114416;ENSG00000117751;ENSG00000119969;ENSG00000124571;ENSG00000125630;ENSG00000126070;ENSG00000126934;ENSG00000129474;ENSG00000130816;ENSG00000134644;ENSG00000135829;ENSG00000137054;ENSG00000141510;ENSG00000144791;ENSG00000149554;ENSG00000153147;ENSG00000156374…	NA	NA	NA	NA	NA	NA
GO:0044843	cell cycle G1/S phase transition	247	NA	NA	NA	NA	NA	NA	34	16.8056	2.02314	6.61976e-05	0.00148074	ENSG00000006634;ENSG00000014138;ENSG00000093009;ENSG00000100297;ENSG00000100479;ENSG00000103342;ENSG00000104738;ENSG00000114126;ENSG00000115942;ENSG00000117748;ENSG00000118762;ENSG00000125885;ENSG00000132780;ENSG00000135679;ENSG00000135913;ENSG00000140464;ENSG00000141510;ENSG00000144580;ENSG00000149311;ENSG00000151247;ENSG00000155858;ENSG00000166266;ENSG00000166483;ENSG00000168411;ENSG00000171862…	NA	NA	NA	NA	NA	NA
GO:0010948	negative regulation of cell cycle process	278	NA	NA	NA	NA	NA	NA	38	18.9148	2.00901	2.95242e-05	0.000717016	ENSG00000080986;ENSG00000094916;ENSG00000099910;ENSG00000100387;ENSG00000105393;ENSG00000113456;ENSG00000114126;ENSG00000117748;ENSG00000118762;ENSG00000120868;ENSG00000125691;ENSG00000126215;ENSG00000132604;ENSG00000135679;ENSG00000136273;ENSG00000140464;ENSG00000141198;ENSG00000141510;ENSG00000144580;ENSG00000149311;ENSG00000149554;ENSG00000156374;ENSG00000159593;ENSG00000161010;ENSG00000162521…	NA	NA	NA	NA	NA	NA
GO:0061842	microtubule organizing center localization	25	NA	NA	NA	NA	NA	NA	NA	NA	NA	NA	NA	NA	6	1.35231	4.43685	0.00179476	0.0478445	ENSG00000066279;ENSG00000072864;ENSG00000121957;ENSG00000127914;ENSG00000164828;ENSG00000166579
GO:0031023	microtubule organizing center organization	134	NA	NA	NA	NA	NA	NA	NA	NA	NA	NA	NA	NA	19	7.24839	2.62127	0.000107154	0.00695868	ENSG00000072864;ENSG00000092036;ENSG00000101624;ENSG00000126756;ENSG00000129007;ENSG00000130695;ENSG00000131437;ENSG00000137814;ENSG00000139618;ENSG00000140025;ENSG00000147316;ENSG00000149554;ENSG00000166579;ENSG00000168036;ENSG00000178184;ENSG00000181163;ENSG00000196584;ENSG00000213024;ENSG00000248643
GO:0055088	lipid homeostasis	125	NA	NA	NA	NA	NA	NA	NA	NA	NA	NA	NA	NA	16	6.76156	2.36632	0.00114587	0.0339032	ENSG00000012504;ENSG00000057252;ENSG00000073060;ENSG00000100219;ENSG00000100344;ENSG00000101076;ENSG00000116833;ENSG00000120053;ENSG00000123353;ENSG00000132356;ENSG00000153291;ENSG00000161533;ENSG00000161944;ENSG00000162337;ENSG00000197296;ENSG00000198911
GO:0007006	mitochondrial membrane organization	126	NA	NA	NA	NA	NA	NA	NA	NA	NA	NA	NA	NA	16	6.81565	2.34754	0.00124835	0.0353699	ENSG00000007923;ENSG00000051620;ENSG00000064012;ENSG00000101412;ENSG00000105185;ENSG00000105197;ENSG00000114126;ENSG00000125375;ENSG00000136448;ENSG00000142444;ENSG00000156968;ENSG00000163626;ENSG00000171109;ENSG00000182372;ENSG00000197912;ENSG00000241468
GO:0070585	protein localization to mitochondrion	137	NA	NA	NA	NA	NA	NA	NA	NA	NA	NA	NA	NA	17	7.41067	2.29399	0.0011567	0.0339032	ENSG00000064012;ENSG00000086061;ENSG00000101412;ENSG00000105185;ENSG00000105197;ENSG00000114126;ENSG00000130204;ENSG00000132356;ENSG00000134375;ENSG00000136448;ENSG00000142444;ENSG00000144381;ENSG00000148950;ENSG00000163626;ENSG00000177479;ENSG00000198911;ENSG00000217930
GO:0031647	regulation of protein stability	267	NA	NA	NA	NA	NA	NA	NA	NA	NA	NA	NA	NA	29	14.4427	2.00794	0.000276598	0.0117554	ENSG00000005893;ENSG00000064601;ENSG00000100219;ENSG00000101109;ENSG00000114316;ENSG00000115977;ENSG00000117758;ENSG00000122406;ENSG00000123159;ENSG00000125691;ENSG00000125885;ENSG00000125912;ENSG00000130119;ENSG00000132846;ENSG00000134086;ENSG00000135679;ENSG00000136152;ENSG00000144381;ENSG00000145362;ENSG00000146731;ENSG00000148396;ENSG00000148584;ENSG00000161944;ENSG00000163162;ENSG00000179218…

## Sheet: Edited_gene_sets_comparison_CC
geneSet	BiologicalProcess	size	overlap_common	expect_common	enrichmentRatio_common	pValue_common	FDR_common	userId_common	overlap_HEK293T	expect_HEK293T	enrichmentRatio_HEK293T	pValue_HEK293T	FDR_HEK293T	userId_HEK293T	overlap_Huh7.5	expect_Huh7.5	enrichmentRatio_Huh7.5	pValue_Huh7.5	FDR_Huh7.5	userId_Huh7.5
GO:0005840	ribosome	229	28	8.75956	3.19651	4.706e-08	2.90342e-06	ENSG00000008988;ENSG00000055332;ENSG00000089154;ENSG00000105372;ENSG00000108107;ENSG00000110700;ENSG00000112996;ENSG00000116898;ENSG00000122406;ENSG00000125691;ENSG00000131368;ENSG00000132676;ENSG00000142541;ENSG00000145425;ENSG00000145592;ENSG00000146223;ENSG00000156482;ENSG00000166441;ENSG00000168028;ENSG00000170889;ENSG00000178694;ENSG00000182180;ENSG00000185414;ENSG00000188846;ENSG00000197756…	51	17.9514	2.841	4.51339e-12	7.76303e-10	ENSG00000008988;ENSG00000048544;ENSG00000055332;ENSG00000071082;ENSG00000089154;ENSG00000101181;ENSG00000105372;ENSG00000108107;ENSG00000108256;ENSG00000109475;ENSG00000110700;ENSG00000112996;ENSG00000114686;ENSG00000115364;ENSG00000116251;ENSG00000116898;ENSG00000118181;ENSG00000122406;ENSG00000124614;ENSG00000125691;ENSG00000130312;ENSG00000131368;ENSG00000131469;ENSG00000132676;ENSG00000134419…	31	13.8333	2.24097	1.87479e-05	0.00161232	ENSG00000008988;ENSG00000055332;ENSG00000089154;ENSG00000102317;ENSG00000105372;ENSG00000108107;ENSG00000110700;ENSG00000112996;ENSG00000116898;ENSG00000122406;ENSG00000125691;ENSG00000131368;ENSG00000132676;ENSG00000142541;ENSG00000145425;ENSG00000145592;ENSG00000146223;ENSG00000156482;ENSG00000161813;ENSG00000166441;ENSG00000168028;ENSG00000168724;ENSG00000170889;ENSG00000178694;ENSG00000182180…
GO:0044445	cytosolic part	244	29	9.33333	3.10714	5.0641e-08	2.90342e-06	ENSG00000003400;ENSG00000003402;ENSG00000008988;ENSG00000055332;ENSG00000064012;ENSG00000105372;ENSG00000105483;ENSG00000106546;ENSG00000108107;ENSG00000110700;ENSG00000120868;ENSG00000122406;ENSG00000125691;ENSG00000142541;ENSG00000145425;ENSG00000145592;ENSG00000146223;ENSG00000146731;ENSG00000156482;ENSG00000166441;ENSG00000168028;ENSG00000170889;ENSG00000188846;ENSG00000197756;ENSG00000197860…	46	19.1273	2.40494	1.57236e-08	9.01486e-07	ENSG00000003400;ENSG00000003402;ENSG00000008988;ENSG00000013275;ENSG00000055332;ENSG00000064012;ENSG00000071082;ENSG00000100099;ENSG00000100519;ENSG00000105372;ENSG00000105483;ENSG00000106546;ENSG00000108107;ENSG00000109475;ENSG00000110700;ENSG00000115484;ENSG00000116251;ENSG00000118181;ENSG00000120868;ENSG00000122406;ENSG00000124614;ENSG00000125691;ENSG00000131469;ENSG00000134419;ENSG00000142541…	31	14.7394	2.10321	6.49581e-05	0.0027932	ENSG00000003400;ENSG00000003402;ENSG00000008988;ENSG00000055332;ENSG00000064012;ENSG00000105372;ENSG00000105483;ENSG00000106546;ENSG00000108107;ENSG00000110700;ENSG00000117758;ENSG00000120868;ENSG00000122406;ENSG00000125691;ENSG00000142541;ENSG00000145425;ENSG00000145592;ENSG00000146223;ENSG00000146731;ENSG00000156482;ENSG00000161813;ENSG00000166441;ENSG00000168028;ENSG00000170889;ENSG00000188846…
GO:0005743	mitochondrial inner membrane	455	45	17.4044	2.58556	3.51514e-09	6.04604e-07	ENSG00000007923;ENSG00000023228;ENSG00000050393;ENSG00000075415;ENSG00000087157;ENSG00000087299;ENSG00000101247;ENSG00000101290;ENSG00000102967;ENSG00000105197;ENSG00000112996;ENSG00000115204;ENSG00000116898;ENSG00000122912;ENSG00000125375;ENSG00000126602;ENSG00000130204;ENSG00000131368;ENSG00000132676;ENSG00000133028;ENSG00000134375;ENSG00000142444;ENSG00000143252;ENSG00000144381;ENSG00000148950…	63	35.6677	1.76631	5.21843e-06	0.000112196	ENSG00000007923;ENSG00000011295;ENSG00000023228;ENSG00000048544;ENSG00000050393;ENSG00000050426;ENSG00000087157;ENSG00000087299;ENSG00000099795;ENSG00000101181;ENSG00000101290;ENSG00000102967;ENSG00000105197;ENSG00000109919;ENSG00000112996;ENSG00000114686;ENSG00000115204;ENSG00000115364;ENSG00000116898;ENSG00000122696;ENSG00000122912;ENSG00000125375;ENSG00000125454;ENSG00000126602;ENSG00000130204…	52	27.4853	1.89192	5.59279e-06	0.00096196	ENSG00000007923;ENSG00000023228;ENSG00000050393;ENSG00000075415;ENSG00000077713;ENSG00000087157;ENSG00000087299;ENSG00000101247;ENSG00000101290;ENSG00000102967;ENSG00000105197;ENSG00000112695;ENSG00000112996;ENSG00000115204;ENSG00000116898;ENSG00000122912;ENSG00000125375;ENSG00000126602;ENSG00000130204;ENSG00000131368;ENSG00000132676;ENSG00000133028;ENSG00000134375;ENSG00000142444;ENSG00000143252…
GO:0098687	chromosomal region	331	29	12.6612	2.29046	2.61173e-05	0.000898436	ENSG00000020922;ENSG00000072864;ENSG00000080345;ENSG00000085840;ENSG00000094916;ENSG00000100296;ENSG00000100401;ENSG00000102384;ENSG00000103510;ENSG00000104738;ENSG00000115942;ENSG00000119969;ENSG00000120253;ENSG00000120334;ENSG00000129534;ENSG00000129566;ENSG00000130816;ENSG00000137812;ENSG00000139618;ENSG00000149311;ENSG00000149554;ENSG00000149636;ENSG00000152457;ENSG00000153044;ENSG00000154839…	59	25.9472	2.27384	1.33654e-09	1.14942e-07	ENSG00000009954;ENSG00000030066;ENSG00000058272;ENSG00000069248;ENSG00000072864;ENSG00000080345;ENSG00000080986;ENSG00000082898;ENSG00000089685;ENSG00000094916;ENSG00000100162;ENSG00000100296;ENSG00000100297;ENSG00000100401;ENSG00000102384;ENSG00000103510;ENSG00000104738;ENSG00000107290;ENSG00000109805;ENSG00000110713;ENSG00000113712;ENSG00000115942;ENSG00000117748;ENSG00000119969;ENSG00000120253…	37	19.9948	1.85048	0.000202222	0.00686769	ENSG00000010803;ENSG00000020922;ENSG00000072864;ENSG00000080345;ENSG00000085840;ENSG00000094916;ENSG00000100296;ENSG00000100401;ENSG00000102384;ENSG00000103510;ENSG00000104738;ENSG00000115942;ENSG00000119969;ENSG00000120253;ENSG00000120334;ENSG00000129534;ENSG00000129566;ENSG00000130816;ENSG00000134057;ENSG00000137812;ENSG00000139618;ENSG00000143228;ENSG00000149311;ENSG00000149554;ENSG00000149636…
GO:0005759	mitochondrial matrix	462	32	17.6721	1.81076	0.000811435	0.0155074	ENSG00000023228;ENSG00000100890;ENSG00000104687;ENSG00000112096;ENSG00000112996;ENSG00000114054;ENSG00000116353;ENSG00000116898;ENSG00000117593;ENSG00000119711;ENSG00000124370;ENSG00000126602;ENSG00000128309;ENSG00000132463;ENSG00000132676;ENSG00000137992;ENSG00000144381;ENSG00000154079;ENSG00000165526;ENSG00000166855;ENSG00000167112;ENSG00000167985;ENSG00000172840;ENSG00000177192;ENSG00000178694…	70	36.2164	1.93283	4.60722e-08	1.58488e-06	ENSG00000008311;ENSG00000023228;ENSG00000043514;ENSG00000048544;ENSG00000062485;ENSG00000066427;ENSG00000067704;ENSG00000086189;ENSG00000100294;ENSG00000101181;ENSG00000103423;ENSG00000104687;ENSG00000104835;ENSG00000105607;ENSG00000107815;ENSG00000112096;ENSG00000112996;ENSG00000113013;ENSG00000114054;ENSG00000114686;ENSG00000115364;ENSG00000115419;ENSG00000116353;ENSG00000116898;ENSG00000119689…	47	27.9082	1.68409	0.000279499	0.00686769	ENSG00000023228;ENSG00000100890;ENSG00000104687;ENSG00000106246;ENSG00000111271;ENSG00000111275;ENSG00000112096;ENSG00000112996;ENSG00000114054;ENSG00000116353;ENSG00000116898;ENSG00000117593;ENSG00000119711;ENSG00000122687;ENSG00000124370;ENSG00000126602;ENSG00000128309;ENSG00000132463;ENSG00000132676;ENSG00000132837;ENSG00000134057;ENSG00000137992;ENSG00000139131;ENSG00000144381;ENSG00000145439…
GO:0000793	condensed chromosome	223	20	8.53005	2.34465	0.000346655	0.00851781	ENSG00000072864;ENSG00000080345;ENSG00000100401;ENSG00000113456;ENSG00000115942;ENSG00000120253;ENSG00000126070;ENSG00000129534;ENSG00000137812;ENSG00000139618;ENSG00000144554;ENSG00000149554;ENSG00000149636;ENSG00000153044;ENSG00000154839;ENSG00000161888;ENSG00000166295;ENSG00000166451;ENSG00000166847;ENSG00000180198	42	17.4811	2.4026	6.88972e-08	1.71847e-06	ENSG00000009954;ENSG00000069248;ENSG00000072864;ENSG00000080345;ENSG00000080986;ENSG00000089685;ENSG00000100162;ENSG00000100401;ENSG00000109805;ENSG00000113456;ENSG00000113712;ENSG00000115942;ENSG00000117748;ENSG00000120253;ENSG00000121152;ENSG00000125450;ENSG00000126070;ENSG00000129534;ENSG00000136273;ENSG00000137812;ENSG00000138095;ENSG00000139618;ENSG00000141696;ENSG00000144554;ENSG00000146918…	NA	NA	NA	NA	NA	NA
GO:0098798	mitochondrial protein complex	266	23	10.1749	2.26047	0.000218073	0.00625142	ENSG00000007923;ENSG00000023228;ENSG00000100890;ENSG00000105197;ENSG00000112996;ENSG00000116898;ENSG00000130204;ENSG00000132676;ENSG00000134375;ENSG00000137992;ENSG00000142444;ENSG00000143252;ENSG00000148950;ENSG00000151366;ENSG00000154079;ENSG00000160194;ENSG00000166855;ENSG00000178694;ENSG00000182180;ENSG00000183648;ENSG00000185414;ENSG00000197912;ENSG00000198015	36	20.8519	1.72646	0.000848695	0.0132705	ENSG00000007923;ENSG00000023228;ENSG00000048544;ENSG00000099795;ENSG00000101181;ENSG00000105197;ENSG00000112996;ENSG00000114686;ENSG00000115364;ENSG00000116898;ENSG00000130204;ENSG00000130312;ENSG00000132676;ENSG00000134375;ENSG00000137992;ENSG00000138035;ENSG00000138346;ENSG00000142444;ENSG00000144029;ENSG00000148950;ENSG00000151366;ENSG00000152256;ENSG00000154079;ENSG00000160194;ENSG00000166855…	NA	NA	NA	NA	NA	NA
GO:0044455	mitochondrial membrane part	229	23	8.75956	2.6257	2.17235e-05	0.000898436	ENSG00000007923;ENSG00000023228;ENSG00000050393;ENSG00000075415;ENSG00000087299;ENSG00000101247;ENSG00000105197;ENSG00000130204;ENSG00000133028;ENSG00000134375;ENSG00000142444;ENSG00000143252;ENSG00000144381;ENSG00000148950;ENSG00000151366;ENSG00000154079;ENSG00000160194;ENSG00000163626;ENSG00000166260;ENSG00000167113;ENSG00000183648;ENSG00000197912;ENSG00000213463	NA	NA	NA	NA	NA	NA	28	13.8333	2.0241	0.000278595	0.00686769	ENSG00000007923;ENSG00000023228;ENSG00000050393;ENSG00000075415;ENSG00000087299;ENSG00000101247;ENSG00000105197;ENSG00000112695;ENSG00000130204;ENSG00000133028;ENSG00000134375;ENSG00000142444;ENSG00000143252;ENSG00000144381;ENSG00000144559;ENSG00000148950;ENSG00000151366;ENSG00000154079;ENSG00000160194;ENSG00000163626;ENSG00000166260;ENSG00000167113;ENSG00000171109;ENSG00000183648;ENSG00000197912…
GO:0030684	preribosome	73	9	2.79235	3.22309	0.00177627	0.0305519	ENSG00000087269;ENSG00000108651;ENSG00000111615;ENSG00000119616;ENSG00000124541;ENSG00000138442;ENSG00000141076;ENSG00000151304;ENSG00000171490	NA	NA	NA	NA	NA	NA	NA	NA	NA	NA	NA	NA
GO:0031300	intrinsic component of organelle membrane	227	20	8.68306	2.30334	0.000436898	0.0093933	ENSG00000005893;ENSG00000007923;ENSG00000040487;ENSG00000050393;ENSG00000075415;ENSG00000087299;ENSG00000117620;ENSG00000130204;ENSG00000133028;ENSG00000134375;ENSG00000144566;ENSG00000154978;ENSG00000162928;ENSG00000163626;ENSG00000164828;ENSG00000166260;ENSG00000180776;ENSG00000197912;ENSG00000213463;ENSG00000215193	NA	NA	NA	NA	NA	NA	NA	NA	NA	NA	NA	NA
GO:0120114	Sm-like protein family complex	75	NA	NA	NA	NA	NA	NA	22	5.87928	3.74195	3.35537e-08	1.44281e-06	ENSG00000007392;ENSG00000060688;ENSG00000074201;ENSG00000075856;ENSG00000092208;ENSG00000100028;ENSG00000104852;ENSG00000108848;ENSG00000108883;ENSG00000117360;ENSG00000125743;ENSG00000130332;ENSG00000136875;ENSG00000141759;ENSG00000146963;ENSG00000152147;ENSG00000155858;ENSG00000168883;ENSG00000171960;ENSG00000189091;ENSG00000198563;ENSG00000205571	NA	NA	NA	NA	NA	NA
GO:0005849	mRNA cleavage factor complex	21	NA	NA	NA	NA	NA	NA	6	1.6462	3.64476	0.00444125	0.044935	ENSG00000101138;ENSG00000111605;ENSG00000113712;ENSG00000136709;ENSG00000143398;ENSG00000165494	NA	NA	NA	NA	NA	NA
GO:0005657	replication fork	69	NA	NA	NA	NA	NA	NA	15	5.40894	2.77319	0.000233929	0.00402358	ENSG00000009954;ENSG00000014138;ENSG00000049541;ENSG00000075131;ENSG00000093009;ENSG00000096401;ENSG00000117748;ENSG00000126215;ENSG00000127311;ENSG00000130816;ENSG00000147536;ENSG00000153147;ENSG00000163918;ENSG00000170734;ENSG00000196584	NA	NA	NA	NA	NA	NA
GO:0009295	nucleoid	43	NA	NA	NA	NA	NA	NA	9	3.37079	2.67	0.00533091	0.0487357	ENSG00000107815;ENSG00000113013;ENSG00000132463;ENSG00000137992;ENSG00000138095;ENSG00000138346;ENSG00000166855;ENSG00000196365;ENSG00000256525	NA	NA	NA	NA	NA	NA
GO:0005681	spliceosomal complex	176	NA	NA	NA	NA	NA	NA	36	13.7967	2.60932	6.99378e-08	1.71847e-06	ENSG00000003756;ENSG00000005436;ENSG00000007392;ENSG00000060688;ENSG00000070756;ENSG00000092199;ENSG00000092208;ENSG00000096401;ENSG00000099783;ENSG00000100028;ENSG00000104852;ENSG00000106344;ENSG00000106615;ENSG00000108848;ENSG00000108883;ENSG00000113593;ENSG00000116830;ENSG00000117360;ENSG00000117569;ENSG00000117751;ENSG00000122692;ENSG00000125743;ENSG00000130332;ENSG00000132680;ENSG00000135316…	NA	NA	NA	NA	NA	NA
GO:0015030	Cajal body	55	NA	NA	NA	NA	NA	NA	11	4.31148	2.55133	0.00314399	0.0360511	ENSG00000055044;ENSG00000075856;ENSG00000082898;ENSG00000108883;ENSG00000117360;ENSG00000128915;ENSG00000136875;ENSG00000145833;ENSG00000164902;ENSG00000166233;ENSG00000205571	NA	NA	NA	NA	NA	NA
GO:0090734	site of DNA damage	66	NA	NA	NA	NA	NA	NA	13	5.17377	2.51267	0.00159065	0.0202022	ENSG00000080345;ENSG00000094916;ENSG00000101347;ENSG00000115966;ENSG00000117748;ENSG00000127311;ENSG00000127423;ENSG00000134758;ENSG00000136273;ENSG00000138496;ENSG00000168411;ENSG00000170734;ENSG00000198887	NA	NA	NA	NA	NA	NA
GO:0005844	polysome	73	NA	NA	NA	NA	NA	NA	14	5.7225	2.44648	0.00139947	0.0200591	ENSG00000063046;ENSG00000071082;ENSG00000089154;ENSG00000108256;ENSG00000114416;ENSG00000132478;ENSG00000135829;ENSG00000138035;ENSG00000156482;ENSG00000185721;ENSG00000198755;ENSG00000198918;ENSG00000213741;ENSG00000241343	NA	NA	NA	NA	NA	NA
GO:0016605	PML body	99	NA	NA	NA	NA	NA	NA	17	7.76066	2.19054	0.00164437	0.0202022	ENSG00000094916;ENSG00000096717;ENSG00000104408;ENSG00000117748;ENSG00000118412;ENSG00000120798;ENSG00000129197;ENSG00000140464;ENSG00000141510;ENSG00000167657;ENSG00000168411;ENSG00000171862;ENSG00000175054;ENSG00000177302;ENSG00000183765;ENSG00000198887;ENSG00000204713	NA	NA	NA	NA	NA	NA
GO:0034399	nuclear periphery	133	NA	NA	NA	NA	NA	NA	20	10.4259	1.91829	0.00348192	0.0374306	ENSG00000015479;ENSG00000065150;ENSG00000066427;ENSG00000083312;ENSG00000096063;ENSG00000099783;ENSG00000103510;ENSG00000105576;ENSG00000110713;ENSG00000113368;ENSG00000121390;ENSG00000124789;ENSG00000129566;ENSG00000140464;ENSG00000141510;ENSG00000147140;ENSG00000155561;ENSG00000162664;ENSG00000184575;ENSG00000198563	NA	NA	NA	NA	NA	NA
GO:0016607	nuclear speck	383	NA	NA	NA	NA	NA	NA	53	30.0235	1.76528	3.01565e-05	0.000576324	ENSG00000010318;ENSG00000060688;ENSG00000074356;ENSG00000075292;ENSG00000075856;ENSG00000092094;ENSG00000092978;ENSG00000096401;ENSG00000100201;ENSG00000100211;ENSG00000100722;ENSG00000104852;ENSG00000105197;ENSG00000108848;ENSG00000108883;ENSG00000111605;ENSG00000112081;ENSG00000112234;ENSG00000113712;ENSG00000116350;ENSG00000116497;ENSG00000117360;ENSG00000117751;ENSG00000120948;ENSG00000121390…	NA	NA	NA	NA	NA	NA
GO:0005819	spindle	328	NA	NA	NA	NA	NA	NA	39	25.7121	1.5168	0.00564857	0.0487357	ENSG00000004897;ENSG00000013810;ENSG00000066279;ENSG00000067208;ENSG00000068028;ENSG00000072864;ENSG00000080345;ENSG00000087448;ENSG00000089685;ENSG00000099910;ENSG00000100401;ENSG00000112304;ENSG00000115760;ENSG00000118762;ENSG00000121289;ENSG00000121957;ENSG00000125450;ENSG00000127423;ENSG00000128159;ENSG00000129680;ENSG00000131242;ENSG00000133112;ENSG00000136108;ENSG00000137814;ENSG00000138182…	NA	NA	NA	NA	NA	NA
GO:0005635	nuclear envelope	455	NA	NA	NA	NA	NA	NA	51	35.6677	1.42987	0.00566695	0.0487357	ENSG00000015479;ENSG00000030066;ENSG00000055917;ENSG00000065150;ENSG00000069248;ENSG00000074696;ENSG00000080345;ENSG00000082898;ENSG00000083312;ENSG00000094916;ENSG00000096717;ENSG00000100401;ENSG00000105576;ENSG00000110713;ENSG00000113368;ENSG00000113569;ENSG00000114030;ENSG00000114107;ENSG00000115364;ENSG00000115998;ENSG00000120253;ENSG00000120802;ENSG00000124207;ENSG00000124789;ENSG00000125450…	NA	NA	NA	NA	NA	NA
GO:0048475	coated membrane	97	NA	NA	NA	NA	NA	NA	NA	NA	NA	NA	NA	NA	17	5.85951	2.90126	6.13496e-05	0.0027932	ENSG00000006715;ENSG00000100478;ENSG00000105669;ENSG00000125843;ENSG00000129354;ENSG00000138674;ENSG00000141367;ENSG00000149182;ENSG00000152056;ENSG00000157020;ENSG00000157823;ENSG00000166557;ENSG00000196961;ENSG00000242247;ENSG00000250021;ENSG00000254470;ENSG00000275066

## Sheet: Edited_gene_sets_comparison_MF
geneSet	BiologicalProcess	size	overlap_common	expect_common	enrichmentRatio_common	pValue_common	FDR_common	userId_common	overlap_HEK293T	expect_HEK293T	enrichmentRatio_HEK293T	pValue_HEK293T	FDR_HEK293T	userId_HEK293T	overlap_Huh7.5	expect_Huh7.5	enrichmentRatio_Huh7.5	pValue_Huh7.5	FDR_Huh7.5	userId_Huh7.5
GO:0003735	structural constituent of ribosome	156	25	4.93406	5.06682	1.88791e-11	5.32391e-09	ENSG00000008988;ENSG00000105372;ENSG00000108107;ENSG00000110700;ENSG00000112996;ENSG00000116898;ENSG00000122406;ENSG00000125691;ENSG00000131368;ENSG00000132676;ENSG00000142541;ENSG00000145425;ENSG00000145592;ENSG00000146223;ENSG00000156482;ENSG00000166441;ENSG00000168028;ENSG00000170889;ENSG00000182180;ENSG00000185414;ENSG00000188846;ENSG00000197756;ENSG00000198015;ENSG00000198242;ENSG00000241343	41	10.5784	3.87581	1.9762e-14	5.57288e-12	ENSG00000008988;ENSG00000071082;ENSG00000105372;ENSG00000108107;ENSG00000109475;ENSG00000110700;ENSG00000112996;ENSG00000114686;ENSG00000115364;ENSG00000116251;ENSG00000116898;ENSG00000122406;ENSG00000124614;ENSG00000125691;ENSG00000130312;ENSG00000131368;ENSG00000131469;ENSG00000132676;ENSG00000134419;ENSG00000142541;ENSG00000144029;ENSG00000145425;ENSG00000145592;ENSG00000146223;ENSG00000156482…	25	8.13042	3.07487	4.70326e-07	0.000132632	ENSG00000008988;ENSG00000105372;ENSG00000108107;ENSG00000110700;ENSG00000112996;ENSG00000116898;ENSG00000122406;ENSG00000125691;ENSG00000131368;ENSG00000132676;ENSG00000142541;ENSG00000145425;ENSG00000145592;ENSG00000146223;ENSG00000156482;ENSG00000166441;ENSG00000168028;ENSG00000170889;ENSG00000182180;ENSG00000185414;ENSG00000188846;ENSG00000197756;ENSG00000198015;ENSG00000198242;ENSG00000241343
GO:0043021	ribonucleoprotein complex binding	129	14	4.08009	3.4313	5.68085e-05	0.00534	ENSG00000058262;ENSG00000076248;ENSG00000089154;ENSG00000094916;ENSG00000100028;ENSG00000105197;ENSG00000135679;ENSG00000138442;ENSG00000143742;ENSG00000167088;ENSG00000168028;ENSG00000171960;ENSG00000178982;ENSG00000181163	19	8.74754	2.17204	0.00108351	0.0179735	ENSG00000050426;ENSG00000058262;ENSG00000063046;ENSG00000076248;ENSG00000089154;ENSG00000094916;ENSG00000100028;ENSG00000105197;ENSG00000111605;ENSG00000132478;ENSG00000135679;ENSG00000135829;ENSG00000138442;ENSG00000143742;ENSG00000168028;ENSG00000171960;ENSG00000178605;ENSG00000178982;ENSG00000181163	18	6.72323	2.67728	0.000122725	0.0086521	ENSG00000058262;ENSG00000076248;ENSG00000078747;ENSG00000089154;ENSG00000094916;ENSG00000100028;ENSG00000102317;ENSG00000105197;ENSG00000135679;ENSG00000138442;ENSG00000143742;ENSG00000148187;ENSG00000167088;ENSG00000168028;ENSG00000171960;ENSG00000178982;ENSG00000181163;ENSG00000242372
GO:0051082	unfolded protein binding	118	12	3.73217	3.21528	0.000351596	0.0247875	ENSG00000090273;ENSG00000123349;ENSG00000126602;ENSG00000136731;ENSG00000144381;ENSG00000146731;ENSG00000155393;ENSG00000166855;ENSG00000171960;ENSG00000181163;ENSG00000196262;ENSG00000197912	21	8.00163	2.62447	3.94163e-05	0.00123504	ENSG00000090273;ENSG00000100380;ENSG00000102595;ENSG00000103423;ENSG00000113013;ENSG00000115484;ENSG00000123349;ENSG00000126602;ENSG00000136731;ENSG00000144381;ENSG00000146731;ENSG00000155393;ENSG00000156261;ENSG00000159259;ENSG00000163468;ENSG00000166855;ENSG00000171960;ENSG00000181163;ENSG00000196262;ENSG00000197912;ENSG00000205531	16	6.14993	2.60166	0.000400396	0.0225823	ENSG00000086061;ENSG00000090273;ENSG00000123349;ENSG00000126602;ENSG00000136731;ENSG00000144381;ENSG00000146731;ENSG00000155393;ENSG00000166855;ENSG00000171960;ENSG00000179218;ENSG00000181163;ENSG00000188529;ENSG00000196262;ENSG00000197912;ENSG00000231925
GO:0140098	catalytic activity, acting on RNA	350	33	11.07	2.98103	1.94643e-08	2.74447e-06	ENSG00000068654;ENSG00000087995;ENSG00000090861;ENSG00000100890;ENSG00000101347;ENSG00000104907;ENSG00000107371;ENSG00000117593;ENSG00000122435;ENSG00000123600;ENSG00000125630;ENSG00000126070;ENSG00000127804;ENSG00000129480;ENSG00000130713;ENSG00000134815;ENSG00000137054;ENSG00000144231;ENSG00000151014;ENSG00000152944;ENSG00000157036;ENSG00000160193;ENSG00000165055;ENSG00000168002;ENSG00000171865…	59	23.7336	2.48592	5.0866e-11	4.7814e-09	ENSG00000043514;ENSG00000058600;ENSG00000067704;ENSG00000068654;ENSG00000077348;ENSG00000086189;ENSG00000087995;ENSG00000090861;ENSG00000100201;ENSG00000101347;ENSG00000104835;ENSG00000104907;ENSG00000107371;ENSG00000117751;ENSG00000122435;ENSG00000123600;ENSG00000125630;ENSG00000126070;ENSG00000126749;ENSG00000127804;ENSG00000129480;ENSG00000130348;ENSG00000130713;ENSG00000132664;ENSG00000133706…	37	18.2413	2.02836	3.25837e-05	0.00306287	ENSG00000068654;ENSG00000087995;ENSG00000090861;ENSG00000100890;ENSG00000101347;ENSG00000104907;ENSG00000107371;ENSG00000117593;ENSG00000122435;ENSG00000122687;ENSG00000123600;ENSG00000125630;ENSG00000126070;ENSG00000127804;ENSG00000129480;ENSG00000130713;ENSG00000130764;ENSG00000134815;ENSG00000137054;ENSG00000139131;ENSG00000144231;ENSG00000151014;ENSG00000152944;ENSG00000157036;ENSG00000160193…
GO:0003729	mRNA binding	233	17	7.36946	2.30682	0.00119023	0.0479494	ENSG00000003756;ENSG00000100296;ENSG00000104824;ENSG00000110700;ENSG00000116350;ENSG00000120948;ENSG00000122406;ENSG00000132463;ENSG00000142541;ENSG00000142864;ENSG00000145425;ENSG00000146963;ENSG00000151014;ENSG00000171490;ENSG00000173933;ENSG00000178700;ENSG00000228716	48	15.7998	3.03801	2.41118e-12	3.39977e-10	ENSG00000003756;ENSG00000007392;ENSG00000055917;ENSG00000070756;ENSG00000074356;ENSG00000075151;ENSG00000092199;ENSG00000099783;ENSG00000100296;ENSG00000104824;ENSG00000104852;ENSG00000107581;ENSG00000108848;ENSG00000110700;ENSG00000110713;ENSG00000111605;ENSG00000112081;ENSG00000114416;ENSG00000116350;ENSG00000117569;ENSG00000117751;ENSG00000120948;ENSG00000122406;ENSG00000124571;ENSG00000132463…	24	12.1435	1.97636	0.00111188	0.044793	ENSG00000003756;ENSG00000071626;ENSG00000100296;ENSG00000100353;ENSG00000102317;ENSG00000104824;ENSG00000110700;ENSG00000116350;ENSG00000120948;ENSG00000122406;ENSG00000122729;ENSG00000132463;ENSG00000142541;ENSG00000142864;ENSG00000145425;ENSG00000146963;ENSG00000151014;ENSG00000171490;ENSG00000173933;ENSG00000178700;ENSG00000179151;ENSG00000179218;ENSG00000228716;ENSG00000265241
GO:0019843	rRNA binding	65	8	2.05586	3.89132	0.000972191	0.045693	ENSG00000110700;ENSG00000122406;ENSG00000125691;ENSG00000135679;ENSG00000145592;ENSG00000170889;ENSG00000182768;ENSG00000198242	NA	NA	NA	NA	NA	NA	NA	NA	NA	NA	NA	NA
GO:0016741	transferase activity, transferring one-carbon groups	219	17	6.92666	2.45429	0.0005964	0.033637	ENSG00000087995;ENSG00000101247;ENSG00000104907;ENSG00000116237;ENSG00000122435;ENSG00000123600;ENSG00000127804;ENSG00000129691;ENSG00000130816;ENSG00000160193;ENSG00000165055;ENSG00000178694;ENSG00000181038;ENSG00000185432;ENSG00000186532;ENSG00000188917;ENSG00000206562	NA	NA	NA	NA	NA	NA	NA	NA	NA	NA	NA	NA
GO:0000049	tRNA binding	59	NA	NA	NA	NA	NA	NA	11	4.00081	2.74944	0.00181172	0.0255452	ENSG00000067704;ENSG00000090861;ENSG00000104907;ENSG00000124571;ENSG00000129480;ENSG00000134684;ENSG00000137760;ENSG00000162971;ENSG00000177192;ENSG00000178694;ENSG00000184575	10	3.07497	3.25207	0.000853714	0.0401246	ENSG00000090861;ENSG00000104907;ENSG00000106246;ENSG00000117593;ENSG00000129480;ENSG00000139131;ENSG00000177192;ENSG00000178694;ENSG00000184575;ENSG00000248919
GO:0017056	structural constituent of nuclear pore	26	NA	NA	NA	NA	NA	NA	9	1.76307	5.10473	3.1706e-05	0.00111764	ENSG00000030066;ENSG00000069248;ENSG00000110713;ENSG00000113569;ENSG00000124789;ENSG00000125450;ENSG00000139496;ENSG00000155561;ENSG00000169062	NA	NA	NA	NA	NA	NA
GO:0008536	Ran GTPase binding	38	NA	NA	NA	NA	NA	NA	12	2.57679	4.65695	4.56416e-06	0.000214515	ENSG00000005810;ENSG00000065150;ENSG00000082898;ENSG00000083312;ENSG00000089685;ENSG00000100401;ENSG00000105576;ENSG00000124207;ENSG00000124571;ENSG00000180198;ENSG00000184575;ENSG00000205339	NA	NA	NA	NA	NA	NA
GO:0061980	regulatory RNA binding	37	NA	NA	NA	NA	NA	NA	9	2.50898	3.58711	0.000642505	0.0129419	ENSG00000015479;ENSG00000055917;ENSG00000113761;ENSG00000126070;ENSG00000134644;ENSG00000135829;ENSG00000138035;ENSG00000165732;ENSG00000173933	NA	NA	NA	NA	NA	NA
GO:0017069	snRNA binding	39	NA	NA	NA	NA	NA	NA	9	2.64461	3.40315	0.000968609	0.0170717	ENSG00000075856;ENSG00000100028;ENSG00000104852;ENSG00000127804;ENSG00000130332;ENSG00000136875;ENSG00000155858;ENSG00000165732;ENSG00000198563	NA	NA	NA	NA	NA	NA
GO:0003727	single-stranded RNA binding	88	NA	NA	NA	NA	NA	NA	18	5.96731	3.01643	2.0206e-05	0.000814013	ENSG00000056097;ENSG00000063046;ENSG00000070495;ENSG00000070756;ENSG00000092199;ENSG00000100722;ENSG00000107201;ENSG00000114416;ENSG00000116001;ENSG00000120948;ENSG00000126070;ENSG00000135316;ENSG00000135829;ENSG00000138035;ENSG00000147274;ENSG00000168002;ENSG00000177192;ENSG00000196365	NA	NA	NA	NA	NA	NA
GO:0008135	translation factor activity, RNA binding	87	NA	NA	NA	NA	NA	NA	17	5.8995	2.8816	6.29684e-05	0.00147976	ENSG00000063046;ENSG00000075151;ENSG00000089154;ENSG00000100129;ENSG00000103319;ENSG00000103342;ENSG00000104408;ENSG00000107581;ENSG00000111358;ENSG00000111361;ENSG00000130741;ENSG00000135930;ENSG00000139726;ENSG00000145736;ENSG00000149100;ENSG00000151247;ENSG00000178982	NA	NA	NA	NA	NA	NA
GO:0004386	helicase activity	150	NA	NA	NA	NA	NA	NA	28	10.1716	2.75277	7.97487e-07	5.62228e-05	ENSG00000071794;ENSG00000093009;ENSG00000100201;ENSG00000100297;ENSG00000101003;ENSG00000104738;ENSG00000107201;ENSG00000107290;ENSG00000107815;ENSG00000111364;ENSG00000111642;ENSG00000116830;ENSG00000119969;ENSG00000125885;ENSG00000127311;ENSG00000127616;ENSG00000134815;ENSG00000135829;ENSG00000136271;ENSG00000138346;ENSG00000145833;ENSG00000147536;ENSG00000153147;ENSG00000153922;ENSG00000165732…	NA	NA	NA	NA	NA	NA
GO:0016779	nucleotidyltransferase activity	129	NA	NA	NA	NA	NA	NA	22	8.74754	2.51499	5.11765e-05	0.00142329	ENSG00000009413;ENSG00000014138;ENSG00000058600;ENSG00000068654;ENSG00000100479;ENSG00000101290;ENSG00000107951;ENSG00000122678;ENSG00000125630;ENSG00000129566;ENSG00000130997;ENSG00000132604;ENSG00000132664;ENSG00000137054;ENSG00000138035;ENSG00000152944;ENSG00000168002;ENSG00000170734;ENSG00000173614;ENSG00000228049;ENSG00000241258;ENSG00000256525	NA	NA	NA	NA	NA	NA
GO:0032182	ubiquitin-like protein binding	94	NA	NA	NA	NA	NA	NA	16	6.37418	2.51013	0.000535783	0.0116224	ENSG00000077254;ENSG00000113194;ENSG00000118412;ENSG00000126261;ENSG00000135679;ENSG00000136100;ENSG00000137692;ENSG00000140464;ENSG00000141198;ENSG00000141971;ENSG00000154277;ENSG00000163960;ENSG00000173960;ENSG00000177889;ENSG00000182446;ENSG00000243667	NA	NA	NA	NA	NA	NA
GO:0140097	catalytic activity, acting on DNA	184	NA	NA	NA	NA	NA	NA	31	12.4771	2.48455	2.09335e-06	0.000118065	ENSG00000009413;ENSG00000014138;ENSG00000076248;ENSG00000093009;ENSG00000100479;ENSG00000101003;ENSG00000104738;ENSG00000107290;ENSG00000107815;ENSG00000111642;ENSG00000113456;ENSG00000122678;ENSG00000125871;ENSG00000126215;ENSG00000127311;ENSG00000129566;ENSG00000130816;ENSG00000130997;ENSG00000132604;ENSG00000135829;ENSG00000138346;ENSG00000140398;ENSG00000147536;ENSG00000152457;ENSG00000153922…	NA	NA	NA	NA	NA	NA
GO:0003697	single-stranded DNA binding	107	NA	NA	NA	NA	NA	NA	17	7.25571	2.34298	0.000824408	0.0154989	ENSG00000002016;ENSG00000069275;ENSG00000093009;ENSG00000101347;ENSG00000104738;ENSG00000107815;ENSG00000117748;ENSG00000132604;ENSG00000134758;ENSG00000135829;ENSG00000138095;ENSG00000139618;ENSG00000144381;ENSG00000162613;ENSG00000168002;ENSG00000177302;ENSG00000196365	NA	NA	NA	NA	NA	NA
GO:0016874	ligase activity	151	NA	NA	NA	NA	NA	NA	21	10.2394	2.05091	0.00129159	0.01917	ENSG00000035687;ENSG00000067704;ENSG00000090861;ENSG00000104835;ENSG00000114054;ENSG00000126261;ENSG00000128050;ENSG00000130348;ENSG00000130985;ENSG00000133706;ENSG00000134684;ENSG00000135679;ENSG00000146282;ENSG00000154277;ENSG00000159593;ENSG00000163655;ENSG00000170445;ENSG00000178921;ENSG00000214021;ENSG00000250151;ENSG00000257218	NA	NA	NA	NA	NA	NA
GO:0044389	ubiquitin-like protein ligase binding	298	NA	NA	NA	NA	NA	NA	39	20.2075	1.92998	5.55183e-05	0.00142329	ENSG00000003400;ENSG00000064012;ENSG00000066427;ENSG00000071794;ENSG00000100387;ENSG00000100401;ENSG00000107201;ENSG00000113013;ENSG00000113194;ENSG00000114302;ENSG00000115415;ENSG00000117748;ENSG00000122406;ENSG00000125691;ENSG00000135679;ENSG00000135930;ENSG00000136738;ENSG00000137992;ENSG00000138095;ENSG00000138496;ENSG00000140464;ENSG00000141510;ENSG00000144381;ENSG00000154277;ENSG00000159593…	NA	NA	NA	NA	NA	NA
GO:0019787	ubiquitin-like protein transferase activity	417	NA	NA	NA	NA	NA	NA	45	28.2769	1.5914	0.00128192	0.01917	ENSG00000001629;ENSG00000005810;ENSG00000009335;ENSG00000071794;ENSG00000085382;ENSG00000085978;ENSG00000087448;ENSG00000089053;ENSG00000100387;ENSG00000101695;ENSG00000101752;ENSG00000101966;ENSG00000112234;ENSG00000115760;ENSG00000118420;ENSG00000119402;ENSG00000124208;ENSG00000124226;ENSG00000127452;ENSG00000134086;ENSG00000134758;ENSG00000135679;ENSG00000140464;ENSG00000145916;ENSG00000152944…	NA	NA	NA	NA	NA	NA
GO:0016887	ATPase activity	438	NA	NA	NA	NA	NA	NA	45	29.701	1.5151	0.00335229	0.0450164	ENSG00000013275;ENSG00000017797;ENSG00000049541;ENSG00000054523;ENSG00000069849;ENSG00000071794;ENSG00000100201;ENSG00000100519;ENSG00000102910;ENSG00000104738;ENSG00000111358;ENSG00000111642;ENSG00000113013;ENSG00000116830;ENSG00000119688;ENSG00000126215;ENSG00000127311;ENSG00000127616;ENSG00000129250;ENSG00000134815;ENSG00000135776;ENSG00000135829;ENSG00000136271;ENSG00000138182;ENSG00000138346…	NA	NA	NA	NA	NA	NA
GO:0016853	isomerase activity	157	NA	NA	NA	NA	NA	NA	NA	NA	NA	NA	NA	NA	22	8.18254	2.68865	2.10013e-05	0.00296119	ENSG00000008394;ENSG00000037757;ENSG00000089248;ENSG00000099977;ENSG00000100442;ENSG00000105220;ENSG00000112972;ENSG00000123179;ENSG00000124370;ENSG00000129317;ENSG00000132199;ENSG00000147155;ENSG00000159921;ENSG00000165526;ENSG00000167112;ENSG00000167720;ENSG00000171960;ENSG00000177192;ENSG00000177302;ENSG00000196262;ENSG00000198911;ENSG00000240344
