# Supplementary material
Source: HighWire-hosted journal article supplement (doi:10.1101/rna.080097.124)
Supplement: Supplemental_TableS12.xlsx [file Supplemental_TableS12.xlsx]

## Sheet: miRNA_statistics_2024_strongfix
miRNA	miRNA_DE_total_baseMean	miRNA_DE_total_LFC	miRNA_DE_total_padj	miRNA_DE_polysomes_baseMean	miRNA_DE_polysomes_LFC	miRNA_DE_polysomes_padj	miRTarBase_target_count	DESeq2_target_count	ADAR1_unbound_enriched_gene_count	ADAR1_poly_enriched_gene_count	total_up_gene_count	total_down_gene_count
hsa-mir-20a-5p	10894.9	0.193056	0.852534	2273.81	-0.74848	0.0894322	72	64	0	2	3	5
hsa-mir-146a-5p	5187.83	-0.512628	0.335472	3883.96	-0.269771	0.834121	73	57	2	3	6	6
hsa-mir-122-5p	300941	0.379489	0.464068	668942	-0.779744	0.234086	69	60	1	1	4	2
hsa-mir-222-3p	5322.51	0.211136	0.591479	3538.3	-0.35261	0.446325	45	35	0	1	5	2
hsa-mir-21-5p	643396	0.321093	0.43478	578075	-0.114704	0.973026	136	116	2	5	10	3
hsa-mir-148a-3p	526177	0.232784	0.602709	628763	-0.310443	0.681898	41	35	0	3	5	6
hsa-mir-93-5p	7808.25	0.196314	0.735021	2693.34	-0.195207	0.810307	32	30	1	1	5	2
hsa-mir-9-5p	72.2473	-0.438787	0.572457	32.8965	-0.477532	0.816726	83	68	1	3	5	5
hsa-mir-765	NA	NA	NA	NA	NA	NA	5	3	1	0	1	0
hsa-mir-7-5p	58039.8	0.00302355	0.993081	57148	-0.533817	0.257195	46	39	0	0	1	2
hsa-mir-661	NA	NA	NA	NA	NA	NA	8	8	0	0	0	0
hsa-mir-659-3p	NA	NA	NA	NA	NA	NA	2	2	1	0	0	0
hsa-mir-562	NA	NA	NA	NA	NA	NA	3	2	0	0	0	0
hsa-mir-559	2.8563	-0.625323	0.851773	NA	NA	NA	5	5	0	0	0	0
hsa-mir-548d-3p	81.3917	0.154775	0.852534	23.1025	1.89692	0.0716101	2	2	0	0	0	0
hsa-mir-532-5p	9043.21	-0.227085	0.555191	6452.62	-0.348067	0.504602	7	5	0	0	1	0
hsa-mir-504-5p	NA	NA	NA	NA	NA	NA	6	5	0	0	0	0
hsa-mir-485-3p	NA	NA	NA	NA	NA	NA	6	5	0	0	0	1
hsa-mir-451a	NA	NA	NA	NA	NA	NA	22	18	0	0	1	1
hsa-mir-429	30.6393	-1.27318	0.0108035	21.2541	-0.743888	0.677963	40	33	0	2	1	4
hsa-mir-375	107.236	1.15073	0.000223883	117.253	0.0712494	0.973026	37	35	1	2	1	0
hsa-mir-373-3p	NA	NA	NA	NA	NA	NA	25	24	0	1	1	4
hsa-mir-372-3p	NA	NA	NA	NA	NA	NA	20	18	2	0	1	2
hsa-mir-34b-5p	NA	NA	NA	NA	NA	NA	13	12	0	0	1	1
hsa-mir-34a-5p	301.103	0.847704	0.00114523	70.5497	-0.195476	0.949402	132	101	0	2	8	9
hsa-mir-346	NA	NA	NA	NA	NA	NA	11	11	0	0	4	0
hsa-mir-328-3p	116.733	0.446716	0.295164	102.068	0.277047	0.810307	9	6	0	0	2	1
hsa-mir-326	52.6267	-0.276434	0.728871	31.5598	-0.438764	0.810307	14	13	1	1	0	2
hsa-mir-31-5p	NA	NA	NA	NA	NA	NA	64	50	0	2	4	3
hsa-mir-302d-3p	NA	NA	NA	NA	NA	NA	15	12	1	0	1	1
hsa-mir-29b-3p	54.2061	0.487847	0.474548	NA	NA	NA	93	73	0	3	4	5
hsa-mir-298	NA	NA	NA	NA	NA	NA	3	3	0	0	0	0
hsa-mir-27a-3p	3178.71	0.127525	0.804027	2020.7	-0.10228	0.973026	66	56	0	2	2	4
hsa-mir-26a-5p	29927.4	0.00636024	0.992264	21755.5	-0.376502	0.513474	74	60	1	3	5	6
hsa-mir-24-3p	2812.21	-0.51026	0.0908666	2183.58	-0.312842	0.701192	88	75	0	2	6	5
hsa-mir-223-3p	NA	NA	NA	NA	NA	NA	48	41	2	2	2	3
hsa-mir-221-3p	3417.49	-0.131551	0.769974	1590.88	-0.224821	0.799187	72	59	0	2	4	4
hsa-mir-217	529.191	-1.76902	6.25e-06	196.013	-0.323589	0.854037	18	18	0	2	1	1
hsa-mir-214-3p	NA	NA	NA	NA	NA	NA	45	39	1	1	1	5
hsa-mir-210-3p	617.052	0.145757	0.7927	275.083	0.200155	0.900673	53	44	0	2	3	2
hsa-mir-206	NA	NA	NA	NA	NA	NA	33	25	1	1	1	1
hsa-mir-204-5p	84.29	0.183233	0.852534	71.7726	0.424748	0.677963	62	50	0	2	5	6
hsa-mir-200c-3p	49.7033	0.586462	0.449403	27.5499	-0.176046	0.970551	91	73	2	4	4	7
hsa-mir-200b-3p	1062.64	-0.429447	0.295164	1049.58	-0.290594	0.681898	77	65	0	3	3	4
hsa-mir-200a-3p	127.579	-0.326742	0.549242	73.1568	-0.851226	0.324849	60	52	0	5	4	2
hsa-mir-199b-5p	6.41458	-0.95778	0.592492	NA	NA	NA	16	15	1	1	1	1
hsa-mir-197-3p	2142.54	-0.391259	0.50895	1025.51	0.290753	0.772685	10	9	0	0	0	0
hsa-mir-196a-5p	3149.97	0.0991309	0.852534	2715.57	-0.71173	0.211349	28	20	1	0	1	7
hsa-mir-195-5p	4.98821	1.3909	0.43478	NA	NA	NA	44	36	2	0	1	2
hsa-mir-18a-3p	131.393	0.0297496	0.971809	84.044	0.0892004	0.973026	3	3	0	0	1	0
hsa-mir-181c-5p	4.26478	2.86939	0.0503965	NA	NA	NA	28	24	0	1	4	3
hsa-mir-181b-5p	2598.73	-0.85414	0.000539595	2002.01	-0.539452	0.358822	42	38	1	2	4	4
hsa-mir-181a-5p	2787.24	-0.548429	0.0453136	2563.42	-0.587951	0.31363	74	63	0	2	9	4
hsa-mir-17-5p	4799.38	0.0113448	0.992264	1396.64	-0.129653	0.922108	84	71	0	3	5	6
hsa-mir-16-5p	1069.55	0.265129	0.43478	814.697	-0.0602173	0.973026	67	51	2	1	2	6
hsa-mir-15b-5p	932.119	0.239304	0.602709	328.302	-0.0494984	0.973026	35	27	0	0	2	3
hsa-mir-15a-5p	82.0466	-0.104911	0.931281	29.8419	-0.655278	0.677963	45	36	1	1	2	2
hsa-mir-155-5p	NA	NA	NA	NA	NA	NA	223	198	2	8	6	9
hsa-mir-153-3p	NA	NA	NA	NA	NA	NA	15	13	0	0	1	1
hsa-mir-152-3p	541.855	0.406287	0.364641	364.403	-0.275521	0.681898	26	21	0	2	3	2
hsa-mir-148b-3p	31960.3	0.152716	0.728871	18931.1	0.21811	0.812107	18	14	0	2	2	1
hsa-mir-145-5p	5.08058	0.538074	0.835001	NA	NA	NA	143	121	1	3	12	9
hsa-mir-143-3p	236.429	-0.950893	0.0807141	81.6796	-0.222947	0.973026	47	36	0	1	4	2
hsa-mir-141-3p	NA	NA	NA	NA	NA	NA	58	53	1	2	5	2
hsa-mir-133a-3p	NA	NA	NA	NA	NA	NA	47	38	2	1	3	1
hsa-mir-132-3p	8.72068	0.437228	0.803011	NA	NA	NA	32	29	0	1	1	2
hsa-mir-130b-3p	174.118	0.0364525	0.97521	143.164	-0.119645	0.963302	34	29	0	1	3	2
hsa-mir-128-3p	8640.09	-0.592327	0.0807141	13117.7	-0.960587	0.00467624	47	34	0	1	3	7
hsa-mir-126-3p	1604.19	0.100571	0.870333	1353.94	0.0462855	0.973026	44	35	1	4	1	1
hsa-mir-125b-5p	1401.79	-0.189504	0.62407	1012.11	0.609259	0.211349	119	98	3	2	6	8
hsa-mir-124-3p	NA	NA	NA	NA	NA	NA	91	78	3	6	6	9
hsa-mir-107	1220.24	0.128157	0.867015	483.817	-0.482601	0.361514	39	31	0	0	0	5
hsa-mir-106b-5p	1062.64	0.225509	0.674403	349.73	0.0655209	0.973026	46	37	1	1	3	2
hsa-mir-106a-5p	137.082	-0.0190343	0.992264	35.5967	-0.346061	0.833048	41	38	1	1	2	5
hsa-mir-101-3p	13052.2	-0.0100711	0.992264	4045.55	0.0968546	0.973026	55	46	1	0	0	5
hsa-mir-100-5p	8811.14	-1.45998	3.67e-13	6930.58	0.208031	0.816726	24	18	0	0	0	2
hsa-mir-1-3p	10.1377	1.75586	0.22024	NA	NA	NA	79	63	0	2	6	6
hsa-let-7g-5p	446.82	-0.258209	0.593473	645.476	-1.07336	0.007707	19	18	0	0	2	1
hsa-let-7c-5p	308.756	-0.648636	0.0189186	438.938	-0.535879	0.446325	28	26	1	0	0	3
hsa-let-7a-5p	1279.34	-0.854652	0.000642885	1886.65	-0.65745	0.306086	55	50	1	2	3	4
hsa-mir-184	4.85065	1.14331	0.555191	NA	NA	NA	19	15	0	1	1	1
hsa-mir-802	NA	NA	NA	NA	NA	NA	1	1	0	0	0	0
hsa-mir-650	NA	NA	NA	NA	NA	NA	3	3	0	0	1	0
hsa-mir-224-5p	NA	NA	NA	NA	NA	NA	34	28	1	0	3	3
hsa-let-7f-5p	3824.86	0.0412295	0.960101	4737.02	-0.870728	0.0978783	18	12	0	0	0	3
hsa-mir-422a	69.7546	0.373998	0.583416	32.0434	-0.590318	0.677963	7	5	0	0	1	0
hsa-mir-1296-5p	167.72	-0.427797	0.389609	86.5645	0.534653	0.487638	2	2	0	0	0	0
hsa-mir-193b-3p	101.933	0.00636447	0.992842	45.5427	0.420411	0.816726	16	13	0	0	2	2
hsa-mir-138-5p	NA	NA	NA	NA	NA	NA	47	40	1	2	2	4
hsa-mir-519c-3p	NA	NA	NA	NA	NA	NA	6	6	0	0	1	1
hsa-mir-20b-5p	33.193	-0.206108	0.878949	NA	NA	NA	20	18	0	1	1	0
hsa-mir-324-5p	10.2961	-0.343694	0.851773	NA	NA	NA	6	5	0	0	0	0
hsa-mir-216a-5p	14.4314	-2.02643	0.00706067	11.0373	-0.439106	0.900673	10	9	0	1	0	1
hsa-mir-942-5p	81.906	0.312278	0.646408	61.554	-0.621567	0.446325	6	5	0	0	0	1
hsa-mir-182-5p	28846.5	0.0719902	0.955464	14733.7	-0.582883	0.20129	52	39	0	2	5	2
hsa-mir-657	NA	NA	NA	NA	NA	NA	3	3	0	0	0	1
hsa-mir-654-3p	NA	NA	NA	NA	NA	NA	1	1	0	0	0	0
hsa-mir-639	NA	NA	NA	NA	NA	NA	2	2	0	0	0	0
hsa-mir-572	NA	NA	NA	NA	NA	NA	2	2	0	0	0	0
hsa-mir-520h	NA	NA	NA	NA	NA	NA	5	5	0	0	2	0
hsa-mir-520b	NA	NA	NA	NA	NA	NA	9	7	0	0	0	0
hsa-mir-520a-3p	NA	NA	NA	NA	NA	NA	7	5	0	0	1	1
hsa-mir-519e-3p	NA	NA	NA	NA	NA	NA	1	1	0	0	0	0
hsa-mir-519d-3p	NA	NA	NA	NA	NA	NA	10	8	0	1	0	1
hsa-mir-519b-3p	NA	NA	NA	NA	NA	NA	2	2	0	0	0	0
hsa-mir-515-3p	NA	NA	NA	NA	NA	NA	1	1	0	0	0	0
hsa-mir-423-3p	23128.2	-0.329033	0.255335	20540.9	0.12643	0.852168	4	4	0	0	0	1
hsa-mir-363-3p	4.1211	-5.18523	0.00414128	NA	NA	NA	12	11	0	0	0	3
hsa-mir-345-5p	199.254	-0.0483381	0.960101	86.8857	-0.176612	0.928518	3	2	0	0	0	0
hsa-mir-299-5p	NA	NA	NA	NA	NA	NA	3	3	0	0	0	1
hsa-mir-28-5p	307.204	0.304013	0.464068	247.551	-0.213646	0.816726	14	12	0	0	0	1
hsa-mir-208b-3p	NA	NA	NA	NA	NA	NA	5	3	0	0	0	0
hsa-mir-208a-3p	NA	NA	NA	NA	NA	NA	9	6	0	1	1	0
hsa-mir-125a-5p	4604.63	0.109672	0.835001	3392.72	0.0592558	0.973026	51	42	1	0	1	3
hsa-mir-503-5p	257.498	-0.00251784	0.995945	174.017	-0.885054	0.0928127	28	25	1	0	0	1
hsa-mir-424-5p	39.4897	0.380718	0.739986	NA	NA	NA	33	32	0	0	0	2
hsa-mir-335-5p	21.6079	-0.0671892	0.969776	NA	NA	NA	38	30	1	2	3	6
hsa-mir-378a-3p	12457.5	0.394228	0.388512	6265.48	-0.308293	0.689279	21	17	0	0	2	2
hsa-mir-29a-3p	909.209	0.288902	0.473931	554.393	-0.0229124	0.973026	106	86	1	3	6	8
hsa-mir-140-5p	268.354	0.104397	0.885855	168.297	-0.643397	0.307069	30	24	0	2	1	2
hsa-mir-302c-3p	NA	NA	NA	NA	NA	NA	9	7	0	0	0	0
hsa-mir-18b-5p	10.0031	-1.45912	0.169199	NA	NA	NA	8	4	0	0	0	0
hsa-mir-18a-5p	255.792	-0.241717	0.610083	88.5956	-0.3201	0.810307	31	26	0	1	3	1
hsa-mir-135a-5p	16.7393	1.31537	0.0721259	14.1339	0.295566	0.961791	33	29	0	2	3	3
hsa-mir-330-3p	216.489	0.163446	0.776436	237.143	0.144381	0.928518	11	8	0	1	1	1
hsa-mir-34c-5p	NA	NA	NA	NA	NA	NA	42	33	0	0	4	1
hsa-mir-199a-3p	NA	NA	NA	NA	NA	NA	27	21	0	1	1	4
hsa-mir-29c-3p	7.2954	0.337764	0.867015	NA	NA	NA	67	53	0	3	1	6
hsa-mir-150-5p	NA	NA	NA	NA	NA	NA	30	22	0	1	0	3
hsa-mir-203a-3p	6.23052	-1.63356	0.291465	NA	NA	NA	60	53	0	2	4	6
hsa-mir-16-1-3p	40.9369	0.555795	0.387571	NA	NA	NA	8	4	0	0	0	0
hsa-mir-130a-3p	207.284	0.468556	0.287226	177.87	-0.411497	0.677963	33	26	0	0	4	4
hsa-mir-32-5p	646.934	-0.487199	0.080159	72.6973	-0.415899	0.810307	16	14	0	0	0	2
hsa-mir-25-3p	44874.5	0.381208	0.105749	35052.1	-0.0263412	0.973026	29	26	0	0	3	1
hsa-mir-377-3p	NA	NA	NA	NA	NA	NA	9	9	0	1	1	1
hsa-mir-196b-5p	113.004	-1.46568	1.54e-06	74.2247	-0.694236	0.358822	16	12	0	0	1	2
hsa-mir-218-5p	675.453	-0.413779	0.111344	853.532	-0.60814	0.18841	49	39	0	0	2	4
hsa-mir-370-3p	NA	NA	NA	NA	NA	NA	12	11	0	0	1	0
hsa-mir-133b	NA	NA	NA	NA	NA	NA	42	34	1	3	2	3
hsa-mir-96-5p	523.609	0.162299	0.72842	351.585	0.153581	0.910858	27	21	0	0	3	1
hsa-mir-421	207.416	-0.595789	0.0503965	110.235	-1.16152	0.0254255	8	8	0	0	3	0
hsa-mir-98-5p	9.31364	0.182423	0.951067	NA	NA	NA	34	26	0	0	0	3
hsa-mir-105-5p	NA	NA	NA	NA	NA	NA	9	8	0	0	0	1
hsa-mir-10a-5p	12.6644	-2.33419	0.00558357	13.1635	0.866479	0.834121	20	15	0	0	1	2
hsa-mir-338-5p	NA	NA	NA	NA	NA	NA	7	7	0	0	2	0
hsa-mir-545-3p	NA	NA	NA	NA	NA	NA	3	2	0	0	0	0
hsa-mir-205-5p	NA	NA	NA	NA	NA	NA	47	40	0	1	4	6
hsa-mir-19b-3p	1724.54	0.107734	0.885855	601.807	0.195938	0.834121	30	28	0	2	2	1
hsa-mir-23b-3p	3896.31	-0.541517	0.0166509	1579.38	-0.355324	0.487638	32	30	0	1	4	1
hsa-mir-92a-3p	98302.2	-0.0867606	0.852534	75296.2	0.0511269	0.973026	39	34	0	3	4	2
hsa-mir-433-3p	NA	NA	NA	NA	NA	NA	11	10	0	0	2	1
hsa-mir-494-3p	NA	NA	NA	NA	NA	NA	33	29	0	2	5	7
hsa-let-7b-5p	10.0692	-2.41926	0.00998512	16.7996	-1.31646	0.41103	42	35	1	1	2	3
hsa-mir-605-5p	NA	NA	NA	NA	NA	NA	4	4	0	0	0	0
hsa-mir-376a-5p	NA	NA	NA	NA	NA	NA	9	9	0	0	1	0
hsa-mir-30a-3p	465.227	-0.193037	0.747819	264.083	0.0453748	0.973026	12	10	0	0	1	0
hsa-mir-27b-3p	52464.7	-0.542866	0.0114732	17542	-0.378401	0.495435	52	40	0	1	2	4
hsa-mir-23a-3p	1622.17	-0.0983191	0.913392	638.943	-0.0541212	0.973026	51	46	1	1	2	5
hsa-mir-19a-3p	627.154	0.00710465	0.992264	392.528	0.173933	0.939549	55	47	1	2	4	4
hsa-mir-126-5p	39.3938	0.128236	0.913392	25.8919	0.204988	0.964049	11	8	0	0	1	1
hsa-mir-103a-3p	26698	0.0148062	0.992264	9301.28	-0.750677	0.0342841	29	25	1	0	1	3
hsa-mir-520c-3p	NA	NA	NA	NA	NA	NA	9	8	0	2	0	2
hsa-mir-135b-5p	NA	NA	NA	NA	NA	NA	19	16	0	0	0	0
hsa-mir-30a-5p	5413.65	0.041791	0.965657	1088.37	-1.65162	1.79e-05	54	44	0	2	4	6
hsa-mir-129-5p	4.55894	-0.998553	0.6526	NA	NA	NA	28	21	0	0	1	0
hsa-mir-320a	10653.4	0.0600938	0.925082	5862.86	-0.117447	0.949402	48	41	0	1	4	6
hsa-mir-510-5p	NA	NA	NA	NA	NA	NA	3	1	0	0	0	0
hsa-mir-22-3p	2692.68	0.18175	0.674403	3223.7	0.0528237	0.973026	58	47	1	4	8	1
hsa-let-7d-5p	5.77275	-1.07325	0.572457	10.1757	-0.479083	0.900673	10	8	0	0	0	0
hsa-mir-10b-5p	8706.68	-6.5195	6.81e-252	8498.79	0.0237054	0.973026	38	31	0	2	2	2
hsa-let-7e-5p	826.263	-0.24571	0.480387	1176.95	-0.735822	0.197204	19	14	0	0	0	0
hsa-mir-378a-5p	42.7619	0.279601	0.786295	20.2205	0.867772	0.537985	3	2	0	0	0	0
hsa-mir-99a-5p	16155.7	-0.0892815	0.867015	21066.3	0.271238	0.810307	15	15	0	0	1	2
hsa-mir-99b-5p	29669.3	0.0709482	0.903376	24069.5	0.295531	0.677963	4	4	0	0	0	1
hsa-mir-193a-3p	13.3133	0.0563384	0.97521	NA	NA	NA	21	21	1	0	3	2
hsa-mir-137	14.8642	-0.022991	0.992264	NA	NA	NA	50	38	1	1	2	1
hsa-mir-338-3p	NA	NA	NA	NA	NA	NA	24	20	1	1	0	5
hsa-let-7i-5p	136.569	-0.0729897	0.93108	164.622	-1.46664	0.00298367	13	8	0	0	0	3
hsa-mir-144-3p	NA	NA	NA	NA	NA	NA	26	21	0	0	2	4
hsa-mir-449a	NA	NA	NA	NA	NA	NA	33	28	0	1	0	1
hsa-mir-30d-5p	39979.9	-0.170317	0.797373	22258.8	-0.122472	0.949402	21	20	0	0	2	2
hsa-mir-186-5p	1976.73	-0.370206	0.350551	1814.16	-0.492305	0.358822	19	16	0	1	0	2
hsa-mir-183-5p	11196.5	-0.350714	0.306704	7837.24	-0.525832	0.18841	25	24	0	3	2	2
hsa-mir-30e-5p	6933.18	0.09618	0.840144	1369.23	-1.10871	0.0477547	14	13	0	0	1	0
hsa-mir-34b-3p	NA	NA	NA	NA	NA	NA	26	22	0	0	2	1
hsa-mir-181d-5p	79.7924	0.904833	0.0453679	56.9772	-1.41196	0.0464033	6	4	0	0	0	0
hsa-mir-489-3p	NA	NA	NA	NA	NA	NA	7	4	0	0	0	0
hsa-mir-302b-3p	NA	NA	NA	NA	NA	NA	15	14	2	0	2	1
hsa-mir-194-5p	9336.18	0.25932	0.733021	3382.91	-0.344867	0.554765	23	21	0	2	1	0
hsa-mir-26b-5p	3755.61	0.324898	0.43478	1828.53	-0.697208	0.0511452	34	26	0	1	2	2
hsa-mir-301a-3p	9.00058	-0.171444	0.954724	NA	NA	NA	12	10	0	0	1	2
hsa-mir-302a-3p	NA	NA	NA	NA	NA	NA	21	18	1	0	1	1
hsa-mir-33b-5p	30.127	0.336998	0.716078	15.3481	1.3078	0.400777	13	10	0	0	0	0
hsa-mir-33a-5p	30.6325	0.100931	0.960101	NA	NA	NA	31	27	0	1	3	1
hsa-mir-519a-3p	NA	NA	NA	NA	NA	NA	9	8	0	0	1	0
hsa-mir-488-5p	NA	NA	NA	NA	NA	NA	1	0	0	0	0	0
hsa-mir-199a-5p	4.86444	-0.752671	0.728871	NA	NA	NA	66	59	0	2	9	4
hsa-mir-147a	NA	NA	NA	NA	NA	NA	7	6	0	1	1	1
hsa-mir-134-5p	NA	NA	NA	NA	NA	NA	17	15	0	1	2	0
hsa-mir-212-3p	NA	NA	NA	NA	NA	NA	21	17	0	0	2	2
hsa-mir-9-3p	3.45416	-0.255501	0.956794	NA	NA	NA	21	18	3	1	2	0
hsa-mir-513a-5p	NA	NA	NA	NA	NA	NA	4	3	0	0	0	0
hsa-mir-424-3p	136.034	0.321279	0.530348	132.541	-0.0121922	0.991641	2	2	0	0	0	1
hsa-mir-17-3p	37.167	-0.239856	0.804027	11.5336	0.324526	0.949402	13	11	0	1	3	3
hsa-mir-185-5p	2081.48	-0.215386	0.805801	672.248	-1.02872	0.018192	39	28	1	1	3	3
hsa-mir-584-5p	8.30284	-1.40214	0.388512	NA	NA	NA	2	2	0	1	0	0
hsa-mir-92b-3p	1199.12	0.194349	0.620238	1000.57	-0.000192564	0.999463	13	13	0	0	1	1
hsa-mir-483-3p	2815.78	-1.13379	1.37e-07	1612.52	0.0104318	0.991641	10	7	0	1	0	0
hsa-mir-192-5p	153619	0.14565	0.729156	83977.4	-0.618693	0.307069	42	36	0	2	6	4
hsa-mir-626	NA	NA	NA	NA	NA	NA	1	1	0	0	0	0
hsa-mir-520g-3p	NA	NA	NA	NA	NA	NA	5	4	0	0	1	0
hsa-mir-127-3p	5.75358	-1.63869	0.287226	NA	NA	NA	15	11	1	0	0	2
hsa-mir-491-5p	19.2504	0.0625007	0.965657	NA	NA	NA	16	12	0	0	0	0
hsa-mir-450a-5p	206.962	-0.107473	0.876301	266.714	-0.43269	0.537985	2	2	0	0	0	0
hsa-mir-512-5p	NA	NA	NA	NA	NA	NA	4	4	0	0	0	0
hsa-mir-383-5p	NA	NA	NA	NA	NA	NA	10	8	0	0	1	0
hsa-mir-219a-5p	3.46095	-0.0608758	0.992264	NA	NA	NA	6	4	0	1	0	0
hsa-mir-361-5p	NA	NA	NA	NA	NA	NA	5	3	0	0	0	0
hsa-mir-151a-5p	70.8816	-0.392893	0.49512	63.3074	-0.0221701	0.982943	10	7	0	0	0	1
hsa-mir-16-2-3p	1194.84	0.394646	0.425156	910.017	0.0295755	0.973026	1	1	0	0	0	1
hsa-mir-146b-5p	350.425	0.29107	0.473931	321.414	-0.264023	0.713746	18	14	0	1	2	2
hsa-mir-296-5p	55.5016	-0.427575	0.516293	27.2428	0.399361	0.839431	18	14	1	0	0	0
hsa-mir-374a-5p	921.557	0.16548	0.734829	533.732	0.0884638	0.973026	9	9	0	0	0	1
hsa-mir-23b-5p	68.126	-0.606222	0.268335	46.3024	0.343781	0.834121	4	4	0	0	2	0
hsa-mir-301b-3p	7.38338	-0.707874	0.666187	NA	NA	NA	5	4	0	1	0	1
hsa-mir-198	NA	NA	NA	NA	NA	NA	10	5	0	0	0	1
hsa-mir-590-5p	16.6732	-0.433071	0.728871	NA	NA	NA	11	10	0	0	1	1
hsa-mir-486-5p	NA	NA	NA	NA	NA	NA	14	12	0	0	2	1
hsa-mir-499a-5p	12.1292	0.583371	0.646124	11.9835	-0.579039	0.816726	5	4	0	1	2	0
hsa-mir-518a-5p	NA	NA	NA	NA	NA	NA	3	2	0	1	0	0
hsa-mir-582-5p	47.5705	1.29068	0.000696714	12.8959	0.906794	0.677963	6	6	0	0	0	0
hsa-mir-324-3p	41.3224	0.213011	0.835001	NA	NA	NA	5	5	0	0	0	0
hsa-mir-191-5p	11603.2	0.311122	0.43478	6220.4	-0.22542	0.772685	18	14	1	0	1	0
hsa-mir-30c-5p	5452.2	-0.0439081	0.954724	2213.28	0.363004	0.550259	39	35	0	1	2	4
hsa-mir-876-3p	NA	NA	NA	NA	NA	NA	1	1	0	0	0	0
hsa-mir-892b	NA	NA	NA	NA	NA	NA	4	4	0	0	0	1
hsa-mir-148b-5p	75.3404	0.253962	0.701025	59.6265	0.0602962	0.973026	1	1	0	0	0	0
hsa-mir-675-5p	NA	NA	NA	NA	NA	NA	15	10	0	0	1	0
hsa-mir-631	NA	NA	NA	NA	NA	NA	3	2	0	0	0	0
hsa-mir-569	NA	NA	NA	NA	NA	NA	1	0	0	0	0	0
hsa-mir-603	NA	NA	NA	NA	NA	NA	5	3	0	0	1	0
hsa-mir-769-5p	2258.16	0.0993083	0.852534	1741.41	0.0452506	0.973026	2	2	0	0	1	0
hsa-mir-617	NA	NA	NA	NA	NA	NA	1	0	0	0	0	0
hsa-mir-384	NA	NA	NA	NA	NA	NA	5	4	0	0	0	0
hsa-mir-625-5p	3.16946	1.68958	0.43478	NA	NA	NA	7	5	1	0	0	0
hsa-mir-509-3p	NA	NA	NA	NA	NA	NA	4	3	0	0	0	1
hsa-mir-632	NA	NA	NA	NA	NA	NA	1	1	0	0	0	0
hsa-mir-521	NA	NA	NA	NA	NA	NA	1	1	0	0	0	0
hsa-mir-190a-5p	16.4317	0.54383	0.614362	11.9014	0.214887	0.973026	6	4	0	0	0	0
hsa-mir-188-5p	17.6987	0.00775682	0.993428	NA	NA	NA	5	2	0	0	1	0
hsa-mir-663a	25.6104	-0.320734	0.786295	NA	NA	NA	15	14	0	0	2	2
hsa-mir-149-3p	NA	NA	NA	NA	NA	NA	6	5	0	0	0	0
hsa-mir-542-3p	405.187	0.277262	0.912528	132.145	-0.587528	0.361514	13	11	1	0	0	3
hsa-mir-340-5p	1033.11	-0.0563716	0.959592	458.2	-0.73513	0.323081	20	16	0	1	0	0
hsa-mir-885-5p	2135.02	0.118736	0.912489	892.807	0.0250104	0.973026	5	5	1	0	0	0
hsa-mir-1285-3p	64.0075	0.537326	0.268335	41.3233	-0.489226	0.677963	2	2	0	0	0	0
hsa-mir-612	NA	NA	NA	NA	NA	NA	3	3	0	0	0	0
hsa-mir-1226-3p	8.69191	-0.507743	0.769974	NA	NA	NA	1	1	0	0	0	0
hsa-mir-409-3p	NA	NA	NA	NA	NA	NA	20	18	0	0	1	0
hsa-mir-1258	NA	NA	NA	NA	NA	NA	2	2	0	0	0	1
hsa-mir-146b-3p	7.54507	0.560484	0.739986	NA	NA	NA	4	3	0	0	0	0
hsa-mir-101-5p	6.59317	0.179639	0.959208	NA	NA	NA	12	10	0	1	0	0
hsa-mir-630	NA	NA	NA	NA	NA	NA	9	7	0	0	0	0
hsa-mir-215-5p	11574.2	0.733605	0.090496	8145.67	-0.0254715	0.973026	12	10	0	0	1	1
hsa-mir-193a-5p	263.198	-0.309464	0.454817	284.565	-0.190897	0.898757	10	8	0	0	0	2
hsa-mir-448	NA	NA	NA	NA	NA	NA	9	7	0	0	0	0
hsa-mir-24-1-5p	10.8383	0.0506609	0.989724	NA	NA	NA	6	5	0	0	0	1
hsa-mir-154-5p	NA	NA	NA	NA	NA	NA	7	5	0	0	0	2
hsa-mir-522-3p	NA	NA	NA	NA	NA	NA	4	3	0	0	1	0
hsa-mir-1256	NA	NA	NA	NA	NA	NA	3	2	0	1	1	0
hsa-mir-151a-3p	50354	0.0362088	0.960101	76971.9	-0.293508	0.645069	5	2	0	0	0	0
hsa-mir-616-3p	6.00175	1.38703	0.364641	NA	NA	NA	2	2	0	0	1	0
hsa-mir-376c-3p	NA	NA	NA	NA	NA	NA	11	8	0	0	4	1
hsa-mir-376a-3p	NA	NA	NA	NA	NA	NA	12	12	1	0	2	0
hsa-mir-376b-3p	NA	NA	NA	NA	NA	NA	3	3	0	0	1	0
hsa-mir-412-3p	NA	NA	NA	NA	NA	NA	1	1	0	0	1	0
hsa-mir-331-3p	321.808	-0.249099	0.602709	139.655	0.280949	0.854037	8	8	0	0	0	2
hsa-mir-155-3p	NA	NA	NA	NA	NA	NA	7	7	0	1	1	1
hsa-mir-342-3p	77.6228	-0.0247392	0.992264	22.2432	0.415973	0.854037	13	12	1	1	1	0
hsa-mir-488-3p	NA	NA	NA	NA	NA	NA	5	4	0	1	1	1
hsa-mir-339-5p	540.903	0.0622145	0.947432	286.138	0.649951	0.220729	5	5	0	0	0	0
hsa-mir-211-5p	NA	NA	NA	NA	NA	NA	34	27	0	0	5	2
hsa-mir-369-5p	NA	NA	NA	NA	NA	NA	3	2	0	0	0	1
hsa-mir-608	NA	NA	NA	NA	NA	NA	5	5	0	0	0	2
hsa-mir-516a-3p	NA	NA	NA	NA	NA	NA	2	1	0	0	0	1
hsa-mir-371a-3p	NA	NA	NA	NA	NA	NA	4	3	0	0	0	1
hsa-mir-593-5p	NA	NA	NA	NA	NA	NA	2	2	0	0	0	0
hsa-mir-542-5p	NA	NA	NA	NA	NA	NA	2	2	0	0	0	0
hsa-mir-613	NA	NA	NA	NA	NA	NA	5	5	1	0	0	1
hsa-mir-492	NA	NA	NA	NA	NA	NA	3	3	0	0	1	0
hsa-mir-497-5p	NA	NA	NA	NA	NA	NA	31	26	0	0	1	4
hsa-mir-140-3p	13175.9	0.429059	0.519908	3011.03	0.664049	0.211349	9	8	0	0	1	0
hsa-mir-708-5p	NA	NA	NA	NA	NA	NA	20	16	1	1	2	3
hsa-mir-216b-5p	124.616	-1.61921	0.000551879	165.715	0.0271417	0.981773	9	9	0	1	1	0
hsa-mir-637	NA	NA	NA	NA	NA	NA	2	1	0	0	0	0
hsa-mir-483-5p	658.786	-0.877554	0.0024964	418.101	-0.188073	0.900673	7	7	1	0	1	0
hsa-mir-671-5p	102.816	0.227555	0.797671	26.8802	-1.16201	0.307069	2	1	0	0	0	0
hsa-mir-622	NA	NA	NA	31.4174	0.0519386	0.976562	4	3	1	0	1	1
hsa-mir-365a-3p	NA	NA	NA	NA	NA	NA	10	8	0	0	0	0
hsa-mir-34a-3p	NA	NA	NA	NA	NA	NA	18	16	0	2	0	1
hsa-mir-766-3p	13.2438	-0.941057	0.398383	NA	NA	NA	2	2	0	0	0	0
hsa-mir-30c-1-3p	62.441	0.50414	0.434029	29.3214	-1.01585	0.323081	2	2	0	0	1	0
hsa-mir-19b-1-5p	12.5402	0.37747	0.804027	NA	NA	NA	5	4	0	0	0	2
hsa-mir-610	3.32235	0.978134	0.699138	NA	NA	NA	3	3	0	0	1	0
hsa-mir-30b-5p	427	-0.148928	0.812993	61.6308	0.938607	0.324849	27	25	0	2	2	2
hsa-mir-1228-3p	4.93415	0.651658	0.772741	NA	NA	NA	3	3	0	0	0	0
hsa-mir-449b-5p	4.38284	-1.16302	0.564704	NA	NA	NA	10	10	0	1	0	0
hsa-mir-95-3p	1770.95	-0.278765	0.43478	1609.39	0.0642175	0.973026	5	4	0	0	0	0
hsa-mir-142-3p	NA	NA	NA	NA	NA	NA	25	22	2	2	3	3
hsa-mir-708-3p	NA	NA	NA	NA	NA	NA	4	4	0	0	0	0
hsa-mir-633	NA	NA	NA	NA	NA	NA	2	2	0	0	1	0
hsa-mir-520e	NA	NA	NA	NA	NA	NA	6	5	0	0	0	1
hsa-mir-629-5p	1294.1	0.484066	0.0354256	586.943	-0.651909	0.278404	2	2	0	0	0	0
hsa-mir-1245a	NA	NA	NA	NA	NA	NA	1	1	0	0	0	0
hsa-mir-128b	NA	NA	NA	NA	NA	NA	4	4	0	0	0	0
hsa-mir-886-3p	NA	NA	NA	NA	NA	NA	4	3	0	0	0	0
hsa-mir-768-5p	NA	NA	NA	NA	NA	NA	1	0	0	0	0	0
hsa-mir-1826	NA	NA	NA	NA	NA	NA	3	2	0	0	0	0
hsa-mir-129-2-3p	NA	NA	NA	NA	NA	NA	6	6	0	0	0	0
hsa-mir-5787	NA	NA	NA	NA	NA	NA	1	1	0	0	1	0
hsa-mir-595	NA	NA	NA	NA	NA	NA	1	1	0	0	0	0
hsa-mir-30e-3p	6368.03	0.125962	0.776436	4763.32	0.238339	0.810307	1	1	0	0	0	0
hsa-mir-484	829.443	0.246975	0.557292	347.324	-0.403175	0.637578	3	3	0	0	0	0
hsa-mir-125a-3p	67.2471	0.305737	0.652409	59.6149	-0.285095	0.865029	14	11	0	0	2	2
hsa-mir-518b	NA	NA	NA	NA	NA	NA	2	1	0	0	0	0
hsa-mir-762	NA	NA	NA	NA	NA	NA	3	1	0	0	0	0
hsa-mir-136-5p	NA	NA	NA	NA	NA	NA	4	2	0	0	0	0
hsa-mir-642a-5p	NA	NA	NA	NA	NA	NA	1	1	0	0	0	1
hsa-mir-524-5p	NA	NA	NA	NA	NA	NA	8	6	2	0	0	0
hsa-mir-498	NA	NA	NA	NA	NA	NA	5	4	0	0	0	0
hsa-mir-139-5p	NA	NA	NA	NA	NA	NA	25	20	0	1	1	1
hsa-mir-337-3p	NA	NA	NA	NA	NA	NA	4	4	0	0	1	0
hsa-mir-513a-3p	NA	NA	NA	NA	NA	NA	2	1	1	0	0	0
hsa-mir-296-3p	626.477	-0.898594	7.25e-06	252.347	-0.827925	0.18841	4	3	0	1	1	0
hsa-mir-24-2-5p	35.4957	0.0710045	0.960101	21.1547	-0.0604157	0.973026	2	1	0	0	0	0
hsa-mir-662	NA	NA	NA	NA	NA	NA	1	1	0	0	0	0
hsa-mir-149-5p	21.3693	0.312838	0.798174	27.8544	0.444478	0.813665	14	10	0	0	0	0
hsa-mir-615-5p	5.30823	-1.00713	0.602709	NA	NA	NA	2	2	1	0	0	1
hsa-mir-379-5p	NA	NA	NA	NA	NA	NA	2	1	0	0	0	0
hsa-mir-615-3p	1296.8	-1.12459	5.24e-07	1823.77	0.235007	0.809572	1	1	0	0	0	0
hsa-mir-511-5p	NA	NA	NA	NA	NA	NA	5	4	0	0	1	0
hsa-mir-1297	NA	NA	NA	NA	NA	NA	4	4	1	1	1	0
hsa-mir-31-3p	NA	NA	NA	NA	NA	NA	4	3	0	1	0	0
hsa-mir-1280	NA	NA	NA	NA	NA	NA	1	1	0	1	0	0
hsa-mir-490-3p	NA	NA	NA	NA	NA	NA	11	10	0	1	1	1
hsa-mir-320d	109.167	0.0451849	0.963023	501.766	-0.302568	0.810307	2	2	0	0	0	0
hsa-mir-644a	NA	NA	NA	NA	NA	NA	3	3	0	0	0	0
hsa-mir-450a-1-3p	NA	NA	NA	NA	NA	NA	1	1	0	1	0	0
hsa-mir-495-3p	NA	NA	NA	NA	NA	NA	17	14	0	0	1	1
hsa-mir-574-5p	1267.78	0.0803569	0.913433	1019.95	-1.06534	0.0297599	1	1	0	0	0	0
hsa-mir-760	57.5668	-0.571264	0.295164	53.0217	-0.888305	0.323081	3	1	0	0	0	0
hsa-mir-181a-3p	1173.12	-0.522622	0.169199	403.362	0.988737	0.0518642	1	0	0	0	0	0
hsa-mir-589-5p	1498.6	-0.279055	0.434029	2099.5	0.262693	0.810307	3	2	0	0	0	0
hsa-mir-1270	NA	NA	NA	NA	NA	NA	1	1	0	0	0	0
hsa-mir-620	NA	NA	NA	NA	NA	NA	1	1	0	0	0	0
hsa-mir-299-3p	NA	NA	NA	NA	NA	NA	2	2	0	1	0	0
hsa-mir-506-3p	NA	NA	NA	NA	NA	NA	21	18	2	1	1	3
hsa-mir-624-3p	NA	NA	NA	NA	NA	NA	1	1	0	0	0	0
hsa-mir-454-3p	267.364	-0.164062	0.736535	161.69	-0.0796096	0.973026	2	1	0	0	0	0
hsa-mir-30b-3p	30.2783	-0.58173	0.47588	12.7777	0.474653	0.88374	3	1	0	0	0	0
hsa-mir-449c-5p	25.6671	-0.276242	0.812993	NA	NA	NA	2	2	0	0	0	0
hsa-mir-596	NA	NA	NA	NA	NA	NA	1	1	0	0	0	0
hsa-mir-142-5p	NA	NA	NA	NA	NA	NA	14	13	0	1	3	0
hsa-mir-501-5p	57.9599	-0.197119	0.812993	35.8831	0.186296	0.949402	4	4	0	0	0	1
hsa-mir-362-3p	8.58428	-0.125682	0.960101	NA	NA	NA	5	4	0	0	0	0
hsa-mir-374b-5p	135.179	0.13661	0.851773	62.7804	0.516296	0.632264	4	3	0	0	0	0
hsa-mir-744-5p	1691.59	-0.489177	0.0956363	1227.45	-0.417367	0.323081	7	6	0	0	2	0
hsa-mir-652-3p	215.336	0.292266	0.480683	77.4642	-0.0655199	0.973026	2	2	0	0	0	1
hsa-mir-590-3p	75.4994	-0.000299359	0.99908	29.31	1.17828	0.230548	5	4	0	0	0	1
hsa-mir-548b-3p	NA	NA	NA	NA	NA	NA	1	1	0	0	0	0
hsa-mir-505-3p	NA	NA	NA	NA	NA	NA	4	3	0	0	0	0
hsa-mir-502-5p	11.9995	-0.328332	0.835197	NA	NA	NA	5	5	0	0	0	1
hsa-mir-202-3p	NA	NA	NA	NA	NA	NA	10	9	0	2	3	0
hsa-mir-485-5p	NA	NA	NA	NA	NA	NA	7	6	0	0	2	2
hsa-mir-425-5p	1330.42	0.464907	0.0961623	1265.72	0.452498	0.400777	9	9	0	1	0	0
hsa-let-7e-3p	8.6447	0.257977	0.913392	NA	NA	NA	3	3	0	0	0	1
hsa-mir-638	NA	NA	NA	NA	NA	NA	10	7	1	0	1	1
hsa-mir-2110	133.533	-0.214622	0.715415	118.609	0.232612	0.865029	0	0	0	0	0	0
hsa-mir-196b-3p	NA	NA	NA	NA	NA	NA	0	0	0	0	0	0
hsa-mir-365a-5p	39.6888	-0.0141331	0.992264	12.8585	0.778515	0.809572	0	0	0	0	0	0
hsa-mir-103a-2-5p	NA	NA	NA	NA	NA	NA	1	1	0	0	0	0
hsa-mir-1915-3p	NA	NA	NA	NA	NA	NA	1	0	0	0	0	0
hsa-mir-1915-5p	NA	NA	NA	NA	NA	NA	0	0	0	0	0	0
hsa-mir-1914-3p	NA	NA	NA	NA	NA	NA	0	0	0	0	0	0
hsa-mir-1914-5p	6.01468	-0.975934	0.602709	NA	NA	NA	0	0	0	0	0	0
hsa-mir-1913	NA	NA	NA	NA	NA	NA	0	0	0	0	0	0
hsa-mir-1910-5p	NA	NA	NA	NA	NA	NA	0	0	0	0	0	0
hsa-mir-1909-3p	NA	NA	NA	NA	NA	NA	0	0	0	0	0	0
hsa-mir-1909-5p	NA	NA	NA	NA	NA	NA	0	0	0	0	0	0
hsa-mir-1908-5p	356.624	0.250697	0.557292	320.441	-0.0117422	0.991641	4	3	0	0	0	0
hsa-mir-1307-3p	2999.11	-0.280288	0.480387	3603.7	0.741367	0.0978783	0	0	0	0	0	0
hsa-mir-664a-3p	61.3613	0.229881	0.835197	32.1008	0.186756	0.961958	3	2	0	0	0	0
hsa-mir-1292-5p	98.7628	-0.186351	0.804027	110.068	0.274656	0.816726	1	1	0	0	0	0
hsa-mir-1284	NA	NA	NA	NA	NA	NA	2	1	0	0	1	0
hsa-mir-1274b	NA	NA	NA	NA	NA	NA	0	0	0	0	0	0
hsa-mir-1276	13.2265	-0.527723	0.677106	14.3467	-0.354341	0.928518	0	0	0	0	0	0
hsa-mir-548h-5p	30.625	1.23286	0.0189986	19.9449	0.23132	0.960218	0	0	0	0	0	0
hsa-mir-1274a	NA	NA	NA	NA	NA	NA	1	1	0	0	1	0
hsa-mir-1268a	16.838	0.0408081	0.990985	NA	NA	NA	0	0	0	0	0	0
hsa-mir-548o-3p	311.689	0.031942	0.965657	136.569	0.771763	0.343315	0	0	0	0	0	0
hsa-mir-1262	NA	NA	NA	NA	NA	NA	0	0	0	0	0	0
hsa-mir-1260a	18.1563	0.309139	0.803011	10.5053	0.317219	0.95236	0	0	0	0	0	0
hsa-mir-1254	36.8408	0.649683	0.305067	19.8002	-0.819925	0.637006	1	1	0	1	0	0
hsa-mir-1250-5p	NA	NA	NA	NA	NA	NA	0	0	0	0	0	0
hsa-mir-1249-3p	20.9355	0.199211	0.898439	13.0598	-0.345979	0.917166	1	1	0	0	0	0
hsa-mir-1247-5p	14.199	-0.772905	0.474281	NA	NA	NA	2	2	0	0	0	0
hsa-mir-1304-5p	NA	NA	NA	NA	NA	NA	0	0	0	0	0	0
hsa-mir-1303	3842.73	-0.275277	0.482258	3343.41	-0.231371	0.681898	2	1	0	0	0	0
hsa-mir-1295a	141.888	-0.517219	0.236063	98.2407	-0.432894	0.594757	0	0	0	0	0	0
hsa-mir-1293	NA	NA	NA	NA	NA	NA	1	1	0	0	1	0
hsa-mir-1287-5p	19.397	-1.47095	0.0196476	NA	NA	NA	0	0	0	0	0	0
hsa-mir-548j-5p	8.6098	-0.0420679	0.992264	11.1105	-0.185435	0.973026	1	1	0	0	0	1
hsa-mir-1180-3p	351.255	-0.169112	0.766666	466.435	0.291774	0.677963	2	2	0	0	0	0
hsa-mir-663b	NA	NA	NA	NA	NA	NA	2	2	0	0	1	1
hsa-mir-1301-3p	46.4907	-0.384838	0.608199	48.5399	-1.21546	0.307069	0	0	0	0	0	0
hsa-mir-1271-5p	17.9147	-0.0236666	0.992264	NA	NA	NA	3	3	0	1	0	0
hsa-mir-320c	137.014	-0.117831	0.873628	286.621	-0.267285	0.833048	7	5	0	1	0	1
hsa-mir-320b	616.828	-0.078094	0.925082	1080.39	-0.223799	0.816726	3	2	0	0	0	0
hsa-mir-1237-3p	NA	NA	NA	NA	NA	NA	0	0	0	0	0	0
hsa-mir-1236-3p	NA	NA	NA	NA	NA	NA	5	2	0	0	0	0
hsa-mir-1229-3p	NA	NA	NA	NA	NA	NA	1	1	0	0	0	0
hsa-mir-1227-3p	NA	NA	NA	NA	NA	NA	0	0	0	0	0	0
hsa-mir-1226-5p	4.72032	-0.366725	0.891561	NA	NA	NA	0	0	0	0	0	0
hsa-mir-1225-3p	NA	NA	NA	NA	NA	NA	0	0	0	0	0	0
hsa-mir-1225-5p	NA	NA	NA	NA	NA	NA	1	1	0	0	0	0
hsa-mir-1224-3p	NA	NA	NA	NA	NA	NA	0	0	0	0	0	0
hsa-mir-1224-5p	NA	NA	NA	NA	NA	NA	1	1	0	0	0	0
hsa-mir-943	7.46594	-0.580826	0.736535	NA	NA	NA	0	0	0	0	0	0
hsa-mir-941	2275.18	0.229001	0.544139	2211.39	0.312057	0.619662	1	1	0	0	0	0
hsa-mir-940	2.72067	0.239632	0.960101	NA	NA	NA	3	3	1	0	0	0
hsa-mir-939-5p	NA	NA	NA	NA	NA	NA	1	1	0	0	0	1
hsa-mir-937-3p	6.37284	-1.40466	0.359035	10.3465	0.959689	0.681898	0	0	0	0	0	0
hsa-mir-935	NA	NA	NA	NA	NA	NA	2	2	0	0	0	0
hsa-mir-887-3p	NA	NA	NA	NA	NA	NA	3	2	0	0	0	0
hsa-mir-877-3p	6.72048	-1.84351	0.15278	NA	NA	NA	1	0	0	0	0	0
hsa-mir-877-5p	107.429	-0.813525	0.170965	38.1159	-0.981385	0.361514	0	0	0	0	0	0
hsa-mir-744-3p	17.5109	0.224046	0.876301	NA	NA	NA	2	2	0	1	1	0
hsa-mir-147b	12.7662	0.0159698	0.992264	31.8724	-0.846558	0.470862	6	5	0	1	0	0
hsa-mir-874-3p	39.8223	-1.18899	0.00593368	11.9485	-2.07659	0.252469	6	6	0	0	0	0
hsa-mir-450b-5p	576.772	-0.152404	0.797373	667.29	0.0353637	0.973026	1	0	0	0	0	0
hsa-mir-671-3p	697.38	0.197463	0.699138	497.322	0.492912	0.400777	0	0	0	0	0	0
hsa-mir-548d-5p	5.7502	-0.333898	0.894445	NA	NA	NA	1	1	0	0	0	0
hsa-mir-628-5p	10.2047	0.176653	0.947547	NA	NA	NA	3	1	0	0	0	0
hsa-mir-625-3p	341.629	1.28977	5.15e-10	336.347	0.742076	0.218096	1	1	0	0	0	0
hsa-mir-550a-5p	NA	NA	NA	NA	NA	NA	2	2	0	0	1	0
hsa-mir-92b-5p	26.9153	0.715731	0.388512	19.3925	0.0763234	0.973026	0	0	0	0	0	0
hsa-mir-455-3p	1026.24	0.0849899	0.913392	633.376	0.0397991	0.973026	7	7	0	0	1	0
hsa-mir-532-3p	164.95	-0.521592	0.107203	61.9002	-0.0977858	0.973026	0	0	0	0	0	0
hsa-mir-505-5p	NA	NA	NA	NA	NA	NA	0	0	0	0	0	0
hsa-mir-502-3p	537.964	0.0540179	0.952057	133.564	0.0301483	0.973026	1	1	0	0	0	0
hsa-mir-501-3p	922.407	-0.159343	0.758917	413.106	0.104155	0.95236	0	0	0	0	0	0
hsa-mir-500a-5p	NA	NA	NA	NA	NA	NA	3	3	0	0	0	0
hsa-mir-193b-5p	25.2197	-0.0105164	0.992842	14.7998	-0.349128	0.939549	1	1	0	0	0	0
hsa-mir-423-5p	5774.32	-0.257867	0.602709	4615.5	-0.464944	0.446325	2	2	1	0	0	0
hsa-mir-339-3p	188.138	0.366164	0.356549	124.077	-0.296583	0.810307	3	3	0	0	0	0
hsa-mir-331-5p	163.519	-0.0814632	0.926326	113.007	-0.718057	0.278404	0	0	0	0	0	0
hsa-mir-342-5p	8.90761	0.384372	0.851773	12.3439	-0.781133	0.809572	2	1	0	0	0	0
hsa-mir-330-5p	27.3255	-0.136546	0.927868	53.4387	-0.737531	0.343315	5	4	0	1	0	1
hsa-mir-374a-3p	4000.07	0.27462	0.52724	641.252	0.15938	0.949402	1	1	0	0	0	1
hsa-mir-361-3p	NA	NA	NA	NA	NA	NA	1	1	1	0	0	0
hsa-mir-26a-2-3p	24.2867	0.101403	0.960101	NA	NA	NA	0	0	0	0	0	0
hsa-mir-130b-5p	3897.92	-0.355157	0.177532	3328.36	0.406976	0.400777	0	0	0	0	0	0
hsa-mir-99b-3p	2114.05	0.0246354	0.965657	1183.5	-0.441916	0.307069	1	1	0	0	0	0
hsa-mir-29c-5p	5.37555	0.708562	0.728871	NA	NA	NA	4	3	0	0	1	1
hsa-mir-106b-3p	8615.29	0.460799	0.0652281	5233.03	-0.051967	0.973026	2	2	0	0	0	0
hsa-mir-188-3p	5.48208	-0.0612744	0.992264	NA	NA	NA	1	1	0	0	0	0
hsa-mir-186-3p	NA	NA	NA	NA	NA	NA	0	0	0	0	0	0
hsa-mir-185-3p	180.086	-0.227512	0.647911	105.082	-0.642575	0.358822	2	2	0	0	0	0
hsa-mir-146a-3p	16.608	-0.53711	0.620238	10.7038	1.06825	0.637578	2	1	0	0	0	0
hsa-mir-125b-2-3p	803.878	0.160054	0.800311	356.937	-0.0834227	0.970638	1	1	0	0	0	0
hsa-mir-132-5p	2.40446	-0.407015	0.926326	NA	NA	NA	1	1	0	0	0	0
hsa-mir-27b-5p	622.359	-0.0969502	0.867015	232.044	0.304727	0.681898	4	4	0	0	0	1
hsa-mir-15b-3p	271.98	0.29023	0.646124	125.42	-0.124556	0.964049	5	5	0	0	0	0
hsa-let-7g-3p	NA	NA	NA	NA	NA	NA	2	0	0	0	0	0
hsa-mir-221-5p	932.25	0.456141	0.090496	502.251	-0.0239864	0.973026	6	5	0	0	1	1
hsa-mir-218-1-3p	NA	NA	NA	NA	NA	NA	2	2	0	1	0	0
hsa-mir-196a-3p	23.6583	0.67077	0.462224	NA	NA	NA	1	1	0	0	0	0
hsa-mir-183-3p	19.9447	-0.0354901	0.991009	11.7068	0.233345	0.973026	1	0	0	0	0	0
hsa-mir-181c-3p	40.5074	0.820397	0.268335	NA	NA	NA	0	0	0	0	0	0
hsa-mir-181a-2-3p	1481.56	-0.943876	0.000696714	730.299	0.566855	0.504162	0	0	0	0	0	0
hsa-mir-10b-3p	14.4271	-6.97737	1.54e-06	NA	NA	NA	3	3	0	1	0	0
hsa-mir-10a-3p	NA	NA	NA	NA	NA	NA	3	2	0	0	0	0
hsa-mir-7-1-3p	61.3049	0.367105	0.609663	12.2871	-1.14711	0.513474	4	3	0	0	0	0
hsa-mir-30d-3p	44.8748	-0.469043	0.509278	17.9636	0.313509	0.928744	1	0	0	0	0	0
hsa-mir-139-3p	NA	NA	NA	NA	NA	NA	3	3	0	0	0	0
hsa-mir-30c-2-3p	60.3723	-0.0609387	0.960101	23.0861	-0.0285347	0.987104	5	5	0	0	0	2
hsa-mir-148a-5p	1970.39	0.122439	0.867015	995.216	1.1997	0.00467624	6	5	0	1	0	0
hsa-mir-129-1-3p	NA	NA	NA	NA	NA	NA	3	3	0	0	0	0
hsa-mir-29b-2-5p	NA	NA	NA	NA	NA	NA	0	0	0	0	0	0
hsa-mir-99a-3p	13.166	-0.28156	0.860777	NA	NA	NA	0	0	0	0	0	0
hsa-mir-93-3p	121.733	0.151224	0.812993	47.5167	0.106731	0.973026	5	4	0	1	1	0
hsa-mir-92a-1-5p	111.575	0.158928	0.835001	32.5645	0.248599	0.941534	1	1	0	0	0	0
hsa-mir-33a-3p	117.379	0.0623003	0.954724	64.4603	0.0324298	0.974379	4	4	0	0	0	1
hsa-mir-28-3p	9559.8	0.502996	0.0914586	7357.81	0.0849742	0.949402	2	2	0	0	0	0
hsa-mir-26b-3p	17.3614	-0.0487891	0.978144	NA	NA	NA	2	0	0	0	0	0
hsa-mir-25-5p	432.309	0.493738	0.150447	161.914	0.30971	0.834121	3	2	0	0	0	0
hsa-mir-23a-5p	NA	NA	NA	NA	NA	NA	5	4	0	0	1	0
hsa-mir-22-5p	191.862	0.155598	0.826436	156.211	-0.399909	0.677963	2	2	0	0	0	0
hsa-mir-21-3p	890.439	0.738737	0.0409317	169.328	-1.38365	0.00636119	11	10	0	1	2	0
hsa-mir-20a-3p	11.9875	-0.413147	0.797373	NA	NA	NA	5	4	0	0	1	0
hsa-mir-19a-5p	NA	NA	NA	NA	NA	NA	4	4	0	0	1	0
hsa-mir-15a-3p	NA	NA	NA	NA	NA	NA	4	2	0	0	1	0
hsa-let-7f-2-3p	4.88314	0.963276	0.602709	NA	NA	NA	0	0	0	0	0	0
hsa-let-7f-1-3p	NA	NA	NA	NA	NA	NA	0	0	0	0	0	0
hsa-let-7d-3p	NA	NA	NA	NA	NA	NA	0	0	0	0	0	0
hsa-let-7c*	NA	NA	NA	NA	NA	NA	0	0	0	0	0	0
hsa-let-7b-3p	NA	NA	NA	NA	NA	NA	1	1	0	0	0	0
hsa-let-7a-3p	15.2146	-0.612505	0.614362	10.2933	1.06133	0.677963	4	2	0	0	0	0
hsa-mir-769-3p	38.2908	0.0216562	0.992264	29.5338	0.750293	0.637578	0	0	0	0	0	0
hsa-mir-454-5p	50.8872	-0.2184	0.840144	17.3126	0.725224	0.77969	0	0	0	0	0	0
hsa-mir-660-5p	586.05	-0.282722	0.480387	78.4826	-0.054425	0.973026	1	1	0	0	0	0
hsa-mir-641	91.9349	-0.321261	0.575602	52.0702	-0.705742	0.479629	1	1	0	0	0	0
hsa-mir-636	2.63712	-1.71563	0.536724	NA	NA	NA	1	1	0	0	0	0
hsa-mir-629-3p	53.5529	0.275728	0.739986	19.0566	1.1165	0.346336	0	0	0	0	0	0
hsa-mir-628-3p	16.0066	-0.278756	0.852534	15.1589	-0.688885	0.760715	1	1	0	0	1	0
hsa-mir-624-5p	21.0485	-0.0997883	0.960101	10.1269	0.680391	0.810307	0	0	0	0	0	0
hsa-mir-618	549.098	0.103648	0.867015	399.037	0.280968	0.77969	0	0	0	0	0	0
hsa-mir-616-5p	5.01608	-1.01662	0.647911	NA	NA	NA	1	1	0	0	0	0
hsa-mir-598-3p	NA	NA	NA	NA	NA	NA	0	0	0	0	0	0
hsa-mir-597-5p	NA	NA	NA	NA	NA	NA	0	0	0	0	0	0
hsa-mir-550a-3p	NA	NA	NA	NA	NA	NA	2	2	1	0	0	0
hsa-mir-589-3p	NA	NA	NA	NA	NA	NA	0	0	0	0	0	0
hsa-mir-548a-3p	NA	NA	NA	NA	NA	NA	1	1	0	0	0	0
hsa-mir-577	21.8015	-0.0942961	0.960101	NA	NA	NA	2	0	0	0	0	0
hsa-mir-576-5p	93.2667	0.264322	0.739986	35.2055	1.20259	0.253404	0	0	0	0	0	0
hsa-mir-574-3p	597.977	0.125444	0.812993	305.647	0.548532	0.307069	8	8	0	1	1	1
hsa-mir-551b-3p	13.4974	2.1624	0.00234964	NA	NA	NA	0	0	0	0	0	0
hsa-mir-455-5p	2341.37	-0.0263565	0.965657	1633.41	-0.852253	0.0928127	3	3	0	0	1	0
hsa-mir-500a-3p	1770.33	-0.272263	0.610465	530.351	-0.0928812	0.973026	0	0	0	0	0	0
hsa-mir-191-3p	30.1853	-0.0607736	0.962051	23.817	0.0467171	0.973902	0	0	0	0	0	0
hsa-mir-425-3p	185.205	0.506913	0.146421	78.7405	0.0340015	0.973026	0	0	0	0	0	0
hsa-mir-340-3p	50.1525	-0.0402896	0.969116	70.5436	-0.418656	0.714415	1	1	0	0	0	0
hsa-mir-362-5p	197.436	-0.301897	0.474548	70.3983	0.222531	0.900673	2	2	0	0	0	0
hsa-mir-187-3p	22.7118	-0.0200726	0.992264	38.5355	-0.24946	0.92979	7	5	0	0	0	0
hsa-mir-182-3p	16.339	-0.455272	0.736535	NA	NA	NA	5	4	0	0	0	1
hsa-mir-2116-3p	18.0009	0.233146	0.867015	15.5093	0.728867	0.772685	0	0	0	0	0	0
hsa-mir-548q	NA	NA	NA	NA	NA	NA	0	0	0	0	0	0
hsa-mir-449c-3p	NA	NA	NA	NA	NA	NA	0	0	0	0	0	0
hsa-mir-3117-3p	NA	NA	NA	NA	NA	NA	0	0	0	0	0	0
hsa-mir-3127-5p	6.55375	-1.08942	0.487291	NA	NA	NA	4	4	0	0	0	0
hsa-mir-3131	7.55545	-0.372309	0.867015	NA	NA	NA	0	0	0	0	0	0
hsa-mir-3140-3p	7.16679	0.160876	0.960101	NA	NA	NA	0	0	0	0	0	0
hsa-mir-3144-3p	103.535	0.0401665	0.965657	49.9562	0.747305	0.365235	0	0	0	0	0	0
hsa-mir-548v	7.46702	0.0191087	0.992264	NA	NA	NA	0	0	0	0	0	0
hsa-mir-3157-5p	5.0604	0.483526	0.852534	NA	NA	NA	0	0	0	0	0	0
hsa-mir-1260b	278.672	0.775317	0.0169043	91.2311	0.39268	0.810307	3	1	0	0	0	0
hsa-mir-3176	13.0962	0.114819	0.960101	23.3503	0.18541	0.973026	0	0	0	0	0	0
hsa-mir-3177-3p	24.1209	-0.692849	0.43478	14.1212	0.144589	0.973026	0	0	0	0	0	0
hsa-mir-3181	NA	NA	NA	NA	NA	NA	0	0	0	0	0	0
hsa-mir-3065-5p	NA	NA	NA	NA	NA	NA	0	0	0	0	0	0
hsa-mir-3187-3p	75.9323	-0.678063	0.126697	49.8354	0.348047	0.834121	0	0	0	0	0	0
hsa-mir-3188	NA	NA	NA	NA	NA	NA	1	1	0	0	0	1
hsa-mir-320e	25.8192	-0.226224	0.852534	194.538	-0.757033	0.478333	0	0	0	0	0	0
hsa-mir-3196	4.79131	0.213623	0.960101	32.7836	-0.293877	0.949402	1	0	0	0	0	0
hsa-mir-3198	NA	NA	NA	NA	NA	NA	0	0	0	0	0	0
hsa-mir-3200-3p	NA	NA	NA	NA	NA	NA	0	0	0	0	0	0
hsa-mir-3065-3p	NA	NA	NA	NA	NA	NA	0	0	0	0	0	0
hsa-mir-378c	354.087	0.445395	0.602709	127.603	0.0462641	0.973026	0	0	0	0	0	0
hsa-mir-4323	NA	NA	NA	NA	NA	NA	0	0	0	0	0	0
hsa-mir-4324	10.1839	0.219441	0.925082	NA	NA	NA	0	0	0	0	0	0
hsa-mir-4326	545.207	-0.46124	0.106464	406.172	0.452129	0.495435	0	0	0	0	0	0
hsa-mir-4284	64.6299	-0.174849	0.851773	128.771	-1.38116	0.0117738	1	1	0	0	0	1
hsa-mir-4286	92.8644	-0.690553	0.108877	17.766	1.43426	0.307069	0	0	0	0	0	0
hsa-mir-2277-5p	134.534	0.902756	0.00224471	91.6817	0.0670699	0.973026	0	0	0	0	0	0
hsa-mir-3605-3p	26.7882	-0.219798	0.867015	30.2471	0.0958554	0.973026	0	0	0	0	0	0
hsa-mir-3615	1940.95	-0.465472	0.068988	1260.49	0.400138	0.400777	0	0	0	0	0	0
hsa-mir-3619-5p	NA	NA	NA	NA	NA	NA	1	1	0	0	0	0
hsa-mir-3620-3p	NA	NA	NA	NA	NA	NA	0	0	0	0	0	0
hsa-mir-3622a-3p	NA	NA	NA	NA	NA	NA	0	0	0	0	0	0
hsa-mir-3648	17.229	-0.0352604	0.992264	23.7043	0.25167	0.949402	0	0	0	0	0	0
hsa-mir-3663-3p	NA	NA	NA	NA	NA	NA	0	0	0	0	0	0
hsa-mir-3676-3p	NA	NA	NA	NA	NA	NA	0	0	0	0	0	0
hsa-mir-3679-3p	NA	NA	NA	NA	NA	NA	0	0	0	0	0	0
hsa-mir-3687	6.96985	-0.33975	0.867015	NA	NA	NA	0	0	0	0	0	0
hsa-mir-3691-5p	17.7276	-0.618588	0.555191	17.9163	-1.00244	0.550259	0	0	0	0	0	0
hsa-mir-3909	332.482	-0.415268	0.255335	132.919	-0.290758	0.77969	0	0	0	0	0	0
hsa-mir-3928-3p	32.2399	-0.418059	0.620238	14.1956	0.614984	0.810307	1	1	0	0	0	0
hsa-mir-3929	27.3226	0.576721	0.474281	10.7584	0.41757	0.900673	0	0	0	0	0	0
hsa-mir-3934-5p	7.26497	0.145811	0.960101	NA	NA	NA	0	0	0	0	0	0
hsa-mir-3943	NA	NA	NA	NA	NA	NA	0	0	0	0	0	0
hsa-mir-548aa	558.788	1.35617	8.13e-12	564.292	-0.5601	0.358822	0	0	0	0	0	0
hsa-mir-493-3p	NA	NA	NA	NA	NA	NA	5	5	1	0	1	1
hsa-mir-381-3p	NA	NA	NA	NA	NA	NA	10	6	0	0	0	0
hsa-mir-27a-5p	548.606	0.249337	0.62407	134	0.40206	0.793584	8	6	0	0	0	0
hsa-mir-218-2-3p	NA	NA	NA	NA	NA	NA	3	2	0	0	0	0
hsa-mir-4723-5p	NA	NA	NA	NA	NA	NA	1	1	0	0	0	1
hsa-mir-490-5p	NA	NA	NA	NA	NA	NA	4	4	0	0	0	0
hsa-mir-761	NA	NA	NA	NA	NA	NA	1	1	0	0	0	0
hsa-mir-1291	2211.54	0.204872	0.572457	119.3	0.611223	0.451418	3	3	0	0	0	0
hsa-mir-543	NA	NA	NA	NA	NA	NA	9	6	0	1	0	0
hsa-mir-518c-3p	NA	NA	NA	NA	NA	NA	3	3	0	0	0	0
hsa-mir-150-3p	NA	NA	NA	NA	NA	NA	6	6	0	0	0	1
hsa-mir-371a-5p	NA	NA	NA	NA	NA	NA	2	1	0	1	0	0
hsa-mir-486-3p	NA	NA	NA	NA	NA	NA	6	4	0	0	1	0
hsa-mir-591	NA	NA	NA	NA	NA	NA	1	1	0	0	0	0
hsa-mir-452-5p	NA	NA	NA	NA	NA	NA	7	7	0	0	1	1
hsa-mir-570-3p	NA	NA	NA	NA	NA	NA	1	1	0	0	0	0
hsa-mir-551a	NA	NA	NA	NA	NA	NA	2	2	0	0	0	0
hsa-mir-300	NA	NA	NA	NA	NA	NA	6	5	0	1	2	0
hsa-mir-539-5p	NA	NA	NA	NA	NA	NA	6	3	0	1	0	0
hsa-mir-544a	NA	NA	NA	NA	NA	NA	5	5	0	0	2	1
hsa-mir-1207-5p	NA	NA	NA	NA	NA	NA	5	5	0	0	2	0
hsa-mir-1266-5p	31.4323	-0.541937	0.482258	14.3279	-0.118355	0.973026	1	1	0	0	0	0
hsa-mir-143-5p	NA	NA	NA	NA	NA	NA	2	1	0	0	0	0
hsa-mir-1246	1360.36	0.573563	0.0216662	7134.56	-0.336376	0.816726	5	5	0	0	0	2
hsa-mir-4448	18.1097	-0.488711	0.73199	38.72	-0.309995	0.900673	1	1	0	1	0	0
hsa-mir-382-5p	14.8814	0.294078	0.835197	NA	NA	NA	5	4	1	0	0	0
hsa-mir-580-3p	32.6551	0.626941	0.602709	NA	NA	NA	1	0	0	0	0	0
hsa-mir-34c-3p	NA	NA	NA	NA	NA	NA	8	8	0	0	1	2
hsa-mir-1202	NA	NA	NA	NA	NA	NA	1	0	0	0	0	0
hsa-mir-575	NA	NA	NA	NA	NA	NA	0	0	0	0	0	0
hsa-mir-520d-3p	NA	NA	NA	NA	NA	NA	1	1	0	0	0	0
hsa-mir-513b-5p	NA	NA	NA	NA	NA	NA	4	3	0	0	0	0
hsa-mir-410-3p	NA	NA	NA	NA	NA	NA	10	10	1	0	0	1
hsa-mir-645	NA	NA	NA	NA	NA	NA	1	1	0	0	1	0
hsa-mir-135b-3p	NA	NA	NA	NA	NA	NA	3	2	0	0	0	0
hsa-mir-508-5p	NA	NA	NA	NA	NA	NA	3	3	1	0	1	0
hsa-mir-329-3p	NA	NA	NA	NA	NA	NA	8	7	0	0	0	0
hsa-mir-1182	NA	NA	NA	NA	NA	NA	1	1	0	0	0	0
hsa-mir-4782-3p	NA	NA	NA	NA	NA	NA	3	3	0	0	0	1
hsa-mir-655-3p	NA	NA	NA	NA	NA	NA	6	5	0	0	2	0
hsa-mir-513c-5p	NA	NA	NA	NA	NA	NA	3	2	0	0	0	0
hsa-mir-518a-3p	NA	NA	NA	NA	NA	NA	1	1	0	0	0	0
hsa-mir-190b	5.28753	0.207839	0.954724	NA	NA	NA	4	2	0	0	0	0
hsa-mir-656-3p	NA	NA	NA	NA	NA	NA	1	1	0	0	0	0
hsa-mir-4437	NA	NA	NA	NA	NA	NA	1	0	0	0	0	0
hsa-mir-4674	NA	NA	NA	NA	NA	NA	1	0	0	0	0	0
hsa-mir-4722-5p	NA	NA	NA	NA	NA	NA	1	0	0	0	0	0
hsa-mir-525-3p	NA	NA	NA	NA	NA	NA	4	4	0	0	0	0
hsa-mir-4516	NA	NA	NA	NA	NA	NA	1	1	0	0	0	0
hsa-mir-1289	6.2782	-0.241905	0.936961	10.9246	0.970234	0.659964	1	0	0	0	0	0
hsa-mir-921	NA	NA	NA	NA	NA	NA	1	0	0	0	0	0
hsa-mir-581	27.3787	-0.342739	0.747819	34.2073	-0.0838337	0.973026	2	2	0	0	0	0
hsa-mir-526b-3p	NA	NA	NA	NA	NA	NA	2	1	0	0	0	0
hsa-mir-4272	NA	NA	NA	NA	NA	NA	0	0	0	0	0	0
hsa-mir-7159-5p	NA	NA	NA	NA	NA	NA	0	0	0	0	0	0
hsa-mir-6758-5p	NA	NA	NA	NA	NA	NA	0	0	0	0	0	0
hsa-mir-6856-5p	NA	NA	NA	NA	NA	NA	0	0	0	0	0	0
hsa-mir-3190-3p	12.7058	-0.0183884	0.992264	15.4488	0.119628	0.973026	0	0	0	0	0	0
hsa-mir-3661	11.6605	-0.783482	0.551991	NA	NA	NA	0	0	0	0	0	0
hsa-mir-4502	5.47594	-1.13321	0.54752	NA	NA	NA	0	0	0	0	0	0
hsa-mir-6833-5p	NA	NA	NA	NA	NA	NA	0	0	0	0	0	0
hsa-mir-7114-5p	NA	NA	NA	NA	NA	NA	0	0	0	0	0	0
hsa-mir-607	NA	NA	NA	NA	NA	NA	0	0	0	0	0	0
hsa-mir-944	8.91993	0.730206	0.646124	NA	NA	NA	4	4	0	0	0	0
hsa-mir-4262	NA	NA	NA	NA	NA	NA	1	1	0	0	0	1
hsa-mir-3671	NA	NA	NA	NA	NA	NA	0	0	0	0	0	0
hsa-mir-6865-3p	NA	NA	NA	NA	NA	NA	0	0	0	0	0	0
hsa-mir-7853-5p	NA	NA	NA	NA	NA	NA	0	0	0	0	0	0
hsa-mir-548c-3p	NA	NA	NA	NA	NA	NA	2	1	0	0	1	0
hsa-mir-3148	23.1468	1.78841	0.0024964	44.3834	0.313832	0.862796	0	0	0	0	0	0
hsa-mir-4668-5p	NA	NA	NA	NA	NA	NA	0	0	0	0	0	0
hsa-mir-4668-3p	NA	NA	NA	NA	NA	NA	0	0	0	0	0	0
hsa-mir-5584-5p	7.26785	1.0217	0.493704	12.1357	-0.533726	0.834121	0	0	0	0	0	0
hsa-mir-5680	NA	NA	NA	NA	NA	NA	0	0	0	0	0	0
hsa-mir-635	NA	NA	NA	NA	NA	NA	0	0	0	0	0	0
hsa-mir-4524a-5p	NA	NA	NA	NA	NA	NA	0	0	0	0	0	0
hsa-mir-4642	NA	NA	NA	NA	NA	NA	0	0	0	0	0	0
hsa-mir-4524b-5p	NA	NA	NA	NA	NA	NA	0	0	0	0	0	0
hsa-mir-6774-5p	NA	NA	NA	NA	NA	NA	0	0	0	0	0	0
hsa-mir-222-5p	11.0661	0.578225	0.728871	NA	NA	NA	2	1	0	0	0	0
hsa-mir-367-3p	NA	NA	NA	NA	NA	NA	4	4	0	0	0	0
hsa-mir-3163	44.9804	1.3631	0.00593368	26.9116	0.349183	0.876094	3	3	0	0	0	0
hsa-mir-548j-3p	NA	NA	NA	NA	NA	NA	0	0	0	0	0	0
hsa-mir-548x-3p	552.211	-3.55891	5.07e-54	90.5883	0.0960715	0.973026	0	0	0	0	0	0
hsa-mir-548ae-3p	16.615	-2.01629	0.00313565	NA	NA	NA	0	0	0	0	0	0
hsa-mir-548ah-3p	24.653	-0.395287	0.701025	10.8781	1.17875	0.526589	0	0	0	0	0	0
hsa-mir-548aj-3p	2.32812	-3.18976	0.228217	NA	NA	NA	0	0	0	0	0	0
hsa-mir-548am-3p	19.5655	0.137924	0.94647	NA	NA	NA	0	0	0	0	0	0
hsa-mir-548aq-3p	34.546	0.496471	0.530348	NA	NA	NA	0	0	0	0	0	0
hsa-mir-5582-3p	8.87789	0.172926	0.954724	NA	NA	NA	0	0	0	0	0	0
hsa-mir-513b-3p	NA	NA	NA	NA	NA	NA	0	0	0	0	0	0
hsa-mir-3662	28.0209	-0.613874	0.551991	NA	NA	NA	0	0	0	0	0	0
hsa-mir-6826-3p	NA	NA	NA	NA	NA	NA	0	0	0	0	0	0
hsa-mir-548m	NA	NA	NA	NA	NA	NA	1	1	0	0	0	0
hsa-mir-3653-3p	27.2971	0.100731	0.955464	NA	NA	NA	0	0	0	0	0	0
hsa-mir-3658	NA	NA	NA	NA	NA	NA	0	0	0	0	0	0
hsa-mir-4436b-5p	NA	NA	NA	NA	NA	NA	0	0	0	0	0	0
hsa-mir-5197-3p	NA	NA	NA	NA	NA	NA	0	0	0	0	0	0
hsa-mir-5579-3p	NA	NA	NA	NA	NA	NA	0	0	0	0	0	0
hsa-mir-6509-3p	NA	NA	NA	NA	NA	NA	0	0	0	0	0	0
hsa-mir-1825	NA	NA	NA	NA	NA	NA	0	0	0	0	0	0
hsa-mir-548t-5p	NA	NA	NA	NA	NA	NA	0	0	0	0	0	0
hsa-mir-3189-5p	NA	NA	NA	NA	NA	NA	0	0	0	0	0	0
hsa-mir-4676-5p	NA	NA	NA	NA	NA	NA	0	0	0	0	0	0
hsa-mir-371b-3p	NA	NA	NA	NA	NA	NA	0	0	0	0	0	0
hsa-mir-4758-3p	NA	NA	NA	NA	NA	NA	0	0	0	0	0	0
hsa-mir-4786-3p	NA	NA	NA	NA	NA	NA	0	0	0	0	0	0
hsa-mir-5699-5p	4.11415	-0.564793	0.835001	NA	NA	NA	0	0	0	0	0	0
hsa-mir-6124	NA	NA	NA	NA	NA	NA	0	0	0	0	0	0
hsa-mir-548az-5p	150.233	1.19901	1.78e-06	192.982	-0.00613794	0.994803	0	0	0	0	0	0
hsa-mir-6796-5p	NA	NA	NA	NA	NA	NA	0	0	0	0	0	0
hsa-mir-98-3p	NA	NA	NA	NA	NA	NA	3	2	0	0	0	0
hsa-mir-379-3p	NA	NA	NA	NA	NA	NA	0	0	0	0	0	0
hsa-mir-380-3p	NA	NA	NA	NA	NA	NA	0	0	0	0	0	0
hsa-mir-411-3p	NA	NA	NA	NA	NA	NA	0	0	0	0	0	0
hsa-mir-3942-5p	13.795	0.640316	0.583416	11.8206	0.225786	0.973026	0	0	0	0	0	0
hsa-mir-4495	NA	NA	NA	NA	NA	NA	0	0	0	0	0	0
hsa-mir-4703-5p	NA	NA	NA	NA	NA	NA	0	0	0	0	0	0
hsa-mir-6838-5p	NA	NA	NA	NA	NA	NA	0	0	0	0	0	0
hsa-mir-8062	NA	NA	NA	NA	NA	NA	0	0	0	0	0	0
hsa-mir-8079	NA	NA	NA	NA	NA	NA	0	0	0	0	0	0
hsa-mir-4717-3p	NA	NA	NA	NA	NA	NA	0	0	0	0	0	0
hsa-mir-5011-5p	NA	NA	NA	NA	NA	NA	0	0	0	0	0	0
hsa-mir-942-3p	10.4969	0.646305	0.646124	NA	NA	NA	2	1	0	0	0	0
hsa-mir-4789-5p	NA	NA	NA	NA	NA	NA	0	0	0	0	0	0
hsa-mir-4729	NA	NA	NA	NA	NA	NA	0	0	0	0	0	0
hsa-mir-5700	NA	NA	NA	NA	NA	NA	0	0	0	0	0	0
hsa-mir-4426	NA	NA	NA	NA	NA	NA	0	0	0	0	0	0
hsa-mir-4451	NA	NA	NA	NA	NA	NA	0	0	0	0	0	0
hsa-mir-4647	NA	NA	NA	NA	NA	NA	0	0	0	0	0	0
hsa-mir-4662b	NA	NA	NA	NA	NA	NA	0	0	0	0	0	0
hsa-mir-4775	6.53867	0.278315	0.913392	NA	NA	NA	1	1	0	0	0	0
hsa-mir-190a-3p	NA	NA	NA	NA	NA	NA	0	0	0	0	0	0
hsa-mir-634	NA	NA	NA	NA	NA	NA	1	0	0	0	0	0
hsa-mir-1179	NA	NA	NA	NA	NA	NA	0	0	0	0	0	0
hsa-mir-4310	NA	NA	NA	NA	NA	NA	0	0	0	0	0	0
hsa-mir-5697	3.63261	0.84926	0.736535	NA	NA	NA	0	0	0	0	0	0
hsa-mir-7157-5p	NA	NA	NA	NA	NA	NA	0	0	0	0	0	0
hsa-mir-372-5p	NA	NA	NA	NA	NA	NA	0	0	0	0	0	0
hsa-mir-373-5p	NA	NA	NA	NA	NA	NA	0	0	0	0	0	0
hsa-mir-371b-5p	NA	NA	NA	NA	NA	NA	0	0	0	0	0	0
hsa-mir-6883-3p	NA	NA	NA	NA	NA	NA	0	0	0	0	0	0
hsa-mir-3607-5p	NA	NA	NA	NA	NA	NA	0	0	0	0	0	0
hsa-mir-5197-5p	NA	NA	NA	NA	NA	NA	0	0	0	0	0	0
hsa-mir-570-5p	NA	NA	NA	NA	NA	NA	1	1	0	0	0	0
hsa-mir-548ag	NA	NA	NA	NA	NA	NA	0	0	0	0	0	0
hsa-mir-548ai	NA	NA	NA	NA	NA	NA	0	0	0	0	0	0
hsa-mir-4477a	NA	NA	NA	NA	NA	NA	0	0	0	0	0	0
hsa-mir-4678	NA	NA	NA	NA	NA	NA	0	0	0	0	0	0
hsa-mir-548ba	NA	NA	NA	NA	NA	NA	0	0	0	0	0	0
hsa-mir-548h-3p	NA	NA	NA	NA	NA	NA	0	0	0	0	0	0
hsa-mir-548z	NA	NA	NA	NA	NA	NA	0	0	0	0	0	0
hsa-mir-548ac	NA	NA	NA	NA	NA	NA	0	0	0	0	0	0
hsa-mir-548bb-3p	NA	NA	NA	NA	NA	NA	0	0	0	0	0	0
hsa-mir-4257	NA	NA	NA	NA	NA	NA	0	0	0	0	0	0
hsa-mir-4464	NA	NA	NA	NA	NA	NA	0	0	0	0	0	0
hsa-mir-4748	NA	NA	NA	NA	NA	NA	0	0	0	0	0	0
hsa-mir-5010-3p	100.717	-0.143611	0.852534	128.105	0.41752	0.550259	0	0	0	0	0	0
hsa-mir-5087	NA	NA	NA	NA	NA	NA	0	0	0	0	0	0
hsa-mir-6847-5p	NA	NA	NA	NA	NA	NA	0	0	0	0	0	0
hsa-mir-181b-3p	243.341	-0.310922	0.92287	14.7076	1.27418	0.361514	2	1	0	0	0	0
hsa-mir-181b-2-3p	7.80344	-0.571576	0.798174	NA	NA	NA	1	0	0	0	0	0
hsa-mir-2682-5p	233.14	0.189236	0.715415	316.68	-0.193418	0.900673	0	0	0	0	0	0
hsa-mir-3714	NA	NA	NA	NA	NA	NA	0	0	0	0	0	0
hsa-mir-3920	NA	NA	NA	NA	NA	NA	0	0	0	0	0	0
hsa-mir-4420	NA	NA	NA	NA	NA	NA	0	0	0	0	0	0
hsa-mir-4704-3p	NA	NA	NA	NA	NA	NA	0	0	0	0	0	0
hsa-mir-3691-3p	NA	NA	NA	NA	NA	NA	0	0	0	0	0	0
hsa-mir-4480	NA	NA	NA	NA	NA	NA	0	0	0	0	0	0
hsa-mir-4726-3p	NA	NA	NA	NA	NA	NA	0	0	0	0	0	0
hsa-mir-5588-3p	NA	NA	NA	NA	NA	NA	0	0	0	0	0	0
hsa-mir-6764-5p	NA	NA	NA	NA	NA	NA	0	0	0	0	0	0
hsa-mir-6840-3p	NA	NA	NA	NA	NA	NA	0	0	0	0	0	0
hsa-mir-106a-3p	NA	NA	NA	NA	NA	NA	1	1	0	0	0	0
hsa-mir-1252-3p	NA	NA	NA	NA	NA	NA	0	0	0	0	0	0
hsa-mir-4511	12.6833	0.879585	0.4468	NA	NA	NA	0	0	0	0	0	0
hsa-mir-651-3p	NA	NA	NA	NA	NA	NA	0	0	0	0	0	0
hsa-mir-4270	NA	NA	NA	NA	NA	NA	0	0	0	0	0	0
hsa-mir-4441	NA	NA	NA	NA	NA	NA	0	0	0	0	0	0
hsa-mir-6754-5p	NA	NA	NA	NA	NA	NA	0	0	0	0	0	0
hsa-mir-4684-3p	NA	NA	NA	NA	NA	NA	0	0	0	0	0	0
hsa-mir-4251	NA	NA	NA	NA	NA	NA	0	0	0	0	0	0
hsa-mir-3613-3p	11.718	-0.930277	0.43478	NA	NA	NA	0	0	0	0	0	0
hsa-mir-4699-3p	30.847	1.05981	0.0479081	16.6365	-0.155831	0.973026	0	0	0	0	0	0
hsa-mir-548p	10.56	1.23341	0.192613	NA	NA	NA	2	2	0	0	0	0
hsa-mir-4709-5p	NA	NA	NA	NA	NA	NA	0	0	0	0	0	0
hsa-mir-5590-5p	NA	NA	NA	NA	NA	NA	0	0	0	0	0	0
hsa-mir-512-3p	NA	NA	NA	NA	NA	NA	0	0	0	0	0	0
hsa-mir-302e	NA	NA	NA	NA	NA	NA	0	0	0	0	0	0
hsa-mir-4536-3p	NA	NA	NA	NA	NA	NA	0	0	0	0	0	0
hsa-mir-5590-3p	NA	NA	NA	NA	NA	NA	0	0	0	0	0	0
hsa-mir-6082	NA	NA	NA	NA	NA	NA	0	0	0	0	0	0
hsa-mir-2054	NA	NA	NA	NA	NA	NA	0	0	0	0	0	0
hsa-mir-32-3p	122.714	-0.55161	0.22024	71.0543	0.523503	0.618309	0	0	0	0	0	0
hsa-mir-3190-5p	NA	NA	NA	NA	NA	NA	0	0	0	0	0	0
hsa-mir-1277-5p	13.2204	-0.624759	0.602709	NA	NA	NA	0	0	0	0	0	0
hsa-mir-576-3p	185.323	0.605095	0.141834	147.346	0.206492	0.834121	1	1	0	0	0	0
hsa-mir-767-3p	NA	NA	NA	NA	NA	NA	1	1	0	0	0	0
hsa-mir-4429	24.5419	-0.0360608	0.989724	16.6805	0.57727	0.810307	0	0	0	0	0	0
hsa-mir-4491	NA	NA	NA	NA	NA	NA	0	0	0	0	0	0
hsa-mir-4657	NA	NA	NA	NA	NA	NA	0	0	0	0	0	0
hsa-mir-1205	NA	NA	NA	NA	NA	NA	0	0	0	0	0	0
hsa-mir-548aw	NA	NA	NA	NA	NA	NA	0	0	0	0	0	0
hsa-mir-199b-3p	15.5195	-0.28803	0.851773	NA	NA	NA	2	2	0	0	0	0
hsa-mir-216a-3p	75.1056	-1.12305	0.0576681	83.348	0.0132268	0.993959	0	0	0	0	0	0
hsa-mir-936	NA	NA	NA	NA	NA	NA	0	0	0	0	0	0
hsa-mir-1204	NA	NA	NA	NA	NA	NA	0	0	0	0	0	0
hsa-mir-3129-5p	47.8945	-0.054877	0.960101	33.7003	-1.15252	0.218096	0	0	0	0	0	0
hsa-mir-3147	NA	NA	NA	NA	NA	NA	0	0	0	0	0	0
hsa-mir-3681-3p	NA	NA	NA	NA	NA	NA	0	0	0	0	0	0
hsa-mir-4425	NA	NA	NA	NA	NA	NA	0	0	0	0	0	0
hsa-mir-4435	NA	NA	NA	NA	NA	NA	0	0	0	0	0	0
hsa-mir-8086	46.0954	0.186317	0.852534	20.2744	1.09238	0.366466	0	0	0	0	0	0
hsa-mir-4796-3p	14.789	-0.188161	0.916408	12.8265	0.122518	0.973026	0	0	0	0	0	0
hsa-mir-3609	4.40264	0.779677	0.728871	NA	NA	NA	0	0	0	0	0	0
hsa-mir-548ah-5p	NA	NA	NA	NA	NA	NA	0	0	0	0	0	0
hsa-mir-2115-3p	NA	NA	NA	NA	NA	NA	0	0	0	0	0	0
hsa-mir-6073	51.6175	-0.3837	0.572457	10.3312	0.804366	0.765859	0	0	0	0	0	0
hsa-mir-600	NA	NA	NA	NA	NA	NA	0	0	0	0	0	0
hsa-mir-3686	NA	NA	NA	NA	NA	NA	1	1	0	0	0	0
hsa-mir-4662a-3p	NA	NA	NA	NA	NA	NA	0	0	0	0	0	0
hsa-mir-548b-5p	523.04	-0.806176	0.000738774	821.388	0.106445	0.964049	0	0	0	0	0	0
hsa-mir-548a-5p	NA	NA	NA	NA	NA	NA	1	1	0	0	0	0
hsa-mir-548c-5p	NA	NA	NA	NA	NA	NA	0	0	0	0	0	0
hsa-mir-548n	35.8662	0.393386	0.6526	14.8374	-0.00291172	0.999084	0	0	0	0	0	0
hsa-mir-548i	NA	NA	NA	NA	NA	NA	3	3	0	1	0	0
hsa-mir-548w	4.15231	0.549758	0.835001	NA	NA	NA	0	0	0	0	0	0
hsa-mir-548y	160.473	0.171553	0.798174	75.7888	0.348761	0.818638	0	0	0	0	0	0
hsa-mir-548o-5p	NA	NA	NA	NA	NA	NA	0	0	0	0	0	0
hsa-mir-548ab	5.38277	0.657429	0.736535	NA	NA	NA	0	0	0	0	0	0
hsa-mir-548ad-5p	NA	NA	NA	NA	NA	NA	0	0	0	0	0	0
hsa-mir-548ae-5p	4.79105	-0.153752	0.960101	NA	NA	NA	0	0	0	0	0	0
hsa-mir-548ak	NA	NA	NA	NA	NA	NA	0	0	0	0	0	0
hsa-mir-548am-5p	NA	NA	NA	NA	NA	NA	0	0	0	0	0	0
hsa-mir-548ap-5p	NA	NA	NA	NA	NA	NA	0	0	0	0	0	0
hsa-mir-548aq-5p	NA	NA	NA	NA	NA	NA	0	0	0	0	0	0
hsa-mir-548ar-5p	4.06798	0.0196597	0.992842	NA	NA	NA	0	0	0	0	0	0
hsa-mir-548as-5p	NA	NA	NA	NA	NA	NA	0	0	0	0	0	0
hsa-mir-548au-5p	NA	NA	NA	NA	NA	NA	0	0	0	0	0	0
hsa-mir-548ay-5p	39.3237	0.0593068	0.960101	32.1952	-0.453126	0.810307	0	0	0	0	0	0
hsa-mir-548bb-5p	4.68032	0.50081	0.848693	NA	NA	NA	0	0	0	0	0	0
hsa-mir-195-3p	20.4553	1.24498	0.0453679	17.3852	0.428209	0.874507	2	2	0	0	0	0
hsa-mir-887-5p	NA	NA	NA	NA	NA	NA	0	0	0	0	0	0
hsa-mir-3159	29.6934	0.326617	0.739986	18.6575	-0.669382	0.767994	0	0	0	0	0	0
hsa-mir-6731-5p	NA	NA	NA	NA	NA	NA	0	0	0	0	0	0
hsa-mir-6788-5p	NA	NA	NA	NA	NA	NA	0	0	0	0	0	0
hsa-mir-6867-5p	NA	NA	NA	NA	NA	NA	0	0	0	0	0	0
hsa-mir-8085	NA	NA	NA	NA	NA	NA	0	0	0	0	0	0
hsa-mir-187-5p	NA	NA	NA	NA	NA	NA	2	1	0	0	0	0
hsa-mir-133a-5p	NA	NA	NA	NA	NA	NA	5	3	0	0	0	1
hsa-mir-586	NA	NA	NA	NA	NA	NA	0	0	0	0	0	0
hsa-mir-4490	NA	NA	NA	NA	NA	NA	0	0	0	0	0	0
hsa-mir-4666a-5p	NA	NA	NA	NA	NA	NA	0	0	0	0	0	0
hsa-mir-6507-5p	NA	NA	NA	NA	NA	NA	0	0	0	0	0	0
hsa-mir-1468-3p	NA	NA	NA	NA	NA	NA	0	0	0	0	0	0
hsa-mir-548f-5p	NA	NA	NA	NA	NA	NA	0	0	0	0	0	0
hsa-mir-548g-5p	NA	NA	NA	NA	NA	NA	0	0	0	0	0	0
hsa-mir-548x-5p	NA	NA	NA	NA	NA	NA	0	0	0	0	0	0
hsa-mir-4295	NA	NA	NA	NA	NA	NA	2	1	0	0	0	0
hsa-mir-3666	NA	NA	NA	NA	NA	NA	0	0	0	0	0	0
hsa-mir-548aj-5p	NA	NA	NA	NA	NA	NA	0	0	0	0	0	0
hsa-mir-4474-5p	NA	NA	NA	NA	NA	NA	0	0	0	0	0	0
hsa-mir-4698	NA	NA	NA	NA	NA	NA	0	0	0	0	0	0
hsa-mir-4797-3p	13.9441	0.446998	0.728871	NA	NA	NA	0	0	0	0	0	0
hsa-mir-95-5p	NA	NA	NA	NA	NA	NA	1	0	0	0	0	0
hsa-mir-6792-5p	NA	NA	NA	NA	NA	NA	0	0	0	0	0	0
hsa-mir-6793-3p	NA	NA	NA	NA	NA	NA	0	0	0	0	0	0
hsa-mir-4282	NA	NA	NA	NA	NA	NA	0	0	0	0	0	0
hsa-mir-192-3p	317.407	-0.179194	0.757275	321.128	1.11496	0.103143	1	1	0	0	1	0
hsa-mir-4694-5p	NA	NA	NA	NA	NA	NA	0	0	0	0	0	0
hsa-mir-1266-3p	NA	NA	NA	NA	NA	NA	0	0	0	0	0	0
hsa-mir-3117-5p	NA	NA	NA	NA	NA	NA	0	0	0	0	0	0
hsa-mir-3613-5p	203.122	0.162002	0.776436	172.468	1.10474	0.0378676	0	0	0	0	0	0
hsa-mir-7152-5p	NA	NA	NA	NA	NA	NA	0	0	0	0	0	0
hsa-mir-3607-3p	42.3202	-0.0571635	0.960101	NA	NA	NA	0	0	0	0	0	0
hsa-mir-4666a-3p	NA	NA	NA	NA	NA	NA	0	0	0	0	0	0
hsa-mir-1253	NA	NA	NA	NA	NA	NA	1	1	0	0	0	0
hsa-mir-4287	NA	NA	NA	NA	NA	NA	0	0	0	0	0	0
hsa-mir-4503	NA	NA	NA	NA	NA	NA	0	0	0	0	0	0
hsa-mir-4685-3p	NA	NA	NA	NA	NA	NA	0	0	0	0	0	0
hsa-mir-4795-5p	NA	NA	NA	NA	NA	NA	0	0	0	0	0	0
hsa-mir-6770-5p	NA	NA	NA	NA	NA	NA	0	0	0	0	0	0
hsa-mir-7106-3p	NA	NA	NA	NA	NA	NA	0	0	0	0	0	0
hsa-mir-3133	47.2102	0.00859273	0.992264	13.4647	0.242962	0.9714	0	0	0	0	0	0
hsa-mir-2113	NA	NA	NA	NA	NA	NA	0	0	0	0	0	0
hsa-mir-5696	5.86934	0.0163634	0.992842	NA	NA	NA	0	0	0	0	0	0
hsa-mir-1321	NA	NA	NA	NA	NA	NA	0	0	0	0	0	0
hsa-mir-4739	NA	NA	NA	NA	NA	NA	0	0	0	0	0	0
hsa-mir-4756-5p	NA	NA	NA	NA	NA	NA	0	0	0	0	0	0
hsa-mir-6799-5p	NA	NA	NA	NA	NA	NA	0	0	0	0	0	0
hsa-mir-519c-5p	NA	NA	NA	NA	NA	NA	0	0	0	0	0	0
hsa-mir-519b-5p	NA	NA	NA	NA	NA	NA	0	0	0	0	0	0
hsa-mir-523-5p	NA	NA	NA	NA	NA	NA	0	0	0	0	0	0
hsa-mir-518f-5p	NA	NA	NA	NA	NA	NA	0	0	0	0	0	0
hsa-mir-526a	NA	NA	NA	NA	NA	NA	0	0	0	0	0	0
hsa-mir-520c-5p	NA	NA	NA	NA	NA	NA	0	0	0	0	0	0
hsa-mir-518e-5p	NA	NA	NA	NA	NA	NA	0	0	0	0	0	0
hsa-mir-518d-5p	NA	NA	NA	NA	NA	NA	0	0	0	0	0	0
hsa-mir-522-5p	NA	NA	NA	NA	NA	NA	1	0	0	0	0	0
hsa-mir-519a-5p	NA	NA	NA	NA	NA	NA	0	0	0	0	0	0
hsa-mir-3074-3p	4.22404	-0.969626	0.66548	NA	NA	NA	0	0	0	0	0	0
hsa-mir-3944-5p	NA	NA	NA	NA	NA	NA	0	0	0	0	0	0
hsa-let-7a-2-3p	NA	NA	NA	NA	NA	NA	0	0	0	0	0	0
hsa-mir-573	101.569	0.0515736	0.960101	NA	NA	NA	4	3	0	0	1	0
hsa-mir-3123	NA	NA	NA	NA	NA	NA	0	0	0	0	0	0
hsa-mir-3616-5p	NA	NA	NA	NA	NA	NA	0	0	0	0	0	0
hsa-mir-583	NA	NA	NA	NA	NA	NA	0	0	0	0	0	0
hsa-mir-3125	NA	NA	NA	NA	NA	NA	0	0	0	0	0	0
hsa-mir-3916	3.96141	0.533886	0.851773	NA	NA	NA	0	0	0	0	0	0
hsa-mir-6859-5p	NA	NA	NA	NA	NA	NA	0	0	0	0	0	0
hsa-mir-7156-3p	NA	NA	NA	NA	NA	NA	0	0	0	0	0	0
hsa-mir-215-3p	34.053	0.972451	0.0629074	11.4024	-0.165015	0.973026	1	1	0	0	0	0
hsa-mir-503-3p	NA	NA	NA	NA	NA	NA	2	2	0	0	0	0
hsa-mir-548at-5p	3.18705	1.08148	0.681222	NA	NA	NA	0	0	0	0	0	0
hsa-mir-873-5p	NA	NA	NA	NA	NA	NA	3	3	0	0	0	0
hsa-mir-491-3p	NA	NA	NA	NA	NA	NA	3	3	0	0	0	0
hsa-mir-1236-5p	NA	NA	NA	NA	NA	NA	0	0	0	0	0	0
hsa-mir-3164	10.5903	-0.274455	0.879936	13.8819	-0.1961	0.973026	0	0	0	0	0	0
hsa-mir-3192-5p	3.91522	-1.51644	0.473931	NA	NA	NA	0	0	0	0	0	0
hsa-mir-4496	NA	NA	NA	NA	NA	NA	1	1	0	0	1	0
hsa-mir-4738-3p	NA	NA	NA	NA	NA	NA	0	0	0	0	0	0
hsa-mir-6820-3p	NA	NA	NA	NA	NA	NA	0	0	0	0	0	0
hsa-mir-3935	NA	NA	NA	NA	NA	NA	0	0	0	0	0	0
hsa-mir-3646	NA	NA	NA	NA	NA	NA	0	0	0	0	0	0
hsa-mir-5003-3p	NA	NA	NA	NA	NA	NA	0	0	0	0	0	0
hsa-mir-6074	NA	NA	NA	NA	NA	NA	0	0	0	0	0	0
hsa-mir-3923	NA	NA	NA	NA	NA	NA	0	0	0	0	0	0
hsa-mir-4686	NA	NA	NA	NA	NA	NA	0	0	0	0	0	0
hsa-mir-2681-5p	NA	NA	NA	NA	NA	NA	0	0	0	0	0	0
hsa-mir-3654	NA	NA	NA	NA	NA	NA	0	0	0	0	0	0
hsa-mir-548an	NA	NA	NA	NA	NA	NA	0	0	0	0	0	0
hsa-mir-6808-5p	NA	NA	NA	NA	NA	NA	0	0	0	0	0	0
hsa-mir-6893-5p	NA	NA	NA	NA	NA	NA	0	0	0	0	0	0
hsa-mir-520d-5p	NA	NA	NA	NA	NA	NA	1	1	0	0	0	0
hsa-mir-1183	NA	NA	NA	NA	NA	NA	0	0	0	0	0	0
hsa-mir-1278	143.506	-0.192662	0.813323	139.969	0.0092881	0.993959	0	0	0	0	0	0
hsa-mir-1911-5p	NA	NA	NA	NA	NA	NA	0	0	0	0	0	0
hsa-mir-4742-3p	NA	NA	NA	NA	NA	NA	0	0	0	0	0	0
hsa-mir-507	NA	NA	NA	NA	NA	NA	0	0	0	0	0	0
hsa-mir-557	NA	NA	NA	NA	NA	NA	0	0	0	0	0	0
hsa-mir-3680-3p	NA	NA	NA	NA	NA	NA	0	0	0	0	0	0
hsa-mir-135a-3p	22.7828	1.73	0.00491438	NA	NA	NA	1	1	0	0	0	0
hsa-mir-627-3p	8.82965	0.649574	0.656486	NA	NA	NA	0	0	0	0	0	0
hsa-mir-6827-5p	NA	NA	NA	NA	NA	NA	0	0	0	0	0	0
hsa-mir-660-3p	NA	NA	NA	NA	NA	NA	0	0	0	0	0	0
hsa-mir-3189-3p	NA	NA	NA	NA	NA	NA	2	2	0	1	0	0
hsa-mir-3940-5p	NA	NA	NA	NA	NA	NA	2	2	0	1	0	0
hsa-mir-4507	NA	NA	NA	NA	NA	NA	0	0	0	0	0	0
hsa-mir-4691-5p	NA	NA	NA	NA	NA	NA	0	0	0	0	0	0
hsa-mir-5193	NA	NA	NA	NA	NA	NA	0	0	0	0	0	0
hsa-mir-6749-3p	NA	NA	NA	NA	NA	NA	0	0	0	0	0	0
hsa-mir-6792-3p	NA	NA	NA	NA	NA	NA	0	0	0	0	0	0
hsa-mir-6839-3p	NA	NA	NA	NA	NA	NA	0	0	0	0	0	0
hsa-mir-152-5p	3.33169	0.752556	0.776436	NA	NA	NA	4	3	0	0	1	0
hsa-mir-4443	16.3739	-0.0204212	0.992264	44.3348	0.601389	0.681898	0	0	0	0	0	0
hsa-mir-3689d	NA	NA	NA	NA	NA	NA	0	0	0	0	0	0
hsa-mir-6515-5p	5.15481	0.13477	0.965657	NA	NA	NA	0	0	0	0	0	0
hsa-mir-6768-5p	NA	NA	NA	NA	NA	NA	0	0	0	0	0	0
hsa-mir-6851-5p	NA	NA	NA	NA	NA	NA	0	0	0	0	0	0
hsa-mir-6511a-3p	NA	NA	NA	NA	NA	NA	0	0	0	0	0	0
hsa-mir-6515-3p	NA	NA	NA	NA	NA	NA	0	0	0	0	0	0
hsa-mir-6511b-3p	NA	NA	NA	NA	NA	NA	0	0	0	0	0	0
hsa-mir-6784-3p	NA	NA	NA	NA	NA	NA	0	0	0	0	0	0
hsa-mir-6862-3p	NA	NA	NA	NA	NA	NA	0	0	0	0	0	0
hsa-mir-6822-3p	NA	NA	NA	NA	NA	NA	0	0	0	0	0	0
hsa-mir-548t-3p	NA	NA	NA	NA	NA	NA	0	0	0	0	0	0
hsa-mir-548ap-3p	NA	NA	NA	NA	NA	NA	0	0	0	0	0	0
hsa-mir-548as-3p	NA	NA	NA	NA	NA	NA	0	0	0	0	0	0
hsa-mir-548at-3p	NA	NA	NA	NA	NA	NA	0	0	0	0	0	0
hsa-mir-548ay-3p	57.2424	0.47604	0.43478	25.9509	-0.981377	0.354621	0	0	0	0	0	0
hsa-mir-7153-3p	NA	NA	NA	NA	NA	NA	0	0	0	0	0	0
hsa-mir-1200	NA	NA	NA	NA	NA	NA	0	0	0	0	0	0
hsa-mir-544b	NA	NA	NA	NA	NA	NA	0	0	0	0	0	0
hsa-mir-3915	NA	NA	NA	NA	NA	NA	0	0	0	0	0	0
hsa-mir-212-5p	5.9925	-0.575862	0.798174	NA	NA	NA	2	2	0	0	0	0
hsa-mir-365b-5p	35.3765	-0.573443	0.425156	14.9862	0.241382	0.963302	0	0	0	0	0	0
hsa-mir-3199	NA	NA	NA	NA	NA	NA	0	0	0	0	0	0
hsa-mir-6802-5p	NA	NA	NA	NA	NA	NA	0	0	0	0	0	0
hsa-mir-8052	NA	NA	NA	NA	NA	NA	0	0	0	0	0	0
hsa-mir-1283	NA	NA	NA	NA	NA	NA	1	1	0	0	0	0
hsa-mir-664a-5p	23.4458	-0.0900918	0.960101	28.3469	-0.0124823	0.993959	0	0	0	0	0	0
hsa-mir-4306	5.02734	0.753167	0.715415	NA	NA	NA	0	0	0	0	0	0
hsa-mir-2392	NA	NA	NA	NA	NA	NA	0	0	0	0	0	0
hsa-mir-4644	NA	NA	NA	NA	NA	NA	0	0	0	0	0	0
hsa-mir-4794	NA	NA	NA	NA	NA	NA	0	0	0	0	0	0
hsa-mir-6871-5p	NA	NA	NA	NA	NA	NA	0	0	0	0	0	0
hsa-mir-203b-5p	NA	NA	NA	NA	NA	NA	0	0	0	0	0	0
hsa-mir-4774-5p	NA	NA	NA	NA	NA	NA	0	0	0	0	0	0
hsa-mir-6718-5p	NA	NA	NA	NA	NA	NA	0	0	0	0	0	0
hsa-mir-1324	NA	NA	NA	NA	NA	NA	0	0	0	0	0	0
hsa-mir-1912	NA	NA	NA	NA	NA	NA	0	0	0	0	0	0
hsa-mir-500b-3p	78.1411	-0.475138	0.419678	25.199	0.315209	0.889094	0	0	0	0	0	0
hsa-mir-1295b-5p	NA	NA	NA	NA	NA	NA	0	0	0	0	0	0
hsa-mir-4719	3.65183	0.888656	0.709763	NA	NA	NA	0	0	0	0	0	0
hsa-mir-7113-5p	NA	NA	NA	NA	NA	NA	0	0	0	0	0	0
hsa-mir-4465	6.50523	0.762314	0.659692	NA	NA	NA	0	0	0	0	0	0
hsa-mir-4664-5p	NA	NA	NA	NA	NA	NA	0	0	0	0	0	0
hsa-mir-451b	NA	NA	NA	NA	NA	NA	0	0	0	0	0	0
hsa-mir-4463	NA	NA	NA	NA	NA	NA	0	0	0	0	0	0
hsa-mir-4499	NA	NA	NA	NA	NA	NA	0	0	0	0	0	0
hsa-mir-9500	NA	NA	NA	NA	NA	NA	0	0	0	0	0	0
hsa-mir-3184-5p	NA	NA	NA	NA	NA	NA	0	0	0	0	0	0
hsa-mir-3674	NA	NA	NA	NA	NA	NA	0	0	0	0	0	0
hsa-mir-552-5p	NA	NA	NA	NA	NA	NA	1	1	0	0	0	0
hsa-mir-652-5p	52.2535	0.386306	0.583416	NA	NA	NA	0	0	0	0	0	0
hsa-mir-548ao-5p	NA	NA	NA	NA	NA	NA	0	0	0	0	0	0
hsa-mir-548ax	NA	NA	NA	NA	NA	NA	0	0	0	0	0	0
hsa-mir-7854-3p	8.2999	0.23527	0.925082	14.3165	-0.228523	0.973026	0	0	0	0	0	0
hsa-mir-889-5p	NA	NA	NA	NA	NA	NA	0	0	0	0	0	0
hsa-mir-4522	NA	NA	NA	NA	NA	NA	0	0	0	0	0	0
hsa-mir-4671-5p	NA	NA	NA	NA	NA	NA	0	0	0	0	0	0
hsa-mir-4699-5p	5.64612	0.666713	0.733021	NA	NA	NA	0	0	0	0	0	0
hsa-mir-548k	144.915	-0.338041	0.544139	51.4555	-0.526878	0.733872	0	0	0	0	0	0
hsa-mir-3973	NA	NA	NA	NA	NA	NA	0	0	0	0	0	0
hsa-mir-548av-5p	4.41847	0.121205	0.965657	NA	NA	NA	0	0	0	0	0	0
hsa-mir-8054	NA	NA	NA	NA	NA	NA	0	0	0	0	0	0
hsa-mir-6077	NA	NA	NA	NA	NA	NA	0	0	0	0	0	0
hsa-mir-214-5p	NA	NA	NA	NA	NA	NA	7	7	0	0	0	0
hsa-mir-558	NA	NA	NA	NA	NA	NA	3	2	0	0	0	0
hsa-mir-1234-3p	NA	NA	NA	NA	NA	NA	1	1	0	0	0	0
hsa-mir-4694-3p	NA	NA	NA	NA	NA	NA	0	0	0	0	0	0
hsa-mir-1199-3p	NA	NA	NA	NA	NA	NA	0	0	0	0	0	0
hsa-mir-6735-3p	NA	NA	NA	NA	NA	NA	0	0	0	0	0	0
hsa-mir-6748-3p	NA	NA	NA	NA	NA	NA	0	0	0	0	0	0
hsa-mir-6874-5p	NA	NA	NA	NA	NA	NA	0	0	0	0	0	0
hsa-mir-7107-5p	NA	NA	NA	NA	NA	NA	0	0	0	0	0	0
hsa-mir-4311	NA	NA	NA	NA	NA	NA	0	0	0	0	0	0
hsa-mir-4672	NA	NA	NA	NA	NA	NA	0	0	0	0	0	0
hsa-mir-8066	NA	NA	NA	NA	NA	NA	0	0	0	0	0	0
hsa-mir-495-5p	NA	NA	NA	NA	NA	NA	0	0	0	0	0	0
hsa-mir-1178-3p	NA	NA	NA	NA	NA	NA	1	1	1	0	0	0
hsa-mir-4317	NA	NA	NA	NA	NA	NA	0	0	0	0	0	0
hsa-mir-6847-3p	NA	NA	NA	NA	NA	NA	0	0	0	0	0	0
hsa-mir-7159-3p	NA	NA	NA	NA	NA	NA	0	0	0	0	0	0
hsa-let-7c-3p	3.19387	-0.624295	0.867015	NA	NA	NA	2	2	0	0	0	1
hsa-mir-527	NA	NA	NA	NA	NA	NA	0	0	0	0	0	0
hsa-mir-4289	4.32381	-0.559356	0.835001	NA	NA	NA	0	0	0	0	0	0
hsa-mir-4484	7.7873	0.108676	0.965657	NA	NA	NA	0	0	0	0	0	0
hsa-mir-6768-3p	NA	NA	NA	NA	NA	NA	0	0	0	0	0	0
hsa-mir-5688	NA	NA	NA	NA	NA	NA	0	0	0	0	0	0
hsa-mir-4428	NA	NA	NA	NA	NA	NA	0	0	0	0	0	0
hsa-mir-5582-5p	NA	NA	NA	NA	NA	NA	3	3	1	0	1	0
hsa-mir-513c-3p	NA	NA	NA	NA	NA	NA	0	0	0	0	0	0
hsa-mir-3606-3p	NA	NA	NA	NA	NA	NA	0	0	0	0	0	0
hsa-mir-605-3p	NA	NA	NA	NA	NA	NA	0	0	0	0	0	0
hsa-mir-4478	NA	NA	NA	NA	NA	NA	0	0	0	0	0	0
hsa-mir-4493	NA	NA	NA	NA	NA	NA	0	0	0	0	0	0
hsa-mir-4419b	4.11395	0.886868	0.733021	NA	NA	NA	0	0	0	0	0	0
hsa-mir-6126	NA	NA	NA	NA	NA	NA	0	0	0	0	0	0
hsa-mir-6869-5p	NA	NA	NA	NA	NA	NA	0	0	0	0	0	0
hsa-mir-8077	NA	NA	NA	NA	NA	NA	0	0	0	0	0	0
hsa-mir-8485	32.1273	0.445562	0.591479	21.9179	-0.102243	0.973026	0	0	0	0	0	0
hsa-mir-194-3p	634.404	0.175574	0.701025	246.951	-0.753157	0.307069	1	1	0	0	0	0
hsa-mir-4654	NA	NA	NA	NA	NA	NA	0	0	0	0	0	0
hsa-mir-4769-5p	NA	NA	NA	NA	NA	NA	0	0	0	0	0	0
hsa-mir-3529-3p	NA	NA	NA	NA	NA	NA	0	0	0	0	0	0
hsa-mir-6882-5p	NA	NA	NA	NA	NA	NA	0	0	0	0	0	0
hsa-mir-4296	NA	NA	NA	NA	NA	NA	0	0	0	0	0	0
hsa-mir-4322	NA	NA	NA	NA	NA	NA	0	0	0	0	0	0
hsa-mir-4265	NA	NA	NA	NA	NA	NA	0	0	0	0	0	0
hsa-mir-4803	NA	NA	NA	NA	NA	NA	0	0	0	0	0	0
hsa-mir-6748-5p	NA	NA	NA	NA	NA	NA	0	0	0	0	0	0
hsa-mir-6759-5p	NA	NA	NA	NA	NA	NA	0	0	0	0	0	0
hsa-mir-6793-5p	NA	NA	NA	NA	NA	NA	0	0	0	0	0	0
hsa-mir-555	NA	NA	NA	NA	NA	NA	0	0	0	0	0	0
hsa-mir-4671-3p	NA	NA	NA	NA	NA	NA	0	0	0	0	0	0
hsa-mir-646	NA	NA	NA	NA	NA	NA	1	1	0	0	0	0
hsa-mir-548e-5p	NA	NA	NA	NA	NA	NA	0	0	0	0	0	0
hsa-mir-4645-3p	NA	NA	NA	NA	NA	NA	0	0	0	0	0	0
hsa-mir-4768-3p	NA	NA	NA	NA	NA	NA	0	0	0	0	0	0
hsa-mir-8065	NA	NA	NA	NA	NA	NA	0	0	0	0	0	0
hsa-mir-197-5p	13.4676	0.1084	0.960101	NA	NA	NA	1	0	0	0	0	0
hsa-mir-210-5p	7.39659	0.390879	0.852534	NA	NA	NA	2	1	0	0	1	0
hsa-mir-3132	NA	NA	NA	NA	NA	NA	0	0	0	0	0	0
hsa-mir-4319	NA	NA	NA	NA	NA	NA	0	0	0	0	0	0
hsa-mir-4650-3p	NA	NA	NA	NA	NA	NA	0	0	0	0	0	0
hsa-mir-5095	39.9008	0.0616323	0.960101	31.479	0.358191	0.834121	0	0	0	0	0	0
hsa-mir-6755-5p	NA	NA	NA	NA	NA	NA	0	0	0	0	0	0
hsa-mir-7151-3p	NA	NA	NA	NA	NA	NA	0	0	0	0	0	0
hsa-mir-642b-5p	NA	NA	NA	NA	NA	NA	0	0	0	0	0	0
hsa-mir-203a-5p	NA	NA	NA	NA	NA	NA	11	7	0	0	1	0
hsa-mir-619-3p	NA	NA	NA	NA	NA	NA	0	0	0	0	0	0
hsa-mir-1910-3p	NA	NA	NA	NA	NA	NA	0	0	0	0	0	0
hsa-mir-4254	NA	NA	NA	NA	NA	NA	0	0	0	0	0	0
hsa-mir-6511a-5p	NA	NA	NA	NA	NA	NA	0	0	0	0	0	0
hsa-mir-6816-3p	NA	NA	NA	NA	NA	NA	0	0	0	0	0	0
hsa-mir-6798-5p	NA	NA	NA	NA	NA	NA	0	0	0	0	0	0
hsa-mir-4459	13.9776	-0.0578528	0.97521	NA	NA	NA	0	0	0	0	0	0
hsa-mir-4685-5p	NA	NA	NA	NA	NA	NA	0	0	0	0	0	0
hsa-mir-4711-5p	NA	NA	NA	NA	NA	NA	0	0	0	0	0	0
hsa-mir-4733-3p	NA	NA	NA	NA	NA	NA	0	0	0	0	0	0
hsa-mir-4761-3p	NA	NA	NA	NA	NA	NA	0	0	0	0	0	0
hsa-mir-6753-5p	NA	NA	NA	NA	NA	NA	0	0	0	0	0	0
hsa-mir-6837-5p	NA	NA	NA	NA	NA	NA	0	0	0	0	0	0
hsa-mir-6740-5p	NA	NA	NA	NA	NA	NA	0	0	0	0	0	0
hsa-mir-1229-5p	NA	NA	NA	NA	NA	NA	0	0	0	0	0	0
hsa-mir-3162-5p	5.30956	-0.654013	0.797373	NA	NA	NA	0	0	0	0	0	0
hsa-mir-3659	NA	NA	NA	NA	NA	NA	0	0	0	0	0	0
hsa-mir-4506	NA	NA	NA	NA	NA	NA	0	0	0	0	0	0
hsa-mir-4693-3p	NA	NA	NA	NA	NA	NA	0	0	0	0	0	0
hsa-mir-5192	NA	NA	NA	NA	NA	NA	0	0	0	0	0	0
hsa-mir-5682	NA	NA	NA	NA	NA	NA	0	0	0	0	0	0
hsa-mir-6760-5p	NA	NA	NA	NA	NA	NA	0	0	0	0	0	0
hsa-mir-6871-3p	NA	NA	NA	NA	NA	NA	0	0	0	0	0	0
hsa-mir-4747-5p	NA	NA	NA	NA	NA	NA	0	0	0	0	0	0
hsa-mir-5196-5p	NA	NA	NA	NA	NA	NA	0	0	0	0	0	0
hsa-mir-510-3p	NA	NA	NA	NA	NA	NA	0	0	0	0	0	0
hsa-mir-3145-3p	10.388	-1.2767	0.350551	NA	NA	NA	0	0	0	0	0	0
hsa-mir-1250-3p	NA	NA	NA	NA	NA	NA	2	2	0	0	0	0
hsa-mir-3156-5p	NA	NA	NA	NA	NA	NA	0	0	0	0	0	0
hsa-mir-6754-3p	NA	NA	NA	NA	NA	NA	0	0	0	0	0	0
hsa-mir-7161-3p	NA	NA	NA	NA	NA	NA	0	0	0	0	0	0
hsa-mir-6804-5p	NA	NA	NA	NA	NA	NA	0	0	0	0	0	0
hsa-mir-7849-3p	NA	NA	NA	NA	NA	NA	0	0	0	0	0	0
hsa-mir-382-3p	NA	NA	NA	NA	NA	NA	1	1	0	0	0	0
hsa-mir-4706	NA	NA	NA	NA	NA	NA	0	0	0	0	0	0
hsa-mir-4749-5p	NA	NA	NA	NA	NA	NA	0	0	0	0	0	0
hsa-mir-6835-3p	NA	NA	NA	NA	NA	NA	0	0	0	0	0	0
hsa-mir-3925-5p	NA	NA	NA	NA	NA	NA	0	0	0	0	0	0
hsa-mir-4447	NA	NA	NA	NA	NA	NA	0	0	0	0	0	0
hsa-mir-4472	12.3466	0.244089	0.885855	NA	NA	NA	0	0	0	0	0	0
hsa-mir-3976	NA	NA	NA	NA	NA	NA	0	0	0	0	0	0
hsa-mir-6795-5p	NA	NA	NA	NA	NA	NA	0	0	0	0	0	0
hsa-mir-6887-5p	NA	NA	NA	NA	NA	NA	0	0	0	0	0	0
hsa-mir-7109-5p	NA	NA	NA	NA	NA	NA	0	0	0	0	0	0
hsa-mir-1290	NA	NA	NA	NA	NA	NA	1	1	0	0	0	0
hsa-mir-1252-5p	13.2868	0.70428	0.555191	11.1848	1.19869	0.530463	0	0	0	0	0	0
hsa-mir-4533	NA	NA	NA	NA	NA	NA	0	0	0	0	0	0
hsa-mir-6828-5p	NA	NA	NA	NA	NA	NA	0	0	0	0	0	0
hsa-mir-6516-5p	NA	NA	NA	NA	NA	NA	0	0	0	0	0	0
hsa-mir-4501	NA	NA	NA	NA	NA	NA	0	0	0	0	0	0
hsa-mir-520f-3p	NA	NA	NA	NA	NA	NA	0	0	0	0	0	0
hsa-mir-4701-3p	NA	NA	NA	NA	NA	NA	0	0	0	0	0	0
hsa-mir-5589-5p	NA	NA	NA	NA	NA	NA	0	0	0	0	0	0
hsa-mir-6736-5p	NA	NA	NA	NA	NA	NA	0	0	0	0	0	0
hsa-mir-4458	NA	NA	NA	NA	NA	NA	1	1	0	0	0	0
hsa-mir-4500	NA	NA	NA	NA	NA	NA	0	0	0	0	0	0
hsa-mir-4768-5p	NA	NA	NA	NA	NA	NA	0	0	0	0	0	0
hsa-mir-6809-3p	NA	NA	NA	NA	NA	NA	0	0	0	0	0	0
hsa-mir-6833-3p	NA	NA	NA	NA	NA	NA	0	0	0	0	0	0
hsa-mir-4461	61.26	0.301374	0.65705	73.077	-0.240816	0.941534	0	0	0	0	0	0
hsa-mir-4639-5p	NA	NA	NA	NA	NA	NA	0	0	0	0	0	0
hsa-mir-548l	7.0527	-0.677999	0.715415	NA	NA	NA	0	0	0	0	0	0
hsa-mir-7515	NA	NA	NA	NA	NA	NA	1	1	0	0	0	0
hsa-mir-552-3p	NA	NA	NA	NA	NA	NA	3	3	0	0	0	1
hsa-mir-6505-5p	NA	NA	NA	NA	NA	NA	0	0	0	0	0	0
hsa-mir-4462	NA	NA	NA	NA	NA	NA	0	0	0	0	0	0
hsa-mir-433-5p	NA	NA	NA	NA	NA	NA	3	3	0	0	0	1
hsa-mir-203b-3p	3.23475	0.40201	0.913392	NA	NA	NA	0	0	0	0	0	0
hsa-mir-297	NA	NA	NA	NA	NA	NA	2	2	0	0	0	1
hsa-mir-3924	NA	NA	NA	NA	NA	NA	0	0	0	0	0	0
hsa-mir-208a-5p	NA	NA	NA	NA	NA	NA	0	0	0	0	0	0
hsa-mir-504-3p	NA	NA	NA	NA	NA	NA	1	1	0	0	0	0
hsa-mir-208b-5p	NA	NA	NA	NA	NA	NA	0	0	0	0	0	0
hsa-mir-4433b-3p	NA	NA	NA	NA	NA	NA	0	0	0	0	0	0
hsa-mir-8063	NA	NA	NA	NA	NA	NA	0	0	0	0	0	0
hsa-mir-5000-5p	NA	NA	NA	NA	NA	NA	0	0	0	0	0	0
hsa-mir-6769a-3p	NA	NA	NA	NA	NA	NA	0	0	0	0	0	0
hsa-mir-3200-5p	NA	NA	NA	NA	NA	NA	0	0	0	0	0	0
hsa-mir-144-5p	NA	NA	NA	NA	NA	NA	8	8	0	2	0	0
hsa-mir-19b-2-5p	NA	NA	NA	NA	NA	NA	0	0	0	0	0	0
hsa-mir-508-3p	NA	NA	NA	NA	NA	NA	2	2	0	0	0	0
hsa-mir-2052	NA	NA	NA	NA	NA	NA	0	0	0	0	0	0
hsa-mir-3121-3p	4.02298	-0.297679	0.936102	NA	NA	NA	0	0	0	0	0	0
hsa-mir-4427	NA	NA	NA	NA	NA	NA	0	0	0	0	0	0
hsa-mir-4445-5p	NA	NA	NA	NA	NA	NA	0	0	0	0	0	0
hsa-mir-4724-5p	NA	NA	NA	NA	NA	NA	0	0	0	0	0	0
hsa-mir-6766-3p	NA	NA	NA	NA	NA	NA	0	0	0	0	0	0
hsa-mir-466	8.85587	0.815338	0.571006	NA	NA	NA	2	2	0	0	0	0
hsa-mir-3941	5.33395	1.04606	0.557228	NA	NA	NA	1	1	0	0	0	0
hsa-mir-130a-5p	42.734	1.0782	0.0522719	NA	NA	NA	1	1	0	0	0	0
hsa-mir-323a-3p	NA	NA	NA	NA	NA	NA	2	2	0	0	0	0
hsa-mir-23c	NA	NA	NA	NA	NA	NA	2	2	0	1	1	0
hsa-mir-124-5p	NA	NA	NA	NA	NA	NA	5	5	0	0	2	0
hsa-mir-579-3p	NA	NA	NA	NA	NA	NA	1	1	0	0	0	0
hsa-mir-1206	NA	NA	NA	NA	NA	NA	0	0	0	0	0	0
hsa-mir-3927-3p	NA	NA	NA	NA	NA	NA	0	0	0	0	0	0
hsa-mir-664b-3p	5.5109	1.03175	0.555191	NA	NA	NA	0	0	0	0	0	0
hsa-mir-6831-5p	NA	NA	NA	NA	NA	NA	0	0	0	0	0	0
hsa-mir-6853-3p	NA	NA	NA	NA	NA	NA	0	0	0	0	0	0
hsa-mir-374c-5p	56.4092	0.24344	0.736535	30.8176	0.979781	0.307069	0	0	0	0	0	0
hsa-mir-3142	NA	NA	NA	NA	NA	NA	0	0	0	0	0	0
hsa-mir-4650-5p	NA	NA	NA	NA	NA	NA	0	0	0	0	0	0
hsa-mir-1245b-5p	NA	NA	NA	NA	NA	NA	0	0	0	0	0	0
hsa-mir-551b-5p	5.69745	0.01104	0.993915	NA	NA	NA	0	0	0	0	0	0
hsa-mir-153-5p	NA	NA	NA	NA	NA	NA	5	4	0	0	1	1
hsa-mir-4325	NA	NA	NA	NA	NA	NA	0	0	0	0	0	0
hsa-mir-4275	NA	NA	NA	NA	NA	NA	0	0	0	0	0	0
hsa-mir-3134	10.8355	-0.828531	0.557292	NA	NA	NA	0	0	0	0	0	0
hsa-mir-6744-5p	NA	NA	NA	NA	NA	NA	0	0	0	0	0	0
hsa-mir-665	NA	NA	NA	NA	NA	NA	2	1	0	0	0	0
hsa-mir-3616-3p	NA	NA	NA	NA	NA	NA	0	0	0	0	0	0
hsa-mir-4521	1484.74	0.260742	0.572457	183.539	-0.288764	0.898757	0	0	0	0	0	0
hsa-mir-889-3p	NA	NA	NA	NA	NA	NA	0	0	0	0	0	0
hsa-mir-4509	NA	NA	NA	NA	NA	NA	0	0	0	0	0	0
hsa-mir-4733-5p	NA	NA	NA	NA	NA	NA	0	0	0	0	0	0
hsa-mir-4744	NA	NA	NA	NA	NA	NA	0	0	0	0	0	0
hsa-mir-4660	NA	NA	NA	NA	NA	NA	0	0	0	0	0	0
hsa-mir-4720-3p	NA	NA	NA	NA	NA	NA	0	0	0	0	0	0
hsa-mir-5047	NA	NA	NA	NA	NA	NA	0	0	0	0	0	0
hsa-mir-6083	NA	NA	NA	NA	NA	NA	0	0	0	0	0	0
hsa-mir-3622b-5p	NA	NA	NA	NA	NA	NA	3	3	0	0	1	0
hsa-mir-4720-5p	NA	NA	NA	NA	NA	NA	0	0	0	0	0	0
hsa-mir-4799-3p	NA	NA	NA	NA	NA	NA	0	0	0	0	0	0
hsa-mir-5588-5p	11.7091	0.476959	0.757275	11.0025	-0.640828	0.814849	0	0	0	0	0	0
hsa-mir-8068	NA	NA	NA	NA	NA	NA	0	0	0	0	0	0
hsa-mir-4263	NA	NA	NA	NA	NA	NA	0	0	0	0	0	0
hsa-mir-3684	NA	NA	NA	NA	NA	NA	0	0	0	0	0	0
hsa-mir-4696	NA	NA	NA	NA	NA	NA	0	0	0	0	0	0
hsa-mir-4524b-3p	NA	NA	NA	NA	NA	NA	0	0	0	0	0	0
hsa-mir-3922-5p	NA	NA	NA	NA	NA	NA	0	0	0	0	0	0
hsa-mir-4753-5p	NA	NA	NA	NA	NA	NA	0	0	0	0	0	0
hsa-mir-5695	NA	NA	NA	NA	NA	NA	0	0	0	0	0	0
hsa-mir-3161	NA	NA	NA	NA	NA	NA	0	0	0	0	0	0
hsa-mir-6782-5p	NA	NA	NA	NA	NA	NA	0	0	0	0	0	0
hsa-mir-4293	NA	NA	NA	NA	NA	NA	0	0	0	0	0	0
hsa-mir-4280	NA	NA	NA	NA	NA	NA	0	0	0	0	0	0
hsa-mir-6832-5p	NA	NA	NA	NA	NA	NA	0	0	0	0	0	0
hsa-mir-1323	NA	NA	NA	NA	NA	NA	0	0	0	0	0	0
hsa-mir-4476	NA	NA	NA	NA	NA	NA	0	0	0	0	0	0
hsa-mir-4742-5p	NA	NA	NA	NA	NA	NA	0	0	0	0	0	0
hsa-mir-4772-5p	NA	NA	NA	NA	NA	NA	0	0	0	0	0	0
hsa-mir-6876-5p	NA	NA	NA	NA	NA	NA	0	0	0	0	0	0
hsa-mir-4266	NA	NA	NA	NA	NA	NA	0	0	0	0	0	0
hsa-mir-4695-5p	NA	NA	NA	NA	NA	NA	0	0	0	0	0	0
hsa-mir-4779	NA	NA	NA	NA	NA	NA	0	0	0	0	0	0
hsa-mir-6888-3p	NA	NA	NA	NA	NA	NA	0	0	0	0	0	0
hsa-mir-4709-3p	NA	NA	NA	NA	NA	NA	0	0	0	0	0	0
hsa-mir-5689	2.96657	0.0590802	0.992264	NA	NA	NA	0	0	0	0	0	0
hsa-mir-432-5p	NA	NA	NA	NA	NA	NA	4	4	0	1	0	1
hsa-mir-3975	NA	NA	NA	NA	NA	NA	0	0	0	0	0	0
hsa-mir-4773	NA	NA	NA	NA	NA	NA	0	0	0	0	0	0
hsa-mir-2467-5p	NA	NA	NA	NA	NA	NA	0	0	0	0	0	0
hsa-mir-6815-3p	NA	NA	NA	NA	NA	NA	0	0	0	0	0	0
hsa-mir-6884-5p	NA	NA	NA	NA	NA	NA	0	0	0	0	0	0
hsa-mir-325	NA	NA	NA	NA	NA	NA	0	0	0	0	0	0
hsa-mir-411-5p	NA	NA	NA	NA	NA	NA	2	2	0	0	1	0
hsa-mir-1301-5p	NA	NA	NA	NA	NA	NA	0	0	0	0	0	0
hsa-mir-3155a	NA	NA	NA	NA	NA	NA	0	0	0	0	0	0
hsa-mir-3155b	NA	NA	NA	NA	NA	NA	0	0	0	0	0	0
hsa-mir-4645-5p	NA	NA	NA	NA	NA	NA	0	0	0	0	0	0
hsa-mir-4673	NA	NA	NA	NA	NA	NA	0	0	0	0	0	0
hsa-mir-6502-5p	NA	NA	NA	NA	NA	NA	0	0	0	0	0	0
hsa-mir-6856-3p	NA	NA	NA	NA	NA	NA	0	0	0	0	0	0
hsa-mir-6509-5p	4.04068	-0.185244	0.960101	NA	NA	NA	0	0	0	0	0	0
hsa-mir-567	37.4611	-0.106992	0.954724	12.9705	0.248897	0.973026	1	1	0	0	0	0
hsa-mir-4795-3p	NA	NA	NA	NA	NA	NA	0	0	0	0	0	0
hsa-mir-4264	NA	NA	NA	NA	NA	NA	0	0	0	0	0	0
hsa-mir-3606-5p	NA	NA	NA	NA	NA	NA	0	0	0	0	0	0
hsa-mir-3912-5p	NA	NA	NA	NA	NA	NA	0	0	0	0	0	0
hsa-mir-509-5p	NA	NA	NA	NA	NA	NA	1	1	0	0	0	0
hsa-mir-509-3-5p	NA	NA	NA	NA	NA	NA	3	3	0	0	0	0
hsa-mir-4418	NA	NA	NA	NA	NA	NA	0	0	0	0	0	0
hsa-mir-548av-3p	20.7147	-0.610345	0.514203	11.6682	0.8662	0.729607	0	0	0	0	0	0
hsa-mir-6722-3p	NA	NA	NA	NA	NA	NA	0	0	0	0	0	0
hsa-mir-8076	NA	NA	NA	NA	NA	NA	0	0	0	0	0	0
hsa-mir-3169	NA	NA	NA	NA	NA	NA	0	0	0	0	0	0
hsa-mir-4252	NA	NA	NA	NA	NA	NA	0	0	0	0	0	0
hsa-mir-4759	NA	NA	NA	NA	NA	NA	0	0	0	0	0	0
hsa-mir-8083	NA	NA	NA	NA	NA	NA	0	0	0	0	0	0
hsa-mir-592	5.0249	0.641515	0.773549	NA	NA	NA	3	3	0	0	0	0
hsa-mir-3174	11.47	-0.226069	0.907873	11.1435	-1.20571	0.487638	0	0	0	0	0	0
hsa-mir-3617-3p	NA	NA	NA	NA	NA	NA	0	0	0	0	0	0
hsa-mir-92a-2-5p	NA	NA	NA	NA	NA	NA	0	0	0	0	0	0
hsa-mir-3173-5p	14.7211	-0.220591	0.885855	11.8901	0.534164	0.834121	0	0	0	0	0	0
hsa-mir-4271	NA	NA	NA	NA	NA	NA	1	1	0	0	0	0
hsa-mir-4651	NA	NA	NA	NA	NA	NA	0	0	0	0	0	0
hsa-mir-4725-3p	NA	NA	NA	NA	NA	NA	0	0	0	0	0	0
hsa-mir-6737-5p	NA	NA	NA	NA	NA	NA	0	0	0	0	0	0
hsa-mir-6756-5p	NA	NA	NA	NA	NA	NA	0	0	0	0	0	0
hsa-mir-6766-5p	NA	NA	NA	NA	NA	NA	0	0	0	0	0	0
hsa-mir-6799-3p	NA	NA	NA	NA	NA	NA	0	0	0	0	0	0
hsa-mir-6812-5p	NA	NA	NA	NA	NA	NA	0	0	0	0	0	0
hsa-mir-6819-5p	NA	NA	NA	NA	NA	NA	0	0	0	0	0	0
hsa-mir-6780b-5p	NA	NA	NA	NA	NA	NA	0	0	0	0	0	0
hsa-mir-6890-5p	NA	NA	NA	NA	NA	NA	0	0	0	0	0	0
hsa-mir-7108-5p	NA	NA	NA	NA	NA	NA	0	0	0	0	0	0
hsa-mir-7976	43.6846	0.0612085	0.960101	29.923	0.10154	0.973026	0	0	0	0	0	0
hsa-mir-6081	NA	NA	NA	NA	NA	NA	0	0	0	0	0	0
hsa-mir-1185-2-3p	NA	NA	NA	NA	NA	NA	0	0	0	0	0	0
hsa-mir-1185-1-3p	NA	NA	NA	NA	NA	NA	0	0	0	0	0	0
hsa-mir-1296-3p	NA	NA	NA	NA	NA	NA	0	0	0	0	0	0
hsa-mir-4727-3p	NA	NA	NA	NA	NA	NA	0	0	0	0	0	0
hsa-mir-6857-5p	NA	NA	NA	NA	NA	NA	0	0	0	0	0	0
hsa-mir-648	NA	NA	NA	NA	NA	NA	2	2	0	0	0	1
hsa-mir-3160-3p	NA	NA	NA	NA	NA	NA	0	0	0	0	0	0
hsa-mir-6504-3p	NA	NA	NA	NA	NA	NA	0	0	0	0	0	0
hsa-mir-6767-3p	NA	NA	NA	NA	NA	NA	0	0	0	0	0	0
hsa-mir-891a-3p	NA	NA	NA	NA	NA	NA	0	0	0	0	0	0
hsa-mir-3688-5p	NA	NA	NA	NA	NA	NA	0	0	0	0	0	0
hsa-mir-3177-5p	NA	NA	NA	NA	NA	NA	0	0	0	0	0	0
hsa-mir-561-5p	55.9357	1.54015	9.23e-06	20.6543	1.64837	0.278404	0	0	0	0	0	0
hsa-mir-609	NA	NA	NA	NA	NA	NA	0	0	0	0	0	0
hsa-mir-3173-3p	NA	NA	NA	NA	NA	NA	0	0	0	0	0	0
hsa-mir-3150b-3p	NA	NA	NA	NA	NA	NA	0	0	0	0	0	0
hsa-mir-4784	NA	NA	NA	NA	NA	NA	0	0	0	0	0	0
hsa-mir-6891-5p	NA	NA	NA	NA	NA	NA	0	0	0	0	0	0
hsa-mir-3972	NA	NA	NA	NA	NA	NA	0	0	0	0	0	0
hsa-mir-6765-5p	NA	NA	NA	NA	NA	NA	0	0	0	0	0	0
hsa-mir-1197	NA	NA	NA	NA	NA	NA	0	0	0	0	0	0
hsa-mir-4632-5p	NA	NA	NA	NA	NA	NA	0	0	0	0	0	0
hsa-mir-4436b-3p	NA	NA	NA	NA	NA	NA	0	0	0	0	0	0
hsa-mir-6735-5p	NA	NA	NA	NA	NA	NA	0	0	0	0	0	0
hsa-mir-6879-5p	NA	NA	NA	NA	NA	NA	0	0	0	0	0	0
hsa-mir-7843-5p	NA	NA	NA	NA	NA	NA	0	0	0	0	0	0
hsa-mir-1249-5p	NA	NA	NA	NA	NA	NA	0	0	0	0	0	0
hsa-mir-6797-5p	NA	NA	NA	NA	NA	NA	0	0	0	0	0	0
hsa-mir-7847-3p	NA	NA	NA	NA	NA	NA	0	0	0	0	0	0
hsa-mir-8084	NA	NA	NA	NA	NA	NA	0	0	0	0	0	0
hsa-mir-4763-3p	NA	NA	NA	NA	NA	NA	0	0	0	0	0	0
hsa-mir-6132	NA	NA	NA	NA	NA	NA	0	0	0	0	0	0
hsa-mir-6836-5p	NA	NA	NA	NA	NA	NA	0	0	0	0	0	0
hsa-mir-7150	NA	NA	NA	NA	NA	NA	0	0	0	0	0	0
hsa-mir-1257	259.497	0.153484	0.778813	NA	NA	NA	0	0	0	0	0	0
hsa-mir-6809-5p	NA	NA	NA	NA	NA	NA	0	0	0	0	0	0
hsa-mir-767-5p	NA	NA	NA	NA	NA	NA	11	7	0	0	0	1
hsa-mir-6512-5p	NA	NA	NA	NA	NA	NA	0	0	0	0	0	0
hsa-mir-6884-3p	NA	NA	NA	NA	NA	NA	0	0	0	0	0	0
hsa-mir-568	NA	NA	NA	NA	NA	NA	0	0	0	0	0	0
hsa-mir-766-5p	NA	NA	NA	NA	NA	NA	0	0	0	0	0	0
hsa-mir-3185	NA	NA	NA	NA	NA	NA	0	0	0	0	0	0
hsa-mir-6825-5p	NA	NA	NA	NA	NA	NA	0	0	0	0	0	0
hsa-mir-7106-5p	NA	NA	NA	NA	NA	NA	0	0	0	0	0	0
hsa-mir-937-5p	NA	NA	NA	NA	NA	NA	0	0	0	0	0	0
hsa-mir-5702	NA	NA	NA	NA	NA	NA	0	0	0	0	0	0
hsa-mir-511-3p	NA	NA	NA	NA	NA	NA	0	0	0	0	0	0
hsa-mir-4766-5p	NA	NA	NA	NA	NA	NA	0	0	0	0	0	0
hsa-mir-3529-5p	NA	NA	NA	NA	NA	NA	0	0	0	0	0	0
hsa-mir-5571-5p	NA	NA	NA	NA	NA	NA	0	0	0	0	0	0
hsa-mir-892a	NA	NA	NA	NA	NA	NA	1	1	0	0	0	0
hsa-mir-3152-3p	NA	NA	NA	NA	NA	NA	0	0	0	0	0	0
hsa-mir-4318	NA	NA	NA	NA	NA	NA	0	0	0	0	0	0
hsa-mir-3614-5p	NA	NA	NA	NA	NA	NA	0	0	0	0	0	0
hsa-mir-4693-5p	NA	NA	NA	NA	NA	NA	0	0	0	0	0	0
hsa-mir-6513-5p	NA	NA	NA	NA	NA	NA	0	0	0	0	0	0
hsa-mir-4635	NA	NA	NA	NA	NA	NA	0	0	0	0	0	0
hsa-mir-4670-3p	NA	NA	NA	NA	NA	NA	0	0	0	0	0	0
hsa-mir-219a-1-3p	18.7673	0.668736	0.52724	28.8209	-0.440313	0.810307	1	0	0	0	0	0
hsa-mir-3154	NA	NA	NA	NA	NA	NA	0	0	0	0	0	0
hsa-mir-4735-3p	NA	NA	NA	NA	NA	NA	0	0	0	0	0	0
hsa-mir-1298-5p	NA	NA	NA	NA	NA	NA	1	1	0	0	0	0
hsa-mir-6732-3p	NA	NA	NA	NA	NA	NA	0	0	0	0	0	0
hsa-mir-1279	NA	NA	NA	NA	NA	NA	0	0	0	0	0	0
hsa-mir-6790-3p	NA	NA	NA	NA	NA	NA	0	0	0	0	0	0
hsa-mir-6821-3p	NA	NA	NA	NA	NA	NA	0	0	0	0	0	0
hsa-mir-3127-3p	5.64469	-0.782572	0.681222	NA	NA	NA	0	0	0	0	0	0
hsa-mir-4320	NA	NA	NA	NA	NA	NA	0	0	0	0	0	0
hsa-mir-3692-3p	NA	NA	NA	NA	NA	NA	0	0	0	0	0	0
hsa-mir-5089-5p	NA	NA	NA	NA	NA	NA	0	0	0	0	0	0
hsa-mir-6756-3p	NA	NA	NA	NA	NA	NA	0	0	0	0	0	0
hsa-mir-3908	7.31802	0.00637321	0.995945	13.4919	-0.238941	0.973026	0	0	0	0	0	0
hsa-mir-4504	11.918	-0.585223	0.674403	NA	NA	NA	0	0	0	0	0	0
hsa-mir-6076	NA	NA	NA	NA	NA	NA	0	0	0	0	0	0
hsa-mir-6797-3p	NA	NA	NA	NA	NA	NA	0	0	0	0	0	0
hsa-mir-377-5p	NA	NA	NA	NA	NA	NA	0	0	0	0	0	0
hsa-mir-6086	NA	NA	NA	NA	NA	NA	0	0	0	0	0	0
hsa-mir-219b-3p	NA	NA	NA	NA	NA	NA	0	0	0	0	0	0
hsa-mir-4680-3p	NA	NA	NA	NA	NA	NA	0	0	0	0	0	0
hsa-mir-5187-3p	NA	NA	NA	NA	NA	NA	0	0	0	0	0	0
hsa-mir-580-5p	NA	NA	NA	NA	NA	NA	0	0	0	0	0	0
hsa-mir-3120-3p	NA	NA	NA	NA	NA	NA	0	0	0	0	0	0
hsa-mir-1184	NA	NA	NA	NA	NA	NA	0	0	0	0	0	0
hsa-mir-4517	NA	NA	NA	NA	NA	NA	0	0	0	0	0	0
hsa-mir-7703	NA	NA	NA	NA	NA	NA	0	0	0	0	0	0
hsa-mir-3668	11.0645	-0.0779689	0.965657	NA	NA	NA	0	0	0	0	0	0
hsa-mir-5094	7.25402	-0.235372	0.931281	NA	NA	NA	0	0	0	0	0	0
hsa-mir-6806-5p	NA	NA	NA	NA	NA	NA	0	0	0	0	0	0
hsa-mir-376c-5p	NA	NA	NA	NA	NA	NA	0	0	0	0	0	0
hsa-mir-376b-5p	NA	NA	NA	NA	NA	NA	0	0	0	0	0	0
hsa-mir-875-5p	NA	NA	NA	NA	NA	NA	1	1	0	0	0	0
hsa-mir-4777-3p	NA	NA	NA	NA	NA	NA	0	0	0	0	0	0
hsa-mir-8080	NA	NA	NA	NA	NA	NA	0	0	0	0	0	0
hsa-mir-4690-5p	NA	NA	NA	NA	NA	NA	0	0	0	0	0	0
hsa-mir-4725-5p	NA	NA	NA	NA	NA	NA	0	0	0	0	0	0
hsa-mir-4760-3p	NA	NA	NA	NA	NA	NA	0	0	0	0	0	0
hsa-mir-216b-3p	30.6557	-0.981825	0.141834	15.1524	-1.38335	0.308369	1	1	0	0	0	0
hsa-mir-4781-3p	2.88802	0.24301	0.960101	NA	NA	NA	0	0	0	0	0	0
hsa-mir-4477b	3.76603	0.285695	0.947432	NA	NA	NA	0	0	0	0	0	0
hsa-mir-7856-5p	NA	NA	NA	NA	NA	NA	0	0	0	0	0	0
hsa-mir-6818-5p	NA	NA	NA	NA	NA	NA	0	0	0	0	0	0
hsa-mir-4520-5p	NA	NA	NA	NA	NA	NA	0	0	0	0	0	0
hsa-mir-515-5p	NA	NA	NA	NA	NA	NA	3	3	0	0	0	0
hsa-mir-519e-5p	NA	NA	NA	NA	NA	NA	0	0	0	0	0	0
hsa-mir-4273	NA	NA	NA	NA	NA	NA	1	1	0	0	0	0
hsa-mir-7156-5p	NA	NA	NA	NA	NA	NA	0	0	0	0	0	0
hsa-mir-4728-3p	NA	NA	NA	NA	NA	NA	0	0	0	0	0	0
hsa-mir-4328	NA	NA	NA	NA	NA	NA	0	0	0	0	0	0
hsa-mir-5002-3p	NA	NA	NA	NA	NA	NA	0	0	0	0	0	0
hsa-mir-4329	NA	NA	NA	NA	NA	NA	0	0	0	0	0	0
hsa-mir-4452	NA	NA	NA	NA	NA	NA	0	0	0	0	0	0
hsa-mir-4524a-3p	NA	NA	NA	NA	NA	NA	0	0	0	0	0	0
hsa-mir-892c-5p	NA	NA	NA	NA	NA	NA	0	0	0	0	0	0
hsa-mir-4703-3p	NA	NA	NA	NA	NA	NA	0	0	0	0	0	0
hsa-mir-561-3p	NA	NA	NA	NA	NA	NA	2	1	0	0	0	0
hsa-mir-4697-3p	NA	NA	NA	NA	NA	NA	0	0	0	0	0	0
hsa-mir-6079	NA	NA	NA	NA	NA	NA	0	0	0	0	0	0
hsa-mir-5096	313.374	0.023032	0.97521	164.175	0.248933	0.833048	0	0	0	0	0	0
hsa-mir-6892-5p	NA	NA	NA	NA	NA	NA	0	0	0	0	0	0
hsa-mir-1273c	174.646	0.371493	0.356588	126.208	-0.368038	0.681898	0	0	0	0	0	0
hsa-mir-3611	3.451	-1.05046	0.656486	NA	NA	NA	0	0	0	0	0	0
hsa-mir-520g-5p	NA	NA	NA	NA	NA	NA	0	0	0	0	0	0
hsa-mir-1827	NA	NA	NA	NA	NA	NA	0	0	0	0	0	0
hsa-mir-5580-3p	NA	NA	NA	NA	NA	NA	0	0	0	0	0	0
hsa-mir-6866-5p	7.20539	-0.635517	0.728871	14.4476	-0.629567	0.810307	0	0	0	0	0	0
hsa-mir-7151-5p	NA	NA	NA	NA	NA	NA	0	0	0	0	0	0
hsa-mir-1294	13.6744	-0.40966	0.778813	12.6944	-0.561808	0.816806	0	0	0	0	0	0
hsa-mir-5586-3p	NA	NA	NA	NA	NA	NA	0	0	0	0	0	0
hsa-mir-365b-3p	326.858	-0.633626	0.0759035	184.836	-0.0369781	0.973026	0	0	0	0	0	0
hsa-mir-938	NA	NA	NA	NA	NA	NA	0	0	0	0	0	0
hsa-mir-6886-3p	NA	NA	NA	NA	NA	NA	0	0	0	0	0	0
hsa-mir-450a-2-3p	NA	NA	NA	NA	NA	NA	0	0	0	0	0	0
hsa-mir-3678-3p	NA	NA	NA	NA	NA	NA	0	0	0	0	0	0
hsa-mir-3919	NA	NA	NA	NA	NA	NA	0	0	0	0	0	0
hsa-mir-3689a-3p	NA	NA	NA	NA	NA	NA	0	0	0	0	0	0
hsa-mir-3689b-3p	NA	NA	NA	NA	NA	NA	0	0	0	0	0	0
hsa-mir-3689c	NA	NA	NA	NA	NA	NA	0	0	0	0	0	0
hsa-mir-6779-5p	NA	NA	NA	NA	NA	NA	0	0	0	0	0	0
hsa-mir-6780a-5p	NA	NA	NA	NA	NA	NA	0	0	0	0	0	0
hsa-mir-6782-3p	NA	NA	NA	NA	NA	NA	0	0	0	0	0	0
hsa-mir-1273h-5p	6.18938	-0.217062	0.952057	NA	NA	NA	0	0	0	0	0	0
hsa-mir-3122	NA	NA	NA	NA	NA	NA	0	0	0	0	0	0
hsa-mir-3913-5p	19.7708	0.154169	0.925082	21.3932	-0.725075	0.677963	0	0	0	0	0	0
hsa-mir-3170	9.54953	0.61731	0.681222	10.4273	0.102791	0.973026	0	0	0	0	0	0
hsa-mir-4259	NA	NA	NA	NA	NA	NA	0	0	0	0	0	0
hsa-mir-4260	NA	NA	NA	NA	NA	NA	0	0	0	0	0	0
hsa-mir-5572	NA	NA	NA	NA	NA	NA	0	0	0	0	0	0
hsa-mir-6855-5p	NA	NA	NA	NA	NA	NA	0	0	0	0	0	0
hsa-mir-7852-3p	NA	NA	NA	NA	NA	NA	0	0	0	0	0	0
hsa-mir-4482-3p	NA	NA	NA	NA	NA	NA	0	0	0	0	0	0
hsa-mir-4492	NA	NA	NA	NA	NA	NA	0	0	0	0	0	0
hsa-mir-4498	NA	NA	NA	NA	NA	NA	0	0	0	0	0	0
hsa-mir-5001-5p	NA	NA	NA	NA	NA	NA	0	0	0	0	0	0
hsa-mir-4433b-5p	NA	NA	NA	NA	NA	NA	0	0	0	0	0	0
hsa-mir-517a-3p	NA	NA	NA	NA	NA	NA	2	2	0	0	0	0
hsa-mir-517b-3p	NA	NA	NA	NA	NA	NA	0	0	0	0	0	0
hsa-mir-517c-3p	NA	NA	NA	NA	NA	NA	1	1	0	0	0	0
hsa-mir-4424	2.49927	-1.13254	0.709763	NA	NA	NA	0	0	0	0	0	0
hsa-mir-3914	NA	NA	NA	NA	NA	NA	0	0	0	0	0	0
hsa-mir-7113-3p	NA	NA	NA	NA	NA	NA	0	0	0	0	0	0
hsa-mir-578	5.62152	-4.61477	0.0092351	13.0258	-1.0646	0.649914	0	0	0	0	0	0
hsa-mir-8064	NA	NA	NA	NA	NA	NA	0	0	0	0	0	0
hsa-mir-548e-3p	181.433	-0.0935314	0.921605	67.3639	-0.00611883	0.998042	0	0	0	0	0	0
hsa-mir-548f-3p	251.908	0.334728	0.402661	36.0153	1.50359	0.0936962	0	0	0	0	0	0
hsa-mir-548ar-3p	40.186	-0.0988976	0.948253	20.8345	0.0642086	0.973026	0	0	0	0	0	0
hsa-mir-548az-3p	2.87766	-0.694493	0.835001	NA	NA	NA	0	0	0	0	0	0
hsa-mir-5692a	NA	NA	NA	NA	NA	NA	0	0	0	0	0	0
hsa-mir-3681-5p	NA	NA	NA	NA	NA	NA	0	0	0	0	0	0
hsa-mir-6849-5p	NA	NA	NA	NA	NA	NA	0	0	0	0	0	0
hsa-mir-1231	NA	NA	NA	NA	NA	NA	0	0	0	0	0	0
hsa-mir-548s	6.61306	0.242681	0.92615	NA	NA	NA	0	0	0	0	0	0
hsa-mir-3922-3p	9.59647	0.309344	0.867015	NA	NA	NA	0	0	0	0	0	0
hsa-mir-6783-5p	NA	NA	NA	NA	NA	NA	0	0	0	0	0	0
hsa-mir-6824-5p	NA	NA	NA	NA	NA	NA	0	0	0	0	0	0
hsa-mir-1267	NA	NA	NA	NA	NA	NA	0	0	0	0	0	0
hsa-mir-3153	NA	NA	NA	NA	NA	NA	0	0	0	0	0	0
hsa-mir-6733-5p	6.18291	-0.854261	0.620238	NA	NA	NA	0	0	0	0	0	0
hsa-mir-6734-5p	NA	NA	NA	NA	NA	NA	0	0	0	0	0	0
hsa-mir-6739-5p	NA	NA	NA	NA	NA	NA	0	0	0	0	0	0
hsa-mir-7160-5p	NA	NA	NA	NA	NA	NA	0	0	0	0	0	0
hsa-mir-3650	NA	NA	NA	NA	NA	NA	0	0	0	0	0	0
hsa-mir-4455	NA	NA	NA	NA	NA	NA	0	0	0	0	0	0
hsa-mir-4487	NA	NA	NA	NA	NA	NA	0	0	0	0	0	0
hsa-mir-6864-5p	NA	NA	NA	NA	NA	NA	0	0	0	0	0	0
hsa-mir-654-5p	NA	NA	NA	NA	NA	NA	1	0	0	0	0	0
hsa-mir-541-3p	NA	NA	NA	NA	NA	NA	2	2	0	0	0	0
hsa-mir-6769a-5p	NA	NA	NA	NA	NA	NA	0	0	0	0	0	0
hsa-mir-6769b-5p	NA	NA	NA	NA	NA	NA	0	0	0	0	0	0
hsa-mir-302a-5p	NA	NA	NA	NA	NA	NA	2	0	0	0	0	0
hsa-mir-432-3p	NA	NA	NA	NA	NA	NA	0	0	0	0	0	0
hsa-mir-4764-5p	NA	NA	NA	NA	NA	NA	0	0	0	0	0	0
hsa-mir-1208	NA	NA	NA	NA	NA	NA	0	0	0	0	0	0
hsa-mir-4676-3p	14.7169	1.72997	0.0189986	NA	NA	NA	0	0	0	0	0	0
hsa-mir-892c-3p	NA	NA	NA	NA	NA	NA	0	0	0	0	0	0
hsa-mir-6510-5p	NA	NA	NA	NA	NA	NA	0	0	0	0	0	0
hsa-mir-6513-3p	NA	NA	NA	NA	NA	NA	0	0	0	0	0	0
hsa-mir-4732-5p	NA	NA	NA	NA	NA	NA	0	0	0	0	0	0
hsa-mir-4760-5p	NA	NA	NA	NA	NA	NA	0	0	0	0	0	0
hsa-mir-5002-5p	NA	NA	NA	NA	NA	NA	0	0	0	0	0	0
hsa-mir-8061	NA	NA	NA	NA	NA	NA	0	0	0	0	0	0
hsa-mir-1273g-5p	NA	NA	NA	NA	NA	NA	0	0	0	0	0	0
hsa-mir-6845-3p	NA	NA	NA	NA	NA	NA	0	0	0	0	0	0
hsa-mir-6771-3p	NA	NA	NA	NA	NA	NA	0	0	0	0	0	0
hsa-mir-3124-3p	NA	NA	NA	NA	NA	NA	0	0	0	0	0	0
hsa-mir-138-2-3p	NA	NA	NA	NA	NA	NA	0	0	0	0	0	0
hsa-mir-6750-5p	NA	NA	NA	NA	NA	NA	0	0	0	0	0	0
hsa-mir-6822-5p	NA	NA	NA	NA	NA	NA	0	0	0	0	0	0
hsa-mir-6893-3p	NA	NA	NA	NA	NA	NA	0	0	0	0	0	0
hsa-mir-3622b-3p	NA	NA	NA	NA	NA	NA	0	0	0	0	0	0
hsa-mir-2278	16.0764	-0.664178	0.544139	NA	NA	NA	0	0	0	0	0	0
hsa-mir-571	NA	NA	NA	NA	NA	NA	0	0	0	0	0	0
hsa-mir-623	NA	NA	NA	NA	NA	NA	1	1	0	0	0	0
hsa-mir-4780	NA	NA	NA	NA	NA	NA	0	0	0	0	0	0
hsa-mir-6866-3p	NA	NA	NA	NA	NA	NA	0	0	0	0	0	0
hsa-mir-670-3p	NA	NA	NA	NA	NA	NA	0	0	0	0	0	0
hsa-mir-516b-3p	NA	NA	NA	NA	NA	NA	0	0	0	0	0	0
hsa-mir-7162-5p	NA	NA	NA	NA	NA	NA	0	0	0	0	0	0
hsa-mir-3158-5p	NA	NA	NA	NA	NA	NA	0	0	0	0	0	0
hsa-mir-4689	NA	NA	NA	NA	NA	NA	2	2	0	0	0	0
hsa-mir-6858-5p	NA	NA	NA	NA	NA	NA	0	0	0	0	0	0
hsa-mir-302c-5p	NA	NA	NA	NA	NA	NA	1	1	0	0	0	0
hsa-mir-3143	NA	NA	NA	NA	NA	NA	0	0	0	0	0	0
hsa-mir-154-3p	NA	NA	NA	NA	NA	NA	1	1	0	0	0	1
hsa-mir-487a-3p	NA	NA	NA	NA	NA	NA	4	4	0	0	2	0
hsa-mir-5195-5p	NA	NA	NA	NA	NA	NA	0	0	0	0	0	0
hsa-mir-6798-3p	NA	NA	NA	NA	NA	NA	0	0	0	0	0	0
hsa-mir-3692-5p	NA	NA	NA	NA	NA	NA	0	0	0	0	0	0
hsa-mir-585-5p	NA	NA	NA	NA	NA	NA	0	0	0	0	0	0
hsa-mir-6131	32.0105	-0.252268	0.804027	NA	NA	NA	0	0	0	0	0	0
hsa-mir-6514-3p	NA	NA	NA	NA	NA	NA	0	0	0	0	0	0
hsa-mir-6747-3p	4.78352	-0.702761	0.758109	NA	NA	NA	0	0	0	0	0	0
hsa-mir-6811-3p	NA	NA	NA	NA	NA	NA	0	0	0	0	0	0
hsa-mir-6814-5p	NA	NA	NA	NA	NA	NA	0	0	0	0	0	0
hsa-mir-26a-1-3p	6.66922	-0.367267	0.880075	NA	NA	NA	16	14	0	0	1	0
hsa-mir-6731-3p	NA	NA	NA	NA	NA	NA	0	0	0	0	0	0
hsa-mir-670-5p	NA	NA	NA	NA	NA	NA	1	1	0	0	0	0
hsa-mir-4446-5p	NA	NA	NA	NA	NA	NA	0	0	0	0	0	0
hsa-mir-4528	NA	NA	NA	NA	NA	NA	0	0	0	0	0	0
hsa-mir-5694	NA	NA	NA	NA	NA	NA	0	0	0	0	0	0
hsa-mir-224-3p	NA	NA	NA	NA	NA	NA	3	3	0	0	0	0
hsa-mir-335-3p	355.079	-0.289889	0.519908	302.377	0.206761	0.816726	3	1	0	0	0	0
hsa-mir-4713-5p	24.6299	0.0507988	0.971809	18.6845	0.104982	0.973026	0	0	0	0	0	0
hsa-mir-6867-3p	NA	NA	NA	NA	NA	NA	0	0	0	0	0	0
hsa-mir-5571-3p	NA	NA	NA	NA	NA	NA	0	0	0	0	0	0
hsa-mir-588	10.6387	-0.353438	0.852534	NA	NA	NA	1	1	0	0	0	0
hsa-mir-875-3p	NA	NA	NA	NA	NA	NA	0	0	0	0	0	0
hsa-mir-4261	NA	NA	NA	NA	NA	NA	0	0	0	0	0	0
hsa-mir-3617-5p	NA	NA	NA	NA	NA	NA	0	0	0	0	0	0
hsa-mir-4701-5p	NA	NA	NA	NA	NA	NA	1	1	0	0	0	0
hsa-mir-1178-5p	NA	NA	NA	NA	NA	NA	0	0	0	0	0	0
hsa-mir-6753-3p	5.95607	0.298732	0.913392	NA	NA	NA	0	0	0	0	0	0
hsa-mir-6885-3p	NA	NA	NA	NA	NA	NA	0	0	0	0	0	0
hsa-mir-7107-3p	NA	NA	NA	NA	NA	NA	0	0	0	0	0	0
hsa-mir-548au-3p	NA	NA	NA	NA	NA	NA	0	0	0	0	0	0
hsa-mir-1264	NA	NA	NA	NA	NA	NA	1	1	0	1	0	0
hsa-mir-3184-3p	NA	NA	NA	NA	NA	NA	0	0	0	0	0	0
hsa-mir-4731-3p	NA	NA	NA	NA	NA	NA	0	0	0	0	0	0
hsa-mir-4801	NA	NA	NA	NA	NA	NA	0	0	0	0	0	0
hsa-mir-4643	NA	NA	NA	NA	NA	NA	0	0	0	0	0	0
hsa-mir-4716-5p	NA	NA	NA	NA	NA	NA	0	0	0	0	0	0
hsa-mir-4778-5p	NA	NA	NA	NA	NA	NA	0	0	0	0	0	0
hsa-mir-3652	NA	NA	NA	NA	NA	NA	0	0	0	0	0	0
hsa-mir-4430	7.16596	-0.421797	0.835197	NA	NA	NA	0	0	0	0	0	0
hsa-mir-3135b	15.3927	0.775458	0.44177	NA	NA	NA	0	0	0	0	0	0
hsa-mir-3166	NA	NA	NA	NA	NA	NA	0	0	0	0	0	0
hsa-mir-1273h-3p	NA	NA	NA	NA	NA	NA	0	0	0	0	0	0
hsa-mir-4772-3p	NA	NA	NA	NA	NA	NA	0	0	0	0	0	0
hsa-mir-1299	21.2741	-0.267036	0.835001	20.3645	-1.19734	0.307069	0	0	0	0	0	0
hsa-mir-374b-3p	6.58613	1.43634	0.29114	NA	NA	NA	0	0	0	0	0	0
hsa-mir-4531	NA	NA	NA	NA	NA	NA	0	0	0	0	0	0
hsa-mir-4737	NA	NA	NA	NA	NA	NA	0	0	0	0	0	0
hsa-mir-922	NA	NA	NA	NA	NA	NA	1	1	0	0	0	0
hsa-mir-597-3p	11.3652	-0.565703	0.701025	10.2011	-0.00315938	0.999084	0	0	0	0	0	0
hsa-mir-2117	NA	NA	NA	NA	NA	NA	0	0	0	0	0	0
hsa-mir-6716-5p	NA	NA	NA	27.7381	0.868449	0.478333	0	0	0	0	0	0
hsa-mir-3128	84.394	0.539828	0.260215	35.5886	-0.850297	0.361514	0	0	0	0	0	0
hsa-mir-8073	NA	NA	NA	NA	NA	NA	0	0	0	0	0	0
hsa-mir-383-3p	NA	NA	NA	NA	NA	NA	1	1	0	0	0	0
hsa-mir-1273e	120.154	0.457243	0.280243	63.7462	-0.377336	0.775828	0	0	0	0	0	0
hsa-mir-3660	30.0411	0.647885	0.620238	10.2231	-0.0609947	0.976562	0	0	0	0	0	0
hsa-mir-4526	NA	NA	NA	NA	NA	NA	0	0	0	0	0	0
hsa-mir-6715b-3p	3.64106	0.539001	0.867015	NA	NA	NA	0	0	0	0	0	0
hsa-mir-5583-3p	NA	NA	NA	NA	NA	NA	0	0	0	0	0	0
hsa-mir-29a-5p	NA	NA	NA	NA	NA	NA	8	7	0	0	0	2
hsa-mir-934	NA	NA	NA	NA	NA	NA	0	0	0	0	0	0
hsa-mir-2116-5p	NA	NA	NA	NA	NA	NA	0	0	0	0	0	0
hsa-mir-4677-5p	4.61804	-0.0275216	0.992264	20.2496	-0.319333	0.900673	0	0	0	0	0	0
hsa-mir-4777-5p	NA	NA	NA	NA	NA	NA	0	0	0	0	0	0
hsa-mir-5591-3p	12.0765	-0.129892	0.960101	NA	NA	NA	0	0	0	0	0	0
hsa-mir-3651	NA	NA	NA	NA	NA	NA	0	0	0	0	0	0
hsa-mir-888-5p	NA	NA	NA	NA	NA	NA	1	1	0	0	1	0
hsa-mir-1244	NA	NA	NA	NA	NA	NA	0	0	0	0	0	0
hsa-mir-4432	NA	NA	NA	NA	NA	NA	0	0	0	0	0	0
hsa-mir-4316	NA	NA	NA	NA	NA	NA	0	0	0	0	0	0
hsa-mir-651-5p	210.888	-0.352281	0.402661	65.0507	-0.443855	0.681898	0	0	0	0	0	0
hsa-mir-655-5p	NA	NA	NA	NA	NA	NA	0	0	0	0	0	0
hsa-mir-548g-3p	NA	NA	NA	NA	NA	NA	0	0	0	0	0	0
hsa-mir-4460	NA	NA	NA	NA	NA	NA	0	0	0	0	0	0
hsa-mir-202-5p	NA	NA	NA	NA	NA	NA	3	3	0	0	1	0
hsa-mir-3591-3p	NA	NA	NA	NA	NA	NA	0	0	0	0	0	0
hsa-mir-4301	4.04755	0.309838	0.926326	NA	NA	NA	0	0	0	0	0	0
hsa-mir-506-5p	NA	NA	NA	NA	NA	NA	3	3	0	0	0	0
hsa-mir-873-3p	NA	NA	NA	NA	NA	NA	0	0	0	0	0	0
hsa-mir-4667-5p	NA	NA	NA	NA	NA	NA	0	0	0	0	0	0
hsa-mir-4700-5p	NA	NA	NA	NA	NA	NA	0	0	0	0	0	0
hsa-mir-4731-5p	NA	NA	NA	NA	NA	NA	0	0	0	0	0	0
hsa-mir-8089	NA	NA	NA	NA	NA	NA	0	0	0	0	0	0
hsa-mir-516a-5p	NA	NA	NA	NA	NA	NA	0	0	0	0	0	0
hsa-mir-3116	NA	NA	NA	NA	NA	NA	0	0	0	0	0	0
hsa-mir-6849-3p	NA	NA	NA	NA	NA	NA	0	0	0	0	0	0
hsa-mir-4682	NA	NA	NA	NA	NA	NA	0	0	0	0	0	0
hsa-mir-924	NA	NA	NA	NA	NA	NA	0	0	0	0	0	0
hsa-mir-5007-5p	NA	NA	NA	NA	NA	NA	0	0	0	0	0	0
hsa-mir-6830-3p	NA	NA	NA	NA	NA	NA	0	0	0	0	0	0
hsa-mir-8056	NA	NA	NA	NA	NA	NA	0	0	0	0	0	0
hsa-mir-4681	NA	NA	NA	NA	NA	NA	0	0	0	0	0	0
hsa-mir-4802-3p	11.9494	-0.265228	0.885855	NA	NA	NA	0	0	0	0	0	0
hsa-mir-3136-5p	NA	NA	NA	NA	NA	NA	0	0	0	0	0	0
hsa-mir-4439	NA	NA	NA	NA	NA	NA	0	0	0	0	0	0
hsa-mir-6857-3p	NA	NA	NA	NA	NA	NA	0	0	0	0	0	0
hsa-mir-7153-5p	NA	NA	NA	NA	NA	NA	0	0	0	0	0	0
hsa-mir-6165	NA	NA	NA	NA	NA	NA	0	0	0	0	0	0
hsa-mir-5186	NA	NA	NA	NA	NA	NA	0	0	0	0	0	0
hsa-mir-4749-3p	NA	NA	NA	NA	NA	NA	0	0	0	0	0	0
hsa-mir-4450	NA	NA	NA	NA	NA	NA	0	0	0	0	0	0
hsa-mir-134-3p	NA	NA	NA	NA	NA	NA	0	0	0	0	0	0
hsa-mir-4471	NA	NA	NA	NA	NA	NA	0	0	0	0	0	0
hsa-mir-8059	NA	NA	NA	NA	NA	NA	0	0	0	0	0	0
hsa-mir-5589-3p	NA	NA	NA	NA	NA	NA	0	0	0	0	0	0
hsa-mir-345-3p	NA	NA	NA	NA	NA	NA	0	0	0	0	0	0
hsa-mir-4732-3p	NA	NA	NA	NA	NA	NA	0	0	0	0	0	0
hsa-mir-6736-3p	NA	NA	NA	NA	NA	NA	0	0	0	0	0	0
hsa-mir-4797-5p	7.70478	-0.124249	0.960101	NA	NA	NA	0	0	0	0	0	0
hsa-mir-1972	NA	NA	NA	NA	NA	NA	0	0	0	0	0	0
hsa-mir-4304	NA	NA	NA	NA	NA	NA	0	0	0	0	0	0
hsa-mir-5187-5p	NA	NA	NA	NA	NA	NA	0	0	0	0	0	0
hsa-mir-6728-5p	NA	NA	NA	NA	NA	NA	0	0	0	0	0	0
hsa-mir-5698	NA	NA	NA	NA	NA	NA	0	0	0	0	0	0
hsa-mir-200b-5p	7.97211	-0.03874	0.992264	NA	NA	NA	3	3	0	0	0	0
hsa-mir-200a-5p	57.8388	-0.143372	0.867015	32.8018	0.152658	0.973026	3	2	0	0	0	0
hsa-mir-4313	NA	NA	NA	NA	NA	NA	0	0	0	0	0	0
hsa-mir-6755-3p	NA	NA	NA	NA	NA	NA	0	0	0	0	0	0
hsa-mir-545-5p	NA	NA	NA	NA	NA	NA	0	0	0	0	0	0
hsa-mir-4641	NA	NA	NA	NA	NA	NA	0	0	0	0	0	0
hsa-mir-653-3p	NA	NA	NA	NA	NA	NA	0	0	0	0	0	0
hsa-mir-642a-3p	NA	NA	NA	NA	NA	NA	0	0	0	0	0	0
hsa-mir-642b-3p	NA	NA	NA	NA	NA	NA	0	0	0	0	0	0
hsa-mir-3191-3p	NA	NA	NA	NA	NA	NA	0	0	0	0	0	0
hsa-mir-7110-3p	20.4158	0.0935258	0.960101	1565.89	0.237082	0.900673	0	0	0	0	0	0
hsa-mir-4716-3p	NA	NA	NA	NA	NA	NA	0	0	0	0	0	0
hsa-mir-6794-5p	NA	NA	NA	NA	NA	NA	0	0	0	0	0	0
hsa-mir-6870-5p	NA	NA	NA	NA	NA	NA	0	0	0	0	0	0
hsa-mir-7111-5p	NA	NA	NA	NA	NA	NA	0	0	0	0	0	0
hsa-mir-6502-3p	NA	NA	NA	NA	NA	NA	0	0	0	0	0	0
hsa-mir-376a-2-5p	NA	NA	NA	NA	NA	NA	0	0	0	0	0	0
hsa-mir-4419a	107.699	0.370678	0.673088	40.9048	0.779171	0.431715	0	0	0	0	0	0
hsa-mir-4510	NA	NA	NA	NA	NA	NA	0	0	0	0	0	0
hsa-mir-4728-5p	NA	NA	NA	NA	NA	NA	1	0	0	0	0	0
hsa-mir-6127	NA	NA	NA	NA	NA	NA	0	0	0	0	0	0
hsa-mir-6129	NA	NA	NA	NA	NA	NA	0	0	0	0	0	0
hsa-mir-6130	NA	NA	NA	NA	NA	NA	0	0	0	0	0	0
hsa-mir-6133	NA	NA	NA	NA	NA	NA	0	0	0	0	0	0
hsa-mir-6785-5p	NA	NA	NA	NA	NA	NA	0	0	0	0	0	0
hsa-mir-6834-5p	NA	NA	NA	NA	NA	NA	0	0	0	0	0	0
hsa-mir-6883-5p	NA	NA	NA	NA	NA	NA	0	0	0	0	0	0
hsa-mir-4283	NA	NA	NA	NA	NA	NA	0	0	0	0	0	0
hsa-mir-6846-5p	NA	NA	NA	NA	NA	NA	0	0	0	0	0	0
hsa-mir-6848-5p	NA	NA	NA	NA	NA	NA	0	0	0	0	0	0
hsa-mir-381-5p	NA	NA	NA	NA	NA	NA	2	1	1	0	0	0
hsa-mir-2053	NA	NA	NA	NA	NA	NA	0	0	0	0	0	0
hsa-mir-4756-3p	NA	NA	NA	NA	NA	NA	0	0	0	0	0	0
hsa-mir-4770	NA	NA	NA	NA	NA	NA	0	0	0	0	0	0
hsa-mir-1273f	45.9628	0.156007	0.867015	30.5729	0.125265	0.973026	0	0	0	0	0	0
hsa-mir-6088	NA	NA	NA	NA	NA	NA	0	0	0	0	0	0
hsa-mir-4684-5p	NA	NA	NA	NA	NA	NA	0	0	0	0	0	0
hsa-mir-7112-5p	NA	NA	NA	NA	NA	NA	0	0	0	0	0	0
hsa-mir-7974	310.911	0.18259	0.733021	NA	NA	NA	0	0	0	0	0	0
hsa-mir-4755-3p	10.3554	0.765148	0.572457	NA	NA	NA	0	0	0	0	0	0
hsa-mir-5006-5p	NA	NA	NA	NA	NA	NA	0	0	0	0	0	0
hsa-mir-3938	NA	NA	NA	NA	NA	NA	0	0	0	0	0	0
hsa-mir-4755-5p	12.7854	0.621944	0.656441	10.146	-1.38352	0.446325	0	0	0	0	0	0
hsa-mir-5006-3p	NA	NA	NA	NA	NA	NA	0	0	0	0	0	0
hsa-mir-6832-3p	NA	NA	NA	NA	NA	NA	0	0	0	0	0	0
hsa-mir-4530	NA	NA	NA	NA	NA	NA	0	0	0	0	0	0
hsa-mir-6858-3p	NA	NA	NA	NA	NA	NA	0	0	0	0	0	0
hsa-mir-6508-5p	NA	NA	NA	NA	NA	NA	0	0	0	0	0	0
hsa-mir-8067	NA	NA	NA	NA	NA	NA	0	0	0	0	0	0
hsa-mir-643	4.84879	0.503497	0.835001	NA	NA	NA	0	0	0	0	0	0
hsa-mir-3591-5p	10.7658	-0.113306	0.960101	15.7023	-0.125494	0.973026	0	0	0	0	0	0
hsa-mir-6730-5p	NA	NA	NA	NA	NA	NA	0	0	0	0	0	0
hsa-mir-4766-3p	NA	NA	NA	NA	NA	NA	0	0	0	0	0	0
hsa-mir-758-5p	NA	NA	NA	NA	NA	NA	0	0	0	0	0	0
hsa-mir-6880-5p	NA	NA	NA	NA	NA	NA	0	0	0	0	0	0
hsa-mir-5692c	NA	NA	NA	NA	NA	NA	0	0	0	0	0	0
hsa-mir-5692b	NA	NA	NA	NA	NA	NA	0	0	0	0	0	0
hsa-mir-4536-5p	NA	NA	NA	NA	NA	NA	0	0	0	0	0	0
hsa-mir-4666b	NA	NA	NA	NA	NA	NA	0	0	0	0	0	0
hsa-mir-29b-1-5p	NA	NA	NA	NA	NA	NA	10	5	0	0	1	0
hsa-mir-550a-3-5p	NA	NA	NA	NA	NA	NA	0	0	0	0	0	0
hsa-mir-1271-3p	NA	NA	NA	NA	NA	NA	0	0	0	0	0	0
hsa-mir-550b-2-5p	NA	NA	NA	NA	NA	NA	0	0	0	0	0	0
hsa-mir-329-5p	NA	NA	NA	NA	NA	NA	1	1	0	0	0	0
hsa-mir-6796-3p	NA	NA	NA	NA	NA	NA	0	0	0	0	0	0
hsa-mir-4255	NA	NA	NA	NA	NA	NA	0	0	0	0	0	0
hsa-mir-138-1-3p	NA	NA	NA	NA	NA	NA	3	3	0	0	0	1
hsa-mir-4303	NA	NA	NA	NA	NA	NA	0	0	0	0	0	0
hsa-mir-4534	NA	NA	NA	NA	NA	NA	0	0	0	0	0	0
hsa-mir-1245b-3p	NA	NA	NA	NA	NA	NA	0	0	0	0	0	0
hsa-mir-8082	NA	NA	NA	NA	NA	NA	0	0	0	0	0	0
hsa-mir-5190	NA	NA	NA	NA	NA	NA	0	0	0	0	0	0
hsa-mir-7845-5p	3.04725	1.47465	0.544139	NA	NA	NA	0	0	0	0	0	0
hsa-mir-6128	NA	NA	NA	NA	NA	NA	0	0	0	0	0	0
hsa-mir-410-5p	NA	NA	NA	NA	NA	NA	1	1	0	0	0	0
hsa-mir-494-5p	NA	NA	NA	NA	NA	NA	3	2	0	0	0	0
hsa-mir-323b-5p	NA	NA	NA	NA	NA	NA	1	1	0	0	0	0
hsa-mir-4327	NA	NA	NA	NA	NA	NA	0	0	0	0	0	0
hsa-mir-3907	NA	NA	NA	NA	NA	NA	0	0	0	0	0	0
hsa-mir-6757-3p	NA	NA	NA	NA	NA	NA	0	0	0	0	0	0
hsa-mir-4269	NA	NA	NA	NA	NA	NA	1	1	0	0	0	0
hsa-mir-6715b-5p	NA	NA	NA	NA	NA	NA	0	0	0	0	0	0
hsa-mir-3180-5p	4.00841	-1.26644	0.557292	NA	NA	NA	1	1	0	0	1	0
hsa-mir-6878-5p	NA	NA	NA	NA	NA	NA	0	0	0	0	0	0
hsa-mir-4433a-3p	NA	NA	NA	NA	NA	NA	0	0	0	0	0	0
hsa-mir-3614-3p	NA	NA	NA	NA	NA	NA	0	0	0	0	0	0
hsa-mir-7641	2035.26	-0.318297	0.551991	12323.8	0.697655	0.307069	0	0	0	0	0	0
hsa-mir-759	NA	NA	NA	NA	NA	NA	0	0	0	0	0	0
hsa-mir-4520-3p	NA	NA	NA	NA	NA	NA	0	0	0	0	0	0
hsa-mir-302b-5p	NA	NA	NA	NA	NA	NA	0	0	0	0	0	0
hsa-mir-302d-5p	NA	NA	NA	NA	NA	NA	0	0	0	0	0	0
hsa-mir-4274	NA	NA	NA	NA	NA	NA	0	0	0	0	0	0
hsa-mir-7109-3p	NA	NA	NA	NA	NA	NA	0	0	0	0	0	0
hsa-mir-6875-3p	NA	NA	NA	NA	NA	NA	0	0	0	0	0	0
hsa-mir-3682-3p	3.80786	-1.68049	0.435796	NA	NA	NA	0	0	0	0	0	0
hsa-mir-7846-3p	NA	NA	NA	NA	NA	NA	0	0	0	0	0	0
hsa-mir-6739-3p	NA	NA	NA	NA	NA	NA	0	0	0	0	0	0
hsa-mir-1306-5p	44.3517	-0.500151	0.436884	21.2263	-0.237127	0.964049	0	0	0	0	0	0
hsa-mir-1298-3p	NA	NA	NA	NA	NA	NA	0	0	0	0	0	0
hsa-mir-3126-3p	NA	NA	NA	NA	NA	NA	0	0	0	0	0	0
hsa-mir-876-5p	NA	NA	NA	NA	NA	NA	0	0	0	0	0	0
hsa-mir-3167	NA	NA	NA	NA	NA	NA	0	0	0	0	0	0
hsa-mir-2276-3p	7.64409	0.372044	0.852534	NA	NA	NA	0	0	0	0	0	0
hsa-mir-5003-5p	NA	NA	NA	NA	NA	NA	0	0	0	0	0	0
hsa-mir-7112-3p	NA	NA	NA	NA	NA	NA	0	0	0	0	0	0
hsa-mir-3156-3p	NA	NA	NA	NA	NA	NA	0	0	0	0	0	0
hsa-mir-3974	NA	NA	NA	NA	NA	NA	0	0	0	0	0	0
hsa-mir-5691	NA	NA	NA	NA	NA	NA	0	0	0	0	0	0
hsa-mir-6805-3p	NA	NA	NA	NA	NA	NA	0	0	0	0	0	0
hsa-mir-6080	NA	NA	NA	NA	NA	NA	0	0	0	0	0	0
hsa-mir-6890-3p	NA	NA	NA	NA	NA	NA	0	0	0	0	0	0
hsa-mir-676-3p	NA	NA	NA	NA	NA	NA	0	0	0	0	0	0
hsa-mir-5009-3p	NA	NA	NA	NA	NA	NA	0	0	0	0	0	0
hsa-mir-4307	NA	NA	NA	NA	NA	NA	0	0	0	0	0	0
hsa-mir-450b-3p	NA	NA	NA	NA	NA	NA	0	0	0	0	0	0
hsa-mir-4769-3p	NA	NA	NA	NA	NA	NA	0	0	0	0	0	0
hsa-mir-6817-5p	NA	NA	NA	NA	NA	NA	0	0	0	0	0	0
hsa-mir-4765	NA	NA	NA	NA	NA	NA	0	0	0	0	0	0
hsa-mir-6751-5p	NA	NA	NA	NA	NA	NA	0	0	0	0	0	0
hsa-mir-6752-5p	NA	NA	NA	NA	NA	NA	0	0	0	0	0	0
hsa-mir-6777-5p	NA	NA	NA	NA	NA	NA	0	0	0	0	0	0
hsa-mir-6803-5p	NA	NA	NA	NA	NA	NA	0	0	0	0	0	0
hsa-mir-6835-5p	NA	NA	NA	NA	NA	NA	0	0	0	0	0	0
hsa-mir-6842-5p	NA	NA	NA	NA	NA	NA	0	0	0	0	0	0
hsa-mir-6889-5p	NA	NA	NA	NA	NA	NA	0	0	0	0	0	0
hsa-mir-7110-5p	NA	NA	NA	NA	NA	NA	0	0	0	0	0	0
hsa-mir-7844-5p	NA	NA	NA	NA	NA	NA	0	0	0	0	0	0
hsa-mir-4330	NA	NA	NA	NA	NA	NA	0	0	0	0	0	0
hsa-mir-4793-3p	NA	NA	NA	NA	NA	NA	0	0	0	0	0	0
hsa-mir-6715a-3p	26.5415	1.77594	0.000696714	13.7902	0.191644	0.973026	0	0	0	0	0	0
hsa-mir-3152-5p	NA	NA	NA	NA	NA	NA	0	0	0	0	0	0
hsa-mir-520a-5p	NA	NA	NA	NA	NA	NA	0	0	0	0	0	0
hsa-mir-525-5p	NA	NA	NA	NA	NA	NA	0	0	0	0	0	0
hsa-mir-1207-3p	NA	NA	NA	NA	NA	NA	1	0	0	0	0	0
hsa-mir-3135a	6.02577	-0.131718	0.960101	NA	NA	NA	0	0	0	0	0	0
hsa-mir-497-3p	NA	NA	NA	NA	NA	NA	2	1	0	0	0	0
hsa-mir-3934-3p	NA	NA	NA	NA	NA	NA	0	0	0	0	0	0
hsa-mir-6854-5p	NA	NA	NA	NA	NA	NA	0	0	0	0	0	0
hsa-mir-3913-3p	NA	NA	NA	NA	NA	NA	0	0	0	0	0	0
hsa-mir-4276	NA	NA	NA	NA	NA	NA	0	0	0	0	0	0
hsa-mir-3942-3p	NA	NA	NA	NA	NA	NA	0	0	0	0	0	0
hsa-mir-4469	NA	NA	NA	NA	NA	NA	0	0	0	0	0	0
hsa-mir-7977	NA	NA	NA	NA	NA	NA	0	0	0	0	0	0
hsa-mir-5701	2086.44	0.0686073	0.960101	137.329	0.350079	0.963302	0	0	0	0	0	0
hsa-mir-223-5p	NA	NA	NA	NA	NA	NA	5	5	0	0	0	0
hsa-mir-3670	NA	NA	NA	NA	NA	NA	0	0	0	0	0	0
hsa-mir-4789-3p	NA	NA	NA	NA	NA	NA	0	0	0	0	0	0
hsa-mir-6841-3p	NA	NA	NA	NA	NA	NA	0	0	0	0	0	0
hsa-mir-96-3p	56.1838	0.221893	0.798174	64.4626	0.307098	0.855645	3	3	0	0	0	0
hsa-mir-2681-3p	NA	NA	NA	NA	NA	NA	0	0	0	0	0	0
hsa-mir-4708-5p	NA	NA	NA	NA	NA	NA	0	0	0	0	0	0
hsa-mir-4712-3p	NA	NA	NA	NA	NA	NA	0	0	0	0	0	0
hsa-mir-6516-3p	NA	NA	NA	NA	NA	NA	0	0	0	0	0	0
hsa-mir-4804-3p	NA	NA	NA	NA	NA	NA	0	0	0	0	0	0
hsa-mir-4637	2.85222	-1.97507	0.43478	NA	NA	NA	0	0	0	0	0	0
hsa-mir-4659a-5p	NA	NA	NA	NA	NA	NA	0	0	0	0	0	0
hsa-mir-4661-3p	8.01575	0.148322	0.960101	NA	NA	NA	0	0	0	0	0	0
hsa-mir-4659b-5p	NA	NA	NA	NA	NA	NA	0	0	0	0	0	0
hsa-mir-4802-5p	NA	NA	NA	NA	NA	NA	0	0	0	0	0	0
hsa-mir-6894-5p	NA	NA	NA	NA	NA	NA	0	0	0	0	0	0
hsa-mir-7154-3p	NA	NA	NA	NA	NA	NA	0	0	0	0	0	0
hsa-mir-5683	NA	NA	NA	NA	NA	NA	0	0	0	0	0	0
hsa-mir-5690	NA	NA	NA	NA	NA	NA	0	0	0	0	0	0
hsa-mir-3978	NA	NA	NA	NA	NA	NA	1	1	0	0	0	0
hsa-mir-5093	NA	NA	NA	NA	NA	NA	0	0	0	0	0	0
hsa-mir-8069	NA	NA	NA	NA	NA	NA	0	0	0	0	0	0
hsa-mir-8075	NA	NA	NA	NA	NA	NA	0	0	0	0	0	0
hsa-mir-3926	NA	NA	NA	NA	NA	NA	0	0	0	0	0	0
hsa-mir-7154-5p	NA	NA	NA	NA	NA	NA	0	0	0	0	0	0
hsa-mir-5681b	NA	NA	NA	NA	NA	NA	0	0	0	0	0	0
hsa-mir-1261	NA	NA	NA	NA	NA	NA	0	0	0	0	0	0
hsa-mir-8081	NA	NA	NA	NA	NA	NA	0	0	0	0	0	0
hsa-mir-3120-5p	NA	NA	NA	NA	NA	NA	0	0	0	0	0	0
hsa-mir-4743-3p	NA	NA	NA	NA	NA	NA	0	0	0	0	0	0
hsa-mir-6807-3p	NA	NA	NA	NA	NA	NA	0	0	0	0	0	0
hsa-mir-4468	NA	NA	NA	NA	NA	NA	0	0	0	0	0	0
hsa-mir-640	NA	NA	NA	NA	NA	NA	0	0	0	0	0	0
hsa-mir-4753-3p	NA	NA	NA	NA	NA	NA	0	0	0	0	0	0
hsa-mir-556-3p	9.22055	0.403042	0.812993	NA	NA	NA	0	0	0	0	0	0
hsa-mir-4457	NA	NA	NA	NA	NA	NA	0	0	0	0	0	0
hsa-mir-302f	NA	NA	NA	NA	NA	NA	0	0	0	0	0	0
hsa-mir-487a-5p	NA	NA	NA	NA	NA	NA	0	0	0	0	0	0
hsa-mir-487b-5p	NA	NA	NA	NA	NA	NA	0	0	0	0	0	0
hsa-mir-4790-3p	NA	NA	NA	NA	NA	NA	0	0	0	0	0	0
hsa-mir-205-3p	NA	NA	NA	NA	NA	NA	3	3	0	0	0	0
hsa-mir-6830-5p	NA	NA	NA	NA	NA	NA	0	0	0	0	0	0
hsa-mir-4646-3p	NA	NA	NA	NA	NA	NA	0	0	0	0	0	0
hsa-mir-1233-5p	NA	NA	NA	NA	NA	NA	0	0	0	0	0	0
hsa-mir-6778-5p	NA	NA	NA	NA	NA	NA	0	0	0	0	0	0
hsa-mir-4722-3p	NA	NA	NA	NA	NA	NA	0	0	0	0	0	0
hsa-mir-6727-3p	NA	NA	NA	NA	NA	NA	0	0	0	0	0	0
hsa-mir-4704-5p	NA	NA	NA	NA	NA	NA	0	0	0	0	0	0
hsa-mir-6868-5p	NA	NA	NA	NA	NA	NA	0	0	0	0	0	0
hsa-mir-4687-5p	NA	NA	NA	NA	NA	NA	0	0	0	0	0	0
hsa-mir-6779-3p	NA	NA	NA	NA	NA	NA	0	0	0	0	0	0
hsa-mir-6853-5p	NA	NA	NA	NA	NA	NA	0	0	0	0	0	0
hsa-mir-4475	NA	NA	NA	NA	NA	NA	0	0	0	0	0	0
hsa-mir-6775-3p	NA	NA	NA	NA	NA	NA	0	0	0	0	0	0
hsa-mir-3918	NA	NA	NA	NA	NA	NA	0	0	0	0	0	0
hsa-mir-4640-5p	NA	NA	NA	NA	NA	NA	0	0	0	0	0	0
hsa-mir-4726-5p	NA	NA	NA	NA	NA	NA	0	0	0	0	0	0
hsa-mir-6501-3p	NA	NA	NA	NA	NA	NA	0	0	0	0	0	0
hsa-mir-6895-5p	NA	NA	NA	NA	NA	NA	0	0	0	0	0	0
hsa-mir-8057	NA	NA	NA	NA	NA	NA	0	0	0	0	0	0
hsa-mir-4445-3p	NA	NA	NA	NA	NA	NA	0	0	0	0	0	0
hsa-mir-548al	NA	NA	NA	NA	NA	NA	0	0	0	0	0	0
hsa-mir-6507-3p	NA	NA	NA	NA	NA	NA	0	0	0	0	0	0
hsa-mir-6499-3p	NA	NA	NA	NA	NA	NA	0	0	0	0	0	0
hsa-mir-6815-5p	NA	NA	NA	NA	NA	NA	0	0	0	0	0	0
hsa-mir-6865-5p	NA	NA	NA	NA	NA	NA	0	0	0	0	0	0
hsa-mir-323b-3p	NA	NA	NA	NA	NA	NA	0	0	0	0	0	0
hsa-mir-4434	NA	NA	NA	NA	NA	NA	0	0	0	0	0	0
hsa-mir-5703	NA	NA	NA	NA	NA	NA	0	0	0	0	0	0
hsa-mir-4481	NA	NA	NA	NA	NA	NA	0	0	0	0	0	0
hsa-mir-4745-5p	7.77131	-0.805282	0.608199	13.2245	-1.04849	0.645069	0	0	0	0	0	0
hsa-mir-598-5p	NA	NA	NA	NA	NA	NA	0	0	0	0	0	0
hsa-mir-3688-3p	28.6469	0.707027	0.295164	NA	NA	NA	0	0	0	0	0	0
hsa-mir-891b	NA	NA	NA	NA	NA	NA	1	1	0	0	1	0
hsa-mir-5585-5p	NA	NA	NA	NA	NA	NA	0	0	0	0	0	0
hsa-mir-6888-5p	NA	NA	NA	NA	NA	NA	0	0	0	0	0	0
hsa-mir-3179	13.602	-0.251134	0.872015	13.1798	-0.632886	0.810307	0	0	0	0	0	0
hsa-mir-4639-3p	NA	NA	NA	NA	NA	NA	0	0	0	0	0	0
hsa-mir-6810-5p	NA	NA	NA	NA	NA	NA	0	0	0	0	0	0
hsa-mir-1255a	87.9486	0.325464	0.577073	112.226	-0.81231	0.257195	0	0	0	0	0	0
hsa-mir-1255b-5p	6.27244	-0.567736	0.773549	NA	NA	NA	0	0	0	0	0	0
hsa-mir-4700-3p	NA	NA	NA	NA	NA	NA	0	0	0	0	0	0
hsa-mir-4740-5p	NA	NA	NA	NA	NA	NA	0	0	0	0	0	0
hsa-mir-539-3p	NA	NA	NA	NA	NA	NA	1	1	0	0	0	0
hsa-mir-4688	NA	NA	NA	NA	NA	NA	0	0	0	0	0	0
hsa-mir-6743-5p	NA	NA	NA	NA	NA	NA	0	0	0	0	0	0
hsa-mir-6789-5p	NA	NA	NA	NA	NA	NA	0	0	0	0	0	0
hsa-mir-5004-3p	NA	NA	NA	NA	NA	NA	0	0	0	0	0	0
hsa-mir-6514-5p	2.64195	-1.04034	0.736535	NA	NA	NA	0	0	0	0	0	0
hsa-mir-1537-5p	NA	NA	NA	NA	NA	NA	0	0	0	0	0	0
hsa-mir-4308	NA	NA	NA	NA	NA	NA	0	0	0	0	0	0
hsa-mir-4292	NA	NA	NA	NA	NA	NA	0	0	0	0	0	0
hsa-mir-4291	NA	NA	NA	NA	NA	NA	0	0	0	0	0	0
hsa-mir-6791-5p	NA	NA	NA	NA	NA	NA	0	0	0	0	0	0
hsa-mir-1-5p	NA	NA	NA	NA	NA	NA	11	10	0	0	0	1
hsa-mir-4714-3p	NA	NA	NA	NA	NA	NA	0	0	0	0	0	0
hsa-mir-1269a	16040.5	-0.123083	0.798174	14873.6	-0.320732	0.610515	1	1	0	0	0	0
hsa-mir-1269b	13509.2	0.581297	0.0246987	8147.26	-0.019958	0.973026	1	1	0	1	0	0
hsa-mir-4529-3p	NA	NA	NA	NA	NA	NA	0	0	0	0	0	0
hsa-mir-4520-2-3p	NA	NA	NA	NA	NA	NA	0	0	0	0	0	0
hsa-mir-5009-5p	15.0736	0.118848	0.960101	15.999	-0.600454	0.810307	0	0	0	0	0	0
hsa-mir-7850-5p	NA	NA	NA	NA	NA	NA	0	0	0	0	0	0
hsa-mir-8058	NA	NA	NA	NA	NA	NA	0	0	0	0	0	0
hsa-mir-4494	NA	NA	NA	NA	NA	NA	0	0	0	0	0	0
hsa-mir-499b-5p	NA	NA	NA	NA	NA	NA	0	0	0	0	0	0
hsa-mir-493-5p	NA	NA	NA	NA	NA	NA	3	3	1	0	0	0
hsa-mir-6758-3p	NA	NA	NA	NA	NA	NA	0	0	0	0	0	0
hsa-mir-627-5p	NA	NA	NA	NA	NA	NA	1	1	0	0	0	0
hsa-mir-8055	NA	NA	NA	NA	NA	NA	0	0	0	0	0	0
hsa-mir-4474-3p	3.50365	-0.660608	0.826436	NA	NA	NA	0	0	0	0	0	0
hsa-mir-3140-5p	NA	NA	NA	NA	NA	NA	0	0	0	0	0	0
hsa-mir-3667-5p	NA	NA	NA	NA	NA	NA	0	0	0	0	0	0
hsa-mir-4761-5p	NA	NA	NA	NA	NA	NA	0	0	0	0	0	0
hsa-mir-6801-5p	NA	NA	NA	NA	NA	NA	0	0	0	0	0	0
hsa-mir-3605-5p	3.0246	0.275114	0.960101	NA	NA	NA	0	0	0	0	0	0
hsa-mir-363-5p	NA	NA	NA	NA	NA	NA	1	1	0	0	0	0
hsa-mir-369-3p	NA	NA	NA	NA	NA	NA	2	2	0	1	0	0
hsa-mir-323a-5p	NA	NA	NA	NA	NA	NA	0	0	0	0	0	0
hsa-mir-4483	NA	NA	NA	NA	NA	NA	0	0	0	0	0	0
hsa-mir-6745	NA	NA	NA	NA	NA	NA	0	0	0	0	0	0
hsa-mir-8074	NA	NA	NA	NA	NA	NA	0	0	0	0	0	0
hsa-mir-1238-5p	NA	NA	NA	NA	NA	NA	0	0	0	0	0	0
hsa-mir-4658	NA	NA	NA	NA	NA	NA	0	0	0	0	0	0
hsa-mir-4758-5p	NA	NA	NA	NA	NA	NA	0	0	0	0	0	0
hsa-mir-6790-5p	NA	NA	NA	NA	NA	NA	0	0	0	0	0	0
hsa-mir-100-3p	NA	NA	NA	NA	NA	NA	1	1	0	0	0	0
hsa-mir-514b-5p	NA	NA	NA	NA	NA	NA	0	0	0	0	0	0
hsa-mir-6741-3p	NA	NA	NA	NA	NA	NA	0	0	0	0	0	0
hsa-mir-4783-3p	NA	NA	NA	NA	NA	NA	0	0	0	0	0	0
hsa-mir-4774-3p	NA	NA	NA	NA	NA	NA	0	0	0	0	0	0
hsa-mir-20b-3p	NA	NA	NA	NA	NA	NA	1	1	0	0	0	0
hsa-mir-1343-3p	32.1978	-0.657062	0.35082	25.1881	-0.366041	0.900673	0	0	0	0	0	0
hsa-mir-6783-3p	5.19312	-0.449066	0.867015	NA	NA	NA	0	0	0	0	0	0
hsa-mir-4662a-5p	NA	NA	NA	NA	NA	NA	0	0	0	0	0	0
hsa-mir-3129-3p	35.3537	-0.190162	0.867015	19.3984	-0.192397	0.973026	0	0	0	0	0	0
hsa-mir-5583-5p	NA	NA	NA	NA	NA	NA	0	0	0	0	0	0
hsa-mir-4762-5p	NA	NA	NA	NA	NA	NA	0	0	0	0	0	0
hsa-mir-1247-3p	16.6138	-1.20914	0.169199	NA	NA	NA	0	0	0	0	0	0
hsa-mir-1265	NA	NA	NA	NA	NA	NA	0	0	0	0	0	0
hsa-mir-2355-3p	17.9536	-0.732913	0.43733	14.5314	-0.479481	0.898417	1	1	0	0	0	0
hsa-mir-4776-3p	NA	NA	NA	NA	NA	NA	0	0	0	0	0	0
hsa-mir-6837-3p	NA	NA	NA	NA	NA	NA	0	0	0	0	0	0
hsa-mir-6868-3p	NA	NA	NA	NA	NA	NA	0	0	0	0	0	0
hsa-mir-4433a-5p	NA	NA	NA	NA	NA	NA	0	0	0	0	0	0
hsa-mir-4721	NA	NA	NA	NA	NA	NA	0	0	0	0	0	0
hsa-mir-4653-3p	NA	NA	NA	NA	NA	NA	1	1	0	0	0	0
hsa-mir-514a-5p	NA	NA	NA	NA	NA	NA	1	1	0	0	0	0
hsa-mir-6861-5p	NA	NA	NA	NA	NA	NA	0	0	0	0	0	0
hsa-mir-6757-5p	NA	NA	NA	NA	NA	NA	0	0	0	0	0	0
hsa-mir-621	3.10908	0.207541	0.960101	NA	NA	NA	0	0	0	0	0	0
hsa-mir-675-3p	NA	NA	NA	NA	NA	NA	2	2	0	0	0	0
hsa-mir-3149	14.9059	-0.220751	0.885855	18.0688	0.377423	0.892778	0	0	0	0	0	0
hsa-mir-3672	NA	NA	NA	NA	NA	NA	0	0	0	0	0	0
hsa-mir-6864-3p	NA	NA	NA	NA	NA	NA	0	0	0	0	0	0
hsa-mir-6882-3p	NA	NA	NA	NA	NA	NA	0	0	0	0	0	0
hsa-mir-4705	NA	NA	NA	NA	NA	NA	0	0	0	0	0	0
hsa-mir-587	NA	NA	NA	NA	NA	NA	1	1	0	1	0	0
hsa-mir-4691-3p	NA	NA	NA	NA	NA	NA	0	0	0	0	0	0
hsa-mir-593-3p	NA	NA	NA	NA	NA	NA	2	1	0	0	0	0
hsa-mir-6818-3p	NA	NA	NA	NA	NA	NA	0	0	0	0	0	0
hsa-mir-6895-3p	NA	NA	NA	NA	NA	NA	0	0	0	0	0	0
hsa-mir-3202	NA	NA	NA	NA	NA	NA	0	0	0	0	0	0
hsa-mir-4762-3p	13.9103	-0.438284	0.739986	14.5213	-0.375065	0.900673	0	0	0	0	0	0
hsa-mir-3689a-5p	NA	NA	NA	NA	NA	NA	0	0	0	0	0	0
hsa-mir-3689b-5p	NA	NA	NA	NA	NA	NA	0	0	0	0	0	0
hsa-mir-3689e	NA	NA	NA	NA	NA	NA	0	0	0	0	0	0
hsa-mir-3689f	NA	NA	NA	NA	NA	NA	0	0	0	0	0	0
hsa-mir-1272	4.74113	1.36354	0.480387	NA	NA	NA	0	0	0	0	0	0
hsa-mir-6724-5p	14.6882	0.194944	0.913392	NA	NA	NA	0	0	0	0	0	0
hsa-mir-6773-5p	NA	NA	NA	NA	NA	NA	0	0	0	0	0	0
hsa-mir-5194	NA	NA	NA	NA	NA	NA	0	0	0	0	0	0
hsa-mir-6738-5p	NA	NA	NA	NA	NA	NA	0	0	0	0	0	0
hsa-mir-6069	NA	NA	NA	NA	NA	NA	0	0	0	0	0	0
hsa-mir-4505	NA	NA	NA	NA	NA	NA	0	0	0	0	0	0
hsa-mir-6842-3p	21.6251	-0.209072	0.867015	29.2906	-0.401202	0.834121	0	0	0	0	0	0
hsa-mir-4525	NA	NA	NA	NA	NA	NA	0	0	0	0	0	0
hsa-mir-5010-5p	NA	NA	NA	NA	NA	NA	0	0	0	0	0	0
hsa-mir-6873-5p	NA	NA	NA	NA	NA	NA	0	0	0	0	0	0
hsa-mir-7973	NA	NA	NA	NA	NA	NA	0	0	0	0	0	0
hsa-mir-2467-3p	NA	NA	NA	NA	NA	NA	0	0	0	0	0	0
hsa-mir-6746-3p	NA	NA	NA	NA	NA	NA	0	0	0	0	0	0
hsa-mir-1185-5p	NA	NA	NA	NA	NA	NA	0	0	0	0	0	0
hsa-mir-3679-5p	24.0627	-1.60262	0.0169314	13.205	-0.257609	0.973026	0	0	0	0	0	0
hsa-mir-219a-2-3p	NA	NA	NA	NA	NA	NA	0	0	0	0	0	0
hsa-mir-141-5p	NA	NA	NA	NA	NA	NA	4	4	0	2	1	0
hsa-mir-5195-3p	NA	NA	NA	NA	NA	NA	0	0	0	0	0	0
hsa-mir-3151-5p	NA	NA	NA	NA	NA	NA	0	0	0	0	0	0
hsa-mir-6742-5p	NA	NA	NA	NA	NA	NA	0	0	0	0	0	0
hsa-mir-6742-3p	NA	NA	NA	NA	NA	NA	0	0	0	0	0	0
hsa-mir-6776-5p	NA	NA	NA	NA	NA	NA	0	0	0	0	0	0
hsa-mir-1275	221.987	0.727611	0.0145709	33.8664	0.433732	0.810307	0	0	0	0	0	0
hsa-mir-4665-5p	NA	NA	NA	NA	NA	NA	0	0	0	0	0	0
hsa-mir-4747-3p	NA	NA	NA	NA	NA	NA	0	0	0	0	0	0
hsa-mir-1295b-3p	NA	NA	NA	NA	NA	NA	0	0	0	0	0	0
hsa-mir-6761-5p	5.91	-0.82206	0.652409	NA	NA	NA	0	0	0	0	0	0
hsa-mir-6823-5p	NA	NA	NA	NA	NA	NA	0	0	0	0	0	0
hsa-mir-604	NA	NA	NA	NA	NA	NA	0	0	0	0	0	0
hsa-mir-647	NA	NA	NA	NA	NA	NA	1	1	0	0	0	0
hsa-mir-5693	NA	NA	NA	NA	NA	NA	0	0	0	0	0	0
hsa-mir-6732-5p	NA	NA	NA	NA	NA	NA	0	0	0	0	0	0
hsa-mir-6762-3p	NA	NA	NA	NA	NA	NA	0	0	0	0	0	0
hsa-mir-4763-5p	NA	NA	NA	NA	NA	NA	0	0	0	0	0	0
hsa-mir-6894-3p	NA	NA	NA	NA	NA	NA	0	0	0	0	0	0
hsa-mir-6804-3p	NA	NA	NA	NA	NA	NA	0	0	0	0	0	0
hsa-mir-3171	27.212	0.550371	0.646124	NA	NA	NA	0	0	0	0	0	0
hsa-mir-5004-5p	NA	NA	NA	NA	NA	NA	0	0	0	0	0	0
hsa-mir-3064-3p	NA	NA	NA	NA	NA	NA	0	0	0	0	0	0
hsa-mir-3940-3p	20.2644	0.218547	0.879936	NA	NA	NA	0	0	0	0	0	0
hsa-mir-6746-5p	NA	NA	NA	NA	NA	NA	0	0	0	0	0	0
hsa-mir-1976	NA	NA	NA	NA	NA	NA	0	0	0	0	0	0
hsa-mir-3653-5p	11.0231	0.365964	0.829831	NA	NA	NA	0	0	0	0	0	0
hsa-mir-619-5p	64.0097	0.0154254	0.992264	43.6305	-0.0688087	0.973026	0	0	0	0	0	0
hsa-mir-301a-5p	84.9404	-0.818548	0.0503965	24.1399	-1.30874	0.272325	3	3	0	0	0	0
hsa-mir-301b-5p	3.45068	-0.411611	0.914577	NA	NA	NA	1	1	0	0	0	0
hsa-mir-3921	NA	NA	NA	NA	NA	NA	0	0	0	0	0	0
hsa-mir-4653-5p	NA	NA	NA	NA	NA	NA	0	0	0	0	0	0
hsa-mir-3175	NA	NA	NA	NA	NA	NA	0	0	0	0	0	0
hsa-mir-4793-5p	NA	NA	NA	NA	NA	NA	0	0	0	0	0	0
hsa-mir-5196-3p	NA	NA	NA	NA	NA	NA	0	0	0	0	0	0
hsa-mir-758-3p	NA	NA	NA	NA	NA	NA	2	1	0	0	0	0
hsa-mir-6808-3p	NA	NA	NA	NA	NA	NA	0	0	0	0	0	0
hsa-mir-5587-5p	NA	NA	NA	NA	NA	NA	0	0	0	0	0	0
hsa-mir-653-5p	109.495	0.539898	0.231181	53.2821	0.908935	0.278404	0	0	0	0	0	0
hsa-mir-4253	NA	NA	NA	NA	NA	NA	0	0	0	0	0	0
hsa-mir-6862-5p	NA	NA	NA	NA	NA	NA	0	0	0	0	0	0
hsa-mir-4727-5p	NA	NA	NA	NA	NA	NA	0	0	0	0	0	0
hsa-mir-4267	NA	NA	NA	NA	NA	NA	0	0	0	0	0	0
hsa-mir-1322	NA	NA	NA	NA	NA	NA	0	0	0	0	0	0
hsa-mir-6826-5p	NA	NA	NA	NA	NA	NA	0	0	0	0	0	0
hsa-mir-888-3p	NA	NA	NA	NA	NA	NA	0	0	0	0	0	0
hsa-mir-4489	NA	NA	NA	NA	NA	NA	0	0	0	0	0	0
hsa-mir-6085	NA	NA	NA	NA	NA	NA	0	0	0	0	0	0
hsa-mir-6813-5p	NA	NA	NA	NA	NA	NA	0	0	0	0	0	0
hsa-mir-4258	NA	NA	NA	NA	NA	NA	0	0	0	0	0	0
hsa-mir-5584-3p	NA	NA	NA	NA	NA	NA	0	0	0	0	0	0
hsa-mir-3620-5p	NA	NA	NA	NA	NA	NA	0	0	0	0	0	0
hsa-mir-4417	NA	NA	NA	NA	NA	NA	0	0	0	0	0	0
hsa-mir-1587	NA	NA	NA	NA	NA	NA	0	0	0	0	0	0
hsa-mir-6829-5p	NA	NA	NA	NA	NA	NA	0	0	0	0	0	0
hsa-mir-5011-3p	NA	NA	NA	NA	NA	NA	0	0	0	0	0	0
hsa-mir-3160-5p	NA	NA	NA	NA	NA	NA	0	0	0	0	0	0
hsa-mir-5687	14.0679	-0.439362	0.736535	17.6561	0.593929	0.809572	0	0	0	0	0	0
hsa-mir-4675	NA	NA	NA	NA	NA	NA	0	0	0	0	0	0
hsa-mir-4741	4.7244	0.220051	0.960101	NA	NA	NA	0	0	0	0	0	0
hsa-mir-6805-5p	NA	NA	NA	NA	NA	NA	0	0	0	0	0	0
hsa-mir-3664-3p	71.7483	0.371687	0.608199	34.856	-0.00404311	0.999084	0	0	0	0	0	0
hsa-mir-8088	NA	NA	NA	NA	NA	NA	0	0	0	0	0	0
hsa-mir-1973	NA	NA	NA	NA	NA	NA	0	0	0	0	0	0
hsa-mir-541-5p	NA	NA	NA	NA	NA	NA	0	0	0	0	0	0
hsa-mir-4302	NA	NA	NA	NA	NA	NA	0	0	0	0	0	0
hsa-mir-7843-3p	NA	NA	NA	NA	NA	NA	0	0	0	0	0	0
hsa-mir-4764-3p	NA	NA	NA	NA	NA	NA	0	0	0	0	0	0
hsa-mir-764	NA	NA	NA	NA	NA	NA	0	0	0	0	0	0
hsa-mir-6512-3p	NA	NA	NA	NA	NA	NA	0	0	0	0	0	0
hsa-mir-6720-5p	NA	NA	NA	NA	NA	NA	0	0	0	0	0	0
hsa-mir-6733-3p	NA	NA	NA	NA	NA	NA	0	0	0	0	0	0
hsa-mir-4294	NA	NA	NA	NA	NA	NA	0	0	0	0	0	0
[truncated: 600 more rows]
