# Supplementary material
Source: HighWire-hosted journal article supplement (doi:10.1101/rna.080097.124)
Supplement: Supplemental_TableS13.xlsx [file Supplemental_TableS13.xlsx]

## Sheet: hsa-mir-10b_targets_DE_oprava
ensembl_gene_id	Target Gene (Entrez Gene ID)	miRTarBase ID	miRNA	Species (miRNA)	Target Gene	Species (Target Gene)	Experiments	Support Type	References (PMID)	hgnc_symbol	chromosome_name	baseMean_total	log2FoldChange_total	lfcSE_total	stat_total	pvalue_total	padj_total	baseMean_polysomes	log2FoldChange_polysomes	lfcSE_polysomes	stat_polysomes	pvalue_polysomes	padj_polysomes
ENSG00000003436	7035	MIRT515691	hsa-mir-10b-5p	Homo sapiens	TFPI	Homo sapiens	PAR-CLIP	Functional MTI (Weak)	23446348	TFPI	2	8911.03	0.746935	0.133724	5.58566	2.32818e-08	5.22731e-07	5144.98	-0.0616379	0.155336	-0.396804	0.691512	0.882667
ENSG00000005022	292	MIRT047467	hsa-mir-10b-5p	Homo sapiens	SLC25A5	Homo sapiens	CLASH	Functional MTI (Weak)	23622248	SLC25A5	X	20372.1	0.182533	0.109138	1.6725	0.0944256	0.236205	21394.5	0.263201	0.197528	1.33247	0.182704	0.510753
ENSG00000005302	10943	MIRT047419	hsa-mir-10b-5p	Homo sapiens	MSL3	Homo sapiens	CLASH	Functional MTI (Weak)	23622248	MSL3	X	92.2785	-10.0491	1.19902	-8.3811	5.2437e-17	3.5935e-15	100.148	1.28129	1.68732	0.759366	0.447634	0.746041
ENSG00000006007	51573	MIRT761155	hsa-mir-10b-3p	Homo sapiens	GDE1	Homo sapiens	PAR-CLIP	Functional MTI (Weak)	27292025	GDE1	16	1965.27	0.393758	0.12764	3.08491	0.00203613	0.0120204	3025.16	-0.00211586	0.201808	-0.0104845	0.991635	0.997021
ENSG00000007168	5048	MIRT076414	hsa-mir-10b-5p	Homo sapiens	PAFAH1B1	Homo sapiens	PAR-CLIP	Functional MTI (Weak)	23446348	PAFAH1B1	17	5807.66	-0.00862991	0.112739	-0.0765476	0.938983	0.97189	3035.34	-0.391624	0.18479	-2.11929	0.0340658	0.219006
ENSG00000007202	9703	MIRT047481	hsa-mir-10b-5p	Homo sapiens	KIAA0100	Homo sapiens	CLASH	Functional MTI (Weak)	23622248	KIAA0100	17	20002.8	-0.237737	0.105924	-2.24442	0.0248055	0.0884617	15232.1	-0.215457	0.169957	-1.26771	0.2049	0.539115
ENSG00000007255	79090	MIRT617110	hsa-mir-10b-3p	Homo sapiens	TRAPPC6A	Homo sapiens	HITS-CLIP	Functional MTI (Weak)	23824327	TRAPPC6A	19	670.861	0.140677	0.206301	0.681904	0.495299	0.692116	1128.69	0.759343	0.347891	2.1827	0.0290577	0.200806
ENSG00000007372	5080	MIRT006925	hsa-mir-10b-5p	Homo sapiens	PAX6	Homo sapiens	Luciferase reporter assay	Functional MTI	23034333	PAX6	11	532.948	0.427797	0.145075	2.94881	0.00319	0.017349	381.969	-0.200035	0.331772	-0.60293	0.546555	0.805128
ENSG00000007392	55692	MIRT556402	hsa-mir-10b-3p	Homo sapiens	LUC7L	Homo sapiens	PAR-CLIP	Functional MTI (Weak)	21572407	LUC7L	16	2480.8	-0.021438	0.114466	-0.187287	0.851436	0.928178	2042.66	0.253928	0.158319	1.6039	0.108736	0.401484
ENSG00000010803	22955	MIRT047441	hsa-mir-10b-5p	Homo sapiens	SCMH1	Homo sapiens	CLASH	Functional MTI (Weak)	23622248	SCMH1	1	2450.53	-0.251164	0.114539	-2.19282	0.0283201	0.0974019	4592.48	-0.000486714	0.13256	-0.00367164	0.99707	0.999038
ENSG00000010818	3097	MIRT439126	hsa-mir-10b-5p	Homo sapiens	HIVEP2	Homo sapiens	3'LIFE	Functional MTI (Weak)	25074381	HIVEP2	6	983.743	-0.631061	0.124089	-5.08555	3.66555e-07	6.38723e-06	413.886	-0.142133	0.215611	-0.659211	0.50976	0.783694
ENSG00000012048	672	MIRT734345	hsa-mir-10b-5p	Homo sapiens	BRCA1	Homo sapiens	Immunocytochemistry//qRT-PCR	Functional MTI (Weak)	26392359	BRCA1	17	4505.72	-0.356642	0.128691	-2.7713	0.00558336	0.0275451	1802.4	-0.231462	0.192306	-1.20362	0.228738	0.563389
ENSG00000012232	2137	MIRT047402	hsa-mir-10b-5p	Homo sapiens	EXTL3	Homo sapiens	CLASH	Functional MTI (Weak)	23622248	EXTL3	8	2007.57	0.206281	0.146434	1.40869	0.158926	0.340588	1504.96	0.0407085	0.144797	0.281142	0.778602	0.920349
ENSG00000015171	10771	MIRT056370	hsa-mir-10b-5p	Homo sapiens	ZMYND11	Homo sapiens	3'LIFE	Functional MTI (Weak)	25074381	ZMYND11	10	4009.32	0.0992284	0.119655	0.82929	0.406941	0.620032	3559.23	-0.323997	0.245516	-1.31966	0.186949	0.515534
ENSG00000015479	9782	MIRT473563	hsa-mir-10b-3p	Homo sapiens	MATR3	Homo sapiens	PAR-CLIP	Functional MTI (Weak)	26701625	MATR3	5	207.234	0.440432	0.271348	1.62313	0.104562	0.253919	69.0136	-0.33138	0.535234	-0.61913	0.535831	0.799165
ENSG00000015479	9782	MIRT473563	hsa-mir-10b-3p	Homo sapiens	MATR3	Homo sapiens	PAR-CLIP	Functional MTI (Weak)	23592263	MATR3	5	207.234	0.440432	0.271348	1.62313	0.104562	0.253919	69.0136	-0.33138	0.535234	-0.61913	0.535831	0.799165
ENSG00000016391	55349	MIRT626438	hsa-mir-10b-5p	Homo sapiens	CHDH	Homo sapiens	HITS-CLIP	Functional MTI (Weak)	23824327	CHDH	3	2778.24	0.248143	0.108838	2.27993	0.0226121	0.0823343	1827.8	0.141876	0.249308	0.56908	0.569302	0.820276
ENSG00000017797	10928	MIRT047496	hsa-mir-10b-5p	Homo sapiens	RALBP1	Homo sapiens	CLASH	Functional MTI (Weak)	23622248	RALBP1	18	5591.8	0.100315	0.111889	0.896559	0.369954	0.583677	6317.42	-0.453239	0.167017	-2.71372	0.00665315	0.0839839
ENSG00000025293	51230	MIRT618834	hsa-mir-10b-5p	Homo sapiens	PHF20	Homo sapiens	HITS-CLIP	Functional MTI (Weak)	23824327	PHF20	20	3154.67	-0.0838646	0.125447	-0.668527	0.503797	0.698965	2338.62	-0.125578	0.162851	-0.771123	0.440634	0.740096
ENSG00000028277	5452	MIRT666871	hsa-mir-10b-5p	Homo sapiens	POU2F2	Homo sapiens	HITS-CLIP	Functional MTI (Weak)	23824327	POU2F2	19	40.4055	0.182011	0.347749	0.523396	0.600699	0.773761	NA	NA	NA	NA	NA	NA
ENSG00000030419	22807	MIRT496617	hsa-mir-10b-3p	Homo sapiens	IKZF2	Homo sapiens	PAR-CLIP	Functional MTI (Weak)	22291592	IKZF2	2	12.902	-0.202228	0.57885	-0.349362	0.726818	0.854538	NA	NA	NA	NA	NA	NA
ENSG00000033100	54480	MIRT047492	hsa-mir-10b-5p	Homo sapiens	CHPF2	Homo sapiens	CLASH	Functional MTI (Weak)	23622248	CHPF2	7	1665.59	0.303829	0.147902	2.05426	0.0399505	0.125682	880.279	0.369689	0.242706	1.5232	0.12771	0.436155
ENSG00000049239	9563	MIRT707242	hsa-mir-10b-5p	Homo sapiens	H6PD	Homo sapiens	HITS-CLIP	Functional MTI (Weak)	21572407	H6PD	1	4871.82	0.365028	0.112849	3.23465	0.00121793	0.00783757	2521.74	-0.191319	0.240817	-0.794457	0.426929	0.732639
ENSG00000054392	55733	MIRT439127	hsa-mir-10b-5p	Homo sapiens	HHAT	Homo sapiens	3'LIFE	Functional MTI (Weak)	25074381	HHAT	1	22.3527	-0.0762749	0.436436	-0.174768	0.861262	0.932277	NA	NA	NA	NA	NA	NA
ENSG00000059804	6515	MIRT047414	hsa-mir-10b-5p	Homo sapiens	SLC2A3	Homo sapiens	CLASH	Functional MTI (Weak)	23622248	SLC2A3	12	NA	NA	NA	NA	NA	NA	NA	NA	NA	NA	NA	NA
ENSG00000066654	55623	MIRT047484	hsa-mir-10b-5p	Homo sapiens	THUMPD1	Homo sapiens	CLASH	Functional MTI (Weak)	23622248	THUMPD1	16	2142.19	0.189062	0.127641	1.4812	0.138552	0.309832	1895.74	-0.376047	0.169592	-2.21737	0.026598	0.189976
ENSG00000066777	10565	MIRT047437	hsa-mir-10b-5p	Homo sapiens	ARFGEF1	Homo sapiens	CLASH	Functional MTI (Weak)	23622248	ARFGEF1	8	4597.24	0.183823	0.120274	1.52837	0.126421	0.290704	2337.86	-0.580128	0.185399	-3.12908	0.00175357	0.0376472
ENSG00000067992	5165	MIRT707965	hsa-mir-10b-5p	Homo sapiens	PDK3	Homo sapiens	HITS-CLIP	Functional MTI (Weak)	21572407	PDK3	X	285.627	0.391712	0.203389	1.92592	0.054114	0.157605	164.729	-0.032263	0.278948	-0.11566	0.907922	0.96581
ENSG00000069667	6095	MIRT546706	hsa-mir-10b-5p	Homo sapiens	RORA	Homo sapiens	PAR-CLIP	Functional MTI (Weak)	21572407	RORA	15	219.716	0.128149	0.184811	0.693407	0.488054	0.686867	146.795	-0.0436661	0.274436	-0.159112	0.873581	0.953019
ENSG00000069667	6095	MIRT546706	hsa-mir-10b-5p	Homo sapiens	RORA	Homo sapiens	PAR-CLIP	Functional MTI (Weak)	20371350	RORA	15	219.716	0.128149	0.184811	0.693407	0.488054	0.686867	146.795	-0.0436661	0.274436	-0.159112	0.873581	0.953019
ENSG00000070756	26986	MIRT047501	hsa-mir-10b-5p	Homo sapiens	PABPC1	Homo sapiens	CLASH	Functional MTI (Weak)	23622248	PABPC1	8	45924.5	-0.0138308	0.112687	-0.122737	0.902316	0.953451	73852.3	0.0362169	0.244421	0.148175	0.882205	0.956519
ENSG00000072310	6720	MIRT439117	hsa-mir-10b-5p	Homo sapiens	SREBF1	Homo sapiens	3'LIFE	Functional MTI (Weak)	25074381	SREBF1	17	4565.47	0.412193	0.172011	2.39631	0.0165609	0.0649352	2165.07	0.121198	0.30702	0.394758	0.693022	0.883601
ENSG00000074356	55421	MIRT761169	hsa-mir-10b-5p	Homo sapiens	NCBP3	Homo sapiens	PAR-CLIP	Functional MTI (Weak)	27292025	NCBP3	17	3480.01	-0.0629688	0.105689	-0.595791	0.551315	0.737415	1976.39	-0.648145	0.182369	-3.55402	0.000379383	0.0139611
ENSG00000074706	26034	MIRT047416	hsa-mir-10b-5p	Homo sapiens	IPCEF1	Homo sapiens	CLASH	Functional MTI (Weak)	23622248	IPCEF1	6	25.6096	0.202081	0.44337	0.455785	0.648545	0.804294	NA	NA	NA	NA	NA	NA
ENSG00000075856	9733	MIRT732646	hsa-mir-10b-5p	Homo sapiens	SART3	Homo sapiens	Luciferase reporter assay	Functional MTI	26881967	SART3	12	7263.51	-0.19785	0.103866	-1.90486	0.0567984	0.162994	3537.79	-0.73666	0.175858	-4.18896	2.80239e-05	0.00234976
ENSG00000076641	55824	MIRT761157	hsa-mir-10b-3p	Homo sapiens	PAG1	Homo sapiens	PAR-CLIP	Functional MTI (Weak)	27292025	PAG1	8	1598.45	0.888643	0.124106	7.16036	8.04658e-13	3.4937e-11	981.356	-0.449032	0.158594	-2.83134	0.0046354	0.0666309
ENSG00000076770	55796	MIRT732649	hsa-mir-10b-5p	Homo sapiens	MBNL3	Homo sapiens	Luciferase reporter assay	Functional MTI	26881967	MBNL3	X	17313	0.153824	0.140873	1.09194	0.274861	0.486986	14031.9	-0.195152	0.222439	-0.877326	0.380309	0.698851
ENSG00000076826	57662	MIRT047421	hsa-mir-10b-5p	Homo sapiens	CAMSAP3	Homo sapiens	CLASH	Functional MTI (Weak)	23622248	CAMSAP3	19	1773.92	-0.0488273	0.20189	-0.241851	0.808896	0.90388	1240.42	0.0656244	0.296681	0.221195	0.82494	0.93811
ENSG00000077147	56889	MIRT574398	hsa-mir-10b-3p	Homo sapiens	TM9SF3	Homo sapiens	PAR-CLIP	Functional MTI (Weak)	20371350	TM9SF3	10	14600.6	0.362497	0.132863	2.72835	0.00636518	0.0305629	10397.6	-0.109943	0.210533	-0.522213	0.601522	0.837879
ENSG00000077713	203427	MIRT540950	hsa-mir-10b-5p	Homo sapiens	SLC25A43	Homo sapiens	PAR-CLIP	Functional MTI (Weak)	21572407	SLC25A43	X	694.143	0.322121	0.128395	2.50883	0.012113	0.0511186	1086.14	-0.0282247	0.167607	-0.168398	0.86627	0.950204
ENSG00000085788	23259	MIRT047446	hsa-mir-10b-5p	Homo sapiens	DDHD2	Homo sapiens	CLASH	Functional MTI (Weak)	23622248	DDHD2	8	4536.41	0.111258	0.108359	1.02675	0.304537	0.519328	3572.52	0.0283817	0.178601	0.158911	0.873739	0.953019
ENSG00000085840	4998	MIRT541935	hsa-mir-10b-5p	Homo sapiens	ORC1	Homo sapiens	HITS-CLIP	Functional MTI (Weak)	23313552	ORC1	1	3440.43	-0.337723	0.106111	-3.18274	0.0014589	0.00913546	1951.27	-0.0171139	0.166721	-0.10265	0.918241	0.968665
ENSG00000085840	4998	MIRT541935	hsa-mir-10b-5p	Homo sapiens	ORC1	Homo sapiens	PAR-CLIP	Functional MTI (Weak)	21572407	ORC1	1	3440.43	-0.337723	0.106111	-3.18274	0.0014589	0.00913546	1951.27	-0.0171139	0.166721	-0.10265	0.918241	0.968665
ENSG00000087301	57544	MIRT047403	hsa-mir-10b-5p	Homo sapiens	TXNDC16	Homo sapiens	CLASH	Functional MTI (Weak)	23622248	TXNDC16	14	645.597	-0.366346	0.153605	-2.38499	0.0170796	0.0664868	391.511	-0.261028	0.192749	-1.35424	0.175661	0.502227
ENSG00000087510	7022	MIRT006367	hsa-mir-10b-5p	Homo sapiens	TFAP2C	Homo sapiens	Luciferase reporter assay//Western blot	Functional MTI	21471404	TFAP2C	20	NA	NA	NA	NA	NA	NA	NA	NA	NA	NA	NA	NA
ENSG00000087510	7022	MIRT006367	hsa-mir-10b-5p	Homo sapiens	TFAP2C	Homo sapiens	PAR-CLIP	Functional MTI (Weak)	21572407	TFAP2C	20	NA	NA	NA	NA	NA	NA	NA	NA	NA	NA	NA	NA
ENSG00000088808	23368	MIRT047417	hsa-mir-10b-5p	Homo sapiens	PPP1R13B	Homo sapiens	CLASH	Functional MTI (Weak)	23622248	PPP1R13B	14	699.573	-0.433782	0.131181	-3.30675	0.000943836	0.0063129	473.636	-0.0247976	0.233043	-0.106408	0.915259	0.96759
ENSG00000088888	57506	MIRT661939	hsa-mir-10b-5p	Homo sapiens	MAVS	Homo sapiens	HITS-CLIP	Functional MTI (Weak)	23824327	MAVS	20	13787	0.107809	0.110194	0.97835	0.327901	0.543033	7104.29	-0.427191	0.242786	-1.75953	0.0784869	0.342761
ENSG00000089022	8550	MIRT514576	hsa-mir-10b-5p	Homo sapiens	MAPKAPK5	Homo sapiens	PAR-CLIP	Functional MTI (Weak)	23446348	MAPKAPK5	12	3179.66	-0.0856314	0.104378	-0.820395	0.411991	0.624464	4079.61	0.0475644	0.157826	0.301373	0.76313	0.911899
ENSG00000089022	8550	MIRT514576	hsa-mir-10b-5p	Homo sapiens	MAPKAPK5	Homo sapiens	PAR-CLIP	Functional MTI (Weak)	21572407	MAPKAPK5	12	3179.66	-0.0856314	0.104378	-0.820395	0.411991	0.624464	4079.61	0.0475644	0.157826	0.301373	0.76313	0.911899
ENSG00000091947	84336	MIRT549622	hsa-mir-10b-5p	Homo sapiens	TMEM101	Homo sapiens	PAR-CLIP	Functional MTI (Weak)	21572407	TMEM101	17	1133.18	-0.166182	0.14332	-1.15952	0.246246	0.453479	1436.64	0.51383	0.18295	2.80858	0.00497605	0.069558
ENSG00000094804	990	MIRT707713	hsa-mir-10b-5p	Homo sapiens	CDC6	Homo sapiens	HITS-CLIP	Functional MTI (Weak)	21572407	CDC6	17	9756.45	-0.263863	0.107872	-2.44607	0.0144423	0.0585149	5397.49	0.0403658	0.158834	0.254138	0.799389	0.928671
ENSG00000094975	51430	MIRT485062	hsa-mir-10b-3p	Homo sapiens	SUCO	Homo sapiens	PAR-CLIP	Functional MTI (Weak)	23592263	SUCO	1	4724	0.144467	0.142339	1.01495	0.31013	0.524866	3169.21	-0.453318	0.226923	-1.99768	0.0457517	0.257936
ENSG00000095539	57715	MIRT650851	hsa-mir-10b-3p	Homo sapiens	SEMA4G	Homo sapiens	HITS-CLIP	Functional MTI (Weak)	23824327	SEMA4G	10	7884.69	-0.0197974	0.117155	-0.168985	0.865809	0.934499	7231.17	0.23004	0.188819	1.21831	0.223107	0.556955
ENSG00000099875	2872	MIRT493172	hsa-mir-10b-5p	Homo sapiens	MKNK2	Homo sapiens	PAR-CLIP	Functional MTI (Weak)	23592263	MKNK2	19	2387.39	-0.220762	0.146453	-1.50739	0.131711	0.298726	3083.56	0.175419	0.27746	0.632231	0.527236	0.793945
ENSG00000100258	91289	MIRT047491	hsa-mir-10b-5p	Homo sapiens	LMF2	Homo sapiens	CLASH	Functional MTI (Weak)	23622248	LMF2	22	2243.26	-0.29966	0.344415	-0.870054	0.384271	0.597943	1332.27	0.594589	0.522729	1.13747	0.255342	0.588383
ENSG00000100350	80020	MIRT761167	hsa-mir-10b-5p	Homo sapiens	FOXRED2	Homo sapiens	PAR-CLIP	Functional MTI (Weak)	27292025	FOXRED2	22	1998.6	0.229209	0.111325	2.05891	0.0395027	0.1247	1581.95	0.0309978	0.139759	0.221796	0.824473	0.938064
ENSG00000100376	55007	MIRT707702	hsa-mir-10b-5p	Homo sapiens	FAM118A	Homo sapiens	HITS-CLIP	Functional MTI (Weak)	21572407	FAM118A	22	3156.94	-0.062059	0.10899	-0.569402	0.569084	0.750523	2885.86	0.235335	0.162524	1.448	0.147616	0.465951
ENSG00000100664	1983	MIRT477519	hsa-mir-10b-3p	Homo sapiens	EIF5	Homo sapiens	PAR-CLIP	Functional MTI (Weak)	23592263	EIF5	14	22948.6	0.257079	0.114449	2.24624	0.0246887	0.0881867	17976.2	-0.0572278	0.177356	-0.322672	0.746944	0.905367
ENSG00000100983	2937	MIRT532578	hsa-mir-10b-5p	Homo sapiens	GSS	Homo sapiens	PAR-CLIP	Functional MTI (Weak)	22012620	GSS	20	4829.6	-0.11487	0.105957	-1.08412	0.278311	0.491392	2849.64	0.219111	0.180766	1.21213	0.225464	0.559314
ENSG00000101266	1457	MIRT047431	hsa-mir-10b-5p	Homo sapiens	CSNK2A1	Homo sapiens	PAR-CLIP	Functional MTI (Weak)	22012620	CSNK2A1	20	8769.56	0.0119551	0.111894	0.106842	0.914914	0.959331	6179.66	-0.232228	0.169581	-1.36942	0.170867	0.494343
ENSG00000101266	1457	MIRT047431	hsa-mir-10b-5p	Homo sapiens	CSNK2A1	Homo sapiens	CLASH	Functional MTI (Weak)	23622248	CSNK2A1	20	8769.56	0.0119551	0.111894	0.106842	0.914914	0.959331	6179.66	-0.232228	0.169581	-1.36942	0.170867	0.494343
ENSG00000101367	22919	MIRT007026	hsa-mir-10b-5p	Homo sapiens	MAPRE1	Homo sapiens	Luciferase reporter assay	Functional MTI	21562367	MAPRE1	20	14194.7	-0.118735	0.106948	-1.11021	0.266909	0.477969	12606.4	0.116201	0.212237	0.547504	0.584032	0.828048
ENSG00000101444	191	MIRT705848	hsa-mir-10b-5p	Homo sapiens	AHCY	Homo sapiens	HITS-CLIP	Functional MTI (Weak)	23313552	AHCY	20	22571	0.0825519	0.117878	0.700319	0.483728	0.683028	14646.5	-0.200293	0.180894	-1.10724	0.268188	0.599002
ENSG00000101596	23347	MIRT047425	hsa-mir-10b-5p	Homo sapiens	SMCHD1	Homo sapiens	CLASH	Functional MTI (Weak)	23622248	SMCHD1	18	11379.3	0.290969	0.125473	2.31898	0.0203963	0.0760761	3825.92	-0.395069	0.214683	-1.84025	0.065732	0.311866
ENSG00000101892	23439	MIRT680483	hsa-mir-10b-5p	Homo sapiens	ATP1B4	Homo sapiens	HITS-CLIP	Functional MTI (Weak)	23824327	ATP1B4	X	NA	NA	NA	NA	NA	NA	NA	NA	NA	NA	NA	NA
ENSG00000101935	9949	MIRT038670	hsa-mir-10b-3p	Homo sapiens	AMMECR1	Homo sapiens	CLASH	Functional MTI (Weak)	23622248	AMMECR1	X	1330.67	-0.4524	0.138657	-3.26273	0.00110345	0.00723268	1158.34	-0.155647	0.190221	-0.818244	0.413218	0.72274
ENSG00000101940	64743	MIRT542507	hsa-mir-10b-5p	Homo sapiens	WDR13	Homo sapiens	PAR-CLIP	Functional MTI (Weak)	21572407	WDR13	X	1700.27	0.0174698	0.161949	0.107872	0.914097	0.958854	1834.35	0.543863	0.268033	2.02909	0.042449	0.247799
ENSG00000101966	331	MIRT697610	hsa-mir-10b-5p	Homo sapiens	XIAP	Homo sapiens	HITS-CLIP	Functional MTI (Weak)	23313552	XIAP	X	2019.78	0.30483	0.132342	2.30335	0.0212594	0.0785455	1142.19	-0.393211	0.220787	-1.78095	0.0749203	0.334885
ENSG00000103264	79791	MIRT714402	hsa-mir-10b-5p	Homo sapiens	FBXO31	Homo sapiens	HITS-CLIP	Functional MTI (Weak)	19536157	FBXO31	16	2341.75	-0.0863085	0.125986	-0.685064	0.493303	0.690602	1824.11	-0.0529788	0.172062	-0.307906	0.758154	0.909874
ENSG00000103335	9780	MIRT006294	hsa-mir-10b-5p	Homo sapiens	PIEZO1	Homo sapiens	Luciferase reporter assay	Functional MTI	22322955	PIEZO1	16	10142.6	-0.0962151	0.190091	-0.506153	0.612749	0.782597	3348.02	-0.0309862	0.597476	-0.0518618	0.958639	0.983812
ENSG00000103449	6299	MIRT534534	hsa-mir-10b-3p	Homo sapiens	SALL1	Homo sapiens	PAR-CLIP	Functional MTI (Weak)	22012620	SALL1	16	1297.56	-0.0471229	0.123045	-0.382972	0.701741	0.839456	1148.09	0.0808801	0.161251	0.50158	0.615963	0.843761
ENSG00000104332	6422	MIRT448050	hsa-mir-10b-5p	Homo sapiens	SFRP1	Homo sapiens	PAR-CLIP	Functional MTI (Weak)	22100165	SFRP1	8	NA	NA	NA	NA	NA	NA	NA	NA	NA	NA	NA	NA
ENSG00000104687	2936	MIRT650789	hsa-mir-10b-5p	Homo sapiens	GSR	Homo sapiens	HITS-CLIP	Functional MTI (Weak)	23824327	GSR	8	12229.4	0.142555	0.105197	1.35512	0.175379	0.364244	9991.77	-0.0432701	0.172458	-0.250902	0.80189	0.930165
ENSG00000104853	1209	MIRT047428	hsa-mir-10b-5p	Homo sapiens	CLPTM1	Homo sapiens	CLASH	Functional MTI (Weak)	23622248	CLPTM1	19	7329.09	0.0375509	0.118262	0.317523	0.750847	0.86927	5726.14	-0.504246	0.209962	-2.4016	0.0163234	0.144488
ENSG00000104903	4066	MIRT439123	hsa-mir-10b-5p	Homo sapiens	LYL1	Homo sapiens	3'LIFE	Functional MTI (Weak)	25074381	LYL1	19	35.1221	0.419047	0.370008	1.13254	0.257409	0.466277	46.3516	0.680111	0.587162	1.1583	0.246741	0.580443
ENSG00000104967	4858	MIRT655795	hsa-mir-10b-3p	Homo sapiens	NOVA2	Homo sapiens	HITS-CLIP	Functional MTI (Weak)	23824327	NOVA2	19	NA	NA	NA	NA	NA	NA	NA	NA	NA	NA	NA	NA
ENSG00000105197	92609	MIRT707092	hsa-mir-10b-5p	Homo sapiens	TIMM50	Homo sapiens	HITS-CLIP	Functional MTI (Weak)	21572407	TIMM50	19	4002.47	-0.0120819	0.117357	-0.10295	0.918003	0.960774	4040	0.0826145	0.153295	0.538927	0.589937	0.832326
ENSG00000105483	22900	MIRT683576	hsa-mir-10b-5p	Homo sapiens	CARD8	Homo sapiens	PAR-CLIP	Functional MTI (Weak)	27292025	CARD8	19	2986.56	0.144158	0.118427	1.21727	0.223503	0.42556	2575.49	0.0336489	0.138966	0.242138	0.808673	0.932045
ENSG00000105483	22900	MIRT683576	hsa-mir-10b-5p	Homo sapiens	CARD8	Homo sapiens	HITS-CLIP	Functional MTI (Weak)	23313552	CARD8	19	2986.56	0.144158	0.118427	1.21727	0.223503	0.42556	2575.49	0.0336489	0.138966	0.242138	0.808673	0.932045
ENSG00000105641	6528	MIRT686049	hsa-mir-10b-5p	Homo sapiens	SLC5A5	Homo sapiens	HITS-CLIP	Functional MTI (Weak)	23313552	SLC5A5	19	NA	NA	NA	NA	NA	NA	NA	NA	NA	NA	NA	NA
ENSG00000105732	64763	MIRT689204	hsa-mir-10b-5p	Homo sapiens	ZNF574	Homo sapiens	HITS-CLIP	Functional MTI (Weak)	23313552	ZNF574	19	1037.4	0.0842869	0.173208	0.486622	0.626526	0.791279	1281.28	0.299258	0.347488	0.861202	0.389127	0.705501
ENSG00000105784	154661	MIRT047438	hsa-mir-10b-5p	Homo sapiens	RUNDC3B	Homo sapiens	CLASH	Functional MTI (Weak)	23622248	RUNDC3B	7	43.0881	-0.195507	0.31666	-0.617403	0.536969	0.725803	NA	NA	NA	NA	NA	NA
ENSG00000106392	56913	MIRT688899	hsa-mir-10b-5p	Homo sapiens	C1GALT1	Homo sapiens	HITS-CLIP	Functional MTI (Weak)	23313552	C1GALT1	7	2661.25	0.411578	0.143322	2.8717	0.00408268	0.0213019	2348.21	-0.148254	0.214866	-0.689984	0.490204	0.772231
ENSG00000106608	55665	MIRT520269	hsa-mir-10b-5p	Homo sapiens	URGCP	Homo sapiens	PAR-CLIP	Functional MTI (Weak)	23446348	URGCP	7	534.593	0.149914	0.14916	1.00505	0.314872	0.529185	361.449	-0.324227	0.232838	-1.3925	0.163772	0.486846
ENSG00000106682	7458	MIRT537780	hsa-mir-10b-3p	Homo sapiens	EIF4H	Homo sapiens	PAR-CLIP	Functional MTI (Weak)	22012620	EIF4H	7	9605.22	-0.0973707	0.103249	-0.943068	0.345646	0.560226	8894.01	0.150995	0.156703	0.963575	0.335259	0.661011
ENSG00000106682	7458	MIRT537780	hsa-mir-10b-3p	Homo sapiens	EIF4H	Homo sapiens	PAR-CLIP	Functional MTI (Weak)	20371350	EIF4H	7	9605.22	-0.0973707	0.103249	-0.943068	0.345646	0.560226	8894.01	0.150995	0.156703	0.963575	0.335259	0.661011
ENSG00000106682	7458	MIRT537780	hsa-mir-10b-3p	Homo sapiens	EIF4H	Homo sapiens	PAR-CLIP	Functional MTI (Weak)	21572407	EIF4H	7	9605.22	-0.0973707	0.103249	-0.943068	0.345646	0.560226	8894.01	0.150995	0.156703	0.963575	0.335259	0.661011
ENSG00000107185	9827	MIRT047470	hsa-mir-10b-5p	Homo sapiens	RGP1	Homo sapiens	CLASH	Functional MTI (Weak)	23622248	RGP1	9	2487.86	0.0411378	0.130431	0.315399	0.752459	0.869872	2021.39	0.238713	0.212257	1.12464	0.260741	0.593164
ENSG00000107201	23586	MIRT437784	hsa-mir-10b-5p	Homo sapiens	DDX58	Homo sapiens	Luciferase reporter assay	Functional MTI	25312779	DDX58	9	302.825	-0.05256	0.17303	-0.303762	0.761309	0.874927	204.293	-0.28454	0.250051	-1.13793	0.255151	0.588375
ENSG00000107485	2625	MIRT057215	hsa-mir-10b-5p	Homo sapiens	GATA3	Homo sapiens	3'LIFE	Functional MTI (Weak)	25074381	GATA3	10	71.1307	0.190877	0.252841	0.75493	0.450291	0.656144	66.6601	0.167044	0.335358	0.498105	0.61841	0.844944
ENSG00000107566	10613	MIRT047443	hsa-mir-10b-5p	Homo sapiens	ERLIN1	Homo sapiens	CLASH	Functional MTI (Weak)	23622248	ERLIN1	10	6209.23	0.124192	0.120209	1.03314	0.30154	0.515795	5339.52	-0.173698	0.18828	-0.92255	0.356242	0.677565
ENSG00000107758	5532	MIRT047460	hsa-mir-10b-5p	Homo sapiens	PPP3CB	Homo sapiens	CLASH	Functional MTI (Weak)	23622248	PPP3CB	10	2433.57	-0.208129	0.134284	-1.54991	0.121162	0.281928	2959.39	-0.159144	0.157745	-1.00887	0.313037	0.643263
ENSG00000108256	57532	MIRT047504	hsa-mir-10b-5p	Homo sapiens	NUFIP2	Homo sapiens	CLASH	Functional MTI (Weak)	23622248	NUFIP2	17	16597.6	-0.101092	0.114766	-0.88086	0.378394	0.592372	16636.5	-0.370683	0.183585	-2.01913	0.0434732	0.251023
ENSG00000108671	5717	MIRT047502	hsa-mir-10b-5p	Homo sapiens	PSMD11	Homo sapiens	CLASH	Functional MTI (Weak)	23622248	PSMD11	17	18730.5	-0.497334	0.101132	-4.91768	8.75752e-07	1.42716e-05	12490.8	-0.193507	0.199074	-0.972034	0.331034	0.65686
ENSG00000108829	55379	MIRT047442	hsa-mir-10b-5p	Homo sapiens	LRRC59	Homo sapiens	CLASH	Functional MTI (Weak)	23622248	LRRC59	17	12579.5	-0.2505	0.0995688	-2.51585	0.0118747	0.0502397	9205.65	0.168889	0.212692	0.794056	0.427163	0.732639
ENSG00000108953	7531	MIRT533082	hsa-mir-10b-3p	Homo sapiens	YWHAE	Homo sapiens	PAR-CLIP	Functional MTI (Weak)	22012620	YWHAE	17	22014.6	-0.309438	0.105503	-2.93299	0.00335712	0.0181237	22605.2	-0.0564116	0.200553	-0.28128	0.778495	0.920349
ENSG00000109654	23321	MIRT309534	hsa-mir-10b-5p	Homo sapiens	TRIM2	Homo sapiens	PAR-CLIP	Functional MTI (Weak)	20371350	TRIM2	4	2864.52	-1.06965	0.130668	-8.18606	2.69921e-16	1.69193e-14	1989.57	-0.22281	0.219466	-1.01524	0.309993	0.641645
ENSG00000109654	23321	MIRT309534	hsa-mir-10b-5p	Homo sapiens	TRIM2	Homo sapiens	PAR-CLIP	Functional MTI (Weak)	21572407	TRIM2	4	2864.52	-1.06965	0.130668	-8.18606	2.69921e-16	1.69193e-14	1989.57	-0.22281	0.219466	-1.01524	0.309993	0.641645
ENSG00000109756	9693	MIRT093336	hsa-mir-10b-5p	Homo sapiens	RAPGEF2	Homo sapiens	PAR-CLIP	Functional MTI (Weak)	20371350	RAPGEF2	4	4202.62	-0.0499483	0.130929	-0.381492	0.702838	0.840078	1458.55	-0.422419	0.196526	-2.14943	0.0316006	0.21019
ENSG00000109814	7358	MIRT530222	hsa-mir-10b-5p	Homo sapiens	UGDH	Homo sapiens	PAR-CLIP	Functional MTI (Weak)	22012620	UGDH	4	10308.4	0.902248	0.115684	7.79925	6.22739e-15	3.45535e-13	7158.11	-0.492273	0.156218	-3.15119	0.00162607	0.03588
ENSG00000109854	10553	MIRT437374	hsa-mir-10b-5p	Homo sapiens	HTATIP2	Homo sapiens	Luciferase reporter assay//qRT-PCR//Western blot	Functional MTI	24096486	HTATIP2	11	6498.91	0.433706	0.110645	3.91981	8.86196e-05	0.000852586	9032.92	0.0664831	0.193191	0.344132	0.730747	0.898896
ENSG00000110108	79073	MIRT652516	hsa-mir-10b-5p	Homo sapiens	TMEM109	Homo sapiens	HITS-CLIP	Functional MTI (Weak)	23824327	TMEM109	11	11167.1	-0.0633177	0.11455	-0.552752	0.580434	0.759584	9717.46	0.346168	0.151031	2.29203	0.021904	0.171404
ENSG00000110245	345	MIRT696689	hsa-mir-10b-5p	Homo sapiens	APOC3	Homo sapiens	HITS-CLIP	Functional MTI (Weak)	23313552	APOC3	11	1784.33	0.473691	0.160634	2.94888	0.00318925	0.017349	5562.5	0.339032	0.267822	1.26589	0.205554	0.539729
ENSG00000110841	8496	MIRT707458	hsa-mir-10b-5p	Homo sapiens	PPFIBP1	Homo sapiens	HITS-CLIP	Functional MTI (Weak)	21572407	PPFIBP1	12	3569.27	-0.145372	0.117644	-1.2357	0.216571	0.416947	1280.68	-0.554388	0.20804	-2.66481	0.00770316	0.0925918
ENSG00000110911	4891	MIRT635874	hsa-mir-10b-5p	Homo sapiens	SLC11A2	Homo sapiens	HITS-CLIP	Functional MTI (Weak)	23824327	SLC11A2	12	3218.36	-0.0866477	0.118033	-0.734097	0.462889	0.66619	2473.87	0.0320894	0.199032	0.161227	0.871914	0.952504
ENSG00000111049	4617	MIRT439121	hsa-mir-10b-5p	Homo sapiens	MYF5	Homo sapiens	3'LIFE	Functional MTI (Weak)	25074381	MYF5	12	NA	NA	NA	NA	NA	NA	NA	NA	NA	NA	NA	NA
ENSG00000112304	55856	MIRT689916	hsa-mir-10b-5p	Homo sapiens	ACOT13	Homo sapiens	HITS-CLIP	Functional MTI (Weak)	23313552	ACOT13	6	2326.02	-0.147619	0.116003	-1.27254	0.20318	0.400173	3197.62	0.20891	0.167276	1.2489	0.211702	0.547252
ENSG00000113300	57472	MIRT513974	hsa-mir-10b-5p	Homo sapiens	CNOT6	Homo sapiens	PAR-CLIP	Functional MTI (Weak)	23446348	CNOT6	5	6305.18	0.162032	0.115499	1.40289	0.160649	0.342747	6117.18	-0.0139531	0.174965	-0.0797483	0.936437	0.97579
ENSG00000113328	900	MIRT669167	hsa-mir-10b-5p	Homo sapiens	CCNG1	Homo sapiens	HITS-CLIP	Functional MTI (Weak)	23824327	CCNG1	5	9523.1	0.413268	0.136596	3.02548	0.00248242	0.0141327	15221.5	0.0324614	0.205565	0.157913	0.874526	0.953207
ENSG00000113368	4001	MIRT311421	hsa-mir-10b-3p	Homo sapiens	LMNB1	Homo sapiens	PAR-CLIP	Functional MTI (Weak)	20371350	LMNB1	5	7329.26	-0.179791	0.105089	-1.71084	0.0871107	0.223166	2016.37	-0.14476	0.206651	-0.700507	0.483611	0.767289
ENSG00000114520	8723	MIRT554083	hsa-mir-10b-5p	Homo sapiens	SNX4	Homo sapiens	PAR-CLIP	Functional MTI (Weak)	20371350	SNX4	3	2625.54	-0.0288713	0.121696	-0.237241	0.81247	0.906	2708.63	-0.180989	0.156736	-1.15474	0.248197	0.582
ENSG00000114520	8723	MIRT554083	hsa-mir-10b-5p	Homo sapiens	SNX4	Homo sapiens	PAR-CLIP	Functional MTI (Weak)	21572407	SNX4	3	2625.54	-0.0288713	0.121696	-0.237241	0.81247	0.906	2708.63	-0.180989	0.156736	-1.15474	0.248197	0.582
ENSG00000115137	51277	MIRT496982	hsa-mir-10b-3p	Homo sapiens	DNAJC27	Homo sapiens	PAR-CLIP	Functional MTI (Weak)	22291592	DNAJC27	2	172.01	0.194544	0.190235	1.02265	0.306474	0.521366	269.247	-0.105781	0.289671	-0.365175	0.714981	0.893161
ENSG00000115641	2274	MIRT523699	hsa-mir-10b-5p	Homo sapiens	FHL2	Homo sapiens	PAR-CLIP	Functional MTI (Weak)	23446348	FHL2	2	72.1069	-0.77135	0.300009	-2.57109	0.0101378	0.0443602	70.8855	-0.135239	0.573955	-0.235626	0.813723	0.934494
ENSG00000115641	2274	MIRT523699	hsa-mir-10b-5p	Homo sapiens	FHL2	Homo sapiens	PAR-CLIP	Functional MTI (Weak)	21572407	FHL2	2	72.1069	-0.77135	0.300009	-2.57109	0.0101378	0.0443602	70.8855	-0.135239	0.573955	-0.235626	0.813723	0.934494
ENSG00000115828	25797	MIRT761171	hsa-mir-10b-5p	Homo sapiens	QPCT	Homo sapiens	PAR-CLIP	Functional MTI (Weak)	27292025	QPCT	2	40.5977	1.61289	0.376891	4.27945	1.87359e-05	0.000217238	NA	NA	NA	NA	NA	NA
ENSG00000115884	6382	MIRT007072	hsa-mir-10b-5p	Homo sapiens	SDC1	Homo sapiens	3'LIFE	Functional MTI (Weak)	25074381	SDC1	2	5596.6	0.328601	0.140093	2.34559	0.018997	0.0721063	4193.64	0.267885	0.235025	1.13981	0.254364	0.587304
ENSG00000115884	6382	MIRT007072	hsa-mir-10b-5p	Homo sapiens	SDC1	Homo sapiens	Luciferase reporter assay	Functional MTI	22573479	SDC1	2	5596.6	0.328601	0.140093	2.34559	0.018997	0.0721063	4193.64	0.267885	0.235025	1.13981	0.254364	0.587304
ENSG00000115884	6382	MIRT007072	hsa-mir-10b-5p	Homo sapiens	SDC1	Homo sapiens	Luciferase reporter assay	Functional MTI	23206733	SDC1	2	5596.6	0.328601	0.140093	2.34559	0.018997	0.0721063	4193.64	0.267885	0.235025	1.13981	0.254364	0.587304
ENSG00000116106	2043	MIRT047479	hsa-mir-10b-5p	Homo sapiens	EPHA4	Homo sapiens	CLASH	Functional MTI (Weak)	23622248	EPHA4	2	NA	NA	NA	NA	NA	NA	NA	NA	NA	NA	NA	NA
ENSG00000116205	127428	MIRT652793	hsa-mir-10b-3p	Homo sapiens	TCEANC2	Homo sapiens	HITS-CLIP	Functional MTI (Weak)	23824327	TCEANC2	1	1128.37	-0.312569	0.160309	-1.94979	0.0512015	0.151672	901.32	-0.344499	0.287063	-1.20008	0.230108	0.564224
ENSG00000116455	79084	MIRT696629	hsa-mir-10b-5p	Homo sapiens	WDR77	Homo sapiens	HITS-CLIP	Functional MTI (Weak)	23313552	WDR77	1	3511.95	-0.437632	0.110762	-3.95109	7.77952e-05	0.000766106	2910.02	0.264165	0.216544	1.21992	0.222496	0.556511
ENSG00000117395	10969	MIRT515043	hsa-mir-10b-5p	Homo sapiens	EBNA1BP2	Homo sapiens	PAR-CLIP	Functional MTI (Weak)	23446348	EBNA1BP2	1	5128.82	-0.21201	0.111069	-1.90881	0.0562869	0.162032	5387.19	0.274894	0.225168	1.22084	0.222147	0.556272
ENSG00000117500	50999	MIRT466174	hsa-mir-10b-5p	Homo sapiens	TMED5	Homo sapiens	PAR-CLIP	Functional MTI (Weak)	23592263	TMED5	1	10056	0.20982	0.146878	1.42853	0.15314	0.332612	8788.63	-0.029282	0.238291	-0.122883	0.902199	0.963112
ENSG00000117523	23215	MIRT047500	hsa-mir-10b-5p	Homo sapiens	PRRC2C	Homo sapiens	CLASH	Functional MTI (Weak)	23622248	PRRC2C	1	24531.1	-0.280299	0.126	-2.22459	0.0261089	0.0918225	4677.34	-0.662413	0.249233	-2.65781	0.00786512	0.0930879
ENSG00000118257	8828	MIRT025587	hsa-mir-10b-5p	Homo sapiens	NRP2	Homo sapiens	Reporter assay	Non-Functional MTI	21642433	NRP2	2	487.973	-1.43972	0.179994	-7.99872	1.2572e-15	7.44832e-14	189.555	0.122959	0.321515	0.382436	0.702138	0.887373
ENSG00000118260	1385	MIRT735229	hsa-mir-10b-5p	Homo sapiens	CREB1	Homo sapiens	Luciferase reporter assay	Functional MTI	26796749	CREB1	2	2550.75	0.0766264	0.129831	0.590202	0.555055	0.740584	2269.69	-0.17205	0.174168	-0.98784	0.323231	0.651784
ENSG00000118733	118427	MIRT439119	hsa-mir-10b-5p	Homo sapiens	OLFM3	Homo sapiens	3'LIFE	Functional MTI (Weak)	25074381	OLFM3	1	1195.73	1.12176	0.123804	9.06076	1.29549e-19	1.09142e-17	2133.99	-0.154727	0.17043	-0.907861	0.363952	0.682934
ENSG00000119508	8013	MIRT025586	hsa-mir-10b-5p	Homo sapiens	NR4A3	Homo sapiens	Reporter assay	Non-Functional MTI	21642433	NR4A3	9	50.9166	0.747034	0.30634	2.43858	0.0147452	0.0594406	58.4725	0.695739	0.397738	1.74924	0.0802493	0.34678
ENSG00000119878	9419	MIRT707646	hsa-mir-10b-5p	Homo sapiens	CRIPT	Homo sapiens	HITS-CLIP	Functional MTI (Weak)	21572407	CRIPT	2	431.66	0.122407	0.161458	0.75814	0.448367	0.654379	610.338	0.206204	0.291191	0.708138	0.47886	0.763797
ENSG00000120029	79591	MIRT483515	hsa-mir-10b-3p	Homo sapiens	C10orf76	Homo sapiens	PAR-CLIP	Functional MTI (Weak)	23592263	NA	NA	1797.43	0.292041	0.118883	2.45653	0.0140285	0.0573316	1230.13	-0.270461	0.17102	-1.58146	0.113773	0.411194
ENSG00000120093	3213	MIRT506958	hsa-mir-10b-5p	Homo sapiens	HOXB3	Homo sapiens	Luciferase reporter assay//qRT-PCR//Western blot	Functional MTI	27447302	HOXB3	17	NA	NA	NA	NA	NA	NA	NA	NA	NA	NA	NA	NA
ENSG00000120093	3213	MIRT506958	hsa-mir-10b-5p	Homo sapiens	HOXB3	Homo sapiens	PAR-CLIP	Functional MTI (Weak)	23446348	HOXB3	17	NA	NA	NA	NA	NA	NA	NA	NA	NA	NA	NA	NA
ENSG00000120093	3213	MIRT506958	hsa-mir-10b-5p	Homo sapiens	HOXB3	Homo sapiens	PAR-CLIP	Functional MTI (Weak)	21572407	HOXB3	17	NA	NA	NA	NA	NA	NA	NA	NA	NA	NA	NA	NA
ENSG00000120289	4115	MIRT645028	hsa-mir-10b-3p	Homo sapiens	MAGEB4	Homo sapiens	HITS-CLIP	Functional MTI (Weak)	23824327	MAGEB4	X	NA	NA	NA	NA	NA	NA	NA	NA	NA	NA	NA	NA
ENSG00000120333	63931	MIRT708034	hsa-mir-10b-5p	Homo sapiens	MRPS14	Homo sapiens	HITS-CLIP	Functional MTI (Weak)	21572407	MRPS14	1	1666.54	-0.386076	0.123529	-3.12539	0.0017757	0.0107238	2401.11	0.185341	0.201265	0.92088	0.357113	0.678475
ENSG00000120334	91687	MIRT693631	hsa-mir-10b-5p	Homo sapiens	CENPL	Homo sapiens	HITS-CLIP	Functional MTI (Weak)	23313552	CENPL	1	775.482	-0.336832	0.127849	-2.63462	0.00842322	0.0383397	1035.55	0.00901831	0.175388	0.0514192	0.958991	0.98403
ENSG00000121022	10987	MIRT047407	hsa-mir-10b-5p	Homo sapiens	COPS5	Homo sapiens	CLASH	Functional MTI (Weak)	23622248	COPS5	8	3856.34	0.023467	0.107404	0.218493	0.827045	0.914386	4390.46	0.171308	0.156153	1.09705	0.272619	0.602795
ENSG00000121481	6045	MIRT619338	hsa-mir-10b-5p	Homo sapiens	RNF2	Homo sapiens	HITS-CLIP	Functional MTI (Weak)	23824327	RNF2	1	1267.24	0.14702	0.126561	1.16165	0.245378	0.452425	1425.18	-0.104387	0.162605	-0.641968	0.520894	0.790368
ENSG00000121671	1408	MIRT708939	hsa-mir-10b-5p	Homo sapiens	CRY2	Homo sapiens	HITS-CLIP	Functional MTI (Weak)	19536157	CRY2	11	1741.32	-0.368605	0.117873	-3.12713	0.00176519	0.0106713	1724.2	-0.235598	0.167383	-1.40754	0.159267	0.481467
ENSG00000121879	5290	MIRT734680	hsa-mir-10b-5p	Homo sapiens	PIK3CA	Homo sapiens	Luciferase reporter assay//Western blot	Functional MTI	25896413	PIK3CA	3	1312.58	0.297913	0.129676	2.29736	0.021598	0.0794292	832.861	-0.470668	0.195498	-2.40753	0.0160607	0.143175
ENSG00000121989	92	MIRT568634	hsa-mir-10b-5p	Homo sapiens	ACVR2A	Homo sapiens	PAR-CLIP	Functional MTI (Weak)	20371350	ACVR2A	2	1457.86	0.0414675	0.124872	0.332081	0.739828	0.862296	1268.95	0.111019	0.150727	0.736557	0.461392	0.754397
ENSG00000122641	3624	MIRT047412	hsa-mir-10b-5p	Homo sapiens	INHBA	Homo sapiens	CLASH	Functional MTI (Weak)	23622248	INHBA	7	109.899	0.509451	0.266741	1.90991	0.0561449	0.161815	92.4832	-0.0580112	0.424746	-0.136579	0.891364	0.959184
ENSG00000123374	1017	MIRT047445	hsa-mir-10b-5p	Homo sapiens	CDK2	Homo sapiens	CLASH	Functional MTI (Weak)	23622248	CDK2	12	4495.8	-0.115785	0.109683	-1.05564	0.291134	0.504961	4086.78	0.68785	0.228447	3.01099	0.00260398	0.0469004
ENSG00000123416	10376	MIRT047458	hsa-mir-10b-5p	Homo sapiens	TUBA1B	Homo sapiens	CLASH	Functional MTI (Weak)	23622248	TUBA1B	12	77682.9	0.0779709	0.106861	0.729646	0.465606	0.668282	71055.4	0.949832	0.27181	3.49447	0.000475003	0.0162264
ENSG00000123908	27161	MIRT761153	hsa-mir-10b-3p	Homo sapiens	AGO2	Homo sapiens	PAR-CLIP	Functional MTI (Weak)	27292025	AGO2	8	3138.5	-0.214785	0.131287	-1.636	0.10184	0.248987	1240.5	-0.165618	0.233642	-0.708852	0.478416	0.763651
ENSG00000124486	8239	MIRT520246	hsa-mir-10b-5p	Homo sapiens	USP9X	Homo sapiens	PAR-CLIP	Functional MTI (Weak)	21572407	USP9X	X	11374.5	0.464242	0.110876	4.18705	2.82604e-05	0.000315328	2845.2	-0.473963	0.175809	-2.6959	0.00701984	0.0871809
ENSG00000124486	8239	MIRT520246	hsa-mir-10b-5p	Homo sapiens	USP9X	Homo sapiens	PAR-CLIP	Functional MTI (Weak)	27292025	USP9X	X	11374.5	0.464242	0.110876	4.18705	2.82604e-05	0.000315328	2845.2	-0.473963	0.175809	-2.6959	0.00701984	0.0871809
ENSG00000124486	8239	MIRT520246	hsa-mir-10b-5p	Homo sapiens	USP9X	Homo sapiens	PAR-CLIP	Functional MTI (Weak)	23446348	USP9X	X	11374.5	0.464242	0.110876	4.18705	2.82604e-05	0.000315328	2845.2	-0.473963	0.175809	-2.6959	0.00701984	0.0871809
ENSG00000124762	1026	MIRT006369	hsa-mir-10b-5p	Homo sapiens	CDKN1A	Homo sapiens	Luciferase reporter assay//Western blot	Functional MTI	21471404	CDKN1A	6	138.408	0.112447	0.22286	0.504564	0.613865	0.782988	178.063	0.41261	0.25991	1.58751	0.112396	0.408138
ENSG00000125459	55154	MIRT047477	hsa-mir-10b-5p	Homo sapiens	MSTO1	Homo sapiens	CLASH	Functional MTI (Weak)	23622248	MSTO1	1	873.003	-0.326721	0.120007	-2.7225	0.00647895	0.0309876	773.426	0.136093	0.183977	0.73973	0.459464	0.752925
ENSG00000125637	23550	MIRT761170	hsa-mir-10b-5p	Homo sapiens	PSD4	Homo sapiens	PAR-CLIP	Functional MTI (Weak)	27292025	PSD4	2	126.99	-3.30157	0.263154	-12.5462	4.17198e-36	1.03544e-33	121.311	0.113875	0.426031	0.267293	0.789244	0.924572
ENSG00000125741	80207	MIRT724451	hsa-mir-10b-5p	Homo sapiens	OPA3	Homo sapiens	HITS-CLIP	Functional MTI (Weak)	19536157	OPA3	19	2648.13	0.316669	0.106975	2.96021	0.00307427	0.0168292	2111.81	-0.353737	0.241446	-1.46508	0.1429	0.459987
ENSG00000125772	56261	MIRT507099	hsa-mir-10b-5p	Homo sapiens	GPCPD1	Homo sapiens	PAR-CLIP	Functional MTI (Weak)	23446348	GPCPD1	20	2191.35	0.308459	0.142275	2.16804	0.0301554	0.101921	2093.48	-0.171177	0.158747	-1.0783	0.2809	0.613127
ENSG00000125878	6939	MIRT439115	hsa-mir-10b-5p	Homo sapiens	TCF15	Homo sapiens	HITS-CLIP	Functional MTI (Weak)	23824327	TCF15	20	NA	NA	NA	NA	NA	NA	NA	NA	NA	NA	NA	NA
ENSG00000125878	6939	MIRT439115	hsa-mir-10b-5p	Homo sapiens	TCF15	Homo sapiens	3'LIFE	Functional MTI (Weak)	25074381	TCF15	20	NA	NA	NA	NA	NA	NA	NA	NA	NA	NA	NA	NA
ENSG00000126088	7389	MIRT047424	hsa-mir-10b-5p	Homo sapiens	UROD	Homo sapiens	CLASH	Functional MTI (Weak)	23622248	UROD	1	4201.97	0.16259	0.113829	1.42837	0.153186	0.332672	4566.43	0.168642	0.154405	1.09221	0.274743	0.605582
ENSG00000128050	10606	MIRT542373	hsa-mir-10b-5p	Homo sapiens	PAICS	Homo sapiens	PAR-CLIP	Functional MTI (Weak)	21572407	PAICS	4	24454.7	-0.162909	0.116953	-1.39294	0.163638	0.346601	12954.2	-0.39257	0.17554	-2.23635	0.0253286	0.184821
ENSG00000128645	3231	MIRT439124	hsa-mir-10b-5p	Homo sapiens	HOXD1	Homo sapiens	3'LIFE	Functional MTI (Weak)	25074381	HOXD1	2	424.607	-3.14802	0.176211	-17.8651	2.20722e-71	1.93037e-68	460.545	0.328373	0.230052	1.42739	0.153469	0.474149
ENSG00000128708	8520	MIRT299418	hsa-mir-10b-3p	Homo sapiens	HAT1	Homo sapiens	PAR-CLIP	Functional MTI (Weak)	23592263	HAT1	2	6143.26	-0.0264804	0.110911	-0.238754	0.811296	0.905335	4783.9	-0.480203	0.183002	-2.62403	0.00868956	0.100017
ENSG00000128710	3236	MIRT002021	hsa-mir-10b-5p	Homo sapiens	HOXD10	Homo sapiens	Immunohistochemistry//In situ hybridization//Luciferase reporter assay//qRT-PCR//Western blot	Functional MTI	22293682	HOXD10	2	NA	NA	NA	NA	NA	NA	NA	NA	NA	NA	NA	NA
ENSG00000128710	3236	MIRT002021	hsa-mir-10b-5p	Homo sapiens	HOXD10	Homo sapiens	Immunohistochemistry	Functional MTI (Weak)	24897960	HOXD10	2	NA	NA	NA	NA	NA	NA	NA	NA	NA	NA	NA	NA
ENSG00000128710	3236	MIRT002021	hsa-mir-10b-5p	Homo sapiens	HOXD10	Homo sapiens	Luciferase reporter assay//Western blot//Reporter assay	Functional MTI	17898713	HOXD10	2	NA	NA	NA	NA	NA	NA	NA	NA	NA	NA	NA	NA
ENSG00000128710	3236	MIRT002021	hsa-mir-10b-5p	Homo sapiens	HOXD10	Homo sapiens	3'LIFE	Functional MTI (Weak)	25074381	HOXD10	2	NA	NA	NA	NA	NA	NA	NA	NA	NA	NA	NA	NA
ENSG00000128710	3236	MIRT002021	hsa-mir-10b-5p	Homo sapiens	HOXD10	Homo sapiens	Luciferase reporter assay	Functional MTI	23034333	HOXD10	2	NA	NA	NA	NA	NA	NA	NA	NA	NA	NA	NA	NA
ENSG00000128710	3236	MIRT002021	hsa-mir-10b-5p	Homo sapiens	HOXD10	Homo sapiens	Immunohistochemistry//qRT-PCR//Western blot	Functional MTI	26311318	HOXD10	2	NA	NA	NA	NA	NA	NA	NA	NA	NA	NA	NA	NA
ENSG00000128710	3236	MIRT002021	hsa-mir-10b-5p	Homo sapiens	HOXD10	Homo sapiens	Reporter assay	Functional MTI	21642433	HOXD10	2	NA	NA	NA	NA	NA	NA	NA	NA	NA	NA	NA	NA
ENSG00000128710	3236	MIRT002021	hsa-mir-10b-5p	Homo sapiens	HOXD10	Homo sapiens	Luciferase reporter assay//Western blot	Functional MTI	21419107	HOXD10	2	NA	NA	NA	NA	NA	NA	NA	NA	NA	NA	NA	NA
ENSG00000128710	3236	MIRT002021	hsa-mir-10b-5p	Homo sapiens	HOXD10	Homo sapiens	Luciferase reporter assay//qRT-PCR//Western blot	Functional MTI	24573354	HOXD10	2	NA	NA	NA	NA	NA	NA	NA	NA	NA	NA	NA	NA
ENSG00000128710	3236	MIRT002021	hsa-mir-10b-5p	Homo sapiens	HOXD10	Homo sapiens	Western blot	Functional MTI	22766763	HOXD10	2	NA	NA	NA	NA	NA	NA	NA	NA	NA	NA	NA	NA
ENSG00000128710	3236	MIRT002021	hsa-mir-10b-5p	Homo sapiens	HOXD10	Homo sapiens	Luciferase reporter assay//Immunocytochemistry//Western blot	Functional MTI	24376640	HOXD10	2	NA	NA	NA	NA	NA	NA	NA	NA	NA	NA	NA	NA
ENSG00000128713	3237	MIRT439125	hsa-mir-10b-5p	Homo sapiens	HOXD11	Homo sapiens	3'LIFE	Functional MTI (Weak)	25074381	HOXD11	2	NA	NA	NA	NA	NA	NA	NA	NA	NA	NA	NA	NA
ENSG00000128989	10776	MIRT524848	hsa-mir-10b-3p	Homo sapiens	ARPP19	Homo sapiens	PAR-CLIP	Functional MTI (Weak)	23446348	ARPP19	15	7811.49	0.0641562	0.122225	0.524902	0.599651	0.77291	10894.5	0.0320515	0.200263	0.160046	0.872844	0.952909
ENSG00000129204	9098	MIRT439114	hsa-mir-10b-5p	Homo sapiens	USP6	Homo sapiens	3'LIFE	Functional MTI (Weak)	25074381	USP6	17	NA	NA	NA	NA	NA	NA	NA	NA	NA	NA	NA	NA
ENSG00000129245	9513	MIRT439129	hsa-mir-10b-5p	Homo sapiens	FXR2	Homo sapiens	3'LIFE	Functional MTI (Weak)	25074381	FXR2	17	2241.03	-0.140203	0.107951	-1.29876	0.194026	0.387926	1108.89	-0.173753	0.204502	-0.849639	0.395526	0.710478
ENSG00000130227	23039	MIRT047422	hsa-mir-10b-5p	Homo sapiens	XPO7	Homo sapiens	CLASH	Functional MTI (Weak)	23622248	XPO7	8	6895.2	-0.0883697	0.125302	-0.705254	0.480652	0.680788	5313.27	-0.0873053	0.138637	-0.629742	0.528863	0.795407
ENSG00000130413	65975	MIRT047404	hsa-mir-10b-5p	Homo sapiens	STK33	Homo sapiens	CLASH	Functional MTI (Weak)	23622248	STK33	11	NA	NA	NA	NA	NA	NA	NA	NA	NA	NA	NA	NA
ENSG00000130669	10298	MIRT761158	hsa-mir-10b-3p	Homo sapiens	PAK4	Homo sapiens	PAR-CLIP	Functional MTI (Weak)	27292025	PAK4	19	2023.3	-0.199676	0.176064	-1.13411	0.256748	0.465409	2391.81	0.0964141	0.30378	0.317382	0.750954	0.906663
ENSG00000130713	23404	MIRT692930	hsa-mir-10b-5p	Homo sapiens	EXOSC2	Homo sapiens	HITS-CLIP	Functional MTI (Weak)	23313552	EXOSC2	9	4808.55	-0.339271	0.102526	-3.30914	0.000935837	0.00627055	4734.72	0.148947	0.229866	0.647974	0.517002	0.788472
ENSG00000130881	4037	MIRT047486	hsa-mir-10b-5p	Homo sapiens	LRP3	Homo sapiens	CLASH	Functional MTI (Weak)	23622248	LRP3	19	1944.17	-0.251833	0.388939	-0.647488	0.517316	0.710251	3940.93	0.664036	0.657899	1.00933	0.312818	0.643257
ENSG00000131042	10288	MIRT625626	hsa-mir-10b-3p	Homo sapiens	LILRB2	Homo sapiens	HITS-CLIP	Functional MTI (Weak)	23824327	LILRB2	19	NA	NA	NA	NA	NA	NA	NA	NA	NA	NA	NA	NA
ENSG00000131473	47	MIRT047450	hsa-mir-10b-5p	Homo sapiens	ACLY	Homo sapiens	CLASH	Functional MTI (Weak)	23622248	ACLY	17	48019.6	-0.100448	0.0998054	-1.00644	0.314206	0.528694	12435.2	-0.0610099	0.224743	-0.271465	0.786033	0.924088
ENSG00000132005	5989	MIRT641581	hsa-mir-10b-3p	Homo sapiens	RFX1	Homo sapiens	HITS-CLIP	Functional MTI (Weak)	23824327	RFX1	19	341.371	-0.573596	0.199611	-2.87358	0.00405851	0.0212059	187.858	0.485228	0.355226	1.36597	0.171948	0.496432
ENSG00000132475	3021	MIRT475918	hsa-mir-10b-5p	Homo sapiens	H3F3B	Homo sapiens	PAR-CLIP	Functional MTI (Weak)	21572407	NA	NA	17541	-0.148735	0.0995879	-1.4935	0.135305	0.304648	24262.2	0.414366	0.147392	2.81132	0.00493394	0.069371
ENSG00000132475	3021	MIRT475918	hsa-mir-10b-5p	Homo sapiens	H3F3B	Homo sapiens	PAR-CLIP	Functional MTI (Weak)	23446348	NA	NA	17541	-0.148735	0.0995879	-1.4935	0.135305	0.304648	24262.2	0.414366	0.147392	2.81132	0.00493394	0.069371
ENSG00000132475	3021	MIRT475918	hsa-mir-10b-5p	Homo sapiens	H3F3B	Homo sapiens	PAR-CLIP	Functional MTI (Weak)	23592263	NA	NA	17541	-0.148735	0.0995879	-1.4935	0.135305	0.304648	24262.2	0.414366	0.147392	2.81132	0.00493394	0.069371
ENSG00000132475	3021	MIRT475918	hsa-mir-10b-5p	Homo sapiens	H3F3B	Homo sapiens	PAR-CLIP	Functional MTI (Weak)	20371350	NA	NA	17541	-0.148735	0.0995879	-1.4935	0.135305	0.304648	24262.2	0.414366	0.147392	2.81132	0.00493394	0.069371
ENSG00000132600	54496	MIRT047476	hsa-mir-10b-5p	Homo sapiens	PRMT7	Homo sapiens	CLASH	Functional MTI (Weak)	23622248	PRMT7	16	1789.16	-0.295538	0.131413	-2.24893	0.0245169	0.0877832	818.857	0.259325	0.171858	1.50895	0.131312	0.442759
ENSG00000132718	23208	MIRT047413	hsa-mir-10b-5p	Homo sapiens	SYT11	Homo sapiens	CLASH	Functional MTI (Weak)	23622248	SYT11	1	215.961	0.42146	0.215102	1.95935	0.0500714	0.14907	98.1142	-0.674821	0.441192	-1.52954	0.126131	0.432749
ENSG00000132793	64900	MIRT761168	hsa-mir-10b-5p	Homo sapiens	LPIN3	Homo sapiens	PAR-CLIP	Functional MTI (Weak)	27292025	LPIN3	20	791.825	0.334218	0.182066	1.83569	0.0664031	0.183447	241.65	0.176575	0.287576	0.614012	0.539208	0.800277
ENSG00000133116	9365	MIRT733670	hsa-mir-10b-5p	Homo sapiens	KL	Homo sapiens	Luciferase reporter assay//Western blot	Functional MTI	25988292	KL	13	NA	NA	NA	NA	NA	NA	NA	NA	NA	NA	NA	NA
ENSG00000133884	5977	MIRT439128	hsa-mir-10b-5p	Homo sapiens	DPF2	Homo sapiens	3'LIFE	Functional MTI (Weak)	25074381	DPF2	11	2562.28	0.00197698	0.108029	0.0183004	0.985399	0.993623	1940.03	-0.196325	0.197154	-0.995796	0.319349	0.648305
ENSG00000134109	9695	MIRT477767	hsa-mir-10b-3p	Homo sapiens	EDEM1	Homo sapiens	PAR-CLIP	Functional MTI (Weak)	21572407	EDEM1	3	9789.35	0.491792	0.118559	4.14809	3.35261e-05	0.000366512	7522.88	-0.280408	0.167498	-1.6741	0.0941118	0.371
ENSG00000134109	9695	MIRT477767	hsa-mir-10b-3p	Homo sapiens	EDEM1	Homo sapiens	PAR-CLIP	Functional MTI (Weak)	23592263	EDEM1	3	9789.35	0.491792	0.118559	4.14809	3.35261e-05	0.000366512	7522.88	-0.280408	0.167498	-1.6741	0.0941118	0.371
ENSG00000134250	4853	MIRT724581	hsa-mir-10b-3p	Homo sapiens	NOTCH2	Homo sapiens	HITS-CLIP	Functional MTI (Weak)	19536157	NOTCH2	1	4400.69	-0.317299	0.111193	-2.85358	0.00432296	0.0222833	898.717	-0.25672	0.250405	-1.02522	0.305259	0.637699
ENSG00000134419	6210	MIRT542713	hsa-mir-10b-5p	Homo sapiens	RPS15A	Homo sapiens	PAR-CLIP	Functional MTI (Weak)	21572407	RPS15A	16	5070.28	0.30658	0.117708	2.60459	0.00919834	0.0410487	13420.4	0.573743	0.184904	3.10292	0.00191621	0.0389864
ENSG00000134453	84991	MIRT047489	hsa-mir-10b-5p	Homo sapiens	RBM17	Homo sapiens	CLASH	Functional MTI (Weak)	23622248	RBM17	10	6260.22	-0.0112987	0.106051	-0.10654	0.915154	0.959509	5712.43	0.188012	0.189221	0.993615	0.320411	0.649601
ENSG00000134817	187	MIRT047418	hsa-mir-10b-5p	Homo sapiens	APLNR	Homo sapiens	CLASH	Functional MTI (Weak)	23622248	APLNR	11	NA	NA	NA	NA	NA	NA	NA	NA	NA	NA	NA	NA
ENSG00000134910	3703	MIRT047423	hsa-mir-10b-5p	Homo sapiens	STT3A	Homo sapiens	CLASH	Functional MTI (Weak)	23622248	STT3A	11	19110.9	0.324751	0.115734	2.80601	0.00501589	0.0252112	6187.2	-0.220527	0.20358	-1.08325	0.278698	0.610989
ENSG00000135333	2045	MIRT548304	hsa-mir-10b-3p	Homo sapiens	EPHA7	Homo sapiens	PAR-CLIP	Functional MTI (Weak)	21572407	EPHA7	6	NA	NA	NA	NA	NA	NA	NA	NA	NA	NA	NA	NA
ENSG00000135862	3915	MIRT047473	hsa-mir-10b-5p	Homo sapiens	LAMC1	Homo sapiens	CLASH	Functional MTI (Weak)	23622248	LAMC1	1	19570	-0.691462	0.111779	-6.186	6.17115e-10	1.84292e-08	4080.79	-0.368449	0.246209	-1.49649	0.134527	0.448665
ENSG00000135956	55654	MIRT698360	hsa-mir-10b-5p	Homo sapiens	TMEM127	Homo sapiens	HITS-CLIP	Functional MTI (Weak)	23313552	TMEM127	2	2921.15	0.0573003	0.106115	0.539985	0.589207	0.765574	2858.25	0.287313	0.158071	1.81762	0.0691217	0.321088
ENSG00000136295	80727	MIRT652026	hsa-mir-10b-5p	Homo sapiens	TTYH3	Homo sapiens	HITS-CLIP	Functional MTI (Weak)	23824327	TTYH3	7	2703.14	0.306069	0.175779	1.74122	0.0816458	0.213511	3205.12	0.495278	0.364525	1.35869	0.174244	0.500448
ENSG00000136450	6426	MIRT006539	hsa-mir-10b-5p	Homo sapiens	SRSF1	Homo sapiens	Luciferase reporter assay	Functional MTI	21118818	SRSF1	17	18051.4	0.0533255	0.103879	0.513345	0.60771	0.779033	11191.9	0.476952	0.172453	2.7657	0.00568011	0.0762151
ENSG00000136521	4711	MIRT549928	hsa-mir-10b-5p	Homo sapiens	NDUFB5	Homo sapiens	PAR-CLIP	Functional MTI (Weak)	21572407	NDUFB5	3	2830.61	-0.0490747	0.117638	-0.417168	0.676556	0.823434	3567.53	0.00949231	0.167875	0.056544	0.954908	0.983152
ENSG00000136527	6434	MIRT006538	hsa-mir-10b-5p	Homo sapiens	TRA2B	Homo sapiens	Luciferase reporter assay	Functional MTI	21118818	TRA2B	3	12373.2	0.113378	0.107707	1.05265	0.2925	0.506595	11305.6	0.20144	0.162974	1.23602	0.21645	0.550533
ENSG00000136527	6434	MIRT006538	hsa-mir-10b-5p	Homo sapiens	TRA2B	Homo sapiens	HITS-CLIP	Functional MTI (Weak)	21572407	TRA2B	3	12373.2	0.113378	0.107707	1.05265	0.2925	0.506595	11305.6	0.20144	0.162974	1.23602	0.21645	0.550533
ENSG00000136826	9314	MIRT003216	hsa-mir-10b-5p	Homo sapiens	KLF4	Homo sapiens	Luciferase reporter assay//Western blot	Functional MTI	27764757	KLF4	9	27.5713	0.998836	0.520523	1.91891	0.0549959	0.159356	NA	NA	NA	NA	NA	NA
ENSG00000136826	9314	MIRT003216	hsa-mir-10b-5p	Homo sapiens	KLF4	Homo sapiens	Flow//qRT-PCR//Western blot	Functional MTI	24216130	KLF4	9	27.5713	0.998836	0.520523	1.91891	0.0549959	0.159356	NA	NA	NA	NA	NA	NA
ENSG00000136826	9314	MIRT003216	hsa-mir-10b-5p	Homo sapiens	KLF4	Homo sapiens	Luciferase reporter assay	Functional MTI	27669739	KLF4	9	27.5713	0.998836	0.520523	1.91891	0.0549959	0.159356	NA	NA	NA	NA	NA	NA
ENSG00000136826	9314	MIRT003216	hsa-mir-10b-5p	Homo sapiens	KLF4	Homo sapiens	Luciferase reporter assay//qRT-PCR//Western blot	Functional MTI	26191201	KLF4	9	27.5713	0.998836	0.520523	1.91891	0.0549959	0.159356	NA	NA	NA	NA	NA	NA
ENSG00000136826	9314	MIRT003216	hsa-mir-10b-5p	Homo sapiens	KLF4	Homo sapiens	Luciferase reporter assay//Western blot	Functional MTI	20075075	KLF4	9	27.5713	0.998836	0.520523	1.91891	0.0549959	0.159356	NA	NA	NA	NA	NA	NA
ENSG00000136826	9314	MIRT003216	hsa-mir-10b-5p	Homo sapiens	KLF4	Homo sapiens	Luciferase reporter assay//qRT-PCR//Western blot	Functional MTI	24573354	KLF4	9	27.5713	0.998836	0.520523	1.91891	0.0549959	0.159356	NA	NA	NA	NA	NA	NA
ENSG00000137310	6941	MIRT439113	hsa-mir-10b-5p	Homo sapiens	TCF19	Homo sapiens	3'LIFE	Functional MTI (Weak)	25074381	TCF19	6	1470.44	-0.596689	0.120374	-4.95698	7.15989e-07	1.19003e-05	2290.59	0.316601	0.184711	1.71404	0.0865219	0.35655
ENSG00000137815	23168	MIRT521282	hsa-mir-10b-3p	Homo sapiens	RTF1	Homo sapiens	PAR-CLIP	Functional MTI (Weak)	23446348	RTF1	15	3727.61	0.00164699	0.118036	0.0139533	0.988867	0.995044	2192.29	-0.553294	0.217282	-2.54643	0.0108832	0.116039
ENSG00000137872	80031	MIRT783082	hsa-mir-10b-3p	Homo sapiens	SEMA6D	Homo sapiens	HITS-CLIP	Functional MTI (Weak)	27418678	SEMA6D	15	103.072	-2.54251	0.270372	-9.40374	5.26569e-21	5.03696e-19	55.1139	-0.426367	0.474895	-0.897813	0.369285	0.688162
ENSG00000138279	310	MIRT439134	hsa-mir-10b-5p	Homo sapiens	ANXA7	Homo sapiens	3'LIFE	Functional MTI (Weak)	25074381	ANXA7	10	5665.92	-0.223979	0.112025	-1.99936	0.0455694	0.13914	3318.24	-0.436302	0.192489	-2.26664	0.0234125	0.177068
ENSG00000138326	6229	MIRT716440	hsa-mir-10b-3p	Homo sapiens	RPS24	Homo sapiens	HITS-CLIP	Functional MTI (Weak)	19536157	RPS24	10	39350.6	0.237136	0.102567	2.312	0.0207776	0.0770904	105217	0.386346	0.245647	1.57277	0.115772	0.414629
ENSG00000138363	471	MIRT761164	hsa-mir-10b-5p	Homo sapiens	ATIC	Homo sapiens	PAR-CLIP	Functional MTI (Weak)	27292025	ATIC	2	12687.1	-0.105992	0.102915	-1.0299	0.303056	0.517569	7110.54	-0.615013	0.197517	-3.11372	0.00184745	0.0384903
ENSG00000138640	10144	MIRT047429	hsa-mir-10b-5p	Homo sapiens	FAM13A	Homo sapiens	CLASH	Functional MTI (Weak)	23622248	FAM13A	4	3216.33	0.414247	0.132177	3.13402	0.00172428	0.0104723	2105.19	-0.271249	0.18087	-1.49969	0.133694	0.446993
ENSG00000139116	55605	MIRT047432	hsa-mir-10b-5p	Homo sapiens	KIF21A	Homo sapiens	CLASH	Functional MTI (Weak)	23622248	KIF21A	12	11328.4	-0.00986867	0.125679	-0.0785227	0.937412	0.97082	4266.82	-0.939622	0.224035	-4.19409	2.73975e-05	0.00232542
ENSG00000139132	121512	MIRT668367	hsa-mir-10b-3p	Homo sapiens	FGD4	Homo sapiens	HITS-CLIP	Functional MTI (Weak)	23824327	FGD4	12	930.395	0.0495159	0.168635	0.293627	0.769043	0.88007	540.428	-0.235045	0.250312	-0.939008	0.347727	0.670016
ENSG00000139641	23344	MIRT047455	hsa-mir-10b-5p	Homo sapiens	ESYT1	Homo sapiens	CLASH	Functional MTI (Weak)	23622248	ESYT1	12	11370.8	0.1284	0.10201	1.2587	0.208139	0.406322	3491.82	-0.553318	0.201818	-2.74167	0.00611276	0.0800853
ENSG00000139668	115825	MIRT651608	hsa-mir-10b-3p	Homo sapiens	WDFY2	Homo sapiens	HITS-CLIP	Functional MTI (Weak)	23824327	WDFY2	13	2006.56	0.157762	0.112508	1.40223	0.160846	0.342981	1322.92	0.237685	0.175217	1.35652	0.174934	0.501224
ENSG00000139793	10150	MIRT732647	hsa-mir-10b-5p	Homo sapiens	MBNL2	Homo sapiens	Luciferase reporter assay	Functional MTI	26881967	MBNL2	13	1265.88	0.0987515	0.140469	0.703012	0.482048	0.681862	1082.51	-0.116142	0.230764	-0.503294	0.614757	0.843014
ENSG00000139998	376267	MIRT534839	hsa-mir-10b-5p	Homo sapiens	RAB15	Homo sapiens	PAR-CLIP	Functional MTI (Weak)	22012620	RAB15	14	959.619	-0.121222	0.125105	-0.968968	0.332561	0.547639	1281.53	0.106667	0.207703	0.513554	0.607564	0.840028
ENSG00000140090	123041	MIRT636234	hsa-mir-10b-5p	Homo sapiens	SLC24A4	Homo sapiens	HITS-CLIP	Functional MTI (Weak)	23824327	SLC24A4	14	NA	NA	NA	NA	NA	NA	NA	NA	NA	NA	NA	NA
ENSG00000140416	7168	MIRT053002	hsa-mir-10b-5p	Homo sapiens	TPM1	Homo sapiens	Western blot	Functional MTI	22766763	TPM1	15	4113.4	-0.0474125	0.13362	-0.35483	0.722717	0.852172	3871.43	-0.0334334	0.253255	-0.132015	0.894973	0.960014
ENSG00000140443	3480	MIRT702768	hsa-mir-10b-3p	Homo sapiens	IGF1R	Homo sapiens	HITS-CLIP	Functional MTI (Weak)	23313552	IGF1R	15	4177.11	0.191713	0.106381	1.80214	0.071524	0.193608	1625.55	-0.298915	0.166585	-1.79437	0.0727542	0.330342
ENSG00000140455	9960	MIRT047466	hsa-mir-10b-5p	Homo sapiens	USP3	Homo sapiens	CLASH	Functional MTI (Weak)	23622248	USP3	15	2934.98	0.163744	0.111736	1.46546	0.142796	0.316852	3346.43	-0.165246	0.122759	-1.3461	0.17827	0.506335
ENSG00000140832	91862	MIRT761156	hsa-mir-10b-3p	Homo sapiens	MARVELD3	Homo sapiens	PAR-CLIP	Functional MTI (Weak)	27292025	MARVELD3	16	63.6346	-0.726383	0.269764	-2.69267	0.00708833	0.033432	62.6951	-0.518281	0.385622	-1.34401	0.178944	0.506669
ENSG00000141279	9520	MIRT472031	hsa-mir-10b-3p	Homo sapiens	NPEPPS	Homo sapiens	PAR-CLIP	Functional MTI (Weak)	23592263	NPEPPS	17	5173.63	-0.215372	0.131506	-1.63774	0.101476	0.248429	1924.72	0.025165	0.16751	0.15023	0.880583	0.95553
ENSG00000141279	9520	MIRT472031	hsa-mir-10b-3p	Homo sapiens	NPEPPS	Homo sapiens	PAR-CLIP	Functional MTI (Weak)	26701625	NPEPPS	17	5173.63	-0.215372	0.131506	-1.63774	0.101476	0.248429	1924.72	0.025165	0.16751	0.15023	0.880583	0.95553
ENSG00000141510	7157	MIRT006923	hsa-mir-10b-5p	Homo sapiens	TP53	Homo sapiens	Luciferase reporter assay	Functional MTI	23034333	TP53	17	5759.93	-0.106352	0.110398	-0.963348	0.335373	0.550197	4815.04	0.065928	0.173035	0.381009	0.703197	0.888306
ENSG00000141965	55527	MIRT735859	hsa-mir-10b-5p	Homo sapiens	FEM1A	Homo sapiens	PAR-CLIP	Functional MTI (Weak)	26701625	FEM1A	19	1823.83	-1.03315	0.126513	-8.16641	3.17703e-16	1.97795e-14	3012.12	0.169887	0.182612	0.930317	0.352207	0.67369
ENSG00000142173	1292	MIRT047410	hsa-mir-10b-5p	Homo sapiens	COL6A2	Homo sapiens	CLASH	Functional MTI (Weak)	23622248	COL6A2	21	NA	NA	NA	NA	NA	NA	NA	NA	NA	NA	NA	NA
ENSG00000142208	207	MIRT735362	hsa-mir-10b-5p	Homo sapiens	AKT1	Homo sapiens	qRT-PCR//Western blot	Functional MTI	27347488	AKT1	14	3432.86	0.18218	0.14834	1.22812	0.219401	0.420355	3898.04	0.313048	0.240926	1.29936	0.193822	0.525172
ENSG00000142937	6202	MIRT047461	hsa-mir-10b-5p	Homo sapiens	RPS8	Homo sapiens	CLASH	Functional MTI (Weak)	23622248	RPS8	1	61126.3	0.423032	0.111487	3.79446	0.000147964	0.00130776	158152	0.686708	0.151616	4.52926	5.91896e-06	0.000952196
ENSG00000143401	81611	MIRT708199	hsa-mir-10b-5p	Homo sapiens	ANP32E	Homo sapiens	HITS-CLIP	Functional MTI (Weak)	21572407	ANP32E	1	8658.13	-0.99202	0.121984	-8.13237	4.20991e-16	2.59461e-14	6008.9	-0.231403	0.192939	-1.19936	0.230388	0.564446
ENSG00000143457	55204	MIRT735854	hsa-mir-10b-3p	Homo sapiens	GOLPH3L	Homo sapiens	PAR-CLIP	Functional MTI (Weak)	26701625	GOLPH3L	1	1090.57	-0.50073	0.152535	-3.28273	0.00102807	0.0067968	1012.29	0.0731609	0.248767	0.294094	0.768686	0.914942
ENSG00000144355	1745	MIRT439130	hsa-mir-10b-5p	Homo sapiens	DLX1	Homo sapiens	3'LIFE	Functional MTI (Weak)	25074381	DLX1	2	167.686	0.575428	0.188829	3.04735	0.00230868	0.0133211	214.347	0.672598	0.384692	1.74841	0.0803932	0.34678
ENSG00000145386	890	MIRT053538	hsa-mir-10b-3p	Homo sapiens	CCNA2	Homo sapiens	Luciferase reporter assay//Microarray//qRT-PCR//Western blot	Functional MTI	23125021	CCNA2	4	2984.32	0.00692278	0.120327	0.0575328	0.954121	0.978851	1795.66	-0.206512	0.211439	-0.976698	0.328719	0.655846
ENSG00000145391	80854	MIRT047488	hsa-mir-10b-5p	Homo sapiens	SETD7	Homo sapiens	CLASH	Functional MTI (Weak)	23622248	SETD7	4	5182.53	0.249423	0.125356	1.98972	0.0466221	0.141484	4072.14	-0.148018	0.207666	-0.71277	0.475988	0.76247
ENSG00000145592	6167	MIRT724302	hsa-mir-10b-3p	Homo sapiens	RPL37	Homo sapiens	HITS-CLIP	Functional MTI (Weak)	19536157	RPL37	5	65943	0.259074	0.118314	2.1897	0.0285457	0.0979839	215636	0.950771	0.204526	4.64866	3.34091e-06	0.000651007
ENSG00000146376	93663	MIRT540207	hsa-mir-10b-5p	Homo sapiens	ARHGAP18	Homo sapiens	PAR-CLIP	Functional MTI (Weak)	21572407	ARHGAP18	6	3801.46	0.0659531	0.141625	0.465688	0.641439	0.80057	3141.46	-0.19552	0.138111	-1.41567	0.156873	0.478457
ENSG00000146386	58527	MIRT316068	hsa-mir-10b-3p	Homo sapiens	ABRACL	Homo sapiens	PAR-CLIP	Functional MTI (Weak)	21572407	ABRACL	6	1095.52	0.589202	0.131767	4.47156	7.76515e-06	9.98702e-05	2062.89	0.075609	0.245261	0.30828	0.757869	0.909874
ENSG00000146425	6993	MIRT523955	hsa-mir-10b-3p	Homo sapiens	DYNLT1	Homo sapiens	PAR-CLIP	Functional MTI (Weak)	21572407	DYNLT1	6	3551.94	-0.473928	0.120453	-3.93456	8.33498e-05	0.000808665	9315.74	0.0813515	0.244697	0.332459	0.739543	0.902972
ENSG00000146425	6993	MIRT523955	hsa-mir-10b-3p	Homo sapiens	DYNLT1	Homo sapiens	PAR-CLIP	Functional MTI (Weak)	23446348	DYNLT1	6	3551.94	-0.473928	0.120453	-3.93456	8.33498e-05	0.000808665	9315.74	0.0813515	0.244697	0.332459	0.739543	0.902972
ENSG00000146729	2631	MIRT047406	hsa-mir-10b-5p	Homo sapiens	NIPSNAP2	Homo sapiens	CLASH	Functional MTI (Weak)	23622248	NIPSNAP2	7	2643.83	-0.322371	0.116599	-2.7648	0.00569585	0.0279631	3100.3	0.0101932	0.201748	0.0505241	0.959705	0.984172
ENSG00000147202	1730	MIRT047452	hsa-mir-10b-5p	Homo sapiens	DIAPH2	Homo sapiens	CLASH	Functional MTI (Weak)	23622248	DIAPH2	X	73.5237	0.554218	0.25872	2.14215	0.0321813	0.10684	121.467	-0.0562589	0.262371	-0.214425	0.830215	0.939783
ENSG00000147255	3547	MIRT047415	hsa-mir-10b-5p	Homo sapiens	IGSF1	Homo sapiens	CLASH	Functional MTI (Weak)	23622248	IGSF1	X	5384.4	0.308448	0.116382	2.65031	0.00804173	0.0369606	1519.21	0.345242	0.181315	1.9041	0.0568972	0.288673
ENSG00000147408	55790	MIRT720893	hsa-mir-10b-5p	Homo sapiens	CSGALNACT1	Homo sapiens	HITS-CLIP	Functional MTI (Weak)	19536157	CSGALNACT1	8	8.50244	-2.31448	0.781231	-2.9626	0.00305049	0.0167339	NA	NA	NA	NA	NA	NA
ENSG00000147548	54904	MIRT047495	hsa-mir-10b-5p	Homo sapiens	NSD3	Homo sapiens	CLASH	Functional MTI (Weak)	23622248	NSD3	8	5900.34	0.16845	0.126202	1.33476	0.181954	0.372135	3278.12	-0.286478	0.158221	-1.81062	0.0701996	0.323414
ENSG00000147889	1029	MIRT006368	hsa-mir-10b-5p	Homo sapiens	CDKN2A	Homo sapiens	CLASH	Functional MTI (Weak)	23622248	CDKN2A	9	786.775	-0.144936	0.133329	-1.08705	0.277015	0.489668	1095.74	0.397309	0.210928	1.88363	0.0596156	0.295537
ENSG00000147889	1029	MIRT006368	hsa-mir-10b-5p	Homo sapiens	CDKN2A	Homo sapiens	Luciferase reporter assay//Western blot	Functional MTI	21471404	CDKN2A	9	786.775	-0.144936	0.133329	-1.08705	0.277015	0.489668	1095.74	0.397309	0.210928	1.88363	0.0596156	0.295537
ENSG00000148296	6838	MIRT047474	hsa-mir-10b-5p	Homo sapiens	SURF6	Homo sapiens	CLASH	Functional MTI (Weak)	23622248	SURF6	9	2235.33	-0.430544	0.136828	-3.1466	0.00165182	0.0101167	1864.43	-0.262727	0.192011	-1.36829	0.171221	0.495161
ENSG00000148400	4851	MIRT006924	hsa-mir-10b-5p	Homo sapiens	NOTCH1	Homo sapiens	Luciferase reporter assay	Functional MTI	23034333	NOTCH1	9	793.082	-0.506484	0.205217	-2.46804	0.0135857	0.0558788	329.803	-0.0264124	0.42394	-0.0623021	0.950322	0.98133
ENSG00000148426	254427	MIRT735857	hsa-mir-10b-3p	Homo sapiens	PROSER2	Homo sapiens	PAR-CLIP	Functional MTI (Weak)	26701625	PROSER2	10	1046.86	-0.0394828	0.116258	-0.339614	0.734147	0.858539	1057.76	0.114561	0.175103	0.654249	0.512951	0.786216
ENSG00000148426	254427	MIRT735857	hsa-mir-10b-3p	Homo sapiens	PROSER2	Homo sapiens	PAR-CLIP	Functional MTI (Weak)	27292025	PROSER2	10	1046.86	-0.0394828	0.116258	-0.339614	0.734147	0.858539	1057.76	0.114561	0.175103	0.654249	0.512951	0.786216
ENSG00000148429	9712	MIRT697736	hsa-mir-10b-5p	Homo sapiens	USP6NL	Homo sapiens	HITS-CLIP	Functional MTI (Weak)	23313552	USP6NL	10	2259.32	-0.00906747	0.124293	-0.0729525	0.941844	0.973214	3096.11	-0.302589	0.226195	-1.33774	0.180983	0.507961
ENSG00000148516	6935	MIRT734679	hsa-mir-10b-5p	Homo sapiens	ZEB1	Homo sapiens	Luciferase reporter assay//Western blot	Functional MTI	25896413	ZEB1	10	1840.91	-0.0891075	0.147215	-0.605287	0.544988	0.732367	1649.29	-0.471671	0.161431	-2.92182	0.0034799	0.0556584
ENSG00000150593	27250	MIRT053003	hsa-mir-10b-5p	Homo sapiens	PDCD4	Homo sapiens	Western blot	Functional MTI	22766763	PDCD4	10	1850.47	0.585557	0.145505	4.02431	5.71431e-05	0.000581757	918.804	-0.683525	0.246991	-2.76741	0.00565041	0.0760442
ENSG00000150768	1737	MIRT047485	hsa-mir-10b-5p	Homo sapiens	DLAT	Homo sapiens	CLASH	Functional MTI (Weak)	23622248	DLAT	11	6748.1	0.492409	0.129933	3.78973	0.000150814	0.00132719	4245.53	-0.436272	0.185296	-2.35445	0.01855	0.156201
ENSG00000151414	140609	MIRT047478	hsa-mir-10b-5p	Homo sapiens	NEK7	Homo sapiens	CLASH	Functional MTI (Weak)	23622248	NEK7	1	2254.07	-0.033598	0.135438	-0.248069	0.804081	0.901179	1840.64	-0.28016	0.183781	-1.52442	0.127404	0.435648
ENSG00000151498	27034	MIRT685420	hsa-mir-10b-5p	Homo sapiens	ACAD8	Homo sapiens	HITS-CLIP	Functional MTI (Weak)	23313552	ACAD8	11	2223.95	0.256067	0.108729	2.3551	0.0185177	0.0706912	1383.99	-0.150042	0.200665	-0.747724	0.454627	0.750238
ENSG00000152601	4154	MIRT732645	hsa-mir-10b-5p	Homo sapiens	MBNL1	Homo sapiens	Luciferase reporter assay	Functional MTI	26881967	MBNL1	3	6522.21	0.401538	0.128462	3.12574	0.00177357	0.0107149	5190.48	-0.0672182	0.160267	-0.419413	0.674914	0.87577
ENSG00000153037	6728	MIRT761173	hsa-mir-10b-5p	Homo sapiens	2019-08-01	Homo sapiens	PAR-CLIP	Functional MTI (Weak)	27292025	2019-08-01	5	938.233	-0.0359974	0.132099	-0.272504	0.785234	0.890333	1478.28	0.0494197	0.200113	0.246959	0.80494	0.930821
ENSG00000153094	10018	MIRT006366	hsa-mir-10b-5p	Homo sapiens	BCL2L11	Homo sapiens	Luciferase reporter assay//Western blot	Functional MTI	21471404	BCL2L11	2	2290.98	-0.64137	0.132745	-4.83158	1.35454e-06	2.11005e-05	2522.14	0.162564	0.171799	0.946246	0.344023	0.667728
ENSG00000153094	10018	MIRT006366	hsa-mir-10b-5p	Homo sapiens	BCL2L11	Homo sapiens	PAR-CLIP//HITS-CLIP	Functional MTI (Weak)	21572407	BCL2L11	2	2290.98	-0.64137	0.132745	-4.83158	1.35454e-06	2.11005e-05	2522.14	0.162564	0.171799	0.946246	0.344023	0.667728
ENSG00000153094	10018	MIRT006366	hsa-mir-10b-5p	Homo sapiens	BCL2L11	Homo sapiens	PAR-CLIP	Functional MTI (Weak)	20371350	BCL2L11	2	2290.98	-0.64137	0.132745	-4.83158	1.35454e-06	2.11005e-05	2522.14	0.162564	0.171799	0.946246	0.344023	0.667728
ENSG00000153094	10018	MIRT006366	hsa-mir-10b-5p	Homo sapiens	BCL2L11	Homo sapiens	PAR-CLIP	Functional MTI (Weak)	26701625	BCL2L11	2	2290.98	-0.64137	0.132745	-4.83158	1.35454e-06	2.11005e-05	2522.14	0.162564	0.171799	0.946246	0.344023	0.667728
ENSG00000153721	154043	MIRT704518	hsa-mir-10b-5p	Homo sapiens	CNKSR3	Homo sapiens	HITS-CLIP	Functional MTI (Weak)	23313552	CNKSR3	6	2970.1	-0.18165	0.119917	-1.5148	0.129823	0.295785	1513.14	-0.12217	0.222907	-0.548078	0.583638	0.827851
ENSG00000156299	7074	MIRT053593	hsa-mir-10b-5p	Homo sapiens	TIAM1	Homo sapiens	Luciferase reporter assay//qRT-PCR//Western blot	Functional MTI	24481854	TIAM1	21	NA	NA	NA	NA	NA	NA	NA	NA	NA	NA	NA	NA
ENSG00000156413	2528	MIRT047444	hsa-mir-10b-5p	Homo sapiens	FUT6	Homo sapiens	CLASH	Functional MTI (Weak)	23622248	FUT6	19	67.5818	1.66105	0.315019	5.27287	1.34306e-07	2.62411e-06	53.7688	0.150587	0.536422	0.280726	0.778921	0.920349
ENSG00000156515	3098	MIRT047433	hsa-mir-10b-5p	Homo sapiens	HK1	Homo sapiens	CLASH	Functional MTI (Weak)	23622248	HK1	10	NA	NA	NA	NA	NA	NA	NA	NA	NA	NA	NA	NA
ENSG00000156675	80223	MIRT505974	hsa-mir-10b-3p	Homo sapiens	RAB11FIP1	Homo sapiens	PAR-CLIP	Functional MTI (Weak)	21572407	RAB11FIP1	8	3351.16	0.284988	0.114026	2.49933	0.0124428	0.0522341	1466.88	-0.397865	0.165464	-2.40454	0.016193	0.143609
ENSG00000156675	80223	MIRT505974	hsa-mir-10b-3p	Homo sapiens	RAB11FIP1	Homo sapiens	PAR-CLIP	Functional MTI (Weak)	23446348	RAB11FIP1	8	3351.16	0.284988	0.114026	2.49933	0.0124428	0.0522341	1466.88	-0.397865	0.165464	-2.40454	0.016193	0.143609
ENSG00000156869	391059	MIRT688180	hsa-mir-10b-5p	Homo sapiens	FRRS1	Homo sapiens	HITS-CLIP	Functional MTI (Weak)	23313552	FRRS1	1	3529.27	0.454404	0.143266	3.17176	0.0015152	0.00941097	1581.17	-0.372999	0.181813	-2.05156	0.0402128	0.239989
ENSG00000157426	132949	MIRT047487	hsa-mir-10b-5p	Homo sapiens	AASDH	Homo sapiens	CLASH	Functional MTI (Weak)	23622248	AASDH	4	830.676	0.226053	0.14646	1.54344	0.122723	0.284516	582.083	0.0107928	0.190582	0.0566306	0.954839	0.983152
ENSG00000158258	64084	MIRT761154	hsa-mir-10b-3p	Homo sapiens	CLSTN2	Homo sapiens	PAR-CLIP	Functional MTI (Weak)	27292025	CLSTN2	3	NA	NA	NA	NA	NA	NA	NA	NA	NA	NA	NA	NA
ENSG00000158457	340348	MIRT047482	hsa-mir-10b-5p	Homo sapiens	TSPAN33	Homo sapiens	CLASH	Functional MTI (Weak)	23622248	TSPAN33	7	302.793	0.134697	0.153663	0.876574	0.380718	0.594429	465.217	0.469909	0.277832	1.69134	0.0907717	0.364901
ENSG00000158467	23382	MIRT735858	hsa-mir-10b-5p	Homo sapiens	AHCYL2	Homo sapiens	PAR-CLIP	Functional MTI (Weak)	26701625	AHCYL2	7	1312.49	0.276176	0.126355	2.18571	0.0288367	0.0986777	675.677	-0.32608	0.154335	-2.11281	0.0346172	0.221136
ENSG00000158545	124245	MIRT047405	hsa-mir-10b-5p	Homo sapiens	ZC3H18	Homo sapiens	CLASH	Functional MTI (Weak)	23622248	ZC3H18	16	4946.23	-0.168335	0.137827	-1.22135	0.221954	0.423786	1936.47	-0.418103	0.192421	-2.17286	0.0297911	0.203536
ENSG00000158604	222068	MIRT761174	hsa-mir-10b-5p	Homo sapiens	TMED4	Homo sapiens	PAR-CLIP	Functional MTI (Weak)	27292025	TMED4	7	5652.07	0.228808	0.106505	2.14834	0.0316871	0.105639	6188.83	0.625587	0.178705	3.50068	0.000464081	0.0158925
ENSG00000158615	84919	MIRT470411	hsa-mir-10b-5p	Homo sapiens	PPP1R15B	Homo sapiens	PAR-CLIP	Functional MTI (Weak)	23592263	PPP1R15B	1	5528.48	-0.0888197	0.103135	-0.861197	0.38913	0.602898	7181.05	-0.16292	0.173033	-0.94155	0.346423	0.669287
ENSG00000159140	6651	MIRT510734	hsa-mir-10b-5p	Homo sapiens	SON	Homo sapiens	PAR-CLIP	Functional MTI (Weak)	23446348	SON	21	22490.2	-0.233074	0.105968	-2.19948	0.0278436	0.0963042	6390.95	-0.559358	0.176493	-3.1693	0.00152807	0.034853
ENSG00000159140	6651	MIRT510734	hsa-mir-10b-5p	Homo sapiens	SON	Homo sapiens	PAR-CLIP	Functional MTI (Weak)	20371350	SON	21	22490.2	-0.233074	0.105968	-2.19948	0.0278436	0.0963042	6390.95	-0.559358	0.176493	-3.1693	0.00152807	0.034853
ENSG00000159140	6651	MIRT510734	hsa-mir-10b-5p	Homo sapiens	SON	Homo sapiens	PAR-CLIP	Functional MTI (Weak)	21572407	SON	21	22490.2	-0.233074	0.105968	-2.19948	0.0278436	0.0963042	6390.95	-0.559358	0.176493	-3.1693	0.00152807	0.034853
ENSG00000159202	65264	MIRT047448	hsa-mir-10b-5p	Homo sapiens	UBE2Z	Homo sapiens	CLASH	Functional MTI (Weak)	23622248	UBE2Z	17	5840.79	-0.105241	0.115636	-0.910098	0.362771	0.576671	5716.32	0.0624485	0.177896	0.351039	0.725559	0.89663
ENSG00000159259	8208	MIRT636640	hsa-mir-10b-5p	Homo sapiens	CHAF1B	Homo sapiens	HITS-CLIP	Functional MTI (Weak)	23824327	CHAF1B	21	1090.2	-0.401955	0.115566	-3.47814	0.000504901	0.00372709	553.341	-0.214033	0.184791	-1.15824	0.246765	0.580443
ENSG00000159692	1487	MIRT047493	hsa-mir-10b-5p	Homo sapiens	CTBP1	Homo sapiens	CLASH	Functional MTI (Weak)	23622248	CTBP1	4	4783.94	-0.452956	0.148381	-3.05266	0.00226825	0.0131499	5890.14	0.251478	0.292531	0.859662	0.389976	0.706032
ENSG00000160062	653121	MIRT761175	hsa-mir-10b-5p	Homo sapiens	ZBTB8A	Homo sapiens	PAR-CLIP	Functional MTI (Weak)	27292025	ZBTB8A	1	178.321	-0.197934	0.225355	-0.87832	0.37977	0.593453	201.004	-0.501879	0.231539	-2.16758	0.0301907	0.204749
ENSG00000160285	4047	MIRT047498	hsa-mir-10b-5p	Homo sapiens	LSS	Homo sapiens	CLASH	Functional MTI (Weak)	23622248	LSS	21	19853.2	0.0688232	0.134395	0.512097	0.608583	0.779716	7659.26	-0.111692	0.179282	-0.622992	0.53329	0.798123
ENSG00000160908	84124	MIRT697366	hsa-mir-10b-5p	Homo sapiens	ZNF394	Homo sapiens	HITS-CLIP	Functional MTI (Weak)	23313552	ZNF394	7	1000.26	0.0436879	0.118543	0.368542	0.712469	0.845865	1080.14	-0.0647399	0.229407	-0.282206	0.777786	0.919834
ENSG00000160991	80228	MIRT047449	hsa-mir-10b-5p	Homo sapiens	ORAI2	Homo sapiens	CLASH	Functional MTI (Weak)	23622248	ORAI2	7	361.91	0.055121	0.151977	0.362693	0.716834	0.848659	565.835	0.312039	0.321292	0.9712	0.331449	0.657029
ENSG00000160993	54784	MIRT648660	hsa-mir-10b-5p	Homo sapiens	ALKBH4	Homo sapiens	HITS-CLIP	Functional MTI (Weak)	23824327	ALKBH4	7	449.426	-0.108597	0.144711	-0.750442	0.452989	0.658404	848.288	-0.00496723	0.196	-0.0253431	0.979781	0.992915
ENSG00000161202	1857	MIRT523979	hsa-mir-10b-5p	Homo sapiens	DVL3	Homo sapiens	PAR-CLIP	Functional MTI (Weak)	23446348	DVL3	3	4452.21	-0.0156992	0.119777	-0.13107	0.89572	0.94987	3707.07	0.342256	0.151182	2.26387	0.0235819	0.177602
ENSG00000161547	6427	MIRT698859	hsa-mir-10b-3p	Homo sapiens	SRSF2	Homo sapiens	HITS-CLIP	Functional MTI (Weak)	23313552	SRSF2	17	16875.1	-0.200141	0.106554	-1.87831	0.0603389	0.170464	13055.6	0.818378	0.196641	4.16178	3.15777e-05	0.00251079
ENSG00000162368	51727	MIRT071380	hsa-mir-10b-5p	Homo sapiens	CMPK1	Homo sapiens	PAR-CLIP	Functional MTI (Weak)	20371350	CMPK1	1	17570.5	0.246918	0.134623	1.83414	0.0666332	0.183834	16995.4	0.244305	0.27876	0.876396	0.380815	0.698913
ENSG00000162368	51727	MIRT071380	hsa-mir-10b-5p	Homo sapiens	CMPK1	Homo sapiens	PAR-CLIP	Functional MTI (Weak)	23446348	CMPK1	1	17570.5	0.246918	0.134623	1.83414	0.0666332	0.183834	16995.4	0.244305	0.27876	0.876396	0.380815	0.698913
ENSG00000162368	51727	MIRT071380	hsa-mir-10b-5p	Homo sapiens	CMPK1	Homo sapiens	PAR-CLIP	Functional MTI (Weak)	21572407	CMPK1	1	17570.5	0.246918	0.134623	1.83414	0.0666332	0.183834	16995.4	0.244305	0.27876	0.876396	0.380815	0.698913
ENSG00000162374	1996	MIRT658748	hsa-mir-10b-3p	Homo sapiens	ELAVL4	Homo sapiens	HITS-CLIP	Functional MTI (Weak)	23824327	ELAVL4	1	16.3881	-0.303095	0.517114	-0.586128	0.557789	0.742398	NA	NA	NA	NA	NA	NA
ENSG00000162873	55220	MIRT673242	hsa-mir-10b-5p	Homo sapiens	KLHDC8A	Homo sapiens	HITS-CLIP	Functional MTI (Weak)	23824327	KLHDC8A	1	NA	NA	NA	NA	NA	NA	NA	NA	NA	NA	NA	NA
ENSG00000163347	9076	MIRT484230	hsa-mir-10b-3p	Homo sapiens	CLDN1	Homo sapiens	PAR-CLIP	Functional MTI (Weak)	23592263	CLDN1	3	17804.8	0.0431767	0.154001	0.280366	0.779197	0.886333	15251	0.240629	0.369801	0.650699	0.515241	0.787392
ENSG00000163376	84541	MIRT506912	hsa-mir-10b-3p	Homo sapiens	KBTBD8	Homo sapiens	PAR-CLIP	Functional MTI (Weak)	23446348	KBTBD8	3	182.945	0.271326	0.217248	1.24892	0.211693	0.410795	181.394	-0.149281	0.308201	-0.484364	0.628128	0.850557
ENSG00000163376	84541	MIRT506912	hsa-mir-10b-3p	Homo sapiens	KBTBD8	Homo sapiens	PAR-CLIP	Functional MTI (Weak)	22012620	KBTBD8	3	182.945	0.271326	0.217248	1.24892	0.211693	0.410795	181.394	-0.149281	0.308201	-0.484364	0.628128	0.850557
ENSG00000163376	84541	MIRT506912	hsa-mir-10b-3p	Homo sapiens	KBTBD8	Homo sapiens	PAR-CLIP	Functional MTI (Weak)	21572407	KBTBD8	3	182.945	0.271326	0.217248	1.24892	0.211693	0.410795	181.394	-0.149281	0.308201	-0.484364	0.628128	0.850557
ENSG00000163545	81788	MIRT439120	hsa-mir-10b-5p	Homo sapiens	NUAK2	Homo sapiens	3'LIFE	Functional MTI (Weak)	25074381	NUAK2	1	395.501	-0.79371	0.22342	-3.55254	0.00038153	0.00293679	573.698	0.0625827	0.336248	0.18612	0.85235	0.945534
ENSG00000163807	57456	MIRT714628	hsa-mir-10b-5p	Homo sapiens	KIAA1143	Homo sapiens	HITS-CLIP	Functional MTI (Weak)	19536157	KIAA1143	3	3249.67	-0.141844	0.120676	-1.17541	0.239832	0.445521	2863.4	-0.119918	0.199405	-0.601376	0.54759	0.805546
ENSG00000163946	23272	MIRT688302	hsa-mir-10b-5p	Homo sapiens	FAM208A	Homo sapiens	HITS-CLIP	Functional MTI (Weak)	23313552	NA	NA	2801.47	0.308317	0.120598	2.55656	0.0105713	0.0458638	1711.71	-0.494432	0.167228	-2.95664	0.00311014	0.0520929
ENSG00000163960	26043	MIRT697787	hsa-mir-10b-5p	Homo sapiens	UBXN7	Homo sapiens	HITS-CLIP	Functional MTI (Weak)	23313552	UBXN7	3	3694.77	-0.0623794	0.138648	-0.449913	0.652773	0.806305	1805.16	-0.503832	0.208308	-2.41868	0.0155768	0.140669
ENSG00000164087	25886	MIRT459964	hsa-mir-10b-5p	Homo sapiens	POC1A	Homo sapiens	PAR-CLIP	Functional MTI (Weak)	23592263	POC1A	3	1529.28	-0.217664	0.115949	-1.87724	0.0604848	0.170771	2272.46	0.0194992	0.163726	0.119096	0.905199	0.964602
ENSG00000164161	64399	MIRT687954	hsa-mir-10b-5p	Homo sapiens	HHIP	Homo sapiens	HITS-CLIP	Functional MTI (Weak)	23313552	HHIP	4	NA	NA	NA	NA	NA	NA	NA	NA	NA	NA	NA	NA
ENSG00000164181	79993	MIRT720740	hsa-mir-10b-5p	Homo sapiens	ELOVL7	Homo sapiens	HITS-CLIP	Functional MTI (Weak)	19536157	ELOVL7	5	769.234	0.0592491	0.162958	0.363585	0.716168	0.848196	565.63	-0.267358	0.229603	-1.16444	0.244248	0.578454
ENSG00000164236	651746	MIRT508099	hsa-mir-10b-5p	Homo sapiens	ANKRD33B	Homo sapiens	PAR-CLIP	Functional MTI (Weak)	26701625	ANKRD33B	5	568.068	-0.348465	0.155727	-2.23767	0.0252428	0.0896036	337.06	-0.0806765	0.250085	-0.322596	0.747001	0.905367
ENSG00000164236	651746	MIRT508099	hsa-mir-10b-5p	Homo sapiens	ANKRD33B	Homo sapiens	PAR-CLIP	Functional MTI (Weak)	21572407	ANKRD33B	5	568.068	-0.348465	0.155727	-2.23767	0.0252428	0.0896036	337.06	-0.0806765	0.250085	-0.322596	0.747001	0.905367
ENSG00000164236	651746	MIRT508099	hsa-mir-10b-5p	Homo sapiens	ANKRD33B	Homo sapiens	PAR-CLIP	Functional MTI (Weak)	23446348	ANKRD33B	5	568.068	-0.348465	0.155727	-2.23767	0.0252428	0.0896036	337.06	-0.0806765	0.250085	-0.322596	0.747001	0.905367
ENSG00000164291	153642	MIRT097758	hsa-mir-10b-5p	Homo sapiens	ARSK	Homo sapiens	PAR-CLIP	Functional MTI (Weak)	21572407	ARSK	5	404.247	-0.400247	0.163225	-2.45212	0.0142018	0.0578518	298.969	0.0997305	0.19528	0.510706	0.609557	0.84087
ENSG00000164902	51808	MIRT695372	hsa-mir-10b-5p	Homo sapiens	PHAX	Homo sapiens	HITS-CLIP	Functional MTI (Weak)	23313552	PHAX	5	2071.49	0.0192222	0.128304	0.149818	0.880908	0.942576	2118.18	-0.534521	0.213409	-2.50468	0.0122562	0.123589
ENSG00000165304	9833	MIRT628004	hsa-mir-10b-3p	Homo sapiens	MELK	Homo sapiens	HITS-CLIP	Functional MTI (Weak)	23824327	MELK	9	8565.29	-0.256236	0.11249	-2.27786	0.0227348	0.0826516	6523.87	-0.21111	0.197544	-1.06867	0.285219	0.617237
ENSG00000165572	89890	MIRT047472	hsa-mir-10b-5p	Homo sapiens	KBTBD6	Homo sapiens	CLASH	Functional MTI (Weak)	23622248	KBTBD6	13	980.384	-0.0253888	0.121166	-0.209537	0.834029	0.918716	706.901	-0.168558	0.233804	-0.720938	0.470948	0.759332
ENSG00000165714	118426	MIRT664014	hsa-mir-10b-5p	Homo sapiens	BORCS5	Homo sapiens	HITS-CLIP	Functional MTI (Weak)	23824327	BORCS5	12	521.759	0.199887	0.137652	1.45211	0.14647	0.322087	426.323	-0.0189743	0.212156	-0.0894359	0.928735	0.972323
ENSG00000165841	1557	MIRT528537	hsa-mir-10b-3p	Homo sapiens	CYP2C19	Homo sapiens	PAR-CLIP	Functional MTI (Weak)	20371350	CYP2C19	10	7.17402	1.57268	0.802125	1.96064	0.0499213	0.148719	NA	NA	NA	NA	NA	NA
ENSG00000165841	1557	MIRT528537	hsa-mir-10b-3p	Homo sapiens	CYP2C19	Homo sapiens	PAR-CLIP	Functional MTI (Weak)	26701625	CYP2C19	10	7.17402	1.57268	0.802125	1.96064	0.0499213	0.148719	NA	NA	NA	NA	NA	NA
ENSG00000165841	1557	MIRT528537	hsa-mir-10b-3p	Homo sapiens	CYP2C19	Homo sapiens	PAR-CLIP	Functional MTI (Weak)	22012620	CYP2C19	10	7.17402	1.57268	0.802125	1.96064	0.0499213	0.148719	NA	NA	NA	NA	NA	NA
ENSG00000165841	1557	MIRT528537	hsa-mir-10b-3p	Homo sapiens	CYP2C19	Homo sapiens	PAR-CLIP	Functional MTI (Weak)	27292025	CYP2C19	10	7.17402	1.57268	0.802125	1.96064	0.0499213	0.148719	NA	NA	NA	NA	NA	NA
ENSG00000166105	112937	MIRT047426	hsa-mir-10b-5p	Homo sapiens	GLB1L3	Homo sapiens	CLASH	Functional MTI (Weak)	23622248	GLB1L3	11	NA	NA	NA	NA	NA	NA	NA	NA	NA	NA	NA	NA
ENSG00000166181	8539	MIRT617413	hsa-mir-10b-5p	Homo sapiens	API5	Homo sapiens	HITS-CLIP	Functional MTI (Weak)	23824327	API5	11	7812.79	0.041563	0.116383	0.357122	0.721001	0.850967	4006.66	-0.482447	0.181214	-2.6623	0.00776077	0.0928082
ENSG00000166822	124491	MIRT707824	hsa-mir-10b-5p	Homo sapiens	TMEM170A	Homo sapiens	HITS-CLIP	Functional MTI (Weak)	21572407	TMEM170A	16	2276.51	-0.00120883	0.126659	-0.00954394	0.992385	0.996836	3476.65	-0.185024	0.185024	-1	0.317309	0.646705
ENSG00000166851	5347	MIRT053537	hsa-mir-10b-3p	Homo sapiens	PLK1	Homo sapiens	Luciferase reporter assay//Microarray//qRT-PCR//Western blot	Functional MTI	23125021	PLK1	16	4439.57	-0.346838	0.133197	-2.60395	0.0092156	0.0411109	3155.32	-0.302802	0.173264	-1.74763	0.0805279	0.34678
ENSG00000166888	6778	MIRT439116	hsa-mir-10b-5p	Homo sapiens	STAT6	Homo sapiens	3'LIFE	Functional MTI (Weak)	25074381	STAT6	12	1019.61	-0.0462259	0.122187	-0.378321	0.705192	0.841284	570.243	0.448279	0.180754	2.48006	0.0131361	0.128075
ENSG00000167193	1398	MIRT439131	hsa-mir-10b-5p	Homo sapiens	CRK	Homo sapiens	3'LIFE	Functional MTI (Weak)	25074381	CRK	17	3653.88	-0.161231	0.113813	-1.41662	0.156593	0.337557	3830.22	-0.0744454	0.205952	-0.361469	0.717749	0.894588
ENSG00000167258	51755	MIRT047459	hsa-mir-10b-5p	Homo sapiens	CDK12	Homo sapiens	CLASH	Functional MTI (Weak)	23622248	CDK12	17	7629.87	-0.264899	0.101664	-2.60564	0.00917022	0.0409582	2625.12	-0.241014	0.172206	-1.39957	0.161643	0.483427
ENSG00000167286	915	MIRT761166	hsa-mir-10b-5p	Homo sapiens	CD3D	Homo sapiens	PAR-CLIP	Functional MTI (Weak)	27292025	CD3D	11	NA	NA	NA	NA	NA	NA	NA	NA	NA	NA	NA	NA
ENSG00000167378	126298	MIRT539892	hsa-mir-10b-5p	Homo sapiens	IRGQ	Homo sapiens	PAR-CLIP//HITS-CLIP	Functional MTI (Weak)	21572407	IRGQ	19	3401.49	0.218907	0.11137	1.96558	0.0493476	0.147448	2538.96	-0.489557	0.247484	-1.97813	0.0479139	0.265156
ENSG00000167460	7171	MIRT560944	hsa-mir-10b-5p	Homo sapiens	TPM4	Homo sapiens	PAR-CLIP	Functional MTI (Weak)	20371350	TPM4	19	15528.2	-0.424337	0.131011	-3.23894	0.00119977	0.00775332	15839	0.104917	0.338178	0.310242	0.756377	0.909874
ENSG00000167460	7171	MIRT560944	hsa-mir-10b-5p	Homo sapiens	TPM4	Homo sapiens	HITS-CLIP	Functional MTI (Weak)	21572407	TPM4	19	15528.2	-0.424337	0.131011	-3.23894	0.00119977	0.00775332	15839	0.104917	0.338178	0.310242	0.756377	0.909874
ENSG00000167601	558	MIRT707502	hsa-mir-10b-5p	Homo sapiens	AXL	Homo sapiens	HITS-CLIP	Functional MTI (Weak)	21572407	AXL	19	NA	NA	NA	NA	NA	NA	NA	NA	NA	NA	NA	NA
ENSG00000167699	51031	MIRT047475	hsa-mir-10b-5p	Homo sapiens	GLOD4	Homo sapiens	CLASH	Functional MTI (Weak)	23622248	GLOD4	17	2443.01	-0.202073	0.110885	-1.82237	0.068399	0.187411	2207.35	0.145266	0.177782	0.817105	0.413868	0.722963
ENSG00000168826	166793	MIRT529712	hsa-mir-10b-3p	Homo sapiens	ZBTB49	Homo sapiens	PAR-CLIP	Functional MTI (Weak)	22012620	ZBTB49	4	341.535	-0.387746	0.150706	-2.57286	0.0100862	0.0441897	635.259	-0.0460289	0.225537	-0.204086	0.838287	0.941091
ENSG00000168907	255189	MIRT047465	hsa-mir-10b-5p	Homo sapiens	PLA2G4F	Homo sapiens	CLASH	Functional MTI (Weak)	23622248	PLA2G4F	15	NA	NA	NA	NA	NA	NA	NA	NA	NA	NA	NA	NA
ENSG00000169018	10116	MIRT047427	hsa-mir-10b-5p	Homo sapiens	FEM1B	Homo sapiens	CLASH	Functional MTI (Weak)	23622248	FEM1B	15	5911.38	0.147035	0.125211	1.1743	0.240275	0.446063	5316.73	-0.0542553	0.175976	-0.30831	0.757846	0.909874
ENSG00000169247	79628	MIRT616359	hsa-mir-10b-3p	Homo sapiens	SH3TC2	Homo sapiens	HITS-CLIP	Functional MTI (Weak)	23824327	SH3TC2	5	NA	NA	NA	NA	NA	NA	NA	NA	NA	NA	NA	NA
ENSG00000169247	79628	MIRT616359	hsa-mir-10b-3p	Homo sapiens	SH3TC2	Homo sapiens	HITS-CLIP	Functional MTI (Weak)	27418678	SH3TC2	5	NA	NA	NA	NA	NA	NA	NA	NA	NA	NA	NA	NA
ENSG00000169515	83987	MIRT761165	hsa-mir-10b-5p	Homo sapiens	CCDC8	Homo sapiens	PAR-CLIP	Functional MTI (Weak)	27292025	CCDC8	19	NA	NA	NA	NA	NA	NA	NA	NA	NA	NA	NA	NA
ENSG00000169679	699	MIRT053536	hsa-mir-10b-3p	Homo sapiens	BUB1	Homo sapiens	Luciferase reporter assay//Microarray//qRT-PCR//Western blot	Functional MTI	23125021	BUB1	2	6730.56	-0.180268	0.117588	-1.53306	0.125262	0.288872	3277.84	-0.677081	0.224695	-3.01334	0.00258389	0.0467296
ENSG00000169710	2194	MIRT047454	hsa-mir-10b-5p	Homo sapiens	FASN	Homo sapiens	CLASH	Functional MTI (Weak)	23622248	FASN	17	54906.9	-0.20937	0.342403	-0.611473	0.540886	0.729055	10574.2	0.192746	0.666208	0.289318	0.772338	0.91632
ENSG00000169813	3185	MIRT047469	hsa-mir-10b-5p	Homo sapiens	HNRNPF	Homo sapiens	CLASH	Functional MTI (Weak)	23622248	HNRNPF	10	11096.3	0.126282	0.101845	1.23995	0.214996	0.414569	6148.09	-0.291892	0.143568	-2.03313	0.0420396	0.24624
ENSG00000169814	686	MIRT442233	hsa-mir-10b-3p	Homo sapiens	BTD	Homo sapiens	PAR-CLIP	Functional MTI (Weak)	22100165	BTD	3	2345.1	-0.0620494	0.107238	-0.578613	0.56285	0.745999	1231.36	-0.305098	0.195814	-1.5581	0.11921	0.421776
ENSG00000170214	147	MIRT047408	hsa-mir-10b-5p	Homo sapiens	ADRA1B	Homo sapiens	CLASH	Functional MTI (Weak)	23622248	ADRA1B	5	NA	NA	NA	NA	NA	NA	NA	NA	NA	NA	NA	NA
ENSG00000170279	202865	MIRT530601	hsa-mir-10b-3p	Homo sapiens	C7orf33	Homo sapiens	PAR-CLIP	Functional MTI (Weak)	22012620	C7orf33	7	NA	NA	NA	NA	NA	NA	NA	NA	NA	NA	NA	NA
ENSG00000170279	202865	MIRT530601	hsa-mir-10b-3p	Homo sapiens	C7orf33	Homo sapiens	PAR-CLIP	Functional MTI (Weak)	20371350	C7orf33	7	NA	NA	NA	NA	NA	NA	NA	NA	NA	NA	NA	NA
ENSG00000170624	6444	MIRT442965	hsa-mir-10b-3p	Homo sapiens	SGCD	Homo sapiens	PAR-CLIP	Functional MTI (Weak)	22100165	SGCD	5	NA	NA	NA	NA	NA	NA	NA	NA	NA	NA	NA	NA
ENSG00000170889	6203	MIRT047453	hsa-mir-10b-5p	Homo sapiens	RPS9	Homo sapiens	CLASH	Functional MTI (Weak)	23622248	RPS9	19	23619.3	0.125697	0.139441	0.901432	0.367359	0.58128	46184	0.677741	0.232843	2.91073	0.0036059	0.0568844
ENSG00000171246	4884	MIRT047499	hsa-mir-10b-5p	Homo sapiens	NPTX1	Homo sapiens	CLASH	Functional MTI (Weak)	23622248	NPTX1	17	NA	NA	NA	NA	NA	NA	NA	NA	NA	NA	NA	NA
ENSG00000171467	24149	MIRT047411	hsa-mir-10b-5p	Homo sapiens	ZNF318	Homo sapiens	CLASH	Functional MTI (Weak)	23622248	ZNF318	6	1515.25	-0.347689	0.152729	-2.27651	0.0228156	0.0828946	612.08	-0.248373	0.207975	-1.19424	0.232384	0.566724
ENSG00000171608	5293	MIRT047463	hsa-mir-10b-5p	Homo sapiens	PIK3CD	Homo sapiens	CLASH	Functional MTI (Weak)	23622248	PIK3CD	1	116.933	-0.0574772	0.220693	-0.260439	0.794525	0.895832	75.1855	0.0200904	0.383157	0.0524338	0.958183	0.983636
ENSG00000171862	5728	MIRT054912	hsa-mir-10b-5p	Homo sapiens	PTEN	Homo sapiens	Luciferase reporter assay	Functional MTI	24100613	PTEN	10	3078.47	0.581936	0.119416	4.87318	1.09817e-06	1.75535e-05	3978.47	-0.165291	0.180127	-0.917638	0.358809	0.679568
ENSG00000171862	5728	MIRT054912	hsa-mir-10b-5p	Homo sapiens	PTEN	Homo sapiens	Luciferase reporter assay	Functional MTI	27113763	PTEN	10	3078.47	0.581936	0.119416	4.87318	1.09817e-06	1.75535e-05	3978.47	-0.165291	0.180127	-0.917638	0.358809	0.679568
ENSG00000171862	5728	MIRT054912	hsa-mir-10b-5p	Homo sapiens	PTEN	Homo sapiens	Immunoblot//Luciferase reporter assay//qRT-PCR	Functional MTI	23384558	PTEN	10	3078.47	0.581936	0.119416	4.87318	1.09817e-06	1.75535e-05	3978.47	-0.165291	0.180127	-0.917638	0.358809	0.679568
ENSG00000171992	11346	MIRT530548	hsa-mir-10b-5p	Homo sapiens	SYNPO	Homo sapiens	PAR-CLIP	Functional MTI (Weak)	22012620	SYNPO	5	613.241	0.102752	0.219002	0.469182	0.63894	0.799371	470.157	-0.437224	0.363451	-1.20298	0.228983	0.563389
ENSG00000172201	3400	MIRT099598	hsa-mir-10b-5p	Homo sapiens	ID4	Homo sapiens	PAR-CLIP	Functional MTI (Weak)	22012620	ID4	6	1046.97	0.127141	0.181032	0.702314	0.482484	0.682215	883.064	0.70215	0.279208	2.51479	0.0119103	0.121969
ENSG00000172201	3400	MIRT099598	hsa-mir-10b-5p	Homo sapiens	ID4	Homo sapiens	PAR-CLIP	Functional MTI (Weak)	20371350	ID4	6	1046.97	0.127141	0.181032	0.702314	0.482484	0.682215	883.064	0.70215	0.279208	2.51479	0.0119103	0.121969
ENSG00000172201	3400	MIRT099598	hsa-mir-10b-5p	Homo sapiens	ID4	Homo sapiens	PAR-CLIP	Functional MTI (Weak)	23446348	ID4	6	1046.97	0.127141	0.181032	0.702314	0.482484	0.682215	883.064	0.70215	0.279208	2.51479	0.0119103	0.121969
ENSG00000172819	5916	MIRT439118	hsa-mir-10b-5p	Homo sapiens	RARG	Homo sapiens	3'LIFE	Functional MTI (Weak)	25074381	RARG	12	182.047	0.298831	0.195768	1.52645	0.126897	0.291162	242.49	-1.3077e-05	0.225895	-5.78898e-05	0.999954	0.999954
ENSG00000173209	130872	MIRT708208	hsa-mir-10b-5p	Homo sapiens	AHSA2	Homo sapiens	HITS-CLIP	Functional MTI (Weak)	21572407	NA	NA	2762.3	-0.0213001	0.117745	-0.180899	0.856447	0.930408	1067.79	0.198581	0.34612	0.573733	0.566148	0.818181
ENSG00000173598	11163	MIRT708005	hsa-mir-10b-5p	Homo sapiens	NUDT4	Homo sapiens	HITS-CLIP	Functional MTI (Weak)	21572407	NUDT4	12	2085.36	-0.281583	0.133548	-2.10848	0.0349897	0.11398	2413.55	-0.0495874	0.160636	-0.308694	0.757554	0.909874
ENSG00000173812	10209	MIRT047434	hsa-mir-10b-5p	Homo sapiens	EIF1	Homo sapiens	CLASH	Functional MTI (Weak)	23622248	EIF1	17	19155.1	-0.139951	0.103886	-1.34716	0.177927	0.3675	35355.5	0.532734	0.232792	2.28845	0.0221112	0.172169
ENSG00000173992	9973	MIRT617468	hsa-mir-10b-5p	Homo sapiens	CCS	Homo sapiens	HITS-CLIP	Functional MTI (Weak)	23824327	CCS	11	3975.96	-0.168534	0.153067	-1.10105	0.270874	0.482764	3618.32	1.04217	0.210689	4.94651	7.55561e-07	0.000246841
ENSG00000174032	253512	MIRT047420	hsa-mir-10b-5p	Homo sapiens	SLC25A30	Homo sapiens	CLASH	Functional MTI (Weak)	23622248	SLC25A30	13	821.809	-0.0566656	0.135995	-0.416674	0.676917	0.823601	892.975	0.036308	0.195813	0.185422	0.852898	0.945534
ENSG00000174106	23592	MIRT047401	hsa-mir-10b-5p	Homo sapiens	LEMD3	Homo sapiens	CLASH	Functional MTI (Weak)	23622248	LEMD3	12	2907.01	0.0501205	0.114907	0.436182	0.662705	0.813061	1775.26	-0.464337	0.225061	-2.06316	0.0390971	0.237762
ENSG00000174231	10594	MIRT047439	hsa-mir-10b-5p	Homo sapiens	PRPF8	Homo sapiens	CLASH	Functional MTI (Weak)	23622248	PRPF8	17	27460.5	-0.0931584	0.113036	-0.824149	0.409855	0.622768	4643.05	-0.365602	0.209775	-1.74283	0.081364	0.347553
ENSG00000174718	55196	MIRT664058	hsa-mir-10b-5p	Homo sapiens	KIAA1551	Homo sapiens	HITS-CLIP	Functional MTI (Weak)	23824327	NA	NA	4040.34	-0.021056	0.132692	-0.158682	0.873919	0.939444	3530.93	-0.164837	0.151344	-1.08915	0.276086	0.607849
ENSG00000174891	51319	MIRT732648	hsa-mir-10b-5p	Homo sapiens	RSRC1	Homo sapiens	Luciferase reporter assay	Functional MTI	26881967	RSRC1	3	1414.1	0.187406	0.120022	1.56143	0.118422	0.277557	1288.57	-0.092413	0.192764	-0.47941	0.631647	0.852403
ENSG00000174951	2523	MIRT542194	hsa-mir-10b-5p	Homo sapiens	FUT1	Homo sapiens	PAR-CLIP	Functional MTI (Weak)	21572407	FUT1	19	16.8772	1.15326	0.62581	1.84283	0.0653535	0.181202	NA	NA	NA	NA	NA	NA
ENSG00000174951	2523	MIRT542194	hsa-mir-10b-5p	Homo sapiens	FUT1	Homo sapiens	HITS-CLIP	Functional MTI (Weak)	23706177	FUT1	19	16.8772	1.15326	0.62581	1.84283	0.0653535	0.181202	NA	NA	NA	NA	NA	NA
ENSG00000174951	2523	MIRT542194	hsa-mir-10b-5p	Homo sapiens	FUT1	Homo sapiens	HITS-CLIP	Functional MTI (Weak)	23824327	FUT1	19	16.8772	1.15326	0.62581	1.84283	0.0653535	0.181202	NA	NA	NA	NA	NA	NA
ENSG00000174951	2523	MIRT542194	hsa-mir-10b-5p	Homo sapiens	FUT1	Homo sapiens	PAR-CLIP	Functional MTI (Weak)	27292025	FUT1	19	16.8772	1.15326	0.62581	1.84283	0.0653535	0.181202	NA	NA	NA	NA	NA	NA
ENSG00000174951	2523	MIRT542194	hsa-mir-10b-5p	Homo sapiens	FUT1	Homo sapiens	HITS-CLIP	Functional MTI (Weak)	27418678	FUT1	19	16.8772	1.15326	0.62581	1.84283	0.0653535	0.181202	NA	NA	NA	NA	NA	NA
ENSG00000175066	256356	MIRT708130	hsa-mir-10b-5p	Homo sapiens	GK5	Homo sapiens	HITS-CLIP	Functional MTI (Weak)	21572407	GK5	3	1194.71	0.335032	0.1134	2.95442	0.00313258	0.0170822	838.922	-0.172908	0.268156	-0.644806	0.519053	0.788855
ENSG00000175193	55486	MIRT047451	hsa-mir-10b-5p	Homo sapiens	PARL	Homo sapiens	CLASH	Functional MTI (Weak)	23622248	PARL	3	1699.64	0.0917077	0.121392	0.755467	0.449969	0.655958	3286.72	-0.00886371	0.21085	-0.042038	0.966468	0.987817
ENSG00000175224	9776	MIRT047462	hsa-mir-10b-5p	Homo sapiens	ATG13	Homo sapiens	CLASH	Functional MTI (Weak)	23622248	ATG13	11	3555.16	-0.144941	0.102903	-1.40852	0.158977	0.340658	3989.26	0.0617915	0.154375	0.400269	0.688958	0.88192
ENSG00000175426	5122	MIRT530373	hsa-mir-10b-3p	Homo sapiens	PCSK1	Homo sapiens	PAR-CLIP	Functional MTI (Weak)	22012620	PCSK1	5	NA	NA	NA	NA	NA	NA	NA	NA	NA	NA	NA	NA
ENSG00000176390	51379	MIRT558567	hsa-mir-10b-5p	Homo sapiens	CRLF3	Homo sapiens	PAR-CLIP	Functional MTI (Weak)	20371350	CRLF3	17	1176.32	-0.643602	0.125305	-5.13627	2.8025e-07	5.00781e-06	1196.53	-0.333964	0.186168	-1.79388	0.0728319	0.33037
ENSG00000176390	51379	MIRT558567	hsa-mir-10b-5p	Homo sapiens	CRLF3	Homo sapiens	PAR-CLIP	Functional MTI (Weak)	21572407	CRLF3	17	1176.32	-0.643602	0.125305	-5.13627	2.8025e-07	5.00781e-06	1196.53	-0.333964	0.186168	-1.79388	0.0728319	0.33037
ENSG00000177034	345778	MIRT609433	hsa-mir-10b-5p	Homo sapiens	MTX3	Homo sapiens	HITS-CLIP	Functional MTI (Weak)	23824327	MTX3	5	2698.12	0.110123	0.122838	0.896496	0.369988	0.58368	2174.23	-0.119109	0.203602	-0.585008	0.558542	0.812023
ENSG00000177084	5426	MIRT735856	hsa-mir-10b-3p	Homo sapiens	POLE	Homo sapiens	PAR-CLIP	Functional MTI (Weak)	26701625	POLE	12	9571.72	0.0394131	0.138673	0.284216	0.776245	0.884241	2936.52	-0.505829	0.258907	-1.95371	0.0507353	0.271744
ENSG00000177463	7182	MIRT522214	hsa-mir-10b-5p	Homo sapiens	NR2C2	Homo sapiens	PAR-CLIP	Functional MTI (Weak)	21572407	NR2C2	3	4732.53	0.0493393	0.108723	0.453809	0.649966	0.804927	2572.09	-0.243176	0.188041	-1.29321	0.19594	0.527958
ENSG00000177463	7182	MIRT522214	hsa-mir-10b-5p	Homo sapiens	NR2C2	Homo sapiens	PAR-CLIP	Functional MTI (Weak)	23446348	NR2C2	3	4732.53	0.0493393	0.108723	0.453809	0.649966	0.804927	2572.09	-0.243176	0.188041	-1.29321	0.19594	0.527958
ENSG00000177463	7182	MIRT522214	hsa-mir-10b-5p	Homo sapiens	NR2C2	Homo sapiens	PAR-CLIP	Functional MTI (Weak)	20371350	NR2C2	3	4732.53	0.0493393	0.108723	0.453809	0.649966	0.804927	2572.09	-0.243176	0.188041	-1.29321	0.19594	0.527958
ENSG00000177663	23765	MIRT631782	hsa-mir-10b-3p	Homo sapiens	IL17RA	Homo sapiens	HITS-CLIP	Functional MTI (Weak)	23824327	IL17RA	22	1250.1	0.0979341	0.12745	0.768411	0.442243	0.649467	658.382	-0.416662	0.160019	-2.60383	0.00921888	0.104142
ENSG00000178386	7766	MIRT550161	hsa-mir-10b-5p	Homo sapiens	ZNF223	Homo sapiens	PAR-CLIP	Functional MTI (Weak)	21572407	ZNF223	19	57.1849	0.0108536	0.288752	0.037588	0.970016	0.986245	62.4254	0.0688022	0.356943	0.192754	0.847152	0.943439
ENSG00000178386	7766	MIRT550161	hsa-mir-10b-5p	Homo sapiens	ZNF223	Homo sapiens	PAR-CLIP	Functional MTI (Weak)	20371350	ZNF223	19	57.1849	0.0108536	0.288752	0.037588	0.970016	0.986245	62.4254	0.0688022	0.356943	0.192754	0.847152	0.943439
ENSG00000178573	4094	MIRT556364	hsa-mir-10b-3p	Homo sapiens	MAF	Homo sapiens	PAR-CLIP	Functional MTI (Weak)	21572407	MAF	16	670.365	0.340124	0.162072	2.0986	0.035852	0.115966	739.539	0.0886519	0.201523	0.43991	0.660002	0.868633
ENSG00000178662	80034	MIRT299202	hsa-mir-10b-5p	Homo sapiens	CSRNP3	Homo sapiens	PAR-CLIP	Functional MTI (Weak)	21572407	CSRNP3	2	1340.33	0.340555	0.151376	2.24973	0.0244659	0.0876763	830.505	-0.37262	0.242612	-1.53587	0.12457	0.430386
ENSG00000178719	2907	MIRT047457	hsa-mir-10b-5p	Homo sapiens	GRINA	Homo sapiens	CLASH	Functional MTI (Weak)	23622248	GRINA	8	3789.73	0.346223	0.127622	2.71289	0.0066699	0.031785	3498.17	0.52496	0.186339	2.81724	0.00484384	0.0685775
ENSG00000178921	5198	MIRT047471	hsa-mir-10b-5p	Homo sapiens	PFAS	Homo sapiens	CLASH	Functional MTI (Weak)	23622248	PFAS	17	4234.9	-0.141806	0.132283	-1.07199	0.283723	0.496983	1083.6	0.449212	0.179804	2.49835	0.0124775	0.124456
ENSG00000179094	5187	MIRT535387	hsa-mir-10b-3p	Homo sapiens	PER1	Homo sapiens	PAR-CLIP	Functional MTI (Weak)	22012620	PER1	17	1006.68	0.0991356	0.155991	0.635521	0.525089	0.716636	561.663	-0.0117604	0.322517	-0.0364644	0.970912	0.989654
ENSG00000180185	81889	MIRT661950	hsa-mir-10b-5p	Homo sapiens	FAHD1	Homo sapiens	HITS-CLIP	Functional MTI (Weak)	23824327	FAHD1	16	1324.09	0.177848	0.120502	1.4759	0.139971	0.312244	1733.01	0.118591	0.198395	0.597751	0.550006	0.807185
ENSG00000180340	2535	MIRT694761	hsa-mir-10b-5p	Homo sapiens	FZD2	Homo sapiens	HITS-CLIP	Functional MTI (Weak)	23313552	FZD2	17	23.6881	-1.2405	0.477137	-2.59989	0.00932541	0.0414642	NA	NA	NA	NA	NA	NA
ENSG00000181222	5430	MIRT047400	hsa-mir-10b-5p	Homo sapiens	POLR2A	Homo sapiens	CLASH	Functional MTI (Weak)	23622248	POLR2A	17	22094.5	-0.28256	0.120499	-2.3449	0.019032	0.0721894	3519.34	-1.01705	0.241227	-4.21615	2.48511e-05	0.00220394
ENSG00000181894	79673	MIRT761176	hsa-mir-10b-5p	Homo sapiens	ZNF329	Homo sapiens	PAR-CLIP	Functional MTI (Weak)	27292025	ZNF329	19	698.237	0.0193106	0.135124	0.14291	0.886361	0.945184	1322.9	-0.265464	0.18542	-1.43169	0.152232	0.472781
ENSG00000182010	219790	MIRT047409	hsa-mir-10b-5p	Homo sapiens	RTKN2	Homo sapiens	CLASH	Functional MTI (Weak)	23622248	RTKN2	10	1322.85	-0.408278	0.137577	-2.96762	0.00300115	0.0165423	808.549	-0.458151	0.189038	-2.42359	0.015368	0.139772
ENSG00000182141	7562	MIRT684557	hsa-mir-10b-5p	Homo sapiens	ZNF708	Homo sapiens	HITS-CLIP	Functional MTI (Weak)	23313552	ZNF708	19	1249.32	0.138238	0.124503	1.11032	0.266863	0.477932	1095.34	-0.104355	0.206793	-0.504636	0.613814	0.842826
ENSG00000182261	338322	MIRT723413	hsa-mir-10b-3p	Homo sapiens	NLRP10	Homo sapiens	HITS-CLIP	Functional MTI (Weak)	19536157	NLRP10	11	NA	NA	NA	NA	NA	NA	NA	NA	NA	NA	NA	NA
ENSG00000182372	2055	MIRT704599	hsa-mir-10b-5p	Homo sapiens	CLN8	Homo sapiens	HITS-CLIP	Functional MTI (Weak)	23313552	CLN8	8	908.118	-0.0753508	0.127174	-0.592503	0.553514	0.739548	735.462	-0.228405	0.220653	-1.03513	0.300608	0.63369
ENSG00000182985	23705	MIRT574847	hsa-mir-10b-5p	Homo sapiens	CADM1	Homo sapiens	PAR-CLIP	Functional MTI (Weak)	20371350	CADM1	11	3117.67	-0.290127	0.114255	-2.53929	0.0111078	0.0476805	1707.36	-0.610393	0.189927	-3.21383	0.00130978	0.0320723
ENSG00000183117	64478	MIRT734672	hsa-mir-10b-5p	Homo sapiens	CSMD1	Homo sapiens	Immunocytochemistry//Immunohistochemistry//Luciferase reporter assay//qRT-PCR	Functional MTI	27756250	CSMD1	8	NA	NA	NA	NA	NA	NA	NA	NA	NA	NA	NA	NA
ENSG00000183137	285753	MIRT619277	hsa-mir-10b-3p	Homo sapiens	CEP57L1	Homo sapiens	HITS-CLIP	Functional MTI (Weak)	23824327	CEP57L1	6	869.456	-0.535645	0.14533	-3.68573	0.00022805	0.00189167	700.158	-0.504588	0.188703	-2.67398	0.00749565	0.0908872
ENSG00000183734	430	MIRT439132	hsa-mir-10b-5p	Homo sapiens	ASCL2	Homo sapiens	3'LIFE	Functional MTI (Weak)	25074381	ASCL2	11	NA	NA	NA	NA	NA	NA	NA	NA	NA	NA	NA	NA
ENSG00000183778	10317	MIRT660400	hsa-mir-10b-3p	Homo sapiens	B3GALT5	Homo sapiens	HITS-CLIP	Functional MTI (Weak)	23824327	B3GALT5	21	NA	NA	NA	NA	NA	NA	NA	NA	NA	NA	NA	NA
ENSG00000183808	389677	MIRT498894	hsa-mir-10b-5p	Homo sapiens	RBM12B	Homo sapiens	PAR-CLIP	Functional MTI (Weak)	21572407	RBM12B	8	2350.08	0.108785	0.118992	0.914217	0.360603	0.574201	1269.87	-0.358509	0.253902	-1.412	0.157951	0.479396
ENSG00000183808	389677	MIRT498894	hsa-mir-10b-5p	Homo sapiens	RBM12B	Homo sapiens	PAR-CLIP	Functional MTI (Weak)	24398324	RBM12B	8	2350.08	0.108785	0.118992	0.914217	0.360603	0.574201	1269.87	-0.358509	0.253902	-1.412	0.157951	0.479396
ENSG00000183850	100129543	MIRT642320	hsa-mir-10b-3p	Homo sapiens	ZNF730	Homo sapiens	HITS-CLIP	Functional MTI (Weak)	23824327	ZNF730	19	286.994	-0.909639	0.16177	-5.62303	1.87634e-08	4.31476e-07	207.366	-0.396017	0.306677	-1.29132	0.196593	0.529003
ENSG00000184009	71	MIRT047480	hsa-mir-10b-5p	Homo sapiens	ACTG1	Homo sapiens	CLASH	Functional MTI (Weak)	23622248	ACTG1	17	59842.3	-0.500757	0.112727	-4.44222	8.90367e-06	0.000112908	47563.2	-0.0533448	0.213496	-0.249863	0.802693	0.930478
ENSG00000185000	8694	MIRT723334	hsa-mir-10b-5p	Homo sapiens	DGAT1	Homo sapiens	HITS-CLIP	Functional MTI (Weak)	19536157	DGAT1	8	2440.96	0.00302073	0.188981	0.0159843	0.987247	0.994232	1795.72	1.04107	0.359137	2.89882	0.00374575	0.058293
ENSG00000185009	26985	MIRT047435	hsa-mir-10b-5p	Homo sapiens	AP3M1	Homo sapiens	CLASH	Functional MTI (Weak)	23622248	AP3M1	10	5610.25	-0.175773	0.126612	-1.38828	0.165051	0.348629	3512.64	-0.265154	0.179482	-1.47733	0.139586	0.455728
ENSG00000185219	353274	MIRT662019	hsa-mir-10b-5p	Homo sapiens	ZNF445	Homo sapiens	HITS-CLIP	Functional MTI (Weak)	23824327	ZNF445	3	10299.1	0.252836	0.103189	2.45022	0.0142768	0.0581139	5417.8	-0.148452	0.27429	-0.541223	0.588354	0.831292
ENSG00000185245	2811	MIRT732376	hsa-mir-10b-5p	Homo sapiens	GP1BA	Homo sapiens	Luciferase reporter assay//qRT-PCR	Functional MTI	27834869	GP1BA	17	NA	NA	NA	NA	NA	NA	NA	NA	NA	NA	NA	NA
ENSG00000185432	25840	MIRT517388	hsa-mir-10b-5p	Homo sapiens	METTL7A	Homo sapiens	PAR-CLIP	Functional MTI (Weak)	23446348	METTL7A	12	7364.64	0.946191	0.148345	6.37831	1.79055e-10	5.78964e-09	7408.42	0.056819	0.192655	0.294927	0.76805	0.914533
ENSG00000185627	5719	MIRT047503	hsa-mir-10b-5p	Homo sapiens	PSMD13	Homo sapiens	CLASH	Functional MTI (Weak)	23622248	PSMD13	11	10172.2	-0.136237	0.100992	-1.34898	0.177343	0.366788	8459.77	0.180105	0.208869	0.862288	0.388529	0.704995
ENSG00000185658	54014	MIRT119141	hsa-mir-10b-3p	Homo sapiens	BRWD1	Homo sapiens	HITS-CLIP	Functional MTI (Weak)	23313552	BRWD1	21	2819.29	-0.0486774	0.129422	-0.376115	0.706831	0.842489	1483.42	-0.328083	0.153383	-2.13898	0.032437	0.213495
ENSG00000185800	1762	MIRT047468	hsa-mir-10b-5p	Homo sapiens	DMWD	Homo sapiens	CLASH	Functional MTI (Weak)	23622248	DMWD	19	798.038	-0.357306	0.149564	-2.38898	0.016895	0.0659638	1004.53	0.384331	0.251765	1.52655	0.126873	0.434261
ENSG00000186193	89958	MIRT709198	hsa-mir-10b-5p	Homo sapiens	SAPCD2	Homo sapiens	HITS-CLIP	Functional MTI (Weak)	19536157	SAPCD2	9	4047.46	-0.555199	0.159558	-3.47961	0.00050215	0.00370985	4913.6	0.366163	0.281101	1.3026	0.19271	0.523595
ENSG00000186480	3638	MIRT475186	hsa-mir-10b-3p	Homo sapiens	INSIG1	Homo sapiens	PAR-CLIP	Functional MTI (Weak)	24398324	INSIG1	7	13847.6	0.754756	0.1129	6.6852	2.30602e-11	8.45356e-10	15125	0.00698545	0.208341	0.0335289	0.973253	0.990507
ENSG00000186480	3638	MIRT475186	hsa-mir-10b-3p	Homo sapiens	INSIG1	Homo sapiens	PAR-CLIP	Functional MTI (Weak)	23592263	INSIG1	7	13847.6	0.754756	0.1129	6.6852	2.30602e-11	8.45356e-10	15125	0.00698545	0.208341	0.0335289	0.973253	0.990507
ENSG00000186480	3638	MIRT475186	hsa-mir-10b-3p	Homo sapiens	INSIG1	Homo sapiens	PAR-CLIP	Functional MTI (Weak)	20371350	INSIG1	7	13847.6	0.754756	0.1129	6.6852	2.30602e-11	8.45356e-10	15125	0.00698545	0.208341	0.0335289	0.973253	0.990507
ENSG00000186951	5465	MIRT005068	hsa-mir-10b-5p	Homo sapiens	PPARA	Homo sapiens	Luciferase reporter assay//qRT-PCR//Western blot	Functional MTI	19780876	PPARA	22	1802.28	0.519258	0.170733	3.04134	0.0023553	0.0135342	1666.46	-0.264942	0.23016	-1.15112	0.249682	0.583407
ENSG00000187109	4673	MIRT047497	hsa-mir-10b-5p	Homo sapiens	NAP1L1	Homo sapiens	CLASH	Functional MTI (Weak)	23622248	NAP1L1	12	42260.1	0.149422	0.113033	1.32193	0.18619	0.37802	47315.7	0.30858	0.175342	1.75988	0.0784284	0.342718
ENSG00000187980	391013	MIRT508627	hsa-mir-10b-5p	Homo sapiens	PLA2G2C	Homo sapiens	PAR-CLIP	Functional MTI (Weak)	23446348	PLA2G2C	1	NA	NA	NA	NA	NA	NA	NA	NA	NA	NA	NA	NA
ENSG00000188375	440093	MIRT475884	hsa-mir-10b-5p	Homo sapiens	H3F3C	Homo sapiens	PAR-CLIP	Functional MTI (Weak)	26701625	NA	NA	25.8558	-0.319971	0.422458	-0.757402	0.448809	0.654816	NA	NA	NA	NA	NA	NA
ENSG00000188375	440093	MIRT475884	hsa-mir-10b-5p	Homo sapiens	H3F3C	Homo sapiens	PAR-CLIP	Functional MTI (Weak)	23592263	NA	NA	25.8558	-0.319971	0.422458	-0.757402	0.448809	0.654816	NA	NA	NA	NA	NA	NA
ENSG00000188375	440093	MIRT475884	hsa-mir-10b-5p	Homo sapiens	H3F3C	Homo sapiens	PAR-CLIP	Functional MTI (Weak)	21572407	NA	NA	25.8558	-0.319971	0.422458	-0.757402	0.448809	0.654816	NA	NA	NA	NA	NA	NA
ENSG00000188375	440093	MIRT475884	hsa-mir-10b-5p	Homo sapiens	H3F3C	Homo sapiens	PAR-CLIP	Functional MTI (Weak)	27292025	NA	NA	25.8558	-0.319971	0.422458	-0.757402	0.448809	0.654816	NA	NA	NA	NA	NA	NA
ENSG00000188375	440093	MIRT475884	hsa-mir-10b-5p	Homo sapiens	H3F3C	Homo sapiens	PAR-CLIP	Functional MTI (Weak)	24398324	NA	NA	25.8558	-0.319971	0.422458	-0.757402	0.448809	0.654816	NA	NA	NA	NA	NA	NA
ENSG00000188375	440093	MIRT475884	hsa-mir-10b-5p	Homo sapiens	H3F3C	Homo sapiens	PAR-CLIP	Functional MTI (Weak)	20371350	NA	NA	25.8558	-0.319971	0.422458	-0.757402	0.448809	0.654816	NA	NA	NA	NA	NA	NA
ENSG00000188375	440093	MIRT475884	hsa-mir-10b-5p	Homo sapiens	H3F3C	Homo sapiens	PAR-CLIP	Functional MTI (Weak)	23446348	NA	NA	25.8558	-0.319971	0.422458	-0.757402	0.448809	0.654816	NA	NA	NA	NA	NA	NA
ENSG00000188921	401494	MIRT716120	hsa-mir-10b-3p	Homo sapiens	HACD4	Homo sapiens	HITS-CLIP	Functional MTI (Weak)	19536157	HACD4	9	NA	NA	NA	NA	NA	NA	NA	NA	NA	NA	NA	NA
ENSG00000196090	11122	MIRT047447	hsa-mir-10b-5p	Homo sapiens	PTPRT	Homo sapiens	CLASH	Functional MTI (Weak)	23622248	PTPRT	20	NA	NA	NA	NA	NA	NA	NA	NA	NA	NA	NA	NA
ENSG00000196236	63929	MIRT707354	hsa-mir-10b-5p	Homo sapiens	XPNPEP3	Homo sapiens	HITS-CLIP	Functional MTI (Weak)	21572407	XPNPEP3	22	2049.91	0.0366615	0.120865	0.303327	0.761641	0.875144	1543.16	-0.50567	0.215284	-2.34885	0.0188316	0.157996
ENSG00000196498	9612	MIRT005455	hsa-mir-10b-5p	Homo sapiens	NCOR2	Homo sapiens	qRT-PCR//Western blot	Functional MTI	21212796	NCOR2	12	1060.66	-0.154267	0.166986	-0.92383	0.355575	0.569701	632.753	-0.442064	0.3966	-1.11464	0.265007	0.596545
ENSG00000196498	9612	MIRT005455	hsa-mir-10b-5p	Homo sapiens	NCOR2	Homo sapiens	3'LIFE	Functional MTI (Weak)	25074381	NCOR2	12	1060.66	-0.154267	0.166986	-0.92383	0.355575	0.569701	632.753	-0.442064	0.3966	-1.11464	0.265007	0.596545
ENSG00000196653	91392	MIRT531040	hsa-mir-10b-5p	Homo sapiens	ZNF502	Homo sapiens	PAR-CLIP	Functional MTI (Weak)	22012620	ZNF502	3	NA	NA	NA	NA	NA	NA	NA	NA	NA	NA	NA	NA
ENSG00000196712	4763	MIRT005504	hsa-mir-10b-5p	Homo sapiens	NF1	Homo sapiens	GFP reporter assay//Luciferase reporter assay//Microarray//qRT-PCR	Functional MTI	20550523	NF1	17	6639.2	-0.313935	0.12989	-2.41693	0.0156521	0.0622896	2272.36	-0.482861	0.172282	-2.80274	0.005067	0.0704543
ENSG00000196821	64771	MIRT047483	hsa-mir-10b-5p	Homo sapiens	C6orf106	Homo sapiens	CLASH	Functional MTI (Weak)	23622248	NA	NA	5840.43	-0.0297076	0.117776	-0.252239	0.800857	0.8995	6914.16	0.0143532	0.199064	0.0721034	0.94252	0.978152
ENSG00000196890	128312	MIRT610569	hsa-mir-10b-3p	Homo sapiens	HIST3H2BB	Homo sapiens	HITS-CLIP	Functional MTI (Weak)	23824327	NA	NA	91.8606	0.180752	0.261647	0.690824	0.489676	0.687779	233.305	0.130337	0.416657	0.312816	0.75442	0.908758
ENSG00000196890	128312	MIRT610569	hsa-mir-10b-3p	Homo sapiens	HIST3H2BB	Homo sapiens	HITS-CLIP	Functional MTI (Weak)	27418678	NA	NA	91.8606	0.180752	0.261647	0.690824	0.489676	0.687779	233.305	0.130337	0.416657	0.312816	0.75442	0.908758
ENSG00000197714	10794	MIRT519731	hsa-mir-10b-5p	Homo sapiens	ZNF460	Homo sapiens	PAR-CLIP	Functional MTI (Weak)	23446348	ZNF460	19	311.904	0.44175	0.192401	2.29598	0.021677	0.0796079	157.057	0.0821187	0.254541	0.322615	0.746987	0.905367
ENSG00000198055	2870	MIRT497271	hsa-mir-10b-5p	Homo sapiens	GRK6	Homo sapiens	PAR-CLIP	Functional MTI (Weak)	22291592	GRK6	5	1723.55	-0.345567	0.168301	-2.05327	0.0400464	0.12594	2197.3	0.419133	0.327451	1.27999	0.20055	0.533886
ENSG00000198646	23054	MIRT439122	hsa-mir-10b-5p	Homo sapiens	NCOA6	Homo sapiens	3'LIFE	Functional MTI (Weak)	25074381	NCOA6	20	6061.5	0.154493	0.115741	1.33481	0.181939	0.372135	4349.55	0.0281527	0.151301	0.186071	0.852389	0.945534
ENSG00000198663	221477	MIRT625243	hsa-mir-10b-5p	Homo sapiens	C6orf89	Homo sapiens	HITS-CLIP	Functional MTI (Weak)	23824327	C6orf89	6	2708.38	-0.0932562	0.11881	-0.78492	0.4325	0.641261	2179.84	-0.0335789	0.174815	-0.192083	0.847677	0.943533
ENSG00000198695	4541	MIRT047440	hsa-mir-10b-5p	Homo sapiens	ND6	Homo sapiens	CLASH	Functional MTI (Weak)	23622248	NA	NA	10880	-0.694378	0.594634	-1.16774	0.242912	0.449186	4322.45	-0.316882	0.54856	-0.577661	0.563493	0.8159
ENSG00000198814	2710	MIRT047490	hsa-mir-10b-5p	Homo sapiens	GK	Homo sapiens	CLASH	Functional MTI (Weak)	23622248	GK	X	1078.5	0.76161	0.130618	5.8308	5.51619e-09	1.4209e-07	623.427	-0.37969	0.179382	-2.11666	0.034289	0.220134
ENSG00000198830	3151	MIRT536817	hsa-mir-10b-5p	Homo sapiens	HMGN2	Homo sapiens	PAR-CLIP	Functional MTI (Weak)	26701625	HMGN2	1	8276.9	0.244624	0.100188	2.44165	0.0146202	0.059053	14683.5	0.333282	0.198972	1.67502	0.0939309	0.370746
ENSG00000198830	3151	MIRT536817	hsa-mir-10b-5p	Homo sapiens	HMGN2	Homo sapiens	PAR-CLIP	Functional MTI (Weak)	22012620	HMGN2	1	8276.9	0.244624	0.100188	2.44165	0.0146202	0.059053	14683.5	0.333282	0.198972	1.67502	0.0939309	0.370746
ENSG00000198917	51490	MIRT047464	hsa-mir-10b-5p	Homo sapiens	SPOUT1	Homo sapiens	CLASH	Functional MTI (Weak)	23622248	SPOUT1	9	2466.85	-0.505809	0.139692	-3.62089	0.000293587	0.00235383	2314.14	0.452741	0.180732	2.50505	0.0122435	0.123551
ENSG00000204175	9721	MIRT528261	hsa-mir-10b-3p	Homo sapiens	GPRIN2	Homo sapiens	PAR-CLIP	Functional MTI (Weak)	22012620	GPRIN2	10	NA	NA	NA	NA	NA	NA	NA	NA	NA	NA	NA	NA
ENSG00000204388	3304	MIRT047430	hsa-mir-10b-5p	Homo sapiens	HSPA1B	Homo sapiens	CLASH	Functional MTI (Weak)	23622248	HSPA1B	6	748.571	-0.474496	0.193782	-2.44861	0.014341	0.058297	230.41	0.102691	0.309009	0.332323	0.739646	0.903018
ENSG00000204501	653619	MIRT761160	hsa-mir-10b-3p	Homo sapiens	PRAMEF15	Homo sapiens	PAR-CLIP	Functional MTI (Weak)	27292025	PRAMEF15	1	NA	NA	NA	NA	NA	NA	NA	NA	NA	NA	NA	NA
ENSG00000204505	343070	MIRT761163	hsa-mir-10b-3p	Homo sapiens	PRAMEF9	Homo sapiens	PAR-CLIP	Functional MTI (Weak)	27292025	PRAMEF9	1	NA	NA	NA	NA	NA	NA	NA	NA	NA	NA	NA	NA
ENSG00000204592	3133	MIRT618779	hsa-mir-10b-5p	Homo sapiens	HLA-E	Homo sapiens	HITS-CLIP	Functional MTI (Weak)	23824327	HLA-E	6	478.637	1.0458	0.172102	6.07665	1.22718e-09	3.51065e-08	433.527	-0.00583775	0.267141	-0.0218527	0.982565	0.994542
ENSG00000204709	729583	MIRT735855	hsa-mir-10b-3p	Homo sapiens	LINC01556	Homo sapiens	PAR-CLIP	Functional MTI (Weak)	27292025	NA	NA	20.7454	-0.487546	0.512537	-0.95124	0.341482	0.556526	NA	NA	NA	NA	NA	NA
ENSG00000204709	729583	MIRT735855	hsa-mir-10b-3p	Homo sapiens	LINC01556	Homo sapiens	PAR-CLIP	Functional MTI (Weak)	26701625	NA	NA	20.7454	-0.487546	0.512537	-0.95124	0.341482	0.556526	NA	NA	NA	NA	NA	NA
ENSG00000205189	65986	MIRT545952	hsa-mir-10b-3p	Homo sapiens	ZBTB10	Homo sapiens	PAR-CLIP	Functional MTI (Weak)	21572407	ZBTB10	8	1186.02	0.0375151	0.142572	0.263131	0.792449	0.894427	730.195	-0.328832	0.242441	-1.35634	0.174991	0.501224
ENSG00000205531	4676	MIRT692015	hsa-mir-10b-3p	Homo sapiens	NAP1L4	Homo sapiens	HITS-CLIP	Functional MTI (Weak)	23313552	NAP1L4	11	7070.09	-0.213009	0.106108	-2.00748	0.044699	0.137052	6168.25	-0.252167	0.147599	-1.70846	0.0875501	0.358891
ENSG00000205922	390874	MIRT515751	hsa-mir-10b-5p	Homo sapiens	ONECUT3	Homo sapiens	PAR-CLIP	Functional MTI (Weak)	23446348	NA	NA	6.98023	-1.03514	0.784008	-1.32032	0.186728	0.378694	NA	NA	NA	NA	NA	NA
ENSG00000211584	55652	MIRT761172	hsa-mir-10b-5p	Homo sapiens	SLC48A1	Homo sapiens	PAR-CLIP	Functional MTI (Weak)	27292025	SLC48A1	12	450.011	-0.259965	0.161339	-1.61129	0.107116	0.258209	622.53	0.313887	0.291047	1.07848	0.280821	0.613127
ENSG00000213064	375035	MIRT680409	hsa-mir-10b-5p	Homo sapiens	SFT2D2	Homo sapiens	HITS-CLIP	Functional MTI (Weak)	23824327	SFT2D2	1	4160.06	-0.316979	0.124971	-2.53641	0.0111995	0.0480022	3816.3	0.115297	0.189102	0.609711	0.542054	0.802368
ENSG00000213859	147040	MIRT506896	hsa-mir-10b-5p	Homo sapiens	KCTD11	Homo sapiens	HITS-CLIP	Functional MTI (Weak)	19536157	KCTD11	17	230.033	0.426463	0.172411	2.47353	0.0133787	0.0552413	219.098	0.122919	0.25064	0.490418	0.623838	0.848577
ENSG00000213859	147040	MIRT506896	hsa-mir-10b-5p	Homo sapiens	KCTD11	Homo sapiens	HITS-CLIP	Functional MTI (Weak)	23313552	KCTD11	17	230.033	0.426463	0.172411	2.47353	0.0133787	0.0552413	219.098	0.122919	0.25064	0.490418	0.623838	0.848577
ENSG00000213859	147040	MIRT506896	hsa-mir-10b-5p	Homo sapiens	KCTD11	Homo sapiens	PAR-CLIP	Functional MTI (Weak)	23446348	KCTD11	17	230.033	0.426463	0.172411	2.47353	0.0133787	0.0552413	219.098	0.122919	0.25064	0.490418	0.623838	0.848577
ENSG00000213859	147040	MIRT506896	hsa-mir-10b-5p	Homo sapiens	KCTD11	Homo sapiens	HITS-CLIP	Functional MTI (Weak)	27418678	KCTD11	17	230.033	0.426463	0.172411	2.47353	0.0133787	0.0552413	219.098	0.122919	0.25064	0.490418	0.623838	0.848577
ENSG00000213859	147040	MIRT506896	hsa-mir-10b-5p	Homo sapiens	KCTD11	Homo sapiens	HITS-CLIP	Functional MTI (Weak)	28735896	KCTD11	17	230.033	0.426463	0.172411	2.47353	0.0133787	0.0552413	219.098	0.122919	0.25064	0.490418	0.623838	0.848577
ENSG00000213859	147040	MIRT506896	hsa-mir-10b-5p	Homo sapiens	KCTD11	Homo sapiens	HITS-CLIP	Functional MTI (Weak)	23824327	KCTD11	17	230.033	0.426463	0.172411	2.47353	0.0133787	0.0552413	219.098	0.122919	0.25064	0.490418	0.623838	0.848577
ENSG00000213859	147040	MIRT506896	hsa-mir-10b-5p	Homo sapiens	KCTD11	Homo sapiens	HITS-CLIP	Functional MTI (Weak)	24906430	KCTD11	17	230.033	0.426463	0.172411	2.47353	0.0133787	0.0552413	219.098	0.122919	0.25064	0.490418	0.623838	0.848577
ENSG00000215114	137886	MIRT561371	hsa-mir-10b-3p	Homo sapiens	UBXN2B	Homo sapiens	PAR-CLIP	Functional MTI (Weak)	20371350	UBXN2B	8	1379.91	-0.189637	0.142927	-1.32681	0.184573	0.375912	2118.9	-0.342898	0.196754	-1.74278	0.0813729	0.347553
ENSG00000218336	55714	MIRT047456	hsa-mir-10b-5p	Homo sapiens	TENM3	Homo sapiens	CLASH	Functional MTI (Weak)	23622248	TENM3	4	NA	NA	NA	NA	NA	NA	NA	NA	NA	NA	NA	NA
ENSG00000222009	149478	MIRT720902	hsa-mir-10b-3p	Homo sapiens	BTBD19	Homo sapiens	HITS-CLIP	Functional MTI (Weak)	19536157	BTBD19	1	8.6239	0.231348	0.682558	0.338942	0.734653	0.85885	NA	NA	NA	NA	NA	NA
ENSG00000231256	284067	MIRT707153	hsa-mir-10b-5p	Homo sapiens	C17orf105	Homo sapiens	HITS-CLIP	Functional MTI (Weak)	21572407	NA	NA	NA	NA	NA	NA	NA	NA	NA	NA	NA	NA	NA	NA
ENSG00000231256	284067	MIRT617774	hsa-mir-10b-3p	Homo sapiens	C17orf105	Homo sapiens	HITS-CLIP	Functional MTI (Weak)	23824327	NA	NA	NA	NA	NA	NA	NA	NA	NA	NA	NA	NA	NA	NA
ENSG00000232119	28985	MIRT684397	hsa-mir-10b-5p	Homo sapiens	MCTS1	Homo sapiens	HITS-CLIP	Functional MTI (Weak)	23313552	MCTS1	X	1397.46	0.45145	0.121444	3.71737	0.000201311	0.0016999	1633.41	0.180449	0.199292	0.905452	0.365226	0.684304
ENSG00000234745	3106	MIRT486963	hsa-mir-10b-3p	Homo sapiens	HLA-B	Homo sapiens	PAR-CLIP	Functional MTI (Weak)	23592263	HLA-B	6	NA	NA	NA	NA	NA	NA	NA	NA	NA	NA	NA	NA
ENSG00000239810	440560	MIRT761159	hsa-mir-10b-3p	Homo sapiens	PRAMEF11	Homo sapiens	PAR-CLIP	Functional MTI (Weak)	27292025	PRAMEF11	1	NA	NA	NA	NA	NA	NA	NA	NA	NA	NA	NA	NA
ENSG00000239998	11027	MIRT650185	hsa-mir-10b-5p	Homo sapiens	LILRA2	Homo sapiens	HITS-CLIP	Functional MTI (Weak)	23824327	LILRA2	19	NA	NA	NA	NA	NA	NA	NA	NA	NA	NA	NA	NA
ENSG00000243073	400735	MIRT761162	hsa-mir-10b-3p	Homo sapiens	PRAMEF4	Homo sapiens	PAR-CLIP	Functional MTI (Weak)	27292025	PRAMEF4	1	NA	NA	NA	NA	NA	NA	NA	NA	NA	NA	NA	NA
ENSG00000254087	4067	MIRT473946	hsa-mir-10b-3p	Homo sapiens	LYN	Homo sapiens	PAR-CLIP	Functional MTI (Weak)	23592263	LYN	8	913.531	0.385782	0.139795	2.75962	0.00578693	0.0282968	657.074	-0.211624	0.187632	-1.12787	0.259375	0.591925
ENSG00000255112	57132	MIRT634927	hsa-mir-10b-5p	Homo sapiens	CHMP1B	Homo sapiens	PAR-CLIP	Functional MTI (Weak)	27292025	CHMP1B	18	4543.12	0.349805	0.117427	2.9789	0.00289285	0.0160127	5857.17	0.129686	0.166561	0.778612	0.436208	0.736867
ENSG00000255112	57132	MIRT634927	hsa-mir-10b-5p	Homo sapiens	CHMP1B	Homo sapiens	HITS-CLIP	Functional MTI (Weak)	23824327	CHMP1B	18	4543.12	0.349805	0.117427	2.9789	0.00289285	0.0160127	5857.17	0.129686	0.166561	0.778612	0.436208	0.736867
ENSG00000256045	100463488	MIRT535810	hsa-mir-10b-5p	Homo sapiens	MTRNR2L10	Homo sapiens	PAR-CLIP	Functional MTI (Weak)	22012620	MTRNR2L10	X	NA	NA	NA	NA	NA	NA	NA	NA	NA	NA	NA	NA
ENSG00000256045	100463488	MIRT535810	hsa-mir-10b-5p	Homo sapiens	MTRNR2L10	Homo sapiens	PAR-CLIP	Functional MTI (Weak)	20371350	MTRNR2L10	X	NA	NA	NA	NA	NA	NA	NA	NA	NA	NA	NA	NA
ENSG00000256222	100462983	MIRT525618	hsa-mir-10b-5p	Homo sapiens	MTRNR2L3	Homo sapiens	PAR-CLIP	Functional MTI (Weak)	22012620	MTRNR2L3	20	NA	NA	NA	NA	NA	NA	NA	NA	NA	NA	NA	NA
ENSG00000256222	100462983	MIRT525618	hsa-mir-10b-5p	Homo sapiens	MTRNR2L3	Homo sapiens	PAR-CLIP	Functional MTI (Weak)	20371350	MTRNR2L3	20	NA	NA	NA	NA	NA	NA	NA	NA	NA	NA	NA	NA
ENSG00000256892	100288485	MIRT525568	hsa-mir-10b-5p	Homo sapiens	MTRNR2L7	Homo sapiens	PAR-CLIP	Functional MTI (Weak)	20371350	MTRNR2L7	10	NA	NA	NA	NA	NA	NA	NA	NA	NA	NA	NA	NA
ENSG00000256892	100288485	MIRT525568	hsa-mir-10b-5p	Homo sapiens	MTRNR2L7	Homo sapiens	PAR-CLIP	Functional MTI (Weak)	21572407	MTRNR2L7	10	NA	NA	NA	NA	NA	NA	NA	NA	NA	NA	NA	NA
ENSG00000256892	100288485	MIRT525568	hsa-mir-10b-5p	Homo sapiens	MTRNR2L7	Homo sapiens	PAR-CLIP	Functional MTI (Weak)	22012620	MTRNR2L7	10	NA	NA	NA	NA	NA	NA	NA	NA	NA	NA	NA	NA
ENSG00000257446	729747	MIRT783083	hsa-mir-10b-5p	Homo sapiens	ZNF878	Homo sapiens	HITS-CLIP	Functional MTI (Weak)	27418678	ZNF878	19	74.8866	-0.388336	0.272308	-1.42609	0.153842	0.333635	83.1975	-0.269837	0.360663	-0.748169	0.454358	0.750023
ENSG00000267534	9294	MIRT514261	hsa-mir-10b-5p	Homo sapiens	S1PR2	Homo sapiens	PAR-CLIP	Functional MTI (Weak)	23446348	S1PR2	19	179.325	0.774085	0.205248	3.77145	0.000162299	0.00141203	328.29	0.0101563	0.23227	0.0437262	0.965123	0.986806
ENSG00000270188	100463489	MIRT535792	hsa-mir-10b-5p	Homo sapiens	MTRNR2L11	Homo sapiens	PAR-CLIP	Functional MTI (Weak)	22012620	NA	NA	NA	NA	NA	NA	NA	NA	NA	NA	NA	NA	NA	NA
ENSG00000270188	100463489	MIRT535792	hsa-mir-10b-5p	Homo sapiens	MTRNR2L11	Homo sapiens	PAR-CLIP	Functional MTI (Weak)	20371350	NA	NA	NA	NA	NA	NA	NA	NA	NA	NA	NA	NA	NA	NA
ENSG00000270188	100463489	MIRT535792	hsa-mir-10b-5p	Homo sapiens	MTRNR2L11	Homo sapiens	PAR-CLIP	Functional MTI (Weak)	21572407	NA	NA	NA	NA	NA	NA	NA	NA	NA	NA	NA	NA	NA	NA
ENSG00000271601	128077	MIRT708072	hsa-mir-10b-5p	Homo sapiens	LIX1L	Homo sapiens	HITS-CLIP	Functional MTI (Weak)	21572407	LIX1L	1	1321.18	-0.235346	0.143071	-1.64497	0.0999769	0.245938	1468.81	0.165686	0.169818	0.975668	0.329229	0.655851
ENSG00000275004	140883	MIRT542574	hsa-mir-10b-5p	Homo sapiens	ZNF280B	Homo sapiens	PAR-CLIP	Functional MTI (Weak)	21572407	ZNF280B	22	1405.97	-0.294133	0.129687	-2.26803	0.0233274	0.0844365	1860.25	-0.00913884	0.162935	-0.056089	0.955271	0.983152
ENSG00000276043	29128	MIRT047494	hsa-mir-10b-5p	Homo sapiens	UHRF1	Homo sapiens	CLASH	Functional MTI (Weak)	23622248	UHRF1	19	1680.58	-0.577183	0.182123	-3.1692	0.00152858	0.00947165	463.09	0.264019	0.335091	0.787902	0.430754	0.734378
ENSG00000276903	8332	MIRT047436	hsa-mir-10b-5p	Homo sapiens	HIST1H2AL	Homo sapiens	CLASH	Functional MTI (Weak)	23622248	NA	NA	7.68856	-0.451061	0.775846	-0.58138	0.560984	0.745008	NA	NA	NA	NA	NA	NA
ENSG00000280267	645359	MIRT761161	hsa-mir-10b-3p	Homo sapiens	PRAMEF26	Homo sapiens	PAR-CLIP	Functional MTI (Weak)	27292025	PRAMEF26	1	NA	NA	NA	NA	NA	NA	NA	NA	NA	NA	NA	NA
ENSG00000288547	80111	MIRT640544	hsa-mir-10b-5p	Homo sapiens	C3orf36	Homo sapiens	HITS-CLIP	Functional MTI (Weak)	23824327	NA	NA	NA	NA	NA	NA	NA	NA	NA	NA	NA	NA	NA	NA
