# Supplementary material
Source: HighWire-hosted journal article supplement (doi:10.1101/rna.080097.124)
Supplement: Supplemental_TableS14.xlsx [file Supplemental_TableS14.xlsx]

## Sheet: edited_miRNA_targets_DE
ensembl_gene_id	Target Gene (Entrez Gene ID)	miRTarBase ID	miRNA	Species (miRNA)	Target Gene	Species (Target Gene)	Experiments	Support Type	References (PMID)	hgnc_symbol	chromosome_name	baseMean_total	log2FoldChange_total	lfcSE_total	stat_total	pvalue_total	padj_total	baseMean_polysomes	log2FoldChange_polysomes	lfcSE_polysomes	stat_polysomes	pvalue_polysomes	padj_polysomes
ENSG00000007968	1870	MIRT477787	hsa-mir-3144-3p	Homo sapiens	E2F2	Homo sapiens	PAR-CLIP	Functional MTI (Weak)	23592263	E2F2	1	984.132	-0.0948152	0.137243	-0.690858	0.489655	0.687779	917.389	0.185244	0.236942	0.781812	0.434325	0.736183
ENSG00000010072	83932	MIRT565478	hsa-mir-3144-3p	Homo sapiens	SPRTN	Homo sapiens	PAR-CLIP	Functional MTI (Weak)	20371350	SPRTN	1	1670.92	-0.207994	0.124512	-1.67047	0.0948256	0.236851	1362.71	-0.268582	0.156888	-1.71193	0.08691	0.357431
ENSG00000019995	54764	MIRT571492	hsa-mir-3144-3p	Homo sapiens	ZRANB1	Homo sapiens	PAR-CLIP	Functional MTI (Weak)	20371350	ZRANB1	10	2445.83	-0.0041329	0.119174	-0.0346795	0.972335	0.987112	2990.66	-0.12063	0.196527	-0.61381	0.539341	0.800277
ENSG00000028203	55591	MIRT672825	hsa-mir-625-3p	Homo sapiens	VEZT	Homo sapiens	HITS-CLIP	Functional MTI (Weak)	23824327	VEZT	12	3372.6	-0.0836251	0.120947	-0.691419	0.489302	0.687516	5065	-0.340921	0.185707	-1.8358	0.0663869	0.313362
ENSG00000047365	116984	MIRT481663	hsa-mir-3144-3p	Homo sapiens	ARAP2	Homo sapiens	PAR-CLIP	Functional MTI (Weak)	23592263	ARAP2	4	NA	NA	NA	NA	NA	NA	NA	NA	NA	NA	NA	NA
ENSG00000048649	51773	MIRT447006	hsa-mir-561-5p	Homo sapiens	RSF1	Homo sapiens	PAR-CLIP	Functional MTI (Weak)	22100165	RSF1	11	2675.12	0.282539	0.137421	2.05602	0.039781	0.125299	1132.13	-0.874108	0.205295	-4.25782	2.06428e-05	0.00196866
ENSG00000050405	51474	MIRT536284	hsa-mir-3144-3p	Homo sapiens	LIMA1	Homo sapiens	PAR-CLIP	Functional MTI (Weak)	22012620	LIMA1	12	2357.36	-0.0660492	0.12057	-0.54781	0.583822	0.761973	795.327	-0.520925	0.234881	-2.21782	0.0265668	0.189971
ENSG00000054118	9967	MIRT563708	hsa-mir-625-3p	Homo sapiens	THRAP3	Homo sapiens	PAR-CLIP	Functional MTI (Weak)	20371350	THRAP3	1	14671.8	0.0434528	0.102652	0.423301	0.672076	0.819714	4681.37	0.0482148	0.220063	0.219096	0.826575	0.938407
ENSG00000075785	7879	MIRT490712	hsa-mir-561-5p	Homo sapiens	RAB7A	Homo sapiens	PAR-CLIP	Functional MTI (Weak)	23592263	RAB7A	3	11153.5	0.046122	0.110661	0.416786	0.676835	0.823601	9377.75	0.358606	0.192496	1.86293	0.0624718	0.303582
ENSG00000075785	7879	MIRT490712	hsa-mir-561-5p	Homo sapiens	RAB7A	Homo sapiens	PAR-CLIP	Functional MTI (Weak)	20371350	RAB7A	3	11153.5	0.046122	0.110661	0.416786	0.676835	0.823601	9377.75	0.358606	0.192496	1.86293	0.0624718	0.303582
ENSG00000075785	7879	MIRT490712	hsa-mir-561-5p	Homo sapiens	RAB7A	Homo sapiens	PAR-CLIP	Functional MTI (Weak)	26701625	RAB7A	3	11153.5	0.046122	0.110661	0.416786	0.676835	0.823601	9377.75	0.358606	0.192496	1.86293	0.0624718	0.303582
ENSG00000076053	10179	MIRT546792	hsa-mir-3144-3p	Homo sapiens	RBM7	Homo sapiens	PAR-CLIP	Functional MTI (Weak)	21572407	RBM7	11	827.695	0.300734	0.13986	2.15025	0.0315356	0.10521	1246.85	-0.0898214	0.154989	-0.579535	0.562228	0.814892
ENSG00000076108	11176	MIRT481046	hsa-mir-3144-3p	Homo sapiens	BAZ2A	Homo sapiens	PAR-CLIP	Functional MTI (Weak)	23592263	BAZ2A	12	14861.9	0.0947032	0.117939	0.802982	0.421985	0.632816	5357.71	-0.436093	0.162272	-2.68743	0.00720052	0.0883149
ENSG00000077782	2260	MIRT625522	hsa-mir-561-5p	Homo sapiens	FGFR1	Homo sapiens	HITS-CLIP	Functional MTI (Weak)	23824327	FGFR1	8	2716.37	-0.216555	0.12365	-1.75135	0.0798856	0.209927	1677	0.30701	0.169354	1.81282	0.0698589	0.322961
ENSG00000080854	22997	MIRT694587	hsa-mir-625-3p	Homo sapiens	IGSF9B	Homo sapiens	HITS-CLIP	Functional MTI (Weak)	23313552	IGSF9B	11	NA	NA	NA	NA	NA	NA	NA	NA	NA	NA	NA	NA
ENSG00000088179	5775	MIRT534918	hsa-mir-3144-3p	Homo sapiens	PTPN4	Homo sapiens	PAR-CLIP	Functional MTI (Weak)	22012620	PTPN4	2	1293.15	0.311428	0.13672	2.27785	0.0227353	0.0826516	1087.21	-0.146578	0.170333	-0.86054	0.389492	0.705501
ENSG00000088832	2280	MIRT557840	hsa-mir-561-5p	Homo sapiens	FKBP1A	Homo sapiens	PAR-CLIP	Functional MTI (Weak)	21572407	FKBP1A	20	6951.97	0.192211	0.121843	1.57752	0.114676	0.271461	13847	0.150149	0.17965	0.835784	0.403276	0.716608
ENSG00000089234	8315	MIRT559173	hsa-mir-561-5p	Homo sapiens	BRAP	Homo sapiens	PAR-CLIP	Functional MTI (Weak)	21572407	BRAP	12	1947.8	-0.0238241	0.114918	-0.207314	0.835764	0.919618	1518.75	-0.22292	0.146969	-1.51679	0.129321	0.438973
ENSG00000099194	6319	MIRT571668	hsa-mir-625-3p	Homo sapiens	SCD	Homo sapiens	PAR-CLIP	Functional MTI (Weak)	20371350	SCD	10	213197	0.492513	0.115086	4.27951	1.87308e-05	0.000217238	112082	-0.498385	0.182979	-2.72373	0.00645496	0.0822982
ENSG00000099246	22931	MIRT534826	hsa-mir-561-5p	Homo sapiens	RAB18	Homo sapiens	PAR-CLIP	Functional MTI (Weak)	22012620	RAB18	10	2650.77	0.198916	0.140553	1.41524	0.156998	0.338092	2915.02	0.0259499	0.225386	0.115135	0.908338	0.965844
ENSG00000100219	7494	MIRT037784	hsa-mir-625-3p	Homo sapiens	XBP1	Homo sapiens	CLASH	Functional MTI (Weak)	23622248	XBP1	22	28680.3	0.314577	0.120707	2.60613	0.00915728	0.0409303	45867.7	-0.0201659	0.201631	-0.100014	0.920333	0.969232
ENSG00000100644	3091	MIRT702961	hsa-mir-625-3p	Homo sapiens	HIF1A	Homo sapiens	HITS-CLIP	Functional MTI (Weak)	23313552	HIF1A	14	12573.7	-0.0631018	0.126174	-0.500119	0.616992	0.785122	5127.87	-0.418418	0.211603	-1.97738	0.047999	0.265414
ENSG00000101266	1457	MIRT538302	hsa-mir-625-3p	Homo sapiens	CSNK2A1	Homo sapiens	PAR-CLIP	Functional MTI (Weak)	22012620	CSNK2A1	20	8769.56	0.0119551	0.111894	0.106842	0.914914	0.959331	6179.66	-0.232228	0.169581	-1.36942	0.170867	0.494343
ENSG00000103381	55313	MIRT788140	hsa-mir-625-3p	Homo sapiens	CPPED1	Homo sapiens	HITS-CLIP	Functional MTI (Weak)	27418678	CPPED1	16	1515.91	-0.329076	0.116454	-2.8258	0.00471622	0.0239409	1145.75	-0.0939088	0.240446	-0.390562	0.696121	0.885269
ENSG00000103490	29108	MIRT650288	hsa-mir-561-5p	Homo sapiens	PYCARD	Homo sapiens	HITS-CLIP	Functional MTI (Weak)	23824327	PYCARD	16	NA	NA	NA	NA	NA	NA	NA	NA	NA	NA	NA	NA
ENSG00000105810	1021	MIRT104455	hsa-mir-561-5p	Homo sapiens	CDK6	Homo sapiens	PAR-CLIP	Functional MTI (Weak)	21572407	CDK6	7	3700.53	-0.149348	0.135331	-1.10357	0.269779	0.481419	2113.87	-0.167619	0.220049	-0.761734	0.446219	0.745116
ENSG00000105991	3198	MIRT529275	hsa-mir-561-5p	Homo sapiens	HOXA1	Homo sapiens	PAR-CLIP	Functional MTI (Weak)	22012620	HOXA1	7	114.545	-0.292894	0.214827	-1.36339	0.172759	0.360195	225.37	-0.210368	0.40854	-0.514927	0.606604	0.83988
ENSG00000106537	27075	MIRT545480	hsa-mir-3144-3p	Homo sapiens	TSPAN13	Homo sapiens	PAR-CLIP	Functional MTI (Weak)	20371350	TSPAN13	7	5706.44	0.421148	0.143837	2.92796	0.00341193	0.0183656	5075.41	0.320267	0.271725	1.17864	0.238541	0.573352
ENSG00000106537	27075	MIRT545480	hsa-mir-3144-3p	Homo sapiens	TSPAN13	Homo sapiens	PAR-CLIP	Functional MTI (Weak)	21572407	TSPAN13	7	5706.44	0.421148	0.143837	2.92796	0.00341193	0.0183656	5075.41	0.320267	0.271725	1.17864	0.238541	0.573352
ENSG00000106636	10652	MIRT751098	hsa-mir-561-5p	Homo sapiens	YKT6	Homo sapiens	PAR-CLIP	Functional MTI (Weak)	26701625	YKT6	7	4319.52	-0.126463	0.106502	-1.18742	0.23506	0.440073	4480.76	0.300564	0.185115	1.62366	0.104448	0.392142
ENSG00000106692	2218	MIRT776108	hsa-mir-625-3p	Homo sapiens	FKTN	Homo sapiens	PAR-CLIP	Functional MTI (Weak)	27292025	FKTN	9	2817.83	0.0771638	0.134214	0.574931	0.565338	0.747785	2161.59	-0.282314	0.16353	-1.72637	0.0842807	0.352593
ENSG00000107263	2889	MIRT492479	hsa-mir-561-5p	Homo sapiens	RAPGEF1	Homo sapiens	PAR-CLIP	Functional MTI (Weak)	23592263	RAPGEF1	9	4743.56	-0.281682	0.115976	-2.42879	0.0151492	0.060696	4734.76	-0.14593	0.213227	-0.684387	0.493731	0.774587
ENSG00000107957	9644	MIRT713674	hsa-mir-561-5p	Homo sapiens	SH3PXD2A	Homo sapiens	HITS-CLIP	Functional MTI (Weak)	19536157	SH3PXD2A	10	6896.15	0.172891	0.120163	1.4388	0.150207	0.328144	2645.57	-0.279278	0.234369	-1.19161	0.233413	0.568133
ENSG00000108984	5608	MIRT732300	hsa-mir-625-3p	Homo sapiens	MAP2K6	Homo sapiens	Luciferase reporter assay//qRT-PCR//Western blot	Functional MTI	27526785	MAP2K6	17	868.199	-0.0894016	0.14459	-0.618313	0.536369	0.725348	688.277	0.0416604	0.176573	0.235939	0.81348	0.934394
ENSG00000109971	3312	MIRT752576	hsa-mir-625-3p	Homo sapiens	HSPA8	Homo sapiens	PAR-CLIP	Functional MTI (Weak)	26701625	HSPA8	11	101169	-0.155657	0.166542	-0.934638	0.349975	0.564571	49132.6	-0.431309	0.240899	-1.79042	0.0733867	0.331691
ENSG00000110583	79829	MIRT515859	hsa-mir-561-5p	Homo sapiens	NAA40	Homo sapiens	PAR-CLIP	Functional MTI (Weak)	23446348	NAA40	11	2682.6	-0.000406692	0.11417	-0.00356215	0.997158	0.999159	2382.9	0.645695	0.242475	2.66293	0.00774627	0.0928082
ENSG00000112096	6648	MIRT525791	hsa-mir-561-5p	Homo sapiens	SOD2	Homo sapiens	PAR-CLIP	Functional MTI (Weak)	22012620	SOD2	6	10492	-0.648992	0.11569	-5.60973	2.02648e-08	4.60054e-07	8013.76	0.084187	0.203372	0.413956	0.678906	0.877464
ENSG00000112096	6648	MIRT514691	hsa-mir-3144-3p	Homo sapiens	SOD2	Homo sapiens	PAR-CLIP	Functional MTI (Weak)	23446348	SOD2	6	10492	-0.648992	0.11569	-5.60973	2.02648e-08	4.60054e-07	8013.76	0.084187	0.203372	0.413956	0.678906	0.877464
ENSG00000112294	7915	MIRT717841	hsa-mir-561-5p	Homo sapiens	ALDH5A1	Homo sapiens	HITS-CLIP	Functional MTI (Weak)	19536157	ALDH5A1	6	1903.21	-0.264473	0.113571	-2.32869	0.0198754	0.074603	762.816	-0.235568	0.218091	-1.08013	0.280082	0.612542
ENSG00000112333	7101	MIRT625926	hsa-mir-561-5p	Homo sapiens	NR2E1	Homo sapiens	HITS-CLIP	Functional MTI (Weak)	23824327	NR2E1	6	NA	NA	NA	NA	NA	NA	NA	NA	NA	NA	NA	NA
ENSG00000112333	7101	MIRT625926	hsa-mir-561-5p	Homo sapiens	NR2E1	Homo sapiens	HITS-CLIP	Functional MTI (Weak)	27418678	NR2E1	6	NA	NA	NA	NA	NA	NA	NA	NA	NA	NA	NA	NA
ENSG00000112697	55754	MIRT553499	hsa-mir-3144-3p	Homo sapiens	TMEM30A	Homo sapiens	PAR-CLIP	Functional MTI (Weak)	21572407	TMEM30A	6	8462.58	-0.0181241	0.131471	-0.137856	0.890354	0.947251	5051.53	0.100542	0.201467	0.499052	0.617743	0.84443
ENSG00000113966	84100	MIRT764989	hsa-mir-3144-3p	Homo sapiens	ARL6	Homo sapiens	PAR-CLIP	Functional MTI (Weak)	27292025	ARL6	3	349.533	0.34396	0.162482	2.11692	0.034267	0.112103	332.94	0.0741507	0.213633	0.347094	0.728521	0.898067
ENSG00000114520	8723	MIRT554073	hsa-mir-3144-3p	Homo sapiens	SNX4	Homo sapiens	PAR-CLIP	Functional MTI (Weak)	21572407	SNX4	3	2625.54	-0.0288713	0.121696	-0.237241	0.81247	0.906	2708.63	-0.180989	0.156736	-1.15474	0.248197	0.582
ENSG00000114520	8723	MIRT554073	hsa-mir-3144-3p	Homo sapiens	SNX4	Homo sapiens	PAR-CLIP	Functional MTI (Weak)	20371350	SNX4	3	2625.54	-0.0288713	0.121696	-0.237241	0.81247	0.906	2708.63	-0.180989	0.156736	-1.15474	0.248197	0.582
ENSG00000115461	3488	MIRT567170	hsa-mir-625-3p	Homo sapiens	IGFBP5	Homo sapiens	PAR-CLIP	Functional MTI (Weak)	20371350	IGFBP5	2	NA	NA	NA	NA	NA	NA	NA	NA	NA	NA	NA	NA
ENSG00000116396	3749	MIRT567029	hsa-mir-625-3p	Homo sapiens	KCNC4	Homo sapiens	PAR-CLIP	Functional MTI (Weak)	20371350	KCNC4	1	421.631	0.18884	0.149362	1.26432	0.206117	0.403834	263.756	-0.0528788	0.265132	-0.199443	0.841916	0.941605
ENSG00000116903	149371	MIRT562350	hsa-mir-625-3p	Homo sapiens	EXOC8	Homo sapiens	PAR-CLIP	Functional MTI (Weak)	20371350	EXOC8	1	2502.06	-0.0869683	0.110506	-0.787004	0.43128	0.640029	2510.76	-0.197959	0.238396	-0.830376	0.406326	0.718843
ENSG00000117713	8289	MIRT066796	hsa-mir-561-5p	Homo sapiens	ARID1A	Homo sapiens	PAR-CLIP	Functional MTI (Weak)	23592263	ARID1A	1	7625.83	-0.142775	0.103371	-1.38119	0.16722	0.351713	2904.56	-0.262554	0.188871	-1.39013	0.164491	0.488026
ENSG00000118898	5493	MIRT654868	hsa-mir-561-5p	Homo sapiens	PPL	Homo sapiens	HITS-CLIP	Functional MTI (Weak)	23824327	PPL	16	342.931	-0.103271	0.506863	-0.203746	0.838552	0.920938	78.7329	-0.0911081	0.931797	-0.0977768	0.92211	0.969996
ENSG00000118939	7347	MIRT520275	hsa-mir-3144-3p	Homo sapiens	UCHL3	Homo sapiens	PAR-CLIP	Functional MTI (Weak)	23446348	UCHL3	13	619.917	-0.179696	0.134246	-1.33856	0.180714	0.370507	994.194	0.217306	0.22637	0.959958	0.337077	0.662168
ENSG00000118939	7347	MIRT520275	hsa-mir-3144-3p	Homo sapiens	UCHL3	Homo sapiens	PAR-CLIP	Functional MTI (Weak)	21572407	UCHL3	13	619.917	-0.179696	0.134246	-1.33856	0.180714	0.370507	994.194	0.217306	0.22637	0.959958	0.337077	0.662168
ENSG00000119318	5887	MIRT364274	hsa-mir-3144-3p	Homo sapiens	RAD23B	Homo sapiens	PAR-CLIP//HITS-CLIP	Functional MTI (Weak)	21572407	RAD23B	9	20855.4	-0.388869	0.112114	-3.4685	0.000523375	0.003848	21663.8	-0.228812	0.183306	-1.24825	0.211939	0.547377
ENSG00000121039	157506	MIRT675755	hsa-mir-561-5p	Homo sapiens	RDH10	Homo sapiens	HITS-CLIP	Functional MTI (Weak)	23824327	RDH10	8	2084.8	0.602427	0.135078	4.45984	8.20208e-06	0.000104683	1635.72	-0.0303263	0.249567	-0.121516	0.903283	0.96345
ENSG00000125633	54520	MIRT636668	hsa-mir-561-5p	Homo sapiens	CCDC93	Homo sapiens	HITS-CLIP	Functional MTI (Weak)	23824327	CCDC93	2	5115.13	-0.30984	0.120984	-2.56099	0.0104373	0.0454246	2077.33	-0.682846	0.229634	-2.97362	0.00294306	0.0503198
ENSG00000127329	5787	MIRT641048	hsa-mir-561-5p	Homo sapiens	PTPRB	Homo sapiens	HITS-CLIP	Functional MTI (Weak)	23824327	PTPRB	12	47.9858	0.0489673	0.353557	0.138499	0.889846	0.947041	NA	NA	NA	NA	NA	NA
ENSG00000129103	25870	MIRT453071	hsa-mir-561-5p	Homo sapiens	SUMF2	Homo sapiens	PAR-CLIP	Functional MTI (Weak)	23592263	SUMF2	7	6577.38	0.149918	0.104223	1.43844	0.15031	0.32833	6088.98	0.257863	0.184689	1.3962	0.162655	0.48509
ENSG00000129103	25870	MIRT453071	hsa-mir-561-5p	Homo sapiens	SUMF2	Homo sapiens	PAR-CLIP	Functional MTI (Weak)	20371350	SUMF2	7	6577.38	0.149918	0.104223	1.43844	0.15031	0.32833	6088.98	0.257863	0.184689	1.3962	0.162655	0.48509
ENSG00000129103	25870	MIRT453071	hsa-mir-561-5p	Homo sapiens	SUMF2	Homo sapiens	PAR-CLIP	Functional MTI (Weak)	21572407	SUMF2	7	6577.38	0.149918	0.104223	1.43844	0.15031	0.32833	6088.98	0.257863	0.184689	1.3962	0.162655	0.48509
ENSG00000130544	79230	MIRT560101	hsa-mir-3144-3p	Homo sapiens	ZNF557	Homo sapiens	PAR-CLIP	Functional MTI (Weak)	20371350	ZNF557	19	561.981	-0.60351	0.140373	-4.29932	1.7132e-05	0.000200411	535.291	-0.166759	0.268149	-0.62189	0.534014	0.798334
ENSG00000131153	51659	MIRT677709	hsa-mir-625-3p	Homo sapiens	GINS2	Homo sapiens	HITS-CLIP	Functional MTI (Weak)	23824327	GINS2	16	2072.32	-0.194024	0.108501	-1.78822	0.0737412	0.197881	3042.82	0.182084	0.206269	0.88275	0.377372	0.695682
ENSG00000132182	23225	MIRT701266	hsa-mir-561-5p	Homo sapiens	NUP210	Homo sapiens	HITS-CLIP	Functional MTI (Weak)	23313552	NUP210	3	12649	-0.288108	0.139456	-2.06594	0.0388342	0.123204	4088.27	-0.150797	0.241501	-0.624415	0.532355	0.797394
ENSG00000132313	51318	MIRT407776	hsa-mir-3144-3p	Homo sapiens	MRPL35	Homo sapiens	PAR-CLIP	Functional MTI (Weak)	20371350	MRPL35	2	2738.45	-0.224494	0.121988	-1.8403	0.0657246	0.182039	3374.67	0.130907	0.211235	0.619723	0.53544	0.798944
ENSG00000133477	113828	MIRT720246	hsa-mir-561-5p	Homo sapiens	FAM83F	Homo sapiens	HITS-CLIP	Functional MTI (Weak)	19536157	FAM83F	22	NA	NA	NA	NA	NA	NA	NA	NA	NA	NA	NA	NA
ENSG00000134215	10451	MIRT686342	hsa-mir-561-5p	Homo sapiens	VAV3	Homo sapiens	HITS-CLIP	Functional MTI (Weak)	23313552	VAV3	1	1490.54	-0.571752	0.125254	-4.56475	5.00089e-06	6.72867e-05	1216.57	-0.327027	0.225106	-1.45277	0.146288	0.463878
ENSG00000134318	9475	MIRT707468	hsa-mir-625-3p	Homo sapiens	ROCK2	Homo sapiens	HITS-CLIP	Functional MTI (Weak)	21572407	ROCK2	2	6654.81	0.181735	0.135041	1.34577	0.178376	0.368013	2629.32	-1.1242	0.215681	-5.21234	1.86478e-07	0.000117269
ENSG00000135473	9924	MIRT655418	hsa-mir-3144-3p	Homo sapiens	PAN2	Homo sapiens	HITS-CLIP	Functional MTI (Weak)	23824327	PAN2	12	4143.74	0.662146	0.109098	6.06927	1.28491e-09	3.66439e-08	1028.39	-0.231245	0.217606	-1.06268	0.287928	0.619812
ENSG00000136104	79621	MIRT457837	hsa-mir-561-5p	Homo sapiens	RNASEH2B	Homo sapiens	PAR-CLIP	Functional MTI (Weak)	23592263	RNASEH2B	13	896.988	-0.211567	0.127862	-1.65465	0.0979947	0.242459	1388.9	0.137822	0.235618	0.584937	0.55859	0.812023
ENSG00000136104	79621	MIRT457837	hsa-mir-561-5p	Homo sapiens	RNASEH2B	Homo sapiens	PAR-CLIP	Functional MTI (Weak)	24398324	RNASEH2B	13	896.988	-0.211567	0.127862	-1.65465	0.0979947	0.242459	1388.9	0.137822	0.235618	0.584937	0.55859	0.812023
ENSG00000137076	7094	MIRT647876	hsa-mir-561-5p	Homo sapiens	TLN1	Homo sapiens	HITS-CLIP	Functional MTI (Weak)	23824327	TLN1	9	25099.2	-0.188067	0.123709	-1.52024	0.128452	0.293791	3242.59	-0.180573	0.277698	-0.650249	0.515531	0.787392
ENSG00000138495	10063	MIRT612009	hsa-mir-3144-3p	Homo sapiens	COX17	Homo sapiens	HITS-CLIP	Functional MTI (Weak)	23824327	COX17	3	1145.35	-0.168595	0.120021	-1.40471	0.160108	0.342162	4947.5	0.127055	0.248642	0.510996	0.609354	0.840771
ENSG00000140090	123041	MIRT512763	hsa-mir-561-5p	Homo sapiens	SLC24A4	Homo sapiens	PAR-CLIP	Functional MTI (Weak)	23446348	SLC24A4	14	NA	NA	NA	NA	NA	NA	NA	NA	NA	NA	NA	NA
ENSG00000140526	11057	MIRT705976	hsa-mir-561-5p	Homo sapiens	ABHD2	Homo sapiens	HITS-CLIP	Functional MTI (Weak)	23313552	ABHD2	15	9266.61	0.699189	0.111239	6.28548	3.26847e-10	1.00889e-08	3416.65	-0.367596	0.209791	-1.7522	0.0797397	0.34583
ENSG00000142208	207	MIRT543156	hsa-mir-625-3p	Homo sapiens	AKT1	Homo sapiens	PAR-CLIP	Functional MTI (Weak)	21572407	AKT1	14	3432.86	0.18218	0.14834	1.22812	0.219401	0.420355	3898.04	0.313048	0.240926	1.29936	0.193822	0.525172
ENSG00000143149	223	MIRT483741	hsa-mir-561-5p	Homo sapiens	ALDH9A1	Homo sapiens	PAR-CLIP	Functional MTI (Weak)	23592263	ALDH9A1	1	2863.16	-0.36646	0.122499	-2.99155	0.00277567	0.015485	1415.78	-0.792035	0.18242	-4.34183	1.413e-05	0.00158934
ENSG00000143772	3707	MIRT774891	hsa-mir-561-5p	Homo sapiens	ITPKB	Homo sapiens	PAR-CLIP	Functional MTI (Weak)	27292025	ITPKB	1	NA	NA	NA	NA	NA	NA	NA	NA	NA	NA	NA	NA
ENSG00000144026	84874	MIRT442297	hsa-mir-625-3p	Homo sapiens	ZNF514	Homo sapiens	PAR-CLIP	Functional MTI (Weak)	22100165	ZNF514	2	385.847	0.210429	0.166138	1.26659	0.205302	0.402848	307.869	-0.0813923	0.269098	-0.302463	0.762299	0.911725
ENSG00000145901	10318	MIRT518708	hsa-mir-625-3p	Homo sapiens	TNIP1	Homo sapiens	PAR-CLIP	Functional MTI (Weak)	23446348	TNIP1	5	2255.89	0.196115	0.116373	1.68522	0.0919454	0.232056	2431.88	-0.104838	0.184268	-0.568941	0.569396	0.820326
ENSG00000145901	10318	MIRT518708	hsa-mir-625-3p	Homo sapiens	TNIP1	Homo sapiens	PAR-CLIP//HITS-CLIP	Functional MTI (Weak)	21572407	TNIP1	5	2255.89	0.196115	0.116373	1.68522	0.0919454	0.232056	2431.88	-0.104838	0.184268	-0.568941	0.569396	0.820326
ENSG00000146678	3484	MIRT707557	hsa-mir-625-3p	Homo sapiens	IGFBP1	Homo sapiens	HITS-CLIP	Functional MTI (Weak)	21572407	IGFBP1	7	7.77774	-1.89381	0.859285	-2.20394	0.0275287	0.0953768	NA	NA	NA	NA	NA	NA
ENSG00000146731	908	MIRT558873	hsa-mir-625-3p	Homo sapiens	CCT6A	Homo sapiens	PAR-CLIP	Functional MTI (Weak)	21572407	CCT6A	7	39406.3	-0.143971	0.110004	-1.30877	0.190612	0.383768	22445.4	-0.625451	0.199396	-3.13672	0.00170846	0.037048
ENSG00000147224	5631	MIRT774892	hsa-mir-561-5p	Homo sapiens	PRPS1	Homo sapiens	PAR-CLIP	Functional MTI (Weak)	27292025	PRPS1	X	4731.15	-0.101734	0.114069	-0.891861	0.372467	0.586131	3826.61	0.133963	0.160755	0.83334	0.404653	0.717741
ENSG00000147421	79618	MIRT536826	hsa-mir-561-5p	Homo sapiens	HMBOX1	Homo sapiens	PAR-CLIP	Functional MTI (Weak)	22012620	HMBOX1	8	1046.71	0.0869913	0.132573	0.656177	0.511711	0.705667	432.605	0.260113	0.199911	1.30114	0.193209	0.524744
ENSG00000148153	58493	MIRT536661	hsa-mir-625-3p	Homo sapiens	INIP	Homo sapiens	PAR-CLIP	Functional MTI (Weak)	22012620	INIP	9	1778.07	-0.636893	0.130704	-4.87277	1.10042e-06	1.75742e-05	2088.98	-0.0934713	0.220473	-0.423957	0.671597	0.873877
ENSG00000148153	58493	MIRT774890	hsa-mir-561-5p	Homo sapiens	INIP	Homo sapiens	PAR-CLIP	Functional MTI (Weak)	27292025	INIP	9	1778.07	-0.636893	0.130704	-4.87277	1.10042e-06	1.75742e-05	2088.98	-0.0934713	0.220473	-0.423957	0.671597	0.873877
ENSG00000148200	2649	MIRT751097	hsa-mir-561-5p	Homo sapiens	NR6A1	Homo sapiens	PAR-CLIP	Functional MTI (Weak)	26701625	NR6A1	9	5264.99	0.0333423	0.143719	0.231996	0.816541	0.908201	5373.47	-0.0770866	0.214973	-0.358586	0.719904	0.894755
ENSG00000148450	22921	MIRT662808	hsa-mir-561-5p	Homo sapiens	MSRB2	Homo sapiens	HITS-CLIP	Functional MTI (Weak)	23824327	MSRB2	10	817.089	0.132944	0.126586	1.05023	0.293614	0.507769	1278.18	0.105264	0.187819	0.560458	0.575167	0.823953
ENSG00000149212	143686	MIRT561617	hsa-mir-561-5p	Homo sapiens	SESN3	Homo sapiens	PAR-CLIP	Functional MTI (Weak)	20371350	SESN3	11	3656.41	0.132873	0.139696	0.951157	0.341524	0.556526	3097.97	-0.384559	0.144447	-2.66228	0.00776141	0.0928082
ENSG00000149218	23052	MIRT484313	hsa-mir-625-3p	Homo sapiens	ENDOD1	Homo sapiens	PAR-CLIP	Functional MTI (Weak)	23592263	ENDOD1	11	154.183	1.02033	0.199939	5.10323	3.33903e-07	5.86277e-06	137.228	-0.190051	0.274822	-0.691544	0.489224	0.771505
ENSG00000149218	23052	MIRT484313	hsa-mir-625-3p	Homo sapiens	ENDOD1	Homo sapiens	HITS-CLIP	Functional MTI (Weak)	21572407	ENDOD1	11	154.183	1.02033	0.199939	5.10323	3.33903e-07	5.86277e-06	137.228	-0.190051	0.274822	-0.691544	0.489224	0.771505
ENSG00000149311	472	MIRT052661	hsa-mir-3144-3p	Homo sapiens	ATM	Homo sapiens	CLASH	Functional MTI (Weak)	23622248	ATM	11	8339.34	0.233634	0.121401	1.92449	0.0542932	0.157982	2409.73	-0.546535	0.232164	-2.3541	0.0185678	0.156256
ENSG00000151718	80014	MIRT665374	hsa-mir-561-5p	Homo sapiens	WWC2	Homo sapiens	HITS-CLIP	Functional MTI (Weak)	23824327	WWC2	4	1874.89	0.166101	0.133137	1.24759	0.21218	0.411369	1247.69	-0.421425	0.209469	-2.01188	0.044233	0.253227
ENSG00000152402	2977	MIRT486339	hsa-mir-625-3p	Homo sapiens	GUCY1A2	Homo sapiens	PAR-CLIP	Functional MTI (Weak)	23592263	GUCY1A2	11	196.447	-0.0330932	0.209643	-0.157855	0.874571	0.939714	105.093	0.337917	0.364351	0.927447	0.353695	0.674865
ENSG00000153006	285672	MIRT467136	hsa-mir-561-5p	Homo sapiens	SREK1IP1	Homo sapiens	PAR-CLIP	Functional MTI (Weak)	23592263	SREK1IP1	5	1049.99	0.00324766	0.146656	0.0221447	0.982333	0.991728	1441.21	-0.177576	0.166486	-1.06661	0.286148	0.617895
ENSG00000156030	91748	MIRT477458	hsa-mir-3144-3p	Homo sapiens	ELMSAN1	Homo sapiens	PAR-CLIP	Functional MTI (Weak)	23592263	ELMSAN1	14	2100.44	0.0985221	0.128003	0.769687	0.441486	0.649084	1266.2	-0.0766939	0.187653	-0.408701	0.682759	0.879064
ENSG00000156735	9530	MIRT224982	hsa-mir-625-3p	Homo sapiens	BAG4	Homo sapiens	PAR-CLIP	Functional MTI (Weak)	24398324	BAG4	8	3077.17	0.184464	0.118466	1.55711	0.119445	0.27942	3592.13	-0.257025	0.191219	-1.34414	0.178904	0.506669
ENSG00000157800	84255	MIRT534213	hsa-mir-561-5p	Homo sapiens	SLC37A3	Homo sapiens	PAR-CLIP	Functional MTI (Weak)	22012620	SLC37A3	7	2077.78	-0.0501518	0.122873	-0.408161	0.683156	0.827846	2142.41	0.211812	0.14715	1.43942	0.15003	0.469821
ENSG00000157800	84255	MIRT534213	hsa-mir-561-5p	Homo sapiens	SLC37A3	Homo sapiens	PAR-CLIP	Functional MTI (Weak)	20371350	SLC37A3	7	2077.78	-0.0501518	0.122873	-0.408161	0.683156	0.827846	2142.41	0.211812	0.14715	1.43942	0.15003	0.469821
ENSG00000158042	63875	MIRT678615	hsa-mir-625-3p	Homo sapiens	MRPL17	Homo sapiens	HITS-CLIP	Functional MTI (Weak)	23824327	MRPL17	11	2326.32	0.0321934	0.115046	0.279829	0.779609	0.886581	3562.27	0.181798	0.186391	0.975359	0.329382	0.656049
ENSG00000158470	9334	MIRT568339	hsa-mir-561-5p	Homo sapiens	B4GALT5	Homo sapiens	PAR-CLIP	Functional MTI (Weak)	20371350	B4GALT5	20	3304.73	-0.0215081	0.106711	-0.201555	0.840265	0.921992	3233.57	0.159409	0.223728	0.712514	0.476146	0.762617
ENSG00000158859	9507	MIRT516414	hsa-mir-3144-3p	Homo sapiens	ADAMTS4	Homo sapiens	PAR-CLIP	Functional MTI (Weak)	23446348	ADAMTS4	1	NA	NA	NA	NA	NA	NA	NA	NA	NA	NA	NA	NA
ENSG00000158859	9507	MIRT516414	hsa-mir-3144-3p	Homo sapiens	ADAMTS4	Homo sapiens	HITS-CLIP	Functional MTI (Weak)	23824327	ADAMTS4	1	NA	NA	NA	NA	NA	NA	NA	NA	NA	NA	NA	NA
ENSG00000160710	103	MIRT774889	hsa-mir-561-5p	Homo sapiens	ADAR	Homo sapiens	PAR-CLIP	Functional MTI (Weak)	27292025	ADAR	1	18112.7	-1.78906	0.112601	-15.8885	7.61642e-57	4.51236e-54	9324.34	-0.172512	0.199609	-0.86425	0.38745	0.70443
ENSG00000162367	6886	MIRT516188	hsa-mir-561-5p	Homo sapiens	TAL1	Homo sapiens	PAR-CLIP	Functional MTI (Weak)	20371350	TAL1	1	NA	NA	NA	NA	NA	NA	NA	NA	NA	NA	NA	NA
ENSG00000162367	6886	MIRT516188	hsa-mir-561-5p	Homo sapiens	TAL1	Homo sapiens	PAR-CLIP	Functional MTI (Weak)	23446348	TAL1	1	NA	NA	NA	NA	NA	NA	NA	NA	NA	NA	NA	NA
ENSG00000162407	8613	MIRT678365	hsa-mir-625-3p	Homo sapiens	PLPP3	Homo sapiens	HITS-CLIP	Functional MTI (Weak)	23824327	PLPP3	1	2792.45	-0.275444	0.126787	-2.17249	0.0298185	0.101172	1911.38	0.111452	0.162238	0.686967	0.492104	0.77362
ENSG00000162607	7398	MIRT074514	hsa-mir-625-3p	Homo sapiens	USP1	Homo sapiens	PAR-CLIP	Functional MTI (Weak)	21572407	USP1	1	7054.61	-0.165271	0.123254	-1.3409	0.179953	0.369812	6072.1	-0.508777	0.163674	-3.10847	0.00188057	0.0385448
ENSG00000162607	7398	MIRT074514	hsa-mir-625-3p	Homo sapiens	USP1	Homo sapiens	PAR-CLIP	Functional MTI (Weak)	22012620	USP1	1	7054.61	-0.165271	0.123254	-1.3409	0.179953	0.369812	6072.1	-0.508777	0.163674	-3.10847	0.00188057	0.0385448
ENSG00000162971	129450	MIRT516859	hsa-mir-3144-3p	Homo sapiens	TYW5	Homo sapiens	PAR-CLIP	Functional MTI (Weak)	23446348	TYW5	2	1109.76	0.0247237	0.121818	0.202956	0.839169	0.921285	1593.43	-0.168842	0.17924	-0.941989	0.346198	0.669205
ENSG00000164220	2151	MIRT497777	hsa-mir-561-5p	Homo sapiens	F2RL2	Homo sapiens	PAR-CLIP	Functional MTI (Weak)	22291592	F2RL2	5	423.679	1.31915	0.204804	6.44102	1.18671e-10	3.94839e-09	342.175	0.178883	0.400554	0.446589	0.655172	0.86508
ENSG00000164830	55074	MIRT223806	hsa-mir-3144-3p	Homo sapiens	OXR1	Homo sapiens	PAR-CLIP	Functional MTI (Weak)	23592263	OXR1	8	993.139	-0.277169	0.130255	-2.12789	0.0333461	0.109814	641.783	-0.512895	0.169029	-3.03436	0.00241046	0.0446701
ENSG00000164916	221937	MIRT170932	hsa-mir-561-5p	Homo sapiens	FOXK1	Homo sapiens	PAR-CLIP	Functional MTI (Weak)	20371350	FOXK1	7	2055.89	-0.0318916	0.128582	-0.248025	0.804115	0.901179	803.818	-0.215168	0.228553	-0.941434	0.346482	0.669308
ENSG00000165118	84267	MIRT645326	hsa-mir-3144-3p	Homo sapiens	C9orf64	Homo sapiens	HITS-CLIP	Functional MTI (Weak)	23824327	C9orf64	9	2407.14	-0.209384	0.110611	-1.89299	0.0583598	0.166357	1918.79	-0.00294606	0.163015	-0.0180723	0.985581	0.99552
ENSG00000165891	144455	MIRT507485	hsa-mir-3144-3p	Homo sapiens	E2F7	Homo sapiens	HITS-CLIP	Functional MTI (Weak)	21572407	E2F7	12	1444.91	-0.398949	0.120762	-3.30359	0.000954538	0.00637492	930.978	-0.282717	0.196586	-1.43813	0.150397	0.470332
ENSG00000165891	144455	MIRT507485	hsa-mir-3144-3p	Homo sapiens	E2F7	Homo sapiens	PAR-CLIP	Functional MTI (Weak)	23446348	E2F7	12	1444.91	-0.398949	0.120762	-3.30359	0.000954538	0.00637492	930.978	-0.282717	0.196586	-1.43813	0.150397	0.470332
ENSG00000165891	144455	MIRT507485	hsa-mir-3144-3p	Homo sapiens	E2F7	Homo sapiens	PAR-CLIP	Functional MTI (Weak)	20371350	E2F7	12	1444.91	-0.398949	0.120762	-3.30359	0.000954538	0.00637492	930.978	-0.282717	0.196586	-1.43813	0.150397	0.470332
ENSG00000167487	55295	MIRT702351	hsa-mir-561-5p	Homo sapiens	KLHL26	Homo sapiens	HITS-CLIP	Functional MTI (Weak)	23313552	KLHL26	19	NA	NA	NA	NA	NA	NA	NA	NA	NA	NA	NA	NA
ENSG00000168036	1499	MIRT704441	hsa-mir-3144-3p	Homo sapiens	CTNNB1	Homo sapiens	HITS-CLIP	Functional MTI (Weak)	23313552	CTNNB1	3	45364.7	-0.216743	0.113885	-1.90317	0.0570185	0.163498	9700.72	0.0588721	0.183096	0.321537	0.747804	0.905474
ENSG00000170855	51499	MIRT546172	hsa-mir-625-3p	Homo sapiens	TRIAP1	Homo sapiens	PAR-CLIP	Functional MTI (Weak)	21572407	TRIAP1	12	1388.92	-0.107987	0.126434	-0.854098	0.393051	0.606568	3732.55	-0.196877	0.196093	-1.004	0.315379	0.644977
ENSG00000171862	5728	MIRT470092	hsa-mir-3144-3p	Homo sapiens	PTEN	Homo sapiens	PAR-CLIP	Functional MTI (Weak)	23592263	PTEN	10	3078.47	0.581936	0.119416	4.87318	1.09817e-06	1.75535e-05	3978.47	-0.165291	0.180127	-0.917638	0.358809	0.679568
ENSG00000174498	9543	MIRT718444	hsa-mir-561-5p	Homo sapiens	IGDCC3	Homo sapiens	HITS-CLIP	Functional MTI (Weak)	19536157	IGDCC3	15	2123.42	-0.596966	0.129871	-4.5966	4.29438e-06	5.85093e-05	2841.71	0.192064	0.226483	0.848032	0.39642	0.711161
ENSG00000175727	22877	MIRT612772	hsa-mir-561-5p	Homo sapiens	MLXIP	Homo sapiens	HITS-CLIP	Functional MTI (Weak)	19536157	MLXIP	12	1919.56	-0.316938	0.12524	-2.53065	0.0113853	0.0486561	1224.57	0.110747	0.196391	0.563909	0.572816	0.822912
ENSG00000175727	22877	MIRT612772	hsa-mir-561-5p	Homo sapiens	MLXIP	Homo sapiens	HITS-CLIP	Functional MTI (Weak)	23824327	MLXIP	12	1919.56	-0.316938	0.12524	-2.53065	0.0113853	0.0486561	1224.57	0.110747	0.196391	0.563909	0.572816	0.822912
ENSG00000176927	374786	MIRT514665	hsa-mir-561-5p	Homo sapiens	EFCAB5	Homo sapiens	PAR-CLIP	Functional MTI (Weak)	23446348	EFCAB5	17	24.3564	-0.883732	0.431257	-2.0492	0.0404426	0.126874	NA	NA	NA	NA	NA	NA
ENSG00000177125	403341	MIRT790771	hsa-mir-561-5p	Homo sapiens	ZBTB34	Homo sapiens	HITS-CLIP	Functional MTI (Weak)	28735896	ZBTB34	9	1743.21	-0.417811	0.113957	-3.66638	0.000246011	0.00201978	2168.08	-0.10456	0.194426	-0.537789	0.590723	0.832636
ENSG00000177570	401474	MIRT554466	hsa-mir-3144-3p	Homo sapiens	SAMD12	Homo sapiens	PAR-CLIP	Functional MTI (Weak)	21572407	SAMD12	8	168.035	0.505006	0.191199	2.64126	0.00825979	0.0377174	143.947	0.0986672	0.263165	0.374925	0.707716	0.889952
ENSG00000178295	348654	MIRT662520	hsa-mir-3144-3p	Homo sapiens	GEN1	Homo sapiens	HITS-CLIP	Functional MTI (Weak)	23824327	GEN1	2	3421.25	0.288134	0.134449	2.14307	0.0321077	0.106666	2083.45	-0.296027	0.237138	-1.24834	0.211908	0.547377
ENSG00000178665	349075	MIRT617967	hsa-mir-3144-3p	Homo sapiens	ZNF713	Homo sapiens	HITS-CLIP	Functional MTI (Weak)	23824327	ZNF713	7	220.087	-0.494499	0.182011	-2.71686	0.00659053	0.0314394	207.162	-0.401144	0.286222	-1.40151	0.161061	0.483149
ENSG00000180370	5062	MIRT535527	hsa-mir-625-3p	Homo sapiens	PAK2	Homo sapiens	PAR-CLIP	Functional MTI (Weak)	22012620	PAK2	3	7604.55	0.0639739	0.121446	0.526768	0.598355	0.771835	3990.06	-0.475321	0.223824	-2.12364	0.0337006	0.218178
ENSG00000182263	55137	MIRT537367	hsa-mir-625-3p	Homo sapiens	FIGN	Homo sapiens	PAR-CLIP	Functional MTI (Weak)	22012620	FIGN	2	4115.05	0.0282039	0.113365	0.248788	0.803525	0.900894	2690.12	-0.266926	0.168286	-1.58614	0.112707	0.408729
ENSG00000185129	5813	MIRT776110	hsa-mir-625-3p	Homo sapiens	PURA	Homo sapiens	PAR-CLIP	Functional MTI (Weak)	27292025	PURA	5	844.82	0.266059	0.135856	1.95838	0.0501851	0.149287	808.563	-0.1662	0.23941	-0.694206	0.487553	0.77061
ENSG00000186439	10345	MIRT713099	hsa-mir-561-5p	Homo sapiens	TRDN	Homo sapiens	HITS-CLIP	Functional MTI (Weak)	19536157	TRDN	6	NA	NA	NA	NA	NA	NA	NA	NA	NA	NA	NA	NA
ENSG00000189350	165186	MIRT523813	hsa-mir-3144-3p	Homo sapiens	TOGARAM2	Homo sapiens	PAR-CLIP	Functional MTI (Weak)	23446348	TOGARAM2	2	33.0703	-0.681612	0.387713	-1.75803	0.0787423	0.207665	NA	NA	NA	NA	NA	NA
ENSG00000196081	440519	MIRT721204	hsa-mir-625-3p	Homo sapiens	ZNF724	Homo sapiens	HITS-CLIP	Functional MTI (Weak)	19536157	ZNF724	19	897.604	-0.0239121	0.131586	-0.181722	0.855801	0.930038	844.809	-0.199632	0.166086	-1.20198	0.229371	0.56368
ENSG00000196091	4604	MIRT527630	hsa-mir-3144-3p	Homo sapiens	MYBPC1	Homo sapiens	PAR-CLIP	Functional MTI (Weak)	21572407	MYBPC1	12	12.5158	0.798572	0.618655	1.29082	0.196766	0.39174	NA	NA	NA	NA	NA	NA
ENSG00000196091	4604	MIRT527630	hsa-mir-3144-3p	Homo sapiens	MYBPC1	Homo sapiens	PAR-CLIP	Functional MTI (Weak)	22012620	MYBPC1	12	12.5158	0.798572	0.618655	1.29082	0.196766	0.39174	NA	NA	NA	NA	NA	NA
ENSG00000196152	7633	MIRT717998	hsa-mir-561-5p	Homo sapiens	ZNF79	Homo sapiens	HITS-CLIP	Functional MTI (Weak)	19536157	ZNF79	9	692.542	-0.336314	0.125903	-2.67121	0.00755794	0.0350971	685.649	0.58949	0.212659	2.772	0.00557133	0.0752728
ENSG00000196352	1604	MIRT647882	hsa-mir-3144-3p	Homo sapiens	CD55	Homo sapiens	HITS-CLIP	Functional MTI (Weak)	23824327	CD55	1	326.602	-1.56418	0.195565	-7.99828	1.26169e-15	7.45086e-14	287.107	-0.333936	0.30982	-1.07784	0.281106	0.613127
ENSG00000196505	54834	MIRT548108	hsa-mir-3144-3p	Homo sapiens	GDAP2	Homo sapiens	PAR-CLIP	Functional MTI (Weak)	21572407	GDAP2	1	1068.67	-0.210781	0.132415	-1.59183	0.111424	0.266148	1017.59	-0.178174	0.196	-0.90905	0.363324	0.68256
ENSG00000196776	961	MIRT776107	hsa-mir-625-3p	Homo sapiens	CD47	Homo sapiens	PAR-CLIP	Functional MTI (Weak)	27292025	CD47	3	1266.23	-0.462047	0.141302	-3.26992	0.0010758	0.00706908	1018.17	-0.0928914	0.292463	-0.317617	0.750775	0.906605
ENSG00000197081	3482	MIRT713895	hsa-mir-561-5p	Homo sapiens	IGF2R	Homo sapiens	HITS-CLIP	Functional MTI (Weak)	19536157	IGF2R	6	14918.3	-0.156845	0.110069	-1.42497	0.154167	0.33417	2393	-0.324728	0.188607	-1.72172	0.0851208	0.354079
ENSG00000198087	23607	MIRT219196	hsa-mir-625-3p	Homo sapiens	CD2AP	Homo sapiens	PAR-CLIP	Functional MTI (Weak)	22012620	CD2AP	6	2577.13	0.0832582	0.133945	0.621587	0.534214	0.723474	1273.99	-0.355301	0.164277	-2.16281	0.0305557	0.206718
ENSG00000198774	9182	MIRT787710	hsa-mir-561-5p	Homo sapiens	RASSF9	Homo sapiens	HITS-CLIP	Functional MTI (Weak)	27418678	RASSF9	12	770.555	0.548832	0.141738	3.87217	0.000107871	0.00100771	818.378	-0.0726794	0.210669	-0.344993	0.7301	0.898701
ENSG00000205084	79583	MIRT496988	hsa-mir-561-5p	Homo sapiens	TMEM231	Homo sapiens	PAR-CLIP	Functional MTI (Weak)	22291592	TMEM231	16	38.4586	0.25453	0.341903	0.744451	0.456604	0.660926	NA	NA	NA	NA	NA	NA
ENSG00000213064	375035	MIRT699668	hsa-mir-561-5p	Homo sapiens	SFT2D2	Homo sapiens	HITS-CLIP	Functional MTI (Weak)	23313552	SFT2D2	1	4160.06	-0.316979	0.124971	-2.53641	0.0111995	0.0480022	3816.3	0.115297	0.189102	0.609711	0.542054	0.802368
ENSG00000221845	401335	MIRT572545	hsa-mir-625-3p	Homo sapiens	C7orf65	Homo sapiens	PAR-CLIP	Functional MTI (Weak)	20371350	C7orf65	7	NA	NA	NA	NA	NA	NA	NA	NA	NA	NA	NA	NA
ENSG00000221866	91584	MIRT571803	hsa-mir-561-5p	Homo sapiens	PLXNA4	Homo sapiens	PAR-CLIP	Functional MTI (Weak)	20371350	PLXNA4	7	NA	NA	NA	NA	NA	NA	NA	NA	NA	NA	NA	NA
ENSG00000222036	641455	MIRT776109	hsa-mir-625-3p	Homo sapiens	POTEM	Homo sapiens	PAR-CLIP	Functional MTI (Weak)	27292025	POTEM	14	NA	NA	NA	NA	NA	NA	NA	NA	NA	NA	NA	NA
ENSG00000224531	221710	MIRT257106	hsa-mir-561-5p	Homo sapiens	SMIM13	Homo sapiens	PAR-CLIP	Functional MTI (Weak)	23592263	SMIM13	6	662.927	0.0340344	0.147786	0.230296	0.817862	0.909088	946.103	-0.0367295	0.183409	-0.20026	0.841278	0.941605
ENSG00000240344	53938	MIRT531262	hsa-mir-3144-3p	Homo sapiens	PPIL3	Homo sapiens	PAR-CLIP	Functional MTI (Weak)	22012620	PPIL3	2	1193.16	-0.25798	0.119921	-2.15124	0.0314572	0.105006	2209.06	0.153923	0.140029	1.09922	0.271671	0.602142
ENSG00000242265	23089	MIRT547157	hsa-mir-625-3p	Homo sapiens	PEG10	Homo sapiens	PAR-CLIP	Functional MTI (Weak)	21572407	PEG10	7	105354	-0.390692	0.111319	-3.50965	0.000448692	0.00337318	48468.1	-0.382164	0.215979	-1.76945	0.0768185	0.339119
ENSG00000250423	57481	MIRT527301	hsa-mir-3144-3p	Homo sapiens	KIAA1210	Homo sapiens	PAR-CLIP	Functional MTI (Weak)	22012620	KIAA1210	X	NA	NA	NA	NA	NA	NA	NA	NA	NA	NA	NA	NA
ENSG00000253797	9724	MIRT543333	hsa-mir-3144-3p	Homo sapiens	UTP14C	Homo sapiens	PAR-CLIP	Functional MTI (Weak)	21572407	UTP14C	13	2204.25	0.177775	0.117351	1.5149	0.129797	0.295763	1496.64	-0.550565	0.193914	-2.83922	0.0045224	0.0657912
ENSG00000265817	100861412	MIRT712830	hsa-mir-3144-3p	Homo sapiens	FSBP	Homo sapiens	HITS-CLIP	Functional MTI (Weak)	19536157	FSBP	8	NA	NA	NA	NA	NA	NA	NA	NA	NA	NA	NA	NA
NA	642489	MIRT498143	hsa-mir-561-5p	Homo sapiens	FKBP1C	Homo sapiens	PAR-CLIP	Functional MTI (Weak)	22291592	NA	NA	NA	NA	NA	NA	NA	NA	NA	NA	NA	NA	NA	NA
NA	130872	MIRT539314	hsa-mir-561-5p	Homo sapiens	AHSA2	Homo sapiens	PAR-CLIP	Functional MTI (Weak)	22012620	NA	NA	NA	NA	NA	NA	NA	NA	NA	NA	NA	NA	NA	NA
NA	390874	MIRT655614	hsa-mir-3144-3p	Homo sapiens	ONECUT3	Homo sapiens	HITS-CLIP	Functional MTI (Weak)	23824327	NA	NA	NA	NA	NA	NA	NA	NA	NA	NA	NA	NA	NA	NA
NA	64282	MIRT561806	hsa-mir-625-3p	Homo sapiens	PAPD5	Homo sapiens	PAR-CLIP	Functional MTI (Weak)	20371350	NA	NA	NA	NA	NA	NA	NA	NA	NA	NA	NA	NA	NA	NA
NA	10807	MIRT565811	hsa-mir-561-5p	Homo sapiens	SDCCAG3	Homo sapiens	PAR-CLIP	Functional MTI (Weak)	20371350	NA	NA	NA	NA	NA	NA	NA	NA	NA	NA	NA	NA	NA	NA
NA	100240709	MIRT650665	hsa-mir-561-5p	Homo sapiens	GAPDHP44	Homo sapiens	HITS-CLIP	Functional MTI (Weak)	23824327	NA	NA	NA	NA	NA	NA	NA	NA	NA	NA	NA	NA	NA	NA
NA	642489	MIRT498143	hsa-mir-561-5p	Homo sapiens	FKBP1C	Homo sapiens	PAR-CLIP	Functional MTI (Weak)	21572407	NA	NA	NA	NA	NA	NA	NA	NA	NA	NA	NA	NA	NA	NA
