# Supplementary material
Source: HighWire-hosted journal article supplement (doi:10.1101/rna.080097.124)
Supplement: Supplemental_TableS15a.xlsx [file Supplemental_TableS15a.xlsx]

## Sheet: res3_remi_biomart
ensembl_gene_id	hgnc_symbol	description	baseMean	log2FoldChange	lfcSE	stat	pvalue	padj
ENSG00000004534	RBM6	RNA binding motif protein 6 [Source:HGNC Symbol;Acc:HGNC:9903]	13.1926	-0.0811582	0.498095	-0.162937	0.870568	0.961764
ENSG00000005206	SPPL2B	signal peptide peptidase like 2B [Source:HGNC Symbol;Acc:HGNC:30627]	163.892	-0.077752	0.234235	-0.331939	0.739935	0.936837
ENSG00000006194	ZNF263	zinc finger protein 263 [Source:HGNC Symbol;Acc:HGNC:13056]	12.0089	0.642418	0.540411	1.18876	0.234535	0.580288
ENSG00000006831	ADIPOR2	adiponectin receptor 2 [Source:HGNC Symbol;Acc:HGNC:24041]	42.1938	0.402688	0.343838	1.17116	0.241536	0.587961
ENSG00000007376	RPUSD1	RNA pseudouridine synthase domain containing 1 [Source:HGNC Symbol;Acc:HGNC:14173]	23.353	-0.607856	0.406653	-1.49478	0.134972	0.433897
ENSG00000008988	RPS20	ribosomal protein S20 [Source:HGNC Symbol;Acc:HGNC:10405]	318.863	0.368419	0.21331	1.72715	0.0841407	0.339083
ENSG00000011304	PTBP1	polypyrimidine tract binding protein 1 [Source:HGNC Symbol;Acc:HGNC:9583]	36.2549	-0.674425	0.354714	-1.90132	0.05726	0.265251
ENSG00000026025	VIM	vimentin [Source:HGNC Symbol;Acc:HGNC:12692]	77.0149	-0.000722407	0.264821	-0.0027279	0.997823	0.999532
ENSG00000030419	IKZF2	IKAROS family zinc finger 2 [Source:HGNC Symbol;Acc:HGNC:13177]	24.1012	-0.222295	0.387224	-0.574073	0.565919	0.882024
ENSG00000033100	CHPF2	chondroitin polymerizing factor 2 [Source:HGNC Symbol;Acc:HGNC:29270]	735.189	0.153563	0.189124	0.811973	0.416807	0.770438
ENSG00000033627	ATP6V0A1	ATPase H+ transporting V0 subunit a1 [Source:HGNC Symbol;Acc:HGNC:865]	75.6787	-0.154362	0.286052	-0.539631	0.589451	0.891115
ENSG00000052802	MSMO1	methylsterol monooxygenase 1 [Source:HGNC Symbol;Acc:HGNC:10545]	17.2544	1.0608	0.464005	2.28618	0.0222436	0.142802
ENSG00000055044	NOP58	NOP58 ribonucleoprotein [Source:HGNC Symbol;Acc:HGNC:29926]	1733.28	-0.153952	0.194055	-0.793342	0.427578	0.77101
ENSG00000060339	CCAR1	cell division cycle and apoptosis regulator 1 [Source:HGNC Symbol;Acc:HGNC:24236]	1409.29	0.153039	0.321731	0.475673	0.634307	0.903114
ENSG00000062716	VMP1	vacuole membrane protein 1 [Source:HGNC Symbol;Acc:HGNC:29559]	620364	0.281695	0.200896	1.40219	0.160859	0.466581
ENSG00000064393	HIPK2	homeodomain interacting protein kinase 2 [Source:HGNC Symbol;Acc:HGNC:14402]	12.5411	0.390495	0.510819	0.764448	0.4446	0.78474
ENSG00000065135	GNAI3	G protein subunit alpha i3 [Source:HGNC Symbol;Acc:HGNC:4387]	1991.11	-0.437008	0.247208	-1.76777	0.077099	0.321138
ENSG00000065526	SPEN	spen family transcriptional repressor [Source:HGNC Symbol;Acc:HGNC:17575]	12.2358	0.234177	0.534846	0.437839	0.661503	0.910397
ENSG00000067064	IDI1	isopentenyl-diphosphate delta isomerase 1 [Source:HGNC Symbol;Acc:HGNC:5387]	17.4511	0.417816	0.468536	0.891748	0.372528	0.733837
ENSG00000067225	PKM	pyruvate kinase M1/2 [Source:HGNC Symbol;Acc:HGNC:9021]	138.84	0.101584	0.249753	0.40674	0.684199	0.916518
ENSG00000069275	NUCKS1	nuclear casein kinase and cyclin dependent kinase substrate 1 [Source:HGNC Symbol;Acc:HGNC:29923]	12.2401	-0.246741	0.52786	-0.467437	0.640187	0.903114
ENSG00000070814	TCOF1	treacle ribosome biogenesis factor 1 [Source:HGNC Symbol;Acc:HGNC:11654]	99.5228	-0.308319	0.309098	-0.997478	0.318533	0.688456
ENSG00000071054	MAP4K4	mitogen-activated protein kinase kinase kinase kinase 4 [Source:HGNC Symbol;Acc:HGNC:6866]	14.4418	-0.712355	0.50806	-1.40211	0.160883	0.466581
ENSG00000072274	TFRC	transferrin receptor [Source:HGNC Symbol;Acc:HGNC:11763]	11.5398	-1.46177	0.578614	-2.52633	0.0115262	0.0916547
ENSG00000072501	SMC1A	structural maintenance of chromosomes 1A [Source:HGNC Symbol;Acc:HGNC:11111]	15.583	-0.174528	0.477146	-0.365774	0.714534	0.924727
ENSG00000072803	FBXW11	F-box and WD repeat domain containing 11 [Source:HGNC Symbol;Acc:HGNC:13607]	14.5421	-0.133286	0.492105	-0.270849	0.786507	0.945824
ENSG00000072864	NDE1	nudE neurodevelopment protein 1 [Source:HGNC Symbol;Acc:HGNC:17619]	775.767	0.213704	0.182273	1.17244	0.24102	0.587961
ENSG00000075415	SLC25A3	solute carrier family 25 member 3 [Source:HGNC Symbol;Acc:HGNC:10989]	79.6897	0.366464	0.276476	1.32548	0.185011	0.506594
ENSG00000075624	ACTB	actin beta [Source:HGNC Symbol;Acc:HGNC:132]	21.2336	0.209837	0.429849	0.488165	0.625433	0.902562
ENSG00000076604	TRAF4	TNF receptor associated factor 4 [Source:HGNC Symbol;Acc:HGNC:12034]	12.4623	0.0134057	0.525413	0.0255146	0.979644	0.994141
ENSG00000076770	MBNL3	muscleblind like splicing regulator 3 [Source:HGNC Symbol;Acc:HGNC:20564]	12.2307	0.860599	0.53076	1.62145	0.104922	0.384281
ENSG00000078399	HOXA9	homeobox A9 [Source:HGNC Symbol;Acc:HGNC:5109]	96.8501	-1.74307	0.277031	-6.29199	3.13422e-10	5.17843e-08
ENSG00000080824	HSP90AA1	heat shock protein 90 alpha family class A member 1 [Source:HGNC Symbol;Acc:HGNC:5253]	26.7725	0.135184	0.374395	0.361072	0.718046	0.926938
ENSG00000081051	AFP	alpha fetoprotein [Source:HGNC Symbol;Acc:HGNC:317]	59.9262	-0.400638	0.280161	-1.43002	0.15271	0.457969
ENSG00000084090	STARD7	StAR related lipid transfer domain containing 7 [Source:HGNC Symbol;Acc:HGNC:18063]	11.6494	0.0522693	0.566364	0.0922893	0.926468	0.979842
ENSG00000084674	APOB	apolipoprotein B [Source:HGNC Symbol;Acc:HGNC:603]	62.0806	0.24024	0.290111	0.828098	0.407615	0.765171
ENSG00000084693	AGBL5	ATP/GTP binding protein like 5 [Source:HGNC Symbol;Acc:HGNC:26147]	34.1741	-0.130701	0.351863	-0.371456	0.710298	0.923263
ENSG00000085377	PREP	prolyl endopeptidase [Source:HGNC Symbol;Acc:HGNC:9358]	20.4166	0.25047	0.42378	0.591036	0.554496	0.869763
ENSG00000087086	FTL	ferritin light chain [Source:HGNC Symbol;Acc:HGNC:3999]	56.5325	0.283182	0.288076	0.983009	0.325603	0.689726
ENSG00000087460	GNAS	GNAS complex locus [Source:HGNC Symbol;Acc:HGNC:4392]	10.461	-0.542831	0.56178	-0.966271	0.333909	0.699327
ENSG00000089280	FUS	FUS RNA binding protein [Source:HGNC Symbol;Acc:HGNC:4010]	13.326	0.645631	0.499692	1.29206	0.196337	0.525096
ENSG00000090863	GLG1	golgi glycoprotein 1 [Source:HGNC Symbol;Acc:HGNC:4316]	11.7294	0.480422	0.5535	0.86797	0.385411	0.746231
ENSG00000091513	TF	transferrin [Source:HGNC Symbol;Acc:HGNC:11740]	29.3538	0.0127358	0.366652	0.0347354	0.972291	0.994141
ENSG00000092036	HAUS4	HAUS augmin like complex subunit 4 [Source:HGNC Symbol;Acc:HGNC:20163]	11.6089	-0.156737	0.556391	-0.281702	0.778172	0.945104
ENSG00000092148	HECTD1	HECT domain E3 ubiquitin protein ligase 1 [Source:HGNC Symbol;Acc:HGNC:20157]	28.1453	-0.389352	0.375194	-1.03773	0.299394	0.666464
ENSG00000092199	HNRNPC	heterogeneous nuclear ribonucleoprotein C [Source:HGNC Symbol;Acc:HGNC:5035]	11.437	0.364965	0.549827	0.663782	0.50683	0.84396
ENSG00000092841	MYL6	myosin light chain 6 [Source:HGNC Symbol;Acc:HGNC:7587]	30.493	-0.0703631	0.35918	-0.195899	0.844689	0.958264
ENSG00000094916	CBX5	chromobox 5 [Source:HGNC Symbol;Acc:HGNC:1555]	13.7534	0.418311	0.501384	0.834312	0.404105	0.765171
ENSG00000095739	BAMBI	BMP and activin membrane bound inhibitor [Source:HGNC Symbol;Acc:HGNC:30251]	10.903	-0.333521	0.549797	-0.606626	0.544099	0.867597
ENSG00000096384	HSP90AB1	heat shock protein 90 alpha family class B member 1 [Source:HGNC Symbol;Acc:HGNC:5258]	10.4865	0.455542	0.560243	0.813115	0.416152	0.770438
ENSG00000099194	SCD	stearoyl-CoA desaturase [Source:HGNC Symbol;Acc:HGNC:10571]	25.336	0.492239	0.390914	1.2592	0.207959	0.54347
ENSG00000099901	RANBP1	RAN binding protein 1 [Source:HGNC Symbol;Acc:HGNC:9847]	174.155	-0.179554	0.223219	-0.804385	0.421175	0.770438
ENSG00000100124	ANKRD54	ankyrin repeat domain 54 [Source:HGNC Symbol;Acc:HGNC:25185]	13.6038	-0.26969	0.516336	-0.522314	0.601452	0.894359
ENSG00000100201	DDX17	DEAD-box helicase 17 [Source:HGNC Symbol;Acc:HGNC:2740]	17.2218	0.152529	0.443211	0.344145	0.730737	0.936837
ENSG00000100219	XBP1	X-box binding protein 1 [Source:HGNC Symbol;Acc:HGNC:12801]	26.9033	0.385539	0.388119	0.993351	0.320539	0.689726
ENSG00000100239	PPP6R2	protein phosphatase 6 regulatory subunit 2 [Source:HGNC Symbol;Acc:HGNC:19253]	255.6	0.160836	0.227034	0.708423	0.478683	0.818162
ENSG00000100316	RPL3	ribosomal protein L3 [Source:HGNC Symbol;Acc:HGNC:10332]	52335.1	0.206966	0.188445	1.09829	0.272079	0.632007
ENSG00000100650	SRSF5	serine and arginine rich splicing factor 5 [Source:HGNC Symbol;Acc:HGNC:10787]	32.5451	0.317824	0.345144	0.920845	0.357131	0.723081
ENSG00000100811	YY1	YY1 transcription factor [Source:HGNC Symbol;Acc:HGNC:12856]	29.6522	0.122742	0.371667	0.330248	0.741213	0.936837
ENSG00000100852	ARHGAP5	Rho GTPase activating protein 5 [Source:HGNC Symbol;Acc:HGNC:675]	25.1362	0.203338	0.413415	0.49185	0.622825	0.902442
ENSG00000100888	CHD8	chromodomain helicase DNA binding protein 8 [Source:HGNC Symbol;Acc:HGNC:20153]	73.2748	0.0486361	0.268359	0.181235	0.856183	0.959481
ENSG00000101076	HNF4A	hepatocyte nuclear factor 4 alpha [Source:HGNC Symbol;Acc:HGNC:5024]	10.7197	0.348232	0.574425	0.606228	0.544363	0.867597
ENSG00000101361	NOP56	NOP56 ribonucleoprotein [Source:HGNC Symbol;Acc:HGNC:15911]	37346.3	0.388286	0.20826	1.86443	0.0622612	0.284869
ENSG00000101384	JAG1	jagged canonical Notch ligand 1 [Source:HGNC Symbol;Acc:HGNC:6188]	18.2607	-0.438604	0.453357	-0.967457	0.333315	0.699069
ENSG00000101438	SLC32A1	solute carrier family 32 member 1 [Source:HGNC Symbol;Acc:HGNC:11018]	13.0716	-0.283471	0.53202	-0.532821	0.594158	0.891115
ENSG00000102226	USP11	ubiquitin specific peptidase 11 [Source:HGNC Symbol;Acc:HGNC:12609]	530.57	-0.549741	0.201844	-2.72359	0.00645766	0.0613905
ENSG00000102554	KLF5	Kruppel like factor 5 [Source:HGNC Symbol;Acc:HGNC:6349]	10.4081	0.340895	0.569267	0.598831	0.549285	0.86975
ENSG00000103091	WDR59	WD repeat domain 59 [Source:HGNC Symbol;Acc:HGNC:25706]	24.7611	-0.173093	0.391165	-0.442506	0.658123	0.910162
ENSG00000103257	SLC7A5	solute carrier family 7 member 5 [Source:HGNC Symbol;Acc:HGNC:11063]	21.5837	-0.0776514	0.432802	-0.179416	0.857611	0.959481
ENSG00000103534	TMC5	transmembrane channel like 5 [Source:HGNC Symbol;Acc:HGNC:22999]	15.5515	-0.0211054	0.49285	-0.0428232	0.965842	0.994141
ENSG00000104635	SLC39A14	solute carrier family 39 member 14 [Source:HGNC Symbol;Acc:HGNC:20858]	10.5362	0.371187	0.567518	0.654052	0.513078	0.84973
ENSG00000104812	GYS1	glycogen synthase 1 [Source:HGNC Symbol;Acc:HGNC:4706]	11.9331	0.556051	0.528176	1.05278	0.292443	0.659883
ENSG00000104824	HNRNPL	heterogeneous nuclear ribonucleoprotein L [Source:HGNC Symbol;Acc:HGNC:5045]	11.5127	0.443222	0.548317	0.808332	0.418899	0.770438
ENSG00000104904	OAZ1	ornithine decarboxylase antizyme 1 [Source:HGNC Symbol;Acc:HGNC:8095]	10.8951	-0.800519	0.563653	-1.42024	0.155539	0.461085
ENSG00000105053	VRK3	VRK serine/threonine kinase 3 [Source:HGNC Symbol;Acc:HGNC:18996]	22.0551	0.705009	0.425377	1.65738	0.0974435	0.370584
ENSG00000105640	RPL18A	ribosomal protein L18a [Source:HGNC Symbol;Acc:HGNC:10311]	310.75	-0.187836	0.198184	-0.947786	0.343239	0.71047
ENSG00000105699	LSR	lipolysis stimulated lipoprotein receptor [Source:HGNC Symbol;Acc:HGNC:29572]	11.1234	-0.220228	0.567334	-0.38818	0.697883	0.918634
ENSG00000106003	LFNG	LFNG O-fucosylpeptide 3-beta-N-acetylglucosaminyltransferase [Source:HGNC Symbol;Acc:HGNC:6560]	10.5084	0.77212	0.574654	1.34363	0.179069	0.496208
ENSG00000106261	ZKSCAN1	zinc finger with KRAB and SCAN domains 1 [Source:HGNC Symbol;Acc:HGNC:13101]	12.0174	0.331321	0.539527	0.614095	0.539152	0.865907
ENSG00000106263	EIF3B	eukaryotic translation initiation factor 3 subunit B [Source:HGNC Symbol;Acc:HGNC:3280]	11.665	0.721282	0.562848	1.28149	0.200023	0.531422
ENSG00000106591	MRPL32	mitochondrial ribosomal protein L32 [Source:HGNC Symbol;Acc:HGNC:14035]	381.581	0.162508	0.202287	0.803356	0.421769	0.770438
ENSG00000107130	NCS1	neuronal calcium sensor 1 [Source:HGNC Symbol;Acc:HGNC:3953]	11.1592	0.0250933	0.564359	0.0444633	0.964535	0.994141
ENSG00000107331	ABCA2	ATP binding cassette subfamily A member 2 [Source:HGNC Symbol;Acc:HGNC:32]	15.7829	0.145531	0.460892	0.31576	0.752185	0.936837
ENSG00000107372	ZFAND5	zinc finger AN1-type containing 5 [Source:HGNC Symbol;Acc:HGNC:13008]	14.3502	0.00375805	0.49124	0.00765013	0.993896	0.998971
ENSG00000107984	DKK1	dickkopf WNT signaling pathway inhibitor 1 [Source:HGNC Symbol;Acc:HGNC:2891]	16.8206	-0.644387	0.462461	-1.39339	0.163503	0.469604
ENSG00000108256	NUFIP2	nuclear FMR1 interacting protein 2 [Source:HGNC Symbol;Acc:HGNC:17634]	20.2301	-0.0643649	0.428396	-0.150246	0.88057	0.96649
ENSG00000108352	RAPGEFL1	Rap guanine nucleotide exchange factor like 1 [Source:HGNC Symbol;Acc:HGNC:17428]	16.63	-0.296315	0.495043	-0.598564	0.549464	0.86975
ENSG00000108592	FTSJ3	FtsJ RNA 2'-O-methyltransferase 3 [Source:HGNC Symbol;Acc:HGNC:17136]	13.8095	-0.948723	0.514629	-1.84351	0.0652546	0.292989
ENSG00000108654	DDX5	DEAD-box helicase 5 [Source:HGNC Symbol;Acc:HGNC:2746]	37.4002	-0.0566058	0.343844	-0.164626	0.869238	0.961764
ENSG00000108960	MMD	monocyte to macrophage differentiation associated [Source:HGNC Symbol;Acc:HGNC:7153]	11.3484	-0.448938	0.539477	-0.832172	0.405312	0.765171
ENSG00000109046	WSB1	WD repeat and SOCS box containing 1 [Source:HGNC Symbol;Acc:HGNC:19221]	10.7087	0.257477	0.592719	0.434399	0.663999	0.91138
ENSG00000109062	SLC9A3R1	SLC9A3 regulator 1 [Source:HGNC Symbol;Acc:HGNC:11075]	57.0851	-0.573345	0.29347	-1.95368	0.0507393	0.245763
ENSG00000109184	DCUN1D4	defective in cullin neddylation 1 domain containing 4 [Source:HGNC Symbol;Acc:HGNC:28998]	10.7183	-0.194748	0.589771	-0.330209	0.741242	0.936837
ENSG00000109475	RPL34	ribosomal protein L34 [Source:HGNC Symbol;Acc:HGNC:10340]	424.474	0.0643478	0.197484	0.325838	0.744547	0.936837
ENSG00000109606	DHX15	DEAH-box helicase 15 [Source:HGNC Symbol;Acc:HGNC:2738]	13.9138	0.529258	0.495002	1.0692	0.284978	0.651941
ENSG00000109971	HSPA8	heat shock protein family A (Hsp70) member 8 [Source:HGNC Symbol;Acc:HGNC:5241]	2029.81	0.163751	0.17312	0.94588	0.34421	0.71047
ENSG00000110092	CCND1	cyclin D1 [Source:HGNC Symbol;Acc:HGNC:1582]	13.0646	0.704764	0.539172	1.30712	0.191171	0.516858
ENSG00000110321	EIF4G2	eukaryotic translation initiation factor 4 gamma 2 [Source:HGNC Symbol;Acc:HGNC:3297]	63.3294	-0.0578907	0.305301	-0.189618	0.849608	0.958264
ENSG00000110700	RPS13	ribosomal protein S13 [Source:HGNC Symbol;Acc:HGNC:10386]	111.5	0.0414865	0.259573	0.159826	0.873018	0.962465
ENSG00000110721	CHKA	choline kinase alpha [Source:HGNC Symbol;Acc:HGNC:1937]	19.0085	0.008978	0.432649	0.0207512	0.983444	0.994141
ENSG00000111196	MAGOHB	mago homolog B, exon junction complex subunit [Source:HGNC Symbol;Acc:HGNC:25504]	13.8338	-0.0995007	0.501895	-0.19825	0.842849	0.958264
ENSG00000111371	SLC38A1	solute carrier family 38 member 1 [Source:HGNC Symbol;Acc:HGNC:13447]	15.9033	0.648944	0.463057	1.40143	0.161085	0.466581
ENSG00000111678	C12orf57	chromosome 12 open reading frame 57 [Source:HGNC Symbol;Acc:HGNC:29521]	136.34	-0.0467122	0.22299	-0.209481	0.834073	0.955521
ENSG00000111885	MAN1A1	mannosidase alpha class 1A member 1 [Source:HGNC Symbol;Acc:HGNC:6821]	10.7476	0.14228	0.556195	0.25581	0.798097	0.945824
ENSG00000112972	HMGCS1	3-hydroxy-3-methylglutaryl-CoA synthase 1 [Source:HGNC Symbol;Acc:HGNC:5007]	68.8414	0.585679	0.268632	2.18023	0.0292405	0.175325
ENSG00000113013	HSPA9	heat shock protein family A (Hsp70) member 9 [Source:HGNC Symbol;Acc:HGNC:5244]	44920.7	0.49855	0.186057	2.67955	0.00737213	0.0656428
ENSG00000113161	HMGCR	3-hydroxy-3-methylglutaryl-CoA reductase [Source:HGNC Symbol;Acc:HGNC:5006]	13.7395	0.449243	0.492445	0.912271	0.361626	0.725692
ENSG00000113240	CLK4	CDC like kinase 4 [Source:HGNC Symbol;Acc:HGNC:13659]	18.7059	-0.430985	0.468301	-0.920317	0.357407	0.723081
ENSG00000113391	FAM172A	family with sequence similarity 172 member A [Source:HGNC Symbol;Acc:HGNC:25365]	129.512	0.817875	0.234785	3.48351	0.000494888	0.0105128
ENSG00000114942	EEF1B2	eukaryotic translation elongation factor 1 beta 2 [Source:HGNC Symbol;Acc:HGNC:3208]	29.5769	0.0625555	0.371951	0.168182	0.86644	0.960057
ENSG00000115053	NCL	nucleolin [Source:HGNC Symbol;Acc:HGNC:7667]	13.4929	0.314865	0.528783	0.595452	0.551541	0.869763
ENSG00000115286	NDUFS7	NADH:ubiquinone oxidoreductase core subunit S7 [Source:HGNC Symbol;Acc:HGNC:7714]	32.9133	-0.426383	0.393064	-1.08477	0.278025	0.640965
ENSG00000115306	SPTBN1	spectrin beta, non-erythrocytic 1 [Source:HGNC Symbol;Acc:HGNC:11275]	24.9309	-0.33738	0.397395	-0.848978	0.395894	0.75765
ENSG00000115414	FN1	fibronectin 1 [Source:HGNC Symbol;Acc:HGNC:3778]	11.1619	0.0867132	0.54589	0.158847	0.873789	0.962465
ENSG00000115705	TPO	thyroid peroxidase [Source:HGNC Symbol;Acc:HGNC:12015]	304.062	-0.413039	0.26793	-1.5416	0.123172	0.413295
ENSG00000116014	KISS1R	KISS1 receptor [Source:HGNC Symbol;Acc:HGNC:4510]	17.5101	-0.375066	0.452667	-0.828568	0.407349	0.765171
ENSG00000116016	EPAS1	endothelial PAS domain protein 1 [Source:HGNC Symbol;Acc:HGNC:3374]	10.7858	-0.0260715	0.573899	-0.0454286	0.963766	0.994141
ENSG00000116017	ARID3A	AT-rich interaction domain 3A [Source:HGNC Symbol;Acc:HGNC:3031]	16.4181	-0.544914	0.464516	-1.17308	0.240764	0.587961
ENSG00000116133	DHCR24	24-dehydrocholesterol reductase [Source:HGNC Symbol;Acc:HGNC:2859]	15.1844	0.174848	0.472598	0.369971	0.711404	0.923292
ENSG00000116560	SFPQ	splicing factor proline and glutamine rich [Source:HGNC Symbol;Acc:HGNC:10774]	12.7727	-0.64488	0.561937	-1.1476	0.251133	0.601344
ENSG00000117318	ID3	inhibitor of DNA binding 3, HLH protein [Source:HGNC Symbol;Acc:HGNC:5362]	23.7537	0.52431	0.422523	1.2409	0.214642	0.54935
ENSG00000117425	PTCH2	patched 2 [Source:HGNC Symbol;Acc:HGNC:9586]	40.671	-0.0588776	0.326087	-0.180558	0.856715	0.959481
ENSG00000117450	PRDX1	peroxiredoxin 1 [Source:HGNC Symbol;Acc:HGNC:9352]	16.8458	0.618194	0.465769	1.32726	0.184424	0.505976
ENSG00000117519	CNN3	calponin 3 [Source:HGNC Symbol;Acc:HGNC:2157]	43.693	-0.335968	0.317911	-1.0568	0.290604	0.657636
ENSG00000117632	STMN1	stathmin 1 [Source:HGNC Symbol;Acc:HGNC:6510]	12.4563	0.24306	0.538944	0.450993	0.651995	0.909143
ENSG00000117707	PROX1	prospero homeobox 1 [Source:HGNC Symbol;Acc:HGNC:9459]	15.3725	-0.343523	0.474981	-0.723235	0.469535	0.809976
ENSG00000118515	SGK1	serum/glucocorticoid regulated kinase 1 [Source:HGNC Symbol;Acc:HGNC:10810]	13.4445	-0.95641	0.516386	-1.85212	0.0640085	0.291072
ENSG00000119004	CYP20A1	cytochrome P450 family 20 subfamily A member 1 [Source:HGNC Symbol;Acc:HGNC:20576]	12.3124	0.226401	0.51576	0.438967	0.660686	0.910397
ENSG00000119446	RBM18	RNA binding motif protein 18 [Source:HGNC Symbol;Acc:HGNC:28413]	14.4687	-0.687921	0.514129	-1.33803	0.180886	0.498107
ENSG00000119547	ONECUT2	one cut homeobox 2 [Source:HGNC Symbol;Acc:HGNC:8139]	13.8719	-0.350066	0.496923	-0.704468	0.481142	0.820121
ENSG00000119943	PYROXD2	pyridine nucleotide-disulphide oxidoreductase domain 2 [Source:HGNC Symbol;Acc:HGNC:23517]	19.7567	-1.56311	0.462972	-3.37626	0.000734797	0.0126085
ENSG00000120137	PANK3	pantothenate kinase 3 [Source:HGNC Symbol;Acc:HGNC:19365]	27.8594	0.580868	0.368097	1.57803	0.114559	0.402363
ENSG00000120438	TCP1	t-complex 1 [Source:HGNC Symbol;Acc:HGNC:11655]	28.0093	-0.351811	0.376707	-0.933911	0.35035	0.716602
ENSG00000120802	TMPO	thymopoietin [Source:HGNC Symbol;Acc:HGNC:11875]	11.1545	-0.534521	0.570114	-0.937569	0.348466	0.714058
ENSG00000120885	CLU	clusterin [Source:HGNC Symbol;Acc:HGNC:2095]	17.5964	0.648134	0.472141	1.37275	0.169829	0.479194
ENSG00000120899	PTK2B	protein tyrosine kinase 2 beta [Source:HGNC Symbol;Acc:HGNC:9612]	15.2675	0.122785	0.503734	0.24375	0.807425	0.945824
ENSG00000121741	ZMYM2	zinc finger MYM-type containing 2 [Source:HGNC Symbol;Acc:HGNC:12989]	1576.72	0.077002	0.194799	0.395289	0.692629	0.917243
ENSG00000122026	RPL21	ribosomal protein L21 [Source:HGNC Symbol;Acc:HGNC:10313]	25997	0.558882	0.180473	3.09676	0.0019565	0.0244481
ENSG00000122406	RPL5	ribosomal protein L5 [Source:HGNC Symbol;Acc:HGNC:10360]	16485.8	0.0529343	0.179387	0.295085	0.767929	0.94271
ENSG00000122566	HNRNPA2B1	heterogeneous nuclear ribonucleoprotein A2/B1 [Source:HGNC Symbol;Acc:HGNC:5033]	21.6326	0.00759564	0.448541	0.0169341	0.986489	0.996374
ENSG00000123416	TUBA1B	tubulin alpha 1b [Source:HGNC Symbol;Acc:HGNC:18809]	14.6436	0.41318	0.495711	0.833509	0.404558	0.765171
ENSG00000123505	AMD1	adenosylmethionine decarboxylase 1 [Source:HGNC Symbol;Acc:HGNC:457]	13.3355	0.228803	0.508824	0.44967	0.652948	0.909143
ENSG00000123684	LPGAT1	lysophosphatidylglycerol acyltransferase 1 [Source:HGNC Symbol;Acc:HGNC:28985]	11.3728	0.0344387	0.555628	0.0619815	0.950578	0.991936
ENSG00000124193	SRSF6	serine and arginine rich splicing factor 6 [Source:HGNC Symbol;Acc:HGNC:10788]	16.0115	0.0956479	0.490523	0.194992	0.845399	0.958264
ENSG00000124209	RAB22A	RAB22A, member RAS oncogene family [Source:HGNC Symbol;Acc:HGNC:9764]	11.5835	0.111952	0.593051	0.188772	0.850271	0.958264
ENSG00000125398	SOX9	SRY-box transcription factor 9 [Source:HGNC Symbol;Acc:HGNC:11204]	11.0347	-0.649407	0.552975	-1.17439	0.24024	0.587961
ENSG00000125691	RPL23	ribosomal protein L23 [Source:HGNC Symbol;Acc:HGNC:10316]	99.8473	-0.371366	0.249637	-1.48762	0.136851	0.433897
ENSG00000125746	EML2	EMAP like 2 [Source:HGNC Symbol;Acc:HGNC:18035]	212.934	0.0704568	0.213906	0.329382	0.741867	0.936837
ENSG00000125798	FOXA2	forkhead box A2 [Source:HGNC Symbol;Acc:HGNC:5022]	14.271	0.413043	0.497993	0.829414	0.40687	0.765171
ENSG00000125968	ID1	inhibitor of DNA binding 1, HLH protein [Source:HGNC Symbol;Acc:HGNC:5360]	20.8088	-0.653698	0.465933	-1.40299	0.160621	0.466581
ENSG00000126070	AGO3	argonaute RISC catalytic component 3 [Source:HGNC Symbol;Acc:HGNC:18421]	17.6482	0.456246	0.446083	1.02278	0.306411	0.673017
ENSG00000126261	UBA2	ubiquitin like modifier activating enzyme 2 [Source:HGNC Symbol;Acc:HGNC:30661]	15.7112	-0.535625	0.4705	-1.13842	0.254947	0.609495
ENSG00000126653	NSRP1	nuclear speckle splicing regulatory protein 1 [Source:HGNC Symbol;Acc:HGNC:25305]	26657.5	-0.363169	0.168598	-2.15405	0.0312361	0.182962
ENSG00000127022	CANX	calnexin [Source:HGNC Symbol;Acc:HGNC:1473]	15.0349	0.341193	0.47621	0.716476	0.473698	0.814742
ENSG00000127184	COX7C	cytochrome c oxidase subunit 7C [Source:HGNC Symbol;Acc:HGNC:2292]	76.866	-0.143286	0.269417	-0.531838	0.594838	0.891115
ENSG00000128191	DGCR8	DGCR8 microprocessor complex subunit [Source:HGNC Symbol;Acc:HGNC:2847]	71.9571	-0.551598	0.276357	-1.99596	0.0459381	0.234229
ENSG00000128512	DOCK4	dedicator of cytokinesis 4 [Source:HGNC Symbol;Acc:HGNC:19192]	23.0563	0.222426	0.414573	0.536518	0.5916	0.891115
ENSG00000129493	HEATR5A	HEAT repeat containing 5A [Source:HGNC Symbol;Acc:HGNC:20276]	17.5379	0.50814	0.451984	1.12424	0.26091	0.619765
ENSG00000130164	LDLR	low density lipoprotein receptor [Source:HGNC Symbol;Acc:HGNC:6547]	12.1436	-0.735403	0.574006	-1.28118	0.200132	0.531422
ENSG00000130449	ZSWIM6	zinc finger SWIM-type containing 6 [Source:HGNC Symbol;Acc:HGNC:29316]	73.3581	-0.662867	0.291368	-2.27502	0.0229049	0.144935
ENSG00000130513	GDF15	growth differentiation factor 15 [Source:HGNC Symbol;Acc:HGNC:30142]	14.3969	-0.505768	0.485624	-1.04148	0.297653	0.666464
ENSG00000130517	PGPEP1	pyroglutamyl-peptidase I [Source:HGNC Symbol;Acc:HGNC:13568]	22.095	-3.35674	1.3475	-2.49108	0.0127355	0.0971167
ENSG00000130522	JUND	JunD proto-oncogene, AP-1 transcription factor subunit [Source:HGNC Symbol;Acc:HGNC:6206]	10.7027	-0.167407	0.559359	-0.299284	0.764723	0.94271
ENSG00000130699	TAF4	TATA-box binding protein associated factor 4 [Source:HGNC Symbol;Acc:HGNC:11537]	248.144	0.0689182	0.205551	0.335285	0.73741	0.936837
ENSG00000130826	DKC1	dyskerin pseudouridine synthase 1 [Source:HGNC Symbol;Acc:HGNC:2890]	21.1251	0.21128	0.417637	0.505895	0.61293	0.897074
ENSG00000130876	SLC7A10	solute carrier family 7 member 10 [Source:HGNC Symbol;Acc:HGNC:11058]	25.2312	0.625879	0.381216	1.64179	0.100633	0.37224
ENSG00000131013	PPIL4	peptidylprolyl isomerase like 4 [Source:HGNC Symbol;Acc:HGNC:15702]	14.6925	-0.454278	0.491653	-0.92398	0.355497	0.722818
ENSG00000131051	RBM39	RNA binding motif protein 39 [Source:HGNC Symbol;Acc:HGNC:15923]	10.8526	-0.0810429	0.571092	-0.141909	0.887152	0.968166
ENSG00000131584	ACAP3	ArfGAP with coiled-coil, ankyrin repeat and PH domains 3 [Source:HGNC Symbol;Acc:HGNC:16754]	24.8047	0.363702	0.403289	0.901838	0.367143	0.727223
ENSG00000132153	DHX30	DExH-box helicase 30 [Source:HGNC Symbol;Acc:HGNC:16716]	38.4171	-1.11006	0.338997	-3.27453	0.00105837	0.0158969
ENSG00000132388	UBE2G1	ubiquitin conjugating enzyme E2 G1 [Source:HGNC Symbol;Acc:HGNC:12482]	23.6931	1.08028	1.03967	1.03907	0.298773	0.666464
ENSG00000132475	H3-3B	H3.3 histone B [Source:HGNC Symbol;Acc:HGNC:4765]	10.9965	-0.424291	0.558409	-0.759821	0.447362	0.785392
ENSG00000133112	TPT1	tumor protein, translationally-controlled 1 [Source:HGNC Symbol;Acc:HGNC:12022]	79.555	0.910531	0.281449	3.23516	0.00121576	0.0177238
ENSG00000133316	WDR74	WD repeat domain 74 [Source:HGNC Symbol;Acc:HGNC:25529]	1265.89	0.252343	0.203923	1.23745	0.215922	0.550159
ENSG00000133639	BTG1	BTG anti-proliferation factor 1 [Source:HGNC Symbol;Acc:HGNC:1130]	12.9938	0.807893	0.526972	1.53308	0.125255	0.413295
ENSG00000134294	SLC38A2	solute carrier family 38 member 2 [Source:HGNC Symbol;Acc:HGNC:13448]	22.5325	0.348081	0.411243	0.846412	0.397323	0.758433
ENSG00000134644	PUM1	pumilio RNA binding family member 1 [Source:HGNC Symbol;Acc:HGNC:14957]	106.646	-0.285357	0.247324	-1.15378	0.248591	0.598146
ENSG00000134686	PHC2	polyhomeotic homolog 2 [Source:HGNC Symbol;Acc:HGNC:3183]	17.232	-0.31037	0.475437	-0.652809	0.51388	0.84973
ENSG00000134824	FADS2	fatty acid desaturase 2 [Source:HGNC Symbol;Acc:HGNC:3575]	20.2887	0.697644	0.421362	1.65569	0.0977852	0.370935
ENSG00000135486	HNRNPA1	heterogeneous nuclear ribonucleoprotein A1 [Source:HGNC Symbol;Acc:HGNC:5031]	16.0674	-0.0938031	0.467527	-0.200637	0.840983	0.958264
ENSG00000135549	PKIB	cAMP-dependent protein kinase inhibitor beta [Source:HGNC Symbol;Acc:HGNC:9018]	19.2644	1.10034	0.445174	2.47171	0.0134469	0.100988
ENSG00000135697	BCO1	beta-carotene oxygenase 1 [Source:HGNC Symbol;Acc:HGNC:13815]	34.8527	-0.0654439	0.369464	-0.177132	0.859405	0.959481
ENSG00000135821	GLUL	glutamate-ammonia ligase [Source:HGNC Symbol;Acc:HGNC:4341]	19.464	-0.0115395	0.428498	-0.02693	0.978516	0.994141
ENSG00000136153	LMO7	LIM domain 7 [Source:HGNC Symbol;Acc:HGNC:6646]	13.6126	0.638781	0.514273	1.2421	0.214198	0.54935
ENSG00000136450	SRSF1	serine and arginine rich splicing factor 1 [Source:HGNC Symbol;Acc:HGNC:10780]	63.0751	0.89016	0.27621	3.22277	0.00126958	0.0181352
ENSG00000136932	TRMO	tRNA methyltransferase O [Source:HGNC Symbol;Acc:HGNC:30967]	21.3601	-0.0122279	0.429406	-0.0284764	0.977282	0.994141
ENSG00000137073	UBAP2	ubiquitin associated protein 2 [Source:HGNC Symbol;Acc:HGNC:14185]	231.445	-0.0358623	0.20511	-0.174844	0.861202	0.960055
ENSG00000137331	IER3	immediate early response 3 [Source:HGNC Symbol;Acc:HGNC:5392]	13.1895	0.62362	0.56537	1.10303	0.270014	0.628391
ENSG00000137491	SLCO2B1	solute carrier organic anion transporter family member 2B1 [Source:HGNC Symbol;Acc:HGNC:10962]	13.0966	1.1998	0.539618	2.22342	0.0261876	0.161254
ENSG00000137818	RPLP1	ribosomal protein lateral stalk subunit P1 [Source:HGNC Symbol;Acc:HGNC:10372]	13.3332	0.134114	0.550511	0.243618	0.807527	0.945824
ENSG00000137819	PAQR5	progestin and adipoQ receptor family member 5 [Source:HGNC Symbol;Acc:HGNC:29645]	73.8345	-0.982796	0.304378	-3.22886	0.00124283	0.0179426
ENSG00000137948	BRDT	bromodomain testis associated [Source:HGNC Symbol;Acc:HGNC:1105]	11.4138	0.0733944	0.583169	0.125855	0.899847	0.971788
ENSG00000137955	RABGGTB	Rab geranylgeranyltransferase subunit beta [Source:HGNC Symbol;Acc:HGNC:9796]	23035.5	0.421946	0.18103	2.3308	0.0197638	0.130617
ENSG00000138032	PPM1B	protein phosphatase, Mg2+/Mn2+ dependent 1B [Source:HGNC Symbol;Acc:HGNC:9276]	21.1276	0.218221	0.421208	0.518083	0.604401	0.897074
ENSG00000139163	ETNK1	ethanolamine kinase 1 [Source:HGNC Symbol;Acc:HGNC:24649]	12.5102	0.752867	0.519858	1.44822	0.147556	0.455945
ENSG00000139318	DUSP6	dual specificity phosphatase 6 [Source:HGNC Symbol;Acc:HGNC:3072]	20.7176	0.670515	0.442349	1.51581	0.129568	0.422517
ENSG00000139644	TMBIM6	transmembrane BAX inhibitor motif containing 6 [Source:HGNC Symbol;Acc:HGNC:11723]	11.0097	0.139702	0.574011	0.243378	0.807713	0.945824
ENSG00000139915	MDGA2	MAM domain containing glycosylphosphatidylinositol anchor 2 [Source:HGNC Symbol;Acc:HGNC:19835]	16.9265	0.428079	0.491046	0.871769	0.383334	0.743741
ENSG00000140092	FBLN5	fibulin 5 [Source:HGNC Symbol;Acc:HGNC:3602]	67.3426	-0.711123	0.304846	-2.33273	0.0196623	0.130526
ENSG00000140988	RPS2	ribosomal protein S2 [Source:HGNC Symbol;Acc:HGNC:10404]	655.293	0.329266	0.179147	1.83796	0.0660683	0.293313
ENSG00000141034	GID4	GID complex subunit 4 homolog [Source:HGNC Symbol;Acc:HGNC:28453]	47.8884	1.13307	1.01067	1.12111	0.262239	0.62012
ENSG00000141232	TOB1	transducer of ERBB2, 1 [Source:HGNC Symbol;Acc:HGNC:11979]	11.0201	-0.642089	0.567068	-1.13229	0.25751	0.614636
ENSG00000141367	CLTC	clathrin heavy chain [Source:HGNC Symbol;Acc:HGNC:2092]	13.5808	0.0177749	0.498523	0.0356552	0.971557	0.994141
ENSG00000141736	ERBB2	erb-b2 receptor tyrosine kinase 2 [Source:HGNC Symbol;Acc:HGNC:3430]	2490.05	-0.543165	0.178959	-3.03513	0.0024043	0.0280509
ENSG00000142002	DPP9	dipeptidyl peptidase 9 [Source:HGNC Symbol;Acc:HGNC:18648]	180.745	-0.23465	0.225995	-1.0383	0.29913	0.666464
ENSG00000142279	WTIP	WT1 interacting protein [Source:HGNC Symbol;Acc:HGNC:20964]	10.7182	0.378681	0.553698	0.683913	0.49403	0.832906
ENSG00000142534	RPS11	ribosomal protein S11 [Source:HGNC Symbol;Acc:HGNC:10384]	110.806	0.633126	0.253016	2.50232	0.0123382	0.0954521
ENSG00000142541	RPL13A	ribosomal protein L13a [Source:HGNC Symbol;Acc:HGNC:10304]	5321.57	0.690615	0.162683	4.24515	2.18446e-05	0.000984329
ENSG00000142937	RPS8	ribosomal protein S8 [Source:HGNC Symbol;Acc:HGNC:10441]	15934.5	0.344342	0.238206	1.44556	0.1483	0.455945
ENSG00000143569	UBAP2L	ubiquitin associated protein 2 like [Source:HGNC Symbol;Acc:HGNC:29877]	68.4597	-0.0305715	0.270017	-0.113221	0.909856	0.977505
ENSG00000143630	HCN3	hyperpolarization activated cyclic nucleotide gated potassium channel 3 [Source:HGNC Symbol;Acc:HGNC:19183]	105.123	-0.0361263	0.345751	-0.104486	0.916783	0.977505
ENSG00000143842	SOX13	SRY-box transcription factor 13 [Source:HGNC Symbol;Acc:HGNC:11192]	11.3609	1.13459	0.567538	1.99913	0.0455938	0.234229
ENSG00000144029	MRPS5	mitochondrial ribosomal protein S5 [Source:HGNC Symbol;Acc:HGNC:14498]	10.4178	0.289152	0.569661	0.507587	0.611743	0.897074
ENSG00000144713	RPL32	ribosomal protein L32 [Source:HGNC Symbol;Acc:HGNC:10336]	1173.65	0.278577	0.177742	1.56731	0.117041	0.402872
ENSG00000144802	NFKBIZ	NFKB inhibitor zeta [Source:HGNC Symbol;Acc:HGNC:29805]	12.6086	0.192117	0.511954	0.375262	0.707466	0.922559
ENSG00000145425	RPS3A	ribosomal protein S3A [Source:HGNC Symbol;Acc:HGNC:10421]	309.988	0.428089	0.236448	1.8105	0.0702179	0.304963
ENSG00000145868	FBXO38	F-box protein 38 [Source:HGNC Symbol;Acc:HGNC:28844]	15.1849	0.0818751	0.483116	0.169473	0.865425	0.960055
ENSG00000145916	RMND5B	required for meiotic nuclear division 5 homolog B [Source:HGNC Symbol;Acc:HGNC:26181]	10.7574	-0.187032	0.547455	-0.34164	0.732622	0.936837
ENSG00000146834	MEPCE	methylphosphate capping enzyme [Source:HGNC Symbol;Acc:HGNC:20247]	13.5391	0.460099	0.506052	0.909192	0.363249	0.726009
ENSG00000147274	RBMX	RNA binding motif protein X-linked [Source:HGNC Symbol;Acc:HGNC:9910]	33834.5	0.342854	0.170578	2.00996	0.0444355	0.230228
ENSG00000147403	RPL10	ribosomal protein L10 [Source:HGNC Symbol;Acc:HGNC:10298]	61.5091	0.524535	0.287825	1.82241	0.0683927	0.3
ENSG00000148120	AOPEP	aminopeptidase O (putative) [Source:HGNC Symbol;Acc:HGNC:1361]	2051	-0.556432	0.206061	-2.70032	0.00692721	0.0635066
ENSG00000148303	RPL7A	ribosomal protein L7a [Source:HGNC Symbol;Acc:HGNC:10364]	8448.77	-0.053317	0.183171	-0.291078	0.770992	0.94271
ENSG00000148357	HMCN2	hemicentin 2 [Source:HGNC Symbol;Acc:HGNC:21293]	12.5396	-0.859003	0.546655	-1.57138	0.116094	0.402363
ENSG00000148358	GPR107	G protein-coupled receptor 107 [Source:HGNC Symbol;Acc:HGNC:17830]	16.3361	-0.0512879	0.464036	-0.110526	0.911992	0.977505
ENSG00000148730	EIF4EBP2	eukaryotic translation initiation factor 4E binding protein 2 [Source:HGNC Symbol;Acc:HGNC:3289]	13.0215	-0.167724	0.519766	-0.322691	0.746929	0.936837
ENSG00000148773	MKI67	marker of proliferation Ki-67 [Source:HGNC Symbol;Acc:HGNC:7107]	11.0167	-0.0986142	0.604545	-0.163121	0.870423	0.961764
ENSG00000149273	RPS3	ribosomal protein S3 [Source:HGNC Symbol;Acc:HGNC:10420]	1162.4	0.757916	0.187902	4.03357	5.49349e-05	0.00194496
ENSG00000149485	FADS1	fatty acid desaturase 1 [Source:HGNC Symbol;Acc:HGNC:3574]	357.578	0.248668	0.193288	1.28651	0.198264	0.528349
ENSG00000149532	CPSF7	cleavage and polyadenylation specific factor 7 [Source:HGNC Symbol;Acc:HGNC:30098]	10.8555	-0.39232	0.560313	-0.700179	0.483815	0.821271
ENSG00000149582	TMEM25	transmembrane protein 25 [Source:HGNC Symbol;Acc:HGNC:25890]	74.0731	1.12221	0.29206	3.84238	0.000121847	0.00377472
ENSG00000150995	ITPR1	inositol 1,4,5-trisphosphate receptor type 1 [Source:HGNC Symbol;Acc:HGNC:6180]	10.5368	-0.151091	0.563525	-0.268117	0.788609	0.945824
ENSG00000151914	DST	dystonin [Source:HGNC Symbol;Acc:HGNC:1090]	11.7557	-0.466718	0.576357	-0.809772	0.418071	0.770438
ENSG00000152127	MGAT5	alpha-1,6-mannosylglycoprotein 6-beta-N-acetylglucosaminyltransferase [Source:HGNC Symbol;Acc:HGNC:7049]	13.5559	0.102736	0.500397	0.205309	0.837331	0.957729
ENSG00000152292	SH2D6	SH2 domain containing 6 [Source:HGNC Symbol;Acc:HGNC:30439]	23.714	-1.38435	0.417647	-3.31465	0.000917591	0.0146716
ENSG00000152518	ZFP36L2	ZFP36 ring finger protein like 2 [Source:HGNC Symbol;Acc:HGNC:1108]	24.4613	-0.252995	0.409566	-0.617714	0.536764	0.865907
ENSG00000152620	NADK2	NAD kinase 2, mitochondrial [Source:HGNC Symbol;Acc:HGNC:26404]	10.5815	-0.174528	0.5813	-0.300238	0.763996	0.94271
ENSG00000153187	HNRNPU	heterogeneous nuclear ribonucleoprotein U [Source:HGNC Symbol;Acc:HGNC:5048]	19.0573	0.214046	0.42506	0.503568	0.614565	0.898583
ENSG00000153560	UBP1	upstream binding protein 1 [Source:HGNC Symbol;Acc:HGNC:12507]	19.9697	-0.215251	0.424282	-0.50733	0.611923	0.897074
ENSG00000154518	ATP5MC3	ATP synthase membrane subunit c locus 3 [Source:HGNC Symbol;Acc:HGNC:843]	100.139	-0.821182	0.252359	-3.25402	0.00113784	0.0167522
ENSG00000155380	SLC16A1	solute carrier family 16 member 1 [Source:HGNC Symbol;Acc:HGNC:10922]	13.6317	0.046405	0.494752	0.0937945	0.925272	0.979274
ENSG00000155506	LARP1	La ribonucleoprotein 1, translational regulator [Source:HGNC Symbol;Acc:HGNC:29531]	15.6363	0.703185	0.483194	1.45528	0.14559	0.453864
ENSG00000155542	SETD9	SET domain containing 9 [Source:HGNC Symbol;Acc:HGNC:28508]	12.4379	-0.401138	0.525064	-0.763979	0.44488	0.78474
ENSG00000156313	RPGR	retinitis pigmentosa GTPase regulator [Source:HGNC Symbol;Acc:HGNC:10295]	12.6662	-0.263178	0.515123	-0.510903	0.609419	0.897074
ENSG00000156508	EEF1A1	eukaryotic translation elongation factor 1 alpha 1 [Source:HGNC Symbol;Acc:HGNC:3189]	12.9623	0.00633812	0.517032	0.0122587	0.990219	0.99734
ENSG00000156976	EIF4A2	eukaryotic translation initiation factor 4A2 [Source:HGNC Symbol;Acc:HGNC:3284]	119603	0.440087	0.167972	2.62	0.00879299	0.0745828
ENSG00000157087	ATP2B2	ATPase plasma membrane Ca2+ transporting 2 [Source:HGNC Symbol;Acc:HGNC:815]	13.5543	0.0846563	0.53295	0.158845	0.873791	0.962465
ENSG00000157800	SLC37A3	solute carrier family 37 member 3 [Source:HGNC Symbol;Acc:HGNC:20651]	58.0478	-0.278683	0.322212	-0.864907	0.38709	0.747395
ENSG00000159217	IGF2BP1	insulin like growth factor 2 mRNA binding protein 1 [Source:HGNC Symbol;Acc:HGNC:28866]	13.5501	0.282543	0.497445	0.567988	0.570043	0.883894
ENSG00000159840	ZYX	zyxin [Source:HGNC Symbol;Acc:HGNC:13200]	22.9955	0.0729765	0.417659	0.174728	0.861294	0.960055
ENSG00000160075	SSU72	SSU72 homolog, RNA polymerase II CTD phosphatase [Source:HGNC Symbol;Acc:HGNC:25016]	19.9952	-0.417205	0.433241	-0.962985	0.335555	0.700801
ENSG00000160685	ZBTB7B	zinc finger and BTB domain containing 7B [Source:HGNC Symbol;Acc:HGNC:18668]	11.0646	0.119775	0.613871	0.195114	0.845303	0.958264
ENSG00000161011	SQSTM1	sequestosome 1 [Source:HGNC Symbol;Acc:HGNC:11280]	10.8809	1.04259	0.55975	1.8626	0.0625191	0.285172
ENSG00000161036	LRWD1	leucine rich repeats and WD repeat domain containing 1 [Source:HGNC Symbol;Acc:HGNC:21769]	40.9664	-0.289428	0.319635	-0.905495	0.365203	0.72647
ENSG00000161547	SRSF2	serine and arginine rich splicing factor 2 [Source:HGNC Symbol;Acc:HGNC:10783]	10.7006	-1.04757	0.574458	-1.82359	0.0682145	0.3
ENSG00000161960	EIF4A1	eukaryotic translation initiation factor 4A1 [Source:HGNC Symbol;Acc:HGNC:3282]	2619.02	0.400158	0.169436	2.3617	0.0181912	0.124084
ENSG00000162599	NFIA	nuclear factor I A [Source:HGNC Symbol;Acc:HGNC:7784]	14.6267	0.45661	0.48301	0.945341	0.344485	0.71047
ENSG00000163083	INHBB	inhibin subunit beta B [Source:HGNC Symbol;Acc:HGNC:6067]	4915.45	-0.411376	0.259508	-1.58522	0.112917	0.400734
ENSG00000163440	PDCL2	phosducin like 2 [Source:HGNC Symbol;Acc:HGNC:29524]	11.7219	-0.0853267	0.571874	-0.149205	0.881391	0.966541
ENSG00000163597	SNHG16	small nucleolar RNA host gene 16 [Source:HGNC Symbol;Acc:HGNC:44352]	1188.71	-0.115714	0.184408	-0.627487	0.53034	0.863763
ENSG00000163631	ALB	albumin [Source:HGNC Symbol;Acc:HGNC:399]	31.0749	0.566891	0.362359	1.56444	0.117714	0.403318
ENSG00000163882	POLR2H	RNA polymerase II subunit H [Source:HGNC Symbol;Acc:HGNC:9195]	82.2627	0.0803369	0.303395	0.264793	0.791169	0.945824
ENSG00000163938	GNL3	G protein nucleolar 3 [Source:HGNC Symbol;Acc:HGNC:29931]	6096.23	0.430287	0.254542	1.69043	0.0909448	0.35566
ENSG00000164032	H2AZ1	H2A.Z variant histone 1 [Source:HGNC Symbol;Acc:HGNC:4741]	11.9131	0.230086	0.547406	0.42032	0.674251	0.915049
ENSG00000164442	CITED2	Cbp/p300 interacting transactivator with Glu/Asp rich carboxy-terminal domain 2 [Source:HGNC Symbol;Acc:HGNC:1987]	12.7269	-0.127433	0.510999	-0.24938	0.803067	0.945824
ENSG00000164611	PTTG1	PTTG1 regulator of sister chromatid separation, securin [Source:HGNC Symbol;Acc:HGNC:9690]	10.6207	-0.926893	0.576529	-1.60771	0.107898	0.391329
ENSG00000164692	COL1A2	collagen type I alpha 2 chain [Source:HGNC Symbol;Acc:HGNC:2198]	11.594	-0.559978	0.624558	-0.896598	0.369934	0.730533
ENSG00000165119	HNRNPK	heterogeneous nuclear ribonucleoprotein K [Source:HGNC Symbol;Acc:HGNC:5044]	10619.3	-0.0382345	0.174634	-0.218941	0.826696	0.952205
ENSG00000165462	PHOX2A	paired like homeobox 2A [Source:HGNC Symbol;Acc:HGNC:691]	104.144	-0.168329	0.315728	-0.533144	0.593934	0.891115
ENSG00000165507	DEPP1	DEPP1 autophagy regulator [Source:HGNC Symbol;Acc:HGNC:23355]	13.6035	0.226236	0.514782	0.439478	0.660315	0.910397
ENSG00000165801	ARHGEF40	Rho guanine nucleotide exchange factor 40 [Source:HGNC Symbol;Acc:HGNC:25516]	21.3831	-0.137914	0.430294	-0.320512	0.74858	0.936837
ENSG00000165813	CCDC186	coiled-coil domain containing 186 [Source:HGNC Symbol;Acc:HGNC:24349]	142.395	-0.285908	0.230256	-1.2417	0.214349	0.54935
ENSG00000166012	TAF1D	TATA-box binding protein associated factor, RNA polymerase I subunit D [Source:HGNC Symbol;Acc:HGNC:28759]	6765.3	0.669627	0.183687	3.64547	0.000266902	0.00748835
ENSG00000166226	CCT2	chaperonin containing TCP1 subunit 2 [Source:HGNC Symbol;Acc:HGNC:1615]	15.8334	0.102895	0.461942	0.222744	0.823735	0.95122
ENSG00000166233	ARIH1	ariadne RBR E3 ubiquitin protein ligase 1 [Source:HGNC Symbol;Acc:HGNC:689]	10.9832	0.258282	0.552424	0.467543	0.640112	0.903114
ENSG00000166441	RPL27A	ribosomal protein L27a [Source:HGNC Symbol;Acc:HGNC:10329]	131.12	-0.0488197	0.325274	-0.150088	0.880695	0.96649
ENSG00000166508	MCM7	minichromosome maintenance complex component 7 [Source:HGNC Symbol;Acc:HGNC:6950]	10.8312	0.902759	0.574598	1.57111	0.116156	0.402363
ENSG00000166920	C15orf48	chromosome 15 open reading frame 48 [Source:HGNC Symbol;Acc:HGNC:29898]	11.3086	-0.016586	0.562628	-0.0294796	0.976482	0.994141
ENSG00000167196	FBXO22	F-box protein 22 [Source:HGNC Symbol;Acc:HGNC:13593]	17.5845	-0.175407	0.486818	-0.360314	0.718613	0.926938
ENSG00000167395	ZNF646	zinc finger protein 646 [Source:HGNC Symbol;Acc:HGNC:29004]	64.4277	0.00991678	0.299505	0.0331105	0.973586	0.994141
ENSG00000167470	MIDN	midnolin [Source:HGNC Symbol;Acc:HGNC:16298]	14.3135	0.679651	0.52662	1.29059	0.196846	0.525512
ENSG00000167526	RPL13	ribosomal protein L13 [Source:HGNC Symbol;Acc:HGNC:10303]	48057.4	0.279706	0.169472	1.65046	0.0988492	0.371184
ENSG00000167658	EEF2	eukaryotic translation elongation factor 2 [Source:HGNC Symbol;Acc:HGNC:3214]	8366.91	-0.0900048	0.171429	-0.525027	0.599564	0.893339
ENSG00000167747	C19orf48	chromosome 19 open reading frame 48 [Source:HGNC Symbol;Acc:HGNC:29667]	10081.4	0.57928	0.187451	3.0903	0.00199956	0.0246505
ENSG00000167968	DNASE1L2	deoxyribonuclease 1 like 2 [Source:HGNC Symbol;Acc:HGNC:2958]	15.1883	0.194962	0.477908	0.407949	0.683311	0.916518
ENSG00000167996	FTH1	ferritin heavy chain 1 [Source:HGNC Symbol;Acc:HGNC:3976]	13.4735	0.402521	0.499674	0.805568	0.420492	0.770438
ENSG00000168028	RPSA	ribosomal protein SA [Source:HGNC Symbol;Acc:HGNC:6502]	277.838	0.256571	0.206223	1.24415	0.213446	0.549125
ENSG00000168036	CTNNB1	catenin beta 1 [Source:HGNC Symbol;Acc:HGNC:2514]	14.5595	-0.140027	0.483194	-0.289795	0.771973	0.94271
ENSG00000168137	SETD5	SET domain containing 5 [Source:HGNC Symbol;Acc:HGNC:25566]	11.1839	-0.549961	0.558795	-0.984192	0.325021	0.689726
ENSG00000168237	GLYCTK	glycerate kinase [Source:HGNC Symbol;Acc:HGNC:24247]	22.7465	-0.938503	0.419622	-2.23654	0.0253162	0.157511
ENSG00000168298	H1-4	H1.4 linker histone, cluster member [Source:HGNC Symbol;Acc:HGNC:4718]	10.5985	0.733017	0.57876	1.26653	0.205323	0.540382
ENSG00000168385	SEPTIN2	septin 2 [Source:HGNC Symbol;Acc:HGNC:7729]	10.7046	-0.279395	0.558799	-0.499993	0.61708	0.898889
ENSG00000168528	SERINC2	serine incorporator 2 [Source:HGNC Symbol;Acc:HGNC:23231]	19.5295	1.36349	0.444405	3.06812	0.00215408	0.0258316
ENSG00000168906	MAT2A	methionine adenosyltransferase 2A [Source:HGNC Symbol;Acc:HGNC:6904]	30.5512	0.0753942	0.38261	0.197052	0.843787	0.958264
ENSG00000169045	HNRNPH1	heterogeneous nuclear ribonucleoprotein H1 [Source:HGNC Symbol;Acc:HGNC:5041]	86.4311	-0.0143627	0.261756	-0.0548706	0.956242	0.994141
ENSG00000169174	PCSK9	proprotein convertase subtilisin/kexin type 9 [Source:HGNC Symbol;Acc:HGNC:20001]	48.9635	0.046777	0.323666	0.144522	0.885088	0.967156
ENSG00000169710	FASN	fatty acid synthase [Source:HGNC Symbol;Acc:HGNC:3594]	13.7858	0.640766	0.492512	1.30102	0.193253	0.517779
ENSG00000170775	GPR37	G protein-coupled receptor 37 [Source:HGNC Symbol;Acc:HGNC:4494]	71.3746	-0.39109	0.274099	-1.42682	0.153631	0.457969
ENSG00000170776	AKAP13	A-kinase anchoring protein 13 [Source:HGNC Symbol;Acc:HGNC:371]	425.648	-0.430245	0.207551	-2.07296	0.038176	0.206428
ENSG00000171456	ASXL1	ASXL transcriptional regulator 1 [Source:HGNC Symbol;Acc:HGNC:18318]	11.1617	-0.0063764	0.543155	-0.0117396	0.990633	0.99734
ENSG00000171759	PAH	phenylalanine hydroxylase [Source:HGNC Symbol;Acc:HGNC:8582]	10.5632	0.213351	0.562383	0.37937	0.704413	0.922559
ENSG00000171793	CTPS1	CTP synthase 1 [Source:HGNC Symbol;Acc:HGNC:2519]	211.448	0.230605	0.244189	0.944368	0.344981	0.710509
ENSG00000171862	PTEN	phosphatase and tensin homolog [Source:HGNC Symbol;Acc:HGNC:9588]	61.2342	0.332536	0.280254	1.18655	0.235405	0.58051
ENSG00000172071	EIF2AK3	eukaryotic translation initiation factor 2 alpha kinase 3 [Source:HGNC Symbol;Acc:HGNC:3255]	68.5685	0.0998412	0.271487	0.367757	0.713055	0.92398
ENSG00000172238	ATOH1	atonal bHLH transcription factor 1 [Source:HGNC Symbol;Acc:HGNC:797]	29.1338	-0.730243	0.377002	-1.93697	0.0527486	0.2498
ENSG00000172269	DPAGT1	dolichyl-phosphate N-acetylglucosaminephosphotransferase 1 [Source:HGNC Symbol;Acc:HGNC:2995]	17.3746	0.229511	0.445559	0.515109	0.606477	0.897074
ENSG00000172932	ANKRD13D	ankyrin repeat domain 13D [Source:HGNC Symbol;Acc:HGNC:27880]	18.6332	-0.0795211	0.461664	-0.172249	0.863242	0.960055
ENSG00000173120	KDM2A	lysine demethylase 2A [Source:HGNC Symbol;Acc:HGNC:13606]	47.1895	0.0679161	0.317025	0.21423	0.830368	0.95348
ENSG00000173209	AHSA2P	activator of HSP90 ATPase homolog 2, pseudogene [Source:HGNC Symbol;Acc:HGNC:20437]	34.0132	-0.399719	0.356902	-1.11997	0.262727	0.62012
ENSG00000173915	ATP5MD	ATP synthase membrane subunit DAPIT [Source:HGNC Symbol;Acc:HGNC:30889]	2930.02	-0.326622	0.180544	-1.8091	0.0704354	0.304963
ENSG00000174437	ATP2A2	ATPase sarcoplasmic/endoplasmic reticulum Ca2+ transporting 2 [Source:HGNC Symbol;Acc:HGNC:812]	11.7426	-0.327256	0.530452	-0.616937	0.537276	0.865907
ENSG00000174444	RPL4	ribosomal protein L4 [Source:HGNC Symbol;Acc:HGNC:10353]	192364	0.308725	0.175062	1.76352	0.0778136	0.322309
ENSG00000174748	RPL15	ribosomal protein L15 [Source:HGNC Symbol;Acc:HGNC:10306]	13.1584	0.292781	0.528667	0.553809	0.57971	0.884305
ENSG00000175061	SNHG29	small nucleolar RNA host gene 29 [Source:HGNC Symbol;Acc:HGNC:28619]	286399	0.808247	0.176083	4.59015	4.42931e-06	0.000235228
ENSG00000175110	MRPS22	mitochondrial ribosomal protein S22 [Source:HGNC Symbol;Acc:HGNC:14508]	83.2454	0.0991701	0.254488	0.389685	0.696769	0.918634
ENSG00000175874	CREG2	cellular repressor of E1A stimulated genes 2 [Source:HGNC Symbol;Acc:HGNC:14272]	43.8423	-0.402057	0.318138	-1.26378	0.206309	0.542017
ENSG00000176095	IP6K1	inositol hexakisphosphate kinase 1 [Source:HGNC Symbol;Acc:HGNC:18360]	12.9265	3.91477	1.55374	2.51957	0.0117497	0.0929353
ENSG00000176986	SEC24C	SEC24 homolog C, COPII coat complex component [Source:HGNC Symbol;Acc:HGNC:10705]	42.6474	-0.306442	0.335171	-0.914284	0.360568	0.724546
ENSG00000177138	FAM9B	family with sequence similarity 9 member B [Source:HGNC Symbol;Acc:HGNC:18404]	153.995	-0.361377	0.309806	-1.16646	0.243428	0.590475
ENSG00000177410	ZFAS1	ZNFX1 antisense RNA 1 [Source:HGNC Symbol;Acc:HGNC:33101]	31277.6	0.517625	0.185914	2.78422	0.00536564	0.0535483
ENSG00000177600	RPLP2	ribosomal protein lateral stalk subunit P2 [Source:HGNC Symbol;Acc:HGNC:10377]	11.4053	0.0995259	0.557652	0.178473	0.858351	0.959481
ENSG00000177721	ANXA2R	annexin A2 receptor [Source:HGNC Symbol;Acc:HGNC:33463]	16.027	-0.365119	0.479779	-0.761015	0.446648	0.785392
ENSG00000177731	FLII	FLII actin remodeling protein [Source:HGNC Symbol;Acc:HGNC:3750]	55.9982	-0.369618	0.296012	-1.24866	0.21179	0.54865
ENSG00000178252	WDR6	WD repeat domain 6 [Source:HGNC Symbol;Acc:HGNC:12758]	11.218	-0.303394	0.538804	-0.563088	0.573375	0.884124
ENSG00000178971	CTC1	CST telomere replication complex component 1 [Source:HGNC Symbol;Acc:HGNC:26169]	34.0565	0.27563	0.340606	0.809234	0.41838	0.770438
ENSG00000178977	LINC00324	long intergenic non-protein coding RNA 324 [Source:HGNC Symbol;Acc:HGNC:26628]	70.6353	0.417751	0.270598	1.54381	0.122635	0.413295
ENSG00000178999	AURKB	aurora kinase B [Source:HGNC Symbol;Acc:HGNC:11390]	14.8859	0.115957	0.477265	0.242961	0.808036	0.945824
ENSG00000179029	TMEM107	transmembrane protein 107 [Source:HGNC Symbol;Acc:HGNC:28128]	823.773	-0.00872836	0.192648	-0.0453073	0.963862	0.994141
ENSG00000179218	CALR	calreticulin [Source:HGNC Symbol;Acc:HGNC:1455]	10.5587	-0.303939	0.577134	-0.526635	0.598447	0.892568
ENSG00000179832	MROH1	maestro heat like repeat family member 1 [Source:HGNC Symbol;Acc:HGNC:26958]	27.2112	1.58487	0.985603	1.60802	0.10783	0.391329
ENSG00000179933	C14orf119	chromosome 14 open reading frame 119 [Source:HGNC Symbol;Acc:HGNC:20270]	14.7495	0.258045	0.49373	0.522645	0.601221	0.894359
ENSG00000181123		novel transcript, antisense to SEC14L4	26.063	-1.64924	0.419287	-3.93344	8.37375e-05	0.00282512
ENSG00000181163	NPM1	nucleophosmin 1 [Source:HGNC Symbol;Acc:HGNC:7910]	13.0781	0.226607	0.526597	0.430324	0.66696	0.912668
ENSG00000181523	SGSH	N-sulfoglucosamine sulfohydrolase [Source:HGNC Symbol;Acc:HGNC:10818]	25.0531	-0.364751	0.395893	-0.921337	0.356874	0.723081
ENSG00000182180	MRPS16	mitochondrial ribosomal protein S16 [Source:HGNC Symbol;Acc:HGNC:14048]	26.5771	0.624169	0.410883	1.51909	0.12874	0.420738
ENSG00000182481	KPNA2	karyopherin subunit alpha 2 [Source:HGNC Symbol;Acc:HGNC:6395]	11.2845	-0.100691	0.56085	-0.179534	0.857519	0.959481
ENSG00000182827	ACBD3	acyl-CoA binding domain containing 3 [Source:HGNC Symbol;Acc:HGNC:15453]	33.3383	-0.322133	0.40472	-0.79594	0.426067	0.77101
ENSG00000182944	EWSR1	EWS RNA binding protein 1 [Source:HGNC Symbol;Acc:HGNC:3508]	17.605	0.0214822	0.46301	0.0463968	0.962994	0.994141
ENSG00000184009	ACTG1	actin gamma 1 [Source:HGNC Symbol;Acc:HGNC:144]	15.5567	-0.307363	0.505262	-0.608324	0.542973	0.86724
ENSG00000184678	H2BC21	H2B clustered histone 21 [Source:HGNC Symbol;Acc:HGNC:4760]	26.1362	-0.731088	0.409143	-1.78688	0.0739575	0.313319
ENSG00000184863	RBM33	RNA binding motif protein 33 [Source:HGNC Symbol;Acc:HGNC:27223]	15.0418	0.137003	0.495668	0.276401	0.78224	0.945684
ENSG00000185650	ZFP36L1	ZFP36 ring finger protein like 1 [Source:HGNC Symbol;Acc:HGNC:1107]	18.9693	1.45618	0.45848	3.1761	0.00149268	0.0204763
ENSG00000186185	KIF18B	kinesin family member 18B [Source:HGNC Symbol;Acc:HGNC:27102]	12.5538	-1.43521	0.551076	-2.60438	0.00920395	0.0764596
ENSG00000186480	INSIG1	insulin induced gene 1 [Source:HGNC Symbol;Acc:HGNC:6083]	25.6038	1.29123	0.41903	3.08147	0.00205979	0.0251058
ENSG00000186594	MIR22HG	MIR22 host gene [Source:HGNC Symbol;Acc:HGNC:28219]	2745.33	0.135624	0.176252	0.769486	0.441605	0.783612
ENSG00000188157	AGRN	agrin [Source:HGNC Symbol;Acc:HGNC:329]	24.5329	0.52584	0.400926	1.31156	0.189667	0.514663
ENSG00000188486	H2AX	H2A.X variant histone [Source:HGNC Symbol;Acc:HGNC:4739]	20.663	-0.165487	0.425347	-0.389065	0.697228	0.918634
ENSG00000188825	LINC00910	long intergenic non-protein coding RNA 910 [Source:HGNC Symbol;Acc:HGNC:44361]	117.55	-0.130997	0.24174	-0.541894	0.587892	0.891115
ENSG00000196199	MPHOSPH8	M-phase phosphoprotein 8 [Source:HGNC Symbol;Acc:HGNC:29810]	286.345	-0.0289676	0.282782	-0.102438	0.918409	0.977505
ENSG00000196205	EEF1A1P5	eukaryotic translation elongation factor 1 alpha 1 pseudogene 5 [Source:HGNC Symbol;Acc:HGNC:3200]	14.3163	-0.20807	0.493631	-0.42151	0.673383	0.915049
ENSG00000196233	LCOR	ligand dependent nuclear receptor corepressor [Source:HGNC Symbol;Acc:HGNC:29503]	11.8701	-0.0467483	0.556217	-0.0840468	0.933019	0.982439
ENSG00000196235	SUPT5H	SPT5 homolog, DSIF elongation factor subunit [Source:HGNC Symbol;Acc:HGNC:11469]	60.86	0.229204	0.285727	0.802179	0.422449	0.770438
ENSG00000196557	CACNA1H	calcium voltage-gated channel subunit alpha1 H [Source:HGNC Symbol;Acc:HGNC:1395]	48.4614	0.0920848	0.329451	0.27951	0.779854	0.945104
ENSG00000196581	AJAP1	adherens junctions associated protein 1 [Source:HGNC Symbol;Acc:HGNC:30801]	14.9155	0.196225	0.491479	0.399255	0.689705	0.916525
ENSG00000196756	SNHG17	small nucleolar RNA host gene 17 [Source:HGNC Symbol;Acc:HGNC:48600]	485.744	0.199737	0.202951	0.984167	0.325034	0.689726
ENSG00000196787	H2AC11	H2A clustered histone 11 [Source:HGNC Symbol;Acc:HGNC:4737]	18.7584	0.058865	0.462041	0.127402	0.898622	0.971788
ENSG00000197111	PCBP2	poly(rC) binding protein 2 [Source:HGNC Symbol;Acc:HGNC:8648]	11.2912	0.362196	0.535813	0.675975	0.499056	0.836637
ENSG00000197114	ZGPAT	zinc finger CCCH-type and G-patch domain containing [Source:HGNC Symbol;Acc:HGNC:15948]	46.5441	0.549348	0.320771	1.71258	0.086789	0.346923
ENSG00000197182	MIRLET7BHG	MIRLET7B host gene [Source:HGNC Symbol;Acc:HGNC:37189]	537.176	-0.880035	0.209193	-4.20682	2.5899e-05	0.0011327
ENSG00000197694	SPTAN1	spectrin alpha, non-erythrocytic 1 [Source:HGNC Symbol;Acc:HGNC:11273]	12.3123	-0.753025	0.537575	-1.40078	0.161279	0.466581
ENSG00000197837	H4-16	H4 histone 16 [Source:HGNC Symbol;Acc:HGNC:20510]	24.9114	-0.00102919	0.384114	-0.00267938	0.997862	0.999532
ENSG00000197989	SNHG12	small nucleolar RNA host gene 12 [Source:HGNC Symbol;Acc:HGNC:30062]	1235.54	0.70015	0.179199	3.90711	9.34056e-05	0.00295519
ENSG00000198242	RPL23A	ribosomal protein L23a [Source:HGNC Symbol;Acc:HGNC:10317]	47471.2	0.186914	0.211844	0.882317	0.377606	0.738815
ENSG00000198265	HELZ	helicase with zinc finger [Source:HGNC Symbol;Acc:HGNC:16878]	48.807	0.141292	0.310744	0.45469	0.649332	0.907845
ENSG00000198431	TXNRD1	thioredoxin reductase 1 [Source:HGNC Symbol;Acc:HGNC:12437]	17.7125	0.680371	0.443904	1.5327	0.12535	0.413295
ENSG00000198561	CTNND1	catenin delta 1 [Source:HGNC Symbol;Acc:HGNC:2515]	15.2245	-0.229721	0.485568	-0.473097	0.636144	0.903114
ENSG00000198563	DDX39B	DExD-box helicase 39B [Source:HGNC Symbol;Acc:HGNC:13917]	271.76	-0.0378748	0.197752	-0.191526	0.848113	0.958264
ENSG00000198695	MT-ND6	mitochondrially encoded NADH:ubiquinone oxidoreductase core subunit 6 [Source:HGNC Symbol;Acc:HGNC:7462]	601.447	-0.0664574	0.237438	-0.279894	0.779559	0.945104
ENSG00000198712	MT-CO2	mitochondrially encoded cytochrome c oxidase II [Source:HGNC Symbol;Acc:HGNC:7421]	256.436	0.323157	0.268283	1.20454	0.228382	0.573112
ENSG00000198727	MT-CYB	mitochondrially encoded cytochrome b [Source:HGNC Symbol;Acc:HGNC:7427]	131.271	0.169643	0.283662	0.598047	0.549808	0.86975
ENSG00000198744	MTCO3P12	MT-CO3 pseudogene 12 [Source:HGNC Symbol;Acc:HGNC:52042]	16.2381	0.218346	0.480595	0.454325	0.649595	0.907845
ENSG00000198763	MT-ND2	mitochondrially encoded NADH:ubiquinone oxidoreductase core subunit 2 [Source:HGNC Symbol;Acc:HGNC:7456]	95.9736	0.41713	0.300196	1.38953	0.164673	0.469998
ENSG00000198786	MT-ND5	mitochondrially encoded NADH:ubiquinone oxidoreductase core subunit 5 [Source:HGNC Symbol;Acc:HGNC:7461]	238.472	0.0693951	0.276292	0.251166	0.801686	0.945824
ENSG00000198804	MT-CO1	mitochondrially encoded cytochrome c oxidase I [Source:HGNC Symbol;Acc:HGNC:7419]	354.021	0.531153	0.303933	1.7476	0.0805335	0.329872
ENSG00000198840	MT-ND3	mitochondrially encoded NADH:ubiquinone oxidoreductase core subunit 3 [Source:HGNC Symbol;Acc:HGNC:7458]	99.1336	-0.046371	0.25643	-0.180833	0.856499	0.959481
ENSG00000198886	MT-ND4	mitochondrially encoded NADH:ubiquinone oxidoreductase core subunit 4 [Source:HGNC Symbol;Acc:HGNC:7459]	279.915	0.225642	0.31345	0.719866	0.471607	0.812607
ENSG00000198888	MT-ND1	mitochondrially encoded NADH:ubiquinone oxidoreductase core subunit 1 [Source:HGNC Symbol;Acc:HGNC:7455]	211.634	0.0890727	0.242453	0.36738	0.713335	0.92398
ENSG00000198899	MT-ATP6	mitochondrially encoded ATP synthase membrane subunit 6 [Source:HGNC Symbol;Acc:HGNC:7414]	102.181	0.249224	0.312093	0.798557	0.424547	0.77101
ENSG00000198938	MT-CO3	mitochondrially encoded cytochrome c oxidase III [Source:HGNC Symbol;Acc:HGNC:7422]	130.645	0.363481	0.279297	1.30141	0.193117	0.517779
ENSG00000198972	MIRLET7E	microRNA let-7e [Source:HGNC Symbol;Acc:HGNC:31482]	783.576	-0.285585	0.176768	-1.61559	0.106182	0.387944
ENSG00000198973	MIR375	microRNA 375 [Source:HGNC Symbol;Acc:HGNC:31868]	103.691	1.11879	0.254312	4.3993	1.086e-05	0.000556857
ENSG00000198974	MIR30E	microRNA 30e [Source:HGNC Symbol;Acc:HGNC:31629]	12406.5	0.066494	0.165765	0.401134	0.688321	0.916518
ENSG00000198975	MIRLET7A2	microRNA let-7a-2 [Source:HGNC Symbol;Acc:HGNC:31477]	231.58	-0.782016	0.231913	-3.37203	0.000746163	0.0126085
ENSG00000198976	MIR429	microRNA 429 [Source:HGNC Symbol;Acc:HGNC:13784]	29.3935	-1.35768	0.385134	-3.52521	0.000423146	0.00948761
ENSG00000198984	MIR345	microRNA 345 [Source:HGNC Symbol;Acc:HGNC:31779]	183.494	-0.0698532	0.227473	-0.307083	0.75878	0.941914
ENSG00000198987	MIR16-2	microRNA 16-2 [Source:HGNC Symbol;Acc:HGNC:31546]	1871.58	0.303804	0.181716	1.67186	0.094551	0.361433
ENSG00000198995	MIR340	microRNA 340 [Source:HGNC Symbol;Acc:HGNC:31777]	1018.47	-0.110408	0.220324	-0.501119	0.616288	0.898889
ENSG00000198997	MIR107	microRNA 107 [Source:HGNC Symbol;Acc:HGNC:31496]	436.081	-0.0395169	0.213256	-0.185303	0.852992	0.959481
ENSG00000199023	MIR339	microRNA 339 [Source:HGNC Symbol;Acc:HGNC:31776]	457.448	0.161698	0.194359	0.831953	0.405435	0.765171
ENSG00000199024	MIR103A2	microRNA 103a-2 [Source:HGNC Symbol;Acc:HGNC:31491]	19983.9	-0.0282517	0.56429	-0.050066	0.96007	0.994141
ENSG00000199030	MIRLET7C	microRNA let-7c [Source:HGNC Symbol;Acc:HGNC:31480]	254.938	-0.694812	0.226385	-3.06915	0.00214665	0.0258316
ENSG00000199032	MIR425	microRNA 425 [Source:HGNC Symbol;Acc:HGNC:31882]	1464.66	0.433067	0.182886	2.36796	0.0178865	0.122568
ENSG00000199035	MIR103A1	microRNA 103a-1 [Source:HGNC Symbol;Acc:HGNC:31490]	6742.1	-0.0140277	0.564556	-0.0248474	0.980177	0.994141
ENSG00000199036	MIR219A1	microRNA 219a-1 [Source:HGNC Symbol;Acc:HGNC:31597]	21.0178	0.53343	0.449328	1.18717	0.235159	0.58051
ENSG00000199038	MIR210	microRNA 210 [Source:HGNC Symbol;Acc:HGNC:31587]	519.371	0.0874968	0.19632	0.445685	0.655825	0.909553
ENSG00000199043	MIR335	microRNA 335 [Source:HGNC Symbol;Acc:HGNC:31773]	356.415	-0.30888	0.207485	-1.48869	0.136569	0.433897
ENSG00000199047	MIR378A	microRNA 378a [Source:HGNC Symbol;Acc:HGNC:31871]	8809.31	0.364329	0.229369	1.5884	0.112197	0.39913
ENSG00000199053	MIR324	microRNA 324 [Source:HGNC Symbol;Acc:HGNC:31767]	33.9242	0.260064	0.345839	0.75198	0.452063	0.788499
ENSG00000199065	MIR101-2	microRNA 101-2 [Source:HGNC Symbol;Acc:HGNC:31489]	9330.93	-0.0585833	0.246449	-0.23771	0.812106	0.945824
ENSG00000199072	MIRLET7F1	microRNA let-7f-1 [Source:HGNC Symbol;Acc:HGNC:31483]	2729.04	0.00967681	0.231636	0.0417759	0.966677	0.994141
ENSG00000199075	MIR26A1	microRNA 26a-1 [Source:HGNC Symbol;Acc:HGNC:31610]	21430.4	-0.0444956	0.171865	-0.258899	0.795713	0.945824
ENSG00000199082	MIR342	microRNA 342 [Source:HGNC Symbol;Acc:HGNC:31778]	82.8325	-0.0178211	0.273319	-0.0652027	0.948013	0.989954
ENSG00000199085	MIR148A	microRNA 148a [Source:HGNC Symbol;Acc:HGNC:31535]	514990	0.181375	0.196429	0.923361	0.355819	0.722818
ENSG00000199090	MIR326	microRNA 326 [Source:HGNC Symbol;Acc:HGNC:31769]	31.8197	0.0349126	0.358468	0.0973938	0.922414	0.97833
ENSG00000199094	MIR30C2	microRNA 30c-2 [Source:HGNC Symbol;Acc:HGNC:31627]	1365.54	-0.103656	0.172723	-0.600128	0.548421	0.86975
ENSG00000199121	MIR26B	microRNA 26b [Source:HGNC Symbol;Acc:HGNC:31612]	3507.59	0.276756	0.209125	1.3234	0.185702	0.506676
ENSG00000199122	MIR148B	microRNA 148b [Source:HGNC Symbol;Acc:HGNC:31761]	28747.8	0.107323	0.184313	0.582289	0.560372	0.876208
ENSG00000199130	MIR365A	microRNA 365a [Source:HGNC Symbol;Acc:HGNC:33692]	189.577	-0.582499	0.23646	-2.46341	0.0137622	0.102836
ENSG00000199132	MIR450A1	microRNA 450a-1 [Source:HGNC Symbol;Acc:HGNC:28008]	102.237	-0.234021	0.244809	-0.955934	0.339106	0.70426
ENSG00000199133	MIRLET7D	microRNA let-7d [Source:HGNC Symbol;Acc:HGNC:31481]	13.9471	-0.270137	0.524301	-0.515233	0.60639	0.897074
ENSG00000199135	MIR101-1	microRNA 101-1 [Source:HGNC Symbol;Acc:HGNC:31488]	3190.9	-0.0549024	0.236515	-0.232131	0.816436	0.946252
ENSG00000199150	MIRLET7G	microRNA let-7g [Source:HGNC Symbol;Acc:HGNC:31485]	424.981	-0.294643	0.206529	-1.42664	0.153683	0.457969
ENSG00000199153	MIR30D	microRNA 30d [Source:HGNC Symbol;Acc:HGNC:31628]	38601.2	-0.212268	0.232094	-0.914577	0.360414	0.724546
ENSG00000199158	MIR96	microRNA 96 [Source:HGNC Symbol;Acc:HGNC:31648]	549.027	0.117308	0.184209	0.636818	0.524243	0.857722
ENSG00000199161	MIR126	microRNA 126 [Source:HGNC Symbol;Acc:HGNC:31508]	1603.82	0.0567803	0.195099	0.291033	0.771026	0.94271
ENSG00000199165	MIRLET7A1	microRNA let-7a-1 [Source:HGNC Symbol;Acc:HGNC:31476]	561.887	-0.881472	0.206214	-4.27455	1.91523e-05	0.000918691
ENSG00000199168	MIR374A	microRNA 374a [Source:HGNC Symbol;Acc:HGNC:31788]	4433.46	0.217273	0.196882	1.10357	0.26978	0.628391
ENSG00000199172	MIR331	microRNA 331 [Source:HGNC Symbol;Acc:HGNC:31772]	410.374	-0.239058	0.190792	-1.25298	0.210212	0.546478
ENSG00000199179	MIRLET7I	microRNA let-7i [Source:HGNC Symbol;Acc:HGNC:31486]	141.075	-0.0682221	0.225387	-0.302689	0.762127	0.94271
ENSG00000199200			125.205	-0.560519	0.273781	-2.04732	0.0406262	0.216327
ENSG00000199223			37.8976	-0.655945	0.38127	-1.72042	0.0853557	0.342113
ENSG00000199270	RNA5S12	RNA, 5S ribosomal 12 [Source:HGNC Symbol;Acc:HGNC:34373]	3106.47	-0.102587	0.209209	-0.490358	0.623881	0.902442
ENSG00000199285			165.691	-0.836848	0.231337	-3.61744	0.000297535	0.00819324
ENSG00000199293	SNORA21	small nucleolar RNA, H/ACA box 21 [Source:HGNC Symbol;Acc:HGNC:32611]	78.5404	-0.431101	0.269398	-1.60024	0.109545	0.39416
ENSG00000199334	RNA5S11	RNA, 5S ribosomal 11 [Source:HGNC Symbol;Acc:HGNC:34372]	3073.74	-0.122084	0.218472	-0.558807	0.576293	0.884124
ENSG00000199337	RNA5S3	RNA, 5S ribosomal 3 [Source:HGNC Symbol;Acc:HGNC:34364]	3084.01	-0.104256	0.224344	-0.464715	0.642136	0.903364
ENSG00000199347	RNU5E-1	RNA, U5E small nuclear 1 [Source:HGNC Symbol;Acc:HGNC:10215]	953.182	0.0966328	0.268497	0.359903	0.718919	0.926938
ENSG00000199352	RNA5S1	RNA, 5S ribosomal 1 [Source:HGNC Symbol;Acc:HGNC:34362]	3110.37	-0.0899798	0.213673	-0.42111	0.673675	0.915049
ENSG00000199354	RNA5SP273	RNA, 5S ribosomal pseudogene 273 [Source:HGNC Symbol;Acc:HGNC:43173]	111.986	0.715363	0.667426	1.07182	0.2838	0.65125
ENSG00000199357			214.074	-0.65929	0.256796	-2.56737	0.0102473	0.0832665
ENSG00000199396	RNA5S5	RNA, 5S ribosomal 5 [Source:HGNC Symbol;Acc:HGNC:34366]	3055	-0.0654363	0.215424	-0.303755	0.761314	0.94271
ENSG00000199410			48.6374	-0.253724	0.383879	-0.66095	0.508644	0.845089
ENSG00000199415	RNA5SP370	RNA, 5S ribosomal pseudogene 370 [Source:HGNC Symbol;Acc:HGNC:43270]	2065.71	-0.189629	0.185252	-1.02362	0.306013	0.673017
ENSG00000199424			48.2847	-1.29637	0.33047	-3.92281	8.75216e-05	0.00282923
ENSG00000199455	RNA5SP191	RNA, 5S ribosomal pseudogene 191 [Source:HGNC Symbol;Acc:HGNC:43091]	12.0301	-0.521556	0.532824	-0.978853	0.327652	0.691091
ENSG00000199477	SNORA31	small nucleolar RNA, H/ACA box 31 [Source:HGNC Symbol;Acc:HGNC:32621]	352.833	0.00510089	0.225543	0.022616	0.981957	0.994141
ENSG00000199480	RNA5SP389	RNA, 5S ribosomal pseudogene 389 [Source:HGNC Symbol;Acc:HGNC:43289]	2084.76	-0.18224	0.18575	-0.981104	0.326541	0.689726
ENSG00000199515			26.5897	-0.711125	0.431276	-1.64889	0.0991711	0.371454
ENSG00000199523	RNA5SP226	RNA, 5S ribosomal pseudogene 226 [Source:HGNC Symbol;Acc:HGNC:43126]	589.373	-0.131601	0.214135	-0.614571	0.538838	0.865907
ENSG00000199535	RNA5SP305	RNA, 5S ribosomal pseudogene 305 [Source:HGNC Symbol;Acc:HGNC:43205]	16.3953	-0.026649	0.505259	-0.0527433	0.957936	0.994141
ENSG00000199564	RNA5SP502	RNA, 5S ribosomal pseudogene 502 [Source:HGNC Symbol;Acc:HGNC:43402]	12.3425	-0.53144	0.536944	-0.98975	0.322296	0.689726
ENSG00000199568	RNU5A-1	RNA, U5A small nuclear 1 [Source:HGNC Symbol;Acc:HGNC:10211]	2297.78	-0.297105	0.255349	-1.16352	0.244617	0.591455
ENSG00000199574	SNORD18C	small nucleolar RNA, C/D box 18C [Source:HGNC Symbol;Acc:HGNC:32716]	1825.96	0.139816	0.17018	0.821572	0.41132	0.76935
ENSG00000199580			31.4034	-0.103408	0.373317	-0.276998	0.781782	0.945684
ENSG00000199585	RNA5SP119	RNA, 5S ribosomal pseudogene 119 [Source:HGNC Symbol;Acc:HGNC:42917]	36.6824	-0.17281	0.445497	-0.387903	0.698088	0.918634
ENSG00000199605	RNY4P24	RNY4 pseudogene 24 [Source:HGNC Symbol;Acc:HGNC:42474]	19.8523	-0.362327	0.454386	-0.797399	0.42522	0.77101
ENSG00000199609	RNA5SP124	RNA, 5S ribosomal pseudogene 124 [Source:HGNC Symbol;Acc:HGNC:43024]	233.464	0.0721195	0.294578	0.244823	0.806594	0.945824
ENSG00000199620	RNA5SP258	RNA, 5S ribosomal pseudogene 258 [Source:HGNC Symbol;Acc:HGNC:43158]	20.2216	-0.0234041	0.509256	-0.0459573	0.963344	0.994141
ENSG00000199631	SNORD33	small nucleolar RNA, C/D box 33 [Source:HGNC Symbol;Acc:HGNC:10160]	2245.87	0.690276	0.17062	4.04568	5.21707e-05	0.00189214
ENSG00000199673	SNORD16	small nucleolar RNA, C/D box 16 [Source:HGNC Symbol;Acc:HGNC:32712]	1018.32	0.246739	0.17692	1.39464	0.163126	0.469604
ENSG00000199709	RNU4-23P	RNA, U4 small nuclear 23, pseudogene [Source:HGNC Symbol;Acc:HGNC:46959]	16.5298	0.124957	0.454541	0.274907	0.783387	0.94577
ENSG00000199744	SNORD36A	small nucleolar RNA, C/D box 36A [Source:HGNC Symbol;Acc:HGNC:10163]	730.901	-0.138316	0.212666	-0.650393	0.515438	0.850674
ENSG00000199753	SNORD104	small nucleolar RNA, C/D box 104 [Source:HGNC Symbol;Acc:HGNC:32768]	38189.6	0.356989	0.167636	2.12955	0.0332091	0.189203
ENSG00000199756			19.6395	-0.735321	0.436343	-1.68519	0.0919518	0.35566
ENSG00000199771	RNA5SP426	RNA, 5S ribosomal pseudogene 426 [Source:HGNC Symbol;Acc:HGNC:43326]	349.597	-0.0196348	0.240161	-0.0817567	0.93484	0.983103
ENSG00000199839	RNA5SP150	RNA, 5S ribosomal pseudogene 150 [Source:HGNC Symbol;Acc:HGNC:43050]	416.423	0.0546183	0.221374	0.246724	0.805122	0.945824
ENSG00000199843	RNA5SP358	RNA, 5S ribosomal pseudogene 358 [Source:HGNC Symbol;Acc:HGNC:43258]	1774.43	-0.0644352	0.251007	-0.256706	0.797405	0.945824
ENSG00000199874	RNA5SP452	RNA, 5S ribosomal pseudogene 452 [Source:HGNC Symbol;Acc:HGNC:43352]	54.0986	-0.156594	0.314692	-0.49761	0.618759	0.899408
ENSG00000199900	RNA5SP463	RNA, 5S ribosomal pseudogene 463 [Source:HGNC Symbol;Acc:HGNC:43363]	424.391	0.467228	0.314066	1.48767	0.136837	0.433897
ENSG00000199910	RNA5S10	RNA, 5S ribosomal 10 [Source:HGNC Symbol;Acc:HGNC:34371]	3118.55	-0.0698608	0.214397	-0.325847	0.74454	0.936837
ENSG00000199932	RNU1-18P	RNA, U1 small nuclear 18, pseudogene [Source:HGNC Symbol;Acc:HGNC:41944]	11.3963	-0.80732	0.559249	-1.44358	0.148858	0.456395
ENSG00000199934			20.844	-0.0654369	0.420265	-0.155704	0.876266	0.963763
ENSG00000199938			18.3992	-1.64638	0.532919	-3.08936	0.00200586	0.0246505
ENSG00000199961	SNORD1B	small nucleolar RNA, C/D box 1B [Source:HGNC Symbol;Acc:HGNC:32676]	6945.68	0.153939	0.199264	0.772539	0.439795	0.781428
ENSG00000199990	VTRNA1-1	vault RNA 1-1 [Source:HGNC Symbol;Acc:HGNC:12654]	87.9896	0.371098	0.258628	1.43487	0.151324	0.457969
ENSG00000199994	RNA5SP145	RNA, 5S ribosomal pseudogene 145 [Source:HGNC Symbol;Acc:HGNC:43045]	1813.77	-0.214104	0.179563	-1.19236	0.23312	0.578714
ENSG00000200026			41.2481	-0.204667	0.430711	-0.475184	0.634656	0.903114
ENSG00000200036	RNA5SP65	RNA, 5S ribosomal pseudogene 65 [Source:HGNC Symbol;Acc:HGNC:42842]	41.8561	0.0986602	0.330415	0.298594	0.765249	0.94271
ENSG00000200058	RNA5SP218	RNA, 5S ribosomal pseudogene 218 [Source:HGNC Symbol;Acc:HGNC:43118]	34.9778	-0.103606	0.39211	-0.264228	0.791604	0.945824
ENSG00000200064	RNY4P9	RNY4 pseudogene 9 [Source:HGNC Symbol;Acc:HGNC:34058]	83.0646	-0.940366	0.277188	-3.39253	0.000692513	0.0126085
ENSG00000200072			37.0153	0.162304	0.345061	0.470364	0.638095	0.903114
ENSG00000200084	SNORD68	small nucleolar RNA, C/D box 68 [Source:HGNC Symbol;Acc:HGNC:32729]	48045.6	0.279721	0.169473	1.65054	0.0988326	0.371184
ENSG00000200087	SNORA73B	small nucleolar RNA, H/ACA box 73B [Source:HGNC Symbol;Acc:HGNC:10116]	508.438	0.6289	0.182951	3.43753	0.000587046	0.0115534
ENSG00000200090			71.1678	-0.563299	0.289518	-1.94564	0.0516975	0.249591
ENSG00000200121			94.3912	-0.811505	0.25936	-3.12887	0.00175478	0.0230831
ENSG00000200156	RNU5B-1	RNA, U5B small nuclear 1 [Source:HGNC Symbol;Acc:HGNC:10212]	2616.86	-0.142373	0.233923	-0.608634	0.542767	0.86724
ENSG00000200169	RNU5D-1	RNA, U5D small nuclear 1 [Source:HGNC Symbol;Acc:HGNC:10214]	55.3021	0.283027	0.323272	0.875508	0.381297	0.743741
ENSG00000200171			99.9755	-0.762361	0.292289	-2.60825	0.00910077	0.0760272
ENSG00000200201			18.3312	-0.867931	0.456225	-1.90242	0.0571166	0.265251
ENSG00000200211	RNY4P27	RNY4 pseudogene 27 [Source:HGNC Symbol;Acc:HGNC:42495]	196.372	-0.711449	0.224654	-3.16687	0.00154091	0.0208303
ENSG00000200225	RNA5SP382	RNA, 5S ribosomal pseudogene 382 [Source:HGNC Symbol;Acc:HGNC:43282]	25.4969	-0.0928557	0.38817	-0.239214	0.81094	0.945824
ENSG00000200246	RNA5SP263	RNA, 5S ribosomal pseudogene 263 [Source:HGNC Symbol;Acc:HGNC:43163]	11.998	-0.438636	0.526849	-0.832564	0.405091	0.765171
ENSG00000200248	RNA5SP214	RNA, 5S ribosomal pseudogene 214 [Source:HGNC Symbol;Acc:HGNC:43114]	102.026	-0.158313	0.266909	-0.593134	0.553091	0.869763
ENSG00000200259	SNORD35A	small nucleolar RNA, C/D box 35A [Source:HGNC Symbol;Acc:HGNC:10162]	256.369	0.59125	0.208575	2.83471	0.00458676	0.0476959
ENSG00000200275	RNA5SP199	RNA, 5S ribosomal pseudogene 199 [Source:HGNC Symbol;Acc:HGNC:43099]	143.663	-0.52622	0.251978	-2.08835	0.0367659	0.200781
ENSG00000200278	RNA5SP352	RNA, 5S ribosomal pseudogene 352 [Source:HGNC Symbol;Acc:HGNC:43252]	23.577	-0.119432	0.448204	-0.266468	0.789879	0.945824
ENSG00000200291			107.514	-0.395702	0.281973	-1.40333	0.160518	0.466581
ENSG00000200309			76.9158	-0.559353	0.281993	-1.98357	0.0473038	0.236043
ENSG00000200314			14.5123	0.054056	0.481304	0.112312	0.910576	0.977505
ENSG00000200320	SNORA63	small nucleolar RNA, H/ACA box 63 [Source:HGNC Symbol;Acc:HGNC:10106]	213.865	-0.059698	0.2046	-0.29178	0.770455	0.94271
ENSG00000200343	RNA5S8	RNA, 5S ribosomal 8 [Source:HGNC Symbol;Acc:HGNC:34369]	3084.46	-0.114715	0.212458	-0.539943	0.589236	0.891115
ENSG00000200354	SNORA71D	small nucleolar RNA, H/ACA box 71D [Source:HGNC Symbol;Acc:HGNC:32657]	249.715	0.0736906	0.220014	0.334935	0.737674	0.936837
ENSG00000200370	RNA5S17	RNA, 5S ribosomal 17 [Source:HGNC Symbol;Acc:HGNC:34378]	3105.52	-0.0789651	0.209851	-0.37629	0.706701	0.922559
ENSG00000200381	RNA5S4	RNA, 5S ribosomal 4 [Source:HGNC Symbol;Acc:HGNC:34365]	3117.34	-0.0585391	0.216427	-0.270479	0.786792	0.945824
ENSG00000200408	RNA5SP74	RNA, 5S ribosomal pseudogene 74 [Source:HGNC Symbol;Acc:HGNC:42851]	106.614	0.219256	0.264654	0.828464	0.407408	0.765171
ENSG00000200418	SNORA63B	small nucleolar RNA, H/ACA box 63B [Source:HGNC Symbol;Acc:HGNC:52209]	33.7603	-0.326964	0.372529	-0.877688	0.380113	0.742744
ENSG00000200422			388.984	0.536345	0.326348	1.64347	0.100285	0.37224
ENSG00000200428			10.442	-1.07311	0.604421	-1.77543	0.0758264	0.317634
ENSG00000200434	RNA5-8SP2	RNA, 5.8S ribosomal pseudogene 2 [Source:HGNC Symbol;Acc:HGNC:41956]	636.59	-0.172131	0.222838	-0.772448	0.439849	0.781428
ENSG00000200436			12.1072	0.177413	0.645956	0.274652	0.783584	0.94577
ENSG00000200463	SNORD118	small nucleolar RNA, C/D box 118 [Source:HGNC Symbol;Acc:HGNC:32952]	811.892	-0.00905068	0.194335	-0.0465726	0.962854	0.994141
ENSG00000200487	RNA5SP322	RNA, 5S ribosomal pseudogene 322 [Source:HGNC Symbol;Acc:HGNC:43222]	21.6221	-0.103377	0.4166	-0.248145	0.804022	0.945824
ENSG00000200494			51.8416	-0.735047	0.330387	-2.2248	0.0260944	0.161254
ENSG00000200506			37.2439	-0.89122	0.357254	-2.49464	0.0126085	0.0966433
ENSG00000200521			14.2136	0.0260194	0.504172	0.0516083	0.958841	0.994141
ENSG00000200530	SNORD35B	small nucleolar RNA, C/D box 35B [Source:HGNC Symbol;Acc:HGNC:17365]	106.747	0.638254	0.255035	2.50262	0.0123279	0.0954521
ENSG00000200534	SNORA33	small nucleolar RNA, H/ACA box 33 [Source:HGNC Symbol;Acc:HGNC:32623]	33.2372	-0.533456	0.366038	-1.45738	0.145012	0.453009
ENSG00000200537	RNY4P6	RNY4 pseudogene 6 [Source:HGNC Symbol;Acc:HGNC:34055]	224.888	-0.692007	0.256417	-2.69876	0.00695993	0.0635066
ENSG00000200558	RNA5SP429	RNA, 5S ribosomal pseudogene 429 [Source:HGNC Symbol;Acc:HGNC:43329]	421.293	-0.20338	0.253429	-0.802513	0.422256	0.770438
ENSG00000200615			142.375	-0.673692	0.260521	-2.58594	0.00971126	0.0793442
ENSG00000200623	SNORD18A	small nucleolar RNA, C/D box 18A [Source:HGNC Symbol;Acc:HGNC:32714]	188961	0.311615	0.175517	1.77541	0.0758306	0.317634
ENSG00000200624	RNA5S6	RNA, 5S ribosomal 6 [Source:HGNC Symbol;Acc:HGNC:34367]	3122.39	-0.0730914	0.224956	-0.324914	0.745246	0.936837
ENSG00000200626	RNA5SP325	RNA, 5S ribosomal pseudogene 325 [Source:HGNC Symbol;Acc:HGNC:43225]	38.4804	-0.510537	0.371693	-1.37354	0.169583	0.479194
ENSG00000200687	RNA5SP335	RNA, 5S ribosomal pseudogene 335 [Source:HGNC Symbol;Acc:HGNC:43235]	22.4596	-0.251862	0.410211	-0.613983	0.539227	0.865907
ENSG00000200706			381.799	0.432155	0.342545	1.2616	0.207093	0.542849
ENSG00000200738	RNA5SP472	RNA, 5S ribosomal pseudogene 472 [Source:HGNC Symbol;Acc:HGNC:43372]	57.9862	0.0571133	0.302038	0.189093	0.85002	0.958264
ENSG00000200741	RNA5SP161	RNA, 5S ribosomal pseudogene 161 [Source:HGNC Symbol;Acc:HGNC:43061]	422.939	-0.327994	0.213864	-1.53366	0.125113	0.413295
ENSG00000200769			34.8808	-0.761379	0.363382	-2.09526	0.0361482	0.199083
ENSG00000200785	SNORD8	small nucleolar RNA, C/D box 8 [Source:HGNC Symbol;Acc:HGNC:20159]	68.8798	0.091978	0.272538	0.337487	0.73575	0.936837
ENSG00000200795	RNU4-1	RNA, U4 small nuclear 1 [Source:HGNC Symbol;Acc:HGNC:10192]	224.345	0.255859	0.212646	1.20322	0.228892	0.573112
ENSG00000200816	SNORA38	small nucleolar RNA, H/ACA box 38 [Source:HGNC Symbol;Acc:HGNC:32631]	34.8631	-0.135335	0.344992	-0.392285	0.694848	0.918434
ENSG00000200829			14.644	-0.663566	0.494969	-1.34062	0.180043	0.496704
ENSG00000200831	SNORD36B	small nucleolar RNA, C/D box 36B [Source:HGNC Symbol;Acc:HGNC:10164]	1726.69	-0.00010134	0.172659	-0.00058694	0.999532	0.999532
ENSG00000200834			26.8384	-0.254973	0.383579	-0.664721	0.506229	0.84396
ENSG00000200855			22.3904	-0.921841	0.434888	-2.11972	0.0340295	0.191674
ENSG00000200879	SNORD14E	small nucleolar RNA, C/D box 14E [Source:HGNC Symbol;Acc:HGNC:30354]	188.373	0.424952	0.216916	1.95906	0.0501062	0.244467
ENSG00000200888			20.6942	-0.962622	0.461182	-2.08729	0.0368617	0.200781
ENSG00000200890	RNA5SP99	RNA, 5S ribosomal pseudogene 99 [Source:HGNC Symbol;Acc:HGNC:42897]	27.2225	-0.219388	0.388484	-0.564729	0.572258	0.884124
ENSG00000200903	RNU1-42P	RNA, U1 small nuclear 42, pseudogene [Source:HGNC Symbol;Acc:HGNC:48384]	20.3107	0.349932	0.442076	0.791566	0.428614	0.77101
ENSG00000200913	SNORD46	small nucleolar RNA, C/D box 46 [Source:HGNC Symbol;Acc:HGNC:10186]	7909.46	0.414829	0.172214	2.40879	0.0160054	0.115534
ENSG00000200959	SNORA74A	small nucleolar RNA, H/ACA box 74A [Source:HGNC Symbol;Acc:HGNC:10119]	69.4748	0.180418	0.278471	0.647886	0.517059	0.850968
ENSG00000200972	RNU5A-8P	RNA, U5A small nuclear 8, pseudogene [Source:HGNC Symbol;Acc:HGNC:42530]	36.7758	-0.360091	0.364969	-0.986633	0.323822	0.689726
ENSG00000200983	SNORA3A	small nucleolar RNA, H/ACA box 3A [Source:HGNC Symbol;Acc:HGNC:32586]	124.323	-0.0634197	0.331098	-0.191544	0.8481	0.958264
ENSG00000201009			100.391	0.257221	0.242151	1.06223	0.288129	0.654915
ENSG00000201035	RNA5SP469	RNA, 5S ribosomal pseudogene 469 [Source:HGNC Symbol;Acc:HGNC:43369]	629.611	-0.112113	0.258403	-0.433871	0.664382	0.91138
ENSG00000201041	RNA5SP242	RNA, 5S ribosomal pseudogene 242 [Source:HGNC Symbol;Acc:HGNC:43142]	224.776	0.0967172	0.259284	0.373017	0.709136	0.922559
ENSG00000201059	RNA5SP336	RNA, 5S ribosomal pseudogene 336 [Source:HGNC Symbol;Acc:HGNC:43236]	838.895	1.29386	0.819619	1.57862	0.114424	0.402363
ENSG00000201071			26.6268	-0.65036	0.416889	-1.56003	0.118753	0.40463
ENSG00000201098	RNY1	RNA, Ro60-associated Y1 [Source:HGNC Symbol;Acc:HGNC:10242]	3834.98	-0.793928	0.171653	-4.6252	3.74245e-06	0.000214039
ENSG00000201129	SNORA58B	small nucleolar RNA, H/ACA box 58B [Source:HGNC Symbol;Acc:HGNC:52208]	63.9448	-0.0114544	0.277326	-0.0413029	0.967054	0.994141
ENSG00000201145	RNA5SP175	RNA, 5S ribosomal pseudogene 175 [Source:HGNC Symbol;Acc:HGNC:43075]	22.0706	0.200713	0.427175	0.469861	0.638455	0.903114
ENSG00000201168	RNA5SP368	RNA, 5S ribosomal pseudogene 368 [Source:HGNC Symbol;Acc:HGNC:43268]	19.2409	-0.611672	0.446984	-1.36844	0.171173	0.480254
ENSG00000201178			38.0044	-1.14888	0.367707	-3.12443	0.00178148	0.0230831
ENSG00000201185	RNA5SP202	RNA, 5S ribosomal pseudogene 202 [Source:HGNC Symbol;Acc:HGNC:43102]	29517.7	-0.0190902	0.228951	-0.0833812	0.933548	0.982439
ENSG00000201279			97.0871	-0.526375	0.249356	-2.11094	0.0347772	0.194413
ENSG00000201302	SNORA65	small nucleolar RNA, H/ACA box 65 [Source:HGNC Symbol;Acc:HGNC:10222]	55.0677	0.0342226	0.326429	0.104839	0.916503	0.977505
ENSG00000201321	RNA5S9	RNA, 5S ribosomal 9 [Source:HGNC Symbol;Acc:HGNC:34370]	2160.43	-0.0336871	0.233076	-0.144532	0.88508	0.967156
ENSG00000201339			202.158	-0.754655	0.283186	-2.66488	0.0077016	0.0673664
ENSG00000201343			10.3843	-0.888797	0.603893	-1.47178	0.141081	0.442589
ENSG00000201355	RNA5S14	RNA, 5S ribosomal 14 [Source:HGNC Symbol;Acc:HGNC:34375]	3061.73	-0.0675423	0.217021	-0.311225	0.75563	0.940269
ENSG00000201356	RNA5SP500	RNA, 5S ribosomal pseudogene 500 [Source:HGNC Symbol;Acc:HGNC:43400]	664.776	-0.0816519	0.253107	-0.322599	0.746999	0.936837
ENSG00000201377	RNY4P23	RNY4 pseudogene 23 [Source:HGNC Symbol;Acc:HGNC:42473]	24.0997	-0.841766	0.402239	-2.0927	0.0363761	0.199599
ENSG00000201403	SNORD14B	small nucleolar RNA, C/D box 14B [Source:HGNC Symbol;Acc:HGNC:31803]	103.372	0.00735505	0.266595	0.0275889	0.97799	0.994141
ENSG00000201405			216.594	-0.733475	0.212059	-3.45883	0.000542532	0.0111284
ENSG00000201413	RNA5SP141	RNA, 5S ribosomal pseudogene 141 [Source:HGNC Symbol;Acc:HGNC:43041]	315.837	-0.115725	0.19327	-0.598775	0.549323	0.86975
ENSG00000201415	RNA5SP204	RNA, 5S ribosomal pseudogene 204 [Source:HGNC Symbol;Acc:HGNC:43104]	91.5171	0.0141569	0.295915	0.0478413	0.961843	0.994141
ENSG00000201448	SNORA63C	small nucleolar RNA, H/ACA box 63C [Source:HGNC Symbol;Acc:HGNC:52210]	22.3268	0.258956	0.411823	0.628804	0.529477	0.863496
ENSG00000201470	RNY4P7	RNY4 pseudogene 7 [Source:HGNC Symbol;Acc:HGNC:34056]	3914.27	-0.454593	0.195346	-2.32711	0.0199592	0.131325
ENSG00000201483			11.7225	-0.40529	0.537778	-0.753638	0.451067	0.788499
ENSG00000201487	SNORD45B	small nucleolar RNA, C/D box 45B [Source:HGNC Symbol;Acc:HGNC:10185]	1121.45	0.404915	0.225662	1.79434	0.0727582	0.310458
ENSG00000201529			23.238	-1.10648	0.441003	-2.50901	0.0121071	0.0947543
ENSG00000201555			20.9766	-0.254784	0.469449	-0.54273	0.587316	0.891115
ENSG00000201558	RNVU1-6	RNA, variant U1 small nuclear 6 [Source:HGNC Symbol;Acc:HGNC:48314]	13.5659	-0.224526	0.510754	-0.439597	0.660229	0.910397
ENSG00000201588	RNA5S2	RNA, 5S ribosomal 2 [Source:HGNC Symbol;Acc:HGNC:34363]	3080.59	-0.0601493	0.212862	-0.282575	0.777503	0.945104
ENSG00000201592			677.541	0.245128	0.218771	1.12048	0.262509	0.62012
ENSG00000201595	RNA5SP132	RNA, 5S ribosomal pseudogene 132 [Source:HGNC Symbol;Acc:HGNC:43032]	445.478	0.0374722	0.257685	0.145419	0.88438	0.967156
ENSG00000201638	RNY4P16	RNY4 pseudogene 16 [Source:HGNC Symbol;Acc:HGNC:34066]	209.059	-0.82533	0.243535	-3.38896	0.000701591	0.0126085
ENSG00000201643	SNORA14A	small nucleolar RNA, H/ACA box 14A [Source:HGNC Symbol;Acc:HGNC:32602]	11.0342	0.359356	0.569232	0.6313	0.527845	0.862533
ENSG00000201644			70.3184	-0.768198	0.31374	-2.44852	0.0143446	0.106652
ENSG00000201654	RNU6-7	RNA, U6 small nuclear 7 [Source:HGNC Symbol;Acc:HGNC:34284]	19.4143	-0.203205	0.431411	-0.471025	0.637623	0.903114
ENSG00000201659	RNU12-2P	RNA, U12 small nuclear 2, pseudogene [Source:HGNC Symbol;Acc:HGNC:10109]	13.2555	0.218805	0.52937	0.413331	0.679364	0.915049
ENSG00000201675	SNORD32A	small nucleolar RNA, C/D box 32A [Source:HGNC Symbol;Acc:HGNC:10159]	1701.49	0.682301	0.173682	3.92845	8.54944e-05	0.00282512
ENSG00000201708	RNA5SP359	RNA, 5S ribosomal pseudogene 359 [Source:HGNC Symbol;Acc:HGNC:43259]	13.5881	-0.466536	0.508487	-0.917498	0.358882	0.723112
ENSG00000201754	SNORD52	small nucleolar RNA, C/D box 52 [Source:HGNC Symbol;Acc:HGNC:10202]	5891.32	0.0792337	0.17208	0.460446	0.645196	0.9051
ENSG00000201772	SNORA5C	small nucleolar RNA, H/ACA box 5C [Source:HGNC Symbol;Acc:HGNC:32590]	18.4316	0.00431319	0.443128	0.00973351	0.992234	0.998276
ENSG00000201778			10476.9	-0.484884	0.193886	-2.50087	0.0123889	0.0954521
ENSG00000201785	SNORD117	small nucleolar RNA, C/D box 117 [Source:HGNC Symbol;Acc:HGNC:32742]	530.851	-0.130769	0.184201	-0.709926	0.47775	0.817507
ENSG00000201800			65.5007	-0.970073	0.330288	-2.93706	0.00331344	0.036497
ENSG00000201801	RNU5E-4P	RNA, U5E small nuclear 4, pseudogene [Source:HGNC Symbol;Acc:HGNC:42513]	133.861	-0.343358	0.227245	-1.51096	0.130798	0.425595
ENSG00000201818	RNY4P17	RNY4 pseudogene 17 [Source:HGNC Symbol;Acc:HGNC:34067]	304.165	-0.621646	0.200715	-3.09716	0.00195387	0.0244481
ENSG00000201822	RNA5SP149	RNA, 5S ribosomal pseudogene 149 [Source:HGNC Symbol;Acc:HGNC:43049]	338.397	-0.223146	0.204356	-1.09194	0.274858	0.634648
ENSG00000201823	SNORD48	small nucleolar RNA, C/D box 48 [Source:HGNC Symbol;Acc:HGNC:10188]	1928.13	0.279429	0.198305	1.40908	0.15881	0.466581
ENSG00000201847	SNORD31B	small nucleolar RNA, C/D box 31B [Source:HGNC Symbol;Acc:HGNC:52226]	12.8438	0.277112	0.554478	0.499771	0.617236	0.898889
ENSG00000201861	RNA5SP298	RNA, 5S ribosomal pseudogene 298 [Source:HGNC Symbol;Acc:HGNC:43198]	124.067	-0.246554	0.243208	-1.01376	0.310699	0.678254
ENSG00000201882			38.1924	-0.132388	0.330424	-0.40066	0.68867	0.916518
ENSG00000201900	RNY1P13	RNY1 pseudogene 13 [Source:HGNC Symbol;Acc:HGNC:50876]	25.3006	-0.891026	0.415927	-2.14227	0.032172	0.18471
ENSG00000201920	RNA5SP442	RNA, 5S ribosomal pseudogene 442 [Source:HGNC Symbol;Acc:HGNC:43342]	445.377	-0.238064	0.182436	-1.30492	0.191921	0.517779
ENSG00000201925	RNA5S15	RNA, 5S ribosomal 15 [Source:HGNC Symbol;Acc:HGNC:34376]	3099.83	-0.0765653	0.221516	-0.345642	0.729612	0.936837
ENSG00000201931	RNA5SP172	RNA, 5S ribosomal pseudogene 172 [Source:HGNC Symbol;Acc:HGNC:43072]	28.436	-0.239744	0.374347	-0.640431	0.521892	0.855627
ENSG00000201933			16.4507	-1.08934	0.497504	-2.1896	0.028553	0.172668
ENSG00000201938			107.13	-0.518334	0.241635	-2.14511	0.031944	0.184214
ENSG00000201966	RNA5-8SP4	RNA, 5.8S ribosomal pseudogene 4 [Source:HGNC Symbol;Acc:HGNC:41958]	58.0311	-0.000409941	0.302416	-0.00135555	0.998918	0.999532
ENSG00000201998	SNORA23	small nucleolar RNA, H/ACA box 23 [Source:HGNC Symbol;Acc:HGNC:32613]	96.6035	0.100628	0.263999	0.381169	0.703078	0.922559
ENSG00000202008			21.6254	-0.910249	0.431767	-2.10819	0.0350142	0.195004
ENSG00000202023			17.0224	0.425674	0.474176	0.897712	0.369339	0.730329
ENSG00000202031	SNORD38A	small nucleolar RNA, C/D box 38A [Source:HGNC Symbol;Acc:HGNC:30355]	10227.2	0.467756	0.228595	2.04623	0.0407341	0.216327
ENSG00000202054	RNA5SP152	RNA, 5S ribosomal pseudogene 152 [Source:HGNC Symbol;Acc:HGNC:43052]	24.1882	-0.378914	0.395264	-0.958634	0.337743	0.703395
ENSG00000202056	RNA5SP19	RNA, 5S ribosomal pseudogene 19 [Source:HGNC Symbol;Acc:HGNC:42587]	100.686	-0.200162	0.287404	-0.696447	0.486149	0.823265
ENSG00000202063	RNA5SP79	RNA, 5S ribosomal pseudogene 79 [Source:HGNC Symbol;Acc:HGNC:42856]	11.5519	0.129725	0.550507	0.235647	0.813707	0.945873
ENSG00000202093	SNORD58C	small nucleolar RNA, C/D box 58C [Source:HGNC Symbol;Acc:HGNC:33613]	10192.7	0.207726	0.16792	1.23705	0.216068	0.550159
ENSG00000202111	VTRNA1-2	vault RNA 1-2 [Source:HGNC Symbol;Acc:HGNC:12655]	375.653	0.0696411	0.208779	0.333564	0.738709	0.936837
ENSG00000202124	RNY4P3	RNY4 pseudogene 3 [Source:HGNC Symbol;Acc:HGNC:10247]	20.6456	-0.990743	0.496864	-1.99399	0.0461527	0.234229
ENSG00000202144			97.1568	-0.218002	0.266938	-0.816679	0.414112	0.770438
ENSG00000202174	RNA5-8SP5	RNA, 5.8S ribosomal pseudogene 5 [Source:HGNC Symbol;Acc:HGNC:41959]	11.4732	0.238377	0.552933	0.431114	0.666385	0.912668
ENSG00000202187	RNA5SP355	RNA, 5S ribosomal pseudogene 355 [Source:HGNC Symbol;Acc:HGNC:43255]	76.0751	-0.0334067	0.270267	-0.123606	0.901627	0.97224
ENSG00000202198			163.976	0.449637	0.291878	1.5405	0.123439	0.413295
ENSG00000202252	SNORD14C	small nucleolar RNA, C/D box 14C [Source:HGNC Symbol;Acc:HGNC:30352]	1938.72	0.17288	0.171525	1.0079	0.313501	0.679556
ENSG00000202257	RNA5S16	RNA, 5S ribosomal 16 [Source:HGNC Symbol;Acc:HGNC:34377]	3096.82	-0.114478	0.21524	-0.531862	0.594822	0.891115
ENSG00000202264	RNA5SP77	RNA, 5S ribosomal pseudogene 77 [Source:HGNC Symbol;Acc:HGNC:42854]	285.435	0.0259699	0.294114	0.0882986	0.929639	0.9818
ENSG00000202273			117.398	-0.985023	0.291387	-3.38046	0.000723641	0.0126085
ENSG00000202306			72.2305	-1.07785	0.286886	-3.75705	0.000171927	0.00511311
ENSG00000202314	SNORD6	small nucleolar RNA, C/D box 6 [Source:HGNC Symbol;Acc:HGNC:32703]	15130.6	0.558304	0.256663	2.17525	0.0296117	0.175429
ENSG00000202324	RNA5SP366	RNA, 5S ribosomal pseudogene 366 [Source:HGNC Symbol;Acc:HGNC:43266]	29.5375	-0.257845	0.394209	-0.654084	0.513058	0.84973
ENSG00000202354	RNY3	RNA, Ro60-associated Y3 [Source:HGNC Symbol;Acc:HGNC:10243]	506.281	-0.357698	0.211332	-1.69258	0.090535	0.35566
ENSG00000202357			21.003	-0.0230017	0.425586	-0.0540472	0.956898	0.994141
ENSG00000202363	SNORA62	small nucleolar RNA, H/ACA box 62 [Source:HGNC Symbol;Acc:HGNC:10107]	172.507	0.243834	0.219505	1.11083	0.26664	0.626372
ENSG00000202400	SNORD82	small nucleolar RNA, C/D box 82 [Source:HGNC Symbol;Acc:HGNC:10240]	8526.19	0.331062	0.17383	1.90451	0.0568435	0.264973
ENSG00000202408	RNVU1-21	RNA, variant U1 small nuclear 21 [Source:HGNC Symbol;Acc:HGNC:48464]	10.8795	-0.876771	0.592666	-1.47937	0.139042	0.438972
ENSG00000202411	RNA5SP259	RNA, 5S ribosomal pseudogene 259 [Source:HGNC Symbol;Acc:HGNC:43159]	19.3978	0.326948	0.477987	0.68401	0.493969	0.832906
ENSG00000202441	RNY4P10	RNY4 pseudogene 10 [Source:HGNC Symbol;Acc:HGNC:34060]	13221.2	-0.591842	0.179346	-3.3	0.000966854	0.0150084
ENSG00000202444	RNU5E-6P	RNA, U5E small nuclear 6, pseudogene [Source:HGNC Symbol;Acc:HGNC:42522]	38.9435	-0.0625204	0.332032	-0.188296	0.850644	0.958264
ENSG00000202472	RNA5SP248	RNA, 5S ribosomal pseudogene 248 [Source:HGNC Symbol;Acc:HGNC:43148]	720.943	-0.153726	0.246967	-0.622454	0.533643	0.865352
ENSG00000202503	SNORD34	small nucleolar RNA, C/D box 34 [Source:HGNC Symbol;Acc:HGNC:10161]	1111.34	0.728022	0.174233	4.17845	2.935e-05	0.00124696
ENSG00000202515	VTRNA1-3	vault RNA 1-3 [Source:HGNC Symbol;Acc:HGNC:12656]	12.0668	1.44736	0.540673	2.67696	0.00742938	0.0657588
ENSG00000202521	RNA5S7	RNA, 5S ribosomal 7 [Source:HGNC Symbol;Acc:HGNC:34368]	3068.97	-0.090089	0.215889	-0.417294	0.676464	0.915049
ENSG00000202526	RNA5S13	RNA, 5S ribosomal 13 [Source:HGNC Symbol;Acc:HGNC:34374]	3106.13	-0.0455696	0.214633	-0.212314	0.831862	0.953723
ENSG00000202529	SNORD18B	small nucleolar RNA, C/D box 18B [Source:HGNC Symbol;Acc:HGNC:32715]	551.092	0.0222558	0.210062	0.105949	0.915623	0.977505
ENSG00000202538	RNU4-2	RNA, U4 small nuclear 2 [Source:HGNC Symbol;Acc:HGNC:10193]	107.709	0.0858459	0.269548	0.318481	0.75012	0.936837
ENSG00000202566	MIR421	microRNA 421 [Source:HGNC Symbol;Acc:HGNC:32793]	736.429	0.358822	0.181395	1.97813	0.047914	0.238288
ENSG00000202569	MIR146B	microRNA 146b [Source:HGNC Symbol;Acc:HGNC:32079]	330.491	0.290756	0.198168	1.46722	0.142316	0.445524
ENSG00000202601	MIR582	microRNA 582 [Source:HGNC Symbol;Acc:HGNC:32838]	2252.53	1.18161	0.182532	6.47342	9.58072e-11	2.03522e-08
ENSG00000203709	MIR29B2CHG	MIR29B2 and MIR29C host gene [Source:HGNC Symbol;Acc:HGNC:32018]	22.9999	0.556934	0.39426	1.41261	0.157771	0.466414
ENSG00000203812	H2AC18	H2A clustered histone 18 [Source:HGNC Symbol;Acc:HGNC:4736]	16.8665	-0.950391	0.490348	-1.9382	0.0525994	0.2498
ENSG00000203852	H3C15	H3 clustered histone 15 [Source:HGNC Symbol;Acc:HGNC:20505]	26.7191	-0.606693	0.386431	-1.56999	0.116417	0.402363
ENSG00000203875	SNHG5	small nucleolar RNA host gene 5 [Source:HGNC Symbol;Acc:HGNC:21026]	74464.1	0.0990047	0.177375	0.558165	0.576732	0.884124
ENSG00000204387	SNHG32	small nucleolar RNA host gene 32 [Source:HGNC Symbol;Acc:HGNC:19078]	7727.81	0.123626	0.166681	0.74169	0.458275	0.797024
ENSG00000204628	RACK1	receptor for activated C kinase 1 [Source:HGNC Symbol;Acc:HGNC:4399]	7468.24	0.179128	0.172065	1.04105	0.297853	0.666464
ENSG00000206557	TRIM71	tripartite motif containing 71 [Source:HGNC Symbol;Acc:HGNC:32669]	30.9607	0.131711	0.356209	0.369759	0.711562	0.923292
ENSG00000206585	RNVU1-7	RNA, variant U1 small nuclear 7 [Source:HGNC Symbol;Acc:HGNC:37500]	452.385	-0.146855	0.185632	-0.791109	0.42888	0.77101
ENSG00000206588	RNU1-28P	RNA, U1 small nuclear 28, pseudogene [Source:HGNC Symbol;Acc:HGNC:37498]	481.353	-0.114832	0.184756	-0.621536	0.534247	0.865387
ENSG00000206596	RNU1-27P	RNA, U1 small nuclear 27, pseudogene [Source:HGNC Symbol;Acc:HGNC:37497]	1691.7	-0.0454725	0.176365	-0.257832	0.796537	0.945824
ENSG00000206597	SNORA57	small nucleolar RNA, H/ACA box 57 [Source:HGNC Symbol;Acc:HGNC:32651]	748.87	1.0327	0.181774	5.68121	1.33744e-08	1.42056e-06
ENSG00000206602	SNORD58A	small nucleolar RNA, C/D box 58A [Source:HGNC Symbol;Acc:HGNC:10208]	26533	0.2961	0.170042	1.74133	0.0816252	0.33163
ENSG00000206611	SNORD24	small nucleolar RNA, C/D box 24 [Source:HGNC Symbol;Acc:HGNC:10146]	1838.02	-0.0332507	0.173966	-0.191133	0.848421	0.958264
ENSG00000206612	SNORA2A	small nucleolar RNA, H/ACA box 2A [Source:HGNC Symbol;Acc:HGNC:32584]	141.207	0.00798831	0.223423	0.0357542	0.971478	0.994141
ENSG00000206620	SNORD45C	small nucleolar RNA, C/D box 45C [Source:HGNC Symbol;Acc:HGNC:32720]	5008.47	0.37236	0.18111	2.05599	0.0397835	0.213502
ENSG00000206630	SNORD60	small nucleolar RNA, C/D box 60 [Source:HGNC Symbol;Acc:HGNC:10217]	13531.7	0.601039	0.170628	3.52251	0.000427485	0.00948761
ENSG00000206651			14.5116	0.433615	0.576951	0.751564	0.452313	0.788499
ENSG00000206652	RNU1-1	RNA, U1 small nuclear 1 [Source:HGNC Symbol;Acc:HGNC:10120]	489.704	-0.0836642	0.183796	-0.4552	0.648965	0.907845
ENSG00000206680	SNORD21	small nucleolar RNA, C/D box 21 [Source:HGNC Symbol;Acc:HGNC:10144]	16479.2	0.0532026	0.17938	0.296591	0.766779	0.94271
ENSG00000206693	SNORA56	small nucleolar RNA, H/ACA box 56 [Source:HGNC Symbol;Acc:HGNC:32650]	11.4569	-0.276012	0.543964	-0.507407	0.611869	0.897074
ENSG00000206702	RNU1-11P	RNA, U1 small nuclear 11, pseudogene [Source:HGNC Symbol;Acc:HGNC:10137]	372.986	0.0226764	0.220017	0.103067	0.91791	0.977505
ENSG00000206737	RNVU1-18	RNA, variant U1 small nuclear 18 [Source:HGNC Symbol;Acc:HGNC:37496]	462.643	-0.127708	0.183582	-0.695646	0.486651	0.823265
ENSG00000206754	SNORD101	small nucleolar RNA, C/D box 101 [Source:HGNC Symbol;Acc:HGNC:32764]	139543	0.00561754	0.171675	0.0327219	0.973896	0.994141
ENSG00000206760	SNORA6	small nucleolar RNA, H/ACA box 6 [Source:HGNC Symbol;Acc:HGNC:32591]	98.3274	0.300879	0.25397	1.1847	0.236135	0.581346
ENSG00000206775	SNORD37	small nucleolar RNA, C/D box 37 [Source:HGNC Symbol;Acc:HGNC:10166]	9985.14	-0.0999656	0.169682	-0.589134	0.555772	0.870846
ENSG00000206799	SNORA32	small nucleolar RNA, H/ACA box 32 [Source:HGNC Symbol;Acc:HGNC:32622]	22.1205	0.233806	0.462066	0.506002	0.612856	0.897074
ENSG00000206811	SNORA10	small nucleolar RNA, H/ACA box 10 [Source:HGNC Symbol;Acc:HGNC:32598]	12.106	0.351676	0.529175	0.664574	0.506323	0.84396
ENSG00000206820	RNU1-138P	RNA, U1 small nuclear 138, pseudogene [Source:HGNC Symbol;Acc:HGNC:48480]	14.6432	-0.0856451	0.483731	-0.177051	0.859468	0.959481
ENSG00000206822			88.15	-0.999452	0.292104	-3.42156	0.000622623	0.0120239
ENSG00000206840			79.0276	-0.982992	0.2722	-3.61129	0.000304683	0.00823752
ENSG00000206850			69.0161	-0.905693	0.312419	-2.89897	0.00374388	0.0397654
ENSG00000206882	RNA5SP87	RNA, 5S ribosomal pseudogene 87 [Source:HGNC Symbol;Acc:HGNC:42885]	35.9081	-0.182279	0.439837	-0.414424	0.678564	0.915049
ENSG00000206885	SNORA75	small nucleolar RNA, H/ACA box 75 [Source:HGNC Symbol;Acc:HGNC:32661]	94.3653	-0.504767	0.350372	-1.44066	0.149681	0.456783
ENSG00000206897	SNORA9B	small nucleolar RNA, H/ACA box 9B [Source:HGNC Symbol;Acc:HGNC:52223]	70.8709	0.0966933	0.311675	0.310237	0.75638	0.940416
ENSG00000206908	RNU1-136P	RNA, U1 small nuclear 136, pseudogene [Source:HGNC Symbol;Acc:HGNC:48478]	29.6418	-0.17207	0.356596	-0.482534	0.629427	0.902562
ENSG00000206925			60.0674	-0.950427	0.304251	-3.12382	0.00178518	0.0230831
ENSG00000206932	RNU6-4P	RNA, U6 small nuclear 4, pseudogene [Source:HGNC Symbol;Acc:HGNC:34253]	11.5576	-0.348635	0.58848	-0.592432	0.553561	0.869763
ENSG00000206941	SNORD15A	small nucleolar RNA, C/D box 15A [Source:HGNC Symbol;Acc:HGNC:10114]	1157.44	0.757602	0.188404	4.02117	5.79106e-05	0.00200263
ENSG00000206952	SNORA50A	small nucleolar RNA, H/ACA box 50A [Source:HGNC Symbol;Acc:HGNC:32643]	163.526	0.0252157	0.222754	0.1132	0.909872	0.977505
ENSG00000206978			24.5221	-1.17197	0.432515	-2.70967	0.00673498	0.0632315
ENSG00000206979	SNORD61	small nucleolar RNA, C/D box 61 [Source:HGNC Symbol;Acc:HGNC:10218]	33831.1	0.342887	0.170582	2.01011	0.0444197	0.230228
ENSG00000206989	SNORD63	small nucleolar RNA, C/D box 63 [Source:HGNC Symbol;Acc:HGNC:10220]	44677	0.499627	0.186214	2.68308	0.00729473	0.065345
ENSG00000207005	RNU1-2	RNA, U1 small nuclear 2 [Source:HGNC Symbol;Acc:HGNC:10123]	1704.65	-0.0608465	0.177013	-0.343741	0.731041	0.936837
ENSG00000207008	SNORA54	small nucleolar RNA, H/ACA box 54 [Source:HGNC Symbol;Acc:HGNC:32647]	17.7483	-0.129058	0.512386	-0.251876	0.801137	0.945824
ENSG00000207031	SNORD59A	small nucleolar RNA, C/D box 59A [Source:HGNC Symbol;Acc:HGNC:10210]	10966.6	0.216141	0.179762	1.20237	0.229219	0.573112
ENSG00000207047	SNORD51	small nucleolar RNA, C/D box 51 [Source:HGNC Symbol;Acc:HGNC:10201]	1782.63	0.565288	0.172504	3.27695	0.00104936	0.0158969
ENSG00000207051	SNORA27	small nucleolar RNA, H/ACA box 27 [Source:HGNC Symbol;Acc:HGNC:32617]	24.6657	0.0528656	0.407038	0.129879	0.896662	0.971112
ENSG00000207067	SNORA72	small nucleolar RNA, H/ACA box 72 [Source:HGNC Symbol;Acc:HGNC:10234]	20.5206	-0.387343	0.434424	-0.891625	0.372594	0.733837
ENSG00000207080			15.0522	-1.47237	0.540844	-2.72236	0.00648172	0.0613905
ENSG00000207088	SNORA7B	small nucleolar RNA, H/ACA box 7B [Source:HGNC Symbol;Acc:HGNC:32593]	267.037	0.257476	0.201739	1.27628	0.201855	0.53409
ENSG00000207110	RNU1-106P	RNA, U1 small nuclear 106, pseudogene [Source:HGNC Symbol;Acc:HGNC:48448]	13.9629	-0.257842	0.521791	-0.494149	0.621201	0.902077
ENSG00000207112	SNORA25	small nucleolar RNA, H/ACA box 25 [Source:HGNC Symbol;Acc:HGNC:32615]	38.647	0.166526	0.343513	0.484773	0.627837	0.902562
ENSG00000207118	SNORD14D	small nucleolar RNA, C/D box 14D [Source:HGNC Symbol;Acc:HGNC:30353]	72.4555	-0.0762381	0.318845	-0.239107	0.811023	0.945824
ENSG00000207142			16.0276	-0.153973	0.460947	-0.334036	0.738352	0.936837
ENSG00000207145	SNORA18	small nucleolar RNA, H/ACA box 18 [Source:HGNC Symbol;Acc:HGNC:32608]	950.803	0.630558	0.185278	3.40332	0.000665734	0.012531
ENSG00000207161			25.6726	-1.09006	0.475163	-2.29408	0.0217862	0.140852
ENSG00000207165	SNORA70	small nucleolar RNA, H/ACA box 70 [Source:HGNC Symbol;Acc:HGNC:10231]	54.3425	0.545254	0.30383	1.7946	0.072717	0.310458
ENSG00000207166	SNORA68	small nucleolar RNA, H/ACA box 68 [Source:HGNC Symbol;Acc:HGNC:10225]	309.556	-0.18479	0.1981	-0.932812	0.350917	0.716777
ENSG00000207175	RNU1-67P	RNA, U1 small nuclear 67, pseudogene [Source:HGNC Symbol;Acc:HGNC:48409]	58.509	-0.420396	0.302316	-1.39059	0.16435	0.469998
ENSG00000207181	SNORA14B	small nucleolar RNA, H/ACA box 14B [Source:HGNC Symbol;Acc:HGNC:32603]	29.8804	0.169896	0.384511	0.44185	0.658598	0.910162
ENSG00000207186	RNA5SP122	RNA, 5S ribosomal pseudogene 122 [Source:HGNC Symbol;Acc:HGNC:42920]	16.7943	0.213526	0.458395	0.465811	0.641351	0.903114
ENSG00000207205	RNVU1-15	RNA, variant U1 small nuclear 15 [Source:HGNC Symbol;Acc:HGNC:48320]	227.321	-0.325558	0.239873	-1.35721	0.174716	0.487434
ENSG00000207207			23.714	-1.38435	0.417647	-3.31465	0.000917591	0.0146716
ENSG00000207241	SNORD45A	small nucleolar RNA, C/D box 45A [Source:HGNC Symbol;Acc:HGNC:10184]	16898.5	0.437778	0.179591	2.43764	0.0147835	0.108827
ENSG00000207271			13.1612	-1.27871	0.538823	-2.37316	0.0176367	0.121416
ENSG00000207280	SNORD20	small nucleolar RNA, C/D box 20 [Source:HGNC Symbol;Acc:HGNC:10143]	2611.71	0.0886723	0.202731	0.43739	0.661829	0.910397
ENSG00000207297	SNORD7	small nucleolar RNA, C/D box 7 [Source:HGNC Symbol;Acc:HGNC:32704]	217.527	-0.40762	0.212408	-1.91904	0.0549787	0.257897
ENSG00000207304	SNORA8	small nucleolar RNA, H/ACA box 8 [Source:HGNC Symbol;Acc:HGNC:32596]	177.114	0.311906	0.238459	1.308	0.190872	0.516858
ENSG00000207313	SNORA2B	small nucleolar RNA, H/ACA box 2B [Source:HGNC Symbol;Acc:HGNC:32585]	16.6137	0.0354696	0.496825	0.0713925	0.943085	0.989954
ENSG00000207322	RNU1-89P	RNA, U1 small nuclear 89, pseudogene [Source:HGNC Symbol;Acc:HGNC:48431]	13.8329	-0.00713449	0.497425	-0.0143429	0.988556	0.996599
ENSG00000207340	RNVU1-1	RNA, variant U1 small nuclear 1 [Source:HGNC Symbol;Acc:HGNC:10133]	141.325	-0.0904802	0.242485	-0.373137	0.709046	0.922559
ENSG00000207349	RNVU1-17	RNA, variant U1 small nuclear 17 [Source:HGNC Symbol;Acc:HGNC:48322]	127.677	-0.530318	0.271001	-1.95689	0.0503607	0.244727
ENSG00000207389	RNU1-4	RNA, U1 small nuclear 4 [Source:HGNC Symbol;Acc:HGNC:10128]	1680.62	-0.126075	0.169811	-0.742441	0.45782	0.797024
ENSG00000207392	SNORA20	small nucleolar RNA, H/ACA box 20 [Source:HGNC Symbol;Acc:HGNC:32610]	173.58	-0.255812	0.253014	-1.01106	0.311988	0.678254
ENSG00000207395			73.0406	-1.02888	0.311512	-3.30286	0.00095705	0.0150084
ENSG00000207405	SNORA64	small nucleolar RNA, H/ACA box 64 [Source:HGNC Symbol;Acc:HGNC:10221]	639.66	0.329762	0.178796	1.84435	0.0651328	0.292989
ENSG00000207406	SNORA41	small nucleolar RNA, H/ACA box 41 [Source:HGNC Symbol;Acc:HGNC:32634]	20.8722	-0.143683	0.426275	-0.337065	0.736068	0.936837
ENSG00000207421	SNORD38B	small nucleolar RNA, C/D box 38B [Source:HGNC Symbol;Acc:HGNC:30356]	641.204	0.249667	0.200396	1.24587	0.212813	0.54865
ENSG00000207445	SNORD15B	small nucleolar RNA, C/D box 15B [Source:HGNC Symbol;Acc:HGNC:16649]	235.146	0.487239	0.227163	2.14489	0.0319618	0.184214
ENSG00000207475	SNORA80E	small nucleolar RNA, H/ACA box 80E [Source:HGNC Symbol;Acc:HGNC:32635]	63.7724	-0.307562	0.278846	-1.10298	0.270035	0.628391
ENSG00000207493	SNORA46	small nucleolar RNA, H/ACA box 46 [Source:HGNC Symbol;Acc:HGNC:32639]	30.6426	0.0381135	0.429606	0.0887174	0.929307	0.9818
ENSG00000207494			35.8148	-1.08839	0.372038	-2.92549	0.00343911	0.0376026
ENSG00000207496	SNORA7A	small nucleolar RNA, H/ACA box 7A [Source:HGNC Symbol;Acc:HGNC:32592]	1170.42	0.278486	0.177413	1.5697	0.116485	0.402363
ENSG00000207497			20.8153	-1.07012	0.449549	-2.38043	0.0172925	0.119908
ENSG00000207500	SNORD102	small nucleolar RNA, C/D box 102 [Source:HGNC Symbol;Acc:HGNC:10099]	25970.5	0.559419	0.180502	3.09924	0.00194016	0.0244481
ENSG00000207501	RNVU1-14	RNA, variant U1 small nuclear 14 [Source:HGNC Symbol;Acc:HGNC:48319]	27.1971	-0.484688	0.391514	-1.23799	0.215721	0.550159
ENSG00000207507	RNU6-9	RNA, U6 small nuclear 9 [Source:HGNC Symbol;Acc:HGNC:34269]	15.5921	-0.118908	0.484907	-0.245219	0.806287	0.945824
ENSG00000207513	RNU1-3	RNA, U1 small nuclear 3 [Source:HGNC Symbol;Acc:HGNC:10130]	486.137	-0.184169	0.195916	-0.940038	0.347198	0.714058
ENSG00000207523	SNORA66	small nucleolar RNA, H/ACA box 66 [Source:HGNC Symbol;Acc:HGNC:10223]	121.603	-0.215075	0.256935	-0.83708	0.402547	0.765171
ENSG00000207547	MIR25	microRNA 25 [Source:HGNC Symbol;Acc:HGNC:31609]	43549.5	0.338892	0.169843	1.99533	0.0460071	0.234229
ENSG00000207548	MIR217	microRNA 217 [Source:HGNC Symbol;Acc:HGNC:31594]	508.192	-1.81234	0.329672	-5.49739	3.85454e-08	3.58232e-06
ENSG00000207550	MIR99B	microRNA 99b [Source:HGNC Symbol;Acc:HGNC:31651]	31038	0.0243505	0.175595	0.138674	0.889708	0.968166
ENSG00000207563	MIR23B	microRNA 23b [Source:HGNC Symbol;Acc:HGNC:31606]	3628.76	-0.602846	0.177503	-3.39625	0.000683147	0.0126085
ENSG00000207571	MIR615	microRNA 615 [Source:HGNC Symbol;Acc:HGNC:32871]	1244.85	-1.17255	0.193449	-6.06128	1.3504e-09	1.54465e-07
ENSG00000207582	MIR30B	microRNA 30b [Source:HGNC Symbol;Acc:HGNC:31625]	431.206	-0.21956	0.217809	-1.00804	0.313434	0.679556
ENSG00000207585	MIR181D	microRNA 181d [Source:HGNC Symbol;Acc:HGNC:32089]	81.4025	0.724263	0.302903	2.39108	0.0167991	0.119162
ENSG00000207586	MIR135A2	microRNA 135a-2 [Source:HGNC Symbol;Acc:HGNC:31521]	32.0903	1.53056	0.375696	4.07392	4.62277e-05	0.00171851
ENSG00000207590	MIR215	microRNA 215 [Source:HGNC Symbol;Acc:HGNC:31592]	10333.9	0.730334	0.294031	2.48387	0.0129965	0.0985452
ENSG00000207595	MIR181A2	microRNA 181a-2 [Source:HGNC Symbol;Acc:HGNC:31549]	3391.12	-0.755971	0.203565	-3.71366	0.000204281	0.00595619
ENSG00000207605	MIR191	microRNA 191 [Source:HGNC Symbol;Acc:HGNC:31561]	11185.8	0.267908	0.199603	1.34221	0.179529	0.496208
ENSG00000207607	MIR200A	microRNA 200a [Source:HGNC Symbol;Acc:HGNC:31578]	177.027	-0.326836	0.21893	-1.49288	0.135469	0.433897
ENSG00000207609	MIR491	microRNA 491 [Source:HGNC Symbol;Acc:HGNC:32076]	19.7681	-0.230216	0.450848	-0.510629	0.609611	0.897074
ENSG00000207611	MIR149	microRNA 149 [Source:HGNC Symbol;Acc:HGNC:31536]	20.1153	0.295207	0.434473	0.679459	0.496847	0.834948
ENSG00000207613	MIR181C	microRNA 181c [Source:HGNC Symbol;Acc:HGNC:31552]	42.5315	0.947942	0.373119	2.54059	0.0110667	0.0886205
ENSG00000207614	MIR193A	microRNA 193a [Source:HGNC Symbol;Acc:HGNC:31563]	262.881	-0.298575	0.201759	-1.47986	0.138911	0.438972
ENSG00000207617	MIR3074	microRNA 3074 [Source:HGNC Symbol;Acc:HGNC:38268]	25.9553	-0.648938	0.388026	-1.67241	0.0944443	0.361433
ENSG00000207624	MIR194-1	microRNA 194-1 [Source:HGNC Symbol;Acc:HGNC:31564]	3781.65	0.375716	0.27984	1.34261	0.179399	0.496208
ENSG00000207625	MIR128-2	microRNA 128-2 [Source:HGNC Symbol;Acc:HGNC:31511]	3005.27	-0.56581	0.222759	-2.54001	0.011085	0.0886205
ENSG00000207627	MIR581	microRNA 581 [Source:HGNC Symbol;Acc:HGNC:32837]	26.4045	-0.331101	0.411027	-0.805545	0.420505	0.770438
ENSG00000207628	MIR651	microRNA 651 [Source:HGNC Symbol;Acc:HGNC:32907]	201.389	-0.404365	0.218792	-1.84817	0.0645777	0.291876
ENSG00000207630	MIR7-3	microRNA 7-3 [Source:HGNC Symbol;Acc:HGNC:31640]	22436.8	-0.0358107	0.17508	-0.204539	0.837932	0.957729
ENSG00000207631	MIR641	microRNA 641 [Source:HGNC Symbol;Acc:HGNC:32897]	88.0152	-0.391711	0.255527	-1.53295	0.125288	0.413295
ENSG00000207632	MIR588	microRNA 588 [Source:HGNC Symbol;Acc:HGNC:32844]	10.5688	-0.394221	0.619168	-0.636695	0.524324	0.857722
ENSG00000207635	MIR499A	microRNA 499a [Source:HGNC Symbol;Acc:HGNC:32133]	11.7669	0.578464	0.53483	1.08159	0.279437	0.643224
ENSG00000207638	MIR99A	microRNA 99a [Source:HGNC Symbol;Acc:HGNC:31650]	15816.1	-0.134424	0.172809	-0.777875	0.436643	0.777591
ENSG00000207639	MIR193B	microRNA 193b [Source:HGNC Symbol;Acc:HGNC:32087]	121.829	-0.00504115	0.2375	-0.0212259	0.983065	0.994141
ENSG00000207651	MIR28	microRNA 28 [Source:HGNC Symbol;Acc:HGNC:31615]	8273.69	0.453055	0.207103	2.18759	0.0286997	0.172779
ENSG00000207654	MIR128-1	microRNA 128-1 [Source:HGNC Symbol;Acc:HGNC:31510]	5305.52	-0.671823	0.21069	-3.18869	0.00142921	0.019862
ENSG00000207691	MIR183	microRNA 183 [Source:HGNC Symbol;Acc:HGNC:31554]	10861.7	-0.39462	0.19866	-1.98641	0.0469881	0.235257
ENSG00000207696	MIR659	microRNA 659 [Source:HGNC Symbol;Acc:HGNC:32915]	23.0588	0.0273844	0.412581	0.0663734	0.947081	0.989954
ENSG00000207697	MIR573	microRNA 573 [Source:HGNC Symbol;Acc:HGNC:32829]	97.1832	0.0156432	0.259095	0.0603765	0.951856	0.992573
ENSG00000207698	MIR32	microRNA 32 [Source:HGNC Symbol;Acc:HGNC:31631]	658.899	-0.527311	0.186664	-2.82492	0.0047293	0.0484998
ENSG00000207701	MIR597	microRNA 597 [Source:HGNC Symbol;Acc:HGNC:32853]	10.7333	-0.645424	0.582655	-1.10773	0.267979	0.628391
ENSG00000207703	MIR7-2	microRNA 7-2 [Source:HGNC Symbol;Acc:HGNC:31639]	22429.2	-0.0528891	0.176623	-0.299447	0.764599	0.94271
ENSG00000207713	MIR200C	microRNA 200c [Source:HGNC Symbol;Acc:HGNC:31580]	48.0724	0.503662	0.367436	1.37074	0.170455	0.479212
ENSG00000207717	MIR551B	microRNA 551b [Source:HGNC Symbol;Acc:HGNC:32807]	19.0906	1.43762	0.448964	3.20208	0.00136439	0.01914
ENSG00000207721	MIR186	microRNA 186 [Source:HGNC Symbol;Acc:HGNC:31557]	1856.9	-0.410806	0.191122	-2.14945	0.0315988	0.183544
ENSG00000207725	MIR222	microRNA 222 [Source:HGNC Symbol;Acc:HGNC:31602]	4974.8	0.186896	0.1706	1.09552	0.273288	0.632989
ENSG00000207726	MIR455	microRNA 455 [Source:HGNC Symbol;Acc:HGNC:32344]	3230.93	-0.035015	0.184572	-0.18971	0.849537	0.958264
ENSG00000207729	MIR556	microRNA 556 [Source:HGNC Symbol;Acc:HGNC:32812]	19.311	0.417141	0.440887	0.946139	0.344078	0.71047
ENSG00000207730	MIR200B	microRNA 200b [Source:HGNC Symbol;Acc:HGNC:31579]	1035.45	-0.462896	0.225198	-2.05551	0.0398298	0.213502
ENSG00000207732	MIR218-1	microRNA 218-1 [Source:HGNC Symbol;Acc:HGNC:31595]	492.504	-0.45497	0.190925	-2.38298	0.0171733	0.119908
ENSG00000207737	MIR181B2	microRNA 181b-2 [Source:HGNC Symbol;Acc:HGNC:31551]	1788.53	-0.903794	0.206423	-4.37835	1.19583e-05	0.000592733
ENSG00000207739	MIR218-2	microRNA 218-2 [Source:HGNC Symbol;Acc:HGNC:31596]	153.971	-0.501438	0.219924	-2.28004	0.022605	0.143648
ENSG00000207741	MIR590	microRNA 590 [Source:HGNC Symbol;Acc:HGNC:32846]	80.1303	-0.0456818	0.269466	-0.169527	0.865382	0.960055
ENSG00000207744	MIR10B	microRNA 10b [Source:HGNC Symbol;Acc:HGNC:31498]	8610.31	-6.5761	0.204663	-32.1314	1.60817e-226	2.39135e-223
ENSG00000207751		novel transcript	153.463	-0.000974804	0.321495	-0.0030321	0.997581	0.999532
ENSG00000207755	MIR450A2	microRNA 450a-2 [Source:HGNC Symbol;Acc:HGNC:32137]	99.6291	-0.156272	0.256422	-0.609433	0.542237	0.86724
ENSG00000207756	MIR580	microRNA 580 [Source:HGNC Symbol;Acc:HGNC:32836]	31.1514	0.604327	0.489572	1.2344	0.217054	0.551725
ENSG00000207757	MIR93	microRNA 93 [Source:HGNC Symbol;Acc:HGNC:31645]	7448.47	0.158376	0.22448	0.705523	0.480485	0.820121
ENSG00000207758	MIR532	microRNA 532 [Source:HGNC Symbol;Acc:HGNC:32795]	8960.8	-0.279816	0.179485	-1.559	0.118997	0.40463
ENSG00000207759	MIR181A1	microRNA 181a-1 [Source:HGNC Symbol;Acc:HGNC:31590]	1827.94	-0.581695	0.217584	-2.67343	0.00750807	0.0660621
ENSG00000207768	MIR188	microRNA 188 [Source:HGNC Symbol;Acc:HGNC:31559]	19.8074	0.0137154	0.432843	0.0316867	0.974722	0.994141
ENSG00000207773	MIR642A	microRNA 642a [Source:HGNC Symbol;Acc:HGNC:32898]	39.6225	1.0976	0.349019	3.14482	0.00166187	0.0220643
ENSG00000207779	MIR15B	microRNA 15b [Source:HGNC Symbol;Acc:HGNC:31544]	1311.84	0.271248	0.183558	1.47773	0.139481	0.439424
ENSG00000207781	MIR625	microRNA 625 [Source:HGNC Symbol;Acc:HGNC:32881]	237.173	1.42272	0.206179	6.9004	5.18551e-12	1.28514e-09
ENSG00000207784	MIR542	microRNA 542 [Source:HGNC Symbol;Acc:HGNC:32534]	378.85	0.263518	0.704971	0.3738	0.708553	0.922559
ENSG00000207785	MIR500A	microRNA 500a [Source:HGNC Symbol;Acc:HGNC:32134]	1902.34	-0.273303	0.224515	-1.2173	0.223488	0.567111
ENSG00000207789	MIR26A2	microRNA 26a-2 [Source:HGNC Symbol;Acc:HGNC:31611]	7607.81	-0.0121489	0.171773	-0.0707265	0.943615	0.989954
ENSG00000207797	MIR187	microRNA 187 [Source:HGNC Symbol;Acc:HGNC:31558]	20.4038	-0.124772	0.435599	-0.286439	0.774542	0.944827
ENSG00000207798	MIR216A	microRNA 216a [Source:HGNC Symbol;Acc:HGNC:31593]	85.3688	-1.28762	0.372473	-3.45695	0.000546319	0.0111284
ENSG00000207805	MIR483	microRNA 483 [Source:HGNC Symbol;Acc:HGNC:32340]	1500.58	-1.14392	0.184983	-6.1839	6.25362e-10	9.29913e-08
ENSG00000207807	MIR95	microRNA 95 [Source:HGNC Symbol;Acc:HGNC:31647]	1674.99	-0.317439	0.177998	-1.78338	0.0745243	0.314823
ENSG00000207808	MIR27A	microRNA 27a [Source:HGNC Symbol;Acc:HGNC:31613]	3556.27	0.108233	0.176653	0.612689	0.540082	0.866345
ENSG00000207827	MIR30A	microRNA 30a [Source:HGNC Symbol;Acc:HGNC:31624]	5878.87	-0.016549	0.252343	-0.0655813	0.947711	0.989954
ENSG00000207839	MIR33B	microRNA 33b [Source:HGNC Symbol;Acc:HGNC:32791]	17.2406	0.319062	0.447041	0.713719	0.475401	0.816306
ENSG00000207863	MIR125B2	microRNA 125b-2 [Source:HGNC Symbol;Acc:HGNC:31507]	1614.28	-0.0420087	0.19539	-0.214999	0.829768	0.95348
ENSG00000207864	MIR27B	microRNA 27b [Source:HGNC Symbol;Acc:HGNC:31614]	50734.5	-0.582521	0.172672	-3.37357	0.000741989	0.0126085
ENSG00000207870	MIR221	microRNA 221 [Source:HGNC Symbol;Acc:HGNC:31601]	4125.53	-0.0500952	0.163183	-0.306988	0.758852	0.941914
ENSG00000207924	MIR196A2	microRNA 196a-2 [Source:HGNC Symbol;Acc:HGNC:31568]	2353.66	0.0696372	0.185062	0.376291	0.706701	0.922559
ENSG00000207931	MIR577	microRNA 577 [Source:HGNC Symbol;Acc:HGNC:32833]	20.7666	-0.0678099	0.44813	-0.151318	0.879725	0.96649
ENSG00000207932	MIR33A	microRNA 33a [Source:HGNC Symbol;Acc:HGNC:31634]	306.227	0.228844	0.196967	1.16184	0.2453	0.592143
ENSG00000207933	MIR9-1	microRNA 9-1 [Source:HGNC Symbol;Acc:HGNC:31641]	13.1328	0.0870758	0.557717	0.156129	0.875931	0.963763
ENSG00000207935	MIR204	microRNA 204 [Source:HGNC Symbol;Acc:HGNC:31582]	82.0872	0.120272	0.30435	0.395176	0.692713	0.917243
ENSG00000207944	MIR574	microRNA 574 [Source:HGNC Symbol;Acc:HGNC:32830]	60.3849	0.254751	0.304342	0.837054	0.402562	0.765171
ENSG00000207947	MIR152	microRNA 152 [Source:HGNC Symbol;Acc:HGNC:31538]	502.235	0.365415	0.236102	1.5477	0.121693	0.412206
ENSG00000207948	MIR328	microRNA 328 [Source:HGNC Symbol;Acc:HGNC:31770]	107.501	0.427436	0.242096	1.76556	0.0774697	0.321781
ENSG00000207951	MIR561	microRNA 561 [Source:HGNC Symbol;Acc:HGNC:32817]	38.9686	1.67493	0.336344	4.97982	6.36424e-07	4.30165e-05
ENSG00000207952	MIR624	microRNA 624 [Source:HGNC Symbol;Acc:HGNC:32880]	22.4147	-0.127494	0.401828	-0.317285	0.751027	0.936837
ENSG00000207956	MIR579	microRNA 579 [Source:HGNC Symbol;Acc:HGNC:32835]	20.5618	0.579273	0.415814	1.39311	0.163588	0.469604
ENSG00000207962	MIR30C1	microRNA 30c-1 [Source:HGNC Symbol;Acc:HGNC:31626]	4007.56	-0.0643383	0.167294	-0.384582	0.700547	0.920241
ENSG00000207965	MIR629	microRNA 629 [Source:HGNC Symbol;Acc:HGNC:32885]	1236.75	0.420415	0.176468	2.38239	0.0172007	0.119908
ENSG00000207970	MIR660	microRNA 660 [Source:HGNC Symbol;Acc:HGNC:32916]	565.117	-0.32376	0.193904	-1.66969	0.0949801	0.362142
ENSG00000207971	MIR125B1	microRNA 125b-1 [Source:HGNC Symbol;Acc:HGNC:31506]	346.786	-0.236613	0.197922	-1.19549	0.231897	0.577606
ENSG00000207973	MIR589	microRNA 589 [Source:HGNC Symbol;Acc:HGNC:32845]	1445.22	-0.330186	0.182588	-1.80837	0.0705495	0.304963
ENSG00000207975	MIR181B1	microRNA 181b-1 [Source:HGNC Symbol;Acc:HGNC:31550]	781.126	-0.703371	0.259701	-2.70839	0.00676114	0.0632315
ENSG00000207980	MIR23A	microRNA 23a [Source:HGNC Symbol;Acc:HGNC:31605]	1597.97	-0.138784	0.241505	-0.574663	0.565519	0.882024
ENSG00000207988	MIR576	microRNA 576 [Source:HGNC Symbol;Acc:HGNC:32832]	82.822	0.252689	0.289702	0.872237	0.383079	0.743741
ENSG00000207990	MIR182	microRNA 182 [Source:HGNC Symbol;Acc:HGNC:31553]	27443.8	0.0265231	0.271841	0.0975682	0.922275	0.97833
ENSG00000207994	MIR100	microRNA 100 [Source:HGNC Symbol;Acc:HGNC:31487]	8618.15	-1.51086	0.182763	-8.2668	1.37606e-16	6.82067e-14
ENSG00000207996	MIR301A	microRNA 301a [Source:HGNC Symbol;Acc:HGNC:31622]	92.8859	-0.790989	0.280507	-2.81986	0.00480453	0.0489338
ENSG00000208005	MIR503	microRNA 503 [Source:HGNC Symbol;Acc:HGNC:32138]	225.876	-0.041457	0.284741	-0.145596	0.884241	0.967156
ENSG00000208006	MIR16-1	microRNA 16-1 [Source:HGNC Symbol;Acc:HGNC:31545]	310.142	0.310534	0.206421	1.50438	0.132484	0.42827
ENSG00000208008	MIR125A	microRNA 125a [Source:HGNC Symbol;Acc:HGNC:31505]	4481.97	0.0728015	0.173998	0.418405	0.675651	0.915049
ENSG00000208009	MIR130A	microRNA 130a [Source:HGNC Symbol;Acc:HGNC:31514]	231.888	0.541947	0.22716	2.38575	0.0170445	0.119908
ENSG00000208012	MIRLET7F2	microRNA let-7f-2 [Source:HGNC Symbol;Acc:HGNC:31484]	1153.85	-0.00463452	0.210198	-0.0220484	0.982409	0.994141
ENSG00000208013	MIR652	microRNA 652 [Source:HGNC Symbol;Acc:HGNC:32908]	256.896	0.280996	0.203815	1.37868	0.167994	0.477643
ENSG00000208014	MIR653	microRNA 653 [Source:HGNC Symbol;Acc:HGNC:32909]	102.491	0.44088	0.267784	1.6464	0.0996819	0.371496
ENSG00000208015	MIR362	microRNA 362 [Source:HGNC Symbol;Acc:HGNC:32022]	203.402	-0.343532	0.207893	-1.65245	0.0984429	0.371184
ENSG00000208017	MIR140	microRNA 140 [Source:HGNC Symbol;Acc:HGNC:31527]	12844	0.386831	0.29141	1.32745	0.184361	0.505976
ENSG00000208022	MIR618	microRNA 618 [Source:HGNC Symbol;Acc:HGNC:32874]	520.612	0.0926146	0.193849	0.477767	0.632816	0.903114
ENSG00000208023	MIR185	microRNA 185 [Source:HGNC Symbol;Acc:HGNC:31556]	2108.96	-0.269267	0.283432	-0.950022	0.342101	0.70949
ENSG00000208036	MIR106B	microRNA 106b [Source:HGNC Symbol;Acc:HGNC:31495]	9235.34	0.401141	0.188844	2.1242	0.0336538	0.190278
ENSG00000208037	MIR320A	microRNA 320a [Source:HGNC Symbol;Acc:HGNC:31632]	9861.01	0.0189386	0.177009	0.106992	0.914795	0.977505
ENSG00000208772	SNORD94	small nucleolar RNA, C/D box 94 [Source:HGNC Symbol;Acc:HGNC:32756]	191.662	-0.090575	0.234009	-0.387058	0.698713	0.918644
ENSG00000208797	SNORD73A	small nucleolar RNA, C/D box 73A [Source:HGNC Symbol;Acc:HGNC:10235]	307.856	0.425945	0.237571	1.79292	0.072986	0.310458
ENSG00000208892	SNORA49	small nucleolar RNA, H/ACA box 49 [Source:HGNC Symbol;Acc:HGNC:32642]	11.6224	0.068341	0.53094	0.128717	0.897581	0.9714
ENSG00000209042	SNORD12C	small nucleolar RNA, C/D box 12C [Source:HGNC Symbol;Acc:HGNC:10105]	2477.18	0.408809	0.211533	1.9326	0.0532852	0.25154
ENSG00000209082	MT-TL1	mitochondrially encoded tRNA-Leu (UUA/G) 1 [Source:HGNC Symbol;Acc:HGNC:7490]	276.944	-0.398854	0.20541	-1.94175	0.0521678	0.2498
ENSG00000209480	SNORD83B	small nucleolar RNA, C/D box 83B [Source:HGNC Symbol;Acc:HGNC:17132]	508.129	0.175025	0.18048	0.969771	0.332161	0.697631
ENSG00000209482	SNORD83A	small nucleolar RNA, C/D box 83A [Source:HGNC Symbol;Acc:HGNC:17131]	9172.56	-0.0820365	0.168799	-0.486002	0.626966	0.902562
ENSG00000209582	SNORA48	small nucleolar RNA, H/ACA box 48 [Source:HGNC Symbol;Acc:HGNC:32641]	41.9132	0.548335	0.333931	1.64206	0.100577	0.37224
ENSG00000209645	SNORD105	small nucleolar RNA, C/D box 105 [Source:HGNC Symbol;Acc:HGNC:32769]	519.297	0.0787294	0.190086	0.414179	0.678743	0.915049
ENSG00000209702	SNORD41	small nucleolar RNA, C/D box 41 [Source:HGNC Symbol;Acc:HGNC:10179]	8380.45	0.0130903	0.192463	0.0680149	0.945774	0.989954
ENSG00000210049	MT-TF	mitochondrially encoded tRNA-Phe (UUU/C) [Source:HGNC Symbol;Acc:HGNC:7481]	993.621	-0.318086	0.219858	-1.44678	0.14796	0.455945
ENSG00000210077	MT-TV	mitochondrially encoded tRNA-Val (GUN) [Source:HGNC Symbol;Acc:HGNC:7500]	1401.91	-0.269715	0.171625	-1.57154	0.116058	0.402363
ENSG00000210082	MT-RNR2	mitochondrially encoded 16S rRNA [Source:HGNC Symbol;Acc:HGNC:7471]	4453.62	0.127255	0.222044	0.573107	0.566572	0.882024
ENSG00000210100	MT-TI	mitochondrially encoded tRNA-Ile (AUU/C) [Source:HGNC Symbol;Acc:HGNC:7488]	24.1274	0.156386	0.394874	0.396039	0.692077	0.917243
ENSG00000210107	MT-TQ	mitochondrially encoded tRNA-Gln (CAA/G) [Source:HGNC Symbol;Acc:HGNC:7495]	247.161	-0.146571	0.260938	-0.561706	0.574316	0.884124
ENSG00000210112	MT-TM	mitochondrially encoded tRNA-Met (AUA/G) [Source:HGNC Symbol;Acc:HGNC:7492]	72.413	-0.261769	0.266585	-0.981934	0.326132	0.689726
ENSG00000210117	MT-TW	mitochondrially encoded tRNA-Trp (UGA/G) [Source:HGNC Symbol;Acc:HGNC:7501]	21.3674	-0.40332	0.435251	-0.926639	0.354114	0.721326
ENSG00000210127	MT-TA	mitochondrially encoded tRNA-Ala (GCN) [Source:HGNC Symbol;Acc:HGNC:7475]	12.2682	0.222013	0.547077	0.405817	0.684877	0.916518
ENSG00000210135	MT-TN	mitochondrially encoded tRNA-Asn (AAU/C) [Source:HGNC Symbol;Acc:HGNC:7493]	201.082	0.155453	0.217089	0.71608	0.473942	0.814742
ENSG00000210140	MT-TC	mitochondrially encoded tRNA-Cys (UGU/C) [Source:HGNC Symbol;Acc:HGNC:7477]	41.3363	-0.05201	0.321585	-0.16173	0.871518	0.962099
ENSG00000210144	MT-TY	mitochondrially encoded tRNA-Tyr (UAU/C) [Source:HGNC Symbol;Acc:HGNC:7502]	181.506	0.166305	0.226717	0.733537	0.463231	0.800959
ENSG00000210151	MT-TS1	mitochondrially encoded tRNA-Ser (UCN) 1 [Source:HGNC Symbol;Acc:HGNC:7497]	25.9069	-0.0438348	0.435466	-0.100662	0.919819	0.977505
ENSG00000210156	MT-TK	mitochondrially encoded tRNA-Lys (AAA/G) [Source:HGNC Symbol;Acc:HGNC:7489]	460.973	-0.674253	0.250959	-2.6867	0.00721615	0.0650329
ENSG00000210174	MT-TR	mitochondrially encoded tRNA-Arg (CGN) [Source:HGNC Symbol;Acc:HGNC:7496]	10.476	-0.828187	0.588337	-1.40768	0.159227	0.466581
ENSG00000210176	MT-TH	mitochondrially encoded tRNA-His (CAU/C) [Source:HGNC Symbol;Acc:HGNC:7487]	328.605	0.189601	0.217623	0.871237	0.383625	0.743741
ENSG00000210184	MT-TS2	mitochondrially encoded tRNA-Ser (AGU/C) 2 [Source:HGNC Symbol;Acc:HGNC:7498]	1606.19	0.00333723	0.215832	0.0154621	0.987663	0.996374
ENSG00000210191	MT-TL2	mitochondrially encoded tRNA-Leu (CUN) 2 [Source:HGNC Symbol;Acc:HGNC:7491]	80.6915	-0.0277023	0.294534	-0.0940547	0.925066	0.979274
ENSG00000210194	MT-TE	mitochondrially encoded tRNA-Glu (GAA/G) [Source:HGNC Symbol;Acc:HGNC:7479]	1082.06	0.261316	0.25492	1.02509	0.305322	0.673017
ENSG00000210195	MT-TT	mitochondrially encoded tRNA-Thr (ACN) [Source:HGNC Symbol;Acc:HGNC:7499]	33.3996	-0.306251	0.391383	-0.782483	0.43393	0.773687
ENSG00000210196	MT-TP	mitochondrially encoded tRNA-Pro (CCN) [Source:HGNC Symbol;Acc:HGNC:7494]	230.933	-0.00841221	0.235146	-0.0357744	0.971462	0.994141
ENSG00000210741	MIR196A1	microRNA 196a-1 [Source:HGNC Symbol;Acc:HGNC:31567]	679.822	0.0400556	0.194376	0.206073	0.836734	0.957729
ENSG00000210825	SNORA40	small nucleolar RNA, H/ACA box 40 [Source:HGNC Symbol;Acc:HGNC:32633]	15.0073	0.876531	0.519601	1.68693	0.0916167	0.35566
ENSG00000211137	MIR190A	microRNA 190a [Source:HGNC Symbol;Acc:HGNC:31560]	31.7211	0.567548	0.353635	1.6049	0.108516	0.391924
ENSG00000211459	MT-RNR1	mitochondrially encoded 12S rRNA [Source:HGNC Symbol;Acc:HGNC:7470]	3992.73	0.0304812	0.229471	0.132832	0.894326	0.970695
ENSG00000211491	MIR320D1	microRNA 320d-1 [Source:HGNC Symbol;Acc:HGNC:35386]	12.8055	0.125849	0.508533	0.247475	0.80454	0.945824
ENSG00000211514	MIR454	microRNA 454 [Source:HGNC Symbol;Acc:HGNC:33137]	302.966	-0.233704	0.194064	-1.20426	0.228488	0.573112
ENSG00000211520	MIR216B	microRNA 216b [Source:HGNC Symbol;Acc:HGNC:33668]	147.071	-1.50088	0.310382	-4.83559	1.32753e-06	8.58278e-05
ENSG00000211538	MIR501	microRNA 501 [Source:HGNC Symbol;Acc:HGNC:32135]	946.915	-0.198387	0.201889	-0.98265	0.32578	0.689726
ENSG00000211543	MIR320B1	microRNA 320b-1 [Source:HGNC Symbol;Acc:HGNC:35247]	531.363	-0.133087	0.189459	-0.702455	0.482395	0.820734
ENSG00000211575	MIR760	microRNA 760 [Source:HGNC Symbol;Acc:HGNC:33666]	50.629	-0.592829	0.302086	-1.96245	0.0497103	0.243958
ENSG00000211578	MIR766	microRNA 766 [Source:HGNC Symbol;Acc:HGNC:33139]	13.5812	-0.986969	0.536119	-1.84095	0.0656289	0.293063
ENSG00000211580	MIR769	microRNA 769 [Source:HGNC Symbol;Acc:HGNC:33138]	2127.22	0.0514892	0.185715	0.277249	0.781589	0.945684
ENSG00000212017	MIR548U	microRNA 548u [Source:HGNC Symbol;Acc:HGNC:38316]	13.3873	-0.280694	0.500143	-0.561227	0.574643	0.884124
ENSG00000212027	MIR374B	microRNA 374b [Source:HGNC Symbol;Acc:HGNC:33665]	5396.23	0.0815452	0.163426	0.498975	0.617797	0.898889
ENSG00000212051	MIR320C2	microRNA 320c-2 [Source:HGNC Symbol;Acc:HGNC:35387]	69.5597	-0.348173	0.276949	-1.25717	0.208691	0.544426
ENSG00000212102	MIR301B	microRNA 301b [Source:HGNC Symbol;Acc:HGNC:33667]	10.8711	-0.454662	0.563869	-0.806326	0.420055	0.770438
ENSG00000212135	SNORD67	small nucleolar RNA, C/D box 67 [Source:HGNC Symbol;Acc:HGNC:32728]	22.6236	0.313093	0.398952	0.784788	0.432578	0.772201
ENSG00000212153	RNU1-82P	RNA, U1 small nuclear 82, pseudogene [Source:HGNC Symbol;Acc:HGNC:48424]	58.8638	-0.062155	0.289818	-0.214462	0.830186	0.95348
ENSG00000212158	SNORD66	small nucleolar RNA, C/D box 66 [Source:HGNC Symbol;Acc:HGNC:32727]	531.149	0.234164	0.183188	1.27827	0.201153	0.533181
ENSG00000212163	SNORD91A	small nucleolar RNA, C/D box 91A [Source:HGNC Symbol;Acc:HGNC:32752]	581.606	-0.0870899	0.186275	-0.467534	0.640118	0.903114
ENSG00000212171	RNA5SP86	RNA, 5S ribosomal pseudogene 86 [Source:HGNC Symbol;Acc:HGNC:42884]	39.4881	-0.644927	0.340605	-1.89348	0.0582946	0.268372
ENSG00000212176	RNA5SP207	RNA, 5S ribosomal pseudogene 207 [Source:HGNC Symbol;Acc:HGNC:43107]	13.4071	0.041998	0.497766	0.0843729	0.93276	0.982439
ENSG00000212182			24.1639	-0.45082	0.40382	-1.11639	0.264257	0.622741
ENSG00000212195			21.5675	0.480238	0.425472	1.12872	0.259016	0.616251
ENSG00000212232	SNORD17	small nucleolar RNA, C/D box 17 [Source:HGNC Symbol;Acc:HGNC:32713]	5743.14	0.709656	0.185681	3.82191	0.000132423	0.00401862
ENSG00000212283	SNORD89	small nucleolar RNA, C/D box 89 [Source:HGNC Symbol;Acc:HGNC:32750]	78.8862	0.451669	0.267585	1.68794	0.0914223	0.35566
ENSG00000212296	SNORD72	small nucleolar RNA, C/D box 72 [Source:HGNC Symbol;Acc:HGNC:32733]	540.682	0.236651	0.198388	1.19287	0.23292	0.578714
ENSG00000212304	SNORD12	small nucleolar RNA, C/D box 12 [Source:HGNC Symbol;Acc:HGNC:32708]	25556	0.545288	0.185056	2.9466	0.00321285	0.0356531
ENSG00000212306			74.1372	-0.911947	0.328639	-2.77492	0.00552149	0.0543739
ENSG00000212309	SNORD70B	small nucleolar RNA, C/D box 70B [Source:HGNC Symbol;Acc:HGNC:52233]	1730.44	-0.152927	0.194134	-0.787738	0.43085	0.77101
ENSG00000212378			11.3876	-0.639929	0.639841	-1.00014	0.317244	0.686669
ENSG00000212396	RNA5SP323	RNA, 5S ribosomal pseudogene 323 [Source:HGNC Symbol;Acc:HGNC:43223]	16.3474	-0.887877	0.49212	-1.80419	0.0712021	0.306004
ENSG00000212402	SNORA74B	small nucleolar RNA, H/ACA box 74B [Source:HGNC Symbol;Acc:HGNC:32660]	70.6064	0.305107	0.294681	1.03538	0.300492	0.667909
ENSG00000212409	RNY4P18	RNY4 pseudogene 18 [Source:HGNC Symbol;Acc:HGNC:34068]	18.0113	-0.370986	0.449489	-0.825349	0.409173	0.766298
ENSG00000212421			10.567	-0.271946	0.600801	-0.452638	0.650809	0.908689
ENSG00000212433	RNA5SP252	RNA, 5S ribosomal pseudogene 252 [Source:HGNC Symbol;Acc:HGNC:43152]	35.1485	-0.00244566	0.385658	-0.00634153	0.99494	0.998971
ENSG00000212443	SNORA53	small nucleolar RNA, H/ACA box 53 [Source:HGNC Symbol;Acc:HGNC:32646]	112.042	0.133614	0.271255	0.492578	0.622311	0.902442
ENSG00000212447	SNORD90	small nucleolar RNA, C/D box 90 [Source:HGNC Symbol;Acc:HGNC:32751]	483.587	-0.259825	0.199445	-1.30275	0.192662	0.517779
ENSG00000212448			178.567	-1.03274	0.242342	-4.26149	2.03069e-05	0.000943636
ENSG00000212452	SNORD69	small nucleolar RNA, C/D box 69 [Source:HGNC Symbol;Acc:HGNC:32730]	12937.6	0.507491	0.177029	2.8667	0.00414774	0.0437425
ENSG00000212464	SNORA12	small nucleolar RNA, H/ACA box 12 [Source:HGNC Symbol;Acc:HGNC:32600]	10.6279	0.365266	0.552287	0.661371	0.508375	0.845089
ENSG00000212498	SNORD86	small nucleolar RNA, C/D box 86 [Source:HGNC Symbol;Acc:HGNC:32745]	46.169	-0.307383	0.310791	-0.989033	0.322647	0.689726
ENSG00000212534	SNORD70	small nucleolar RNA, C/D box 70 [Source:HGNC Symbol;Acc:HGNC:32731]	3708.38	-0.0729271	0.181701	-0.401357	0.688157	0.916518
ENSG00000212588	SNORA26	small nucleolar RNA, H/ACA box 26 [Source:HGNC Symbol;Acc:HGNC:32616]	161.375	0.234605	0.226842	1.03422	0.301032	0.66811
ENSG00000212607	SNORA3B	small nucleolar RNA, H/ACA box 3B [Source:HGNC Symbol;Acc:HGNC:32638]	229.537	0.177958	0.209928	0.84771	0.396599	0.758025
ENSG00000212907	MT-ND4L	mitochondrially encoded NADH:ubiquinone oxidoreductase core subunit 4L [Source:HGNC Symbol;Acc:HGNC:7460]	75.9458	0.205224	0.268223	0.765124	0.444198	0.78474
ENSG00000213171	LINGO4	leucine rich repeat and Ig domain containing 4 [Source:HGNC Symbol;Acc:HGNC:31814]	19.2901	0.628005	0.433748	1.44786	0.147657	0.455945
ENSG00000214756	CSKMT	citrate synthase lysine methyltransferase [Source:HGNC Symbol;Acc:HGNC:33113]	758.224	1.01714	0.181677	5.59863	2.16052e-08	2.1418e-06
ENSG00000215021	PHB2	prohibitin 2 [Source:HGNC Symbol;Acc:HGNC:30306]	64.1505	0.404698	0.284112	1.42443	0.154322	0.458954
ENSG00000215301	DDX3X	DEAD-box helicase 3 X-linked [Source:HGNC Symbol;Acc:HGNC:2745]	15.876	0.680854	0.476065	1.43017	0.152668	0.457969
ENSG00000215386	MIR99AHG	mir-99a-let-7c cluster host gene [Source:HGNC Symbol;Acc:HGNC:1274]	1617.81	-0.0415745	0.195032	-0.213168	0.831196	0.953695
ENSG00000215417	MIR17HG	miR-17-92a-1 cluster host gene [Source:HGNC Symbol;Acc:HGNC:23564]	89569.7	-0.0904333	0.184288	-0.490717	0.623627	0.902442
ENSG00000215930	MIR942	microRNA 942 [Source:HGNC Symbol;Acc:HGNC:33688]	84.4046	0.28555	0.268634	1.06297	0.287794	0.654915
ENSG00000216001	MIR450B	microRNA 450b [Source:HGNC Symbol;Acc:HGNC:33642]	534.132	-0.195509	0.216365	-0.903611	0.366201	0.727025
ENSG00000216009	MIR874	microRNA 874 [Source:HGNC Symbol;Acc:HGNC:33643]	38.0196	-1.19434	0.340271	-3.50997	0.000448158	0.00980016
ENSG00000216101	MIR877	microRNA 877 [Source:HGNC Symbol;Acc:HGNC:33660]	100.703	-0.777882	0.351159	-2.21519	0.0267473	0.163005
ENSG00000216135	MIR885	microRNA 885 [Source:HGNC Symbol;Acc:HGNC:33659]	857.742	0.164367	0.207873	0.790711	0.429113	0.77101
ENSG00000216141	MIR941-2	microRNA 941-2 [Source:HGNC Symbol;Acc:HGNC:33685]	622.149	0.181746	0.189876	0.957183	0.338475	0.703933
ENSG00000216195	MIR941-4	microRNA 941-4 [Source:HGNC Symbol;Acc:HGNC:33687]	622.029	0.192604	0.178997	1.07602	0.281919	0.647934
ENSG00000220988	SNORD88C	small nucleolar RNA, C/D box 88C [Source:HGNC Symbol;Acc:HGNC:32749]	9535.49	0.576458	0.188377	3.06013	0.00221238	0.0263185
ENSG00000221052	MIR1266	microRNA 1266 [Source:HGNC Symbol;Acc:HGNC:35334]	28.5673	-0.569736	0.37113	-1.53514	0.12475	0.413295
ENSG00000221063	MIR1296	microRNA 1296 [Source:HGNC Symbol;Acc:HGNC:35249]	139.939	-0.486025	0.247209	-1.96605	0.049293	0.243517
ENSG00000221066	SNORD111	small nucleolar RNA, C/D box 111 [Source:HGNC Symbol;Acc:HGNC:32776]	1979.57	0.133331	0.187504	0.711087	0.477031	0.817217
ENSG00000221116	SNORD110	small nucleolar RNA, C/D box 110 [Source:HGNC Symbol;Acc:HGNC:32775]	8428.21	0.334389	0.16596	2.01488	0.0439173	0.229141
ENSG00000221164	SNORA11F	small nucleolar RNA, H/ACA box 11F [Source:HGNC Symbol;Acc:HGNC:52189]	14.919	0.272757	0.495842	0.550089	0.582258	0.886201
ENSG00000221184			13.3755	0.790251	0.518674	1.5236	0.127609	0.418884
ENSG00000221214	MIR548E	microRNA 548e [Source:HGNC Symbol;Acc:HGNC:35275]	161.461	-0.156226	0.263852	-0.592097	0.553785	0.869763
ENSG00000221241	SNORD88A	small nucleolar RNA, C/D box 88A [Source:HGNC Symbol;Acc:HGNC:32747]	373.618	0.453996	0.202113	2.24625	0.0246883	0.154901
ENSG00000221251	MIR1263	microRNA 1263 [Source:HGNC Symbol;Acc:HGNC:35329]	56.9867	-0.12676	0.316489	-0.40052	0.688774	0.916518
ENSG00000221265	MIR1255A	microRNA 1255a [Source:HGNC Symbol;Acc:HGNC:35320]	79.548	0.277047	0.261005	1.06146	0.28848	0.654915
ENSG00000221303	SNORA79	small nucleolar RNA, H/ACA box 79 [Source:HGNC Symbol;Acc:HGNC:32665]	108.006	-0.624181	0.702096	-0.889025	0.37399	0.735612
ENSG00000221333	MIR548K	microRNA 548k [Source:HGNC Symbol;Acc:HGNC:35285]	137.828	-0.374176	0.242816	-1.54099	0.12332	0.413295
ENSG00000221381	SNORD88B	small nucleolar RNA, C/D box 88B [Source:HGNC Symbol;Acc:HGNC:32748]	542.014	0.638582	0.189838	3.36382	0.000768718	0.0128436
ENSG00000221390	MIR1295A	microRNA 1295a [Source:HGNC Symbol;Acc:HGNC:35288]	138.469	-0.549417	0.257389	-2.13458	0.0327957	0.187566
ENSG00000221406	MIR320B2	microRNA 320b-2 [Source:HGNC Symbol;Acc:HGNC:35256]	129.601	-0.181211	0.229329	-0.79018	0.429423	0.77101
ENSG00000221420	SNORA81	small nucleolar RNA, H/ACA box 81 [Source:HGNC Symbol;Acc:HGNC:32667]	80.0008	-1.0338	0.388985	-2.65769	0.00786773	0.068417
ENSG00000221430	MIR1294	microRNA 1294 [Source:HGNC Symbol;Acc:HGNC:35287]	12.5353	-0.55152	0.542546	-1.01654	0.309372	0.677521
ENSG00000221445	MIR1301	microRNA 1301 [Source:HGNC Symbol;Acc:HGNC:35253]	41.8048	-0.382322	0.338259	-1.13027	0.258365	0.615686
ENSG00000221461			25.639	-0.809163	0.406712	-1.98952	0.0466434	0.234964
ENSG00000221464	MIR1271	microRNA 1271 [Source:HGNC Symbol;Acc:HGNC:35252]	15.8371	0.0112404	0.471137	0.0238581	0.980966	0.994141
ENSG00000221491	SNORA2C	small nucleolar RNA, H/ACA box 2C [Source:HGNC Symbol;Acc:HGNC:32624]	3950.82	0.195301	0.165397	1.1808	0.237683	0.583224
ENSG00000221493	MIR320C1	microRNA 320c-1 [Source:HGNC Symbol;Acc:HGNC:35248]	64.2218	0.053058	0.294022	0.180456	0.856795	0.959481
ENSG00000221500	SNORD100	small nucleolar RNA, C/D box 100 [Source:HGNC Symbol;Acc:HGNC:32763]	8164.09	-0.273604	0.189753	-1.4419	0.149332	0.456783
ENSG00000221510	MIR548O	microRNA 548o [Source:HGNC Symbol;Acc:HGNC:35333]	65.5938	-0.114948	0.280143	-0.410319	0.681572	0.916518
ENSG00000221514	SNORD111B	small nucleolar RNA, C/D box 111B [Source:HGNC Symbol;Acc:HGNC:33579]	680.081	-0.094003	0.201473	-0.466578	0.640802	0.903114
ENSG00000221539	SNORD99	small nucleolar RNA, C/D box 99 [Source:HGNC Symbol;Acc:HGNC:32762]	10543.1	0.511147	0.242776	2.10543	0.0352543	0.195609
ENSG00000221540	MIR1180	microRNA 1180 [Source:HGNC Symbol;Acc:HGNC:35261]	341.114	-0.21139	0.20881	-1.01235	0.311369	0.678254
ENSG00000221552	MIR1303	microRNA 1303 [Source:HGNC Symbol;Acc:HGNC:35301]	65.8793	-0.112744	0.286284	-0.393819	0.693715	0.917753
ENSG00000221563	MIR1269A	microRNA 1269a [Source:HGNC Symbol;Acc:HGNC:35337]	15152.6	-0.165189	0.182517	-0.90506	0.365433	0.72647
ENSG00000221585	MIR1226	microRNA 1226 [Source:HGNC Symbol;Acc:HGNC:33922]	45.4342	-1.05872	0.318877	-3.32014	0.000899728	0.0146716
ENSG00000221634	MIR1276	microRNA 1276 [Source:HGNC Symbol;Acc:HGNC:35347]	11.9755	-0.506332	0.543499	-0.931614	0.351536	0.717056
ENSG00000221643	SNORA77	small nucleolar RNA, H/ACA box 77 [Source:HGNC Symbol;Acc:HGNC:32663]	30.9042	0.650448	0.376714	1.72664	0.0842331	0.339083
ENSG00000221676	RNU6ATAC	RNA, U6atac small nuclear (U12-dependent splicing) [Source:HGNC Symbol;Acc:HGNC:34017]	10.8407	-0.715325	0.562818	-1.27097	0.203739	0.537164
ENSG00000221680	MIR1278	microRNA 1278 [Source:HGNC Symbol;Acc:HGNC:35356]	138.495	-0.244038	0.268881	-0.907603	0.364088	0.72647
ENSG00000221740	SNORD93	small nucleolar RNA, C/D box 93 [Source:HGNC Symbol;Acc:HGNC:32755]	1209.73	0.414822	0.181757	2.28229	0.0224721	0.143416
ENSG00000221788	MIR1252	microRNA 1252 [Source:HGNC Symbol;Acc:HGNC:35365]	11.8263	0.690636	0.54205	1.27412	0.202622	0.535166
ENSG00000222076	RNU2-3P	RNA, U2 small nuclear 3, pseudogene [Source:HGNC Symbol;Acc:HGNC:10153]	71.1536	0.116416	0.26771	0.434858	0.663666	0.91138
ENSG00000222129	RNA5SP36	RNA, 5S ribosomal pseudogene 36 [Source:HGNC Symbol;Acc:HGNC:42612]	10.9027	0.314179	0.57106	0.550169	0.582203	0.886201
ENSG00000222148	RNY4P30	RNY4 pseudogene 30 [Source:HGNC Symbol;Acc:HGNC:42498]	62.9216	-0.867509	0.312401	-2.77691	0.0054878	0.0543739
ENSG00000222276	RNU2-33P	RNA, U2 small nuclear 33, pseudogene [Source:HGNC Symbol;Acc:HGNC:48526]	254.384	0.532369	0.201672	2.63978	0.00829607	0.0717224
ENSG00000222293	RNU2-36P	RNA, U2 small nuclear 36, pseudogene [Source:HGNC Symbol;Acc:HGNC:48529]	181.283	0.747712	0.30817	2.4263	0.0152537	0.110645
ENSG00000222328	RNU2-2P	RNA, U2 small nuclear 2, pseudogene [Source:HGNC Symbol;Acc:HGNC:10152]	1256.45	0.248326	0.204873	1.21209	0.225476	0.568921
ENSG00000222345	SNORD19C	small nucleolar RNA, C/D box 19C [Source:HGNC Symbol;Acc:HGNC:52224]	16134.8	0.499113	0.254813	1.95874	0.0501429	0.244467
ENSG00000222355	RNU2-29P	RNA, U2 small nuclear 29, pseudogene [Source:HGNC Symbol;Acc:HGNC:48522]	14.2792	0.605707	0.503871	1.20211	0.229322	0.573112
ENSG00000222365	SNORD12B	small nucleolar RNA, C/D box 12B [Source:HGNC Symbol;Acc:HGNC:33573]	5705.38	0.394256	0.198282	1.98836	0.0467716	0.234964
ENSG00000222370	SNORA36B	small nucleolar RNA, H/ACA box 36B [Source:HGNC Symbol;Acc:HGNC:32629]	82.3148	0.130288	0.282293	0.461534	0.644415	0.904859
ENSG00000222378	RNA5SP44	RNA, 5S ribosomal pseudogene 44 [Source:HGNC Symbol;Acc:HGNC:42820]	16.7922	-0.620256	0.471525	-1.31543	0.188367	0.512068
ENSG00000222389	RNU2-28P	RNA, U2 small nuclear 28, pseudogene [Source:HGNC Symbol;Acc:HGNC:48521]	45.0445	-0.115925	0.35419	-0.327297	0.743444	0.936837
ENSG00000222414	RNU2-59P	RNA, U2 small nuclear 59, pseudogene [Source:HGNC Symbol;Acc:HGNC:48552]	38.1628	-0.148524	0.354748	-0.418675	0.675454	0.915049
ENSG00000222427	RNA5SP338	RNA, 5S ribosomal pseudogene 338 [Source:HGNC Symbol;Acc:HGNC:43238]	40.9601	-0.169936	0.434261	-0.391323	0.695559	0.918558
ENSG00000222440	RNU2-26P	RNA, U2 small nuclear 26, pseudogene [Source:HGNC Symbol;Acc:HGNC:48519]	38.6438	0.0958576	0.323536	0.296281	0.767015	0.94271
ENSG00000222477	RNU2-23P	RNA, U2 small nuclear 23, pseudogene [Source:HGNC Symbol;Acc:HGNC:48516]	321.708	-0.103917	0.241642	-0.430046	0.667162	0.912668
ENSG00000222489	SNORA79B	small nucleolar RNA, H/ACA box 79B [Source:HGNC Symbol;Acc:HGNC:52222]	361.964	0.232938	0.226132	1.0301	0.302964	0.671398
ENSG00000222509			48.0935	-0.339571	0.324585	-1.04617	0.295484	0.665547
ENSG00000222529			217.293	-0.733985	0.236609	-3.1021	0.00192155	0.0244481
ENSG00000222601			70.1843	-0.781032	0.301536	-2.59018	0.00959267	0.0788083
ENSG00000222626	RNU2-48P	RNA, U2 small nuclear 48, pseudogene [Source:HGNC Symbol;Acc:HGNC:48541]	41.0626	0.367462	0.329642	1.11473	0.264967	0.623427
ENSG00000222627	RNU2-37P	RNA, U2 small nuclear 37, pseudogene [Source:HGNC Symbol;Acc:HGNC:48530]	25.5205	-0.111903	0.399957	-0.279787	0.779641	0.945104
ENSG00000222640	RNU2-51P	RNA, U2 small nuclear 51, pseudogene [Source:HGNC Symbol;Acc:HGNC:48544]	19.4793	-0.166526	0.445538	-0.373764	0.70858	0.922559
ENSG00000222649			699.904	-0.91985	0.248247	-3.70538	0.000211075	0.00603593
ENSG00000222726	RNU2-7P	RNA, U2 small nuclear 7, pseudogene [Source:HGNC Symbol;Acc:HGNC:42505]	206.654	0.604853	0.220514	2.74293	0.0060894	0.0587983
ENSG00000222733	RNY4P29	RNY4 pseudogene 29 [Source:HGNC Symbol;Acc:HGNC:42497]	68.3269	-0.802469	0.304562	-2.63482	0.00841807	0.0722786
ENSG00000222750	RNU4-46P	RNA, U4 small nuclear 46, pseudogene [Source:HGNC Symbol;Acc:HGNC:46982]	15.3236	-0.0626947	0.498421	-0.125787	0.899901	0.971788
ENSG00000222788	RNU2-38P	RNA, U2 small nuclear 38, pseudogene [Source:HGNC Symbol;Acc:HGNC:48531]	21.8284	-0.0277455	0.412375	-0.0672823	0.946357	0.989954
ENSG00000222806	RNA5SP225	RNA, 5S ribosomal pseudogene 225 [Source:HGNC Symbol;Acc:HGNC:43125]	24.6539	-0.338888	0.415449	-0.815715	0.414663	0.770438
ENSG00000222881			15.07	-1.24807	0.519654	-2.40173	0.0163176	0.117219
ENSG00000222923	RNU2-41P	RNA, U2 small nuclear 41, pseudogene [Source:HGNC Symbol;Acc:HGNC:48534]	33.5399	-0.0858754	0.353241	-0.243107	0.807922	0.945824
ENSG00000222937	SNORD63B	small nucleolar RNA, C/D box 63B [Source:HGNC Symbol;Acc:HGNC:52230]	295.276	0.272425	0.199771	1.36368	0.172668	0.483475
ENSG00000223001	RNU2-61P	RNA, U2 small nuclear 61, pseudogene [Source:HGNC Symbol;Acc:HGNC:48554]	43.7272	0.144365	0.317704	0.454401	0.64954	0.907845
ENSG00000223125	RNU2-32P	RNA, U2 small nuclear 32, pseudogene [Source:HGNC Symbol;Acc:HGNC:48525]	19.8938	-0.469601	0.474571	-0.989527	0.322405	0.689726
ENSG00000223138	RNA5SP450	RNA, 5S ribosomal pseudogene 450 [Source:HGNC Symbol;Acc:HGNC:43350]	17.2897	0.116904	0.464302	0.251785	0.801207	0.945824
ENSG00000223224	SNORD71	small nucleolar RNA, C/D box 71 [Source:HGNC Symbol;Acc:HGNC:32732]	3631.56	0.16421	0.203924	0.805252	0.420674	0.770438
ENSG00000223247	RNU2-64P	RNA, U2 small nuclear 64, pseudogene [Source:HGNC Symbol;Acc:HGNC:48557]	225.639	-0.243753	0.229099	-1.06396	0.287345	0.654915
ENSG00000223336	RNU2-6P	RNA, U2 small nuclear 6, pseudogene [Source:HGNC Symbol;Acc:HGNC:42506]	92.5167	0.0236583	0.244975	0.0965742	0.923065	0.97833
ENSG00000225091	SNORA71A	small nucleolar RNA, H/ACA box 71A [Source:HGNC Symbol;Acc:HGNC:10232]	225.47	0.33684	0.225013	1.49698	0.134399	0.433517
ENSG00000225206	MIR137HG	MIR137 host gene [Source:HGNC Symbol;Acc:HGNC:42871]	242.923	0.143882	0.206605	0.696409	0.486173	0.823265
ENSG00000225630	MTND2P28	MT-ND2 pseudogene 28 [Source:HGNC Symbol;Acc:HGNC:42129]	65.3633	0.481064	0.295361	1.62873	0.10337	0.379534
ENSG00000225697	SLC26A6	solute carrier family 26 member 6 [Source:HGNC Symbol;Acc:HGNC:14472]	26.3435	0.173146	0.432515	0.400323	0.688919	0.916518
ENSG00000225830	ERCC6	ERCC excision repair 6, chromatin remodeling factor [Source:HGNC Symbol;Acc:HGNC:3438]	24.79	-0.144377	0.404247	-0.357151	0.720979	0.928221
ENSG00000225972	MTND1P23	MT-ND1 pseudogene 23 [Source:HGNC Symbol;Acc:HGNC:42092]	26.0844	0.17568	0.394789	0.444997	0.656322	0.909553
ENSG00000226380		novel transcript	16.4255	-0.0591254	0.476775	-0.124011	0.901306	0.97224
ENSG00000226572	SNORD57	small nucleolar RNA, C/D box 57 [Source:HGNC Symbol;Acc:HGNC:10207]	26983.3	0.413111	0.230483	1.79237	0.0730736	0.310458
ENSG00000228253	MT-ATP8	mitochondrially encoded ATP synthase membrane subunit 8 [Source:HGNC Symbol;Acc:HGNC:7415]	64.7437	-0.0852279	0.319363	-0.266868	0.789571	0.945824
ENSG00000228526	MIR34AHG	MIR34A host gene [Source:HGNC Symbol;Acc:HGNC:51913]	272.12	0.767426	0.223352	3.43594	0.000590492	0.0115534
ENSG00000228549		novel transcript	692.347	0.222161	0.193307	1.14926	0.250447	0.600669
ENSG00000229117	RPL41	ribosomal protein L41 [Source:HGNC Symbol;Acc:HGNC:10354]	16.5572	-0.339837	0.464374	-0.731817	0.46428	0.801841
ENSG00000229344	MTCO2P12	MT-CO2 pseudogene 12 [Source:HGNC Symbol;Acc:HGNC:52028]	81.8432	0.258307	0.299856	0.861435	0.388999	0.747395
ENSG00000229604	MTATP8P2	MT-ATP8 pseudogene 2 [Source:HGNC Symbol;Acc:HGNC:44572]	33.4503	0.119546	0.362391	0.329881	0.74149	0.936837
ENSG00000229686	SNORD56	small nucleolar RNA, C/D box 56 [Source:HGNC Symbol;Acc:HGNC:10206]	1681.59	0.325437	0.185949	1.75014	0.0800947	0.329008
ENSG00000229719	MIR194-2HG	MIR194-2 host gene [Source:HGNC Symbol;Acc:HGNC:51946]	154211	0.0997016	0.180083	0.553643	0.579823	0.884305
ENSG00000229807	XIST	X inactive specific transcript [Source:HGNC Symbol;Acc:HGNC:12810]	72.6094	0.594733	0.315891	1.88271	0.0597392	0.274173
ENSG00000230530	LIMD1-AS1	LIMD1 antisense RNA 1 [Source:HGNC Symbol;Acc:HGNC:44107]	151.144	-0.430043	0.221778	-1.93907	0.0524927	0.2498
ENSG00000230590	FTX	FTX transcript, XIST regulator [Source:HGNC Symbol;Acc:HGNC:37190]	6136.24	0.114754	0.163579	0.701522	0.482978	0.820786
ENSG00000231064		novel transcript, antisense to THBS3	1038.7	0.177468	0.172805	1.02698	0.304429	0.672639
ENSG00000231587	SNORD62B	small nucleolar RNA, C/D box 62B [Source:HGNC Symbol;Acc:HGNC:23031]	264.216	-0.207865	0.203196	-1.02298	0.306317	0.673017
ENSG00000232956	SNHG15	small nucleolar RNA host gene 15 [Source:HGNC Symbol;Acc:HGNC:27797]	80.2958	0.227492	0.265505	0.856827	0.39154	0.751252
ENSG00000233016	SNHG7	small nucleolar RNA host gene 7 [Source:HGNC Symbol;Acc:HGNC:28254]	178.937	0.0104012	0.256544	0.0405435	0.96766	0.994141
ENSG00000233237	LINC00472	long intergenic non-protein coding RNA 472 [Source:HGNC Symbol;Acc:HGNC:21380]	1365.83	-0.104248	0.172709	-0.603602	0.546108	0.869446
ENSG00000233421	LINC01783	long intergenic non-protein coding RNA 1783 [Source:HGNC Symbol;Acc:HGNC:52573]	179.255	0.211296	0.212696	0.993418	0.320506	0.689726
ENSG00000234741	GAS5	growth arrest specific 5 [Source:HGNC Symbol;Acc:HGNC:16355]	723126	0.112709	0.175681	0.641555	0.521162	0.855627
ENSG00000234912	SNHG20	small nucleolar RNA host gene 20 [Source:HGNC Symbol;Acc:HGNC:33099]	19.5143	0.635765	0.442017	1.43833	0.150342	0.456783
ENSG00000235284	SNORD62A	small nucleolar RNA, C/D box 62A [Source:HGNC Symbol;Acc:HGNC:10219]	269.834	-0.289197	0.199206	-1.45175	0.146571	0.455945
ENSG00000235408	SNORA71B	small nucleolar RNA, H/ACA box 71B [Source:HGNC Symbol;Acc:HGNC:10233]	93.4581	0.088963	0.245456	0.36244	0.717024	0.926938
ENSG00000236197		novel transcript, antisense to PPP1R9A	33.6976	-0.572416	0.453985	-1.26087	0.207356	0.542849
ENSG00000237170	RPS7P15	ribosomal protein S7 pseudogene 15 [Source:HGNC Symbol;Acc:HGNC:48878]	31.3309	-0.488086	0.362988	-1.34463	0.178744	0.496208
ENSG00000237484	LINC01684	long intergenic non-protein coding RNA 1684 [Source:HGNC Symbol;Acc:HGNC:52472]	13.4972	-0.393334	0.518501	-0.758598	0.448093	0.785748
ENSG00000237973	MTCO1P12	MT-CO1 pseudogene 12 [Source:HGNC Symbol;Acc:HGNC:52014]	213.349	0.517811	0.296509	1.74636	0.0807487	0.329872
ENSG00000238259		PHD finger protein 5A (PHF5A) pseudogene	100.629	0.120747	0.256456	0.470831	0.637761	0.903114
ENSG00000238300	SNORD121B	small nucleolar RNA, C/D box 121B [Source:HGNC Symbol;Acc:HGNC:33569]	228.29	-0.0351652	0.205362	-0.171235	0.864039	0.960055
ENSG00000238317	SNORD11	small nucleolar RNA, C/D box 11 [Source:HGNC Symbol;Acc:HGNC:32707]	145.738	-0.306265	0.245867	-1.24565	0.212892	0.54865
ENSG00000238344	SNORD126	small nucleolar RNA, C/D box 126 [Source:HGNC Symbol;Acc:HGNC:33565]	5322.44	0.330793	0.17201	1.9231	0.0544674	0.256307
ENSG00000238363	SNORA13	small nucleolar RNA, H/ACA box 13 [Source:HGNC Symbol;Acc:HGNC:32601]	14.9902	0.409849	0.475006	0.862831	0.388231	0.747395
ENSG00000238379	RNA5SP103	RNA, 5S ribosomal pseudogene 103 [Source:HGNC Symbol;Acc:HGNC:42901]	20.3748	-0.319094	0.478663	-0.666636	0.505005	0.843755
ENSG00000238423	SNORD42B	small nucleolar RNA, C/D box 42B [Source:HGNC Symbol;Acc:HGNC:10181]	20660.4	0.266417	0.174115	1.53012	0.125987	0.414475
ENSG00000238531	SNORD105B	small nucleolar RNA, C/D box 105B [Source:HGNC Symbol;Acc:HGNC:33572]	7484.95	0.0682284	0.164744	0.414148	0.678766	0.915049
ENSG00000238578	SNORD4A	small nucleolar RNA, C/D box 4A [Source:HGNC Symbol;Acc:HGNC:10097]	901.398	0.042099	0.17659	0.238399	0.811571	0.945824
ENSG00000238597	SNORD4B	small nucleolar RNA, C/D box 4B [Source:HGNC Symbol;Acc:HGNC:10098]	3593.46	0.369266	0.179724	2.05463	0.0399151	0.213502
ENSG00000238622	SNORD97	small nucleolar RNA, C/D box 97 [Source:HGNC Symbol;Acc:HGNC:32760]	55.6124	-0.103779	0.316095	-0.328317	0.742672	0.936837
ENSG00000238649	SNORD42A	small nucleolar RNA, C/D box 42A [Source:HGNC Symbol;Acc:HGNC:10180]	23215.1	0.0885674	0.313013	0.282951	0.777214	0.945104
ENSG00000238650	SNORD54	small nucleolar RNA, C/D box 54 [Source:HGNC Symbol;Acc:HGNC:10204]	316.132	0.362929	0.21439	1.69284	0.0904855	0.35566
ENSG00000238711	RNY4P25	RNY4 pseudogene 25 [Source:HGNC Symbol;Acc:HGNC:42475]	267.461	-0.847843	0.239199	-3.5445	0.000393353	0.00928438
ENSG00000238741	SCARNA7	small Cajal body-specific RNA 7 [Source:HGNC Symbol;Acc:HGNC:32563]	94.8533	0.113371	0.26685	0.424848	0.670948	0.915049
ENSG00000238793	SNORD124	small nucleolar RNA, C/D box 124 [Source:HGNC Symbol;Acc:HGNC:33563]	75.897	-0.440461	0.269839	-1.63231	0.102613	0.378067
ENSG00000238795	SCARNA12	small Cajal body-specific RNA 12 [Source:HGNC Symbol;Acc:HGNC:32569]	99.0327	0.575829	0.249895	2.30429	0.0212066	0.137704
ENSG00000238825	RNVU1-2	RNA, variant U1 small nuclear 2 [Source:HGNC Symbol;Acc:HGNC:48308]	70.0456	-0.0707438	0.302677	-0.233727	0.815197	0.945873
ENSG00000238835	SCARNA18	small Cajal body-specific RNA 18 [Source:HGNC Symbol;Acc:HGNC:32559]	16.4791	-0.735705	0.479784	-1.53341	0.125176	0.413295
ENSG00000238845			72.4432	-1.09401	0.315316	-3.46957	0.000521286	0.0109176
ENSG00000238862	SNORD19B	small nucleolar RNA, C/D box 19B [Source:HGNC Symbol;Acc:HGNC:33570]	441.254	0.344886	0.221336	1.5582	0.119185	0.40463
ENSG00000238886	SNORD121A	small nucleolar RNA, C/D box 121A [Source:HGNC Symbol;Acc:HGNC:33560]	106.837	-0.163612	0.242561	-0.67452	0.499981	0.837242
ENSG00000238917	SNORD10	small nucleolar RNA, C/D box 10 [Source:HGNC Symbol;Acc:HGNC:32706]	2535.82	0.406781	0.170954	2.37948	0.017337	0.119908
ENSG00000238923	RNU7-1	RNA, U7 small nuclear 1 [Source:HGNC Symbol;Acc:HGNC:34033]	90.299	-0.12912	0.251202	-0.514008	0.607246	0.897074
ENSG00000238942	SNORD2	small nucleolar RNA, C/D box 2 [Source:HGNC Symbol;Acc:HGNC:32678]	119229	0.442333	0.167981	2.63323	0.00845762	0.0722786
ENSG00000238961	SNORA47	small nucleolar RNA, H/ACA box 47 [Source:HGNC Symbol;Acc:HGNC:32640]	783.679	0.385166	0.24545	1.56923	0.116595	0.402363
ENSG00000239002	SCARNA10	small Cajal body-specific RNA 10 [Source:HGNC Symbol;Acc:HGNC:32567]	89.0182	-0.106545	0.256718	-0.415027	0.678122	0.915049
ENSG00000239021	RNA5SP246	RNA, 5S ribosomal pseudogene 246 [Source:HGNC Symbol;Acc:HGNC:43146]	29.0916	0.701349	0.424208	1.65331	0.0982675	0.371184
ENSG00000239039	SNORD13	small nucleolar RNA, C/D box 13 [Source:HGNC Symbol;Acc:HGNC:32711]	876.772	-0.238169	0.235318	-1.01212	0.311483	0.678254
ENSG00000239043	SNORD127	small nucleolar RNA, C/D box 127 [Source:HGNC Symbol;Acc:HGNC:33555]	16169.4	0.0440958	0.175671	0.251013	0.801804	0.945824
ENSG00000239057	MIR500B	microRNA 500b [Source:HGNC Symbol;Acc:HGNC:38223]	108.426	-0.335625	0.244445	-1.37301	0.16975	0.479194
ENSG00000239127	SNORD125	small nucleolar RNA, C/D box 125 [Source:HGNC Symbol;Acc:HGNC:33564]	215.54	0.161086	0.204733	0.786811	0.431392	0.77101
ENSG00000239180			81.031	-0.791877	0.261015	-3.03384	0.0024146	0.0280509
ENSG00000239183	SNORA84	small nucleolar RNA, H/ACA box 84 [Source:HGNC Symbol;Acc:HGNC:33615]	33.5941	-0.390091	0.35304	-1.10495	0.269183	0.628391
ENSG00000239195	SNORD5	small nucleolar RNA, C/D box 5 [Source:HGNC Symbol;Acc:HGNC:32702]	5095.26	0.641265	0.202005	3.1745	0.00150096	0.0204763
ENSG00000239306	RBM14	RNA binding motif protein 14 [Source:HGNC Symbol;Acc:HGNC:14219]	16.2036	0.999812	0.472554	2.11576	0.0343651	0.192834
ENSG00000239407		novel transcript	67.9731	-0.18797	0.290318	-0.647461	0.517333	0.850968
ENSG00000239779	WBP1	WW domain binding protein 1 [Source:HGNC Symbol;Acc:HGNC:12737]	25.7475	0.027869	0.395764	0.0704181	0.943861	0.989954
ENSG00000239899	RN7SL674P	RNA, 7SL, cytoplasmic 674, pseudogene [Source:HGNC Symbol;Acc:HGNC:46690]	17.6192	0.423108	0.451431	0.937258	0.348626	0.714058
ENSG00000240409	MTATP8P1	MT-ATP8 pseudogene 1 [Source:HGNC Symbol;Acc:HGNC:44571]	32.6472	0.172339	0.356419	0.483528	0.628721	0.902562
ENSG00000241529	RN7SL767P	RNA, 7SL, cytoplasmic 767, pseudogene [Source:HGNC Symbol;Acc:HGNC:46783]	10.8017	0.160534	0.54535	0.294369	0.768476	0.94271
ENSG00000242125	SNHG3	small nucleolar RNA host gene 3 [Source:HGNC Symbol;Acc:HGNC:10118]	177.424	0.521837	0.231219	2.2569	0.0240143	0.15131
ENSG00000242265	PEG10	paternally expressed 10 [Source:HGNC Symbol;Acc:HGNC:14005]	21.2507	-0.0462076	0.433767	-0.106526	0.915165	0.977505
ENSG00000244486	SCARF2	scavenger receptor class F member 2 [Source:HGNC Symbol;Acc:HGNC:19869]	18.0652	-0.09956	0.443636	-0.224418	0.822432	0.950977
ENSG00000245526	LINC00461	long intergenic non-protein coding RNA 461 [Source:HGNC Symbol;Acc:HGNC:42810]	12.5955	-0.349778	0.539306	-0.64857	0.516616	0.850968
ENSG00000245532	NEAT1	nuclear paraspeckle assembly transcript 1 [Source:HGNC Symbol;Acc:HGNC:30815]	51.5692	0.000339089	0.311132	0.00108986	0.99913	0.999532
ENSG00000245848	CEBPA	CCAAT enhancer binding protein alpha [Source:HGNC Symbol;Acc:HGNC:1833]	17.117	-0.36522	0.450568	-0.810578	0.417608	0.770438
ENSG00000245910	SNHG6	small nucleolar RNA host gene 6 [Source:HGNC Symbol;Acc:HGNC:32965]	11261.7	0.636729	0.177399	3.58925	0.000331634	0.0085024
ENSG00000246350		novel transcript	365.041	0.0368958	0.188412	0.195825	0.844747	0.958264
ENSG00000247092	SNHG10	small nucleolar RNA host gene 10 [Source:HGNC Symbol;Acc:HGNC:27510]	147.952	0.506177	0.221467	2.28556	0.0222798	0.142802
ENSG00000247627	MTND4P12	MT-ND4 pseudogene 12 [Source:HGNC Symbol;Acc:HGNC:42199]	20.2909	0.305445	0.489031	0.624591	0.532239	0.864962
ENSG00000247809	NR2F2-AS1	NR2F2 antisense RNA 1 [Source:HGNC Symbol;Acc:HGNC:44222]	69.0599	0.151327	0.282365	0.535926	0.592009	0.891115
ENSG00000248385	TARM1	T cell-interacting, activating receptor on myeloid cells 1 [Source:HGNC Symbol;Acc:HGNC:37250]	34.6495	-0.532021	0.368132	-1.44519	0.148404	0.455945
ENSG00000248473	LINC01962	long intergenic non-protein coding RNA 1962 [Source:HGNC Symbol;Acc:HGNC:52787]	439.821	0.0013761	0.216775	0.00634809	0.994935	0.998971
ENSG00000248527	MTATP6P1	MT-ATP6 pseudogene 1 [Source:HGNC Symbol;Acc:HGNC:44575]	51.1486	0.140675	0.436674	0.322151	0.747338	0.936837
ENSG00000248643	RBM14-RBM4	RBM14-RBM4 readthrough [Source:HGNC Symbol;Acc:HGNC:38840]	16.2899	0.548801	0.470869	1.16551	0.243814	0.590475
ENSG00000249020	SNORA58	small nucleolar RNA, H/ACA box 58 [Source:HGNC Symbol;Acc:HGNC:32652]	149.103	0.318146	0.241596	1.31685	0.187889	0.511704
ENSG00000249087	ZNF436-AS1	ZNF436 antisense RNA 1 [Source:HGNC Symbol;Acc:HGNC:25122]	219.338	-0.714346	0.211294	-3.38082	0.00072271	0.0126085
ENSG00000249119	MTND6P4	MT-ND6 pseudogene 4 [Source:HGNC Symbol;Acc:HGNC:39467]	25.2483	-0.0946897	0.39363	-0.240555	0.8099	0.945824
ENSG00000249669	CARMN	cardiac mesoderm enhancer-associated non-coding RNA [Source:HGNC Symbol;Acc:HGNC:42872]	225.573	-1.0006	0.344791	-2.90205	0.00370724	0.0397654
ENSG00000249784	SCARNA22	small Cajal body-specific RNA 22 [Source:HGNC Symbol;Acc:HGNC:32580]	230.604	0.0290845	0.264535	0.109946	0.912452	0.977505
ENSG00000249859	PVT1	Pvt1 oncogene [Source:HGNC Symbol;Acc:HGNC:9709]	14.8723	-0.339362	0.507811	-0.668284	0.503952	0.842944
ENSG00000249958	CCT7P2	chaperonin containing TCP1 subunit 7 pseudogene 2 [Source:HGNC Symbol;Acc:HGNC:35134]	13.351	5.06199	0.972289	5.20625	1.92691e-07	1.50806e-05
ENSG00000250722	SELENOP	selenoprotein P [Source:HGNC Symbol;Acc:HGNC:10751]	13.1388	0.206837	0.511788	0.404146	0.686106	0.916518
ENSG00000251562	MALAT1	metastasis associated lung adenocarcinoma transcript 1 [Source:HGNC Symbol;Acc:HGNC:29665]	74.7154	0.141803	0.267739	0.529634	0.596366	0.891252
ENSG00000251705	RNA5-8SP6	RNA, 5.8S ribosomal pseudogene 6 [Source:HGNC Symbol;Acc:HGNC:41960]	1021.23	-0.050931	0.175907	-0.289534	0.772173	0.94271
ENSG00000251718	RNU2-13P	RNA, U2 small nuclear 13, pseudogene [Source:HGNC Symbol;Acc:HGNC:48506]	27.27	-0.128648	0.407225	-0.315914	0.752068	0.936837
ENSG00000251733	SCARNA8	small Cajal body-specific RNA 8 [Source:HGNC Symbol;Acc:HGNC:32564]	18.3419	-0.5583	0.4605	-1.21238	0.225368	0.568921
ENSG00000251791	SCARNA6	small Cajal body-specific RNA 6 [Source:HGNC Symbol;Acc:HGNC:32562]	199.371	-0.0186325	0.221607	-0.0840791	0.932994	0.982439
ENSG00000251811			14.3991	-1.13738	0.513331	-2.21569	0.026713	0.163005
ENSG00000251823	RNA5SP162	RNA, 5S ribosomal pseudogene 162 [Source:HGNC Symbol;Acc:HGNC:43062]	2710.1	-0.0525291	0.223472	-0.235059	0.814163	0.945873
ENSG00000251856	MIR449C	microRNA 449c [Source:HGNC Symbol;Acc:HGNC:37302]	23.6734	-0.232467	0.4062	-0.572298	0.56712	0.882024
ENSG00000251862	MIR1343	microRNA 1343 [Source:HGNC Symbol;Acc:HGNC:41902]	30.9362	-0.664473	0.360654	-1.84241	0.0654152	0.292989
ENSG00000251869	SCARNA23	small Cajal body-specific RNA 23 [Source:HGNC Symbol;Acc:HGNC:32581]	11.0724	0.318458	0.563926	0.564715	0.572267	0.884124
ENSG00000251884	RNA5SP288	RNA, 5S ribosomal pseudogene 288 [Source:HGNC Symbol;Acc:HGNC:43188]	39.6166	-0.106629	0.364323	-0.292678	0.769768	0.94271
ENSG00000251898	SCARNA11	small Cajal body-specific RNA 11 [Source:HGNC Symbol;Acc:HGNC:32568]	72.833	-0.120429	0.268159	-0.449094	0.653364	0.909143
ENSG00000251920	RNA5SP216	RNA, 5S ribosomal pseudogene 216 [Source:HGNC Symbol;Acc:HGNC:43116]	181.703	-0.303449	0.212449	-1.42834	0.153195	0.457969
ENSG00000251986			26.0884	-0.553737	0.403358	-1.37282	0.169809	0.479194
ENSG00000252001	RNA5SP303	RNA, 5S ribosomal pseudogene 303 [Source:HGNC Symbol;Acc:HGNC:43203]	23.323	-0.137442	0.46793	-0.293722	0.76897	0.94271
ENSG00000252010	SCARNA5	small Cajal body-specific RNA 5 [Source:HGNC Symbol;Acc:HGNC:32561]	57.3908	0.163292	0.285718	0.571515	0.567651	0.882024
ENSG00000252012	RNA5SP521	RNA, 5S ribosomal pseudogene 521 [Source:HGNC Symbol;Acc:HGNC:43421]	33.7343	-0.106198	0.394517	-0.269186	0.787787	0.945824
ENSG00000252018	RNU2-30P	RNA, U2 small nuclear 30, pseudogene [Source:HGNC Symbol;Acc:HGNC:48523]	113.165	-0.132874	0.249661	-0.532216	0.594576	0.891115
ENSG00000252139			26.3388	0.205282	0.421629	0.486879	0.626344	0.902562
ENSG00000252153	MIR2278	microRNA 2278 [Source:HGNC Symbol;Acc:HGNC:37315]	15.0243	-0.855367	0.503975	-1.69724	0.0896511	0.35566
ENSG00000252171			23.9603	-0.716905	0.411089	-1.74392	0.0811737	0.330699
ENSG00000252213	SNORA74D	small nucleolar RNA, H/ACA box 74D [Source:HGNC Symbol;Acc:HGNC:52219]	75.8556	0.0752566	0.267071	0.281784	0.778109	0.945104
ENSG00000252217			20.5218	-0.437402	0.418416	-1.04538	0.295848	0.665547
ENSG00000252244	RNU7-3P	RNA, U7 small nuclear 3 pseudogene [Source:HGNC Symbol;Acc:HGNC:34099]	13.0282	-0.53503	0.514867	-1.03916	0.298729	0.666464
ENSG00000252316	RNY4	RNA, Ro60-associated Y4 [Source:HGNC Symbol;Acc:HGNC:10244]	13976.5	-0.598763	0.180506	-3.31713	0.000909475	0.0146716
ENSG00000252317			161.542	-1.08456	0.229994	-4.71561	2.40986e-06	0.000143339
ENSG00000252337			22.0564	0.834129	0.4394	1.89834	0.0576516	0.266236
ENSG00000252468	RNU2-57P	RNA, U2 small nuclear 57, pseudogene [Source:HGNC Symbol;Acc:HGNC:48550]	47.4071	0.570319	0.320511	1.77941	0.0751734	0.316665
ENSG00000252481	SCARNA13	small Cajal body-specific RNA 13 [Source:HGNC Symbol;Acc:HGNC:32570]	134.426	0.542352	0.226884	2.39043	0.0168285	0.119162
ENSG00000252487	RNY4P20	RNY4 pseudogene 20 [Source:HGNC Symbol;Acc:HGNC:34070]	139.571	-0.486178	0.356771	-1.36272	0.172972	0.483475
ENSG00000252542	SNORD36C	small nucleolar RNA, C/D box 36C [Source:HGNC Symbol;Acc:HGNC:10165]	4145	-0.068932	0.214431	-0.321464	0.747858	0.936837
ENSG00000252577	SCARNA20	small Cajal body-specific RNA 20 [Source:HGNC Symbol;Acc:HGNC:32578]	510.461	0.342614	0.201281	1.70217	0.0887239	0.353706
ENSG00000252598	RNA5SP460	RNA, 5S ribosomal pseudogene 460 [Source:HGNC Symbol;Acc:HGNC:43360]	17.0432	-0.0621175	0.449284	-0.138259	0.890036	0.968166
ENSG00000252623	RNA5SP481	RNA, 5S ribosomal pseudogene 481 [Source:HGNC Symbol;Acc:HGNC:43381]	413.284	-0.237152	0.223668	-1.06029	0.289014	0.655127
ENSG00000252652			219.554	-0.709477	0.23451	-3.02536	0.00248336	0.0286261
ENSG00000252690		TEC	3856.18	-0.250339	0.275179	-0.909733	0.362964	0.726009
ENSG00000252699	SNORA21B	small nucleolar RNA, H/ACA box 21B [Source:HGNC Symbol;Acc:HGNC:52195]	16.554	0.0106769	0.464542	0.0229836	0.981663	0.994141
ENSG00000252712	SCARNA14	small Cajal body-specific RNA 14 [Source:HGNC Symbol;Acc:HGNC:32571]	234.925	-0.662036	0.220292	-3.00526	0.00265355	0.0303525
ENSG00000252759			99.2691	-0.892724	0.312279	-2.85874	0.00425333	0.0445401
ENSG00000252787			5647.55	0.437032	0.25848	1.69078	0.0908792	0.35566
ENSG00000252847	RNU2-46P	RNA, U2 small nuclear 46, pseudogene [Source:HGNC Symbol;Acc:HGNC:48539]	62.8566	-0.346417	0.314026	-1.10315	0.269964	0.628391
ENSG00000252850	RNU1-117P	RNA, U1 small nuclear 117, pseudogene [Source:HGNC Symbol;Acc:HGNC:48459]	50.025	-0.152359	0.31433	-0.484712	0.627881	0.902562
ENSG00000252866	RNA5SP243	RNA, 5S ribosomal pseudogene 243 [Source:HGNC Symbol;Acc:HGNC:43143]	94.9074	-0.00775814	0.271976	-0.0285251	0.977243	0.994141
ENSG00000252906	SCARNA3	small Cajal body-specific RNA 3 [Source:HGNC Symbol;Acc:HGNC:32577]	190.931	-0.265475	0.219143	-1.21143	0.225732	0.568921
ENSG00000252947	SCARNA1	small Cajal body-specific RNA 1 [Source:HGNC Symbol;Acc:HGNC:32555]	36.9421	0.046839	0.439806	0.106499	0.915186	0.977505
ENSG00000253007	SNORA50B	small nucleolar RNA, H/ACA box 50B [Source:HGNC Symbol;Acc:HGNC:50432]	55.1439	0.0468146	0.354612	0.132016	0.894972	0.970695
ENSG00000253008	MIR2355	microRNA 2355 [Source:HGNC Symbol;Acc:HGNC:38328]	18.8285	-0.646389	0.45911	-1.40792	0.159155	0.466581
ENSG00000253030	MIR2116	microRNA 2116 [Source:HGNC Symbol;Acc:HGNC:37310]	15.117	0.0252456	0.49014	0.0515069	0.958922	0.994141
ENSG00000253051			64.7594	1.01024	0.306191	3.2994	0.000968934	0.0150084
ENSG00000253094			10.8	0.205459	0.604132	0.34009	0.733789	0.936837
ENSG00000253097	RNU2-19P	RNA, U2 small nuclear 19, pseudogene [Source:HGNC Symbol;Acc:HGNC:48512]	13.9652	-0.050766	0.500565	-0.101417	0.919219	0.977505
ENSG00000253190		novel transcript	289.438	0.394066	0.213153	1.84875	0.0644939	0.291876
ENSG00000253522	MIR3142HG	MIR3142 host gene [Source:HGNC Symbol;Acc:HGNC:51944]	5015.24	-0.547927	0.269788	-2.03095	0.0422596	0.222837
ENSG00000253719	ATXN7L3B	ataxin 7 like 3B [Source:HGNC Symbol;Acc:HGNC:37931]	11.4429	0.925571	0.576836	1.60457	0.10859	0.391924
ENSG00000253729	PRKDC	protein kinase, DNA-activated, catalytic subunit [Source:HGNC Symbol;Acc:HGNC:9413]	16.5767	0.256243	0.46105	0.555782	0.57836	0.884305
ENSG00000254132	MTND6P3	MT-ND6 pseudogene 3 [Source:HGNC Symbol;Acc:HGNC:39466]	368.44	0.147105	0.244551	0.60153	0.547487	0.86975
ENSG00000254324	MIR151A	microRNA 151a [Source:HGNC Symbol;Acc:HGNC:31762]	18006	-0.0965549	0.190334	-0.507291	0.61195	0.897074
ENSG00000254341	SNORD87	small nucleolar RNA, C/D box 87 [Source:HGNC Symbol;Acc:HGNC:32746]	11260	0.636812	0.177357	3.59057	0.000329958	0.0085024
ENSG00000254772	EEF1G	eukaryotic translation elongation factor 1 gamma [Source:HGNC Symbol;Acc:HGNC:3213]	16.8265	-0.618976	0.467322	-1.32452	0.185331	0.506594
ENSG00000254911	SCARNA9	small Cajal body-specific RNA 9 [Source:HGNC Symbol;Acc:HGNC:32566]	2196.93	0.169466	0.204808	0.827441	0.407987	0.765171
ENSG00000255008	LINC02739	long intergenic non-protein coding RNA 2739 [Source:HGNC Symbol;Acc:HGNC:54256]	1581.28	0.164928	0.191469	0.861382	0.389028	0.747395
ENSG00000255508		novel protein	18.2371	-0.683348	0.459196	-1.48814	0.136714	0.433897
ENSG00000255571	MIR9-3HG	MIR9-3 host gene [Source:HGNC Symbol;Acc:HGNC:27388]	45.8941	-0.630915	0.358981	-1.75752	0.0788298	0.324709
ENSG00000255717	SNHG1	small nucleolar RNA host gene 1 [Source:HGNC Symbol;Acc:HGNC:32688]	711155	0.476102	0.203494	2.33964	0.0193023	0.128711
ENSG00000255823	MTRNR2L8	MT-RNR2 like 8 [Source:HGNC Symbol;Acc:HGNC:37165]	254.358	0.0538407	0.215756	0.249545	0.80294	0.945824
ENSG00000256618	MTRNR2L1	MT-RNR2 like 1 [Source:HGNC Symbol;Acc:HGNC:37155]	188.614	-0.0486508	0.243305	-0.199959	0.841513	0.958264
ENSG00000257178		novel transcript, sense intronic to HOXB3	24.8168	-3.65931	0.598065	-6.11858	9.44151e-10	1.16996e-07
ENSG00000258498	DIO3OS	DIO3 opposite strand upstream RNA [Source:HGNC Symbol;Acc:HGNC:20348]	16.8003	-1.21508	0.524321	-2.31744	0.02048	0.134158
ENSG00000259001		ribonuclease P RNA component H1	598.553	0.0816366	0.183454	0.444998	0.656321	0.909553
ENSG00000259417	CTXND1	cortexin domain containing 1 [Source:HGNC Symbol;Acc:HGNC:50507]	47.8625	-0.662322	0.304338	-2.17627	0.029535	0.175429
ENSG00000259932		novel transcript	1279.82	-0.0518952	0.185163	-0.280268	0.779272	0.945104
ENSG00000260035		novel transcript	1010.52	0.0156547	0.185426	0.0844258	0.932718	0.982439
ENSG00000260220	CCDC187	coiled-coil domain containing 187 [Source:HGNC Symbol;Acc:HGNC:30942]	1000.68	-0.0532543	0.200021	-0.266243	0.790052	0.945824
ENSG00000260464		novel transcript	284.381	-0.147189	0.199963	-0.736081	0.461681	0.800057
ENSG00000260916	CCPG1	cell cycle progression 1 [Source:HGNC Symbol;Acc:HGNC:24227]	12.3173	-0.634859	0.542141	-1.17102	0.24159	0.587961
ENSG00000261441		novel transcript, antisense to POLG	415.179	0.298894	0.188908	1.58222	0.113598	0.401251
ENSG00000261519		novel transcript	283.454	-1.04085	0.253416	-4.10728	4.00348e-05	0.00156593
ENSG00000261889		novel transcript	172.201	0.638837	0.229124	2.78817	0.00530072	0.0532579
ENSG00000262074	SNORD3B-2	small nucleolar RNA, C/D box 3B-2 [Source:HGNC Symbol;Acc:HGNC:33190]	178.861	-0.2016	0.223608	-0.901581	0.36728	0.727223
ENSG00000262202		novel transcript	143.862	-0.0514763	0.240231	-0.214279	0.83033	0.95348
ENSG00000263414	MIR3187	microRNA 3187 [Source:HGNC Symbol;Acc:HGNC:38319]	62.0105	-0.668829	0.298328	-2.24192	0.0249665	0.155988
ENSG00000263436	MIR3158-1	microRNA 3158-1 [Source:HGNC Symbol;Acc:HGNC:38196]	269.83	1.45042	0.204218	7.10232	1.22679e-12	4.5606e-10
ENSG00000263468	MIR3130-2	microRNA 3130-2 [Source:HGNC Symbol;Acc:HGNC:38363]	10.6938	0.256098	0.574815	0.445532	0.655936	0.909553
ENSG00000263514	MIR3668	microRNA 3668 [Source:HGNC Symbol;Acc:HGNC:38982]	10.6986	-0.0574342	0.555717	-0.103351	0.917684	0.977505
ENSG00000263581	MIR548X2	microRNA 548x-2 [Source:HGNC Symbol;Acc:HGNC:41734]	15.3278	-3.88536	0.766943	-5.06603	4.06204e-07	3.02012e-05
ENSG00000263631	MIR378D1	microRNA 378d-1 [Source:HGNC Symbol;Acc:HGNC:41550]	13.1349	-0.409812	0.515471	-0.795023	0.4266	0.77101
ENSG00000263642	MIR4802	microRNA 4802 [Source:HGNC Symbol;Acc:HGNC:41658]	12.7437	-0.470137	0.538548	-0.872972	0.382678	0.743741
ENSG00000263740	RN7SL4P	RNA, 7SL, cytoplasmic 4, pseudogene [Source:HGNC Symbol;Acc:HGNC:10039]	20.1831	0.592624	0.425365	1.39321	0.163555	0.469604
ENSG00000263744	MIR3664	microRNA 3664 [Source:HGNC Symbol;Acc:HGNC:38899]	79.3465	0.233425	0.294501	0.792612	0.428004	0.77101
ENSG00000263764	SNORD43	small nucleolar RNA, C/D box 43 [Source:HGNC Symbol;Acc:HGNC:10182]	51816.8	0.20738	0.188963	1.09746	0.272439	0.632007
ENSG00000263790	MIR4473	microRNA 4473 [Source:HGNC Symbol;Acc:HGNC:41540]	63.7316	0.0625659	0.370202	0.169005	0.865793	0.960055
ENSG00000263795	MIR5100	microRNA 5100 [Source:HGNC Symbol;Acc:HGNC:43540]	16.3696	0.77947	0.473147	1.64742	0.0994725	0.371496
ENSG00000263813	MIR3679	microRNA 3679 [Source:HGNC Symbol;Acc:HGNC:38979]	19.6452	-1.79699	0.500322	-3.59168	0.000328555	0.0085024
ENSG00000263909	MIR5000	microRNA 5000 [Source:HGNC Symbol;Acc:HGNC:43464]	17.9529	-0.880732	0.46168	-1.90767	0.0564343	0.263892
ENSG00000263934	SNORD3A	small nucleolar RNA, C/D box 3A [Source:HGNC Symbol;Acc:HGNC:33189]	1074.72	0.00614428	0.18717	0.0328272	0.973812	0.994141
ENSG00000264141	MIR3928	microRNA 3928 [Source:HGNC Symbol;Acc:HGNC:38933]	46.78	-0.532394	0.314717	-1.69166	0.0907106	0.35566
ENSG00000264157	MIR3127	microRNA 3127 [Source:HGNC Symbol;Acc:HGNC:38269]	10.4578	-1.16635	0.583952	-1.99734	0.0457886	0.234229
ENSG00000264160	MIR4762	microRNA 4762 [Source:HGNC Symbol;Acc:HGNC:41603]	12.6679	-0.459322	0.531251	-0.864604	0.387256	0.747395
ENSG00000264226	MIR3168	microRNA 3168 [Source:HGNC Symbol;Acc:HGNC:38249]	16.0421	-0.81893	0.486155	-1.6845	0.0920841	0.35566
ENSG00000264229	RNU4ATAC	RNA, U4atac small nuclear (U12-dependent splicing) [Source:HGNC Symbol;Acc:HGNC:34016]	18.4641	0.25796	0.457076	0.564369	0.572503	0.884124
ENSG00000264279	MIR4786	microRNA 4786 [Source:HGNC Symbol;Acc:HGNC:41751]	11.3523	0.454433	0.565814	0.803149	0.421889	0.770438
ENSG00000264294	SNORD55	small nucleolar RNA, C/D box 55 [Source:HGNC Symbol;Acc:HGNC:10205]	15280.5	0.348511	0.240499	1.44912	0.147305	0.455945
ENSG00000264342	MIR3660	microRNA 3660 [Source:HGNC Symbol;Acc:HGNC:38985]	28.2486	0.631335	0.88758	0.711299	0.476899	0.817217
ENSG00000264346	SNORA77B	small nucleolar RNA, H/ACA box 77B [Source:HGNC Symbol;Acc:HGNC:52221]	168.85	-0.165601	0.225223	-0.735276	0.462171	0.800057
ENSG00000264448	MIR378D2HG	MIR378D2 host gene [Source:HGNC Symbol;Acc:HGNC:54166]	12.1493	-0.0410815	0.585986	-0.0701066	0.944109	0.989954
ENSG00000264539	MIR548AR	microRNA 548ar [Source:HGNC Symbol;Acc:HGNC:43455]	33.4485	-0.243627	0.353947	-0.688317	0.491253	0.830106
ENSG00000264549	SNORD95	small nucleolar RNA, C/D box 95 [Source:HGNC Symbol;Acc:HGNC:32757]	4359.91	0.20416	0.171384	1.19124	0.233559	0.578837
ENSG00000264574			12.0764	0.6132	0.53331	1.1498	0.250226	0.600669
ENSG00000264607	MIR3173	microRNA 3173 [Source:HGNC Symbol;Acc:HGNC:38174]	13.7362	-0.0496847	0.496658	-0.100038	0.920314	0.977505
ENSG00000264616	MIR4755	microRNA 4755 [Source:HGNC Symbol;Acc:HGNC:41815]	17.3124	0.680159	0.483768	1.40596	0.159735	0.466581
ENSG00000264623	MIR4796	microRNA 4796 [Source:HGNC Symbol;Acc:HGNC:41779]	76.8763	-0.245163	0.277589	-0.883188	0.377135	0.738815
ENSG00000264657	MIR3171	microRNA 3171 [Source:HGNC Symbol;Acc:HGNC:38216]	26.2897	0.514837	0.487573	1.05592	0.291005	0.657636
ENSG00000264712	MIR4504	microRNA 4504 [Source:HGNC Symbol;Acc:HGNC:41624]	11.4728	-0.563552	0.568022	-0.99213	0.321134	0.689726
ENSG00000264725	MIR3129	microRNA 3129 [Source:HGNC Symbol;Acc:HGNC:38217]	78.6807	-0.138981	0.26141	-0.531657	0.594963	0.891115
ENSG00000264737	MIR4511	microRNA 4511 [Source:HGNC Symbol;Acc:HGNC:41589]	11.925	1.01457	0.557212	1.8208	0.0686376	0.300189
ENSG00000264772		novel transcript	39.886	-0.106583	0.354758	-0.300437	0.763844	0.94271
ENSG00000264788	MIR3148	microRNA 3148 [Source:HGNC Symbol;Acc:HGNC:38215]	13.4444	1.70501	0.529458	3.2203	0.00128057	0.0181352
ENSG00000264803	MIR378C	microRNA 378c [Source:HGNC Symbol;Acc:HGNC:38374]	59.3031	0.445816	0.416755	1.06973	0.28474	0.651941
ENSG00000264857	MIR5696	microRNA 5696 [Source:HGNC Symbol;Acc:HGNC:43516]	11.6894	0.378346	0.556937	0.679334	0.496926	0.834948
ENSG00000264940	SNORD3C	small nucleolar RNA, C/D box 3C [Source:HGNC Symbol;Acc:HGNC:33191]	237.05	0.122977	0.209108	0.588104	0.556462	0.87101
ENSG00000264994	SNORD92	small nucleolar RNA, C/D box 92 [Source:HGNC Symbol;Acc:HGNC:32754]	268.691	0.215055	0.20714	1.03821	0.299171	0.666464
ENSG00000265083	MIR3691	microRNA 3691 [Source:HGNC Symbol;Acc:HGNC:38909]	19.0058	-0.674533	0.447524	-1.50726	0.131745	0.426808
ENSG00000265102	MIR3942	microRNA 3942 [Source:HGNC Symbol;Acc:HGNC:38976]	15.121	0.47149	0.47988	0.982517	0.325845	0.689726
ENSG00000265134	MIR3190	microRNA 3190 [Source:HGNC Symbol;Acc:HGNC:38190]	12.482	-0.0686571	0.526582	-0.130383	0.896264	0.971112
ENSG00000265135	MIR5687	microRNA 5687 [Source:HGNC Symbol;Acc:HGNC:43457]	13.0939	-0.392326	0.511816	-0.766537	0.443357	0.78474
ENSG00000265145	SNORD53	small nucleolar RNA, C/D box 53 [Source:HGNC Symbol;Acc:HGNC:10203]	135.103	0.574926	0.226253	2.54107	0.0110513	0.0886205
ENSG00000265185	SNORD3B-1	small nucleolar RNA, C/D box 3B-1 [Source:HGNC Symbol;Acc:HGNC:10168]	611.187	-0.0272671	0.193252	-0.141096	0.887794	0.968166
ENSG00000265201	MIR4677	microRNA 4677 [Source:HGNC Symbol;Acc:HGNC:41844]	157.385	0.338596	0.237241	1.42723	0.153515	0.457969
ENSG00000265227	MIR4699	microRNA 4699 [Source:HGNC Symbol;Acc:HGNC:41636]	34.5323	0.993531	0.355639	2.79365	0.00521166	0.0527193
ENSG00000265236	SNORD84	small nucleolar RNA, C/D box 84 [Source:HGNC Symbol;Acc:HGNC:32743]	267.667	-0.0527929	0.198949	-0.265359	0.790733	0.945824
ENSG00000265396	MIR3128	microRNA 3128 [Source:HGNC Symbol;Acc:HGNC:38188]	81.471	0.474101	0.272936	1.73704	0.0823792	0.333782
ENSG00000265423	MIR4652	microRNA 4652 [Source:HGNC Symbol;Acc:HGNC:41615]	79.4339	0.462337	0.303885	1.52142	0.128155	0.419749
ENSG00000265503	MIR1269B	microRNA 1269b [Source:HGNC Symbol;Acc:HGNC:41787]	5015.35	0.549855	0.201527	2.72844	0.00636347	0.0610482
ENSG00000265660	MIR4664	microRNA 4664 [Source:HGNC Symbol;Acc:HGNC:41777]	24.715	-0.57978	0.40436	-1.43382	0.151623	0.457969
ENSG00000265681	RPL17	ribosomal protein L17 [Source:HGNC Symbol;Acc:HGNC:10307]	53300.4	0.279335	0.165588	1.68692	0.0916181	0.35566
ENSG00000265706	SNORD53B	small nucleolar RNA, C/D box 53B [Source:HGNC Symbol;Acc:HGNC:52229]	982.952	0.387601	0.192277	2.01585	0.043816	0.229141
ENSG00000265725	MIR3144	microRNA 3144 [Source:HGNC Symbol;Acc:HGNC:38331]	110.206	0.0993359	0.245454	0.404703	0.685696	0.916518
ENSG00000265735	RN7SL5P	RNA, 7SL, cytoplasmic 5, pseudogene [Source:HGNC Symbol;Acc:HGNC:10040]	24.1913	0.61491	0.39271	1.56581	0.117392	0.403147
ENSG00000265820	MIR3177	microRNA 3177 [Source:HGNC Symbol;Acc:HGNC:38364]	22.9777	-0.855559	0.42604	-2.00817	0.0446257	0.230411
ENSG00000265841	MIR548X	microRNA 548x [Source:HGNC Symbol;Acc:HGNC:38248]	231.636	-3.63517	0.258842	-14.044	8.38816e-45	6.2366e-42
ENSG00000265871	MIR3174	microRNA 3174 [Source:HGNC Symbol;Acc:HGNC:38264]	11.3256	-0.274371	0.541878	-0.506334	0.612622	0.897074
ENSG00000265961			10.7795	-1.46564	0.612938	-2.39116	0.0167951	0.119162
ENSG00000266019	MIR3609	microRNA 3609 [Source:HGNC Symbol;Acc:HGNC:38956]	24.2416	0.284034	0.419881	0.676463	0.498747	0.836637
ENSG00000266038	MIR4659A	microRNA 4659a [Source:HGNC Symbol;Acc:HGNC:41857]	15.6431	0.791312	0.497629	1.59016	0.111798	0.39913
ENSG00000266086		novel transcript	11.9826	0.4632	0.541536	0.855344	0.39236	0.751856
ENSG00000266104	MIR4326	microRNA 4326 [Source:HGNC Symbol;Acc:HGNC:38314]	513.223	-0.49171	0.189149	-2.59959	0.00933353	0.0771053
ENSG00000266179		LSU rRNA pseudogene	26.2123	0.794916	0.518346	1.53356	0.125137	0.413295
ENSG00000266194	MIR4661	microRNA 4661 [Source:HGNC Symbol;Acc:HGNC:41582]	162.4	0.748017	0.237605	3.14816	0.00164304	0.0220108
ENSG00000266297	MIR744	microRNA 744 [Source:HGNC Symbol;Acc:HGNC:33658]	1597.79	-0.518514	0.206044	-2.51652	0.0118519	0.0932475
ENSG00000266320	MIR3909	microRNA 3909 [Source:HGNC Symbol;Acc:HGNC:38987]	318.213	-0.47244	0.201441	-2.34531	0.0190113	0.127342
ENSG00000266402	SNHG25	small nucleolar RNA host gene 25 [Source:HGNC Symbol;Acc:HGNC:51534]	89.5033	0.938134	0.265851	3.52879	0.000417459	0.00948761
ENSG00000266407	MIR3157	microRNA 3157 [Source:HGNC Symbol;Acc:HGNC:38172]	11.6098	0.525868	0.540573	0.972798	0.330654	0.6958
ENSG00000266423	MIR3163	microRNA 3163 [Source:HGNC Symbol;Acc:HGNC:38209]	39.9294	1.35425	0.393074	3.44529	0.000570449	0.0114629
ENSG00000266437	MIR4746	microRNA 4746 [Source:HGNC Symbol;Acc:HGNC:41904]	197.676	-0.754318	0.231049	-3.26476	0.00109558	0.0162913
ENSG00000266593	MIR4713	microRNA 4713 [Source:HGNC Symbol;Acc:HGNC:41899]	22.8576	0.00646902	0.409483	0.015798	0.987396	0.996374
ENSG00000266719	MIR4676	microRNA 4676 [Source:HGNC Symbol;Acc:HGNC:41691]	14.9619	1.62821	0.534101	3.0485	0.00229984	0.0271417
ENSG00000266751	MIR3661	microRNA 3661 [Source:HGNC Symbol;Acc:HGNC:38892]	11.3102	-0.862254	0.584231	-1.47588	0.139976	0.440052
ENSG00000267200	MIR132	microRNA 132 [Source:HGNC Symbol;Acc:HGNC:31516]	10.5663	0.237806	0.555655	0.427974	0.66867	0.913686
ENSG00000267321	SNHG30	small nucleolar RNA host gene 30 [Source:HGNC Symbol;Acc:HGNC:52836]	213.247	-0.390202	0.212593	-1.83545	0.0664395	0.294035
ENSG00000267322	SNHG22	small nucleolar RNA host gene 22 [Source:HGNC Symbol;Acc:HGNC:50285]	27.8584	0.287645	0.421894	0.681795	0.495368	0.834216
ENSG00000267391	MIR122HG	MIR122 host gene [Source:HGNC Symbol;Acc:HGNC:53821]	269078	0.325658	0.226514	1.4377	0.15052	0.456783
ENSG00000267519		novel transcript	5872.89	-0.0363724	0.18205	-0.199793	0.841642	0.958264
ENSG00000267532	MIR497HG	mir-497-195 cluster host gene [Source:HGNC Symbol;Acc:HGNC:39523]	26.2554	1.11425	0.381369	2.92171	0.00348114	0.0377843
ENSG00000268379		pentatricopeptide repeat domain 3 pseudogene	336.098	-0.128555	0.215987	-0.595199	0.55171	0.869763
ENSG00000268649		novel transcript	521.391	-0.97395	0.184236	-5.28642	1.24731e-07	1.03042e-05
ENSG00000269028	MTRNR2L12	MT-RNR2 like 12 [Source:HGNC Symbol;Acc:HGNC:37169]	73.9992	0.179018	0.376139	0.475936	0.63412	0.903114
ENSG00000269893	SNHG8	small nucleolar RNA host gene 8 [Source:HGNC Symbol;Acc:HGNC:33098]	89.0697	0.457746	0.288005	1.58937	0.111977	0.39913
ENSG00000269900	RMRP	RNA component of mitochondrial RNA processing endoribonuclease [Source:HGNC Symbol;Acc:HGNC:10031]	2821.73	0.114693	0.185228	0.619201	0.535784	0.865907
ENSG00000269929	MIRLET7A1HG	miRlet-7a-1/let-7f-1/let-7d cluster host gene [Source:HGNC Symbol;Acc:HGNC:53970]	3305.66	-0.138056	0.224717	-0.614355	0.53898	0.865907
ENSG00000270022		RNA, U12 small nuclear	330.067	0.299797	0.1884	1.59128	0.111547	0.39913
ENSG00000270066		small Cajal body-specific RNA 2	248.501	0.477176	0.203161	2.34876	0.0188362	0.126739
ENSG00000270103		RNA, U11 small nuclear	264.532	-0.0397926	0.222239	-0.179053	0.857896	0.959481
ENSG00000270123	VTRNA2-1	vault RNA 2-1 [Source:HGNC Symbol;Acc:HGNC:37054]	1116.95	0.292614	0.193928	1.50888	0.131331	0.426395
ENSG00000270276	H4C15	H4 clustered histone 15 [Source:HGNC Symbol;Acc:HGNC:29607]	10.7128	-1.73502	0.628891	-2.75886	0.00580026	0.0566325
ENSG00000270672	MTRNR2L6	MT-RNR2 like 6 [Source:HGNC Symbol;Acc:HGNC:37163]	24.326	0.747081	0.443915	1.68294	0.0923874	0.355907
ENSG00000270722	RNVU1-31	RNA, variant U1 small nuclear 31 [Source:HGNC Symbol;Acc:HGNC:54448]	180.827	-0.317992	0.243981	-1.30335	0.192456	0.517779
ENSG00000270882	H4C14	H4 clustered histone 14 [Source:HGNC Symbol;Acc:HGNC:4794]	38.817	-1.01939	0.342974	-2.97222	0.00295656	0.0330557
ENSG00000271551		novel transcript, antisense to ARID1B	23.8075	-1.03561	0.425335	-2.4348	0.0148999	0.109143
ENSG00000271798	SNORA51	small nucleolar RNA, H/ACA box 51 [Source:HGNC Symbol;Acc:HGNC:32644]	96.3958	0.374649	0.251206	1.4914	0.135855	0.433897
ENSG00000271852	SNORD11B	small nucleolar RNA, C/D box 11B [Source:HGNC Symbol;Acc:HGNC:33571]	25.6786	-0.0255876	0.377261	-0.0678248	0.945925	0.989954
ENSG00000271982	SNORD58B	small nucleolar RNA, C/D box 58B [Source:HGNC Symbol;Acc:HGNC:10209]	16570.5	0.296571	0.162479	1.82529	0.0679576	0.29986
ENSG00000272031	ANKRD34A	ankyrin repeat domain 34A [Source:HGNC Symbol;Acc:HGNC:27639]	11.2537	0.0336659	0.57351	0.0587015	0.95319	0.993268
ENSG00000272034	SNORD14A	small nucleolar RNA, C/D box 14A [Source:HGNC Symbol;Acc:HGNC:10113]	299.244	0.164839	0.214957	0.766846	0.443173	0.78474
ENSG00000272055	RNU6-6P	RNA, U6 small nuclear 6, pseudogene [Source:HGNC Symbol;Acc:HGNC:10228]	11.3451	-0.23826	0.557549	-0.427335	0.669135	0.913686
ENSG00000272080	MIR502	microRNA 502 [Source:HGNC Symbol;Acc:HGNC:32136]	369.159	-0.0545604	0.200823	-0.271684	0.785865	0.945824
ENSG00000272196	H2AC19	H2A clustered histone 19 [Source:HGNC Symbol;Acc:HGNC:29668]	56.1694	-0.625804	0.28741	-2.17739	0.0294513	0.175429
ENSG00000272296	SNORD96A	small nucleolar RNA, C/D box 96A [Source:HGNC Symbol;Acc:HGNC:32758]	3100.4	0.143218	0.178263	0.803404	0.421741	0.770438
ENSG00000272351	RNA5SP506	RNA, 5S ribosomal pseudogene 506 [Source:HGNC Symbol;Acc:HGNC:43406]	6894.5	-0.122461	0.230783	-0.530631	0.595674	0.891115
ENSG00000272435	RNA5SP357	RNA, 5S ribosomal pseudogene 357 [Source:HGNC Symbol;Acc:HGNC:43257]	5672.26	-0.119438	0.235616	-0.506918	0.612212	0.897074
ENSG00000272533	SNORA28	small nucleolar RNA, H/ACA box 28 [Source:HGNC Symbol;Acc:HGNC:32618]	25.3296	-0.534078	0.38559	-1.38509	0.166024	0.472945
ENSG00000273247		novel transcript, antisense to RAB33B	31.742	-0.0391542	0.367508	-0.10654	0.915154	0.977505
ENSG00000273544	SNORA44	small nucleolar RNA, H/ACA box 44 [Source:HGNC Symbol;Acc:HGNC:32637]	337.639	0.498067	0.200651	2.48225	0.0130554	0.0985452
ENSG00000273694			205.772	-0.202337	0.22037	-0.918168	0.358531	0.723112
ENSG00000273709			837.258	0.0488851	0.197187	0.247913	0.804202	0.945824
ENSG00000273734		novel protein, readthrough between OAZ1 and SPPL2B	164.191	-0.0738842	0.233941	-0.315824	0.752136	0.936837
ENSG00000273768	RNVU1-29	RNA, variant U1 small nuclear 29 [Source:HGNC Symbol;Acc:HGNC:54433]	1697.66	-0.14045	0.174357	-0.805529	0.420514	0.770438
ENSG00000273802	H2BC8	H2B clustered histone 8 [Source:HGNC Symbol;Acc:HGNC:4746]	15.9757	-0.218566	0.543993	-0.401781	0.687845	0.916518
ENSG00000273836	MIR6842	microRNA 6842 [Source:HGNC Symbol;Acc:HGNC:50254]	35.8317	-0.0764527	0.347494	-0.220011	0.825862	0.951982
ENSG00000273885			336.793	0.0735078	0.195247	0.376486	0.706555	0.922559
ENSG00000274012	RN7SL2	RNA component of signal recognition particle 7SL2 [Source:HGNC Symbol;Acc:HGNC:23134]	53.6979	0.574191	0.295849	1.94083	0.0522795	0.2498
ENSG00000274060	MIR6724-2	microRNA 6724-2 [Source:HGNC Symbol;Acc:HGNC:50832]	15.2175	0.645109	0.477109	1.35212	0.176337	0.491035
ENSG00000274062			816.741	0.0946375	0.193885	0.488112	0.625471	0.902562
ENSG00000274091	SNORD1C	small nucleolar RNA, C/D box 1C [Source:HGNC Symbol;Acc:HGNC:32677]	984.874	-0.170675	0.188326	-0.906274	0.364791	0.72647
ENSG00000274210	RNVU1-27	RNA, variant U1 small nuclear 27 [Source:HGNC Symbol;Acc:HGNC:54431]	139.238	-0.255148	0.23334	-1.09346	0.274191	0.634093
ENSG00000274266	SNORA73A	small nucleolar RNA, H/ACA box 73A [Source:HGNC Symbol;Acc:HGNC:10115]	166.329	0.519169	0.237125	2.18944	0.0285652	0.172668
ENSG00000274432			822.798	0.0361674	0.188227	0.192148	0.847626	0.958264
ENSG00000274452			924.289	0.0664873	0.190735	0.348585	0.727401	0.935198
ENSG00000274544	SNORD28	small nucleolar RNA, C/D box 28 [Source:HGNC Symbol;Acc:HGNC:10150]	887.39	0.618864	0.254959	2.42731	0.0152114	0.110645
ENSG00000274582	SNORA16A	small nucleolar RNA, H/ACA box 16A [Source:HGNC Symbol;Acc:HGNC:32605]	471.43	0.643397	0.214975	2.9929	0.00276342	0.0311304
ENSG00000274585	RNU2-1	RNA, U2 small nuclear 1 [Source:HGNC Symbol;Acc:HGNC:10142]	841.445	0.103911	0.191636	0.542228	0.587662	0.891115
ENSG00000274603			73.446	-1.04175	0.291322	-3.57593	0.000348981	0.00879551
ENSG00000274655			16.1317	0.23587	0.497638	0.473979	0.635515	0.903114
ENSG00000274713	MIR7974	microRNA 7974 [Source:HGNC Symbol;Acc:HGNC:49992]	327.082	0.179409	0.202802	0.884651	0.376345	0.738292
ENSG00000274862			845.209	0.0884387	0.191482	0.461863	0.644179	0.904859
ENSG00000274978	RNU11	RNA, U11 small nuclear [Source:HGNC Symbol;Acc:HGNC:10108]	264.532	-0.0397926	0.222239	-0.179053	0.857896	0.959481
ENSG00000274998	SNORA17A	small nucleolar RNA, H/ACA box 17A [Source:HGNC Symbol;Acc:HGNC:32607]	41.6327	0.240606	0.316621	0.759919	0.447303	0.785392
ENSG00000275043	SNORD25	small nucleolar RNA, C/D box 25 [Source:HGNC Symbol;Acc:HGNC:10147]	36517.5	0.381886	0.161858	2.35939	0.0183052	0.124292
ENSG00000275072	SNORD50B	small nucleolar RNA, C/D box 50B [Source:HGNC Symbol;Acc:HGNC:32722]	860.916	0.224575	0.185081	1.21339	0.224981	0.568921
ENSG00000275084	SNORD91B	small nucleolar RNA, C/D box 91B [Source:HGNC Symbol;Acc:HGNC:32753]	150.54	-0.0707478	0.218427	-0.323896	0.746016	0.936837
ENSG00000275110			34.9551	-0.218344	0.367049	-0.594864	0.551935	0.869763
ENSG00000275143	SCARNA16	small Cajal body-specific RNA 16 [Source:HGNC Symbol;Acc:HGNC:32573]	18.5401	0.710652	0.454597	1.56326	0.117992	0.403342
ENSG00000275146			1856.47	0.18786	0.218038	0.861592	0.388912	0.747395
ENSG00000275215	RNA5-8SN3	RNA, 5.8S ribosomal N3 [Source:HGNC Symbol;Acc:HGNC:53525]	158030	-0.0429124	0.178777	-0.240032	0.810305	0.945824
ENSG00000275219			820.196	0.0249862	0.188729	0.132392	0.894674	0.970695
ENSG00000275453	MIR548O2	microRNA 548o-2 [Source:HGNC Symbol;Acc:HGNC:41882]	199.22	-0.0381017	0.233227	-0.163367	0.870229	0.961764
ENSG00000275538	RNVU1-19	RNA, variant U1 small nuclear 19 [Source:HGNC Symbol;Acc:HGNC:48324]	67.6212	-0.198052	0.303605	-0.652333	0.514187	0.84973
ENSG00000275616			820.949	0.113124	0.19489	0.580452	0.56161	0.877221
ENSG00000275692	MIR6724-4	microRNA 6724-4 [Source:HGNC Symbol;Acc:HGNC:50830]	14.2667	0.354573	0.503713	0.703919	0.481483	0.820121
ENSG00000275714	H3C1	H3 clustered histone 1 [Source:HGNC Symbol;Acc:HGNC:4766]	11.2039	-0.0161265	0.579312	-0.0278374	0.977792	0.994141
ENSG00000275745			283.195	-1.04478	0.254738	-4.10137	4.10702e-05	0.00156593
ENSG00000275842	MIR941-5	microRNA 941-5 [Source:HGNC Symbol;Acc:HGNC:50845]	626.116	0.184303	0.189522	0.972461	0.330821	0.6958
ENSG00000275877			196.851	-0.2453	0.261283	-0.938828	0.347819	0.714058
ENSG00000275950	MIR6724-1	microRNA 6724-1 [Source:HGNC Symbol;Acc:HGNC:50837]	13.9995	-0.0126446	0.489353	-0.0258395	0.979385	0.994141
ENSG00000275994	SNORA24	small nucleolar RNA, H/ACA box 24 [Source:HGNC Symbol;Acc:HGNC:32614]	82.5051	0.422221	0.297375	1.41982	0.155659	0.461085
ENSG00000275996	SNORD27	small nucleolar RNA, C/D box 27 [Source:HGNC Symbol;Acc:HGNC:10149]	20082.6	0.460003	0.170964	2.69064	0.00713148	0.0646617
ENSG00000276027	RNU12	RNA, U12 small nuclear [Source:HGNC Symbol;Acc:HGNC:19380]	312.314	0.327918	0.190002	1.72586	0.0843717	0.339083
ENSG00000276036	RNA5SP440	RNA, 5S ribosomal pseudogene 440 [Source:HGNC Symbol;Acc:HGNC:43340]	13.5976	-0.0885988	0.510475	-0.173561	0.86221	0.960055
ENSG00000276083	MIR7976	microRNA 7976 [Source:HGNC Symbol;Acc:HGNC:50092]	40.6092	-0.0627483	0.331993	-0.189005	0.850089	0.958264
ENSG00000276102	MIR6747	microRNA 6747 [Source:HGNC Symbol;Acc:HGNC:50027]	17.4152	-0.976955	0.465433	-2.09902	0.0358149	0.19798
ENSG00000276147	MIR548AY	microRNA 548ay [Source:HGNC Symbol;Acc:HGNC:49943]	54.7831	0.401451	0.292888	1.37066	0.17048	0.479212
ENSG00000276161	SNORA17B	small nucleolar RNA, H/ACA box 17B [Source:HGNC Symbol;Acc:HGNC:32636]	131.793	-0.0416407	0.298033	-0.139718	0.888883	0.968166
ENSG00000276168	RN7SL1	RNA component of signal recognition particle 7SL1 [Source:HGNC Symbol;Acc:HGNC:10038]	67.0586	0.451638	0.276769	1.63183	0.102716	0.378067
ENSG00000276216		novel transcript	42.0941	-0.277553	0.335485	-0.827318	0.408057	0.765171
ENSG00000276232		small Cajal body-specific RNA 10	26.004	-0.203802	0.386632	-0.527121	0.598109	0.892568
ENSG00000276596			828.352	0.0833803	0.199796	0.417327	0.676439	0.915049
ENSG00000276788	SNORD26	small nucleolar RNA, C/D box 26 [Source:HGNC Symbol;Acc:HGNC:10148]	92964.3	0.47907	0.173742	2.75736	0.00582702	0.0566325
ENSG00000276857	MIR6715A	microRNA 6715a [Source:HGNC Symbol;Acc:HGNC:49996]	24.7523	1.79309	0.436924	4.1039	4.06235e-05	0.00156593
ENSG00000276871			253.506	-0.0421393	0.246572	-0.170901	0.864302	0.960055
ENSG00000276966	H4C5	H4 clustered histone 5 [Source:HGNC Symbol;Acc:HGNC:4790]	19.3965	-0.110957	0.421976	-0.262945	0.792593	0.945824
ENSG00000277027	RMRP	RNA component of mitochondrial RNA processing endoribonuclease [Source:HGNC Symbol;Acc:HGNC:10031]	2821.73	0.114693	0.185228	0.619201	0.535784	0.865907
ENSG00000277084	RNU2-4P	RNA, U2 small nuclear 4, pseudogene [Source:HGNC Symbol;Acc:HGNC:10154]	116.779	-0.133903	0.24141	-0.554672	0.579119	0.884305
ENSG00000277108	SNORD49B	small nucleolar RNA, C/D box 49B [Source:HGNC Symbol;Acc:HGNC:32721]	607.777	0.427827	0.217191	1.96982	0.048859	0.242178
ENSG00000277184	SNORA9	small nucleolar RNA, H/ACA box 9 [Source:HGNC Symbol;Acc:HGNC:32597]	76.2449	0.202724	0.269492	0.752246	0.451903	0.788499
ENSG00000277194	SNORD22	small nucleolar RNA, C/D box 22 [Source:HGNC Symbol;Acc:HGNC:10145]	290.698	0.194779	0.203164	0.958725	0.337697	0.703395
ENSG00000277209	RPPH1	ribonuclease P RNA component H1 [Source:HGNC Symbol;Acc:HGNC:19273]	598.41	0.0823421	0.183474	0.448794	0.65358	0.909143
ENSG00000277370	SNORD49A	small nucleolar RNA, C/D box 49A [Source:HGNC Symbol;Acc:HGNC:10189]	275331	0.815592	0.177091	4.60549	4.11498e-06	0.000226629
ENSG00000277379	MIR6724-3	microRNA 6724-3 [Source:HGNC Symbol;Acc:HGNC:50842]	12.8819	0.281877	0.506295	0.556744	0.577703	0.884305
ENSG00000277512	SNORD65	small nucleolar RNA, C/D box 65 [Source:HGNC Symbol;Acc:HGNC:32726]	10448.2	0.640508	0.187592	3.41437	0.000639303	0.0121877
ENSG00000277739			157629	-0.0431329	0.179383	-0.240451	0.80998	0.945824
ENSG00000277846	SNORD30	small nucleolar RNA, C/D box 30 [Source:HGNC Symbol;Acc:HGNC:10157]	483782	0.49029	0.220593	2.2226	0.026243	0.161254
ENSG00000277864	SCARNA15	small Cajal body-specific RNA 15 [Source:HGNC Symbol;Acc:HGNC:32572]	3855.48	-0.250253	0.275125	-0.909598	0.363034	0.726009
ENSG00000277887	SNORA50C	small nucleolar RNA, H/ACA box 50C [Source:HGNC Symbol;Acc:HGNC:32662]	87.2891	0.946129	0.265998	3.5569	0.00037526	0.0091241
ENSG00000277903			846.821	0.0410155	0.186088	0.220409	0.825552	0.951982
ENSG00000277918	RNVU1-28	RNA, variant U1 small nuclear 28 [Source:HGNC Symbol;Acc:HGNC:54432]	493.589	-0.0940524	0.184778	-0.509003	0.61075	0.897074
ENSG00000277947	SNORD3D	small nucleolar RNA, C/D box 3D [Source:HGNC Symbol;Acc:HGNC:33192]	141.242	-0.0566652	0.242812	-0.233371	0.815473	0.945873
ENSG00000277985	SNORA67	small nucleolar RNA, H/ACA box 67 [Source:HGNC Symbol;Acc:HGNC:10224]	28.2728	-0.11658	0.387918	-0.300528	0.763774	0.94271
ENSG00000278048			820.317	0.0614549	0.193615	0.317407	0.750935	0.936837
ENSG00000278099	RNVU1-2A	RNA, variant U1 small nuclear 2A [Source:HGNC Symbol;Acc:HGNC:54430]	194.481	0.0903878	0.240258	0.376211	0.70676	0.922559
ENSG00000278135			21.6684	-0.17064	0.404976	-0.421357	0.673495	0.915049
ENSG00000278189	RNA5-8SN1	RNA, 5.8S ribosomal N1 [Source:HGNC Symbol;Acc:HGNC:53517]	157740	-0.0459877	0.178863	-0.257111	0.797093	0.945824
ENSG00000278223	MIR6783	microRNA 6783 [Source:HGNC Symbol;Acc:HGNC:50159]	16.9898	-0.956554	0.471605	-2.0283	0.04253	0.22347
ENSG00000278233	RNA5-8SN2	RNA, 5.8S ribosomal N2 [Source:HGNC Symbol;Acc:HGNC:53521]	157859	-0.042519	0.17901	-0.237523	0.812251	0.945824
ENSG00000278249	SCARNA2	small Cajal body-specific RNA 2 [Source:HGNC Symbol;Acc:HGNC:32558]	248.501	0.477176	0.203161	2.34876	0.0188362	0.126739
ENSG00000278261	SNORD1A	small nucleolar RNA, C/D box 1A [Source:HGNC Symbol;Acc:HGNC:32556]	198.818	0.134018	0.214891	0.623655	0.532854	0.865015
ENSG00000278274	SNORA61	small nucleolar RNA, H/ACA box 61 [Source:HGNC Symbol;Acc:HGNC:32655]	413.977	0.955564	0.189134	5.05231	4.36504e-07	3.09086e-05
ENSG00000278591			824.971	0.0437579	0.189271	0.231191	0.817166	0.94636
ENSG00000278705	H4C2	H4 clustered histone 2 [Source:HGNC Symbol;Acc:HGNC:4789]	20.2913	0.175971	0.423939	0.415086	0.678079	0.915049
ENSG00000278774			674.443	0.0921627	0.194516	0.473805	0.635639	0.903114
ENSG00000278815			923.099	0.32409	0.204834	1.58221	0.113602	0.401251
ENSG00000278828	H3C10	H3 clustered histone 10 [Source:HGNC Symbol;Acc:HGNC:4775]	15.6554	-0.990541	0.504222	-1.9645	0.0494726	0.243595
ENSG00000279602		TEC	25.3472	-0.212031	0.395754	-0.535765	0.592121	0.891115
ENSG00000280434		novel transcript, sense overlapping PARVB	26.4589	0.258274	0.422152	0.611803	0.540668	0.866351
ENSG00000280466	SCARNA4	small Cajal body-specific RNA 4 [Source:HGNC Symbol;Acc:HGNC:32560]	242.34	-0.394222	0.25124	-1.56911	0.116623	0.402363
ENSG00000280496	SNORA17B	small nucleolar RNA, H/ACA box 17B [Source:HGNC Symbol;Acc:HGNC:32636]	131.793	-0.0416407	0.298033	-0.139718	0.888883	0.968166
ENSG00000280498	SNORA16A	small nucleolar RNA, H/ACA box 16A [Source:HGNC Symbol;Acc:HGNC:32605]	471.43	0.643397	0.214975	2.9929	0.00276342	0.0311304
ENSG00000280554			551.092	0.0222558	0.210062	0.105949	0.915623	0.977505
ENSG00000280904			5647.55	0.437032	0.25848	1.69078	0.0908792	0.35566
ENSG00000280913	CTSLP3	cathepsin L pseudogene 3 [Source:HGNC Symbol;Acc:HGNC:2541]	37.9883	0.689092	0.345837	1.99253	0.0463125	0.234241
ENSG00000280968			215.54	0.161086	0.204733	0.786811	0.431392	0.77101
ENSG00000281000	SNORD3D	small nucleolar RNA, C/D box 3D [Source:HGNC Symbol;Acc:HGNC:33192]	141.242	-0.0566652	0.242812	-0.233371	0.815473	0.945873
ENSG00000281010			13531.7	0.601039	0.170628	3.52251	0.000427485	0.00948761
ENSG00000281156	MIR3651	microRNA 3651 [Source:HGNC Symbol;Acc:HGNC:38897]	18.4855	-0.351571	0.439076	-0.800708	0.423301	0.770438
ENSG00000281295			55.1439	0.0468146	0.354612	0.132016	0.894972	0.970695
ENSG00000281311			87.2891	0.946129	0.265998	3.5569	0.00037526	0.0091241
ENSG00000281344	HELLPAR	HELLP associated long non-coding RNA [Source:HGNC Symbol;Acc:HGNC:43984]	21.7721	0.0428114	0.408069	0.104912	0.916446	0.977505
ENSG00000281394	SCARNA4	small Cajal body-specific RNA 4 [Source:HGNC Symbol;Acc:HGNC:32560]	242.34	-0.394222	0.25124	-1.56911	0.116623	0.402363
ENSG00000281406	BLACAT1	bladder cancer associated transcript 1 [Source:HGNC Symbol;Acc:HGNC:48597]	11.5252	-0.568387	0.575704	-0.98729	0.3235	0.689726
ENSG00000281696	MIR664A	microRNA 664a [Source:HGNC Symbol;Acc:HGNC:35370]	81.7382	0.141125	0.282647	0.499297	0.61757	0.898889
ENSG00000281780			1782.63	0.565288	0.172504	3.27695	0.00104936	0.0158969
ENSG00000281808			41.6327	0.240606	0.316621	0.759919	0.447303	0.785392
ENSG00000281842	MIR1291	microRNA 1291 [Source:HGNC Symbol;Acc:HGNC:35284]	3944.02	0.195284	0.165379	1.18083	0.237672	0.583224
ENSG00000281859	SNORD38B	small nucleolar RNA, C/D box 38B [Source:HGNC Symbol;Acc:HGNC:30356]	641.204	0.249667	0.200396	1.24587	0.212813	0.54865
ENSG00000281880	PAUPAR	PAX6 upstream antisense RNA [Source:HGNC Symbol;Acc:HGNC:49670]	11.7322	1.04626	0.569275	1.83788	0.0660794	0.293313
ENSG00000281910	SNORA50A	small nucleolar RNA, H/ACA box 50A [Source:HGNC Symbol;Acc:HGNC:32643]	163.526	0.0252157	0.222754	0.1132	0.909872	0.977505
ENSG00000282885		novel transcript	54.1728	0.569789	0.293507	1.94131	0.0522203	0.2498
ENSG00000282988		novel protein	11.3853	-0.450416	0.543645	-0.828512	0.407381	0.765171
ENSG00000283160	MIR4521	microRNA 4521 [Source:HGNC Symbol;Acc:HGNC:41813]	1469.48	0.216369	0.193112	1.12043	0.262529	0.62012
ENSG00000283203	MIR1246	microRNA 1246 [Source:HGNC Symbol;Acc:HGNC:35312]	11.0088	0.948866	0.566041	1.67632	0.0936756	0.359937
ENSG00000283206	MIR941-1	microRNA 941-1 [Source:HGNC Symbol;Acc:HGNC:33684]	314.052	0.318071	0.198873	1.59937	0.109739	0.39416
ENSG00000283274			581.659	-0.110977	0.233763	-0.474743	0.63497	0.903114
ENSG00000283291			175.315	-0.140859	0.225036	-0.625943	0.531352	0.864465
ENSG00000283293	RN7SK	RNA component of 7SK nuclear ribonucleoprotein [Source:HGNC Symbol;Acc:HGNC:10037]	163.976	0.449637	0.291878	1.5405	0.123439	0.413295
ENSG00000283379	MIR3688-2	microRNA 3688-2 [Source:HGNC Symbol;Acc:HGNC:41735]	20.1759	0.772483	0.427634	1.80641	0.0708542	0.305392
ENSG00000283409	MIR3662	microRNA 3662 [Source:HGNC Symbol;Acc:HGNC:38983]	20.8626	-0.445066	0.461141	-0.965141	0.334474	0.699526
ENSG00000283513	MIR941-3	microRNA 941-3 [Source:HGNC Symbol;Acc:HGNC:33686]	618.924	0.104884	0.191021	0.549071	0.582957	0.886356
ENSG00000283522	MIR3150A	microRNA 3150a [Source:HGNC Symbol;Acc:HGNC:38362]	13.6232	0.22308	0.502319	0.444101	0.65697	0.909603
ENSG00000283551	SNORD98	small nucleolar RNA, C/D box 98 [Source:HGNC Symbol;Acc:HGNC:32761]	1407.3	0.153063	0.322022	0.475319	0.634559	0.903114
ENSG00000283558	MIR3158-2	microRNA 3158-2 [Source:HGNC Symbol;Acc:HGNC:38279]	91.668	1.18425	0.251102	4.71623	2.4026e-06	0.000143339
ENSG00000283568			23.6621	-0.218469	0.452188	-0.483138	0.628998	0.902562
ENSG00000283638		novel transcript	23222.7	-0.0925869	0.165822	-0.55835	0.576606	0.884124
ENSG00000283677	MIR3913-2	microRNA 3913-2 [Source:HGNC Symbol;Acc:HGNC:38953]	14.0546	0.113024	0.497123	0.227356	0.820147	0.949073
ENSG00000283705	MIR92A1	microRNA 92a-1 [Source:HGNC Symbol;Acc:HGNC:31643]	72101.8	-0.13507	0.168307	-0.80252	0.422252	0.770438
ENSG00000283733	MIR146A	microRNA 146a [Source:HGNC Symbol;Acc:HGNC:31533]	5015.24	-0.547927	0.269788	-2.03095	0.0422596	0.222837
ENSG00000283736	MIR484	microRNA 484 [Source:HGNC Symbol;Acc:HGNC:32341]	774.358	0.219349	0.182651	1.20092	0.229783	0.573302
ENSG00000283745	MIR196B	microRNA 196b [Source:HGNC Symbol;Acc:HGNC:31790]	96.0246	-1.77364	0.279826	-6.33836	2.32227e-10	4.31652e-08
ENSG00000283762	MIR20A	microRNA 20a [Source:HGNC Symbol;Acc:HGNC:31577]	10883.2	0.15966	0.313836	0.508737	0.610936	0.897074
ENSG00000283785	MIR15A	microRNA 15a [Source:HGNC Symbol;Acc:HGNC:31543]	109.059	-0.0143435	0.282194	-0.0508284	0.959462	0.994141
ENSG00000283797	MIR29B1	microRNA 29b-1 [Source:HGNC Symbol;Acc:HGNC:31619]	15.6613	-0.155275	0.485375	-0.319908	0.749038	0.936837
ENSG00000283815	MIR18A	microRNA 18a [Source:HGNC Symbol;Acc:HGNC:31548]	476.64	-0.140218	0.190596	-0.735684	0.461923	0.800057
ENSG00000283824	MIR22	microRNA 22 [Source:HGNC Symbol;Acc:HGNC:31599]	2739.75	0.132901	0.176434	0.753265	0.451291	0.788499
ENSG00000283857	MIR1247	microRNA 1247 [Source:HGNC Symbol;Acc:HGNC:35313]	16.5724	-1.27746	0.523846	-2.43862	0.0147436	0.108827
ENSG00000283867	MIR1307	microRNA 1307 [Source:HGNC Symbol;Acc:HGNC:35372]	2928.82	-0.327663	0.180705	-1.81325	0.069794	0.304351
ENSG00000283871	MIR130B	microRNA 130b [Source:HGNC Symbol;Acc:HGNC:31515]	3251.78	-0.409533	0.177513	-2.30706	0.0210516	0.137297
ENSG00000283891	MIR628	microRNA 628 [Source:HGNC Symbol;Acc:HGNC:32884]	25.0774	-0.108678	0.399308	-0.272165	0.785496	0.945824
ENSG00000283907		novel transcript, antisense to ATP4A	309.807	-0.0879995	0.218965	-0.401888	0.687766	0.916518
ENSG00000283926	MIR192	microRNA 192 [Source:HGNC Symbol;Acc:HGNC:31562]	148394	0.0996644	0.178146	0.559455	0.575851	0.884124
ENSG00000283929	MIR5010	microRNA 5010 [Source:HGNC Symbol;Acc:HGNC:43484]	91.3963	-0.190966	0.258104	-0.73988	0.459373	0.797999
ENSG00000283935	MIR423	microRNA 423 [Source:HGNC Symbol;Acc:HGNC:31880]	26656.6	-0.36313	0.168596	-2.15384	0.0312525	0.182962
ENSG00000283958	MIR1248	microRNA 1248 [Source:HGNC Symbol;Acc:HGNC:35314]	76.3812	-1.05899	0.4044	-2.61866	0.00882755	0.0745828
ENSG00000283978	MIR365B	microRNA 365b [Source:HGNC Symbol;Acc:HGNC:33693]	191.675	-0.629969	0.233118	-2.70236	0.00688494	0.0635066
ENSG00000283990	MIRLET7A3	microRNA let-7a-3 [Source:HGNC Symbol;Acc:HGNC:31478]	530.711	-0.869821	0.209219	-4.15748	3.21784e-05	0.00132915
ENSG00000284032	MIR29A	microRNA 29a [Source:HGNC Symbol;Acc:HGNC:31616]	819.62	0.267843	0.187659	1.42728	0.153499	0.457969
ENSG00000284038	MIR10A	microRNA 10a [Source:HGNC Symbol;Acc:HGNC:31497]	24.8168	-3.65931	0.598065	-6.11858	9.44151e-10	1.16996e-07
ENSG00000284040	MIR296	microRNA 296 [Source:HGNC Symbol;Acc:HGNC:31617]	521.391	-0.97395	0.184236	-5.28642	1.24731e-07	1.03042e-05
ENSG00000284043	MIR20B	microRNA 20b [Source:HGNC Symbol;Acc:HGNC:32024]	19.2895	-0.417592	0.477598	-0.874359	0.381923	0.743741
ENSG00000284078	SNORD138	small nucleolar RNA, C/D box 138 [Source:HGNC Symbol;Acc:HGNC:50420]	75.7662	-0.169509	0.269651	-0.628623	0.529596	0.863496
ENSG00000284107	MIR19B2	microRNA 19b-2 [Source:HGNC Symbol;Acc:HGNC:31576]	183.188	0.054459	0.217924	0.249899	0.802666	0.945824
ENSG00000284112	MIR195	microRNA 195 [Source:HGNC Symbol;Acc:HGNC:31566]	24.525	1.11737	0.394835	2.82997	0.00465531	0.0480725
ENSG00000284118	MIR4707	microRNA 4707 [Source:HGNC Symbol;Acc:HGNC:41531]	11	-0.0820844	0.568549	-0.144375	0.885204	0.967156
ENSG00000284154	MIR3605	microRNA 3605 [Source:HGNC Symbol;Acc:HGNC:38922]	28.4872	-0.196794	0.408616	-0.481611	0.630082	0.902632
ENSG00000284155	MIR194-2	microRNA 194-2 [Source:HGNC Symbol;Acc:HGNC:31565]	5815.64	0.100043	0.278426	0.359316	0.719359	0.926938
ENSG00000284157	MIR106A	microRNA 106a [Source:HGNC Symbol;Acc:HGNC:31494]	20.6076	0.431853	0.538952	0.801282	0.422969	0.770438
ENSG00000284159	MIR3940	microRNA 3940 [Source:HGNC Symbol;Acc:HGNC:38893]	20.2183	0.152039	0.436586	0.348245	0.727656	0.935198
ENSG00000284160	MIR7706	microRNA 7706 [Source:HGNC Symbol;Acc:HGNC:50110]	420.042	-0.44947	0.207698	-2.16405	0.0304602	0.17974
ENSG00000284179	MIR7-1	microRNA 7-1 [Source:HGNC Symbol;Acc:HGNC:31638]	10610.4	-0.0388531	0.174618	-0.222504	0.823922	0.95122
ENSG00000284182	MIR143	microRNA 143 [Source:HGNC Symbol;Acc:HGNC:31530]	225.465	-0.999562	0.344782	-2.89911	0.00374223	0.0397654
ENSG00000284186	MIR3615	microRNA 3615 [Source:HGNC Symbol;Acc:HGNC:38905]	55.4895	-0.613092	0.295401	-2.07546	0.0379442	0.205923
ENSG00000284190	MIR21	microRNA 21 [Source:HGNC Symbol;Acc:HGNC:31586]	620359	0.2817	0.200897	1.40221	0.160853	0.466581
ENSG00000284191	MIR671	microRNA 671 [Source:HGNC Symbol;Acc:HGNC:33134]	732.715	0.149767	0.189533	0.790188	0.429418	0.77101
ENSG00000284193	MIR1257	microRNA 1257 [Source:HGNC Symbol;Acc:HGNC:35322]	244.845	0.0819818	0.206079	0.397817	0.690765	0.917114
ENSG00000284202	MIR137	microRNA 137 [Source:HGNC Symbol;Acc:HGNC:31523]	13.2643	-0.173236	0.548764	-0.315685	0.752242	0.936837
ENSG00000284203	MIR29B2	microRNA 29b-2 [Source:HGNC Symbol;Acc:HGNC:31620]	14.5762	0.664977	0.478481	1.38977	0.1646	0.469998
ENSG00000284204	MIR19A	microRNA 19a [Source:HGNC Symbol;Acc:HGNC:31574]	767.083	-0.00486477	0.195553	-0.024877	0.980153	0.994141
ENSG00000284231	MIR424	microRNA 424 [Source:HGNC Symbol;Acc:HGNC:31881]	164.786	0.279697	0.22295	1.25453	0.20965	0.545971
ENSG00000284247	MIR2682	microRNA 2682 [Source:HGNC Symbol;Acc:HGNC:41688]	229.551	0.166454	0.211025	0.78879	0.430235	0.77101
ENSG00000284280	MIR6843	microRNA 6843 [Source:HGNC Symbol;Acc:HGNC:50240]	12.761	0.503291	0.510007	0.986832	0.323725	0.689726
ENSG00000284288	MIR378D2	microRNA 378d-2 [Source:HGNC Symbol;Acc:HGNC:41797]	11.3869	-0.241986	0.604815	-0.400099	0.689083	0.916518
ENSG00000284329	MIR9-3	microRNA 9-3 [Source:HGNC Symbol;Acc:HGNC:31646]	45.8941	-0.630915	0.358981	-1.75752	0.0788298	0.324709
ENSG00000284336	MIR2277	microRNA 2277 [Source:HGNC Symbol;Acc:HGNC:37314]	128.259	0.834647	0.234893	3.5533	0.000380427	0.0091241
ENSG00000284357	MIR34A	microRNA 34a [Source:HGNC Symbol;Acc:HGNC:31635]	270.954	0.779145	0.223089	3.49253	0.000478467	0.0103113
ENSG00000284361	MIR4745	microRNA 4745 [Source:HGNC Symbol;Acc:HGNC:41868]	19.1431	-1.01568	0.477794	-2.12577	0.0335223	0.190258
ENSG00000284375	MIR19B1	microRNA 19b-1 [Source:HGNC Symbol;Acc:HGNC:31575]	759.435	0.106147	0.186875	0.56801	0.570028	0.883894
ENSG00000284386	MIR147B	microRNA 147b [Source:HGNC Symbol;Acc:HGNC:33655]	11.1604	0.0194137	0.570724	0.034016	0.972864	0.994141
ENSG00000284387	MIR24-2	microRNA 24-2 [Source:HGNC Symbol;Acc:HGNC:31608]	717.159	-0.534229	0.204734	-2.60938	0.00907053	0.0760272
ENSG00000284415	MIR1287	microRNA 1287 [Source:HGNC Symbol;Acc:HGNC:35280]	19.7567	-1.56311	0.462972	-3.37626	0.000734797	0.0126085
ENSG00000284416	MIR1908	microRNA 1908 [Source:HGNC Symbol;Acc:HGNC:35392]	337.867	0.224851	0.194314	1.15715	0.247211	0.595791
ENSG00000284440	MIR122	microRNA 122 [Source:HGNC Symbol;Acc:HGNC:31501]	269067	0.325685	0.226518	1.43779	0.150494	0.456783
ENSG00000284442	MIR2110	microRNA 2110 [Source:HGNC Symbol;Acc:HGNC:37071]	141.402	-0.287132	0.229894	-1.24898	0.211673	0.54865
ENSG00000284443	MIR197	microRNA 197 [Source:HGNC Symbol;Acc:HGNC:31569]	1987.15	-0.438721	0.24736	-1.77361	0.0761269	0.31798
ENSG00000284447	MIR9-2	microRNA 9-2 [Source:HGNC Symbol;Acc:HGNC:31642]	12.4527	-0.321952	0.54451	-0.59127	0.55434	0.869763
ENSG00000284458	MIR1304	microRNA 1304 [Source:HGNC Symbol;Acc:HGNC:35302]	452.483	1.32753	0.191041	6.94891	3.68113e-12	1.09477e-09
ENSG00000284459	MIR24-1	microRNA 24-1 [Source:HGNC Symbol;Acc:HGNC:31607]	2049.55	-0.555878	0.205981	-2.69869	0.00696139	0.0635066
ENSG00000284464	MIR1306	microRNA 1306 [Source:HGNC Symbol;Acc:HGNC:35371]	69.0211	-0.59694	0.277386	-2.15202	0.0313958	0.18308
ENSG00000284481	MIR1292	microRNA 1292 [Source:HGNC Symbol;Acc:HGNC:35364]	99.6526	-0.276021	0.259092	-1.06534	0.286723	0.654915
ENSG00000284536	MIR17	microRNA 17 [Source:HGNC Symbol;Acc:HGNC:31547]	4849.31	-0.0161354	0.286495	-0.0563199	0.955087	0.994141
ENSG00000284538	MIR92A2	microRNA 92a-2 [Source:HGNC Symbol;Acc:HGNC:31644]	22993.8	-0.0933272	0.165685	-0.563283	0.573243	0.884124
ENSG00000284544	MIR330	microRNA 330 [Source:HGNC Symbol;Acc:HGNC:31771]	212.934	0.0704568	0.213906	0.329382	0.741867	0.936837
ENSG00000284586	MIR92B	microRNA 92b [Source:HGNC Symbol;Acc:HGNC:32920]	1038.19	0.17754	0.17285	1.02713	0.304357	0.672639
ENSG00000284596	MIR4467	microRNA 4467 [Source:HGNC Symbol;Acc:HGNC:41896]	39.567	-0.297823	0.324446	-0.917944	0.358648	0.723112
ENSG00000284623	LINC02786	long intergenic non-protein coding RNA 2786 [Source:HGNC Symbol;Acc:HGNC:54307]	138.688	-0.304131	0.260109	-1.16925	0.242304	0.588736
ENSG00000285546			416.423	0.0546183	0.221374	0.246724	0.805122	0.945824
ENSG00000285574			28.436	-0.239744	0.374347	-0.640431	0.521892	0.855627
ENSG00000285646		novel transcript	966.002	0.0890781	0.266283	0.334524	0.737984	0.936837
ENSG00000285674			424.391	0.467228	0.314066	1.48767	0.136837	0.433897
ENSG00000285776			6894.5	-0.122461	0.230783	-0.530631	0.595674	0.891115
ENSG00000285920		novel protein	11.273	0.356877	0.547219	0.652164	0.514295	0.84973
ENSG00000286171		RNA, Ro-associated Y5	1416.08	-0.334084	0.207287	-1.6117	0.107027	0.390071
ENSG00000286172	RNVU1-8	RNA, variant U1 small nuclear 8 [Source:HGNC Symbol;Acc:HGNC:48315]	22.2361	0.412604	0.407973	1.01135	0.311849	0.678254
ENSG00000287190		novel transcript	22.0862	-0.369847	0.417845	-0.88513	0.376087	0.738292
ENSG00000287695		novel transcript, sense intronic to GALNT10	12.5353	-0.55152	0.542546	-1.01654	0.309372	0.677521
ENSG00000287979		novel transcript	73.5322	-0.0907248	0.297466	-0.304992	0.760372	0.94271
