# Supplementary material
Source: HighWire-hosted journal article supplement (doi:10.1101/rna.080097.124)
Supplement: Supplemental_TableS15b.xlsx [file Supplemental_TableS15b.xlsx]

## Sheet: res3_remi_biomart_only_DE_RNA_R
ensembl_gene_id	hgnc_symbol	description	baseMean	log2FoldChange	lfcSE	stat	pvalue	padj
ENSG00000207744	MIR10B	microRNA 10b [Source:HGNC Symbol;Acc:HGNC:31498]	8610.31	-6.5761	0.204663	-32.1314	1.61e-226	2.39e-223
ENSG00000265841	MIR548X	microRNA 548x [Source:HGNC Symbol;Acc:HGNC:38248]	231.636	-3.63517	0.258842	-14.044	8.39e-45	6.24e-42
ENSG00000207994	MIR100	microRNA 100 [Source:HGNC Symbol;Acc:HGNC:31487]	8618.15	-1.51086	0.182763	-8.2668	1.38e-16	6.82e-14
ENSG00000263436	MIR3158-1	microRNA 3158-1 [Source:HGNC Symbol;Acc:HGNC:38196]	269.83	1.45042	0.204218	7.10232	1.23e-12	4.56e-10
ENSG00000284458	MIR1304	microRNA 1304 [Source:HGNC Symbol;Acc:HGNC:35302]	452.483	1.32753	0.191041	6.94891	3.68e-12	1.09e-09
ENSG00000207781	MIR625	microRNA 625 [Source:HGNC Symbol;Acc:HGNC:32881]	237.173	1.42272	0.206179	6.9004	5.19e-12	1.29e-09
ENSG00000202601	MIR582	microRNA 582 [Source:HGNC Symbol;Acc:HGNC:32838]	2252.53	1.18161	0.182532	6.47342	9.58e-11	2.04e-08
ENSG00000283745	MIR196B	microRNA 196b [Source:HGNC Symbol;Acc:HGNC:31790]	96.0246	-1.77364	0.279826	-6.33836	2.32e-10	4.32e-08
ENSG00000207805	MIR483	microRNA 483 [Source:HGNC Symbol;Acc:HGNC:32340]	1500.58	-1.14392	0.184983	-6.1839	6.25e-10	9.3e-08
ENSG00000284038	MIR10A	microRNA 10a [Source:HGNC Symbol;Acc:HGNC:31497]	24.8168	-3.65931	0.598065	-6.11858	9.44e-10	1.17e-07
ENSG00000207571	MIR615	microRNA 615 [Source:HGNC Symbol;Acc:HGNC:32871]	1244.85	-1.17255	0.193449	-6.06128	1.35e-09	1.54e-07
ENSG00000206597	SNORA57	small nucleolar RNA, H/ACA box 57 [Source:HGNC Symbol;Acc:HGNC:32651]	748.87	1.0327	0.181774	5.68121	1.34e-08	1.42e-06
ENSG00000207548	MIR217	microRNA 217 [Source:HGNC Symbol;Acc:HGNC:31594]	508.192	-1.81234	0.329672	-5.49739	3.85e-08	3.58e-06
ENSG00000284040	MIR296	microRNA 296 [Source:HGNC Symbol;Acc:HGNC:31617]	521.391	-0.97395	0.184236	-5.28642	1.25e-07	1.03e-05
ENSG00000263581	MIR548X2	microRNA 548x-2 [Source:HGNC Symbol;Acc:HGNC:41734]	15.3278	-3.88536	0.766943	-5.06603	4.06e-07	3.02e-05
ENSG00000278274	SNORA61	small nucleolar RNA, H/ACA box 61 [Source:HGNC Symbol;Acc:HGNC:32655]	413.977	0.955564	0.189134	5.05231	4.37e-07	3.09e-05
ENSG00000207951	MIR561	microRNA 561 [Source:HGNC Symbol;Acc:HGNC:32817]	38.9686	1.67493	0.336344	4.97982	6.36e-07	4.3e-05
ENSG00000211520	MIR216B	microRNA 216b [Source:HGNC Symbol;Acc:HGNC:33668]	147.071	-1.50088	0.310382	-4.83559	1.33e-06	8.58e-05
ENSG00000283558	MIR3158-2	microRNA 3158-2 [Source:HGNC Symbol;Acc:HGNC:38279]	91.668	1.18425	0.251102	4.71623	2.4e-06	0.000143339
ENSG00000201098	RNY1	RNA, Ro60-associated Y1 [Source:HGNC Symbol;Acc:HGNC:10242]	3834.98	-0.793928	0.171653	-4.6252	3.74e-06	0.000214039
ENSG00000277370	SNORD49A	small nucleolar RNA, C/D box 49A [Source:HGNC Symbol;Acc:HGNC:10189]	275331	0.815592	0.177091	4.60549	4.11e-06	0.000226629
ENSG00000175061	SNHG29	small nucleolar RNA host gene 29 [Source:HGNC Symbol;Acc:HGNC:28619]	286399	0.808247	0.176083	4.59015	4.43e-06	0.000235228
ENSG00000198973	MIR375	microRNA 375 [Source:HGNC Symbol;Acc:HGNC:31868]	103.691	1.11879	0.254312	4.3993	1.09e-05	0.000556857
ENSG00000207737	MIR181B2	microRNA 181b-2 [Source:HGNC Symbol;Acc:HGNC:31551]	1788.53	-0.903794	0.206423	-4.37835	1.2e-05	0.000592733
ENSG00000199165	MIRLET7A1	microRNA let-7a-1 [Source:HGNC Symbol;Acc:HGNC:31476]	561.887	-0.881472	0.206214	-4.27455	1.92e-05	0.000918691
ENSG00000202503	SNORD34	small nucleolar RNA, C/D box 34 [Source:HGNC Symbol;Acc:HGNC:10161]	1111.34	0.728022	0.174233	4.17845	2.94e-05	0.00124696
ENSG00000283990	MIRLET7A3	microRNA let-7a-3 [Source:HGNC Symbol;Acc:HGNC:31478]	530.711	-0.869821	0.209219	-4.15748	3.22e-05	0.00132915
ENSG00000276857	MIR6715A	microRNA 6715a [Source:HGNC Symbol;Acc:HGNC:49996]	24.7523	1.79309	0.436924	4.1039	4.06e-05	0.00156594
ENSG00000207586	MIR135A2	microRNA 135a-2 [Source:HGNC Symbol;Acc:HGNC:31521]	32.0903	1.53056	0.375696	4.07392	4.62e-05	0.00171852
ENSG00000199631	SNORD33	small nucleolar RNA, C/D box 33 [Source:HGNC Symbol;Acc:HGNC:10160]	2245.87	0.690276	0.17062	4.04568	5.22e-05	0.00189214
ENSG00000206941	SNORD15A	small nucleolar RNA, C/D box 15A [Source:HGNC Symbol;Acc:HGNC:10114]	1157.44	0.757602	0.188404	4.02117	5.79e-05	0.00200263
ENSG00000201675	SNORD32A	small nucleolar RNA, C/D box 32A [Source:HGNC Symbol;Acc:HGNC:10159]	1701.49	0.682301	0.173682	3.92845	8.55e-05	0.00282512
ENSG00000197989	SNHG12	small nucleolar RNA host gene 12 [Source:HGNC Symbol;Acc:HGNC:30062]	1235.54	0.70015	0.179199	3.90711	9.34e-05	0.00295519
ENSG00000212232	SNORD17	small nucleolar RNA, C/D box 17 [Source:HGNC Symbol;Acc:HGNC:32713]	5743.14	0.709656	0.185681	3.82191	0.000132423	0.00401862
ENSG00000207595	MIR181A2	microRNA 181a-2 [Source:HGNC Symbol;Acc:HGNC:31549]	3391.12	-0.755971	0.203565	-3.71366	0.000204281	0.00595619
ENSG00000263813	MIR3679	microRNA 3679 [Source:HGNC Symbol;Acc:HGNC:38979]	19.6452	-1.79699	0.500322	-3.59168	0.000328555	0.0085024
ENSG00000245910	SNHG6	small nucleolar RNA host gene 6 [Source:HGNC Symbol;Acc:HGNC:32965]	11261.7	0.636729	0.177399	3.58925	0.000331634	0.0085024
ENSG00000254341	SNORD87	small nucleolar RNA, C/D box 87 [Source:HGNC Symbol;Acc:HGNC:32746]	11260	0.636812	0.177357	3.59057	0.000329958	0.0085024
ENSG00000284336	MIR2277	microRNA 2277 [Source:HGNC Symbol;Acc:HGNC:37314]	128.259	0.834647	0.234893	3.5533	0.000380427	0.00912411
ENSG00000277887	SNORA50C	small nucleolar RNA, H/ACA box 50C [Source:HGNC Symbol;Acc:HGNC:32662]	87.2891	0.946129	0.265998	3.5569	0.00037526	0.00912411
ENSG00000238711	RNY4P25	RNY4 pseudogene 25 [Source:HGNC Symbol;Acc:HGNC:42475]	267.461	-0.847843	0.239199	-3.5445	0.000393353	0.00928438
ENSG00000198976	MIR429	microRNA 429 [Source:HGNC Symbol;Acc:HGNC:13784]	29.3935	-1.35768	0.385134	-3.52521	0.000423146	0.00948761
ENSG00000206630	SNORD60	small nucleolar RNA, C/D box 60 [Source:HGNC Symbol;Acc:HGNC:10217]	13531.7	0.601039	0.170628	3.52251	0.000427485	0.00948761
ENSG00000266402	SNHG25	small nucleolar RNA host gene 25 [Source:HGNC Symbol;Acc:HGNC:51534]	89.5033	0.938134	0.265851	3.52879	0.000417459	0.00948761
ENSG00000216009	MIR874	microRNA 874 [Source:HGNC Symbol;Acc:HGNC:33643]	38.0196	-1.19434	0.340271	-3.50997	0.000448158	0.00980016
ENSG00000284357	MIR34A	microRNA 34a [Source:HGNC Symbol;Acc:HGNC:31635]	270.954	0.779145	0.223089	3.49253	0.000478467	0.0103113
ENSG00000207798	MIR216A	microRNA 216a [Source:HGNC Symbol;Acc:HGNC:31593]	85.3688	-1.28762	0.372473	-3.45695	0.000546319	0.0111284
ENSG00000266423	MIR3163	microRNA 3163 [Source:HGNC Symbol;Acc:HGNC:38209]	39.9294	1.35425	0.393074	3.44529	0.000570449	0.0114629
ENSG00000200087	SNORA73B	small nucleolar RNA, H/ACA box 73B [Source:HGNC Symbol;Acc:HGNC:10116]	508.438	0.6289	0.182951	3.43753	0.000587046	0.0115534
ENSG00000277512	SNORD65	small nucleolar RNA, C/D box 65 [Source:HGNC Symbol;Acc:HGNC:32726]	10448.2	0.640508	0.187592	3.41437	0.000639303	0.0121877
ENSG00000207145	SNORA18	small nucleolar RNA, H/ACA box 18 [Source:HGNC Symbol;Acc:HGNC:32608]	950.803	0.630558	0.185278	3.40332	0.000665734	0.012531
ENSG00000284415	MIR1287	microRNA 1287 [Source:HGNC Symbol;Acc:HGNC:35280]	19.7567	-1.56311	0.462972	-3.37626	0.000734797	0.0126085
ENSG00000200064	RNY4P9	RNY4 pseudogene 9 [Source:HGNC Symbol;Acc:HGNC:34058]	83.0646	-0.940366	0.277188	-3.39253	0.000692513	0.0126085
ENSG00000201638	RNY4P16	RNY4 pseudogene 16 [Source:HGNC Symbol;Acc:HGNC:34066]	209.059	-0.82533	0.243535	-3.38896	0.000701591	0.0126085
ENSG00000198975	MIRLET7A2	microRNA let-7a-2 [Source:HGNC Symbol;Acc:HGNC:31477]	231.58	-0.782016	0.231913	-3.37203	0.000746163	0.0126085
ENSG00000207563	MIR23B	microRNA 23b [Source:HGNC Symbol;Acc:HGNC:31606]	3628.76	-0.602846	0.177503	-3.39625	0.000683147	0.0126085
ENSG00000221381	SNORD88B	small nucleolar RNA, C/D box 88B [Source:HGNC Symbol;Acc:HGNC:32748]	542.014	0.638582	0.189838	3.36382	0.000768718	0.0128436
ENSG00000221585	MIR1226	microRNA 1226 [Source:HGNC Symbol;Acc:HGNC:33922]	45.4342	-1.05872	0.318877	-3.32014	0.000899728	0.0146716
ENSG00000252316	RNY4	RNA, Ro60-associated Y4 [Source:HGNC Symbol;Acc:HGNC:10244]	13976.5	-0.598763	0.180506	-3.31713	0.000909475	0.0146716
ENSG00000202441	RNY4P10	RNY4 pseudogene 10 [Source:HGNC Symbol;Acc:HGNC:34060]	13221.2	-0.591842	0.179346	-3.3	0.000966854	0.0150084
ENSG00000266437	MIR4746	microRNA 4746 [Source:HGNC Symbol;Acc:HGNC:41904]	197.676	-0.754318	0.231049	-3.26476	0.00109558	0.0162913
ENSG00000264788	MIR3148	microRNA 3148 [Source:HGNC Symbol;Acc:HGNC:38215]	13.4444	1.70501	0.529458	3.2203	0.00128057	0.0181352
ENSG00000207717	MIR551B	microRNA 551b [Source:HGNC Symbol;Acc:HGNC:32807]	19.0906	1.43762	0.448964	3.20208	0.00136439	0.01914
ENSG00000207654	MIR128-1	microRNA 128-1 [Source:HGNC Symbol;Acc:HGNC:31510]	5305.52	-0.671823	0.21069	-3.18869	0.00142921	0.019862
ENSG00000239195	SNORD5	small nucleolar RNA, C/D box 5 [Source:HGNC Symbol;Acc:HGNC:32702]	5095.26	0.641265	0.202005	3.1745	0.00150095	0.0204763
ENSG00000200211	RNY4P27	RNY4 pseudogene 27 [Source:HGNC Symbol;Acc:HGNC:42495]	196.372	-0.711449	0.224654	-3.16687	0.00154091	0.0208303
ENSG00000266194	MIR4661	microRNA 4661 [Source:HGNC Symbol;Acc:HGNC:41582]	162.4	0.748017	0.237605	3.14816	0.00164304	0.0220108
ENSG00000207773	MIR642A	microRNA 642a [Source:HGNC Symbol;Acc:HGNC:32898]	39.6225	1.0976	0.349019	3.14482	0.00166187	0.0220643
ENSG00000201818	RNY4P17	RNY4 pseudogene 17 [Source:HGNC Symbol;Acc:HGNC:34067]	304.165	-0.621646	0.200715	-3.09716	0.00195387	0.0244481
ENSG00000199030	MIRLET7C	microRNA let-7c [Source:HGNC Symbol;Acc:HGNC:31480]	254.938	-0.694812	0.226385	-3.06915	0.00214665	0.0258316
ENSG00000266719	MIR4676	microRNA 4676 [Source:HGNC Symbol;Acc:HGNC:41691]	14.9619	1.62821	0.534101	3.0485	0.00229984	0.0271417
ENSG00000252712	SCARNA14	small Cajal body-specific RNA 14 [Source:HGNC Symbol;Acc:HGNC:32571]	234.925	-0.662036	0.220292	-3.00526	0.00265355	0.0303525
ENSG00000274582	SNORA16A	small nucleolar RNA, H/ACA box 16A [Source:HGNC Symbol;Acc:HGNC:32605]	471.43	0.643397	0.214975	2.9929	0.00276342	0.0311304
ENSG00000280498	SNORA16A	small nucleolar RNA, H/ACA box 16A [Source:HGNC Symbol;Acc:HGNC:32605]	471.43	0.643397	0.214975	2.9929	0.00276342	0.0311304
ENSG00000284182	MIR143	microRNA 143 [Source:HGNC Symbol;Acc:HGNC:31530]	225.465	-0.999562	0.344782	-2.89911	0.00374223	0.0397654
ENSG00000200259	SNORD35A	small nucleolar RNA, C/D box 35A [Source:HGNC Symbol;Acc:HGNC:10162]	256.369	0.59125	0.208575	2.83471	0.00458676	0.0476959
ENSG00000284112	MIR195	microRNA 195 [Source:HGNC Symbol;Acc:HGNC:31566]	24.525	1.11737	0.394835	2.82997	0.00465531	0.0480725
ENSG00000207996	MIR301A	microRNA 301a [Source:HGNC Symbol;Acc:HGNC:31622]	92.8859	-0.790989	0.280507	-2.81986	0.00480453	0.0489338
