# Supplementary material
Source: HighWire-hosted journal article supplement (doi:10.1101/rna.080097.124)
Supplement: Supplemental_TableS16.xlsx [file Supplemental_TableS16.xlsx]

## Sheet: List1
Antibodies	SOURCE	IDENTIFIER
Primary antibody anti-ADAR1 (rabbit)	Sigma (Merck)	HPA003890
Primary antibody anti-MAVS (mouse)	Santa Cruz	sc-166583
Primary antibody anti-ISG15 (mouse)	Santa Cruz	sc-166755
Primary antibody anti-a-tubulin (mouse)	AbCam	ab7291
Secondary antibody goat anti-rabbit, HRP conjugate	Santa Cruz	sc-2004
Secondary antibody goat anti-mouse, HRP conjugate	Santa Cruz	sc-2005
Secondary antibody substitute mouse IgGκ, HRP conjugate	Santa Cruz	sc-516102
Primers
ADAR1_T3qF	CCAAGGTGGAGAACGGAGAAGGCA
ADAR1_T3qR	ACATGGTACGGAGTCTCTCCCCGAG
ADAR1_T1qF	AGACAGCAACTCCACATCTGCCTTGG
ADAR1_T1qR	AGCCAAATTCAGGGCAGAGGAGTCA
ADAR_F	CGTCGTCAGCTTGGGAACAGGGAATC
ADAR_R	TGGAGCTTTTCTCCTCCCTTAGCAGGTTC
ADAR_T12_Test_F	TGAGTTTTTAGACATGGCCGA
ADAR_T1_test_F3	AACCGGAAGACAGAAACTCCA
ADAR_T34_TestF2	AGCACAGCGGAGTGGTAAGA
ADAR_T34_TestR2	AAGGAGGAAAATGTCAGGGAA
ADAR_T12_Test_F	TGAGTTTTTAGACATGGCCGA
ADAR_T12_Test_R	TCTTACCGAGGTTCATGGGGT
ADAR_T34_Test_F	CAATCCCTGTGGAATCCAGTG
ADAR_T34_Test_R	AGCAAATAGCACGGGTCAGAT
ADAR1_Targ1_Top	CACCGAATTTGGCTAAAAATAT
ADAR1_Targ1_Bot	AAACATATTTTTAGCCAAATTC
ADAR1_Targ2_Top	CACCGCTGAAGAACCCCATCAG
ADAR1_Targ2_Bot	AAACCTGATGGGGTTCTTCAGC
ADAR1_Targ3_Top	CACCGTGACATTGTGCCTACGT
ADAR1_Targ3_Bot	AAACACGTAGGCACAATGTCAC
ADAR1_Targ4_Top	CACCGGTTACCTTTTCAGCCAA
ADAR1_Targ4_Bot	AAACTTGGCTGAAAAGGTAACC
SULT1E1_F	TGGTGGCTGGTCATCCAAATCCTGGA
SULT1E1_R	ACCAGGAACCATAAGGAACCTGTCCTTGC
AKR1C1_F	ACCCTTGATATTTTTGCTGGCCCCCC
AKR1C1_R	TGGGCTTTGCTGTAGCTTGCTGAAATCAC
TUBA4A_F	AGGGGACGACTCCTTCACCACC
TUBA4A_R	TGGGCCATTTCGGATCTCATCAATGACC
ITGA5_F	CCGAGACCTGGATGGCAATGGATATCC
ITGA5_R	GGCGGCCCCTGTATACCACA
IFT27_F	CATTTTTGACTCTGCTGGCAAGGAGCTGT
IFT27_R	CCAACTAAAACACCTGGGAGAGAGATGCC
ADAR_F	CGTCGTCAGCTTGGGAACAGGGAATC
ADAR_R	TGGAGCTTTTCTCCTCCCTTAGCAGGTTC
HSP90AA1_F	CTACACATCTGCCTCTGGTGATGAGATGGT
HSP90AA1_R	ACCTGGTCCTTGGTCTCACCTGTG
OXLD1_F	CTCGCAGGACTAGGGGCTCG
OXLD1_R	CGCTCCGGGATGGTGCCTTT
RPL37_F	AGCGCAAGAGAAAGTATAACTGGAGTGCC
RPL37_R	CGGAATCCATGCCTGAATCTGCGG
GTF3A_F	TGTGACTATGAAGGGTGTGGCAAGGC
GTF3A_R	CCATTGGCTGCACAAACAAACGGCT
POC5_F	CATCCAGTCACAGTGCAAACCATTCCTCA
POC5_R	TGGGTGTGAGCTGATCTGGTTCCAA
