# Supplementary material
Source: HighWire-hosted journal article supplement (doi:10.1101/rna.080097.124)
Supplement: Supplemental_TableS17.xlsx [file Supplemental_TableS17.xlsx]

## Sheet: List1
id	fileName	CellLine	RNAFraction	LibraryType
ERR8701896	miRNA_HP4.fastq.gz	Huh7.5 wt	Polysomal	miRNA
ERR8701892	miRNA_HM2.fastq.gz	Huh7.5 wt	Unbound	miRNA
ERR8701816	miRNA_AP2.fastq.gz	Huh7.5 ADAR1 KO	Polysomal	miRNA
ERR8701812	miRNA_HP3.fastq.gz	Huh7.5 wt	Polysomal	miRNA
ERR8701808	miRNA_AT3.fastq.gz	Huh7.5 ADAR1 KO	Total	miRNA
ERR8701805	miRNA_AP1.fastq.gz	Huh7.5 ADAR1 KO	Polysomal	miRNA
ERR8701801	miRNA_HT4.fastq.gz	Huh7.5 wt	Total	miRNA
ERR8701747	miRNA_HP2.fastq.gz	Huh7.5 wt	Polysomal	miRNA
ERR8701742	miRNA_AT2.fastq.gz	Huh7.5 ADAR1 KO	Total	miRNA
ERR8701737	miRNA_AM3.fastq.gz	Huh7.5 ADAR1 KO	Unbound	miRNA
ERR8701732	miRNA_HT3.fastq.gz	Huh7.5 wt	Total	miRNA
ERR8701714	miRNA_HM4.fastq.gz	Huh7.5 wt	Unbound	miRNA
ERR8701709	miRNA_AT1.fastq.gz	Huh7.5 ADAR1 KO	Total	miRNA
ERR8701705	miRNA_AM2.fastq.gz	Huh7.5 ADAR1 KO	Unbound	miRNA
ERR8701686	miRNA_HT2.fastq.gz	Huh7.5 wt	Total	miRNA
ERR8701681	miRNA_HM3.fastq.gz	Huh7.5 wt	Unbound	miRNA
ERR8701676	miRNA_AP3.fastq.gz	Huh7.5 ADAR1 KO	Polysomal	miRNA
ERR8701671	miRNA_AM1.fastq.gz	Huh7.5 ADAR1 KO	Unbound	miRNA
ERR8601631	mRNA_HP4.fastq.gz	Huh7.5 wt	Polysomal	mRNA
ERR8579308	mRNA_HM2.fastq.gz	Huh7.5 wt	Unbound	mRNA
ERR8579238	mRNA_AP2.fastq.gz	Huh7.5 ADAR1 KO	Polysomal	mRNA
ERR8579158	mRNA_HP3.fastq.gz	Huh7.5 wt	Polysomal	mRNA
ERR8579099	mRNA_AT3.fastq.gz	Huh7.5 ADAR1 KO	Total	mRNA
ERR8579006	mRNA_AP1.fastq.gz	Huh7.5 ADAR1 KO	Polysomal	mRNA
ERR8578931	mRNA_HT4.fastq.gz	Huh7.5 wt	Total	mRNA
ERR8578902	mRNA_HP2.fastq.gz	Huh7.5 wt	Polysomal	mRNA
ERR8578453	mRNA_AT2.fastq.gz	Huh7.5 ADAR1 KO	Total	mRNA
ERR8577887	mRNA_AM3.fastq.gz	Huh7.5 ADAR1 KO	Unbound	mRNA
ERR8577456	mRNA_HT3.fastq.gz	Huh7.5 wt	Total	mRNA
ERR8577445	mRNA_HM4.fastq.gz	Huh7.5 wt	Unbound	mRNA
ERR8577429	mRNA_AT1.fastq.gz	Huh7.5 ADAR1 KO	Total	mRNA
ERR8577025	mRNA_AM2.fastq.gz	Huh7.5 ADAR1 KO	Unbound	mRNA
ERR8576795	mRNA_HT2.fastq.gz	Huh7.5 wt	Total	mRNA
ERR8576364	mRNA_HM3.fastq.gz	Huh7.5 wt	Unbound	mRNA
ERR8576319	mRNA_AP3.fastq.gz	Huh7.5 ADAR1 KO	Polysomal	mRNA
ERR8576292	mRNA_AM1.fastq.gz	Huh7.5 ADAR1 KO	Unbound	mRNA
